# Supplementary material for: To Tame a Songbird: The Genomics of the Domestication Syndrome in a Songbird Model Species
Source: Research Square preprint supplement (doi:10.21203/rs.3.rs-4921127/v1), 2025-04-11
Supplement: Supplementary file 1 [file 4faf6b0a3068c2ac79b70012.xlsx]

## Sheet: BFWinThetas
(indexStart,indexStop)(firstPos_withData,lastPos_withData)(WinStart,WinStop)	RefSeq	midPos	tW	tP	tF	tH	tL	Tajima	fuf	fud	fayh	zeng	nSites
(575,1713)(11483,21209)(10001,20001)	NC_044998.1	15001	0.255006	0.103635	0.574663	0.412292	0.257963	-1.00129	-0.938177	-0.744916	-0.661947	0.005483	1138
(1713,10359)(21209,30002)(20002,30002)	NC_044998.1	25002	31.5223	30.6474	35.8022	35.3818	33.0146	-0.11223	-0.286909	-0.299049	-0.143674	0.048923	8646
(10360,19808)(30003,40003)(30003,40003)	NC_044998.1	35003	28.3456	27.452	25.6963	49.3914	38.4217	-0.127208	0.108128	0.204665	-0.739714	0.366709	9448
(19809,29643)(40004,50004)(40004,50004)	NC_044998.1	45004	18.3538	19.8904	13.2249	27.2242	23.5573	0.333942	0.617727	0.593768	-0.379956	0.289787	9834
(29644,39585)(50005,60005)(50005,60005)	NC_044998.1	55005	17.2204	17.0719	15.9224	33.997	25.5344	-0.034332	0.113005	0.159289	-0.933705	0.492652	9941
(39586,49520)(60006,70006)(60006,70006)	NC_044998.1	65006	19.2203	19.6026	21.9412	25.6002	22.6014	0.079458	-0.207627	-0.301917	-0.296907	0.180017	9934
(49521,59379)(70007,80007)(70007,80007)	NC_044998.1	75007	21.9349	25.2561	20.7893	26.0492	25.6527	0.607176	0.350518	0.112502	-0.034463	0.173982	9858
(59380,69177)(80008,90008)(80008,90008)	NC_044998.1	85008	21.0588	23.0259	15.3036	35.7305	29.3782	0.374151	0.629583	0.58698	-0.574717	0.405153	9797
(69178,79065)(90009,100009)(90009,100009)	NC_044998.1	95009	21.9536	26.1591	17.2955	31.8079	28.9835	0.768204	0.694993	0.457101	-0.24524	0.328705	9887
(79066,88816)(100010,110010)(100010,110010)	NC_044998.1	105010	27.6329	32.3512	18.1517	47.2605	39.8059	0.688618	0.895967	0.750252	-0.515522	0.454245	9750
(88817,98686)(110011,120011)(110011,120011)	NC_044998.1	115011	26.4403	29.3237	25.7971	40.4076	34.8657	0.439371	0.232035	0.05305	-0.400369	0.328325	9869
(98687,107291)(120012,130012)(120012,130012)	NC_044998.1	125012	19.041	25.0066	12.9867	24.5216	24.7641	1.25118	1.07654	0.677623	0.024233	0.307513	8604
(107292,117138)(130013,140013)(130013,140013)	NC_044998.1	135013	19.9546	25.9731	12.947	27.0887	26.5309	1.20619	1.11681	0.751198	-0.053225	0.33756	9846
(117139,127022)(140014,150014)(140014,150014)	NC_044998.1	145014	19.797	24.8326	9.81749	25.5017	25.1671	1.01701	1.2969	1.07762	-0.032174	0.277794	9883
(127023,135525)(150015,160015)(150015,160015)	NC_044998.1	155015	19.6615	25.2177	7.51227	32.015	28.6164	1.12966	1.5391	1.32025	-0.329052	0.466345	8502
(135526,145419)(160016,170016)(160016,170016)	NC_044998.1	165016	20.6576	25.1849	11.459	30.6098	27.8973	0.877353	1.13936	0.955028	-0.250109	0.359261	9893
(145420,155265)(170017,180017)(170017,180017)	NC_044998.1	175017	14.9029	18.2381	8.69452	28.3584	23.2982	0.886048	1.07153	0.86862	-0.643613	0.572386	9845
(155266,165151)(180018,190018)(180018,190018)	NC_044998.1	185018	29.6897	42.0755	12.0053	48.1573	45.1164	1.68497	1.77211	1.30773	-0.195855	0.53643	9885
(165152,174750)(190019,200019)(190019,200019)	NC_044998.1	195019	24.3346	28.425	12.9994	40.0687	34.2469	0.675881	1.09781	1.01057	-0.456587	0.419027	9598
(174751,184549)(200020,210020)(200020,210020)	NC_044998.1	205020	30.7612	34.1932	24.9552	45.1363	39.6648	0.450954	0.526322	0.415187	-0.340233	0.298988	9798
(184550,194412)(210021,220021)(210021,220021)	NC_044998.1	215021	24.9512	29.6555	18.7704	36.7491	33.2023	0.758568	0.75658	0.538293	-0.271361	0.340349	9862
(194413,203806)(220022,230022)(220022,230022)	NC_044998.1	225022	25.3624	33.1604	12.1765	47.1486	40.1545	1.23753	1.43614	1.13092	-0.526525	0.600456	9393
(203807,213253)(230023,240023)(230023,240023)	NC_044998.1	235023	27.2312	37.2868	12.7229	49.3001	43.2935	1.48874	1.57164	1.16398	-0.421457	0.608064	9446
(213254,223113)(240024,250024)(240024,250024)	NC_044998.1	245024	26.5463	38.3163	9.24792	36.9667	37.6415	1.78649	1.90533	1.42146	0.048557	0.430669	9859
(223114,232947)(250025,260025)(250025,260025)	NC_044998.1	255025	24.8854	34.4982	8.32973	39.8923	37.1952	1.55406	1.8234	1.44541	-0.206888	0.509084	9833
(232948,241797)(260026,270026)(260026,270026)	NC_044998.1	265026	26.4579	37.7233	9.11575	43.8687	40.796	1.71548	1.88107	1.42954	-0.221832	0.558369	8849
(241798,251709)(270027,280027)(270027,280027)	NC_044998.1	275027	28.8306	39.7596	14.3226	38.7122	39.2359	1.53017	1.54158	1.10301	0.034726	0.372425	9911
(251710,261387)(280028,290028)(280028,290028)	NC_044998.1	285028	28.751	37.2087	19.5087	38.28	37.7443	1.18737	1.07551	0.704513	-0.035616	0.322764	9677
(261388,271033)(290029,300029)(290029,300029)	NC_044998.1	295029	31.8805	46.4789	8.18581	41.149	43.8139	1.85213	2.10846	1.63796	0.159943	0.386882	9645
(271034,280837)(300030,310030)(300030,310030)	NC_044998.1	305030	27.7608	42.1342	5.11688	51.5447	46.8394	2.08827	2.32551	1.78405	-0.323907	0.708715	9803
(280838,290729)(310031,320031)(310031,320031)	NC_044998.1	315031	11.832	16.3974	3.44958	20.2236	18.3105	1.5124	1.79164	1.44081	-0.305106	0.551853	9891
(290730,300605)(320032,330032)(320032,330032)	NC_044998.1	325032	17.1861	23.7774	9.79772	24.695	24.2362	1.52646	1.37687	0.908342	-0.050719	0.418568	9875
(300606,308187)(330033,340033)(330033,340033)	NC_044998.1	335033	21.1772	25.7877	11.8231	40.4384	33.113	0.872169	1.13254	0.949095	-0.659092	0.578094	7581
(308188,317905)(340034,350034)(340034,350034)	NC_044998.1	345034	22.6566	24.9068	24.2035	35.7012	30.304	0.398614	0.053533	-0.147416	-0.454268	0.346718	9717
(317906,327416)(350035,360283)(350035,360035)	NC_044998.1	355035	16.7925	20.2973	13.7225	24.1099	22.2036	0.830006	0.661558	0.385496	-0.215608	0.328575	9510
(327416,336681)(360283,370037)(360036,370036)	NC_044998.1	365036	38.443	47.69	19.5511	64.5271	56.1086	0.976111	1.29466	1.09265	-0.419602	0.476188	9265
(336681,346544)(370037,380037)(370037,380037)	NC_044998.1	375037	55.3212	59.6746	17.2715	90.9886	75.3316	0.32091	1.37136	1.54992	-0.543441	0.37629	9863
(346545,354909)(380038,390038)(380038,390038)	NC_044998.1	385038	49.2851	55.8634	7.60703	101.835	78.8494	0.543554	1.74616	1.89846	-0.895009	0.623356	8364
(354910,362606)(390039,400039)(390039,400039)	NC_044998.1	395039	39.6798	45.3298	9.18543	70.7757	58.0528	0.578106	1.61302	1.71104	-0.614512	0.480008	7696
(362607,371877)(400040,410040)(400040,410040)	NC_044998.1	405040	47.4641	47.4368	15.8324	96.72	72.0784	-0.002343	1.18614	1.49414	-0.99608	0.538694	9270
(371878,380952)(410041,420041)(410041,420041)	NC_044998.1	415041	52.6558	57.527	12.4892	88.847	73.187	0.377037	1.52826	1.71628	-0.570922	0.405444	9074
(380953,389134)(420042,430049)(420042,430042)	NC_044998.1	425042	31.6422	37.1139	10.587	49.9061	43.51	0.69933	1.47111	1.46589	-0.386742	0.387604	8181
(389134,397911)(430049,440043)(430043,440043)	NC_044998.1	435043	30.0411	34.1931	16.9453	45.0868	39.64	0.558383	1.00512	0.957698	-0.346745	0.329942	8777
(397912,407803)(440044,450044)(440044,450044)	NC_044998.1	445044	34.2605	39.675	8.94888	58.855	49.265	0.640081	1.57914	1.63403	-0.535894	0.453132	9891
(407804,417040)(450045,460045)(450045,460045)	NC_044998.1	455045	33.8287	38.7052	12.0488	62.3619	50.5336	0.5837	1.38673	1.4231	-0.669344	0.510827	9236
(417041,426417)(460046,470046)(460046,470046)	NC_044998.1	465046	20.5432	21.1395	11.6511	39.7695	30.4545	0.116174	0.791714	0.927957	-0.863646	0.49451	9376
(426418,436241)(470047,480047)(470047,480047)	NC_044998.1	475047	26.6308	26.4655	13.6811	56.2578	41.3616	-0.025015	0.835447	1.06094	-1.06852	0.570005	9823
(436242,442931)(480048,490048)(480048,490048)	NC_044998.1	485048	19.2102	19.509	8.60723	34.2499	26.8795	0.062151	0.968396	1.17712	-0.730126	0.408545	6689
(442932,452797)(490049,500049)(490049,500049)	NC_044998.1	495049	38.2486	37.9479	20.3581	72.8202	55.384	-0.031903	0.81326	1.03976	-0.873452	0.464216	9865
(452798,462608)(500050,510050)(500050,510050)	NC_044998.1	505050	25.3725	26.8411	11.4072	55.3408	41.0909	0.232975	1.0559	1.19731	-1.07233	0.637812	9810
(462609,466074)(510051,523782)(510051,520051)	NC_044998.1	515051	13.0693	12.641	10.9492	23.8699	18.2555	-0.129029	0.214044	0.333656	-0.812317	0.40143	3465
(466074,472281)(523782,530052)(520052,530052)	NC_044998.1	525052	17.93	17.4001	11.1146	23.9223	20.6612	-0.11779	0.595262	0.806065	-0.345779	0.155606	6207
(472282,477896)(530053,540053)(530053,540053)	NC_044998.1	535053	22.6453	26.5229	5.05695	43.2721	34.8975	0.687239	1.6348	1.67688	-0.705214	0.555761	5614
(477897,487633)(540054,550054)(540054,550054)	NC_044998.1	545054	27.8987	30.8989	9.89061	51.1957	41.0473	0.43378	1.31359	1.4122	-0.695187	0.486058	9736
(487634,497184)(550055,560055)(550055,560055)	NC_044998.1	555055	24.9275	31.3683	0.836293	50.242	40.8051	1.03953	2.12405	2.09998	-0.72268	0.655545	9550
(497185,507007)(560056,570056)(560056,570056)	NC_044998.1	565056	36.1011	46.9509	1.15282	75.3467	61.1488	1.21834	2.23846	2.14639	-0.75323	0.718388	9822
(507008,516793)(570057,580057)(570057,580057)	NC_044998.1	575057	24.7577	30.6137	4.76962	40.4811	35.5474	0.951479	1.80957	1.7535	-0.380391	0.448475	9785
(516794,524935)(580058,591640)(580058,590058)	NC_044998.1	585058	31.39	30.5461	11.1042	53.2064	41.8763	-0.10871	1.08647	1.42308	-0.690541	0.345191	8141
(524935,532587)(591640,600059)(590059,600059)	NC_044998.1	595059	18.607	17.7646	1.59339	42.603	30.1838	-0.180654	1.47972	1.94502	-1.26958	0.636179	7652
(532588,541104)(600060,610060)(600060,610060)	NC_044998.1	605060	25.9658	27.677	0.873267	69.9713	48.8242	0.265401	1.79408	2.10519	-1.55536	0.906726	8516
(541105,550750)(610061,620061)(610061,620061)	NC_044998.1	615061	24.3936	22.4473	11.0225	64.4324	43.4399	-0.32084	0.811221	1.18938	-1.64243	0.803242	9645
(550751,559841)(620062,630062)(620062,630062)	NC_044998.1	625062	47.7141	49.6443	26.9323	107.363	78.5038	0.164673	0.848071	0.976679	-1.1605	0.67035	9090
(559842,569134)(630063,640063)(630063,640063)	NC_044998.1	635063	42.6143	46.9358	16.9267	92.6238	69.7798	0.412165	1.25011	1.34599	-1.02785	0.66141	9292
(569135,578884)(640064,650064)(640064,650064)	NC_044998.1	645064	38.4143	33.7968	27.5308	79.4893	56.6431	-0.487785	0.288504	0.629921	-1.13956	0.491731	9749
(578885,586903)(650065,660375)(650065,660065)	NC_044998.1	655065	20.736	20.8811	16.6273	49.1953	35.0382	0.028008	0.35185	0.425085	-1.30053	0.707107	8018
(586903,595467)(660375,670066)(660066,670066)	NC_044998.1	665066	35.1465	38.2906	11.0658	61.3993	49.845	0.362478	1.36534	1.51722	-0.629508	0.432854	8564
(595468,605273)(670067,680067)(670067,680067)	NC_044998.1	675067	27.9915	27.633	12.0794	48.809	38.221	-0.051656	0.96946	1.24393	-0.722918	0.37692	9805
(605274,614501)(680068,690344)(680068,690068)	NC_044998.1	685068	32.5625	34.74	22.8274	38.5376	36.6388	0.27059	0.642778	0.659577	-0.111594	0.129428	9227
(614501,622692)(690344,700524)(690069,700069)	NC_044998.1	695069	27.5599	30.6159	14.5467	40.82	35.7179	0.447165	1.01649	1.03231	-0.353756	0.305218	8191
(622692,631855)(700524,710070)(700070,710070)	NC_044998.1	705070	28.775	30.9624	13.4975	43.0155	36.9889	0.306845	1.06039	1.16363	-0.400374	0.294552	9163
(631856,640517)(710071,720071)(710071,720071)	NC_044998.1	715071	29.2738	25.4111	19.0575	49.9097	37.6604	-0.532794	0.379502	0.765617	-0.800042	0.295703	8661
(640518,650213)(720072,730072)(720072,730072)	NC_044998.1	725072	41.7047	49.319	22.9955	69.5515	59.4353	0.741827	1.11967	1.00086	-0.465038	0.440999	9695
(650214,659017)(730073,740073)(730073,740073)	NC_044998.1	735073	43.9885	48.3461	25.8714	75.6177	61.9819	0.402813	0.907957	0.92079	-0.594481	0.42456	8803
(659018,668821)(740074,750074)(740074,750074)	NC_044998.1	745074	37.6288	47.1624	10.5669	56.3926	51.7775	1.02778	1.7188	1.59754	-0.234972	0.389534	9803
(668822,676888)(750075,760075)(750075,760075)	NC_044998.1	755075	37.5486	45.3471	21.8488	40.6042	42.9757	0.842494	1.10592	0.928697	0.120995	0.149729	8066
(676889,686559)(760076,770076)(760076,770076)	NC_044998.1	765076	45.9624	56.0402	18.7688	69.7358	62.888	0.892109	1.4431	1.32493	-0.285798	0.382398	9670
(686560,695534)(770077,780100)(770077,780077)	NC_044998.1	775077	29.5096	33.1451	7.30841	43.3147	38.2299	0.497538	1.53148	1.65121	-0.329473	0.305051	8974
(695534,704850)(780100,790504)(780078,790078)	NC_044998.1	785078	42.3232	50.8961	10.3973	72.8363	61.8662	0.823193	1.6983	1.68392	-0.496964	0.479057	9316
(704850,713905)(790504,800079)(790079,800079)	NC_044998.1	795079	32.9177	40.6335	9.29017	43.9496	42.2916	0.948645	1.67375	1.58442	-0.096404	0.294466	9055
(713906,723554)(800080,810080)(800080,810080)	NC_044998.1	805080	44.6758	54.9663	11.7077	69.9918	62.479	0.936804	1.72159	1.65078	-0.322527	0.413682	9648
(723555,733086)(810081,820081)(810081,820081)	NC_044998.1	815081	39.0287	45.6601	11.4744	49.355	47.5076	0.689669	1.55013	1.57076	-0.090709	0.225167	9531
(733087,741993)(820082,830082)(820082,830082)	NC_044998.1	825082	43.8087	51.9369	14.0888	77.9835	64.9602	0.754399	1.5351	1.51646	-0.570096	0.501102	8906
(741994,750843)(830083,840083)(830083,840083)	NC_044998.1	835083	44.0655	50.647	18.8087	73.6806	62.1638	0.60734	1.28407	1.28151	-0.501228	0.426298	8849
(750844,760526)(840084,850084)(840084,850084)	NC_044998.1	845084	46.9093	60.3971	12.027	76.9585	68.6778	1.17018	1.83618	1.66647	-0.338665	0.481986	9682
(760527,769592)(850085,860085)(850085,860085)	NC_044998.1	855085	40.4965	48.9677	14.2003	54.4535	51.7106	0.849563	1.52139	1.44696	-0.129827	0.287141	9065
(769593,777268)(860086,870086)(860086,870086)	NC_044998.1	865086	41.8439	51.7517	6.02743	64.1323	57.942	0.962115	1.93864	1.9099	-0.283623	0.399081	7675
(777269,786767)(870087,880106)(870087,880087)	NC_044998.1	875087	53.3631	66.737	9.56376	84.4567	75.5968	1.0216	1.91503	1.8475	-0.318745	0.433297	9498
(786767,794830)(880106,890088)(880088,890088)	NC_044998.1	885088	40.0578	49.6348	13.4861	52.9984	51.3166	0.970817	1.59854	1.47746	-0.080469	0.291405	8063
(794831,804270)(890089,900089)(890089,900089)	NC_044998.1	895089	31.3895	36.5575	10.772	53.6746	45.1161	0.665731	1.44099	1.44637	-0.521627	0.451865	9439
(804271,813945)(900090,910090)(900090,910090)	NC_044998.1	905090	43.3617	55.2929	7.27789	78.2474	66.7702	1.11861	1.96687	1.85942	-0.507564	0.560223	9674
(813946,822987)(910091,920091)(910091,920091)	NC_044998.1	915091	44.062	50.7626	12.3153	64.9209	57.8417	0.618376	1.55073	1.61092	-0.30812	0.324602	9041
(822988,832857)(920092,930092)(920092,930092)	NC_044998.1	925092	43.0447	48.3877	14.4971	69.3311	58.8594	0.504568	1.39816	1.48148	-0.466484	0.38124	9869
(832858,841856)(930093,940093)(930093,940093)	NC_044998.1	935093	36.3969	41.8729	8.1843	55.7983	48.8356	0.609987	1.63373	1.71927	-0.366407	0.35389	8998
(841857,851748)(940094,950094)(940094,950094)	NC_044998.1	945094	39.3995	42.2341	10.4055	69.759	55.9965	0.292066	1.43016	1.63794	-0.669417	0.436659	9891
(851749,861479)(950095,960095)(950095,960095)	NC_044998.1	955095	31.5045	35.7693	7.98851	42.7228	39.246	0.54741	1.54708	1.644	-0.211135	0.253928	9730
(861480,871142)(960096,970098)(960096,970096)	NC_044998.1	965096	43.7012	51.8022	13.3738	67.5335	59.6679	0.753697	1.56234	1.55112	-0.34516	0.379187	9662
(871142,880871)(970098,980097)(970097,980097)	NC_044998.1	975097	43.839	49.7395	22.9615	65.4546	57.597	0.547275	1.08538	1.06457	-0.343726	0.325722	9729
(880872,890499)(980098,990098)(980098,990098)	NC_044998.1	985098	42.9255	54.0547	17.7556	71.2467	62.6507	1.05388	1.50155	1.30968	-0.383985	0.476817	9627
(890500,900232)(990099,1000099)(990099,1000099)	NC_044998.1	995099	39.2425	47.2421	17.5028	62.0228	54.6324	0.827491	1.34143	1.23283	-0.360902	0.406499	9732
(900233,910074)(1000100,1010100)(1000100,1010100)	NC_044998.1	1005100	47.3719	59.6919	6.97962	84.1224	71.9071	1.05856	1.98208	1.91153	-0.494729	0.537998	9841
(910075,918830)(1010101,1020101)(1010101,1020101)	NC_044998.1	1015101	43.2745	50.0812	13.8456	58.6528	54.367	0.639438	1.48724	1.51943	-0.189911	0.266001	8755
(918831,927384)(1020102,1030102)(1020102,1030102)	NC_044998.1	1025102	44.926	52.4991	15.4187	70.0132	61.2561	0.685635	1.46776	1.46957	-0.373864	0.377362	8553
(927385,935762)(1030103,1040103)(1030103,1040103)	NC_044998.1	1035103	29.1604	32.9509	2.97841	49.8339	41.3924	0.524837	1.79688	1.9693	-0.553469	0.432939	8377
(935763,944646)(1040104,1050104)(1040104,1050104)	NC_044998.1	1045104	37.4422	40.5942	19.3325	54.6487	47.6214	0.34147	1.0034	1.07416	-0.359554	0.281628	8883
(944647,954171)(1050105,1060118)(1050105,1060105)	NC_044998.1	1055105	31.8246	34.0243	12.4284	53.1012	43.5627	0.279553	1.19109	1.34305	-0.573468	0.381204	9524
(954171,963173)(1060118,1070106)(1060106,1070106)	NC_044998.1	1065106	36.967	39.3424	22.2183	62.7542	51.0483	0.260595	0.818122	0.885546	-0.606584	0.394529	9002
(963174,972670)(1070107,1080107)(1070107,1080107)	NC_044998.1	1075107	37.3653	40.2274	16.9831	52.9541	46.5907	0.310694	1.09913	1.21133	-0.326248	0.255757	9496
(972671,981897)(1080108,1090108)(1080108,1090108)	NC_044998.1	1085108	38.4813	38.2382	23.7873	62.7009	50.4696	-0.02563	0.664246	0.849045	-0.609042	0.322837	9226
(981898,989608)(1090109,1100109)(1090109,1100109)	NC_044998.1	1095109	30.7758	35.9962	9.31234	43.5901	39.7932	0.685628	1.51958	1.53415	-0.23599	0.302669	7710
(989609,999329)(1100110,1110110)(1100110,1110110)	NC_044998.1	1105110	54.7662	58.8144	24.4172	97.2099	78.0121	0.301395	1.12341	1.24838	-0.673057	0.441522	9720
(999330,1008504)(1110111,1120111)(1110111,1120111)	NC_044998.1	1115111	31.3873	34.8652	13.7036	53.3684	44.1168	0.44805	1.18267	1.24064	-0.563908	0.419073	9174
(1008505,1017731)(1120112,1130112)(1120112,1130112)	NC_044998.1	1125112	38.904	41.685	13.056	65.3172	53.5011	0.290146	1.30218	1.47801	-0.582015	0.388873	9226
(1017732,1027617)(1130113,1140113)(1130113,1140113)	NC_044998.1	1135113	36.3336	41.1726	12.799	45.8199	43.4963	0.539961	1.37828	1.43658	-0.122491	0.204134	9885
(1027618,1037232)(1140114,1150114)(1140114,1150114)	NC_044998.1	1145114	31.3835	36.7142	16.3104	37.8652	37.2897	0.686818	1.14045	1.05761	-0.035082	0.194463	9614
(1037233,1047057)(1150115,1160115)(1150115,1160115)	NC_044998.1	1155115	45.6235	49.5054	31.5243	68.4505	58.978	0.346156	0.70121	0.691851	-0.398264	0.303933	9824
(1047058,1056259)(1160116,1170116)(1160116,1170116)	NC_044998.1	1165116	55.4252	61.7553	31.3981	97.1908	79.4731	0.465753	0.97999	0.976944	-0.61382	0.451372	9201
(1056260,1064920)(1170117,1180117)(1170117,1180117)	NC_044998.1	1175117	41.3954	45.9981	21.0193	71.9154	58.9568	0.451719	1.07014	1.09784	-0.600124	0.440015	8660
(1064921,1073680)(1180118,1190118)(1180118,1190118)	NC_044998.1	1185118	32.238	35.1511	10.7381	68.9548	52.0529	0.365572	1.32995	1.47059	-1.00325	0.635382	8759
(1073681,1083246)(1190119,1200119)(1190119,1200119)	NC_044998.1	1195119	33.003	38.5855	11.05	53.4039	45.9947	0.684616	1.46677	1.46851	-0.429678	0.407073	9565
(1083247,1092479)(1200120,1210121)(1200120,1210120)	NC_044998.1	1205120	40.9272	44.6904	17.5364	66.9381	55.8143	0.373496	1.17617	1.2741	-0.521007	0.377225	9232
(1092479,1102383)(1210121,1220121)(1210121,1220121)	NC_044998.1	1215121	28.5892	32.7777	8.20429	46.9597	39.8687	0.591283	1.5012	1.56217	-0.474126	0.407067	9904
(1102384,1111786)(1220122,1230122)(1220122,1230122)	NC_044998.1	1225122	34.9661	42.0505	8.18971	61.9228	51.9867	0.82088	1.70654	1.69536	-0.544115	0.503785	9402
(1111787,1121532)(1230123,1240123)(1230123,1240123)	NC_044998.1	1235123	43.4022	49.8273	15.8274	65.4701	57.6487	0.601833	1.3915	1.41967	-0.345567	0.340639	9745
(1121533,1131326)(1240124,1250124)(1240124,1250124)	NC_044998.1	1245124	38.2795	44.1297	14.8854	59.7901	51.9599	0.620138	1.35105	1.35857	-0.391934	0.37032	9793
(1131327,1140936)(1250125,1260125)(1250125,1260125)	NC_044998.1	1255125	52.2936	59.6049	22.06	86.4216	73.0133	0.569776	1.28258	1.30051	-0.492201	0.411972	9609
(1140937,1150166)(1260126,1270126)(1260126,1270126)	NC_044998.1	1265126	34.4708	38.0782	11.5362	61.9378	50.008	0.423887	1.35612	1.47198	-0.662606	0.466394	9229
(1150167,1159330)(1270127,1280127)(1270127,1280127)	NC_044998.1	1275127	38.8271	45.4992	7.59503	53.5368	49.518	0.69745	1.72734	1.78927	-0.198339	0.285367	9163
(1159331,1169020)(1280128,1290128)(1280128,1290128)	NC_044998.1	1285128	42.4908	50.5753	12.8624	63.531	57.0532	0.773276	1.57545	1.55682	-0.292307	0.355574	9689
(1169021,1178850)(1290129,1300129)(1290129,1300129)	NC_044998.1	1295129	40.2447	49.9443	10.2155	59.6841	54.8142	0.978748	1.74899	1.66227	-0.231932	0.375362	9829
(1178851,1188576)(1300130,1310130)(1300130,1310130)	NC_044998.1	1305130	47.1368	58.5747	11.446	73.9741	66.2744	0.987605	1.78069	1.69716	-0.313392	0.421711	9725
(1188577,1197756)(1310131,1320131)(1310131,1320131)	NC_044998.1	1315131	44.8459	54.7596	16.1252	68.1587	61.4591	0.89912	1.53191	1.43286	-0.286531	0.384581	9179
(1197757,1207384)(1320132,1330132)(1320132,1330132)	NC_044998.1	1325132	51.444	61.4489	19.4627	69.5028	65.4758	0.792416	1.45732	1.39765	-0.150252	0.283561	9627
(1207385,1215869)(1330133,1340133)(1330133,1340133)	NC_044998.1	1335133	35.3873	43.4237	4.26651	53.1566	48.2902	0.920306	1.95093	1.94807	-0.263345	0.377426	8484
(1215870,1225675)(1340134,1350134)(1340134,1350134)	NC_044998.1	1345134	31.0381	35.7302	2.09661	47.6999	41.715	0.611125	1.89989	2.05209	-0.368862	0.355391	9805
(1225676,1235422)(1350135,1360135)(1350135,1360135)	NC_044998.1	1355135	39.7114	47.0062	2.79867	57.2143	52.1102	0.745818	1.97135	2.0696	-0.246329	0.323676	9746
(1235423,1245172)(1360136,1370136)(1360136,1370136)	NC_044998.1	1365136	35.9418	44.5658	2.62085	42.3353	43.4506	0.972615	2.05886	2.0551	0.059426	0.216298	9749
(1245173,1254986)(1370137,1380137)(1370137,1380137)	NC_044998.1	1375137	29.6786	34.8839	1.32402	43.5062	39.1951	0.708392	1.97847	2.09752	-0.277768	0.331035	9813
(1254987,1264599)(1380138,1390138)(1380138,1390138)	NC_044998.1	1385138	50.9317	61.2686	4.89699	81.139	71.2038	0.826849	1.97575	2.03138	-0.374406	0.413747	9612
(1264600,1274472)(1390139,1400139)(1390139,1400139)	NC_044998.1	1395139	28.1249	34.6609	1.4921	35.3025	34.9817	0.937563	2.05809	2.07272	-0.021801	0.251468	9872
(1274473,1284243)(1400140,1410140)(1400140,1410140)	NC_044998.1	1405140	37.0775	45.425	3.57204	61.0822	53.2536	0.913071	1.99383	2.00602	-0.404466	0.451885	9770
(1284244,1293641)(1410141,1420141)(1410141,1420141)	NC_044998.1	1415141	28.9414	34.2429	14.914	49.104	41.6735	0.739484	1.16714	1.06262	-0.490839	0.453989	9397
(1293642,1302220)(1420142,1430142)(1420142,1430142)	NC_044998.1	1425142	28.7128	34.0156	13.2031	49.5516	41.7836	0.745418	1.26624	1.18374	-0.517174	0.469711	8578
(1302221,1311590)(1430143,1440179)(1430143,1440143)	NC_044998.1	1435143	34.273	42.8738	18.4314	59.2942	51.084	1.01638	1.25575	1.02232	-0.458625	0.507504	9369
(1311590,1320752)(1440179,1450144)(1440144,1450144)	NC_044998.1	1445144	35.9597	47.2093	12.8135	67.8857	57.5475	1.26812	1.6875	1.42688	-0.550604	0.621556	9162
(1320753,1330606)(1450145,1460145)(1450145,1460145)	NC_044998.1	1455145	39.2202	47.663	17.0457	79.3597	63.5113	0.873825	1.38179	1.25817	-0.774378	0.64197	9853
(1330607,1340048)(1460146,1470146)(1460146,1470146)	NC_044998.1	1465146	34.1431	44.1658	16.9505	45.9335	45.0497	1.18885	1.40332	1.11353	-0.049556	0.330492	9441
(1340049,1349331)(1470147,1480147)(1470147,1480147)	NC_044998.1	1475147	28.3041	32.0184	16.6871	57.096	44.5572	0.529497	0.945566	0.898709	-0.846747	0.592362	9282
(1349332,1358159)(1480148,1490148)(1480148,1490148)	NC_044998.1	1485148	30.4434	44.3456	8.87571	48.3787	46.3621	1.84539	2.04096	1.55753	-0.126691	0.540058	8827
(1358160,1367816)(1490149,1500149)(1490149,1500149)	NC_044998.1	1495149	27.2603	34.2212	12.6088	49.044	41.6326	1.02948	1.38139	1.17429	-0.519472	0.543515	9656
(1367817,1376780)(1500150,1510150)(1500150,1510150)	NC_044998.1	1505150	37.7644	48.7631	2.64141	67.7833	58.2732	1.18153	2.15873	2.0663	-0.482467	0.562633	8963
(1376781,1386229)(1510151,1520151)(1510151,1520151)	NC_044998.1	1515151	24.7121	35.8446	1.27616	42.8474	39.346	1.81208	2.42467	2.05952	-0.270451	0.609364	9448
(1386230,1395546)(1520152,1530152)(1520152,1530152)	NC_044998.1	1525152	35.5326	51.8615	1.48696	52.6567	52.2591	1.86242	2.49996	2.12284	-0.021428	0.4873	9316
(1395547,1404670)(1530153,1540153)(1530153,1540153)	NC_044998.1	1535153	37.9592	51.963	1.64425	49.405	50.684	1.49677	2.34355	2.12594	0.064555	0.347321	9123
(1404671,1414002)(1540154,1550154)(1540154,1550154)	NC_044998.1	1545154	30.2724	39.5433	1.98226	41.4896	40.5164	1.23744	2.17293	2.05391	-0.061482	0.349471	9331
(1414003,1423685)(1550155,1560155)(1550155,1560155)	NC_044998.1	1555155	40.7891	54.5457	1.54367	63.8659	59.2058	1.36988	2.30327	2.14464	-0.218998	0.468224	9682
(1423686,1433505)(1560156,1570156)(1560156,1570156)	NC_044998.1	1565156	35.4133	46.2669	1.3126	49.187	47.7269	1.24201	2.23818	2.13311	-0.078952	0.359927	9819
(1433506,1442957)(1570157,1580157)(1570157,1580157)	NC_044998.1	1575157	42.4572	58.6922	2.72883	62.0822	60.3872	1.55408	2.33965	2.08911	-0.076546	0.438148	9451
(1442958,1451912)(1580158,1590158)(1580158,1590158)	NC_044998.1	1585158	40.3382	54.4879	4.49309	59.8356	57.1618	1.42454	2.19601	1.97981	-0.127052	0.432444	8954
(1451913,1461016)(1590159,1600159)(1590159,1600159)	NC_044998.1	1595159	32.0519	44.12	1.36629	47.2383	45.6792	1.52308	2.34204	2.11046	-0.09308	0.439468	9103
(1461017,1470837)(1600160,1610160)(1600160,1610160)	NC_044998.1	1605160	31.4904	42.5173	2.44745	47.4969	45.0071	1.41599	2.2324	2.03125	-0.151267	0.443553	9820
(1470838,1479593)(1610161,1620161)(1610161,1620161)	NC_044998.1	1615161	33.0463	43.2115	7.94639	58.5333	50.8724	1.24502	1.87616	1.67693	-0.443698	0.557832	8755
(1479594,1488904)(1620162,1630162)(1620162,1630162)	NC_044998.1	1625162	35.5484	48.4614	15.0943	46.2121	47.3368	1.47216	1.65522	1.27483	0.060587	0.343282	9310
(1488905,1497997)(1630163,1640163)(1630163,1640163)	NC_044998.1	1635163	34.7848	49.0341	8.48415	43.8706	46.4524	1.65955	2.05389	1.6735	0.142112	0.347119	9092
(1497998,1506744)(1640164,1650164)(1640164,1650164)	NC_044998.1	1645164	24.2876	35.0198	1.4302	46.7882	40.904	1.77667	2.39486	2.04149	-0.46236	0.703763	8746
(1506745,1516242)(1650165,1660165)(1650165,1660165)	NC_044998.1	1655165	30.1578	43.7465	1.19833	45.6948	44.7207	1.82051	2.47035	2.11006	-0.061777	0.498659	9497
(1516243,1525842)(1660166,1670166)(1660166,1670166)	NC_044998.1	1665166	35.6538	50.7183	2.79165	66.9624	58.8403	1.71246	2.37071	2.04241	-0.436257	0.673234	9599
(1525843,1535730)(1670167,1680167)(1670167,1680167)	NC_044998.1	1675167	30.5596	42.821	1.39307	45.2721	44.0465	1.62152	2.37514	2.0987	-0.076706	0.455843	9887
(1535731,1545386)(1680168,1690168)(1680168,1690168)	NC_044998.1	1685168	29.0059	38.5746	4.63207	44.1862	41.3804	1.33177	2.0452	1.84252	-0.184933	0.440269	9655
(1545387,1555090)(1690169,1700169)(1690169,1700169)	NC_044998.1	1695169	28.2769	40.0901	3.05454	45.0719	42.581	1.68565	2.28628	1.953	-0.16837	0.521822	9703
(1555091,1564116)(1700170,1710170)(1700170,1710170)	NC_044998.1	1705170	24.97	32.9101	3.33066	36.4031	34.6566	1.27941	2.05448	1.88325	-0.13352	0.399268	9025
(1564117,1573785)(1710171,1720171)(1710171,1720171)	NC_044998.1	1715171	32.48	43.708	5.65734	51.772	47.74	1.39872	2.05812	1.82169	-0.23756	0.485732	9668
(1573786,1583623)(1720172,1730172)(1720172,1730172)	NC_044998.1	1725172	35.1425	48.035	2.54409	61.6315	54.8332	1.48652	2.28165	2.05411	-0.370426	0.579938	9837
(1583624,1593450)(1730173,1740173)(1730173,1740173)	NC_044998.1	1735173	33.0227	48.1039	3.01209	47.7177	47.9108	1.84842	2.40059	2.00638	0.011192	0.466219	9826
(1593451,1602312)(1740174,1750174)(1740174,1750174)	NC_044998.1	1745174	30.7119	41.9446	3.50194	40.5605	41.2525	1.47827	2.19356	1.94872	0.043103	0.354524	8861
(1602313,1612022)(1750175,1760175)(1750175,1760175)	NC_044998.1	1755175	28.6318	40.5962	3.5411	43.7748	42.1855	1.68653	2.26051	1.92009	-0.106109	0.488426	9709
(1612023,1621408)(1760176,1770176)(1760176,1770176)	NC_044998.1	1765176	32.6833	44.2163	2.42286	54.8631	49.5397	1.42794	2.2471	2.04303	-0.311712	0.533256	9385
(1621409,1631048)(1770177,1780177)(1770177,1780177)	NC_044998.1	1775177	36.7385	50.1815	1.4806	61.6524	55.917	1.48378	2.34064	2.12953	-0.299038	0.540638	9639
(1631049,1640461)(1780178,1790178)(1780178,1790178)	NC_044998.1	1785178	41.7655	57.0015	2.18331	78.9098	67.9557	1.48225	2.32842	2.11451	-0.502827	0.650472	9412
(1640462,1648701)(1790179,1800179)(1790179,1800179)	NC_044998.1	1795179	27.9567	36.0762	3.851	39.3319	37.704	1.17157	2.01098	1.88668	-0.111282	0.359591	8239
(1648702,1657668)(1800180,1810180)(1800180,1810180)	NC_044998.1	1805180	33.3469	46.1597	5.4542	50.2878	48.2237	1.5554	2.1469	1.84755	-0.118475	0.461403	8966
(1657669,1667211)(1810181,1820430)(1810181,1820181)	NC_044998.1	1815181	27.4042	38.2584	1.53247	40.9703	39.6144	1.59706	2.33571	2.06332	-0.094543	0.459371	9542
(1667211,1676706)(1820430,1830182)(1820182,1830182)	NC_044998.1	1825182	32.2192	47.5365	2.83268	50.841	49.1887	1.92329	2.4367	2.01115	-0.098128	0.544452	9495
(1676707,1686271)(1830183,1840183)(1830183,1840183)	NC_044998.1	1835183	34.5604	52.179	1.07496	59.7926	55.9858	2.06503	2.60458	2.14384	-0.210894	0.641502	9564
(1686272,1694834)(1840184,1850184)(1840184,1850184)	NC_044998.1	1845184	33.1063	45.7006	8.83479	56.6684	51.1845	1.5398	1.95792	1.61879	-0.317042	0.564712	8562
(1694835,1704055)(1850185,1860185)(1850185,1860185)	NC_044998.1	1855185	39.5543	53.0644	16.0221	70.525	61.7947	1.38667	1.65815	1.32441	-0.422998	0.582869	9220
(1704056,1712601)(1860186,1870186)(1860186,1870186)	NC_044998.1	1865186	32.5459	42.68	16.9164	58.0912	50.3856	1.25994	1.39083	1.05945	-0.453092	0.566713	8545
(1712602,1722284)(1870187,1880187)(1870187,1880187)	NC_044998.1	1875187	39.9755	59.2809	12.9323	62.8034	61.0422	1.96096	2.05366	1.50664	-0.084441	0.546364	9682
(1722285,1732104)(1880188,1890188)(1880188,1890188)	NC_044998.1	1885188	32.4087	43.2595	20.5023	49.833	46.5462	1.35465	1.2335	0.810324	-0.194072	0.450979	9819
(1732105,1741779)(1890189,1900189)(1890189,1900189)	NC_044998.1	1895189	32.0053	41.6089	15.1001	50.9569	46.2829	1.21377	1.45416	1.16429	-0.279437	0.4611	9674
(1741780,1750836)(1900190,1910190)(1900190,1910190)	NC_044998.1	1905190	24.6082	28.8703	16.402	40.2808	34.5755	0.696599	0.878021	0.723998	-0.442521	0.41676	9056
(1750837,1760017)(1910191,1920191)(1910191,1920191)	NC_044998.1	1915191	51.0661	63.7123	30.6136	74.6694	69.1908	1.00893	1.15709	0.900213	-0.205918	0.368956	9180
(1760018,1769755)(1920192,1930234)(1920192,1930192)	NC_044998.1	1925192	37.5985	54.4636	16.1075	60.1587	57.3112	1.81961	1.80289	1.26965	-0.145095	0.543151	9737
(1769755,1778736)(1930234,1940193)(1930193,1940193)	NC_044998.1	1935193	26.4514	34.7202	12.9641	51.6656	43.1929	1.25945	1.43088	1.11203	-0.611837	0.652117	8981
(1778737,1787693)(1940194,1950357)(1940194,1950194)	NC_044998.1	1945194	27.909	36.7584	13.8239	53.2478	45.0031	1.27904	1.43353	1.10417	-0.564573	0.631685	8956
(1787693,1796962)(1950357,1960195)(1950195,1960195)	NC_044998.1	1955195	39.1593	49.3656	26.6408	64.3731	56.8693	1.05796	1.02713	0.711356	-0.367212	0.468761	9269
(1796963,1806876)(1960196,1970196)(1960196,1970196)	NC_044998.1	1965196	37.2343	48.9383	23.3224	65.8865	57.4124	1.27492	1.21537	0.829568	-0.435987	0.561342	9913
(1806877,1816570)(1970197,1980197)(1970197,1980197)	NC_044998.1	1975197	31.1433	39.9067	17.7583	54.5523	47.2295	1.13763	1.24708	0.946024	-0.449811	0.533665	9693
(1816571,1824159)(1980198,1990198)(1980198,1990198)	NC_044998.1	1985198	27.9773	37.3693	12.865	56.5011	46.9352	1.35421	1.52809	1.18197	-0.65346	0.698874	7588
(1824160,1832301)(1990199,2000199)(1990199,2000199)	NC_044998.1	1995199	20.0907	22.6585	12.2018	43.1062	32.8824	0.511238	0.890853	0.840381	-0.968981	0.652254	8141
(1832302,1841578)(2000200,2010200)(2000200,2010200)	NC_044998.1	2005200	23.5175	26.7137	14.4861	53.0756	39.8946	0.54601	0.898691	0.831264	-1.06925	0.715885	9276
(1841579,1850736)(2010201,2020201)(2010201,2020201)	NC_044998.1	2015201	24.8999	24.3144	20.3055	55.7438	40.0291	-0.094607	0.279185	0.400903	-1.20476	0.625323	9157
(1850737,1860257)(2020202,2030202)(2020202,2030202)	NC_044998.1	2025202	27.4643	28.7971	22.281	61.0643	44.9307	0.195683	0.413554	0.412531	-1.1225	0.655704	9520
(1860258,1870155)(2030203,2040203)(2030203,2040203)	NC_044998.1	2035203	22.6968	14.1388	32.068	71.7065	42.9226	-1.51342	-1.36254	-0.891576	-2.41842	0.915414	9897
(1870156,1879033)(2040204,2050204)(2040204,2050204)	NC_044998.1	2045204	23.696	21.2575	23.3415	54.5049	37.8812	-0.413504	-0.152079	0.032399	-1.33848	0.615491	8877
(1879034,1888882)(2050205,2060205)(2050205,2060205)	NC_044998.1	2055205	25.7196	24.0393	23.8457	61.832	42.9356	-0.263043	0.013076	0.158625	-1.40298	0.689327	9848
(1888883,1898742)(2060206,2070206)(2060206,2070206)	NC_044998.1	2065206	25.4304	24.866	16.2582	55.7446	40.3053	-0.089332	0.587631	0.784705	-1.15922	0.602235	9859
(1898743,1907941)(2070207,2080207)(2070207,2080207)	NC_044998.1	2075207	43.8738	54.7172	19.7767	89.1364	71.9268	1.00493	1.41513	1.2278	-0.752239	0.663631	9198
(1907942,1917782)(2080208,2090208)(2080208,2090208)	NC_044998.1	2085208	37.6366	45.5996	9.11167	84.1789	64.8893	0.85829	1.71341	1.68358	-0.981902	0.750151	9840
(1917783,1926249)(2090209,2100209)(2090209,2100209)	NC_044998.1	2095209	30.1468	35.7695	12.545	53.2958	44.5327	0.753563	1.34889	1.28295	-0.555923	0.492778	8466
(1926250,1935090)(2100210,2110210)(2100210,2110210)	NC_044998.1	2105210	36.2801	39.9077	12.7965	65.0274	52.4676	0.405374	1.31882	1.43548	-0.663067	0.46201	8840
(1935091,1944873)(2110211,2120211)(2110211,2120211)	NC_044998.1	2115211	34.6017	41.0396	11.2761	49.5176	45.2786	0.753687	1.51519	1.49168	-0.23456	0.319304	9782
(1944874,1954630)(2120212,2130212)(2120212,2130212)	NC_044998.1	2125212	37.6478	41.3799	17.3697	62.8825	52.1312	0.402138	1.12715	1.1965	-0.547111	0.398547	9756
(1954631,1964202)(2130213,2140213)(2130213,2140213)	NC_044998.1	2135213	44.425	48.217	20.8725	70.9653	59.5912	0.347137	1.09419	1.18572	-0.491038	0.354375	9571
(1964203,1973966)(2140214,2150214)(2140214,2150214)	NC_044998.1	2145214	42.2997	51.3334	19.6351	62.4836	56.9085	0.867909	1.32997	1.19607	-0.252702	0.358301	9763
(1973967,1983655)(2150215,2160215)(2150215,2160215)	NC_044998.1	2155215	35.542	42.8143	7.64937	60.8858	51.8501	0.829235	1.7447	1.73875	-0.486851	0.474983	9688
(1983656,1992595)(2160216,2170216)(2160216,2170216)	NC_044998.1	2165216	27.7478	31.987	8.51337	49.9314	40.9592	0.61619	1.47532	1.5161	-0.617922	0.49099	8939
(1992596,2002177)(2170217,2180217)(2170217,2180217)	NC_044998.1	2175217	35.4767	40.6047	17.7399	61.0228	50.8137	0.585779	1.13644	1.1076	-0.551074	0.447511	9581
(2002178,2011257)(2180218,2190218)(2180218,2190218)	NC_044998.1	2185218	44.3718	52.1521	16.9215	69.0547	60.6034	0.713071	1.41138	1.38355	-0.365288	0.379717	9079
(2011258,2019706)(2190219,2200219)(2190219,2200219)	NC_044998.1	2195219	27.7647	32.8059	12.2564	54.2335	43.5197	0.732326	1.29079	1.22169	-0.737426	0.585171	8448
(2019707,2029571)(2200220,2210220)(2200220,2210220)	NC_044998.1	2205220	47.1585	55.421	19.8955	74.9748	65.1979	0.713099	1.34168	1.29583	-0.397755	0.39733	9864
(2029572,2039424)(2210221,2220221)(2210221,2220221)	NC_044998.1	2215221	33.6354	36.5306	21.5916	53.7746	45.1526	0.348507	0.781442	0.791242	-0.490686	0.354188	9852
(2039425,2048708)(2220222,2230222)(2220222,2230222)	NC_044998.1	2225222	36.4531	42.6421	10.3073	64.0897	53.3659	0.688365	1.56575	1.59098	-0.563467	0.480448	9283
(2048709,2058610)(2230223,2240223)(2230223,2240223)	NC_044998.1	2235223	40.4652	44.4835	16.125	64.8221	54.6528	0.403299	1.24187	1.34032	-0.481702	0.363557	9901
(2058611,2068223)(2240224,2250224)(2240224,2250224)	NC_044998.1	2245224	34.6662	41.5705	8.69663	68.3043	54.9374	0.80681	1.67055	1.65782	-0.738271	0.605118	9612
(2068224,2077454)(2250225,2260225)(2250225,2260225)	NC_044998.1	2255225	37.9538	45.9548	9.82293	72.4084	59.1816	0.855295	1.68304	1.64705	-0.667697	0.579492	9230
(2077455,2087209)(2260226,2270226)(2260226,2270226)	NC_044998.1	2265226	39.6659	51.4449	2.07163	67.8718	59.6583	1.20565	2.20414	2.11013	-0.396841	0.522499	9754
(2087210,2096806)(2270227,2280227)(2270227,2280227)	NC_044998.1	2275227	36.62	44.3395	7.46137	80.357	62.3483	0.854759	1.77794	1.76659	-0.941965	0.72759	9596
(2096807,2105770)(2280228,2290228)(2280228,2290228)	NC_044998.1	2285228	37.8397	42.9358	5.46084	70.6333	56.7846	0.546389	1.75067	1.90123	-0.701188	0.518712	8963
(2105771,2114662)(2290229,2300229)(2290229,2300229)	NC_044998.1	2295229	36.3048	47.5064	3.44105	60.68	54.0932	1.25089	2.14215	2.00756	-0.347498	0.507358	8891
(2114663,2124190)(2300230,2310230)(2300230,2310230)	NC_044998.1	2305230	43.9426	56.2936	3.77635	61.9325	59.113	1.14288	2.12379	2.04348	-0.123047	0.358322	9527
(2124191,2132984)(2310231,2320231)(2310231,2320231)	NC_044998.1	2315231	28.1887	34.5507	5.1905	32.574	33.5623	0.910593	1.81785	1.78604	0.067016	0.196637	8793
(2132985,2141633)(2320232,2330232)(2320232,2330232)	NC_044998.1	2325232	41.0271	51.7424	1.53744	64.999	58.3707	1.06092	2.1695	2.14598	-0.309698	0.438412	8648
(2141634,2151020)(2330233,2340233)(2330233,2340233)	NC_044998.1	2335233	33.2994	37.9777	1.43859	47.2009	42.5893	0.56872	1.92979	2.11325	-0.265075	0.288531	9386
(2151021,2160211)(2340234,2350234)(2340234,2350234)	NC_044998.1	2345234	28.3777	31.7167	4.92148	42.3307	37.0237	0.474791	1.64853	1.81017	-0.357461	0.314309	9190
(2160212,2169807)(2350235,2360235)(2350235,2360235)	NC_044998.1	2355235	35.6619	45.7791	2.49089	52.0834	48.9313	1.14982	2.1408	2.06116	-0.169275	0.385199	9595
(2169808,2179474)(2360236,2370236)(2360236,2370236)	NC_044998.1	2365236	42.2323	53.791	3.5369	68.6083	61.1997	1.11225	2.11176	2.04519	-0.336343	0.465935	9666
(2179475,2188372)(2370237,2380237)(2370237,2380237)	NC_044998.1	2375237	36.8533	45.8288	11.4434	49.9093	47.8691	0.987632	1.64766	1.53016	-0.106048	0.309576	8897
(2188373,2196870)(2380238,2390238)(2380238,2390238)	NC_044998.1	2385238	34.0739	45.124	6.26254	42.4768	43.8004	1.31332	2.00773	1.80476	0.074364	0.295324	8497
(2196871,2206433)(2390239,2401823)(2390239,2400239)	NC_044998.1	2395239	33.7456	46.7581	4.57124	51.7124	49.2352	1.56133	2.19984	1.91073	-0.140519	0.474817	9562
(2206433,2214695)(2401823,2410240)(2400240,2410240)	NC_044998.1	2405240	33.5168	41.929	9.80001	59.226	50.5775	1.01612	1.68633	1.56337	-0.493919	0.526494	8262
(2214696,2222487)(2410241,2420350)(2410241,2420241)	NC_044998.1	2415241	34.6214	46.6681	3.52389	64.5877	55.6279	1.40953	2.19518	1.98762	-0.495495	0.627869	7791
(2222487,2231867)(2420350,2430781)(2420242,2430242)	NC_044998.1	2425242	31.5259	42.8983	1.31167	47.694	45.2961	1.45874	2.31441	2.11091	-0.145519	0.451372	9380
(2231867,2240532)(2430781,2440243)(2430243,2440243)	NC_044998.1	2435243	31.296	44.6851	1.4996	48.5081	46.5966	1.72981	2.42026	2.09621	-0.116848	0.505165	8665
(2240533,2250359)(2440244,2450244)(2440244,2450244)	NC_044998.1	2445244	33.4179	46.1143	1.51835	56.1667	51.1405	1.53807	2.34731	2.10868	-0.287892	0.548517	9826
(2250360,2260094)(2450245,2460245)(2450245,2460245)	NC_044998.1	2455245	27.8467	35.3859	3.69996	41.9145	38.6502	1.09204	1.98474	1.89693	-0.224024	0.4001	9734
(2260095,2270035)(2460246,2470246)(2460246,2470246)	NC_044998.1	2465246	30.3965	35.1159	16.1178	58.9275	47.0217	0.627402	1.09477	1.03265	-0.749133	0.564877	9940
(2270036,2279754)(2470247,2480247)(2470247,2480247)	NC_044998.1	2475247	29.0268	32.4772	13.5286	56.6194	44.5483	0.479892	1.14097	1.17078	-0.795051	0.551849	9718
(2279755,2289262)(2480248,2490248)(2480248,2490248)	NC_044998.1	2485248	44.5434	50.3276	17.1101	78.4988	64.4132	0.528117	1.32578	1.37757	-0.606487	0.463058	9507
(2289263,2298432)(2490249,2500249)(2490249,2500249)	NC_044998.1	2495249	37.8887	41.6215	19.0699	64.5539	53.0877	0.399704	1.0522	1.10365	-0.579806	0.415615	9169
(2298433,2306855)(2500250,2510250)(2500250,2510250)	NC_044998.1	2505250	31.7827	35.9673	17.0703	58.7595	47.3634	0.532512	1.04355	1.02	-0.68605	0.506654	8422
(2306856,2316509)(2510251,2520645)(2510251,2520251)	NC_044998.1	2515251	34.0196	39.2056	14.0717	47.591	43.3983	0.617331	1.30049	1.29644	-0.235936	0.285211	9653
(2316509,2326019)(2520645,2530252)(2520252,2530252)	NC_044998.1	2525252	32.3347	40.0753	10.1114	62.277	51.1761	0.968531	1.62768	1.51576	-0.656963	0.602386	9510
(2326020,2335677)(2530253,2540253)(2530253,2540253)	NC_044998.1	2535253	36.8737	49.1409	22.2543	60.5799	54.8604	1.34911	1.28766	0.879902	-0.297121	0.505206	9657
(2335678,2345156)(2540254,2550254)(2540254,2550254)	NC_044998.1	2545254	45.0829	46.6855	40.9049	71.0328	58.8592	0.144601	0.228044	0.207381	-0.517927	0.317251	9478
(2345157,2354776)(2550255,2560255)(2550255,2560255)	NC_044998.1	2555255	23.8613	30.3015	13.7851	44.3884	37.345	1.08474	1.19742	0.914958	-0.563229	0.581085	9619
(2354777,2364544)(2560256,2570256)(2560256,2570256)	NC_044998.1	2565256	26.3268	27.3714	26.5142	49.0846	38.228	0.159842	0.05663	-0.015519	-0.787659	0.465733	9767
(2364545,2373822)(2570257,2580257)(2570257,2580257)	NC_044998.1	2575257	39.4928	50.8034	18.3699	75.4336	63.1185	1.1627	1.45403	1.19059	-0.59761	0.620128	9277
(2373823,2383690)(2580258,2590259)(2580258,2590258)	NC_044998.1	2585258	28.7652	34.5859	14.1138	61.863	48.2245	0.816763	1.24337	1.11631	-0.906385	0.698037	9867
(2383690,2393414)(2590259,2600259)(2590259,2600259)	NC_044998.1	2595259	33.5142	38.8762	18.5429	48.3461	43.6111	0.647721	1.06729	0.986956	-0.270437	0.311614	9724
(2393415,2400541)(2600260,2610260)(2600260,2610260)	NC_044998.1	2605260	29.5229	37.5118	9.08926	46.1113	41.8116	1.09284	1.68403	1.5191	-0.278482	0.429688	7126
(2400542,2408813)(2610261,2620261)(2610261,2620261)	NC_044998.1	2615261	33.4566	37.2448	17.3731	61.7822	49.5135	0.458384	1.04479	1.06201	-0.70192	0.496393	8271
(2408814,2418626)(2620262,2630262)(2620262,2630262)	NC_044998.1	2625262	32.7467	37.1243	17.2021	62.9508	50.0375	0.54097	1.06917	1.04757	-0.754684	0.545956	9812
(2418627,2427556)(2630263,2640263)(2630263,2640263)	NC_044998.1	2635263	29.0513	35.5314	14.761	47.2143	41.3728	0.900528	1.24966	1.07867	-0.38442	0.437715	8929
(2427557,2437278)(2640264,2650264)(2640264,2650264)	NC_044998.1	2645264	29.2601	28.8397	19.32	51.5469	40.1933	-0.058014	0.568862	0.745246	-0.741885	0.385669	9721
(2437279,2447139)(2650265,2660265)(2650265,2660265)	NC_044998.1	2655265	27.4204	29.6297	22.42	47.3531	38.4914	0.324875	0.458269	0.398575	-0.617532	0.416269	9860
(2447140,2456348)(2660266,2670266)(2660266,2670266)	NC_044998.1	2665266	34.107	37.4442	26.7732	69.68	53.5621	0.396244	0.550789	0.475475	-0.904697	0.590142	9208
(2456349,2465691)(2670267,2680267)(2670267,2680267)	NC_044998.1	2675267	35.8194	43.2184	20.3143	44.2025	43.7104	0.837257	1.12793	0.959406	-0.026308	0.228075	9342
(2465692,2475388)(2680268,2690268)(2680268,2690268)	NC_044998.1	2685268	32.2961	38.2874	12.8376	61.0155	49.6514	0.750526	1.38405	1.32869	-0.673335	0.555524	9696
(2475389,2485266)(2690269,2700269)(2690269,2700269)	NC_044998.1	2695269	37.672	42.6399	21.7077	62.55	52.595	0.534969	0.982051	0.941389	-0.506271	0.410386	9877
(2485267,2494510)(2700270,2710270)(2700270,2710270)	NC_044998.1	2705270	46.8871	60.6677	18.2412	76.4361	68.5519	1.19615	1.6113	1.36916	-0.322599	0.479917	9243
(2494511,2504163)(2710271,2720881)(2710271,2720271)	NC_044998.1	2715271	41.1609	46.478	20.987	66.8323	56.6552	0.524757	1.09809	1.09289	-0.473979	0.390407	9652
(2504163,2513408)(2720881,2730272)(2720272,2730272)	NC_044998.1	2725272	41.2005	53.6476	17.8312	69.813	61.7303	1.22729	1.54145	1.26482	-0.376074	0.516799	9245
(2513409,2522392)(2730273,2740273)(2730273,2740273)	NC_044998.1	2735273	35.2977	46.1815	14.7617	56.0513	51.1164	1.24948	1.56924	1.2886	-0.267722	0.463875	8983
(2522393,2531724)(2740274,2750274)(2740274,2750274)	NC_044998.1	2745274	41.2872	51.3227	17.4896	59.3858	55.3542	0.987457	1.45314	1.28541	-0.187189	0.353376	9331
(2531725,2541258)(2750275,2760275)(2750275,2760275)	NC_044998.1	2755275	39.6765	45.5094	24.0957	66.161	55.8352	0.59687	0.955714	0.874314	-0.49877	0.422193	9533
(2541259,2550464)(2760276,2770343)(2760276,2770276)	NC_044998.1	2765276	43.7125	47.9707	26.2903	89.5258	68.7483	0.396071	0.881214	0.890848	-0.911526	0.594414	9205
(2550464,2559434)(2770343,2780277)(2770277,2780277)	NC_044998.1	2775277	41.4042	49.7835	27.8313	68.7748	59.2792	0.822201	0.940283	0.731145	-0.439655	0.44778	8970
(2559435,2568237)(2780278,2790300)(2780278,2790278)	NC_044998.1	2785278	24.1399	29.005	9.42162	55.2881	42.1466	0.810222	1.40432	1.32207	-1.03887	0.767226	8802
(2568237,2574269)(2790300,2800279)(2790279,2800279)	NC_044998.1	2795279	18.7925	19.2455	14.0081	36.7306	27.9881	0.096235	0.47485	0.542004	-0.885029	0.500461	6032
(2574270,2584103)(2800280,2810280)(2800280,2810280)	NC_044998.1	2805280	22.4663	28.7214	3.09316	46.3159	37.5186	1.11721	1.9664	1.86073	-0.746639	0.688101	9833
(2584104,2593162)(2810281,2820281)(2810281,2820281)	NC_044998.1	2815281	21.2087	31.2035	1.85579	42.4072	36.8054	1.88802	2.37682	1.96089	-0.503285	0.75431	9058
(2593163,2602940)(2820282,2830282)(2820282,2830282)	NC_044998.1	2825282	30.5752	36.5432	27.0123	59.1661	47.8546	0.788855	0.546157	0.256244	-0.707616	0.583734	9777
(2602941,2612681)(2830283,2840283)(2830283,2840283)	NC_044998.1	2835283	25.9573	28.665	31.6344	40.3108	34.4879	0.420085	-0.19882	-0.476442	-0.428414	0.338494	9740
(2612682,2618366)(2840284,2850284)(2840284,2850284)	NC_044998.1	2845284	21.9686	19.5142	26.6365	53.5776	36.5459	-0.448042	-0.558102	-0.457773	-1.47787	0.681153	5684
(2618367,2627666)(2850285,2860285)(2850285,2860285)	NC_044998.1	2855285	32.7844	41.7728	17.1109	57.6254	49.6991	1.10953	1.32209	1.05509	-0.462706	0.533478	9299
(2627667,2637006)(2860286,2870286)(2860286,2870286)	NC_044998.1	2865286	30.6651	34.5656	31.9593	60.6607	47.6131	0.514091	0.148932	-0.092825	-0.81385	0.570887	9339
(2637007,2646451)(2870287,2880287)(2870287,2880287)	NC_044998.1	2875287	45.3112	55.8365	21.9831	89.367	72.6017	0.944923	1.32899	1.15232	-0.709707	0.625334	9444
(2646452,2655410)(2880288,2890288)(2880288,2890288)	NC_044998.1	2885288	31.9785	33.6775	16.5352	55.0279	44.3527	0.214911	0.941112	1.06445	-0.63875	0.399959	8958
(2655411,2665004)(2890289,2900289)(2890289,2900289)	NC_044998.1	2895289	28.967	36.6155	6.3661	57.5915	47.1035	1.06592	1.825	1.71066	-0.692197	0.646131	9593
(2665005,2674003)(2900290,2910290)(2900290,2910290)	NC_044998.1	2905290	42.8737	51.2333	6.77338	64.1241	57.6787	0.79255	1.84127	1.88061	-0.288263	0.358308	8998
(2674004,2683736)(2910291,2920291)(2910291,2920291)	NC_044998.1	2915291	34.1854	38.4367	10.239	58.1228	48.2797	0.503651	1.45224	1.54913	-0.551233	0.426566	9732
(2683737,2693225)(2920292,2930292)(2920292,2930292)	NC_044998.1	2925292	35.6972	44.9868	12.1855	75.197	60.0919	1.05473	1.62064	1.45958	-0.81036	0.707466	9488
(2693226,2702199)(2930293,2940293)(2930293,2940293)	NC_044998.1	2935293	38.1779	43.6746	23.5986	74.3959	59.0352	0.584187	0.929862	0.84882	-0.770897	0.566078	8973
(2702200,2711912)(2940294,2950294)(2940294,2950294)	NC_044998.1	2945294	30.6	34.3704	13.1313	63.1676	48.769	0.497972	1.21614	1.25541	-0.900016	0.613293	9712
(2711913,2721025)(2950295,2960295)(2950295,2960295)	NC_044998.1	2955295	40.467	55.1388	15.8341	71.6487	63.3938	1.47246	1.72115	1.35638	-0.391004	0.58747	9112
(2721026,2729696)(2960296,2970296)(2960296,2970296)	NC_044998.1	2965296	21.3396	23.7396	15.9191	41.3195	32.5295	0.450661	0.629731	0.546098	-0.784925	0.537941	8670
(2729697,2739482)(2970297,2980297)(2970297,2980297)	NC_044998.1	2975297	31.3883	39.6883	11.9238	57.0437	48.366	1.06922	1.55164	1.36554	-0.52891	0.55891	9785
(2739483,2748799)(2980298,2990298)(2980298,2990298)	NC_044998.1	2985298	32.12	41.3199	2.41024	64.79	53.055	1.15867	2.12714	2.03923	-0.699098	0.673723	9316
(2748800,2758134)(2990299,3000299)(2990299,3000299)	NC_044998.1	2995299	29.0568	36.823	4.19528	45.3099	41.0664	1.07905	1.9627	1.87628	-0.279203	0.426554	9334
(2758135,2767188)(3000300,3010300)(3000300,3010300)	NC_044998.1	3005300	35.1046	45.1476	14.7234	55.6805	50.414	1.15919	1.52754	1.28559	-0.287268	0.451378	9053
(2767189,2776657)(3010301,3020301)(3010301,3020301)	NC_044998.1	3015301	37.7496	43.4939	20.2416	56.7347	50.1143	0.617314	1.08874	1.03039	-0.335999	0.339341	9468
(2776658,2786323)(3020302,3030302)(3020302,3030302)	NC_044998.1	3025302	29.4723	32.6957	22.2101	47.8482	40.2719	0.441685	0.622285	0.540771	-0.491528	0.378262	9665
(2786324,2795931)(3030303,3040303)(3030303,3040303)	NC_044998.1	3035303	36.7843	45.8829	17.4102	65.1133	55.4981	1.00303	1.36681	1.16878	-0.5007	0.526889	9607
(2795932,2805655)(3040304,3050304)(3040304,3050304)	NC_044998.1	3045304	36.7908	46.3804	21.165	66.1043	56.2424	1.05697	1.21023	0.942499	-0.513462	0.547564	9723
(2805656,2815178)(3050305,3060305)(3050305,3060305)	NC_044998.1	3055305	35.726	42.6721	19.8356	75.7354	59.2037	0.788032	1.12743	0.9857	-0.88618	0.680332	9522
(2815179,2824595)(3060306,3070306)(3060306,3070306)	NC_044998.1	3065306	35.1947	45.2452	13.3249	74.906	60.0756	1.15714	1.59872	1.37613	-0.806896	0.731725	9416
(2824596,2834226)(3070307,3080307)(3070307,3080307)	NC_044998.1	3075307	36.9634	51.9571	15.1886	64.687	58.3221	1.64503	1.75681	1.30753	-0.329854	0.59848	9630
(2834227,2843438)(3080308,3090330)(3080308,3090308)	NC_044998.1	3085308	24.3647	34.1441	6.81283	56.9524	45.5483	1.61395	1.94284	1.56299	-0.893294	0.89442	9211
(2843438,2852902)(3090330,3100309)(3090309,3100309)	NC_044998.1	3095309	29.7985	30.9816	21.4365	74.067	52.5243	0.16037	0.560559	0.616225	-1.38247	0.787404	9464
(2852903,2861857)(3100310,3110789)(3100310,3110310)	NC_044998.1	3105310	30.9965	41.3473	13.4846	58.2455	49.7964	1.34994	1.57592	1.24325	-0.521431	0.6266	8954
(2861857,2869276)(3110789,3120311)(3110311,3120311)	NC_044998.1	3115311	25.1888	36.1214	6.98527	48.0228	42.0721	1.74666	2.00707	1.57134	-0.451031	0.689978	7419
(2869277,2878082)(3120312,3131147)(3120312,3130312)	NC_044998.1	3125312	26.7125	37.2851	10.6513	43.682	40.4835	1.59498	1.73545	1.31208	-0.228734	0.531266	8805
(2878082,2885885)(3131147,3140313)(3130313,3140313)	NC_044998.1	3135313	26.758	36.6581	9.9755	50.771	43.7146	1.49104	1.73583	1.36882	-0.503781	0.653063	7803
(2885886,2895676)(3140314,3150314)(3140314,3150314)	NC_044998.1	3145314	29.6917	39.3595	12.1544	44.3382	41.8488	1.31514	1.60316	1.29677	-0.16032	0.422714	9790
(2895677,2904678)(3150315,3160315)(3150315,3160315)	NC_044998.1	3155315	30.6616	38.7541	11.3106	56.1352	47.4446	1.06671	1.56839	1.38803	-0.542136	0.565388	9001
(2904679,2913125)(3160316,3170316)(3160316,3170316)	NC_044998.1	3165316	36.268	51.8599	6.5982	68.1345	59.9972	1.7429	2.20246	1.8142	-0.429732	0.677482	8446
(2913126,2922824)(3170317,3180317)(3170317,3180317)	NC_044998.1	3175317	36.7628	50.2037	14.403	55.2909	52.7473	1.48258	1.71954	1.34965	-0.132532	0.450305	9698
(2922825,2932455)(3180318,3190318)(3180318,3190318)	NC_044998.1	3185318	43.8203	63.2636	16.4357	73.7433	68.5034	1.80411	1.89882	1.39694	-0.229314	0.584617	9630
(2932456,2942116)(3190319,3200319)(3190319,3200319)	NC_044998.1	3195319	38.3971	51.674	9.9637	73.6009	62.6375	1.40315	1.92129	1.64638	-0.547098	0.654189	9660
(2942117,2950684)(3200320,3210320)(3200320,3210320)	NC_044998.1	3205320	32.5164	43.9926	6.4121	57.7299	50.8612	1.42806	2.03051	1.77102	-0.404241	0.583278	8567
(2950685,2959965)(3210321,3220519)(3210321,3220321)	NC_044998.1	3215321	36.4838	38.2739	24.6241	49.1936	43.7338	0.198938	0.660431	0.721084	-0.286642	0.205782	9280
(2959965,2969545)(3220519,3230322)(3220322,3230322)	NC_044998.1	3225322	41.024	48.9724	7.95943	86.6403	67.8063	0.787033	1.77242	1.79695	-0.880055	0.677057	9580
(2969546,2979340)(3230323,3240323)(3230323,3240323)	NC_044998.1	3235323	40.0649	50.1018	9.40457	72.2636	61.1827	1.01727	1.79938	1.70451	-0.530092	0.546484	9794
(2979341,2988253)(3240324,3250326)(3240324,3250324)	NC_044998.1	3245324	34.356	37.4144	17.4638	66.5455	51.9799	0.360558	1.02261	1.08762	-0.811684	0.530778	8912
(2988253,2997411)(3250326,3260325)(3250325,3260325)	NC_044998.1	3255325	39.3295	42.7758	10.9697	80.3292	61.5525	0.355712	1.4316	1.60484	-0.914928	0.5857	9158
(2997412,3006708)(3260326,3270501)(3260326,3270326)	NC_044998.1	3265326	39.5493	51.4873	2.51862	62.7082	57.0978	1.22547	2.19229	2.08436	-0.271869	0.459962	9296
(3006708,3016411)(3270501,3280327)(3270327,3280327)	NC_044998.1	3275327	39.6456	55.104	2.98979	77.9024	66.5032	1.58305	2.32765	2.05846	-0.551046	0.702275	9703
(3016412,3025752)(3280328,3290328)(3280328,3290328)	NC_044998.1	3285328	36.9466	49.8395	2.30241	53.0309	51.4352	1.41517	2.27233	2.08121	-0.082732	0.406159	9340
(3025753,3035590)(3290329,3300329)(3290329,3300329)	NC_044998.1	3295329	27.2971	34.9156	1.23709	45.4594	40.1875	1.12526	2.14987	2.08601	-0.369015	0.486829	9837
(3035591,3045346)(3300330,3310330)(3300330,3310330)	NC_044998.1	3305330	29.0559	36.9045	1.14959	51.0051	43.9548	1.09055	2.15089	2.10613	-0.463901	0.529194	9755
(3045347,3055122)(3310331,3320331)(3310331,3320331)	NC_044998.1	3315331	30.8214	38.2782	7.63071	50.8273	44.5528	0.977924	1.74283	1.65528	-0.389408	0.460223	9775
(3055123,3064911)(3320332,3330332)(3320332,3330332)	NC_044998.1	3325332	32.8832	40.5444	16.5075	38.4143	39.4794	0.942899	1.28487	1.09922	0.061988	0.207421	9788
(3064912,3074757)(3330333,3340333)(3330333,3340333)	NC_044998.1	3335333	37.5679	51.5552	11.9468	78.7439	65.1496	1.51033	1.86321	1.51483	-0.693251	0.760579	9845
(3074758,3084562)(3340334,3350334)(3340334,3350334)	NC_044998.1	3345334	34.7813	43.7594	10.4859	58.9538	51.3566	1.04574	1.68549	1.54605	-0.418226	0.493177	9804
(3084563,3094449)(3350335,3360335)(3350335,3360335)	NC_044998.1	3355335	25.1987	35.0416	7.52343	39.8238	37.4327	1.57197	1.89492	1.52518	-0.18116	0.499783	9886
(3094450,3103831)(3360336,3370338)(3360336,3370336)	NC_044998.1	3365336	25.5997	36.1923	3.26157	41.9051	39.0487	1.66582	2.23401	1.89923	-0.213061	0.540972	9381
(3103831,3112974)(3370338,3380337)(3370337,3380337)	NC_044998.1	3375337	31.2306	42.5877	2.64705	52.6362	47.6119	1.4703	2.24288	2.01487	-0.307766	0.541962	9143
(3112975,3122878)(3380338,3390338)(3380338,3390338)	NC_044998.1	3385338	34.4839	48.4622	5.04664	52.9132	50.6877	1.64195	2.21744	1.88864	-0.123562	0.486227	9903
(3122879,3132754)(3390339,3400339)(3390339,3400339)	NC_044998.1	3395339	38.3106	50.7318	4.65897	72.3647	61.5483	1.31563	2.12685	1.95274	-0.540971	0.628523	9875
(3132755,3142644)(3400340,3410340)(3400340,3410340)	NC_044998.1	3405340	19.2532	28.7602	4.28452	30.71	29.7351	1.97261	2.16962	1.65838	-0.096364	0.557153	9889
(3142645,3152519)(3410341,3420341)(3410341,3420341)	NC_044998.1	3415341	37.9498	53.112	9.11947	60.2339	56.673	1.62097	2.0494	1.68818	-0.179778	0.511169	9874
(3152520,3162270)(3420342,3430342)(3420342,3430342)	NC_044998.1	3425342	46.4139	56.0854	11.625	64.4122	60.2488	0.847925	1.70522	1.6791	-0.172081	0.309561	9750
(3162271,3171259)(3430343,3440343)(3430343,3440343)	NC_044998.1	3435343	45.4734	56.0566	13.1705	69.8447	62.9506	0.946789	1.67778	1.59016	-0.290803	0.399061	8988
(3171260,3180617)(3440344,3450344)(3440344,3450344)	NC_044998.1	3445344	39.9677	53.5295	7.04461	65.9494	59.7394	1.37781	2.06009	1.83457	-0.297793	0.51288	9357
(3180618,3189657)(3450345,3462988)(3450345,3460345)	NC_044998.1	3455345	37.8615	43.7359	13.4337	66.9143	55.3251	0.629461	1.4148	1.43357	-0.586448	0.47788	9039
(3189657,3195940)(3462988,3470346)(3460346,3470346)	NC_044998.1	3465346	25.7744	33.3883	3.30317	46.1203	39.7543	1.18945	2.02787	1.8984	-0.471658	0.558583	6283
(3195941,3204838)(3470347,3480347)(3470347,3480347)	NC_044998.1	3475347	40.227	50.7407	5.88296	60.7055	55.7231	1.06136	1.97562	1.90193	-0.237396	0.399409	8897
(3204839,3213773)(3480348,3490348)(3480348,3490348)	NC_044998.1	3485348	43.2664	51.4597	7.54428	65.8676	58.6636	0.76983	1.80276	1.84468	-0.319282	0.369296	8934
(3213774,3223465)(3490349,3500349)(3490349,3500349)	NC_044998.1	3495349	46.9691	55.7777	11.2777	72.8304	64.304	0.763261	1.68718	1.70303	-0.348267	0.383338	9691
(3223466,3232473)(3500350,3510350)(3500350,3510350)	NC_044998.1	3505350	43.5157	51.2047	23.1563	68.7797	59.9922	0.718372	1.14503	1.04556	-0.387248	0.392945	9007
(3232474,3242310)(3510351,3520351)(3510351,3520351)	NC_044998.1	3515351	43.5687	55.9952	19.0314	67.9404	61.9678	1.15959	1.50721	1.25865	-0.262882	0.438268	9836
(3242311,3250978)(3520352,3530352)(3520352,3530352)	NC_044998.1	3525352	32.3696	37.8689	17.1608	54.4578	46.1633	0.687368	1.12374	1.03627	-0.49035	0.440536	8667
(3250979,3259450)(3530353,3540364)(3530353,3540353)	NC_044998.1	3535353	40.2684	50.03	17.4056	69.7697	59.8999	0.984433	1.43541	1.26486	-0.469788	0.505483	8471
(3259450,3266057)(3540364,3550437)(3540354,3550354)	NC_044998.1	3545354	22.4664	30.6864	2.38871	38.5679	34.6272	1.46816	2.17122	1.92839	-0.334457	0.555914	6607
(3266057,3274862)(3550437,3560355)(3550355,3560355)	NC_044998.1	3555355	39.4198	51.105	4.64656	73.863	62.484	1.20339	2.08649	1.96345	-0.553201	0.606496	8805
(3274863,3284650)(3560356,3570356)(3560356,3570356)	NC_044998.1	3565356	42.6092	48.6011	30.553	78.5046	63.5528	0.571552	0.751928	0.631797	-0.672823	0.509985	9787
(3284651,3294507)(3570357,3580357)(3570357,3580357)	NC_044998.1	3575357	44.9258	43.1104	42.5803	69.538	56.3242	-0.164361	0.020984	0.116817	-0.564137	0.263399	9856
(3294508,3304190)(3580358,3590358)(3580358,3590358)	NC_044998.1	3585358	56.8149	57.932	61.8729	73.3509	65.6414	0.080202	-0.124188	-0.200778	-0.260586	0.161654	9682
(3304191,3313405)(3590359,3600359)(3590359,3600359)	NC_044998.1	3595359	34.3064	41.9134	31.0359	51.6354	46.7744	0.898093	0.558321	0.210859	-0.271273	0.376035	9214
(3313406,3322583)(3600360,3610360)(3600360,3610360)	NC_044998.1	3605360	37.0128	42.8703	30.7192	50.2576	46.5639	0.641805	0.579835	0.377433	-0.191165	0.267275	9177
(3322584,3331785)(3610361,3620361)(3610361,3620361)	NC_044998.1	3615361	33.0282	37.9867	32.6925	45.5758	41.7812	0.607646	0.281809	0.022437	-0.219888	0.274058	9201
(3331786,3341491)(3620362,3630362)(3620362,3630362)	NC_044998.1	3625362	32.8235	36.2438	26.9	56.0385	46.1412	0.421702	0.500333	0.398302	-0.577084	0.419534	9705
(3341492,3351147)(3630363,3640363)(3630363,3640363)	NC_044998.1	3635363	40.9915	45.6459	38.2605	70.0383	57.8421	0.461228	0.319411	0.148532	-0.570343	0.426317	9655
(3351148,3360963)(3640364,3650364)(3640364,3650364)	NC_044998.1	3645364	43.6743	56.3491	26.9789	73.4497	64.8994	1.17995	1.19478	0.854399	-0.375436	0.504377	9815
(3360964,3368798)(3650365,3660367)(3650365,3660365)	NC_044998.1	3655365	35.4178	40.6824	18.298	55.3383	48.0104	0.602377	1.11434	1.07077	-0.39621	0.368037	7834
(3368798,3378289)(3660367,3670366)(3660366,3670366)	NC_044998.1	3665366	44.2701	59.2698	11.7441	69.3218	64.2958	1.37785	1.90818	1.643	-0.217733	0.46954	9491
(3378290,3388007)(3670367,3680367)(3670367,3680367)	NC_044998.1	3675367	44.1686	52.2211	19.1722	60.1725	56.1968	0.741364	1.32987	1.26544	-0.172626	0.282664	9717
(3388008,3395474)(3680368,3690368)(3680368,3690368)	NC_044998.1	3685368	36.2359	42.7388	13.5999	56.4027	49.5707	0.727543	1.41912	1.38528	-0.361111	0.381049	7466
(3395475,3405392)(3690369,3700369)(3690369,3700369)	NC_044998.1	3695369	45.1063	54.0182	6.97148	67.5674	60.7928	0.803663	1.85505	1.89195	-0.288077	0.361055	9917
(3405393,3414100)(3700370,3710370)(3700370,3710370)	NC_044998.1	3705370	36.5642	44.9588	11.5634	66.0694	55.5141	0.930899	1.61239	1.51689	-0.552941	0.536706	8707
(3414101,3423064)(3710371,3720371)(3710371,3720371)	NC_044998.1	3715371	38.8148	51.002	7.83421	66.3443	58.6732	1.27435	1.96781	1.7754	-0.378713	0.530234	8963
(3423065,3432253)(3720372,3730372)(3720372,3730372)	NC_044998.1	3725372	39.2507	51.1067	8.2806	58.7731	54.9399	1.22617	1.93135	1.75592	-0.18715	0.414321	9188
(3432254,3442059)(3730373,3740373)(3730373,3740373)	NC_044998.1	3735373	41.575	52.8018	12.5772	62.3277	57.5647	1.09714	1.71611	1.55589	-0.219629	0.398927	9805
(3442060,3451590)(3740374,3750374)(3740374,3750374)	NC_044998.1	3745374	44.4495	53.3087	15.559	91.9089	72.6088	0.810559	1.50975	1.45369	-0.832755	0.657614	9530
(3451591,3460877)(3750375,3760375)(3750375,3760375)	NC_044998.1	3755375	38.0577	46.9766	10.8677	59.7885	53.3826	0.950858	1.67755	1.58781	-0.322498	0.417221	9286
(3460878,3470702)(3760376,3770376)(3760376,3770376)	NC_044998.1	3765376	58.6794	68.0632	23.4464	114.107	91.0849	0.652554	1.36244	1.35546	-0.753542	0.574794	9824
(3470703,3480399)(3770377,3780377)(3770377,3780377)	NC_044998.1	3775377	48.6621	56.2194	22.4016	85.4237	70.8215	0.63234	1.2389	1.21096	-0.575805	0.473148	9696
(3480400,3490074)(3780378,3790378)(3780378,3790378)	NC_044998.1	3785378	46.0602	57.4572	20.9273	72.3572	64.9072	1.00678	1.41148	1.22202	-0.310274	0.424913	9674
(3490075,3498573)(3790379,3800549)(3790379,3800379)	NC_044998.1	3795379	31.3505	36.4339	7.86536	45.9075	41.1707	0.655619	1.59841	1.64948	-0.289057	0.323666	8498
(3498573,3507607)(3800549,3810380)(3800380,3810380)	NC_044998.1	3805380	46.0321	51.4284	16.0951	74.0795	62.754	0.476977	1.36605	1.45646	-0.471969	0.377228	9034
(3507608,3517240)(3810381,3820381)(3810381,3820381)	NC_044998.1	3815381	44.4665	55.7856	9.34535	62.3679	59.0767	1.03522	1.85662	1.76655	-0.141953	0.341068	9632
(3517241,3525569)(3820382,3830693)(3820382,3830382)	NC_044998.1	3825382	27.5592	30.6986	8.25348	46.3659	38.5323	0.459389	1.41985	1.53152	-0.543169	0.410549	8328
(3525569,3533974)(3830693,3840383)(3830383,3840383)	NC_044998.1	3835383	28.8039	31.9916	15.385	31.6233	31.8075	0.446718	1.00731	1.0211	0.012221	0.107602	8405
(3533975,3543607)(3840384,3850384)(3840384,3850384)	NC_044998.1	3845384	38.926	43.7944	13.0206	57.2453	50.5198	0.507629	1.39897	1.48049	-0.331085	0.308692	9632
(3543608,3552703)(3850385,3860385)(3850385,3860385)	NC_044998.1	3855385	50.2462	60.0099	14.2308	84.3225	72.1662	0.791522	1.62575	1.6102	-0.464327	0.453426	9095
(3552704,3560890)(3860386,3870386)(3860386,3870386)	NC_044998.1	3865386	37.384	46.9671	11.1351	52.9868	49.977	1.03978	1.69354	1.55924	-0.154238	0.348944	8186
(3560891,3570566)(3870387,3880387)(3870387,3880387)	NC_044998.1	3875387	40.668	48.6293	15.4571	73.633	61.1312	0.7951	1.44568	1.38163	-0.589257	0.521781	9675
(3570567,3580241)(3880388,3890388)(3880388,3890388)	NC_044998.1	3885388	47.0994	52.2453	27.9091	74.4283	63.3368	0.444673	0.920218	0.913234	-0.451799	0.358084	9674
(3580242,3589076)(3890389,3900389)(3890389,3900389)	NC_044998.1	3895389	51.1384	52.0635	36.3203	83.2123	67.6379	0.073702	0.54961	0.651326	-0.58456	0.335402	8834
(3589077,3598629)(3900390,3910390)(3900390,3910390)	NC_044998.1	3905390	43.6923	56.1472	13.9182	78.9096	67.5284	1.15901	1.7172	1.52312	-0.499531	0.56619	9552
(3598630,3608526)(3910391,3920391)(3910391,3920391)	NC_044998.1	3915391	36.846	39.85	14.5879	59.6642	49.7571	0.330612	1.21073	1.34061	-0.515046	0.362912	9896
(3608527,3618444)(3920392,3930392)(3920392,3930392)	NC_044998.1	3925392	41.378	51.7137	9.73024	49.9362	50.825	1.0148	1.79938	1.70583	0.041175	0.236802	9917
(3618445,3624641)(3930393,3940521)(3930393,3940393)	NC_044998.1	3935393	27.5854	32.9053	12.832	53.6431	43.2742	0.777711	1.26866	1.16934	-0.718282	0.586431	6196
(3624641,3633910)(3940521,3950484)(3940394,3950394)	NC_044998.1	3945394	29.0611	33.1568	14.0568	42.5268	37.8418	0.568993	1.14879	1.1322	-0.308211	0.311827	9269
(3633910,3643714)(3950484,3960395)(3950395,3960395)	NC_044998.1	3955395	43.2073	48.5293	32.4989	65.9712	57.2502	0.500723	0.658928	0.553702	-0.387041	0.33727	9804
(3643715,3653496)(3960396,3970396)(3960396,3970396)	NC_044998.1	3965396	34.1849	42.26	10.9195	54.5318	48.3959	0.956675	1.61413	1.50509	-0.343631	0.430104	9781
(3653497,3663406)(3970397,3980397)(3970397,3980397)	NC_044998.1	3975397	36.9112	43.539	5.6839	50.9457	47.2424	0.728178	1.81119	1.87766	-0.192192	0.289888	9909
(3663407,3670858)(3980398,3990398)(3980398,3990398)	NC_044998.1	3985398	33.698	39.6323	8.7309	42.6804	41.1563	0.713028	1.61354	1.63737	-0.086574	0.228946	7451
(3670859,3679564)(3990399,4000399)(3990399,4000399)	NC_044998.1	3995399	44.9927	52.9198	9.27241	61.6753	57.2975	0.716632	1.72522	1.77646	-0.186623	0.283926	8705
(3679565,3689487)(4000400,4010400)(4000400,4010400)	NC_044998.1	4005400	43.5719	55.2704	8.17006	63.1666	59.2185	1.09158	1.9204	1.81581	-0.173762	0.372676	9922
(3689488,3699388)(4010401,4020401)(4010401,4020401)	NC_044998.1	4015401	38.1091	44.5708	18.8358	50.6548	47.6128	0.687966	1.19404	1.12405	-0.152943	0.258394	9900
(3699389,3708108)(4020402,4030402)(4020402,4030402)	NC_044998.1	4025402	38.8319	44.8437	13.5246	59.0092	51.9264	0.628342	1.42708	1.44966	-0.349513	0.349482	8719
(3708109,3717833)(4030403,4040403)(4030403,4040403)	NC_044998.1	4035403	36.0065	42.3547	11.5207	48.0472	45.201	0.714687	1.51087	1.5076	-0.151394	0.264388	9724
(3717834,3726283)(4040404,4050404)(4040404,4050404)	NC_044998.1	4045404	33.1375	37.9426	9.18981	47.3643	42.6535	0.586942	1.52567	1.59576	-0.272095	0.296978	8449
(3726284,3735827)(4050405,4060405)(4050405,4060405)	NC_044998.1	4055405	32.623	36.4496	15.9734	42.3958	39.4227	0.474651	1.10289	1.12607	-0.174408	0.215503	9543
(3735828,3745604)(4060406,4070550)(4060406,4070406)	NC_044998.1	4065406	46.6495	52.6346	26.2812	55.8388	54.2367	0.52211	1.0058	0.978299	-0.065885	0.168917	9776
(3745604,3755015)(4070550,4080407)(4070407,4080407)	NC_044998.1	4075407	36.6871	47.165	9.11242	52.0849	49.625	1.1581	1.83133	1.6677	-0.128438	0.36522	9411
(3755016,3764649)(4080408,4090408)(4080408,4090408)	NC_044998.1	4085408	43.6369	55.2834	8.1531	61.9439	58.6137	1.08514	1.91885	1.81741	-0.146352	0.356197	9633
(3764650,3773102)(4090409,4100409)(4090409,4100409)	NC_044998.1	4095409	38.5315	44.1976	19.0036	50.7952	47.4964	0.596764	1.15661	1.12695	-0.164046	0.241108	8452
(3773103,3781551)(4100410,4110410)(4100410,4110410)	NC_044998.1	4105410	36.9378	43.2361	9.78242	56.9873	50.1117	0.691479	1.59949	1.6317	-0.356562	0.369389	8448
(3781552,3791247)(4110411,4120411)(4110411,4120411)	NC_044998.1	4115411	47.2279	49.7363	14.9541	62.1727	55.9545	0.216175	1.31174	1.53182	-0.252606	0.19193	9695
(3791248,3799953)(4120412,4130412)(4120412,4130412)	NC_044998.1	4125412	49.2742	52.3395	18.5954	79.5085	65.924	0.253341	1.2213	1.39773	-0.529059	0.351136	8705
(3799954,3809799)(4130413,4140413)(4130413,4140413)	NC_044998.1	4135413	45.6387	56.4466	8.50415	66.2624	61.3545	0.963426	1.86901	1.82163	-0.206279	0.357554	9845
(3809800,3819362)(4140414,4150414)(4140414,4150414)	NC_044998.1	4145414	31.9211	39.6745	8.20665	36.8005	38.2375	0.982457	1.73055	1.63734	0.086134	0.20452	9562
(3819363,3829072)(4150415,4160415)(4150415,4160415)	NC_044998.1	4155415	41.6709	55.7922	5.69872	75.9427	65.8675	1.37688	2.1324	1.92584	-0.463525	0.602306	9709
(3829073,3839024)(4160416,4170416)(4160416,4170416)	NC_044998.1	4165416	38.4876	48.6874	14.4493	57.2637	52.9755	1.07545	1.57352	1.38876	-0.213489	0.390084	9951
(3839025,3848909)(4170417,4180417)(4170417,4180417)	NC_044998.1	4175417	39.9147	48.7205	6.99087	52.6278	50.6742	0.895794	1.85171	1.83694	-0.093809	0.279467	9884
(3848910,3858855)(4180418,4190418)(4180418,4190418)	NC_044998.1	4185418	44.3562	57.3885	8.22832	61.5677	59.4781	1.19484	1.97009	1.82154	-0.090351	0.353881	9945
(3858856,3867355)(4190419,4215703)(4190419,4200419)	NC_044998.1	4195419	29.5529	33.1394	11.133	44.9205	39.0299	0.490127	1.30262	1.36808	-0.381129	0.331045	8499
(3867355,3867355)(4215703,4215703)(4200420,4210420)	NC_044998.1	4205420	0	0	0	0	0	0					0
(3867355,3871090)(4215703,4220421)(4210421,4220421)	NC_044998.1	4215421	19.8008	26.8629	9.87109	34.1649	30.5139	1.42604	1.46738	1.07205	-0.351026	0.554079	3735
(3871091,3879009)(4220422,4230422)(4220422,4230422)	NC_044998.1	4225422	36.1286	45.5432	15.1137	61.9635	53.7533	1.05638	1.4862	1.28972	-0.435238	0.50511	7918
(3879010,3888273)(4230423,4240423)(4230423,4240423)	NC_044998.1	4235423	39.5883	45.9111	20.9695	60.5141	53.2126	0.648428	1.11556	1.04702	-0.353468	0.35676	9263
(3888274,3897549)(4240424,4250424)(4240424,4250424)	NC_044998.1	4245424	43.0898	47.7943	24.4513	56.6547	52.2245	0.443821	0.962044	0.966272	-0.197149	0.219982	9275
(3897550,3906328)(4250425,4260425)(4250425,4260425)	NC_044998.1	4255425	40.1981	52.7386	5.75801	59.1219	55.9303	1.26686	2.07055	1.90856	-0.15218	0.405781	8778
(3906329,3915281)(4260426,4270426)(4260426,4270426)	NC_044998.1	4265426	43.3595	55.9234	11.208	66.7278	61.3256	1.17799	1.83179	1.65686	-0.238918	0.429996	8952
(3915282,3923827)(4270427,4280427)(4270427,4280427)	NC_044998.1	4275427	48.9947	58.1877	15.4672	69.6463	63.917	0.764049	1.55473	1.53593	-0.224396	0.316479	8545
(3923828,3933727)(4280428,4290428)(4280428,4290428)	NC_044998.1	4285428	57.6053	67.895	10.512	70.6363	69.2656	0.728748	1.78411	1.84451	-0.045696	0.21065	9899
(3933728,3943071)(4290429,4300429)(4290429,4300429)	NC_044998.1	4295429	37.9545	44.3677	12.6169	55.8349	50.1013	0.685541	1.47894	1.48348	-0.289429	0.331583	9343
(3943072,3952496)(4300430,4310430)(4300430,4310430)	NC_044998.1	4305430	43.9178	51.7224	13.8654	65.4293	58.5759	0.722594	1.53177	1.52976	-0.299269	0.346413	9424
(3952497,3962321)(4310431,4320431)(4310431,4320431)	NC_044998.1	4315431	34.455	42.5682	9.18891	49.3585	45.9633	0.953779	1.7062	1.62232	-0.188659	0.345611	9824
(3962322,3971078)(4320432,4331641)(4320432,4330432)	NC_044998.1	4325432	35.5061	43.1636	9.33802	75.8742	59.5189	0.87403	1.67988	1.63282	-0.882117	0.700088	8756
(3971078,3978532)(4331641,4340433)(4330433,4340433)	NC_044998.1	4335433	52.8463	56.6354	17.8283	104.981	80.8081	0.292234	1.31221	1.49107	-0.878111	0.550209	7454
(3978533,3987475)(4340434,4350434)(4340434,4350434)	NC_044998.1	4345434	42.7523	43.5273	18.7401	75.239	59.3832	0.073679	1.02936	1.2543	-0.711134	0.403626	8942
(3987476,3996830)(4350435,4360435)(4350435,4360435)	NC_044998.1	4355435	49.6099	53.7737	20.0903	75.9464	64.8601	0.341827	1.21109	1.33613	-0.428859	0.319462	9354
(3996831,4006284)(4360436,4370436)(4360436,4370436)	NC_044998.1	4365436	36.5769	43.7849	11.7045	62.7223	53.2536	0.799044	1.54838	1.5086	-0.495849	0.472162	9453
(4006285,4015860)(4370437,4380437)(4370437,4380437)	NC_044998.1	4375437	41.6675	52.1121	9.86257	76.9383	64.5252	1.01846	1.79863	1.70288	-0.571129	0.569022	9575
(4015861,4025365)(4380438,4390438)(4380438,4390438)	NC_044998.1	4385438	46.7879	53.1393	11.765	77.9611	65.5502	0.552457	1.57457	1.67737	-0.50889	0.416494	9504
(4025366,4034546)(4390439,4400439)(4390439,4400439)	NC_044998.1	4395439	34.2799	38.318	11.2235	62.4707	50.3944	0.477099	1.39173	1.48764	-0.674454	0.48638	9180
(4034547,4042976)(4400440,4410440)(4400440,4410440)	NC_044998.1	4405440	37.1811	36.7341	32.3114	63.3579	50.046	-0.048753	0.210128	0.290775	-0.685858	0.358399	8429
(4042977,4052646)(4410441,4420441)(4410441,4420441)	NC_044998.1	4415441	24.2815	26.7774	24.0918	32.4015	29.5894	0.413286	0.19152	0.016945	-0.221015	0.224866	9669
(4052647,4062510)(4420442,4430442)(4420442,4430442)	NC_044998.1	4425442	36.0409	43.5018	19.5987	57.151	50.3264	0.839161	1.17018	1.01143	-0.36266	0.410392	9863
(4062511,4072363)(4430443,4440443)(4430443,4440443)	NC_044998.1	4435443	38.7817	43.5631	37.7607	52.7216	48.1423	0.500385	0.264721	0.058557	-0.226263	0.250148	9852
(4072364,4082263)(4440444,4450444)(4440444,4450444)	NC_044998.1	4445444	41.5788	44.9985	30.3498	67.4593	56.2289	0.334159	0.624907	0.602449	-0.517808	0.365471	9899
(4082264,4090346)(4450445,4460472)(4450445,4460445)	NC_044998.1	4455445	40.0703	46.3058	34.3894	61.6951	54.0004	0.631896	0.5268	0.31578	-0.368051	0.360434	8082
(4090346,4100161)(4460472,4470446)(4460446,4470446)	NC_044998.1	4465446	26.5465	38.7181	2.6393	50.4279	44.573	1.84742	2.36482	1.96452	-0.421302	0.699704	9815
(4100162,4109930)(4470447,4480447)(4470447,4480447)	NC_044998.1	4475447	26.7146	40.1977	3.47253	49.2317	44.7147	2.0339	2.39283	1.89857	-0.323005	0.694365	9768
(4109931,4119657)(4480448,4490448)(4480448,4490448)	NC_044998.1	4485448	33.829	52.9237	1.14326	67.1885	60.0561	2.28556	2.69373	2.13568	-0.403605	0.802007	9726
(4119658,4129327)(4490449,4500449)(4490449,4500449)	NC_044998.1	4495449	29.46	45.3429	3.81556	53.7471	49.545	2.17722	2.46548	1.91034	-0.272733	0.703768	9669
(4129328,4135842)(4500450,4510450)(4500450,4510450)	NC_044998.1	4505450	20.3466	31.5442	1.2454	35.2444	33.3943	2.20221	2.55096	2.01114	-0.173168	0.657139	6514
(4135843,4145066)(4510451,4520451)(4510451,4520451)	NC_044998.1	4515451	29.8043	40.9732	1.75908	56.4037	48.6884	1.51371	2.30252	2.06636	-0.495018	0.654175	9223
(4145067,4153033)(4520452,4530452)(4520452,4530452)	NC_044998.1	4525452	21.352	25.9608	4.66038	41.7544	33.8576	0.864918	1.71423	1.68072	-0.704764	0.600845	7966
(4153034,4162901)(4530453,4540453)(4530453,4540453)	NC_044998.1	4535453	32.3755	44.1009	2.6469	69.4898	56.7953	1.46531	2.24912	2.02524	-0.750333	0.779764	9867
(4162902,4171970)(4540454,4550454)(4540454,4550454)	NC_044998.1	4545454	30.0714	41.0958	6.82954	59.4231	50.2594	1.48111	1.99495	1.69807	-0.582773	0.693229	9068
(4171971,4180671)(4550455,4560455)(4550455,4560455)	NC_044998.1	4555455	17.9553	28.3177	3.21762	31.4127	29.8652	2.30038	2.37398	1.74081	-0.163856	0.677607	8700
(4180672,4187438)(4560456,4570456)(4560456,4570456)	NC_044998.1	4565456	21.4984	30.775	3.51763	41.674	36.2245	1.72939	2.17964	1.7991	-0.483077	0.70282	6766
(4187439,4197213)(4570457,4580457)(4570457,4580457)	NC_044998.1	4575457	29.3179	41.9799	5.73735	55.5917	48.7858	1.74394	2.16166	1.76463	-0.443855	0.685398	9774
(4197214,4207008)(4580458,4590458)(4580458,4590458)	NC_044998.1	4585458	21.0497	29.695	3.38148	34.461	32.078	1.64507	2.14615	1.80272	-0.21569	0.5373	9794
(4207009,4215437)(4590459,4600459)(4590459,4600459)	NC_044998.1	4595459	36.0055	53.1579	3.0645	60.6391	56.8985	1.93109	2.45465	2.02823	-0.198968	0.600796	8428
(4215438,4225028)(4600460,4610460)(4600460,4610460)	NC_044998.1	4605460	33.789	48.1174	4.01804	64.3977	56.2576	1.71706	2.29675	1.94742	-0.461172	0.687878	9590
(4225029,4234197)(4610461,4620461)(4610461,4620461)	NC_044998.1	4615461	28.3703	38.5033	10.7618	56.6313	47.5673	1.44124	1.70718	1.35922	-0.610677	0.698051	9168
(4234198,4243436)(4620462,4630462)(4620462,4630462)	NC_044998.1	4625462	33.5107	47.3308	10.6037	56.2687	51.7997	1.66965	1.928	1.51025	-0.255268	0.564502	9238
(4243437,4252556)(4630463,4640463)(4630463,4640463)	NC_044998.1	4635463	29.4063	37.6063	13.0575	52.8174	45.2119	1.12607	1.46	1.21997	-0.494526	0.554816	9119
(4252557,4260383)(4640464,4650464)(4640464,4650464)	NC_044998.1	4645464	23.4202	30.5721	11.4664	44.4058	37.4889	1.22669	1.4097	1.10452	-0.563405	0.617478	7826
(4260384,4270302)(4650465,4660465)(4650465,4660465)	NC_044998.1	4655465	32.5803	39.3109	16.5882	56.0457	47.6783	0.835927	1.22542	1.08294	-0.491491	0.479118	9918
(4270303,4279542)(4660466,4670466)(4660466,4670466)	NC_044998.1	4665466	28.8941	31.0782	12.0178	67.3814	49.2298	0.305136	1.15271	1.28041	-1.20098	0.726277	9239
(4279543,4289299)(4670467,4680467)(4670467,4680467)	NC_044998.1	4675467	36.3407	46.4091	17.5935	67.2153	56.8122	1.12326	1.39949	1.14413	-0.548295	0.583318	9756
(4289300,4299195)(4680468,4690468)(4680468,4690468)	NC_044998.1	4685468	25.901	33.7331	13.7812	56.7088	45.221	1.21769	1.33862	1.0192	-0.847019	0.768248	9895
(4299196,4309080)(4690469,4700469)(4690469,4700469)	NC_044998.1	4695469	35.6822	51.6224	11.1175	64.6797	58.1511	1.81059	2.00206	1.52555	-0.350397	0.651887	9884
(4309081,4318956)(4700470,4710470)(4700470,4710470)	NC_044998.1	4705470	35.5557	47.8558	7.50021	56.687	52.2714	1.402	2.00149	1.74826	-0.237825	0.486671	9875
(4318957,4328863)(4710471,4720471)(4710471,4720471)	NC_044998.1	4715471	48.7984	68.467	7.30192	77.498	72.9825	1.64119	2.23468	1.90838	-0.177563	0.51495	9906
(4328864,4338259)(4720472,4730472)(4720472,4730472)	NC_044998.1	4725472	42.3683	50.584	28.909	65.8455	58.2147	0.788064	0.907998	0.709182	-0.345321	0.388035	9395
(4338260,4348134)(4730473,4740473)(4730473,4740473)	NC_044998.1	4735473	51.4722	67.021	34.3723	88.7228	77.8719	1.23084	1.13261	0.746906	-0.404644	0.533206	9874
(4348135,4357403)(4740474,4750474)(4740474,4750474)	NC_044998.1	4745474	51.2791	70.2811	25.6896	85.6253	77.9532	1.50979	1.55258	1.1218	-0.287174	0.540758	9268
(4357404,4366493)(4750475,4760475)(4750475,4760475)	NC_044998.1	4755475	47.4353	53.5733	35.52	83.9591	68.7662	0.526691	0.677954	0.563156	-0.614508	0.467114	9089
(4366494,4376315)(4760476,4770476)(4760476,4770476)	NC_044998.1	4765476	41.3112	55.2711	18.9716	79.238	67.2546	1.37282	1.5582	1.20599	-0.556085	0.651345	9821
(4376316,4385792)(4770477,4780477)(4770477,4780477)	NC_044998.1	4775477	33.0228	39.3878	25.3535	55.6398	47.5138	0.780122	0.747159	0.512739	-0.470964	0.453783	9476
(4385793,4395528)(4780478,4790478)(4780478,4790478)	NC_044998.1	4785478	29.0045	36.7549	14.5486	49.1555	42.9552	1.07875	1.3381	1.09283	-0.408689	0.496374	9735
(4395529,4405081)(4790479,4800479)(4790479,4800479)	NC_044998.1	4795479	42.7244	50.455	28.797	79.2318	64.8434	0.73544	0.899977	0.72797	-0.645739	0.53717	9552
(4405082,4414908)(4800480,4810480)(4800480,4810480)	NC_044998.1	4805480	43.5646	49.8685	26.4374	80.07	64.9692	0.588311	0.955497	0.878619	-0.664718	0.509909	9826
(4414909,4424302)(4810481,4820766)(4810481,4820481)	NC_044998.1	4815481	52.7361	64.0712	24.4291	80.3899	72.2305	0.876034	1.34318	1.20775	-0.297016	0.384389	9393
(4424302,4433917)(4820766,4830482)(4820482,4830482)	NC_044998.1	4825482	32.5834	39.6669	17.8389	56.1391	47.903	0.879677	1.17707	0.998374	-0.483731	0.486104	9615
(4433918,4443776)(4830483,4840483)(4830483,4840483)	NC_044998.1	4835483	48.2345	60.4607	15.8022	77.6788	69.0697	1.03196	1.65011	1.50835	-0.342473	0.448778	9858
(4443777,4452810)(4840484,4850484)(4840484,4850484)	NC_044998.1	4845484	41.743	46.4454	26.7935	72.3886	59.417	0.457722	0.835155	0.799025	-0.595754	0.439195	9033
(4452811,4461486)(4850485,4861888)(4850485,4860485)	NC_044998.1	4855485	50.1441	59.2979	15.8023	71.8063	65.5521	0.743574	1.54771	1.5384	-0.23937	0.319364	8675
(4461486,4469403)(4861888,4870486)(4860486,4870486)	NC_044998.1	4865486	40.5886	42.7948	18.6432	55.7167	49.2558	0.220765	1.05454	1.20492	-0.305119	0.221429	7917
(4469404,4479048)(4870487,4880487)(4870487,4880487)	NC_044998.1	4875487	41.8129	56.7536	10.5404	63.8357	60.2946	1.4519	1.96077	1.66878	-0.162361	0.458507	9644
(4479049,4489017)(4880488,4890488)(4880488,4890488)	NC_044998.1	4885488	37.6542	43.7161	11.8449	62.2171	52.9666	0.653074	1.49594	1.52262	-0.470662	0.421291	9968
(4489018,4498874)(4890489,4900489)(4890489,4900489)	NC_044998.1	4895489	35.1831	41.4766	7.50204	50.059	45.7678	0.724828	1.70215	1.74233	-0.233553	0.31139	9856
(4498875,4508041)(4900490,4910490)(4900490,4910490)	NC_044998.1	4905490	36.4462	45.7204	4.60851	71.7936	58.757	1.03171	1.99113	1.93768	-0.685118	0.633912	9166
(4508042,4513979)(4910491,4921075)(4910491,4920491)	NC_044998.1	4915491	35.7109	42.7313	10.8792	67.4099	55.0706	0.796796	1.57316	1.54096	-0.661725	0.561234	5937
(4513979,4522595)(4921075,4930492)(4920492,4930492)	NC_044998.1	4925492	41.4672	44.2607	25.9347	72.7482	58.5045	0.273695	0.78381	0.835486	-0.658502	0.426153	8616
(4522596,4532217)(4930493,4940493)(4930493,4940493)	NC_044998.1	4935493	38.8171	40.1695	24.1379	66.9842	53.5769	0.141399	0.730759	0.841169	-0.661862	0.394072	9621
(4532218,4541860)(4940494,4950494)(4940494,4950494)	NC_044998.1	4945494	55.2107	67.9265	35.0746	85.2384	76.5824	0.939192	1.06453	0.821816	-0.30104	0.402687	9642
(4541861,4550763)(4950495,4960495)(4950495,4960495)	NC_044998.1	4955495	36.466	43.3192	21.6095	63.8305	53.5749	0.761986	1.0509	0.903715	-0.53868	0.485851	8902
(4550764,4557402)(4960496,4970496)(4960496,4970496)	NC_044998.1	4965496	29.9825	37.6203	12.4109	49.9743	43.7973	1.02912	1.47182	1.28739	-0.393988	0.475767	6638
(4557403,4567194)(4970497,4980497)(4970497,4980497)	NC_044998.1	4975497	51.4319	57.9082	21.0844	105.634	81.7712	0.513058	1.27842	1.32656	-0.890575	0.613252	9791
(4567195,4576406)(4980498,4990498)(4980498,4990498)	NC_044998.1	4985498	39.4785	44.1894	11.7094	64.6721	54.4307	0.484433	1.45661	1.56574	-0.497157	0.392606	9211
(4576407,4586261)(4990499,5000499)(4990499,5000499)	NC_044998.1	4995499	36.5536	43.0447	15.3543	56.0675	49.5561	0.720027	1.33732	1.28659	-0.341199	0.368368	9854
(4586262,4596100)(5000500,5010500)(5000500,5010500)	NC_044998.1	5005500	39.4283	52.0474	10.5587	65.5314	58.7894	1.29929	1.86291	1.62977	-0.327698	0.50901	9838
(4596101,4606010)(5010501,5020501)(5010501,5020501)	NC_044998.1	5015501	40.5212	51.5532	15.0946	65.7983	58.6758	1.10571	1.59446	1.39829	-0.336918	0.464572	9909
(4606011,4615856)(5020502,5030502)(5020502,5030502)	NC_044998.1	5025502	45.7516	58.6364	9.44082	71.7567	65.1965	1.14577	1.91328	1.77698	-0.275047	0.441318	9845
(4615857,4625641)(5030503,5040503)(5030503,5040503)	NC_044998.1	5035503	35.4991	43.0286	15.2392	63.8979	53.4632	0.859585	1.38037	1.2644	-0.5629	0.523843	9784
(4625642,4634998)(5040504,5050504)(5040504,5050504)	NC_044998.1	5045504	44.2774	57.3755	10.909	63.5525	60.464	1.20298	1.86535	1.68528	-0.133777	0.379463	9356
(4634999,4644864)(5050505,5060505)(5050505,5060505)	NC_044998.1	5055505	34.4197	43.0442	8.85286	64.3481	53.6961	1.01492	1.74944	1.64324	-0.592503	0.579489	9865
(4644865,4652955)(5060506,5070506)(5060506,5070506)	NC_044998.1	5065506	32.6116	40.5129	13.2419	58.6019	49.5574	0.980397	1.46936	1.31047	-0.530754	0.537245	8090
(4652956,4662468)(5070507,5080507)(5070507,5080507)	NC_044998.1	5075507	31.0325	44.2557	9.5206	62.4982	53.377	1.7226	1.96246	1.52556	-0.562265	0.74389	9512
(4662469,4672295)(5080508,5090508)(5080508,5090508)	NC_044998.1	5085508	20.9964	35.8292	3.15679	44.2107	40.0199	2.82942	2.67112	1.82448	-0.380263	0.92913	9826
(4672296,4681508)(5090509,5100509)(5090509,5100509)	NC_044998.1	5095509	41.0135	58.8264	11.3476	93.5339	76.1802	1.76424	2.05236	1.61264	-0.811096	0.889239	9212
(4681509,4691377)(5100510,5110510)(5100510,5110510)	NC_044998.1	5105510	32.2405	33.8661	14.9106	68.6406	51.2534	0.203987	1.03257	1.18528	-1.03198	0.609614	9868
(4691378,4701063)(5110511,5120511)(5110511,5120511)	NC_044998.1	5115511	28.2876	34.7904	6.88907	51.9794	43.3849	0.927557	1.72178	1.65633	-0.580723	0.550554	9685
(4701064,4710097)(5120512,5130512)(5120512,5130512)	NC_044998.1	5125512	27.951	32.187	10.8044	57.9148	45.0509	0.611353	1.33462	1.34227	-0.879571	0.630966	9033
(4710098,4719318)(5130513,5140513)(5130513,5140513)	NC_044998.1	5135513	32.5443	32.5964	18.9175	56.605	44.6007	0.006473	0.738479	0.923747	-0.705892	0.383012	9220
(4719319,4727849)(5140514,5150514)(5140514,5150514)	NC_044998.1	5145514	26.8616	32.856	13.4991	47.4468	40.1514	0.899408	1.25465	1.08592	-0.518855	0.509905	8530
(4727850,4737702)(5150515,5160515)(5150515,5160515)	NC_044998.1	5155515	34.5853	38.2601	23.4528	66.5679	52.414	0.430402	0.754149	0.71225	-0.783555	0.533434	9852
(4737703,4747422)(5160516,5170516)(5160516,5170516)	NC_044998.1	5165516	37.4628	43.0821	29.1052	59.9629	51.5225	0.608426	0.659256	0.495466	-0.431623	0.388775	9719
(4747423,4757317)(5170517,5180517)(5170517,5180517)	NC_044998.1	5175517	29.0006	36.1865	11.1585	41.7614	38.974	1.00032	1.50832	1.34899	-0.183758	0.354907	9894
(4757318,4767184)(5180518,5190518)(5180518,5190518)	NC_044998.1	5185518	39.2432	47.8469	12.0654	55.5883	51.7176	0.889965	1.61394	1.54119	-0.189019	0.329483	9866
(4767185,4776462)(5190519,5200519)(5190519,5200519)	NC_044998.1	5195519	49.5926	57.3143	14.635	85.1536	71.234	0.634129	1.53506	1.5828	-0.538648	0.453502	9277
(4776463,4786039)(5200520,5210520)(5200520,5210520)	NC_044998.1	5205520	36.3268	44.6193	9.50463	57.4314	51.0254	0.925481	1.70604	1.63755	-0.337758	0.41898	9576
(4786040,4795317)(5210521,5220521)(5210521,5220521)	NC_044998.1	5215521	45.5725	57.4916	18.8203	66.4115	61.9515	1.064	1.5097	1.31416	-0.187722	0.37318	9277
(4795318,4804921)(5220522,5230522)(5220522,5230522)	NC_044998.1	5225522	43.5426	50.7084	14.82	75.2098	62.9591	0.669081	1.46421	1.47418	-0.539532	0.462777	9603
(4804922,4814089)(5230523,5240523)(5230523,5240523)	NC_044998.1	5235523	45.4882	53.7556	7.57646	103.941	78.8482	0.739367	1.80604	1.86568	-1.05811	0.761467	9167
(4814090,4823972)(5240524,5250524)(5240524,5250524)	NC_044998.1	5245524	46.4953	53.9385	2.54217	93.538	73.7383	0.651441	1.9679	2.11783	-0.816939	0.608516	9882
(4823973,4833330)(5250525,5260525)(5250525,5260525)	NC_044998.1	5255525	26.9841	30.5783	2.75203	44.6334	37.6059	0.536883	1.79584	1.96085	-0.497557	0.405719	9357
(4833331,4841089)(5260526,5270526)(5260526,5270526)	NC_044998.1	5265526	30.8224	32.9809	5.97296	66.2535	49.6172	0.283069	1.53581	1.77362	-1.03245	0.629912	7758
(4841090,4850479)(5270527,5280527)(5270527,5280527)	NC_044998.1	5275527	40.0023	46.4882	5.76249	84.7505	65.6193	0.658366	1.80335	1.90636	-0.916623	0.663935	9389
(4850480,4859090)(5280528,5290528)(5280528,5290528)	NC_044998.1	5285528	41.5654	53.6307	2.74605	67.5848	60.6077	1.17935	2.17138	2.08333	-0.3218	0.475196	8610
(4859091,4867196)(5290529,5300529)(5290529,5300529)	NC_044998.1	5295529	30.1246	38.3217	1.22353	50.3135	44.3176	1.09937	2.15619	2.108	-0.380651	0.486524	8105
(4867197,4874347)(5300530,5310530)(5300530,5310530)	NC_044998.1	5305530	31.9125	42.3864	2.50352	64.7011	53.5438	1.32753	2.19389	2.03104	-0.668968	0.700588	7150
(4874348,4883737)(5310531,5320531)(5310531,5320531)	NC_044998.1	5315531	50.9146	64.6335	7.38025	83.901	74.2673	1.09774	2.00731	1.92167	-0.363169	0.476781	9389
(4883738,4893478)(5320532,5330532)(5320532,5330532)	NC_044998.1	5325532	42.9603	57.3462	1.5568	80.8036	69.0749	1.36118	2.30597	2.1527	-0.523501	0.630761	9740
(4893479,4903344)(5330533,5340533)(5330533,5340533)	NC_044998.1	5335533	40.7312	54.8444	2.02617	55.1566	55.0005	1.40734	2.29843	2.11799	-0.007347	0.363288	9865
(4903345,4910914)(5340534,5350534)(5340534,5350534)	NC_044998.1	5345534	36.1764	51.6962	7.70699	60.2815	55.9889	1.73916	2.14575	1.74501	-0.227263	0.567068	7569
(4910915,4920471)(5350536,5360535)(5350535,5360535)	NC_044998.1	5355535	43.2496	58.9282	15.9981	74.5307	66.7294	1.47372	1.76298	1.40778	-0.345886	0.563373	9556
(4920472,4929303)(5360536,5370536)(5360536,5370536)	NC_044998.1	5365536	40.3142	64.2099	6.70416	70.2563	67.2331	2.40712	2.52737	1.85742	-0.143736	0.692345	8831
(4929304,4938805)(5370537,5380537)(5370537,5380537)	NC_044998.1	5375537	37.9565	51.8441	11.3125	78.2911	65.0676	1.48446	1.88785	1.55989	-0.667486	0.740047	9501
(4938806,4948670)(5380538,5390538)(5380538,5390538)	NC_044998.1	5385538	34.3318	47.6746	17.3588	51.2406	49.4576	1.57411	1.55495	1.09355	-0.099431	0.455859	9864
(4948671,4957524)(5390539,5400539)(5390539,5400539)	NC_044998.1	5395539	32.7909	47.4471	11.9828	51.8955	49.6713	1.8088	1.90082	1.40048	-0.129815	0.532293	8853
(4957525,4966976)(5400540,5410540)(5400540,5410540)	NC_044998.1	5405540	34.0593	46.8238	14.461	59.9945	53.4092	1.51773	1.67267	1.27231	-0.370146	0.587763	9451
(4966977,4976067)(5410541,5420541)(5410541,5420541)	NC_044998.1	5415541	36.8064	53.7626	10.8529	56.1393	54.9509	1.86815	2.05865	1.5648	-0.061844	0.510559	9090
(4976068,4985622)(5420542,5430542)(5420542,5430542)	NC_044998.1	5425542	42.4801	59.1451	15.6522	68.2253	63.6852	1.59438	1.81734	1.41001	-0.20492	0.5179	9554
(4985623,4994993)(5430543,5440543)(5430543,5440543)	NC_044998.1	5435543	34.56	46.8732	15.9791	63.6503	55.2618	1.44322	1.57458	1.18962	-0.464723	0.619844	9370
(4994994,5004836)(5440544,5450544)(5440544,5450544)	NC_044998.1	5445544	36.6496	54.4102	10.5844	56.3012	55.3557	1.965	2.11125	1.57795	-0.049414	0.528582	9842
(5004837,5014623)(5450545,5460545)(5450545,5460545)	NC_044998.1	5455545	44.2307	58.3328	22.5844	78.4651	68.399	1.29654	1.43655	1.09437	-0.436465	0.56717	9786
(5014624,5023843)(5460546,5470546)(5460546,5470546)	NC_044998.1	5465546	31.3163	47.4031	9.1459	47.1533	47.2782	2.07701	2.14273	1.55875	0.007631	0.526659	9219
(5023844,5033659)(5470547,5480547)(5470547,5480547)	NC_044998.1	5475547	41.6914	60.446	12.6972	72.5173	66.4816	1.82774	2.03162	1.55153	-0.277544	0.616782	9815
(5033660,5042635)(5480548,5490548)(5480548,5490548)	NC_044998.1	5485548	31.4413	42.7237	13.3238	64.5662	53.645	1.45103	1.6404	1.269	-0.664545	0.729741	8975
(5042636,5050964)(5490549,5500549)(5490549,5500549)	NC_044998.1	5495549	39.1447	59.561	11.9013	70.3397	64.9503	2.1171	2.15493	1.54863	-0.263836	0.683294	8328
(5050965,5060284)(5500550,5510550)(5500550,5510550)	NC_044998.1	5505550	37.0049	52.0375	15.6599	63.3561	57.6968	1.64748	1.73626	1.28035	-0.292959	0.579156	9319
(5060285,5069572)(5510551,5520551)(5510551,5520551)	NC_044998.1	5515551	45.0397	64.6863	15.8854	79.1328	71.9096	1.77429	1.92697	1.44846	-0.307605	0.619365	9287
(5069573,5079470)(5520552,5530552)(5520552,5530552)	NC_044998.1	5525552	23.7252	36.7264	5.18121	29.8605	33.2935	2.20205	2.29935	1.69288	0.276072	0.414667	9897
(5079471,5089264)(5530553,5540553)(5530553,5540553)	NC_044998.1	5535553	42.9642	61.204	3.29025	68.8999	65.0519	1.72568	2.39357	2.06259	-0.171734	0.533451	9793
(5089265,5097946)(5540554,5550554)(5540554,5550554)	NC_044998.1	5545554	28.3668	38.2056	5.01098	44.8488	41.5272	1.39957	2.04299	1.80307	-0.223817	0.478604	8681
(5097947,5106086)(5550555,5561239)(5550555,5560555)	NC_044998.1	5555555	31.0025	44.8888	2.20797	39.1051	41.9969	1.81069	2.41359	2.04389	0.178433	0.366375	8139
(5106086,5115146)(5561239,5570556)(5560556,5570556)	NC_044998.1	5565556	44.5774	65.2361	0.978066	71.7992	68.5177	1.88477	2.56278	2.18775	-0.141186	0.557496	9060
(5115147,5124807)(5570557,5580557)(5570557,5580557)	NC_044998.1	5575557	34.6126	49.1816	4.08804	53.4768	51.3292	1.70506	2.29492	1.95147	-0.118797	0.49977	9660
(5124808,5134555)(5580558,5590558)(5580558,5590558)	NC_044998.1	5585558	37.0187	54.0495	1.39018	57.8608	55.9551	1.86577	2.51246	2.13636	-0.098612	0.529824	9747
(5134556,5144164)(5590559,5600559)(5590559,5600559)	NC_044998.1	5595559	37.8983	52.4577	3.85931	52.3286	52.3931	1.5586	2.26692	1.99576	0.003261	0.396261	9608
(5144165,5152434)(5600560,5610746)(5600560,5610560)	NC_044998.1	5605560	42.7354	57.2618	1.58725	60.8384	59.0501	1.38161	2.31293	2.15024	-0.080235	0.39611	8269
(5152434,5162102)(5610746,5620561)(5610561,5620561)	NC_044998.1	5615561	33.975	46.1709	13.9191	53.8903	50.0306	1.45365	1.6709	1.30509	-0.217479	0.48889	9668
(5162103,5171647)(5620562,5630562)(5620562,5630562)	NC_044998.1	5625562	33.2828	45.1178	12.0497	57.2228	51.1703	1.43943	1.74731	1.40901	-0.348071	0.555835	9544
(5171648,5181543)(5630563,5640563)(5630563,5640563)	NC_044998.1	5635563	37.49	48.0927	21.4717	53.5402	50.8165	1.14719	1.25477	0.948953	-0.139186	0.368235	9895
(5181544,5191017)(5640564,5650564)(5640564,5650564)	NC_044998.1	5645564	35.0941	49.0449	22.4236	56.3065	52.6757	1.61072	1.33699	0.799449	-0.198106	0.518523	9473
(5191018,5200665)(5650565,5660565)(5650565,5660565)	NC_044998.1	5655565	28.3947	34.0371	29.1816	51.6036	42.8203	0.801856	0.298558	-0.06069	-0.591256	0.524108	9647
(5200666,5210408)(5660566,5670566)(5660566,5670566)	NC_044998.1	5665566	29.0612	41.7007	21.4102	42.8974	42.299	1.75591	1.22039	0.577329	-0.039365	0.470111	9742
(5210409,5220244)(5670567,5680567)(5670567,5680567)	NC_044998.1	5675567	29.6317	35.2291	29.2446	55.9359	45.5825	0.762937	0.353336	0.028675	-0.668122	0.555725	9835
(5220245,5230070)(5680568,5690568)(5680568,5690568)	NC_044998.1	5685568	44.4196	50.5391	36.594	101.628	76.0838	0.560258	0.558078	0.394021	-1.10293	0.739954	9825
(5230071,5239673)(5690569,5700569)(5690569,5700569)	NC_044998.1	5695569	26.2184	37.6485	13.183	54.3354	45.9919	1.75607	1.62263	1.08374	-0.607803	0.77694	9602
(5239674,5249255)(5700570,5710570)(5700570,5710570)	NC_044998.1	5705570	42.2936	55.2066	33.9511	74.3707	64.7887	1.2408	0.891947	0.440318	-0.434385	0.551804	9581
(5249256,5259125)(5710571,5720571)(5710571,5720571)	NC_044998.1	5715571	29.1429	29.6016	36.4772	49.1147	39.3582	0.063557	-0.412432	-0.55197	-0.640069	0.361771	9869
(5259126,5268451)(5720572,5730572)(5720572,5730572)	NC_044998.1	5725572	27.7063	33.1805	28.395	51.1175	42.149	0.796859	0.301201	-0.054356	-0.618586	0.537539	9325
(5268452,5278162)(5730573,5740573)(5730573,5740573)	NC_044998.1	5735573	34.9303	45.6939	26.8467	73.597	59.6455	1.24846	0.950811	0.512313	-0.764781	0.732277	9710
(5278163,5287617)(5740574,5750574)(5740574,5750574)	NC_044998.1	5745574	49.2682	65.4827	20.3488	83.6719	74.5773	1.34024	1.63372	1.31773	-0.354238	0.533819	9454
(5287618,5296851)(5750575,5760575)(5750575,5760575)	NC_044998.1	5755575	35.2061	49.3294	13.0238	70.8111	60.0702	1.62553	1.81779	1.39536	-0.584202	0.730998	9233
(5296852,5306376)(5760576,5770576)(5760576,5770576)	NC_044998.1	5765576	41.1606	56.9337	18.1378	81.9762	69.455	1.55671	1.67124	1.24723	-0.583153	0.712936	9524
(5306377,5316276)(5770577,5780577)(5770577,5780577)	NC_044998.1	5775577	38.4355	48.4251	24.4811	66.4184	57.4217	1.0547	1.10186	0.807227	-0.448505	0.511887	9899
(5316277,5325970)(5780578,5790578)(5780578,5790578)	NC_044998.1	5785578	33.5551	43.2083	28.7375	55.5641	49.3862	1.16472	0.758692	0.317223	-0.352423	0.488002	9693
(5325971,5335520)(5790579,5800579)(5790579,5800579)	NC_044998.1	5795579	28.9245	38.9681	23.9933	46.476	42.7221	1.40173	0.904724	0.373761	-0.248117	0.492262	9549
(5335521,5345243)(5800580,5810580)(5800580,5810580)	NC_044998.1	5805580	35.7697	38.2439	42.5944	66.5258	52.3848	0.280362	-0.21453	-0.422851	-0.757109	0.48089	9722
(5345244,5355068)(5810581,5820581)(5810581,5820581)	NC_044998.1	5815581	43.5711	49.7949	47.0056	77.7517	63.7733	0.580757	0.113729	-0.176167	-0.615221	0.481193	9824
(5355069,5364877)(5820582,5830582)(5820582,5830582)	NC_044998.1	5825582	41.8471	55.086	32.079	74.6875	64.8868	1.28548	0.975389	0.520846	-0.449012	0.57112	9808
(5364878,5373834)(5830583,5840583)(5830583,5840583)	NC_044998.1	5835583	33.8086	38.2216	32.0022	64.1444	51.183	0.528527	0.323733	0.1181	-0.733894	0.531613	8956
(5373835,5383378)(5840584,5850584)(5840584,5850584)	NC_044998.1	5845584	41.96	51.5728	34.6844	82.6428	67.1078	0.930917	0.714128	0.386939	-0.709816	0.62172	9543
(5383379,5393252)(5850585,5860585)(5850585,5860585)	NC_044998.1	5855585	41.718	50.2123	40.132	61.9367	56.0745	0.827306	0.428633	0.084815	-0.269396	0.356967	9873
(5393253,5403114)(5860586,5870586)(5860586,5870586)	NC_044998.1	5865586	32.9057	38.8106	33.0107	60.1423	49.4764	0.726262	0.309825	-0.007047	-0.620353	0.520732	9861
(5403115,5412900)(5870587,5880587)(5870587,5880587)	NC_044998.1	5875587	39.1661	54.2035	33.6634	56.4659	55.3347	1.55848	0.928229	0.312634	-0.055348	0.427888	9785
(5412901,5422831)(5880588,5890588)(5880588,5890588)	NC_044998.1	5885588	39.1955	49.7005	34.4254	67.8834	58.7919	1.08795	0.689803	0.270817	-0.4445	0.518221	9930
(5422832,5432765)(5890589,5900589)(5890589,5900589)	NC_044998.1	5895589	29.9051	39.415	24.9414	48.4814	43.9482	1.28462	0.847107	0.364552	-0.289886	0.484863	9933
(5432766,5440258)(5900590,5910590)(5900590,5910590)	NC_044998.1	5905590	33.244	39.9953	26.7949	56.2019	48.0986	0.822072	0.698287	0.428431	-0.46655	0.462122	7492
(5440259,5449744)(5910591,5920591)(5910591,5920591)	NC_044998.1	5915591	41.1915	51.3168	41.7232	60.9682	56.1425	0.99857	0.412969	-0.028787	-0.224581	0.376444	9485
(5449745,5459484)(5920592,5930592)(5920592,5930592)	NC_044998.1	5925592	29.9844	43.1612	8.19707	60.8618	52.0115	1.77533	2.04122	1.59616	-0.564466	0.758542	9739
(5459485,5469241)(5930593,5940593)(5930593,5940593)	NC_044998.1	5935593	28.5301	34.5062	30.5143	45.5334	40.0198	0.845337	0.24435	-0.15235	-0.369412	0.415494	9756
(5469242,5476411)(5940594,5950594)(5940594,5950594)	NC_044998.1	5945594	17.7039	21.2903	16.4925	35.519	28.4046	0.807071	0.459743	0.144955	-0.763832	0.617223	7169
(5476412,5486326)(5950595,5960595)(5950595,5960595)	NC_044998.1	5955595	38.4648	46.6684	37.9084	70.6421	58.6552	0.865477	0.402821	0.032162	-0.597121	0.543942	9914
(5486327,5495887)(5960596,5970596)(5960596,5970596)	NC_044998.1	5965596	37.7703	39.3654	36.6777	65.4004	52.3829	0.171321	0.125777	0.064269	-0.660303	0.400817	9560
(5495888,5505452)(5970597,5980597)(5970597,5980597)	NC_044998.1	5975597	29.4717	32.7206	31.128	65.149	48.9348	0.445181	0.094517	-0.123334	-1.05196	0.681712	9564
(5505453,5514775)(5980598,5990598)(5980598,5990598)	NC_044998.1	5985598	35.1867	41.0426	31.0031	75.8681	58.4554	0.674352	0.502938	0.263308	-0.947609	0.684463	9322
(5514776,5524695)(5990599,6000599)(5990599,6000599)	NC_044998.1	5995599	40.6725	44.3997	51.5508	61.2304	52.8151	0.372207	-0.311619	-0.596101	-0.396601	0.309586	9919
(5524696,5534539)(6000600,6010600)(6000600,6010600)	NC_044998.1	6005600	37.5354	43.8263	29.3364	60.8958	52.3611	0.679858	0.682182	0.485161	-0.435609	0.409174	9843
(5534540,5543057)(6010601,6020601)(6010601,6020601)	NC_044998.1	6015601	31.0437	45.5777	4.23174	60.6295	53.1036	1.89269	2.33515	1.90077	-0.463759	0.734157	8517
(5543058,5551961)(6020602,6030602)(6020602,6030602)	NC_044998.1	6025602	42.0508	60.8977	3.75971	66.646	63.7718	1.82128	2.41105	2.03221	-0.131041	0.535856	8903
(5551962,5560116)(6030603,6040603)(6030603,6040603)	NC_044998.1	6035603	32.5516	45.3308	1.62777	58.0358	51.6833	1.58852	2.35888	2.09584	-0.373465	0.607651	8154
(5560117,5569778)(6040604,6050604)(6040604,6050604)	NC_044998.1	6045604	38.0358	54.6927	3.34696	73.9921	64.3424	1.77682	2.38675	2.02683	-0.48608	0.71661	9661
(5569779,5579469)(6050605,6060605)(6050605,6060605)	NC_044998.1	6055605	61.5247	90.9389	3.61034	92.2	91.5695	1.95183	2.54632	2.12788	-0.01969	0.508472	9690
(5579470,5589358)(6060606,6070606)(6060606,6070606)	NC_044998.1	6065606	36.1252	51.7613	1.96391	53.2894	52.5253	1.75464	2.43237	2.09672	-0.040508	0.47006	9888
(5589359,5599206)(6070607,6080607)(6070607,6080607)	NC_044998.1	6075607	26.9159	38.5963	1.3048	45.9771	42.2867	1.74909	2.41249	2.07738	-0.261939	0.588581	9847
(5599207,5609055)(6080608,6090608)(6080608,6090608)	NC_044998.1	6085608	36.8302	52.6427	2.21134	49.6739	51.1583	1.74103	2.41801	2.08596	0.077204	0.402912	9848
(5609056,5618687)(6090609,6100609)(6090609,6100609)	NC_044998.1	6095609	34.3115	47.747	3.83894	47.1063	47.4267	1.58597	2.25339	1.96442	0.017876	0.395493	9631
(5618688,5628063)(6100610,6110610)(6100610,6110610)	NC_044998.1	6105610	45.4887	65.4698	3.95666	82.3053	73.8876	1.78693	2.40571	2.04381	-0.354956	0.648217	9375
(5628064,5637714)(6110611,6120611)(6110611,6120611)	NC_044998.1	6115611	38.8369	56.3794	6.05828	68.0068	62.1931	1.83329	2.29264	1.87741	-0.286851	0.623276	9650
(5637715,5647229)(6120612,6130612)(6120612,6130612)	NC_044998.1	6125612	34.5933	47.204	3.50441	55.1653	51.1846	1.47669	2.22517	1.9886	-0.220317	0.496299	9514
(5647230,5656414)(6130613,6140667)(6130613,6140613)	NC_044998.1	6135613	28.7808	41.0005	1.98242	45.5807	43.2906	1.71378	2.36853	2.04075	-0.152111	0.520214	9184
(5656414,5666276)(6140667,6150614)(6140614,6150614)	NC_044998.1	6145614	42.7469	62.6514	12.0952	53.9238	58.2876	1.89262	2.09975	1.60132	0.195742	0.377218	9862
(5666277,5676119)(6150615,6160615)(6150615,6160615)	NC_044998.1	6155615	44.912	61.9214	19.9753	74.5287	68.2251	1.54044	1.66086	1.24231	-0.269204	0.538893	9842
(5676120,5686052)(6160616,6170616)(6160616,6170616)	NC_044998.1	6165616	41.2858	59.1272	19.8908	56.767	57.9471	1.75558	1.68527	1.15568	0.054797	0.418558	9932
(5686053,5695891)(6170617,6180617)(6170617,6180617)	NC_044998.1	6175617	42.3127	57.619	22.3818	59.6667	58.6428	1.47011	1.47801	1.0515	-0.046393	0.400399	9838
(5695892,5704623)(6180618,6190618)(6180618,6190618)	NC_044998.1	6185618	40.9665	55.8217	20.1128	70.1161	62.9689	1.47296	1.54529	1.13485	-0.334433	0.556991	8731
(5704624,5714332)(6190619,6200619)(6190619,6200619)	NC_044998.1	6195619	39.0128	56.5723	17.6911	51.6956	54.1339	1.82693	1.76374	1.21594	0.119772	0.401724	9708
(5714333,5722256)(6200620,6210620)(6200620,6210620)	NC_044998.1	6205620	39.7728	44.0132	26.1397	90.9627	67.488	0.432886	0.795849	0.76324	-1.13119	0.722411	7923
(5722257,5731868)(6210621,6220621)(6210621,6220621)	NC_044998.1	6215621	39.9375	55.3382	19.4882	64.3727	59.8554	1.56578	1.58993	1.14032	-0.216784	0.517056	9611
(5731869,5741733)(6220622,6230622)(6220622,6230622)	NC_044998.1	6225622	27.4213	41.3218	2.28403	41.5976	41.4597	2.04403	2.48127	2.00357	-0.00961	0.527831	9864
(5741734,5750864)(6230623,6240623)(6230623,6240623)	NC_044998.1	6235623	33.6021	52.1514	1.65797	58.3229	55.2371	2.235	2.64376	2.10062	-0.175783	0.665987	9130
(5750865,5758952)(6240624,6250624)(6240624,6250624)	NC_044998.1	6245624	22.4976	34.4519	3.9932	38.4261	36.439	2.13224	2.33398	1.77499	-0.168419	0.636447	8087
(5758953,5768501)(6250625,6260625)(6250625,6260625)	NC_044998.1	6255625	37.0585	56.6161	2.86222	70.4238	63.52	2.14034	2.56204	2.04838	-0.356868	0.739585	9548
(5768502,5778411)(6260626,6270626)(6260626,6270626)	NC_044998.1	6265626	22.7945	35.6742	1.82943	32.6996	34.1869	2.26816	2.56167	1.98664	0.124431	0.513449	9909
(5778412,5788215)(6270627,6280627)(6270627,6280627)	NC_044998.1	6275627	30.4034	46.9701	1.78937	43.0419	45.006	2.20191	2.60299	2.06896	0.123557	0.496046	9803
(5788216,5798140)(6280628,6290628)(6280628,6290628)	NC_044998.1	6285628	21.0905	33.322	2.24721	32.8751	33.0986	2.32312	2.5299	1.91917	0.020188	0.583934	9924
(5798141,5807908)(6290629,6300629)(6290629,6300629)	NC_044998.1	6295629	32.0455	49.2532	4.01739	56.3379	52.7956	2.17214	2.47847	1.92805	-0.211518	0.669301	9767
(5807909,5817562)(6300630,6310630)(6300630,6310630)	NC_044998.1	6305630	32.2528	48.129	3.43718	49.6847	48.9069	1.99144	2.43362	1.97013	-0.046149	0.533784	9653
(5817563,5827466)(6310631,6320631)(6310631,6320631)	NC_044998.1	6315631	33.072	50.8459	3.87758	46.8024	48.8241	2.17527	2.49693	1.94904	0.117002	0.492555	9903
(5827467,5837385)(6320632,6330632)(6320632,6330632)	NC_044998.1	6325632	25.1337	38.3907	2.42449	41.1163	39.7535	2.12255	2.4827	1.96431	-0.103516	0.598756	9918
(5837386,5847285)(6330633,6340633)(6330633,6340633)	NC_044998.1	6335633	28.4715	46.7705	1.08655	47.5414	47.1559	2.59367	2.80183	2.10679	-0.025876	0.677042	9899
(5847286,5856594)(6340634,6350634)(6340634,6350634)	NC_044998.1	6345634	17.6	24.7133	2.7493	30.2257	27.4695	1.60991	2.11617	1.78652	-0.29764	0.572549	9308
(5856595,5866007)(6350635,6360635)(6350635,6360635)	NC_044998.1	6355635	34.6864	49.5003	2.86536	64.8891	57.1947	1.73011	2.36852	2.03023	-0.424725	0.671512	9412
(5866008,5875781)(6360636,6370636)(6360636,6370636)	NC_044998.1	6365636	43.9078	58.3338	3.04859	79.7598	69.0468	1.33594	2.23744	2.08032	-0.467909	0.594242	9773
(5875782,5885208)(6370637,6380652)(6370637,6380637)	NC_044998.1	6375637	40.6513	55.6211	2.9243	66.2683	60.9447	1.49566	2.29749	2.06836	-0.251022	0.517664	9426
(5885208,5894406)(6380652,6390638)(6380638,6390638)	NC_044998.1	6385638	39.6916	41.202	11.1264	78.6723	59.9372	0.154492	1.3418	1.60234	-0.904631	0.528775	9198
(5894407,5903777)(6390639,6400639)(6390639,6400639)	NC_044998.1	6395639	44.3229	57.7723	15.9019	73.5038	65.638	1.23399	1.67918	1.43399	-0.340352	0.499185	9370
(5903778,5913695)(6400640,6410640)(6400640,6410640)	NC_044998.1	6405640	50.1419	73.2291	9.9656	78.1493	75.6892	1.87547	2.25121	1.79984	-0.094163	0.529545	9917
(5913696,5922462)(6410641,6420641)(6410641,6420641)	NC_044998.1	6415641	36.417	49.7026	6.26489	68.7325	59.2175	1.47913	2.1054	1.83649	-0.500444	0.648342	8766
(5922463,5932363)(6420642,6430642)(6420642,6430642)	NC_044998.1	6425642	38.1691	47.0115	18.5096	56.4852	51.7483	0.939989	1.32042	1.14485	-0.23778	0.368632	9900
(5932364,5942044)(6430643,6440643)(6430643,6440643)	NC_044998.1	6435643	34.0783	46.7578	10.5524	47.3908	47.0743	1.50678	1.87027	1.52648	-0.017778	0.394541	9680
(5942045,5951189)(6440644,6450644)(6440644,6450644)	NC_044998.1	6445644	29.0217	29.6146	14.3288	48.322	38.9683	0.082481	0.92057	1.11013	-0.616178	0.353701	9144
(5951190,5961077)(6450645,6460645)(6450645,6460645)	NC_044998.1	6455645	37.7532	46.1112	15.3869	52.4855	49.2984	0.898122	1.43847	1.31619	-0.161737	0.316819	9887
(5961078,5969947)(6460646,6470646)(6460646,6470646)	NC_044998.1	6465646	34.2438	36.2298	25.0983	64.687	50.4584	0.234888	0.572357	0.590672	-0.795483	0.489911	8869
(5969948,5979588)(6470647,6480647)(6470647,6480647)	NC_044998.1	6475647	46.0718	57.4472	12.3933	90.0445	73.7459	1.00461	1.74041	1.63713	-0.678628	0.623764	9640
(5979589,5989390)(6480648,6490648)(6480648,6490648)	NC_044998.1	6485648	41.2981	56.621	10.07	64.18	60.4005	1.50732	1.99886	1.68634	-0.175442	0.479743	9801
(5989391,5999095)(6490649,6500649)(6490649,6500649)	NC_044998.1	6495649	54.3245	67.2445	24.8952	78.1358	72.6902	0.96966	1.39407	1.22008	-0.192466	0.35164	9704
(5999096,6008819)(6500650,6510650)(6500650,6510650)	NC_044998.1	6505650	42.1379	46.4835	30.718	74.964	60.7238	0.419087	0.66393	0.604884	-0.647928	0.457576	9723
(6008820,6018590)(6510651,6520651)(6510651,6520651)	NC_044998.1	6515651	29.4515	37.4878	7.36719	48.6795	43.0837	1.10194	1.78876	1.64558	-0.363299	0.477803	9770
(6018591,6027816)(6520652,6530652)(6520652,6530652)	NC_044998.1	6525652	43.8579	55.8239	13.7332	73.919	64.8714	1.10937	1.70532	1.53545	-0.395614	0.497282	9225
(6027817,6037354)(6530653,6540653)(6530653,6540653)	NC_044998.1	6535653	49.9693	59.0878	11.6328	79.2301	69.159	0.743269	1.69434	1.72315	-0.3868	0.399126	9537
(6037355,6046938)(6540654,6550654)(6540654,6550654)	NC_044998.1	6545654	40.4271	52.1422	23.2759	55.9603	54.0513	1.17688	1.26526	0.945304	-0.090513	0.349445	9583
(6046939,6056623)(6550655,6560655)(6550655,6560655)	NC_044998.1	6555655	41.1254	43.7568	21.0942	81.8151	62.7859	0.259924	0.977061	1.08606	-0.886998	0.546244	9684
(6056624,6066261)(6560656,6570656)(6560656,6570656)	NC_044998.1	6565656	41.2259	49.9603	18.2346	77.0341	63.4972	0.860697	1.36458	1.24363	-0.629462	0.560295	9637
(6066262,6076056)(6570657,6580657)(6570657,6580657)	NC_044998.1	6575657	39.2505	46.0625	13.5359	60.9207	53.4916	0.704511	1.46687	1.45796	-0.36272	0.37608	9794
(6076057,6085888)(6580658,6590658)(6580658,6590658)	NC_044998.1	6585658	36.6719	42.0181	14.8906	60.5483	51.2832	0.591147	1.30607	1.31784	-0.483939	0.412628	9831
(6085889,6095029)(6590659,6600659)(6590659,6600659)	NC_044998.1	6595659	44.0365	53.2207	23.236	74.7911	64.0059	0.848059	1.21008	1.05607	-0.469695	0.470676	9140
(6095030,6104827)(6600660,6610660)(6600660,6610660)	NC_044998.1	6605660	40.6224	56.8502	8.04393	60.6372	58.7437	1.62249	2.12933	1.78731	-0.089345	0.46258	9797
(6104828,6114345)(6610661,6620661)(6610661,6620661)	NC_044998.1	6615661	42.5677	53.8194	14.1231	65.1893	59.5043	1.07429	1.65541	1.49202	-0.256069	0.412809	9517
(6114346,6124174)(6620662,6630662)(6620662,6630662)	NC_044998.1	6625662	44.5607	58.3282	15.5177	75.0533	66.6907	1.25653	1.70802	1.45786	-0.35993	0.515535	9828
(6124175,6133359)(6630663,6640663)(6630663,6640663)	NC_044998.1	6635663	34.5669	46.7472	12.8296	46.7493	46.7482	1.42736	1.72834	1.39144	-5.8e-05	0.364658	9184
(6133360,6143057)(6640664,6650664)(6640664,6650664)	NC_044998.1	6645664	33.2415	44.8997	10.4399	49.5567	47.2282	1.41965	1.823	1.51487	-0.134076	0.435154	9697
(6143058,6152387)(6650665,6660665)(6650665,6660665)	NC_044998.1	6655665	51.008	69.6378	14.8601	68.0647	68.8512	1.48799	1.91709	1.5928	0.029597	0.363635	9329
(6152388,6161982)(6660666,6670666)(6660666,6670666)	NC_044998.1	6665666	46.876	62.3241	12.0346	72.296	67.31	1.34119	1.91036	1.66565	-0.204061	0.45276	9594
(6161983,6171391)(6670667,6680667)(6670667,6680667)	NC_044998.1	6675667	47.7405	58.0341	18.6863	85.8802	71.9571	0.87771	1.46847	1.36473	-0.559566	0.526954	9408
(6171392,6180423)(6680668,6690668)(6680668,6690668)	NC_044998.1	6685668	33.8135	49.3122	8.7991	52.6271	50.9696	1.85597	2.1085	1.63515	-0.093835	0.52486	9031
(6180424,6189246)(6690669,6700669)(6690669,6700669)	NC_044998.1	6695669	31.9192	41.074	19.8815	49.9508	45.5124	1.16011	1.16553	0.831178	-0.266061	0.440163	8822
(6189247,6199014)(6700670,6710670)(6700670,6710670)	NC_044998.1	6705670	38.8508	55.1457	18.1025	62.0058	58.5757	1.70231	1.68711	1.18796	-0.169181	0.526188	9767
(6199015,6208224)(6710671,6720671)(6710671,6720671)	NC_044998.1	6715671	33.6812	51.2698	17.9592	59.4879	55.3789	2.11436	1.74017	1.03156	-0.233534	0.666368	9209
(6208225,6216958)(6720672,6730672)(6720672,6730672)	NC_044998.1	6725672	36.2101	54.7134	10.124	62.5337	58.6236	2.0716	2.17308	1.59751	-0.206822	0.640924	8733
(6216959,6226462)(6730673,6740673)(6730673,6740673)	NC_044998.1	6735673	56.7696	81.0356	18.0303	78.1066	79.5711	1.74361	1.98701	1.53897	0.049541	0.41793	9503
(6226463,6235654)(6740674,6750674)(6740674,6750674)	NC_044998.1	6745674	56.1632	81.4586	5.47149	95.7876	88.6231	1.83699	2.42162	2.03487	-0.244963	0.601327	9191
(6235655,6245182)(6750675,6760675)(6750675,6760675)	NC_044998.1	6755675	39.6056	57.2601	10.4802	54.9113	56.0857	1.80974	2.09143	1.63716	0.056828	0.431352	9527
(6245183,6254621)(6760676,6770676)(6760676,6770676)	NC_044998.1	6765676	45.0434	60.7086	17.2679	58.7976	59.7531	1.41461	1.71517	1.37985	0.040687	0.339038	9438
(6254622,6264466)(6770677,6780677)(6770677,6780677)	NC_044998.1	6775677	37.1401	44.891	16.4508	42.333	43.612	0.846409	1.35266	1.2367	0.065968	0.180495	9844
(6264467,6273767)(6780678,6790678)(6780678,6790678)	NC_044998.1	6785678	41.3687	50.0284	21.9219	63.8452	56.9368	0.850432	1.20488	1.04842	-0.320136	0.390322	9300
(6273768,6283593)(6790679,6800679)(6790679,6800679)	NC_044998.1	6795679	47.2031	63.9727	9.06802	74.302	69.1373	1.44596	2.07167	1.81094	-0.209916	0.482664	9825
(6283594,6293365)(6800680,6810680)(6800680,6810680)	NC_044998.1	6805680	55.5435	67.4214	22.7727	85.8088	76.6151	0.872102	1.43836	1.32971	-0.317836	0.394673	9771
(6293366,6302338)(6810681,6820681)(6810681,6820681)	NC_044998.1	6815681	46.1405	53.8587	16.7009	66.4935	60.1761	0.680632	1.43332	1.42902	-0.262647	0.315893	8972
(6302339,6311603)(6820682,6830682)(6820682,6830682)	NC_044998.1	6825682	47.5233	58.4176	15.2219	65.7617	62.0896	0.93312	1.61922	1.52394	-0.14825	0.318397	9264
(6311604,6321405)(6830683,6840683)(6830683,6840683)	NC_044998.1	6835683	52.9469	63.4644	38.51	81.9173	72.6908	0.809644	0.842243	0.613594	-0.334531	0.387772	9801
(6321406,6330484)(6840684,6850684)(6840684,6850684)	NC_044998.1	6845684	71.0135	83.9439	37.983	97.4729	90.7084	0.744376	1.16478	1.0554	-0.183102	0.289085	9078
(6330485,6340421)(6850685,6860685)(6850685,6860685)	NC_044998.1	6855685	45.0518	51.3451	27.8098	60.3738	55.8595	0.568199	0.92908	0.856406	-0.192195	0.249056	9936
(6340422,6349459)(6860686,6870686)(6860686,6870686)	NC_044998.1	6865686	45.941	54.6078	25.7802	51.2956	52.9517	0.767554	1.11667	0.982712	0.06915	0.158465	9037
(6349460,6358767)(6870687,6880687)(6870687,6880687)	NC_044998.1	6875687	48.9955	60.8544	18.649	58.0362	59.4453	0.985603	1.53596	1.39019	0.055189	0.221621	9307
(6358768,6368491)(6880697,6890688)(6880688,6890688)	NC_044998.1	6885688	44.4853	54.1622	21.6709	63.7119	58.9371	0.884664	1.29843	1.14707	-0.205858	0.337226	9723
(6368492,6378273)(6890689,6900689)(6890689,6900689)	NC_044998.1	6895689	39.9632	48.9656	14.8397	62.2186	55.5921	0.914696	1.51253	1.4001	-0.317803	0.405459	9781
(6378274,6387958)(6900690,6910690)(6900690,6910690)	NC_044998.1	6905690	50.3182	55.8822	27.7018	64.8886	60.3854	0.450425	0.999378	1.00975	-0.171761	0.20795	9684
(6387959,6397863)(6910691,6920691)(6910691,6920691)	NC_044998.1	6915691	54.2231	58.3424	37.4824	74.3079	66.3252	0.30973	0.687929	0.695292	-0.282657	0.232142	9904
(6397864,6407710)(6920692,6930692)(6920692,6930692)	NC_044998.1	6925692	51.6992	68.8712	16.8739	85.8111	77.3411	1.35343	1.79614	1.51468	-0.314475	0.515648	9846
(6407711,6417344)(6930693,6940693)(6930693,6940693)	NC_044998.1	6935693	45.3883	44.3865	37.8989	63.0076	53.697	-0.089787	0.254264	0.369339	-0.393469	0.190067	9633
(6417345,6426967)(6940694,6950694)(6940694,6950694)	NC_044998.1	6945694	51.1652	59.3571	20.6136	56.6198	57.9884	0.652311	1.35188	1.34221	0.051343	0.13863	9622
(6426968,6436403)(6950695,6960695)(6950695,6960695)	NC_044998.1	6955695	44.6305	52.7888	19.6318	52.0039	52.3963	0.743445	1.32087	1.25296	0.016866	0.180631	9435
(6436404,6446060)(6960696,6970696)(6960696,6970696)	NC_044998.1	6965696	53.3443	67.8913	13.9552	92.7922	80.3418	1.1116	1.80723	1.66204	-0.44808	0.52632	9656
(6446061,6455790)(6970697,6980697)(6970697,6980697)	NC_044998.1	6975697	61.0362	69.9202	27.3983	65.0577	67.489	0.59419	1.24954	1.24553	0.07652	0.110074	9729
(6455791,6465552)(6980698,6990698)(6980698,6990698)	NC_044998.1	6985698	48.8853	58.8033	26.2067	73.0809	65.9421	0.826134	1.18887	1.04117	-0.280225	0.362552	9761
(6465553,6475436)(6990699,7000699)(6990699,7000699)	NC_044998.1	6995699	46.2947	59.7285	25.1762	58.1266	58.9276	1.18076	1.32851	1.02182	0.033189	0.283385	9883
(6475437,6485275)(7000700,7010700)(7000700,7010700)	NC_044998.1	7005700	46.6022	51.478	31.548	72.6748	62.0764	0.425771	0.761396	0.723766	-0.436294	0.344857	9838
(6485276,6495100)(7010701,7020701)(7010701,7020701)	NC_044998.1	7015701	52.5878	66.1627	25.1133	74.602	70.3824	1.05206	1.39467	1.17543	-0.154035	0.351852	9824
(6495101,6503850)(7020702,7030702)(7020702,7030702)	NC_044998.1	7025702	46.751	50.4357	31.6371	69.7552	60.0955	0.320747	0.715958	0.724409	-0.396396	0.296457	8749
(6503851,6513598)(7030703,7040703)(7030703,7040703)	NC_044998.1	7035703	55.3775	67.9961	29.0561	72.2835	70.1398	0.929232	1.25811	1.07113	-0.07433	0.27732	9747
(6513599,6523354)(7040704,7050704)(7040704,7050704)	NC_044998.1	7045704	61.148	75.405	11.687	90.7599	83.0824	0.951815	1.86905	1.82817	-0.241196	0.373482	9755
(6523355,6533034)(7050705,7060705)(7050705,7060705)	NC_044998.1	7055705	39.6987	46.6244	17.5589	64.9221	55.7733	0.708313	1.29652	1.2417	-0.441676	0.419766	9679
(6533035,6542566)(7060706,7070706)(7060706,7070706)	NC_044998.1	7065706	31.2804	37.7698	14.299	49.2129	43.4914	0.838818	1.31601	1.19522	-0.349923	0.403355	9531
(6542567,6552387)(7070707,7080707)(7070707,7080707)	NC_044998.1	7075707	37.974	46.8885	20.2309	60.256	53.5722	0.952443	1.24109	1.03833	-0.337221	0.425587	9820
(6552388,6562237)(7080708,7090708)(7080708,7090708)	NC_044998.1	7085708	43.7336	55.5893	11.2789	66.6816	61.1354	1.10221	1.80018	1.65874	-0.243197	0.412966	9849
(6562238,6571873)(7090709,7100709)(7090709,7100709)	NC_044998.1	7095709	44.4063	44.8911	33.173	84.6579	64.7745	0.044399	0.469089	0.565756	-0.858752	0.476122	9635
(6571874,6581214)(7100710,7110710)(7100710,7110710)	NC_044998.1	7105710	49.9569	58.6884	28.1623	59.1074	58.8979	0.711889	1.09017	0.979862	-0.008049	0.186009	9340
(6581215,6591072)(7110711,7120711)(7110711,7120711)	NC_044998.1	7115711	40.5791	41.7449	22.9044	52.3607	47.0528	0.11668	0.822823	0.970657	-0.250725	0.165428	9857
(6591073,6600852)(7120712,7130712)(7120712,7130712)	NC_044998.1	7125712	45.5781	51.1418	18.7885	81.5187	66.3302	0.496597	1.2629	1.31584	-0.639214	0.472757	9779
(6600853,6609253)(7130713,7140713)(7130713,7140713)	NC_044998.1	7135713	37.8751	43.1583	16.7103	50.0035	46.5809	0.565919	1.23442	1.24165	-0.173132	0.238145	8400
(6609254,6618157)(7140714,7150714)(7140714,7150714)	NC_044998.1	7145714	49.1615	60.9141	16.3343	62.8569	61.8855	0.973511	1.61706	1.49893	-0.037918	0.26895	8903
(6618158,6627963)(7150715,7160715)(7150715,7160715)	NC_044998.1	7155715	57.6746	71.3894	22.8365	102.684	87.0367	0.970163	1.5078	1.36292	-0.521047	0.529807	9805
(6627964,6637155)(7160716,7170716)(7160716,7170716)	NC_044998.1	7165716	37.8484	45.6926	12.0247	57.8446	51.7686	0.840829	1.57247	1.51599	-0.30757	0.381049	9191
(6637156,6646984)(7170717,7180717)(7170717,7180717)	NC_044998.1	7175717	47.8771	56.6057	13.3732	75.6691	66.1374	0.742171	1.60899	1.61625	-0.381991	0.396222	9828
(6646985,6656343)(7180718,7190718)(7180718,7190718)	NC_044998.1	7185718	43.4992	50.7648	18.3018	66.9749	58.8698	0.67907	1.32574	1.29449	-0.357307	0.366709	9358
(6656344,6666149)(7190719,7200719)(7190719,7200719)	NC_044998.1	7195719	58.2045	74.3011	23.2462	88.2507	81.2759	1.1284	1.57143	1.35554	-0.230152	0.412541	9805
(6666150,6675958)(7200720,7210720)(7200720,7210720)	NC_044998.1	7205720	57.3086	70.4527	9.08505	86.8657	78.6592	0.935669	1.91762	1.89827	-0.27501	0.387688	9808
(6675959,6681114)(7210721,7223101)(7210721,7220721)	NC_044998.1	7215721	35.8531	45.2959	5.06505	43.2062	44.2511	1.06755	1.97941	1.90336	0.055812	0.242503	5155
(6681114,6688510)(7223101,7230722)(7220722,7230722)	NC_044998.1	7225722	29.6816	38.3641	7.13141	51.8912	45.1277	1.18151	1.8411	1.66798	-0.435734	0.537252	7396
(6688511,6697926)(7230723,7240723)(7230723,7240723)	NC_044998.1	7235723	44.322	53.6774	15.9598	62.7248	58.2011	0.858374	1.51266	1.43106	-0.195745	0.325043	9415
(6697927,6706655)(7240724,7250724)(7240724,7250724)	NC_044998.1	7245724	37.9695	42.9282	13.8409	64.5008	53.7145	0.529861	1.35436	1.41216	-0.544275	0.429643	8728
(6706656,6715933)(7250725,7260725)(7250725,7260725)	NC_044998.1	7255725	50.808	61.0278	22.3709	67.4157	64.2218	0.819448	1.35807	1.2578	-0.120654	0.274431	9277
(6715934,6725496)(7260726,7270726)(7260726,7270726)	NC_044998.1	7265726	33.7312	44.6774	13.2199	49.3471	47.0123	1.31395	1.64103	1.3439	-0.132504	0.407287	9562
(6725497,6735396)(7270727,7280728)(7270727,7280727)	NC_044998.1	7275727	36.1843	49.4015	14.4348	51.6852	50.5434	1.48082	1.70528	1.33284	-0.060441	0.410895	9899
(6735396,6745205)(7280728,7290728)(7280728,7290728)	NC_044998.1	7285728	34.5303	46.5553	13.4844	61.1952	53.8753	1.41064	1.68691	1.34854	-0.40587	0.579713	9809
(6745206,6753987)(7290729,7300729)(7290729,7300729)	NC_044998.1	7295729	39.1294	49.6681	15.1701	52.9372	51.3026	1.09326	1.56042	1.36246	-0.08005	0.322454	8781
(6753988,6763764)(7300730,7310730)(7300730,7310730)	NC_044998.1	7305730	49.5095	60.4926	16.6414	67.5366	64.0146	0.903459	1.57978	1.4906	-0.136519	0.304465	9776
(6763765,6772949)(7310731,7320731)(7310731,7320731)	NC_044998.1	7315731	37.3859	46.8689	10.3355	57.4866	52.1777	1.02885	1.7266	1.60678	-0.272037	0.40985	9184
(6772950,6782869)(7320732,7330732)(7320732,7330732)	NC_044998.1	7325732	44.0128	54.6871	15.9835	54.3122	54.4997	0.986177	1.56275	1.42382	0.008168	0.247305	9919
(6782870,6792667)(7330733,7340733)(7330733,7340733)	NC_044998.1	7335733	43.8885	52.0593	13.9119	68.1427	60.101	0.756994	1.54451	1.52688	-0.351388	0.383401	9797
(6792668,6802451)(7340734,7350734)(7340734,7350734)	NC_044998.1	7345734	41.5735	46.909	18.7017	61.9564	54.4327	0.521424	1.20345	1.22724	-0.346944	0.320833	9783
(6802452,6812103)(7350735,7360735)(7350735,7360735)	NC_044998.1	7355735	46.6032	55.6338	18.3345	70.0723	62.853	0.788565	1.42494	1.35906	-0.29718	0.362135	9651
(6812104,6822067)(7360736,7370736)(7360736,7370736)	NC_044998.1	7365736	42.3103	50.809	7.9232	71.6342	61.2216	0.816308	1.79893	1.81427	-0.471852	0.463711	9963
(6822068,6831693)(7370737,7380737)(7370737,7380737)	NC_044998.1	7375737	36.9273	37.8533	21.3521	55.0008	46.427	0.101698	0.789176	0.936128	-0.444751	0.266445	9625
(6831694,6841423)(7380738,7390738)(7380738,7390738)	NC_044998.1	7385738	45.891	57.1738	9.07996	65.8974	61.5356	1.0003	1.86493	1.7962	-0.182325	0.353999	9729
(6841424,6850536)(7390739,7400739)(7390739,7400739)	NC_044998.1	7395739	42.4168	54.7583	11.8489	59.3552	57.0568	1.18249	1.79555	1.60888	-0.103897	0.358088	9112
(6850537,6860293)(7400740,7410740)(7400740,7410740)	NC_044998.1	7405740	47.8251	57.4535	12.0574	85.392	71.4227	0.819551	1.69128	1.67721	-0.560436	0.512584	9756
(6860294,6869196)(7410741,7420741)(7410741,7420741)	NC_044998.1	7415741	56.3459	65.837	19.0844	72.0547	68.9458	0.687043	1.48524	1.49106	-0.105953	0.232667	8902
(6869197,6878259)(7420742,7430742)(7420742,7430742)	NC_044998.1	7425742	48.2592	62.5941	8.57002	81.471	72.0325	1.20934	1.99517	1.84494	-0.375275	0.511804	9062
(6878260,6887907)(7430743,7440743)(7430743,7440743)	NC_044998.1	7435743	37.7098	49.7211	2.92012	59.8672	54.7942	1.29217	2.19359	2.04952	-0.257735	0.469361	9647
(6887908,6895654)(7440744,7451725)(7440744,7450744)	NC_044998.1	7445744	36.1203	46.452	5.63691	52.0785	49.2652	1.15954	1.99389	1.87122	-0.149169	0.376807	7746
(6895654,6900711)(7451725,7460745)(7450745,7460745)	NC_044998.1	7455745	41.2503	48.5478	10.2924	41.8267	45.1873	0.718682	1.6445	1.67361	0.156173	0.098988	5057
(6900712,6909213)(7460746,7470746)(7460746,7470746)	NC_044998.1	7465746	45.0918	54.1235	17.4563	71.752	62.9378	0.814732	1.44624	1.37148	-0.374929	0.410891	8501
(6909214,6919118)(7470747,7480747)(7470747,7480747)	NC_044998.1	7475747	45.4658	60.6349	11.9907	58.7617	59.6983	1.35726	1.90335	1.64813	0.039513	0.325025	9904
(6919119,6928922)(7480748,7490748)(7480748,7490748)	NC_044998.1	7485748	39.0474	50.0225	12.9798	44.5728	47.2976	1.14088	1.67891	1.48533	0.133725	0.218993	9803
(6928923,6938840)(7490749,7500749)(7490749,7500749)	NC_044998.1	7495749	43.3414	57.6144	10.8476	67.6026	62.6085	1.33879	1.9166	1.67517	-0.220959	0.461323	9917
(6938841,6948671)(7500750,7510750)(7500750,7510750)	NC_044998.1	7505750	42.7036	52.3625	8.26063	47.4093	49.8859	0.919321	1.83347	1.80114	0.111199	0.174508	9830
(6948672,6958208)(7510751,7520751)(7510751,7520751)	NC_044998.1	7515751	43.0093	50.6156	29.7406	62.7831	56.6994	0.718896	0.861886	0.689123	-0.271237	0.330293	9536
(6958209,6967444)(7520752,7530752)(7520752,7530752)	NC_044998.1	7525752	46.5654	55.179	28.643	59.793	57.486	0.752747	1.01455	0.86232	-0.095046	0.243566	9235
(6967445,6977141)(7530753,7540753)(7530753,7540753)	NC_044998.1	7535753	52.7331	63.4772	20.4848	75.0018	69.2395	0.830411	1.45677	1.37599	-0.209771	0.325491	9696
(6977142,6985987)(7540754,7550754)(7540754,7550754)	NC_044998.1	7545754	37.8199	40.4972	26.0644	38.1547	39.3259	0.287202	0.67458	0.69061	0.059335	0.041258	8845
(6985988,6995506)(7550755,7560755)(7550755,7560755)	NC_044998.1	7555755	52.2279	62.4036	21.6853	70.1628	66.2832	0.79399	1.39269	1.3154	-0.142593	0.279812	9518
(6995507,7005397)(7560756,7570756)(7560756,7570756)	NC_044998.1	7565756	40.3821	45.5626	22.074	61.3109	53.4368	0.520993	1.03065	1.01014	-0.373747	0.335205	9890
(7005398,7013125)(7570757,7580757)(7570757,7580757)	NC_044998.1	7575757	35.7546	41.7016	11.5642	56.8939	49.2977	0.674158	1.48673	1.49941	-0.40687	0.392142	7727
(7013126,7022510)(7580758,7590758)(7580758,7590758)	NC_044998.1	7585758	45.8331	53.3181	20.4495	58.8989	56.1085	0.664431	1.2761	1.2401	-0.116787	0.232798	9384
(7022511,7031514)(7590759,7600759)(7590759,7600759)	NC_044998.1	7595759	44.3661	54.238	19.4367	59.876	57.057	0.904878	1.39436	1.25665	-0.121861	0.296924	9003
(7031515,7041417)(7600760,7610760)(7600760,7610760)	NC_044998.1	7605760	45.4258	55.038	17.234	69.7775	62.4077	0.860797	1.48046	1.38918	-0.311193	0.388151	9902
(7041418,7051324)(7610761,7620761)(7610761,7620761)	NC_044998.1	7615761	46.7152	52.6116	27.8787	66.8823	59.7469	0.513659	0.942667	0.903498	-0.293028	0.289729	9906
(7051325,7061200)(7620762,7630762)(7620762,7630762)	NC_044998.1	7625762	35.4731	41.2371	15.3782	45.9092	43.5732	0.658512	1.28538	1.25498	-0.12611	0.236373	9875
(7061201,7071078)(7630763,7640763)(7630763,7640763)	NC_044998.1	7635763	35.4067	39.9687	21.6144	36.2937	38.1312	0.522143	0.913984	0.862902	0.09938	0.079652	9877
(7071079,7080844)(7640764,7650764)(7640764,7650764)	NC_044998.1	7645764	42.3074	44.8268	23.8548	61.3871	53.107	0.242002	0.879768	0.973628	-0.375246	0.264826	9765
(7080845,7090074)(7650765,7660765)(7650765,7660765)	NC_044998.1	7655765	53.2931	64.0775	16.6013	75.4152	69.7464	0.824861	1.59226	1.54966	-0.204212	0.321064	9229
(7090075,7099911)(7660766,7670766)(7660766,7670766)	NC_044998.1	7665766	31.8379	41.2668	3.28529	52.6519	46.9593	1.19782	2.09397	1.97628	-0.342105	0.490877	9836
(7099912,7109301)(7670767,7680767)(7670767,7680767)	NC_044998.1	7675767	40.2713	54.9636	7.82435	52.8333	53.8984	1.48158	2.0739	1.79497	0.050694	0.350856	9389
(7109302,7118959)(7680768,7690768)(7680768,7690768)	NC_044998.1	7685768	34.9098	47.0157	5.38346	61.5701	54.2929	1.40495	2.10146	1.87234	-0.399146	0.574626	9657
(7118960,7128709)(7690769,7700769)(7690769,7700769)	NC_044998.1	7695769	53.039	66.148	26.9952	66.2706	66.2093	1.00741	1.31923	1.10505	-0.002219	0.258221	9749
(7128710,7138432)(7700770,7710770)(7700770,7710770)	NC_044998.1	7705770	43.4288	49.0031	17.7192	54.0114	51.5072	0.521828	1.27959	1.32286	-0.110573	0.193043	9722
(7138433,7148125)(7710771,7720771)(7710771,7720771)	NC_044998.1	7715771	43.3604	52.9549	14.8186	64.753	58.8539	0.899563	1.56225	1.47082	-0.260883	0.37081	9692
(7148126,7157968)(7720772,7730772)(7720772,7730772)	NC_044998.1	7725772	39.5331	44.6488	21.0163	51.4066	48.0277	0.525351	1.05843	1.04267	-0.163802	0.222743	9842
(7157969,7167825)(7730773,7740773)(7730773,7740773)	NC_044998.1	7735773	35.9275	39.385	19.9535	37.029	38.207	0.390085	0.954154	0.985584	0.062794	0.065689	9856
(7167826,7177500)(7740774,7750774)(7740774,7750774)	NC_044998.1	7745774	40.933	48.4636	13.891	50.6491	49.5563	0.747294	1.4973	1.47278	-0.051174	0.218476	9674
(7177501,7187403)(7750775,7760775)(7750775,7760775)	NC_044998.1	7755775	32.1115	37.5284	15.1168	37.2412	37.3848	0.682405	1.22552	1.16678	0.008558	0.169748	9902
(7187404,7197151)(7760776,7770776)(7760776,7770776)	NC_044998.1	7765776	24.0142	29.5451	12.7563	30.9929	30.269	0.925782	1.20985	1.01618	-0.057522	0.267869	9747
(7197152,7207073)(7770777,7780777)(7770777,7780777)	NC_044998.1	7775777	21.3637	22.9254	10.9018	28.9994	25.9624	0.292923	0.967154	1.0529	-0.270894	0.22083	9921
(7207074,7216959)(7780778,7790778)(7780778,7790778)	NC_044998.1	7785778	32.4099	40.5112	10.4358	51.9733	46.2422	1.01135	1.63011	1.49546	-0.338391	0.441227	9885
(7216960,7226763)(7790779,7800779)(7790779,7800779)	NC_044998.1	7795779	37.2198	41.4782	11.3157	57.3999	49.4391	0.464043	1.43163	1.54525	-0.409738	0.340062	9803
(7226764,7236296)(7800780,7810780)(7800780,7810780)	NC_044998.1	7805780	36.8497	46.7951	4.73359	53.536	50.1655	1.09446	2.01567	1.93418	-0.175205	0.37425	9532
(7236297,7245923)(7810781,7820781)(7810781,7820781)	NC_044998.1	7815781	47.0213	56.5609	10.1029	64.7701	60.6655	0.825697	1.75953	1.75969	-0.167472	0.301391	9626
(7245924,7255812)(7820782,7830782)(7820782,7830782)	NC_044998.1	7825782	50.768	62.7796	13.0573	75.6099	69.1948	0.963869	1.74816	1.66925	-0.242529	0.377286	9888
(7255813,7265297)(7830783,7840783)(7830783,7840783)	NC_044998.1	7835783	26.623	34.9794	6.71176	43.0003	38.9898	1.26478	1.84778	1.63175	-0.287758	0.478668	9484
(7265298,7275231)(7840784,7850784)(7840784,7850784)	NC_044998.1	7845784	22.0383	27.7723	3.92029	34.4575	31.1149	1.04349	1.86347	1.77157	-0.289138	0.422811	9933
(7275232,7285052)(7850785,7860785)(7850785,7860785)	NC_044998.1	7855785	34.1938	41.5295	13.7492	37.5603	39.5449	0.868848	1.43041	1.32228	0.111115	0.16191	9820
(7285053,7294993)(7860786,7870786)(7860786,7870786)	NC_044998.1	7865786	22.9113	25.519	5.46754	28.2545	26.8868	0.456943	1.5104	1.64512	-0.113855	0.178276	9940
(7294994,7304399)(7870787,7880787)(7870787,7880787)	NC_044998.1	7875787	35.2569	44.8211	6.32545	64.2927	54.5569	1.09924	1.92478	1.8174	-0.52878	0.566609	9405
(7304400,7314276)(7880788,7890788)(7880788,7890788)	NC_044998.1	7885788	33.8916	32.8574	18.643	40.736	36.7967	-0.123568	0.73815	0.994586	-0.222508	0.088674	9876
(7314277,7323735)(7890789,7900789)(7890789,7900789)	NC_044998.1	7895789	36.2107	38.7044	14.4929	52.5686	45.6365	0.279185	1.17994	1.32997	-0.366657	0.26953	9458
(7323736,7333257)(7900790,7910790)(7900790,7910790)	NC_044998.1	7905790	36.3791	39.9604	24.7371	48.6728	44.3166	0.39913	0.738603	0.709793	-0.229351	0.225937	9521
(7333258,7343148)(7910791,7920791)(7910791,7920791)	NC_044998.1	7915791	32.4019	36.5754	18.3182	39.4865	38.0309	0.521138	0.989786	0.958697	-0.085964	0.1796	9890
(7343149,7352025)(7920792,7930792)(7920792,7930792)	NC_044998.1	7925792	28.1086	30.0915	20.0767	44.3761	37.2338	0.284609	0.621753	0.625429	-0.485641	0.334852	8876
(7352026,7361585)(7930793,7940793)(7930793,7940793)	NC_044998.1	7935793	39.1105	43.1823	25.6216	45.5673	44.3748	0.422596	0.794677	0.76741	-0.05843	0.139511	9559
(7361586,7371169)(7940794,7950794)(7940794,7950794)	NC_044998.1	7945794	56.9864	71.3059	26.8513	97.3737	84.3398	1.02504	1.39678	1.19274	-0.439237	0.499471	9583
(7371170,7380387)(7950795,7960795)(7950795,7960795)	NC_044998.1	7955795	42.4085	47.7254	16.9652	61.026	54.3757	0.509526	1.28741	1.3394	-0.300668	0.292767	9217
(7380388,7390298)(7960796,7970796)(7960796,7970796)	NC_044998.1	7965796	47.786	59.8661	21.2051	69.998	64.932	1.02907	1.44151	1.24741	-0.203407	0.372745	9910
(7390299,7399788)(7970797,7980797)(7970797,7980797)	NC_044998.1	7975797	38.2397	47.078	21.9951	59.2628	53.1704	0.937852	1.15996	0.944313	-0.305262	0.40458	9489
(7399789,7409619)(7980798,7990798)(7980798,7990798)	NC_044998.1	7985798	41.367	45.4736	33.1924	54.6299	50.0517	0.403306	0.526495	0.440725	-0.212162	0.217752	9830
(7409620,7419447)(7990799,8000799)(7990799,8000799)	NC_044998.1	7995799	34.0062	40.0695	23.5587	47.6043	43.8369	0.72204	0.854633	0.679249	-0.212088	0.299073	9827
(7419448,7429009)(8000800,8010800)(8000800,8010800)	NC_044998.1	8005800	41.021	51.6179	19.9507	51.8186	51.7183	1.04936	1.36863	1.14518	-0.00469	0.270446	9561
(7429010,7438930)(8010801,8020801)(8010801,8020801)	NC_044998.1	8015801	44.642	55.5005	26.1421	61.4836	58.4921	0.98925	1.16925	0.927004	-0.128527	0.322065	9920
(7438931,7448852)(8020802,8030802)(8020802,8030802)	NC_044998.1	8025802	35.777	39.1691	20.7382	33.2262	36.1976	0.384288	0.908677	0.931605	0.159059	0.012172	9921
(7448853,7458723)(8030803,8040803)(8030803,8040803)	NC_044998.1	8035803	50.7121	60.8858	31.2715	60.4385	60.6622	0.817274	1.04231	0.861448	0.008466	0.203948	9870
(7458724,7468575)(8040804,8050804)(8040804,8050804)	NC_044998.1	8045804	25.0114	29.4688	12.5295	25.7204	27.5946	0.717077	1.1747	1.0846	0.143052	0.106305	9851
(7468576,7478363)(8050805,8060805)(8050805,8060805)	NC_044998.1	8055805	31.3584	37.6153	12.897	49.7654	43.6903	0.806771	1.38265	1.29633	-0.370628	0.40635	9787
(7478364,7488211)(8060806,8070806)(8060806,8070806)	NC_044998.1	8065806	45.622	47.1404	35.8174	65.3349	56.2376	0.1354	0.441577	0.481131	-0.382497	0.241608	9847
(7488212,7497994)(8070807,8080807)(8070807,8080807)	NC_044998.1	8075807	38.478	42.1176	25.0693	57.5907	49.8541	0.383845	0.7837	0.774845	-0.385263	0.306376	9782
(7497995,7507746)(8080808,8090808)(8080808,8090808)	NC_044998.1	8085808	54.5734	66.6458	23.8853	83.5613	75.1035	0.901964	1.40136	1.26664	-0.297565	0.391306	9751
(7507747,7516455)(8090809,8100809)(8090809,8100809)	NC_044998.1	8095809	39.5449	42.4081	23.3528	60.2857	51.3469	0.293953	0.853186	0.91151	-0.433203	0.309378	8708
(7516456,7526282)(8100810,8110810)(8100810,8110810)	NC_044998.1	8105810	33.8003	37.6232	20.1005	44.0951	40.8592	0.457976	0.912314	0.895866	-0.183268	0.216037	9826
(7526283,7536111)(8110811,8120811)(8110811,8120811)	NC_044998.1	8115811	33.7569	39.6517	16.1012	51.6158	45.6337	0.707059	1.22765	1.15596	-0.339226	0.363949	9828
(7536112,7545954)(8120812,8130812)(8120812,8130812)	NC_044998.1	8125812	42.6036	42.2664	15.9664	68.5847	55.4255	-0.032171	1.09586	1.39609	-0.592233	0.312258	9842
(7545955,7555774)(8130813,8140813)(8130813,8140813)	NC_044998.1	8135813	31.8235	34.9169	16.0534	47.9555	41.4362	0.393162	1.04042	1.092	-0.391966	0.312193	9819
(7555775,7565609)(8140814,8150814)(8140814,8150814)	NC_044998.1	8145814	28.5103	30.4567	25.5098	44.8526	37.6547	0.275519	0.303006	0.230538	-0.482595	0.330908	9834
(7565610,7575554)(8150815,8160815)(8150815,8160815)	NC_044998.1	8155815	38.0403	41.3998	21.8679	54.9881	48.1939	0.358323	0.907814	0.94483	-0.3422	0.27656	9944
(7575555,7585381)(8160816,8170816)(8160816,8170816)	NC_044998.1	8165816	42.4775	46.3782	29.3116	68.9048	57.6415	0.373211	0.713165	0.692006	-0.508408	0.37038	9826
(7585382,7595116)(8170817,8180817)(8170817,8180817)	NC_044998.1	8175817	40.2726	44.2813	24.3008	43.1169	43.6991	0.404222	0.879017	0.883538	0.02771	0.088217	9734
(7595117,7604960)(8180818,8190818)(8180818,8190818)	NC_044998.1	8185818	39.0721	43.1057	23.9138	53.9807	48.5432	0.419033	0.869314	0.863196	-0.266685	0.25124	9843
(7604961,7614052)(8190819,8200819)(8190819,8200819)	NC_044998.1	8195819	39.8123	42.3692	23.0589	52.8678	47.6185	0.260766	0.859003	0.937039	-0.2527	0.203273	9091
(7614053,7623914)(8200820,8210820)(8200820,8210820)	NC_044998.1	8205820	44.0664	49.5225	28.0732	67.593	58.5577	0.50347	0.865046	0.811462	-0.39322	0.34133	9861
(7623915,7633062)(8210821,8220821)(8210821,8220821)	NC_044998.1	8215821	37.2325	41.3284	22.388	74.5368	57.9326	0.446178	0.898687	0.885226	-0.854313	0.575888	9147
(7633063,7642380)(8220822,8231233)(8220822,8230822)	NC_044998.1	8225822	31.6646	35.6968	14.6962	46.4634	41.0801	0.514998	1.16386	1.18057	-0.325277	0.3073	9317
(7642380,7651638)(8231233,8240823)(8230823,8240823)	NC_044998.1	8235823	37.4046	43.5049	16.4974	60.0899	51.7974	0.661529	1.27579	1.24128	-0.424714	0.398599	9258
(7651639,7661504)(8240824,8250824)(8240824,8250824)	NC_044998.1	8245824	37.9406	40.1957	21.1791	64.2296	52.2127	0.241154	0.886101	0.981707	-0.606832	0.389743	9865
(7661505,7670706)(8250825,8260825)(8250825,8260825)	NC_044998.1	8255825	28.9886	31.6806	10.6444	46.4311	39.0558	0.374889	1.26825	1.3875	-0.486398	0.358392	9201
(7670707,7680571)(8260826,8270826)(8260826,8270826)	NC_044998.1	8265826	28.9952	28.8352	21.6985	48.1016	38.4684	-0.022281	0.430175	0.551785	-0.635166	0.337169	9864
(7680572,7690374)(8270827,8280827)(8270827,8280827)	NC_044998.1	8275827	31.0541	33.7537	20.4152	51.7931	42.7734	0.35143	0.753091	0.753983	-0.555623	0.389889	9802
(7690375,7700289)(8280828,8290828)(8280828,8290828)	NC_044998.1	8285828	32.2052	33.4561	20.6354	38.013	35.7345	0.157131	0.699117	0.792143	-0.13538	0.113284	9914
(7700290,7709829)(8290829,8300829)(8290829,8300829)	NC_044998.1	8295829	50.9531	68.0083	14.9303	77.9289	72.9686	1.36368	1.85955	1.58893	-0.18685	0.449144	9539
(7709830,7719733)(8300830,8310830)(8300830,8310830)	NC_044998.1	8305830	39.8698	44.8985	15.4735	47.5968	46.2477	0.512122	1.30713	1.36263	-0.064857	0.165843	9903
(7719734,7729699)(8310831,8320831)(8310831,8320831)	NC_044998.1	8315831	26.3758	31.3043	11.4429	36.8196	34.0619	0.752776	1.30982	1.23454	-0.199702	0.300233	9965
(7729700,7739554)(8320832,8330832)(8320832,8330832)	NC_044998.1	8325832	28.6154	33.2639	12.1818	36.6028	34.9333	0.655635	1.28679	1.25827	-0.11152	0.227803	9854
(7739555,7749471)(8330833,8340833)(8330833,8340833)	NC_044998.1	8335833	32.8645	42.83	11.8586	49.1031	45.9665	1.22719	1.65645	1.41078	-0.182656	0.412237	9916
(7749472,7759263)(8340834,8350834)(8340834,8350834)	NC_044998.1	8345834	27.0764	30.8171	9.36062	34.1896	32.5033	0.556901	1.38027	1.42896	-0.118986	0.206599	9791
(7759264,7768159)(8350835,8360858)(8350835,8360835)	NC_044998.1	8355835	40.647	48.9965	15.5954	55.1251	52.0608	0.834303	1.45638	1.37358	-0.144506	0.291186	8895
(7768159,7777912)(8360858,8370836)(8360836,8370836)	NC_044998.1	8365836	46.6656	54.8469	28.6187	65.1709	60.0089	0.713455	1.00069	0.866513	-0.212213	0.296968	9753
(7777913,7787727)(8370837,8380837)(8370837,8380837)	NC_044998.1	8375837	48.9088	54.7903	24.5482	57.0108	55.9005	0.489672	1.10248	1.11788	-0.043561	0.148542	9814
(7787728,7797661)(8380838,8390838)(8380838,8390838)	NC_044998.1	8385838	39.6995	46.3866	22.3339	46.6505	46.5185	0.683899	1.07289	0.97392	-0.006368	0.178067	9933
(7797662,7807464)(8390839,8400839)(8390839,8400839)	NC_044998.1	8395839	49.6278	57.1098	26.0147	61.6255	59.3676	0.614009	1.11764	1.06842	-0.087311	0.203958	9802
(7807465,7816722)(8400840,8410840)(8400840,8410840)	NC_044998.1	8405840	30.9434	34.5371	18.2845	40.0606	37.2988	0.469475	0.920756	0.900177	-0.170731	0.212185	9257
(7816723,7826079)(8410841,8420841)(8410841,8420841)	NC_044998.1	8415841	30.6094	35.5861	9.24041	28.2326	31.9094	0.657101	1.5081	1.53525	0.229753	0.043867	9356
(7826080,7835942)(8420842,8430842)(8420842,8430842)	NC_044998.1	8425842	36.6811	39.424	21.2323	33.189	36.3065	0.303223	0.875641	0.934483	0.162796	-0.010575	9862
(7835943,7845686)(8430843,8440843)(8430843,8440843)	NC_044998.1	8435843	43.0441	53.6396	16.4763	61.8593	57.7495	1.00061	1.5332	1.37876	-0.183087	0.354505	9743
(7845687,7855439)(8440844,8450844)(8440844,8450844)	NC_044998.1	8445844	43.1896	49.3355	24.9994	43.3248	46.3302	0.578471	1.00073	0.94094	0.133433	0.075457	9752
(7855440,7865152)(8450845,8460845)(8450845,8460845)	NC_044998.1	8455845	37.008	41.5231	22.0295	31.0018	36.2625	0.49479	0.930337	0.898394	0.2723	-0.020865	9712
(7865153,7875037)(8460846,8470846)(8460846,8470846)	NC_044998.1	8465846	40.8499	45.0526	27.226	55.3815	50.217	0.417889	0.773566	0.743441	-0.242341	0.237798	9884
(7875038,7884884)(8470847,8480861)(8470847,8480847)	NC_044998.1	8475847	31.2665	38.6827	13.4282	42.739	40.7109	0.959029	1.41662	1.25606	-0.124093	0.312104	9846
(7884884,7894741)(8480861,8490848)(8480848,8490848)	NC_044998.1	8485848	30.1824	36.1432	20.8104	27.3858	31.7645	0.797942	0.889531	0.682341	0.277452	0.054131	9857
(7894742,7904425)(8490849,8500849)(8490849,8500849)	NC_044998.1	8495849	54.6737	63.7888	29.2255	66.5375	65.1631	0.679777	1.1307	1.0485	-0.048265	0.199565	9683
(7904426,7914103)(8500850,8510850)(8500850,8510850)	NC_044998.1	8505850	42.7691	52.3593	18.6216	49.4384	50.8989	0.911419	1.40053	1.2609	0.065475	0.197232	9677
(7914104,7924067)(8510851,8520851)(8510851,8520851)	NC_044998.1	8515851	37.3579	41.5267	25.5138	60.7853	51.156	0.452625	0.757333	0.704039	-0.49379	0.382599	9963
(7924068,7933390)(8520852,8530852)(8520852,8530852)	NC_044998.1	8525852	43.8283	50.001	24.0882	55.479	52.74	0.572645	1.05055	1.00681	-0.119847	0.211033	9322
(7933391,7943307)(8530853,8540853)(8530853,8540853)	NC_044998.1	8535853	43.9208	52.7211	20.6239	52.7904	52.7557	0.814723	1.29863	1.18581	-0.001513	0.208781	9916
(7943308,7952726)(8540854,8550854)(8540854,8550854)	NC_044998.1	8545854	29.3072	38.2563	6.19002	34.9966	36.6264	1.23302	1.91324	1.73055	0.106333	0.25778	9418
(7952727,7961404)(8550855,8560855)(8550855,8560855)	NC_044998.1	8555855	34.7839	43.3759	16.2056	44.6115	43.9937	1.00069	1.37623	1.18216	-0.034008	0.274007	8677
(7961405,7971062)(8560856,8571059)(8560856,8570856)	NC_044998.1	8565856	47.8566	64.5437	9.1472	65.3715	64.9576	1.41946	2.06255	1.814	-0.016595	0.371223	9657
(7971062,7980758)(8571059,8580857)(8570857,8580857)	NC_044998.1	8575857	48.4087	66.4317	12.7303	59.7595	63.0956	1.51583	1.97731	1.65356	0.132237	0.315219	9696
(7980759,7990301)(8580858,8590858)(8580858,8590858)	NC_044998.1	8585858	42.9311	53.378	15.2279	73.0366	63.2073	0.989139	1.57791	1.44132	-0.43902	0.490073	9542
(7990302,7999679)(8590859,8600859)(8590859,8600859)	NC_044998.1	8595859	41.7368	49.6584	6.89002	48.7307	49.1946	0.771175	1.8178	1.86277	0.021306	0.185349	9377
(7999680,8009579)(8600860,8610860)(8600860,8610860)	NC_044998.1	8605860	39.3046	49.9306	12.8019	52.745	51.3378	1.09747	1.6722	1.50066	-0.068613	0.317341	9899
(8009580,8019173)(8610861,8620861)(8610861,8620861)	NC_044998.1	8615861	35.0344	45.0396	4.32475	55.409	50.2243	1.1571	2.04814	1.94078	-0.283373	0.448738	9593
(8019174,8028346)(8620862,8630862)(8620862,8630862)	NC_044998.1	8625862	34.0536	42.4376	6.72018	43.9839	43.2107	0.997036	1.84635	1.77475	-0.043464	0.2782	9172
(8028347,8038230)(8630863,8640863)(8630863,8640863)	NC_044998.1	8635863	47.884	56.0679	16.5044	67.1551	61.6115	0.695753	1.47223	1.4697	-0.222132	0.297823	9883
(8038231,8048052)(8640864,8650864)(8640864,8650864)	NC_044998.1	8645864	30.3152	36.84	8.55504	47.965	42.4025	0.869695	1.6341	1.57771	-0.350936	0.411778	9821
(8048053,8057327)(8650865,8660865)(8650865,8660865)	NC_044998.1	8655865	36.0007	45.5293	12.6526	45.7062	45.6178	1.07292	1.61121	1.43776	-0.004704	0.276584	9274
(8057328,8067238)(8660866,8670866)(8660866,8670866)	NC_044998.1	8665866	42.8098	51.303	17.6659	58.4045	54.8537	0.806401	1.39506	1.31173	-0.159037	0.291915	9910
(8067239,8076984)(8670867,8680867)(8670867,8680867)	NC_044998.1	8675867	33.7412	40.0623	10.5139	45.6083	42.8353	0.758546	1.541	1.52142	-0.157324	0.278806	9745
(8076985,8086878)(8680868,8690868)(8680868,8690868)	NC_044998.1	8685868	38.7659	49.0074	14.786	45.5211	47.2643	1.07223	1.56189	1.37587	0.086166	0.227195	9893
(8086879,8096672)(8690869,8700869)(8690869,8700869)	NC_044998.1	8695869	49.4957	66.7101	6.7395	76.9498	71.8299	1.41643	2.16108	1.93956	-0.198507	0.468928	9793
(8096673,8106576)(8700870,8710870)(8700870,8710870)	NC_044998.1	8705870	42.7474	53.1357	9.6256	49.4101	51.2729	0.987755	1.80708	1.73035	0.083557	0.206934	9903
(8106577,8109975)(8710871,8721654)(8710871,8720871)	NC_044998.1	8715871	20.6276	28.9741	1.34748	28.4811	28.7276	1.61978	2.29636	2.0044	0.022762	0.402523	3398
(8109975,8119096)(8721654,8730872)(8720872,8730872)	NC_044998.1	8725872	47.488	57.5201	20.938	65.2502	61.3851	0.859894	1.37229	1.2535	-0.156158	0.303991	9121
(8119097,8128827)(8730873,8740873)(8730873,8740873)	NC_044998.1	8735873	42.3738	53.3983	10.7658	75.8339	64.6161	1.05736	1.78571	1.66524	-0.507584	0.544582	9730
(8128828,8138555)(8740874,8750874)(8740874,8750874)	NC_044998.1	8745874	35.0903	41.34	14.598	45.3014	43.3207	0.721647	1.34319	1.2931	-0.108086	0.24276	9727
(8138556,8148026)(8750875,8760875)(8750875,8760875)	NC_044998.1	8755875	31.5672	35.0038	17.3981	35.6348	35.3193	0.440244	0.978578	0.988691	-0.019122	0.122829	9470
(8148027,8157808)(8760876,8770876)(8760876,8770876)	NC_044998.1	8765876	47.0621	56.1238	22.8004	57.0879	56.6059	0.78366	1.26101	1.15545	-0.019651	0.210634	9781
(8157809,8167631)(8770877,8780877)(8770877,8780877)	NC_044998.1	8775877	47.0821	55.6261	14.9571	61.7117	58.6689	0.738578	1.53835	1.52931	-0.12399	0.255617	9822
(8167632,8177352)(8780878,8790878)(8780878,8790878)	NC_044998.1	8785878	53.1146	67.1123	14.6678	64.8285	65.9704	1.0742	1.76464	1.62906	0.041274	0.2517	9720
(8177353,8187166)(8790879,8800879)(8790879,8800879)	NC_044998.1	8795879	47.7857	62.8978	9.41033	56.2933	59.5955	1.28737	1.99433	1.80092	0.132592	0.256741	9813
(8187167,8197026)(8800880,8810880)(8800880,8810880)	NC_044998.1	8805880	39.3392	46.7189	17.2323	52.2532	49.486	0.761526	1.32688	1.2507	-0.134803	0.267362	9859
(8197027,8206859)(8810881,8820881)(8810881,8820881)	NC_044998.1	8815881	52.4058	65.7564	17.5602	66.511	66.1337	1.03823	1.64302	1.49579	-0.01382	0.272376	9832
(8206860,8216649)(8820882,8831083)(8820882,8830882)	NC_044998.1	8825882	62.8201	76.463	11.495	103.171	89.817	0.886811	1.85618	1.84797	-0.408412	0.447542	9789
(8216649,8226278)(8831083,8840883)(8830883,8840883)	NC_044998.1	8835883	50.9809	64.6468	10.0821	79.7093	72.178	1.09209	1.91062	1.80306	-0.283542	0.432213	9629
(8226279,8235702)(8840884,8850884)(8840884,8850884)	NC_044998.1	8845884	44.9288	57.0277	9.12387	62.026	59.5268	1.09531	1.89606	1.78311	-0.106689	0.337314	9423
(8235703,8245576)(8850885,8860885)(8850885,8860885)	NC_044998.1	8855885	46.3518	61.5208	2.64854	62.9741	62.2474	1.33165	2.2609	2.11208	-0.030074	0.356141	9873
(8245577,8255172)(8860886,8870886)(8860886,8870886)	NC_044998.1	8865886	55.5931	69.987	4.6767	65.7781	67.8825	1.05591	2.10215	2.06421	0.072689	0.229979	9595
(8255173,8265092)(8870887,8880887)(8870887,8880887)	NC_044998.1	8875887	43.0604	55.1916	1.14644	40.0486	47.6201	1.14522	2.22886	2.17437	0.337168	0.109881	9919
(8265093,8274627)(8880888,8890888)(8880888,8890888)	NC_044998.1	8885888	45.8001	55.0401	2.28996	79.6293	67.3347	0.820804	2.04942	2.12714	-0.51493	0.488232	9534
(8274628,8284538)(8890889,8900889)(8890889,8900889)	NC_044998.1	8895889	41.1808	53.0053	1.4191	43.1218	48.0636	1.16645	2.22116	2.15302	0.230042	0.173341	9910
(8284539,8294347)(8900890,8910890)(8900890,8910890)	NC_044998.1	8905890	57.0338	75.6616	2.46718	64.3508	70.0062	1.33235	2.29793	2.15799	0.190428	0.23668	9808
(8294348,8304210)(8910891,8920891)(8910891,8920891)	NC_044998.1	8915891	49.4484	66.8218	4.75988	65.8428	66.3323	1.43086	2.23852	2.02909	0.018997	0.354829	9862
(8304211,8314086)(8920892,8930892)(8920892,8930892)	NC_044998.1	8925892	37.3671	47.4729	2.13796	54.1378	50.8053	1.09696	2.14361	2.0936	-0.170848	0.372529	9875
(8314087,8323991)(8930893,8940893)(8930893,8940893)	NC_044998.1	8935893	36.0965	44.603	2.11346	42.1072	43.3551	0.955322	2.077	2.08736	0.066211	0.208209	9904
(8323992,8333837)(8940894,8950894)(8940894,8950894)	NC_044998.1	8945894	36.3387	44.639	4.78793	42.789	43.714	0.926052	1.93555	1.92563	0.048754	0.210164	9845
(8333838,8343679)(8950895,8960895)(8950895,8960895)	NC_044998.1	8955895	49.3158	65.9933	2.96214	55.7147	60.854	1.3772	2.27941	2.11016	0.199987	0.243131	9841
(8343680,8353565)(8960896,8970896)(8960896,8970896)	NC_044998.1	8965896	49.4107	65.2094	4.24589	62.8279	64.0187	1.30216	2.20053	2.05223	0.046247	0.307232	9885
(8353566,8363307)(8970897,8980897)(8970897,8980897)	NC_044998.1	8975897	48.7887	65.3914	1.09246	59.8652	62.6283	1.38564	2.34963	2.19392	0.108676	0.294743	9741
(8363308,8372989)(8980898,8990898)(8980898,8990898)	NC_044998.1	8985898	59.5714	80.2371	2.51282	94.8933	87.5652	1.4158	2.33875	2.16319	-0.236287	0.489168	9681
(8372990,8382897)(8990899,9000899)(8990899,9000899)	NC_044998.1	8995899	43.3935	54.716	1.33185	56.9512	55.8336	1.06078	2.18526	2.16593	-0.04939	0.297507	9907
(8382898,8392576)(9000900,9010900)(9000900,9010900)	NC_044998.1	9005900	52.6015	67.2259	4.0846	77.5687	72.3973	1.13311	2.14471	2.07516	-0.188727	0.391321	9678
(8392577,8402126)(9010901,9021159)(9010901,9020901)	NC_044998.1	9015901	48.6287	65.3656	1.94291	70.3439	67.8547	1.40137	2.32501	2.15426	-0.098222	0.410793	9549
(8402126,8411595)(9021159,9030902)(9020902,9030902)	NC_044998.1	9025902	55.861	73.2408	2.13734	82.1967	77.7187	1.2689	2.27792	2.16789	-0.153932	0.407092	9469
(8411596,8421439)(9030903,9040903)(9030903,9040903)	NC_044998.1	9035903	44.6107	54.4384	3.79568	66.3573	60.3978	0.89596	2.0183	2.04656	-0.256212	0.367363	9843
(8421440,8431215)(9040904,9050904)(9040904,9050904)	NC_044998.1	9045904	42.2855	52.5492	3.90279	46.4459	49.4975	0.986407	2.04172	2.02622	0.138367	0.176944	9775
(8431216,8441074)(9050905,9060905)(9050905,9060905)	NC_044998.1	9055905	36.1798	45.6316	5.81454	53.8807	49.7562	1.05908	1.94206	1.86105	-0.218343	0.388543	9858
(8441075,8450850)(9060906,9070907)(9060906,9070906)	NC_044998.1	9065906	39.6283	54.1425	2.58617	50.5879	52.3652	1.48699	2.3037	2.08102	0.085953	0.333189	9775
(8450850,8460680)(9070907,9080907)(9070907,9080907)	NC_044998.1	9075907	43.8519	56.7169	4.05152	44.5917	50.6543	1.19288	2.13404	2.02889	0.26513	0.161001	9830
(8460681,8470489)(9080908,9090908)(9080908,9090908)	NC_044998.1	9085908	57.5449	71.9644	5.16833	75.0539	73.5092	1.02229	2.0789	2.05353	-0.051556	0.288701	9808
(8470490,8480250)(9090909,9100909)(9090909,9100909)	NC_044998.1	9095909	46.7166	58.5229	2.55584	63.4778	61.0003	1.02847	2.13307	2.11813	-0.10174	0.317556	9760
(8480251,8490034)(9100910,9110910)(9100910,9110910)	NC_044998.1	9105910	42.8263	53.1334	3.96628	54.1169	53.6252	0.978258	2.0384	2.02653	-0.022018	0.261639	9783
(8490035,8499840)(9110911,9120912)(9110911,9120911)	NC_044998.1	9115911	47.416	58.8183	4.97609	59.7503	59.2843	0.97881	2.02273	2.00664	-0.018856	0.260002	9805
(8499840,8509581)(9120912,9130912)(9120912,9130912)	NC_044998.1	9125912	48.5222	63.0517	9.6134	61.7362	62.394	1.21919	1.96316	1.7992	0.026012	0.297034	9741
(8509582,8519446)(9130913,9140913)(9130913,9140913)	NC_044998.1	9135913	39.5071	51.9252	9.44857	49.5789	50.752	1.27609	1.9036	1.69365	0.056908	0.295053	9864
(8519447,8529337)(9140914,9150914)(9140914,9150914)	NC_044998.1	9145914	42.1162	49.1871	18.1372	55.4518	52.3194	0.682252	1.30825	1.27073	-0.142592	0.251326	9890
(8529338,8539188)(9150915,9160915)(9150915,9160915)	NC_044998.1	9155915	34.5494	43.1592	8.97541	58.3323	50.7457	1.00945	1.74275	1.63782	-0.420422	0.485091	9850
(8539189,8549026)(9160916,9170916)(9160916,9170916)	NC_044998.1	9165916	32.7309	41.9901	4.64245	41.3062	41.6481	1.14477	2.00527	1.89377	0.019992	0.281694	9837
(8549027,8558603)(9170917,9180917)(9170917,9180917)	NC_044998.1	9175917	40.373	53.8749	7.03881	48.3543	51.1146	1.35816	2.05555	1.8396	0.131047	0.275873	9576
(8558604,8568476)(9180918,9190918)(9180918,9190918)	NC_044998.1	9185918	36.6422	45.3343	9.14164	44.5368	44.9356	0.961865	1.74387	1.66517	0.020844	0.234392	9872
(8568477,8578406)(9190919,9200919)(9190919,9200919)	NC_044998.1	9195919	29.4104	37.008	4.23467	26.3047	31.6564	1.04321	1.94889	1.87841	0.347928	0.078829	9929
(8578407,8588334)(9200920,9210920)(9200920,9210920)	NC_044998.1	9205920	24.7231	31.5327	0.981587	31.1029	31.3178	1.10793	2.14198	2.08551	0.01659	0.274485	9927
(8588335,8598197)(9210921,9220921)(9210921,9220921)	NC_044998.1	9215921	25.477	33.1294	3.75685	29.2135	31.1714	1.20909	2.0017	1.85502	0.146742	0.230134	9862
(8598198,8608041)(9220922,9230922)(9220922,9230922)	NC_044998.1	9225922	36.9013	48.2921	2.06498	54.3422	51.3172	1.25181	2.21232	2.09521	-0.157029	0.404609	9843
(8608042,8617968)(9230923,9240923)(9230923,9240923)	NC_044998.1	9235923	29.0408	40.1498	3.00706	46.6379	43.3939	1.54435	2.23548	1.96577	-0.213564	0.510065	9926
(8617969,8627843)(9240924,9250924)(9240924,9250924)	NC_044998.1	9245924	41.9979	62.8149	4.59845	53.1136	57.9643	2.01416	2.45954	1.98729	0.221434	0.394379	9874
(8627844,8637502)(9250925,9260925)(9250925,9260925)	NC_044998.1	9255925	30.4925	39.145	8.61628	46.424	42.7845	1.14673	1.75394	1.5774	-0.228289	0.416355	9658
(8637503,8646848)(9260926,9270926)(9260926,9270926)	NC_044998.1	9265926	37.6772	48.4828	17.077	46.8954	47.6891	1.16344	1.47323	1.2146	0.040359	0.275292	9345
(8646849,8656698)(9270927,9280927)(9270927,9280927)	NC_044998.1	9275927	28.811	42.7787	8.12864	41.3124	42.0456	1.95693	2.10128	1.57345	0.048647	0.474006	9849
(8656699,8666428)(9280928,9290928)(9280928,9290928)	NC_044998.1	9285928	28.4827	41.6263	7.53393	47.4705	44.5484	1.86223	2.09012	1.61104	-0.196104	0.581923	9729
(8666429,8675273)(9290929,9300929)(9290929,9300929)	NC_044998.1	9295929	34.5886	49.2747	11.3989	59.3141	54.2944	1.71995	1.92887	1.48352	-0.277864	0.589544	8844
(8675274,8685177)(9300930,9310930)(9300930,9310930)	NC_044998.1	9305930	27.3634	40.8146	6.57067	36.0913	38.453	1.98204	2.18094	1.66059	0.164911	0.41782	9903
(8685178,8695047)(9310931,9320931)(9310931,9320931)	NC_044998.1	9315931	35.7758	48.404	12.0486	61.5316	54.9678	1.43071	1.79245	1.46986	-0.351367	0.555379	9869
(8695048,8704790)(9320932,9330932)(9320932,9330932)	NC_044998.1	9325932	23.7538	31.2938	11.0738	34.7899	33.0418	1.27555	1.47217	1.15626	-0.140408	0.402042	9742
(8704791,8713924)(9330933,9340933)(9330933,9340933)	NC_044998.1	9335933	36.2062	53.0323	6.20614	64.6184	58.8254	1.88402	2.28233	1.83738	-0.306448	0.646875	9133
(8713925,8723794)(9340934,9350934)(9340934,9350934)	NC_044998.1	9345934	26.2125	30.7913	17.9837	55.7312	43.2612	0.703624	0.849619	0.684272	-0.908613	0.670027	9869
(8723795,8733182)(9350935,9360935)(9350935,9360935)	NC_044998.1	9355935	29.5155	36.7638	13.4838	48.9802	42.872	0.99178	1.37966	1.19213	-0.395707	0.467143	9387
(8733183,8743055)(9360936,9370936)(9360936,9370936)	NC_044998.1	9365936	32.6978	42.2679	9.16973	48.8182	45.5431	1.18439	1.77883	1.58783	-0.191693	0.406186	9872
(8743056,8752862)(9370937,9380937)(9370937,9380937)	NC_044998.1	9375937	33.6194	43.6448	8.98443	53.2089	48.4268	1.20735	1.81387	1.61919	-0.272277	0.455583	9806
(8752863,8762527)(9380938,9390938)(9380938,9390938)	NC_044998.1	9385938	42.0687	48.9484	20.5087	69.273	59.1107	0.664546	1.19958	1.14378	-0.463137	0.420248	9664
(8762528,8772374)(9390939,9400939)(9390939,9400939)	NC_044998.1	9395939	42.834	55.3642	7.99246	71.9046	63.6344	1.18904	1.96362	1.81665	-0.370216	0.503869	9846
(8772375,8782211)(9400940,9410940)(9400940,9410940)	NC_044998.1	9405940	27.5379	37.0845	14.5294	30.2423	33.6634	1.39798	1.42785	1.03271	0.237394	0.229354	9836
(8782212,8792110)(9410941,9420941)(9410941,9420941)	NC_044998.1	9415941	29.1857	38.1808	16.7789	50.1789	44.1799	1.2444	1.28201	0.932422	-0.39299	0.530247	9898
(8792111,8802004)(9420942,9430942)(9420942,9430942)	NC_044998.1	9425942	29.3332	38.4155	20.6585	40.6157	39.5156	1.25027	1.05858	0.648847	-0.071707	0.358303	9893
(8802005,8811880)(9430943,9440943)(9430943,9440943)	NC_044998.1	9435943	30.2634	35.9644	17.3327	64.652	50.3082	0.761153	1.07815	0.939054	-0.906476	0.684013	9875
(8811881,8821384)(9440944,9450944)(9440944,9450944)	NC_044998.1	9445944	30.9937	37.2654	23.7749	48.7763	43.0208	0.818022	0.763095	0.512545	-0.355226	0.4009	9503
(8821385,8831110)(9450945,9460945)(9450945,9460945)	NC_044998.1	9455945	27.4934	35.6019	19.6296	38.431	37.0165	1.18926	1.01268	0.625237	-0.098316	0.357132	9725
(8831111,8840806)(9460946,9470946)(9460946,9470946)	NC_044998.1	9465946	33.7938	49.6298	12.3927	56.9365	53.2832	1.89744	1.93908	1.39973	-0.206948	0.596582	9695
(8840807,8850612)(9470947,9480947)(9470947,9480947)	NC_044998.1	9475947	42.7037	56.7188	5.05823	62.9538	59.8363	1.33394	2.14771	1.9686	-0.139979	0.41627	9805
(8850613,8860424)(9480948,9490948)(9480948,9490948)	NC_044998.1	9485948	24.9917	31.5672	7.82898	38.4553	35.0112	1.05861	1.64741	1.49244	-0.263077	0.412636	9811
(8860425,8870336)(9490949,9500949)(9490949,9500949)	NC_044998.1	9495949	36.4876	42.9489	17.126	65.4742	54.2116	0.717996	1.24929	1.17709	-0.591226	0.503025	9911
(8870337,8870540)(9500950,9512197)(9500950,9510950)	NC_044998.1	9505950	0.003094	0.001037	0.010197	0.001869	0.001453	-0.135232	-0.172266	-0.155364	-0.019606	-0.030897	203
(8870540,8879184)(9512197,9520951)(9510951,9520951)	NC_044998.1	9515951	38.3789	43.7022	15.7691	69.7539	56.7281	0.562851	1.28726	1.30977	-0.650318	0.49543	8644
(8879185,8888926)(9520952,9530952)(9520952,9530952)	NC_044998.1	9525952	43.9911	56.1572	14.1261	69.1521	62.6547	1.12454	1.69792	1.51779	-0.283255	0.440345	9741
(8888927,8898723)(9530953,9540953)(9530953,9540953)	NC_044998.1	9535953	30.6329	37.5649	9.25071	47.2341	42.3995	0.914579	1.6196	1.53509	-0.301876	0.396761	9796
(8898724,8908452)(9540954,9550954)(9540954,9550954)	NC_044998.1	9545954	36.8198	42.8969	14.7369	56.3882	49.6425	0.669302	1.35054	1.33097	-0.350938	0.360682	9728
(8908453,8918258)(9550955,9560955)(9550955,9560955)	NC_044998.1	9555955	39.0042	48.6266	8.24562	54.5514	51.589	1.00134	1.83216	1.75448	-0.145546	0.334412	9805
(8918259,8928062)(9560956,9570956)(9560956,9570956)	NC_044998.1	9565956	31.6805	39.4078	4.7019	43.8881	41.6479	0.98644	1.92247	1.87613	-0.135291	0.325151	9803
(8928063,8937901)(9570957,9580957)(9570957,9580957)	NC_044998.1	9575957	43.6572	55.4131	11.7798	57.2486	56.3309	1.09483	1.77568	1.63197	-0.040313	0.301282	9838
(8937902,8947462)(9580958,9590958)(9580958,9590958)	NC_044998.1	9585958	31.0069	42.3604	5.01753	43.1162	42.7383	1.48021	2.11144	1.84453	-0.023317	0.390875	9560
(8947463,8957147)(9590959,9600959)(9590959,9600959)	NC_044998.1	9595959	49.0501	63.9328	17.2222	67.4029	65.6678	1.23555	1.69808	1.45648	-0.06788	0.352044	9684
(8957148,8967086)(9600960,9610960)(9600960,9610960)	NC_044998.1	9605960	39.7244	49.8361	10.0181	50.5424	50.1892	1.03348	1.77504	1.66503	-0.017039	0.273099	9938
(8967087,8976970)(9610961,9620961)(9610961,9620961)	NC_044998.1	9615961	31.0707	38.9815	12.4479	39.9258	39.4536	1.0293	1.49732	1.31913	-0.02907	0.278745	9883
(8976971,8986882)(9620962,9630962)(9620962,9630962)	NC_044998.1	9625962	45.2782	59.0755	16.2504	62.7221	60.8988	1.23957	1.68238	1.43486	-0.077239	0.358188	9911
(8986883,8995880)(9630963,9640963)(9630963,9640963)	NC_044998.1	9635963	26.7829	34.3698	11.0103	30.7564	32.5631	1.1416	1.5183	1.28533	0.128866	0.222414	8997
(8995881,9005725)(9640964,9650964)(9640964,9650964)	NC_044998.1	9645964	39.4521	52.0073	11.3197	55.7174	53.8623	1.29195	1.82588	1.58724	-0.090113	0.378627	9844
(9005726,9015654)(9650965,9660965)(9650965,9660965)	NC_044998.1	9655965	38.158	42.6212	14.0877	56.7846	49.7029	0.474592	1.32226	1.4021	-0.355588	0.313495	9928
(9015655,9025088)(9660966,9670966)(9660966,9670966)	NC_044998.1	9665966	27.2974	33.8456	3.58477	42.5693	38.2074	0.967164	1.93169	1.89809	-0.305314	0.412035	9433
(9025089,9034472)(9670967,9680967)(9670967,9680967)	NC_044998.1	9675967	35.0803	46.3565	4.48513	48.0747	47.2156	1.30242	2.10368	1.93113	-0.046894	0.358037	9383
(9034473,9044373)(9680968,9690968)(9680968,9690968)	NC_044998.1	9685968	37.7471	43.0702	2.36159	43.4298	43.25	0.57209	1.90621	2.08265	-0.009127	0.151033	9900
(9044374,9054278)(9690969,9700972)(9690969,9700969)	NC_044998.1	9695969	35.4028	40.503	7.19086	57.4837	48.9933	0.583813	1.65902	1.76524	-0.459248	0.39737	9904
(9054278,9064207)(9700972,9710970)(9700970,9710970)	NC_044998.1	9705970	32.0615	36.0451	5.86949	37.9268	36.986	0.502617	1.65254	1.80089	-0.056151	0.158764	9929
(9064208,9073150)(9710971,9720971)(9710971,9720971)	NC_044998.1	9715971	31.7331	39.1945	2.40667	39.3203	39.2574	0.950955	2.03457	2.0362	-0.003793	0.245053	8942
(9073151,9082971)(9720972,9730972)(9720972,9730972)	NC_044998.1	9725972	29.9011	36.0103	1.63323	40.7349	38.3726	0.825351	2.01227	2.07639	-0.151082	0.292531	9820
(9082972,9092823)(9730973,9740973)(9730973,9740973)	NC_044998.1	9735973	43.4193	48.4664	5.15387	62.1264	55.2964	0.472578	1.77196	1.96932	-0.301649	0.283877	9851
(9092824,9102681)(9740974,9750974)(9740974,9750974)	NC_044998.1	9745974	34.5993	45.6672	1.42453	39.8745	42.7709	1.29581	2.25245	2.12168	0.160276	0.244394	9857
(9102682,9112372)(9750975,9760975)(9750975,9760975)	NC_044998.1	9755975	38.0343	43.6958	6.81974	38.7318	41.2138	0.603939	1.7142	1.8239	0.12503	0.086613	9690
(9112373,9122268)(9760976,9770976)(9760976,9770976)	NC_044998.1	9765976	38.6642	47.7892	2.86436	55.6291	51.7091	0.957812	2.05559	2.05922	-0.19427	0.349651	9895
(9122269,9132044)(9770977,9780977)(9770977,9780977)	NC_044998.1	9775977	35.7797	41.9022	6.06661	48.9814	45.4418	0.693566	1.76663	1.8405	-0.189458	0.27957	9775
(9132045,9141688)(9780978,9790978)(9780978,9790978)	NC_044998.1	9785978	34.6466	41.73	1.69381	46.2245	43.9772	0.828202	2.03563	2.10474	-0.124188	0.278686	9643
(9141689,9151633)(9790979,9800979)(9790979,9800979)	NC_044998.1	9795979	26.9676	30.4873	5.27114	36.3976	33.4424	0.526064	1.62833	1.75668	-0.209354	0.247467	9944
(9151634,9161535)(9800981,9810980)(9800980,9810980)	NC_044998.1	9805980	27.7187	33.6317	2.91985	35.6811	34.6564	0.860368	1.93217	1.95663	-0.070645	0.258101	9901
(9161536,9171314)(9810981,9820981)(9810981,9820981)	NC_044998.1	9815981	51.9799	59.5582	13.235	60.8697	60.2139	0.594112	1.59174	1.67636	-0.024216	0.164698	9778
(9171315,9181171)(9820982,9830982)(9820982,9830982)	NC_044998.1	9825982	41.0074	45.0502	15.2067	47.7515	46.4008	0.400469	1.29022	1.40272	-0.063137	0.136401	9856
(9181172,9190609)(9830998,9840983)(9830983,9840983)	NC_044998.1	9835983	45.2413	50.7481	10.6993	60.4502	55.5992	0.495133	1.57456	1.70878	-0.205672	0.237703	9437
(9190610,9200352)(9840984,9850984)(9840984,9850984)	NC_044998.1	9845984	50.0994	49.3258	17.1276	79.3324	64.3291	-0.062899	1.14671	1.4783	-0.57474	0.2952	9742
(9200353,9210146)(9850985,9860985)(9850985,9860985)	NC_044998.1	9855985	39.2951	42.631	11.678	59.964	51.2975	0.344619	1.39438	1.56412	-0.422657	0.316605	9793
(9210147,9219833)(9860986,9870986)(9860986,9870986)	NC_044998.1	9865986	57.786	68.244	26.1878	88.0595	78.1517	0.738368	1.30359	1.23386	-0.32929	0.366774	9686
(9219834,9229712)(9870987,9880987)(9870987,9880987)	NC_044998.1	9875987	44.151	47.446	19.224	63.8942	55.6701	0.303482	1.13608	1.26241	-0.357237	0.270809	9878
(9229713,9239490)(9880988,9890988)(9880988,9890988)	NC_044998.1	9885988	38.7112	39.4012	18.8699	49.8069	44.6041	0.072337	0.938336	1.13995	-0.257539	0.157758	9777
(9239491,9248016)(9890989,9900989)(9890989,9900989)	NC_044998.1	9895989	45.6529	45.5303	27.6379	65.9878	55.7591	-0.010921	0.697316	0.883455	-0.429781	0.229858	8525
(9248017,9257555)(9900990,9910990)(9900990,9910990)	NC_044998.1	9905990	39.5003	42.7384	19.3609	55.2207	48.9795	0.332806	1.04784	1.13494	-0.302805	0.248765	9538
(9257556,9267477)(9910991,9920991)(9910991,9920991)	NC_044998.1	9915991	35.2304	34.2285	12.8853	43.4809	38.8547	-0.115237	1.06793	1.40467	-0.251451	0.106481	9921
(9267478,9275835)(9920992,9930992)(9920992,9930992)	NC_044998.1	9925992	37.0066	43.9509	13.9301	40.7838	42.3673	0.761008	1.43279	1.38415	0.08197	0.150036	8357
(9275836,9285755)(9930993,9940993)(9930993,9940993)	NC_044998.1	9935993	38.0607	40.8806	16.8271	43.2584	42.0695	0.300605	1.11739	1.23988	-0.05985	0.109131	9919
(9285756,9295379)(9940994,9950994)(9940994,9950994)	NC_044998.1	9945994	37.572	37.9634	15.2035	59.5465	48.755	0.042264	1.07053	1.32238	-0.550261	0.308343	9623
(9295380,9305307)(9950995,9960995)(9950995,9960995)	NC_044998.1	9955995	38.0293	39.9037	17.6309	40.3201	40.1119	0.199983	1.0355	1.19205	-0.010488	0.056741	9927
(9305308,9315161)(9960996,9970996)(9960996,9970996)	NC_044998.1	9965996	34.1392	36.1653	22.4836	50.821	43.4932	0.240345	0.705549	0.754989	-0.410927	0.283474	9853
(9315162,9325091)(9970997,9980997)(9970997,9980997)	NC_044998.1	9975997	49.6078	53.0421	25.0099	55.471	54.2565	0.281953	1.00794	1.11341	-0.04698	0.097387	9929
(9325092,9333893)(9980998,9990998)(9980998,9990998)	NC_044998.1	9985998	42.0347	44.2845	12.6873	67.843	56.0638	0.217495	1.3338	1.55812	-0.53726	0.346227	8801
(9333894,9343769)(9990999,10000999)(9990999,10000999)	NC_044998.1	9995999	45.7364	46.285	21.9569	73.3564	59.8207	0.048802	0.946458	1.1641	-0.567697	0.31976	9875
(9343770,9353688)(10001000,10011000)(10001000,10011000)	NC_044998.1	10006000	40.9887	44.6536	24.3601	42.4814	43.5675	0.363197	0.877732	0.904453	0.050793	0.065247	9918
(9353689,9363413)(10011001,10021001)(10011001,10021001)	NC_044998.1	10016001	42.1755	46.0594	25.0845	53.0326	49.546	0.374224	0.882546	0.904489	-0.1585	0.181298	9724
(9363414,9373094)(10021002,10031002)(10021002,10031002)	NC_044998.1	10026002	33.5136	39.406	18.8094	42.5331	40.9695	0.711806	1.08113	0.969365	-0.089303	0.23011	9680
(9373095,9382518)(10031003,10041003)(10031003,10041003)	NC_044998.1	10036003	39.842	49.4263	22.8058	44.1542	46.7902	0.97674	1.18334	0.952176	0.126806	0.180799	9423
(9382519,9392382)(10041004,10051004)(10041004,10051004)	NC_044998.1	10046004	47.6518	58.0269	25.1626	58.5709	58.2989	0.886285	1.22872	1.05825	-0.010951	0.232107	9863
(9392383,9402171)(10051005,10061005)(10051005,10061005)	NC_044998.1	10056005	40.0198	41.8545	24.2142	39.8973	40.8759	0.186156	0.780789	0.879634	0.046867	0.022179	9788
(9402172,9411973)(10061006,10071006)(10061006,10071006)	NC_044998.1	10066006	54.975	57.7641	37.8339	60.4208	59.0924	0.206876	0.648514	0.702488	-0.046393	0.07791	9801
(9411974,9421872)(10071007,10081007)(10071007,10081007)	NC_044998.1	10076007	47.0021	42.868	38.4479	61.9976	52.4328	-0.357977	0.167471	0.407894	-0.390414	0.120007	9898
(9421873,9431806)(10081008,10091008)(10081008,10091008)	NC_044998.1	10086008	30.5981	34.5673	16.655	42.9902	38.7787	0.524266	1.02571	1.00209	-0.26326	0.276154	9933
(9431807,9441585)(10091009,10101009)(10091009,10101009)	NC_044998.1	10096009	33.7562	31.2499	19.6153	44.5926	37.9213	-0.300622	0.606509	0.925857	-0.378323	0.127637	9778
(9441586,9451443)(10101010,10111010)(10101010,10111010)	NC_044998.1	10106010	44.5527	53.719	29.391	58.6619	56.1905	0.836737	0.970787	0.761199	-0.10639	0.271157	9857
(9451444,9461367)(10111011,10121011)(10111011,10121011)	NC_044998.1	10116011	51.5878	58.0515	32.6609	66.9209	62.4862	0.510528	0.878907	0.824922	-0.165006	0.219629	9923
(9461368,9471315)(10121012,10131012)(10121012,10131012)	NC_044998.1	10126012	42.0145	49.4427	27.6356	52.4147	50.9287	0.718436	0.920957	0.763757	-0.067811	0.2201	9947
(9471316,9481072)(10131013,10141013)(10131013,10141013)	NC_044998.1	10136013	40.0831	44.5399	27.0441	61.8867	53.2133	0.451507	0.773216	0.724565	-0.414736	0.33963	9756
(9481073,9490705)(10141014,10151014)(10141014,10151014)	NC_044998.1	10146014	56.6097	53.3598	39.0116	80.4611	66.9105	-0.234174	0.453745	0.701022	-0.459678	0.189332	9632
(9490706,9500598)(10151015,10161015)(10151015,10161015)	NC_044998.1	10156015	43.0287	47.3319	31.4838	54.4127	50.8723	0.406526	0.654052	0.59934	-0.157774	0.189154	9892
(9500599,9510434)(10161016,10171016)(10161016,10171016)	NC_044998.1	10166016	35.3282	32.7157	30.1135	53.3836	43.0496	-0.299674	0.129858	0.326949	-0.560144	0.226233	9835
(9510435,9520185)(10171017,10181017)(10171017,10181017)	NC_044998.1	10176017	41.8197	45.9961	26.831	64.1118	55.0539	0.405782	0.813023	0.79971	-0.415247	0.328271	9750
(9520186,9530117)(10181018,10191018)(10181018,10191018)	NC_044998.1	10186018	40.816	41.3407	28.9068	64.8744	53.1076	0.052214	0.539986	0.650388	-0.552616	0.312295	9931
(9530118,9540008)(10191019,10201019)(10191019,10201019)	NC_044998.1	10196019	40.6683	46.8669	30.4401	48.0346	47.4507	0.619058	0.715892	0.560531	-0.027518	0.172942	9890
(9540009,9549935)(10201020,10211020)(10201020,10211020)	NC_044998.1	10206020	35.9055	35.472	23.8516	42.782	39.127	-0.048941	0.570938	0.744152	-0.194955	0.092891	9926
(9549936,9559748)(10211021,10221021)(10211021,10221021)	NC_044998.1	10216021	36.4274	44.0872	24.7861	45.5057	44.7965	0.852547	0.935251	0.70885	-0.037293	0.237909	9812
(9559749,9569568)(10221022,10231022)(10221022,10231022)	NC_044998.1	10226022	47.7992	59.4894	29.7192	65.5453	62.5174	0.995591	1.10971	0.848243	-0.121543	0.319878	9819
(9569569,9579470)(10231023,10241023)(10231023,10241023)	NC_044998.1	10236023	40.849	44.8562	41.1398	55.4392	50.1477	0.398455	0.161272	-0.015868	-0.24831	0.236066	9901
(9579471,9589263)(10241024,10251024)(10241024,10251024)	NC_044998.1	10246024	46.8285	52.7856	40.3596	60.4245	56.6051	0.517711	0.472494	0.309559	-0.156477	0.216838	9792
(9589264,9599169)(10251025,10261025)(10251025,10261025)	NC_044998.1	10256025	27.0468	33.1756	9.83813	49.2058	41.1907	0.913406	1.50283	1.38948	-0.566179	0.539025	9905
(9599170,9608978)(10261026,10271026)(10261026,10271026)	NC_044998.1	10266026	29.6189	36.1158	14.9117	50.6551	43.3855	0.88591	1.25246	1.09003	-0.469324	0.479829	9808
(9608979,9618585)(10271027,10281027)(10271027,10281027)	NC_044998.1	10276027	47.0551	54.7386	21.6318	55.9025	55.3206	0.664567	1.25299	1.21094	-0.023728	0.182448	9606
(9618586,9628427)(10281028,10291028)(10281028,10291028)	NC_044998.1	10286028	33.8867	38.8042	15.347	47.3013	43.0528	0.587627	1.2183	1.20942	-0.240009	0.279823	9841
(9628428,9638308)(10291029,10301029)(10291029,10301029)	NC_044998.1	10296029	33.3298	37.8267	18.007	49.1679	43.4973	0.546166	1.04585	1.01544	-0.325653	0.315501	9880
(9638309,9648231)(10301030,10311030)(10301030,10311030)	NC_044998.1	10306030	36.5593	42.1494	12.0426	63.9597	53.0545	0.61999	1.4538	1.48771	-0.571343	0.467247	9922
(9648232,9657953)(10311031,10321031)(10311031,10321031)	NC_044998.1	10316031	33.3572	35.1759	28.5215	63.9236	49.5498	0.22071	0.350864	0.320213	-0.824793	0.502057	9721
(9657954,9667861)(10321032,10331032)(10321032,10331032)	NC_044998.1	10326032	31.7453	41.7183	14.2881	41.7417	41.73	1.27058	1.51648	1.21165	-0.000705	0.325059	9907
(9667862,9677345)(10331033,10341033)(10331033,10341033)	NC_044998.1	10336033	43.1153	51.3799	24.4104	71.4209	61.4004	0.779216	1.11087	0.969169	-0.445658	0.440081	9483
(9677346,9687192)(10341034,10351034)(10341034,10351034)	NC_044998.1	10346034	51.2912	60.1021	33.0096	89.1954	74.6488	0.699905	0.943088	0.801246	-0.544367	0.473412	9846
(9687193,9696894)(10351035,10361035)(10351035,10361035)	NC_044998.1	10356035	30.9236	38.7185	12.841	47.3064	43.0124	1.01895	1.46693	1.28664	-0.265618	0.403855	9701
(9696895,9706525)(10361036,10371036)(10361036,10371036)	NC_044998.1	10366036	35.2506	38.1804	35.7247	40.1095	39.1449	0.336785	0.122804	-0.029787	-0.052395	0.114348	9630
(9706526,9715743)(10371037,10381037)(10371037,10381037)	NC_044998.1	10376037	39.7588	49.0109	28.4433	55.3219	52.1664	0.944824	0.91612	0.633708	-0.152109	0.323523	9217
(9715744,9725350)(10381038,10391038)(10381038,10391038)	NC_044998.1	10386038	33.8938	41.9447	22.3328	53.3683	47.6565	0.961855	1.01838	0.754017	-0.322603	0.420061	9606
(9725351,9735154)(10391039,10401043)(10391039,10401039)	NC_044998.1	10396039	46.3695	49.4212	40.3014	72.7819	61.1015	0.267802	0.3501	0.293146	-0.483233	0.329947	9803
(9735154,9745029)(10401043,10411040)(10401040,10411040)	NC_044998.1	10406040	35.2437	38.3258	32.6032	55.2889	46.8073	0.354367	0.286235	0.165931	-0.460828	0.339611	9875
(9745030,9754403)(10411041,10421041)(10411041,10421041)	NC_044998.1	10416041	31.5546	35.1374	29.3211	37.1452	36.1413	0.459164	0.323415	0.155909	-0.060868	0.150213	9373
(9754404,9764166)(10421042,10431042)(10421042,10431042)	NC_044998.1	10426042	35.8862	38.6459	28.8981	61.4188	50.0324	0.311715	0.47918	0.431631	-0.607668	0.40812	9762
(9764167,9773777)(10431043,10441043)(10431043,10441043)	NC_044998.1	10436043	64.4001	72.3482	48.4647	96.6593	84.5037	0.504085	0.666009	0.560059	-0.362677	0.325155	9610
(9773778,9783470)(10441044,10451044)(10441044,10451044)	NC_044998.1	10446044	37.3268	43.7901	10.4785	67.5379	55.664	0.702318	1.57673	1.59719	-0.609399	0.508877	9692
(9783471,9793267)(10451045,10461045)(10451045,10461045)	NC_044998.1	10456045	48.0816	51.3072	23.7003	61.3421	56.3246	0.273109	1.0232	1.13739	-0.200228	0.178108	9796
(9793268,9803039)(10461046,10471046)(10461046,10471046)	NC_044998.1	10466046	35.2511	41.4697	18.7672	45.0007	43.2352	0.714844	1.13531	1.03564	-0.095903	0.234436	9771
(9803040,9812965)(10471047,10481047)(10471047,10481047)	NC_044998.1	10476047	37.9092	47.6438	10.9127	58.4958	53.0698	1.04182	1.71289	1.58241	-0.274227	0.414346	9925
(9812966,9822542)(10481048,10491048)(10481048,10491048)	NC_044998.1	10486048	31.7503	39.716	9.12796	43.2459	41.4809	1.0147	1.69082	1.56991	-0.106357	0.316741	9576
(9822543,9832479)(10491049,10501049)(10491049,10501049)	NC_044998.1	10496049	32.7761	43.136	2.80552	39.9021	41.519	1.27913	2.16257	2.01802	0.094416	0.275813	9936
(9832480,9842345)(10501050,10511050)(10501050,10511050)	NC_044998.1	10506050	30.8365	40.804	3.25068	36.8939	38.849	1.30657	2.13455	1.96808	0.121276	0.26842	9865
(9842346,9852038)(10511051,10521051)(10511051,10521051)	NC_044998.1	10516051	37.5473	51.548	4.97022	72.2602	61.9041	1.51259	2.19221	1.92711	-0.528403	0.672015	9692
(9852039,9861842)(10521052,10531052)(10521052,10531052)	NC_044998.1	10526052	36.7977	49.6998	3.27271	56.1981	52.949	1.42182	2.22791	2.02176	-0.169134	0.454576	9803
(9861843,9871776)(10531053,10541053)(10531053,10541053)	NC_044998.1	10536053	36.7456	47.0515	2.85996	58.0216	52.5366	1.13729	2.12352	2.04627	-0.285928	0.445056	9933
(9871777,9881700)(10541054,10551054)(10541054,10551054)	NC_044998.1	10546054	33.655	46.8324	1.02272	48.7567	47.7945	1.5853	2.39492	2.14267	-0.054723	0.434582	9923
(9881701,9891583)(10551055,10561055)(10551055,10561055)	NC_044998.1	10556055	35.7642	44.0218	3.15891	57.4185	50.7202	0.935844	2.01531	2.02048	-0.358685	0.432935	9882
(9891584,9897664)(10561056,10571294)(10561056,10571056)	NC_044998.1	10566056	22.6806	29.3321	3.31724	34.8476	32.0899	1.17708	1.97834	1.84344	-0.231868	0.426155	6080
(9897664,9907158)(10571294,10581057)(10571057,10581057)	NC_044998.1	10576057	37.5098	46.7725	1.69989	52.4504	49.6114	1.00169	2.12341	2.12037	-0.144998	0.334219	9494
(9907159,9916982)(10581058,10591058)(10581058,10591058)	NC_044998.1	10586058	36.35	48.6434	1.0484	53.6304	51.1369	1.37115	2.31098	2.15392	-0.131388	0.421236	9823
(9916983,9926749)(10591059,10601059)(10591059,10601059)	NC_044998.1	10596059	36.1436	44.9765	14.7014	50.7484	47.8625	0.99071	1.47808	1.31542	-0.152929	0.335717	9766
(9926750,9936310)(10601060,10611060)(10601060,10611060)	NC_044998.1	10606060	43.3242	46.8382	26.9492	69.0187	57.9285	0.329742	0.81541	0.844516	-0.490871	0.349816	9560
(9936311,9945899)(10611061,10621061)(10611061,10621061)	NC_044998.1	10616061	44.4093	53.3671	25.689	70.2673	61.8172	0.820307	1.10792	0.942779	-0.36493	0.406895	9588
(9945900,9953051)(10621062,10631284)(10621062,10631062)	NC_044998.1	10626062	30.9013	31.1491	28.4328	43.9058	37.5274	0.032418	0.154088	0.175762	-0.394835	0.221518	7151
(9953051,9962648)(10631284,10641063)(10631063,10641063)	NC_044998.1	10636063	34.6081	36.894	21.7169	53.0125	44.9532	0.26756	0.772499	0.824254	-0.445864	0.309325	9597
(9962649,9972461)(10641064,10651064)(10641064,10651064)	NC_044998.1	10646064	51.3991	64.0759	28.4245	71.0809	67.5784	1.0049	1.23849	1.00489	-0.130797	0.32724	9812
(9972462,9982213)(10651065,10661065)(10651065,10661065)	NC_044998.1	10656065	46.3526	54.0604	27.6366	83.6936	68.877	0.67664	1.01475	0.904484	-0.613207	0.504651	9751
(9982214,9992061)(10661066,10671066)(10661066,10671066)	NC_044998.1	10666066	37.9178	39.0639	31.2224	59.8476	49.4557	0.122628	0.365591	0.392367	-0.525082	0.315266	9847
(9992062,10001926)(10671067,10681067)(10671067,10681067)	NC_044998.1	10676067	49.4304	57.1877	26.2288	81.6874	69.4376	0.639118	1.11705	1.05384	-0.475579	0.420619	9864
(10001927,10011752)(10681068,10691068)(10681068,10691068)	NC_044998.1	10686068	42.7698	51.3197	23.9673	59.7125	55.5161	0.812541	1.13544	0.981784	-0.18813	0.309225	9825
(10011753,10021543)(10691069,10701069)(10691069,10701069)	NC_044998.1	10696069	44.5206	49.6048	30.9757	49.4842	49.5445	0.464428	0.743892	0.680498	0.002596	0.117138	9790
(10021544,10031371)(10701070,10711070)(10701070,10711070)	NC_044998.1	10706070	53.1507	64.5405	23.4167	75.4698	70.0052	0.873474	1.38281	1.25906	-0.197382	0.329766	9827
(10031372,10041185)(10711071,10721071)(10711071,10721071)	NC_044998.1	10716071	31.667	37.4285	12.9928	36.7411	37.0848	0.7358	1.35412	1.29915	0.020765	0.176809	9813
(10041186,10051057)(10721072,10731072)(10721072,10731072)	NC_044998.1	10726072	42.4504	47.0995	24.9155	51.0149	49.0572	0.445098	0.927583	0.922212	-0.088423	0.161472	9871
(10051058,10060820)(10731073,10741073)(10731073,10741073)	NC_044998.1	10736073	38.94	46.7273	16.0527	49.4288	48.0781	0.811698	1.39398	1.30756	-0.066472	0.243219	9762
(10060821,10070443)(10741074,10751074)(10741074,10751074)	NC_044998.1	10746074	39.5834	47.3506	10.7252	58.1861	52.7683	0.796641	1.63833	1.62302	-0.262308	0.345295	9622
(10070444,10079327)(10751075,10761075)(10751075,10761075)	NC_044998.1	10756075	40.8216	42.3364	25.164	57.7686	50.0525	0.150721	0.745673	0.854984	-0.362328	0.2345	8883
(10079328,10089159)(10761076,10771076)(10761076,10771076)	NC_044998.1	10766076	52.8156	63.5852	32.5997	77.4457	70.5154	0.831087	1.04833	0.86128	-0.251897	0.348482	9831
(10089160,10098017)(10771077,10781077)(10771077,10781077)	NC_044998.1	10776077	47.5041	53.4859	43.4385	74.5219	64.0039	0.512559	0.376779	0.191883	-0.424809	0.360803	8857
(10098018,10107313)(10781078,10791078)(10781078,10791078)	NC_044998.1	10786078	49.4356	48.4447	59.2215	71.2848	59.8648	-0.081633	-0.388808	-0.444442	-0.44332	0.219234	9295
(10107314,10117052)(10791079,10801079)(10791079,10801079)	NC_044998.1	10796079	44.2125	48.1121	42.775	51.4846	49.7983	0.358664	0.214557	0.072708	-0.073146	0.131138	9738
(10117053,10126889)(10801080,10811080)(10801080,10811080)	NC_044998.1	10806080	41.9161	45.49	33.2409	60.9037	53.1968	0.346459	0.518476	0.461833	-0.352504	0.27918	9836
(10126890,10136566)(10811081,10821081)(10811081,10821081)	NC_044998.1	10816081	39.1359	41.3086	31.7186	55.7044	48.5065	0.225347	0.433706	0.421726	-0.352455	0.248174	9676
(10136567,10146266)(10821082,10831082)(10821082,10831082)	NC_044998.1	10826082	54.0828	65.6148	30.2884	90.6179	78.1163	0.869309	1.16795	0.990737	-0.443806	0.462197	9699
(10146267,10156112)(10831083,10841083)(10831083,10841083)	NC_044998.1	10836083	44.0852	45.3266	33.4045	69.7371	57.5319	0.11451	0.480619	0.541693	-0.530954	0.316591	9845
(10156113,10165986)(10841084,10851084)(10841084,10851084)	NC_044998.1	10846084	48.4397	54.9641	27.2952	89.3891	72.1766	0.548388	1.01815	0.979364	-0.681838	0.509133	9873
(10165987,10175422)(10851085,10861085)(10851085,10861085)	NC_044998.1	10856085	36.5647	39.7349	32.7168	54.3541	47.0445	0.351548	0.338842	0.233463	-0.382912	0.29681	9435
(10175423,10185152)(10861086,10871086)(10861086,10871086)	NC_044998.1	10866086	46.2794	58.1991	22.3753	64.1938	61.1964	1.04802	1.37784	1.15697	-0.124246	0.334733	9729
(10185153,10194600)(10871087,10881087)(10871087,10881087)	NC_044998.1	10876087	47.517	46.8678	43.9402	75.9483	61.4081	-0.05561	0.109758	0.168771	-0.587105	0.303677	9447
(10194601,10204192)(10881088,10891088)(10881088,10891088)	NC_044998.1	10886088	42.1879	51.3639	28.3278	60.9101	56.137	0.883885	0.969002	0.733299	-0.21692	0.343018	9591
(10204193,10213059)(10891089,10901089)(10891089,10901089)	NC_044998.1	10896089	42.0179	44.9455	30.2425	65.025	54.9852	0.28313	0.620893	0.625424	-0.458103	0.320152	8866
(10213060,10222943)(10901090,10911090)(10901090,10911090)	NC_044998.1	10906090	41.3526	45.3529	27.7282	55.436	50.3945	0.393	0.755828	0.734796	-0.233715	0.226782	9883
(10222944,10232758)(10911091,10921091)(10911091,10921091)	NC_044998.1	10916091	43.2956	43.2495	42.4216	56.2577	49.7536	-0.004329	0.033964	0.045104	-0.288071	0.15479	9814
(10232759,10242473)(10921092,10931092)(10921092,10931092)	NC_044998.1	10926092	39.2795	44.4836	28.1231	68.3405	56.412	0.537825	0.737293	0.632094	-0.581969	0.452107	9714
(10242474,10250975)(10931093,10941333)(10931093,10941093)	NC_044998.1	10936093	30.2268	30.4565	25.3878	44.0916	37.2741	0.030705	0.293649	0.351821	-0.431358	0.240768	8501
(10250975,10260573)(10941333,10951094)(10941094,10951094)	NC_044998.1	10946094	39.1044	41.5846	32.5243	56.3571	48.9708	0.257447	0.41007	0.374414	-0.361965	0.261514	9598
(10260574,10270390)(10951095,10961095)(10951095,10961095)	NC_044998.1	10956095	38.3967	43.4857	29.6946	53.2189	48.3523	0.537828	0.635262	0.503885	-0.242856	0.26868	9816
(10270391,10279861)(10961096,10971096)(10961096,10971096)	NC_044998.1	10966096	42.4594	51.4031	30.1525	66.9189	59.161	0.856083	0.888375	0.647126	-0.350326	0.408108	9470
(10279862,10289442)(10971097,10981097)(10971097,10981097)	NC_044998.1	10976097	43.7273	52.6533	23.1903	66.8296	59.7415	0.82997	1.19715	1.04977	-0.310858	0.380092	9580
(10289443,10299317)(10981098,10991098)(10981098,10991098)	NC_044998.1	10986098	35.317	42.3356	24.4352	61.3039	51.8197	0.805318	0.893559	0.682464	-0.51424	0.483673	9874
(10299318,10308973)(10991099,11001099)(10991099,11001099)	NC_044998.1	10996099	36.9846	34.9869	46.9498	39.2294	37.1082	-0.219049	-0.571276	-0.598062	-0.109869	0.003461	9655
(10308974,10318388)(11001100,11011100)(11001100,11011100)	NC_044998.1	11006100	36.2625	42.2391	21.6043	52.7402	47.4897	0.668185	1.00425	0.896426	-0.277321	0.320589	9414
(10318389,10328279)(11011101,11021101)(11011101,11021101)	NC_044998.1	11016101	48.0432	62.0386	21.0549	67.6645	64.8516	1.18594	1.52018	1.25998	-0.112344	0.363469	9890
(10328280,10337811)(11021102,11031102)(11021102,11031102)	NC_044998.1	11026102	47.7898	58.436	19.8634	76.7518	67.5939	0.906846	1.4381	1.31045	-0.367678	0.430496	9531
(10337812,10347335)(11031103,11041103)(11031103,11041103)	NC_044998.1	11036103	31.9186	35.5386	10.5349	47.1726	41.3556	0.458738	1.37516	1.47653	-0.348711	0.305588	9523
(10347336,10356902)(11041104,11051104)(11041104,11051104)	NC_044998.1	11046104	38.8006	47.5673	15.6614	51.8612	49.7142	0.91701	1.45494	1.32649	-0.10603	0.291507	9566
(10356903,10366420)(11051105,11061105)(11051105,11061105)	NC_044998.1	11056105	42.8043	47.5288	30.5145	65.556	56.5424	0.448632	0.705735	0.641219	-0.403772	0.33302	9517
(10366421,10376188)(11061106,11071106)(11061106,11071106)	NC_044998.1	11066106	49.7161	58.86	21.9852	78.346	68.603	0.749081	1.32309	1.25258	-0.376092	0.394808	9767
(10376189,10385741)(11071107,11081107)(11071107,11081107)	NC_044998.1	11076107	29.9195	28.3741	29.7177	33.5515	30.9628	-0.208658	-0.078602	0.014815	-0.16546	0.036004	9552
(10385742,10394953)(11081108,11091108)(11081108,11091108)	NC_044998.1	11086108	39.7129	49.3235	21.0561	65.1114	57.2174	0.982546	1.26048	1.046	-0.380959	0.456944	9211
(10394954,10404288)(11091109,11101109)(11091109,11101109)	NC_044998.1	11096109	64.0463	77.9176	22.5573	89.941	83.9293	0.88457	1.5521	1.46599	-0.180354	0.323351	9334
(10404289,10413628)(11101110,11111110)(11101110,11111110)	NC_044998.1	11106110	49.4929	60.2826	18.0238	71.4552	65.8689	0.887844	1.5229	1.42762	-0.216607	0.34385	9339
(10413629,10422826)(11111111,11121111)(11111111,11121111)	NC_044998.1	11116111	37.4732	44.0192	12.1974	51.2575	47.6384	0.708582	1.50056	1.49802	-0.185022	0.281007	9197
(10422827,10432595)(11121112,11131112)(11121112,11131112)	NC_044998.1	11126112	47.8885	61.1541	17.4421	64.0116	62.5829	1.12768	1.62646	1.42586	-0.057244	0.31877	9768
(10432596,10442334)(11131113,11141113)(11131113,11141113)	NC_044998.1	11136113	56.1529	64.3975	31.7051	66.053	65.2252	0.598845	1.04205	0.98156	-0.028306	0.168098	9738
(10442335,10452093)(11141114,11151114)(11141114,11151114)	NC_044998.1	11146114	43.78	50.286	19.1324	64.805	57.5455	0.604235	1.26438	1.25844	-0.317991	0.326332	9758
(10452094,10461968)(11151115,11161115)(11151115,11161115)	NC_044998.1	11156115	53.8435	64.2106	33.4744	68.6751	66.4428	0.78493	1.02058	0.851766	-0.079596	0.243369	9874
(10461969,10471515)(11161116,11171123)(11161116,11171116)	NC_044998.1	11166116	48.0145	49.7536	30.2247	58.3524	54.053	0.147459	0.724793	0.83102	-0.171811	0.130656	9546
(10471515,10481022)(11171123,11181117)(11171117,11181117)	NC_044998.1	11176117	46.9801	53.998	24.7161	65.222	59.61	0.607957	1.10995	1.06209	-0.229176	0.279228	9507
(10481023,10490676)(11181118,11191118)(11181118,11191118)	NC_044998.1	11186118	63.1757	74.8677	28.7817	86.7136	80.7907	0.755767	1.30947	1.23158	-0.180128	0.290382	9653
(10490677,10500601)(11191119,11201119)(11191119,11201119)	NC_044998.1	11196119	51.634	63.3922	17.2673	62.5802	62.9862	0.927899	1.59525	1.49656	0.015093	0.228574	9924
(10500602,10510177)(11201120,11211138)(11201120,11211120)	NC_044998.1	11206120	40.5177	48.1338	13.3247	77.9644	63.0491	0.763408	1.52245	1.49555	-0.705599	0.576624	9575
(10510177,10519921)(11211138,11221121)(11211121,11221121)	NC_044998.1	11216121	44.0417	52.8159	25.8983	62.1215	57.4687	0.810103	1.08617	0.921055	-0.202605	0.316435	9744
(10519922,10529671)(11221122,11231122)(11221122,11231122)	NC_044998.1	11226122	49.9768	59.8294	27.9829	54.6724	57.2509	0.80298	1.13688	0.98844	0.099017	0.151271	9749
(10529672,10538804)(11231123,11241123)(11231123,11241123)	NC_044998.1	11236123	50.8417	62.273	21.8873	66.2397	64.2564	0.915986	1.4179	1.27986	-0.074874	0.274269	9132
(10538805,10548281)(11241124,11251124)(11241124,11251124)	NC_044998.1	11246124	57.3523	70.6209	11.9711	82.2932	76.457	0.943822	1.83133	1.78506	-0.195428	0.346646	9476
(10548282,10558151)(11251125,11261125)(11251125,11261125)	NC_044998.1	11256125	33.1327	38.409	17.4461	44.5741	41.4916	0.644582	1.11248	1.04543	-0.17807	0.260901	9869
(10558152,10567736)(11261126,11271126)(11261126,11271126)	NC_044998.1	11266126	61.0258	75.7917	22.9681	89.2719	82.5318	0.987746	1.55251	1.40942	-0.212171	0.366915	9584
(10567737,10577317)(11271127,11281127)(11271127,11281127)	NC_044998.1	11276127	43.127	50.6171	16.8746	64.1844	57.4008	0.706013	1.38949	1.35987	-0.301618	0.343446	9580
(10577318,10586840)(11281128,11291128)(11281128,11291128)	NC_044998.1	11286128	34.9663	45.3446	11.8779	50.8876	48.1161	1.20255	1.68667	1.46184	-0.151771	0.389217	9522
(10586841,10596369)(11291129,11301129)(11291129,11301129)	NC_044998.1	11296129	44.6887	54.0314	17.706	64.5029	59.2671	0.850278	1.44526	1.3507	-0.224708	0.338652	9528
(10596370,10605988)(11301130,11311130)(11301130,11311130)	NC_044998.1	11306130	38.3507	46.7078	9.236	59.4635	53.0857	0.884256	1.72806	1.68778	-0.31865	0.398134	9618
(10605989,10615265)(11311131,11321131)(11311131,11321131)	NC_044998.1	11316131	44.4217	56.7233	9.83612	61.4479	59.0856	1.12621	1.87633	1.7413	-0.10199	0.342663	9276
(10615266,10625010)(11321132,11331132)(11321132,11331132)	NC_044998.1	11326132	25.9867	31.5036	8.70554	23.1191	27.3113	0.854975	1.5248	1.44874	0.308093	0.052502	9744
(10625011,10634911)(11331133,11341133)(11331133,11341133)	NC_044998.1	11336133	41.495	53.5716	10.6796	48.0223	50.797	1.18243	1.83332	1.65647	0.128189	0.232518	9900
(10634912,10644793)(11341134,11351134)(11341134,11351134)	NC_044998.1	11346134	68.6435	86.3737	16.8408	97.3743	91.874	1.05562	1.82169	1.71092	-0.154003	0.35267	9881
(10644794,10654699)(11351135,11361135)(11351135,11361135)	NC_044998.1	11356135	49.599	66.8567	13.3025	49.1208	57.9888	1.41708	1.92596	1.64322	0.343118	0.175789	9905
(10654700,10664529)(11361136,11371136)(11361136,11371136)	NC_044998.1	11366136	32.966	38.3494	14.2144	37.2466	37.798	0.660933	1.28701	1.2557	0.032012	0.151572	9829
(10664530,10674447)(11371137,11381137)(11371137,11381137)	NC_044998.1	11376137	32.066	43.0196	9.90756	39.2677	41.1437	1.38183	1.81311	1.52335	0.111945	0.292621	9917
(10674448,10684134)(11381138,11391138)(11381138,11391138)	NC_044998.1	11386138	40.5628	58.7221	3.90241	53.9091	56.3156	1.81823	2.39508	2.01409	0.11372	0.402704	9686
(10684135,10693967)(11391139,11401139)(11391139,11401139)	NC_044998.1	11396139	43.4108	55.4472	13.5647	50.5216	52.9844	1.12722	1.71378	1.53631	0.10879	0.228865	9832
(10693968,10703812)(11401140,11411140)(11401140,11411140)	NC_044998.1	11406140	40.0024	49.0124	17.4131	51.3332	50.1728	0.91459	1.39923	1.25769	-0.055597	0.263595	9844
(10703813,10713726)(11411141,11421141)(11411141,11421141)	NC_044998.1	11416141	43.5949	52.9138	12.2219	53.6538	53.2838	0.869093	1.65826	1.60835	-0.016275	0.230654	9913
(10713727,10723605)(11421142,11431142)(11421142,11431142)	NC_044998.1	11426142	36.9124	52.8941	1.65783	51.8188	52.3564	1.75581	2.45134	2.11975	0.0279	0.43334	9878
(10723606,10733361)(11431143,11441143)(11431143,11441143)	NC_044998.1	11436143	29.6788	37.3078	3.27509	41.2863	39.2971	1.03823	2.00633	1.95319	-0.128168	0.334576	9755
(10733362,10743036)(11441144,11451144)(11441144,11451144)	NC_044998.1	11446144	35.5547	45.3497	7.90197	53.9323	49.641	1.11651	1.85733	1.72321	-0.231134	0.410131	9674
(10743037,10752512)(11451145,11461145)(11451145,11461145)	NC_044998.1	11456145	36.4118	47.2819	9.55371	50.2161	48.749	1.21037	1.82891	1.63609	-0.077175	0.350862	9475
(10752513,10762329)(11461146,11471146)(11461146,11471146)	NC_044998.1	11466146	27.7108	38.709	1.24247	34.7351	36.722	1.60071	2.35776	2.08891	0.137023	0.335333	9816
(10762330,10771314)(11471147,11481147)(11471147,11481147)	NC_044998.1	11476147	25.7542	33.703	2.82568	36.9375	35.3203	1.24272	2.08281	1.93846	-0.119918	0.382519	8984
(10771315,10781150)(11481148,11491148)(11481148,11491148)	NC_044998.1	11486148	26.42	38.7085	2.09496	41.7849	40.2467	1.8739	2.41076	2.00785	-0.111209	0.539212	9835
(10781151,10790890)(11491149,11501149)(11491149,11501149)	NC_044998.1	11496149	25.9909	36.0072	1.23716	38.4224	37.2148	1.55202	2.32517	2.07489	-0.088733	0.444797	9739
(10790891,10800709)(11501150,11511150)(11501150,11511150)	NC_044998.1	11506150	31.5699	44.277	1.83431	41.9631	43.1201	1.62774	2.35892	2.07472	0.070115	0.378084	9818
(10800710,10810308)(11511151,11521151)(11511151,11521151)	NC_044998.1	11516151	36.4207	49.907	1.41701	54.8362	52.3716	1.50132	2.35005	2.13179	-0.129612	0.453522	9598
(10810309,10820066)(11521152,11531152)(11521152,11531152)	NC_044998.1	11526152	29.7754	38.4188	2.78882	41.7505	40.0846	1.17255	2.09401	1.99019	-0.106985	0.357469	9757
(10820067,10829688)(11531153,11541153)(11531153,11541153)	NC_044998.1	11536153	29.3341	40.0367	1.71632	41.3157	40.6762	1.47329	2.28439	2.06568	-0.041681	0.399101	9621
(10829689,10839549)(11541154,11551154)(11541154,11551154)	NC_044998.1	11546154	27.7849	39.1948	1.51982	35.6157	37.4053	1.65632	2.36488	2.06766	0.123087	0.357065	9860
(10839550,10849096)(11551155,11561155)(11551155,11561155)	NC_044998.1	11556155	40.6414	57.1987	1.79316	67.9732	62.586	1.65468	2.41616	2.13033	-0.254086	0.559921	9546
(10849097,10858946)(11561156,11571156)(11561156,11571156)	NC_044998.1	11566156	27.7674	38.5177	2.81304	36.0204	37.2691	1.56152	2.24254	1.96564	0.085936	0.352876	9849
(10858947,10868133)(11571157,11581157)(11571157,11581157)	NC_044998.1	11576157	31.6625	44.9677	1.63602	46.8128	45.8902	1.69944	2.40158	2.08921	-0.055747	0.464385	9186
(10868134,10877965)(11581158,11591158)(11581158,11591158)	NC_044998.1	11586158	37.6441	52.3949	1.29104	45.9542	49.1746	1.58959	2.39928	2.14519	0.163893	0.317321	9831
(10877966,10887523)(11591159,11601159)(11591159,11601159)	NC_044998.1	11596159	39.1374	49.6127	8.28712	56.9201	53.2664	1.08646	1.86887	1.75398	-0.1789	0.374184	9557
(10887524,10897469)(11601160,11611160)(11601160,11611160)	NC_044998.1	11606160	36.7088	43.5982	15.425	35.0414	39.3198	0.761028	1.3551	1.28651	0.223248	0.073664	9945
(10897470,10907219)(11611161,11621161)(11611161,11621161)	NC_044998.1	11616161	40.8687	48.7368	13.3128	54.8337	51.7852	0.781988	1.5365	1.50303	-0.142984	0.277005	9749
(10907220,10917058)(11621162,11631162)(11621162,11631162)	NC_044998.1	11626162	29.557	34.5677	10.2057	43.419	38.9934	0.684661	1.44185	1.43707	-0.286306	0.329577	9838
(10917059,10926897)(11631163,11641163)(11631163,11641163)	NC_044998.1	11636163	40.1359	49.4132	18.4608	59.3999	54.4065	0.938635	1.36618	1.20295	-0.238452	0.368647	9838
(10926898,10936553)(11641164,11651164)(11641164,11651164)	NC_044998.1	11646164	47.0633	52.3513	22.4495	70.0918	61.2215	0.45729	1.1315	1.17219	-0.361594	0.312468	9655
(10936554,10946315)(11651165,11661165)(11651165,11661165)	NC_044998.1	11656165	31.648	41.179	6.4375	44.8809	43.0299	1.21792	1.92633	1.75488	-0.111898	0.371668	9761
(10946316,10956180)(11661166,11671166)(11661166,11671166)	NC_044998.1	11666166	44.8979	53.9028	15.8172	70.0869	61.9948	0.815765	1.50846	1.4492	-0.345689	0.395326	9864
(10956181,10966118)(11671167,11681167)(11671167,11681167)	NC_044998.1	11676167	32.85	43.4948	2.17865	50.7349	47.1149	1.31141	2.21066	2.06079	-0.210907	0.449019	9937
(10966119,10975911)(11681168,11691168)(11681168,11691168)	NC_044998.1	11686168	29.811	43.8311	1.24727	44.8939	44.3625	1.89971	2.49984	2.10412	-0.034086	0.503971	9792
(10975912,10984950)(11691169,11701169)(11691169,11701169)	NC_044998.1	11696169	29.1997	38.1432	2.65124	48.7996	43.4714	1.23668	2.12505	1.99433	-0.348878	0.504459	9038
(10984951,10994569)(11701170,11711170)(11701170,11711170)	NC_044998.1	11706170	28.4298	39.794	1.95969	36.7149	38.2544	1.61306	2.32364	2.03922	0.103513	0.356516	9618
(10994570,11003959)(11711171,11721171)(11711171,11721171)	NC_044998.1	11716171	48.4271	63.9325	3.99601	67.3904	65.6614	1.3036	2.20608	2.05846	-0.068505	0.369754	9389
(11003960,11013747)(11721172,11731172)(11721172,11731172)	NC_044998.1	11726172	37.3783	43.5157	18.8329	56.6469	50.0813	0.666015	1.16676	1.1018	-0.3365	0.352045	9787
(11013748,11023368)(11731173,11741173)(11731173,11741173)	NC_044998.1	11736173	34.3801	43.6224	10.4437	43.1257	43.3741	1.08885	1.6995	1.54013	0.013831	0.270683	9620
(11023369,11033186)(11741174,11751174)(11741174,11751174)	NC_044998.1	11746174	32.7157	38.7117	16.8855	37.6327	38.1722	0.741666	1.17242	1.06777	0.03156	0.172449	9817
(11033187,11042874)(11751175,11761175)(11751175,11761175)	NC_044998.1	11756175	46.7022	59.905	10.9133	67.4799	63.6924	1.15046	1.86777	1.71709	-0.155582	0.377839	9687
(11042875,11052565)(11761176,11771557)(11761176,11771176)	NC_044998.1	11766176	30.982	37.4018	14.3674	43.1217	40.2617	0.837648	1.30342	1.18008	-0.176582	0.309436	9690
(11052565,11061984)(11771557,11781177)(11771177,11781177)	NC_044998.1	11776177	36.8753	47.0825	10.0143	42.3555	44.719	1.1225	1.7752	1.61663	0.122775	0.2203	9419
(11061985,11071623)(11781178,11791178)(11781178,11791178)	NC_044998.1	11786178	33.7565	40.9321	13.5112	47.0497	43.9909	0.860708	1.42943	1.32553	-0.173458	0.313624	9638
(11071624,11081261)(11791179,11801179)(11791179,11801179)	NC_044998.1	11796179	35.8498	47.8344	8.76988	50.7388	49.2866	1.35502	1.9222	1.67426	-0.077579	0.38804	9637
(11081262,11091163)(11801180,11811180)(11801180,11811180)	NC_044998.1	11806180	43.1405	54.1477	9.80151	70.0576	62.1027	1.0372	1.82558	1.72644	-0.353587	0.456112	9901
(11091164,11100818)(11811181,11821181)(11811181,11821181)	NC_044998.1	11816181	34.5702	42.8257	17.1969	38.1917	40.5087	0.967333	1.30585	1.11199	0.128323	0.177755	9654
(11100819,11110576)(11821182,11831182)(11821182,11831182)	NC_044998.1	11826182	43.5067	59.7239	8.32714	50.649	55.1865	1.51547	2.09862	1.80701	0.199998	0.278606	9757
(11110577,11120430)(11831183,11841183)(11831183,11841183)	NC_044998.1	11836183	35.6159	44.4649	9.43449	39.8509	42.1579	1.00696	1.73456	1.62885	0.124047	0.190149	9853
(11120431,11130119)(11841184,11851184)(11841184,11851184)	NC_044998.1	11846184	35.4522	44.3987	13.877	48.2343	46.3165	1.02268	1.51801	1.34818	-0.103592	0.317221	9688
(11130120,11140001)(11851185,11861185)(11851185,11861185)	NC_044998.1	11856185	35.4283	47.6466	13.2699	57.6333	52.64	1.39761	1.71085	1.38552	-0.269901	0.502889	9881
(11140002,11149835)(11861186,11871186)(11861186,11871186)	NC_044998.1	11866186	35.0268	42.5042	15.4472	55.5681	49.0361	0.864949	1.36137	1.23764	-0.357083	0.413951	9833
(11149836,11159703)(11871187,11881187)(11871187,11881187)	NC_044998.1	11876187	36.6809	49.0105	7.42547	51.7546	50.3825	1.36298	2.00165	1.76964	-0.071649	0.386843	9867
(11159704,11169600)(11881188,11891188)(11881188,11891188)	NC_044998.1	11886188	25.027	30.8907	16.9746	30.3696	30.6301	0.94272	0.964481	0.699304	0.019875	0.230435	9896
(11169601,11179449)(11891189,11901189)(11891189,11901189)	NC_044998.1	11896189	28.3315	31.6493	17.7691	35.2558	33.4526	0.472535	0.855281	0.816374	-0.121657	0.186466	9848
(11179450,11189120)(11901190,11911190)(11901190,11911190)	NC_044998.1	11906190	38.3388	46.0967	16.4991	51.9335	49.0151	0.821103	1.36533	1.26642	-0.145856	0.288559	9670
(11189121,11199021)(11911191,11921191)(11911191,11921191)	NC_044998.1	11916191	39.5361	48.6554	17.3611	61.9574	55.3064	0.936417	1.40147	1.24857	-0.3224	0.413489	9900
(11199022,11208411)(11921192,11931192)(11921192,11931192)	NC_044998.1	11926192	45.2324	54.5236	21.2675	73.04	63.7818	0.835566	1.30775	1.18576	-0.392596	0.425773	9389
(11208412,11217610)(11931193,11941193)(11931193,11941193)	NC_044998.1	11936193	39.5678	45.7162	25.2816	60.0834	52.8998	0.630866	0.914432	0.803773	-0.347938	0.349285	9198
(11217611,11226889)(11941194,11951194)(11941194,11951194)	NC_044998.1	11946194	39.0166	44.4463	27.6304	39.6154	42.0308	0.564856	0.762733	0.649274	0.118634	0.08007	9278
(11226890,11236710)(11951195,11961195)(11951195,11961195)	NC_044998.1	11956195	43.5076	56.0383	17.6079	51.5255	53.7819	1.17094	1.56914	1.33032	0.099452	0.245076	9820
(11236711,11245958)(11961196,11971196)(11961196,11971196)	NC_044998.1	11966196	53.2361	65.2916	24.0981	68.8254	67.0585	0.923064	1.38299	1.23191	-0.063718	0.270013	9247
(11245959,11255886)(11971197,11981197)(11971197,11981197)	NC_044998.1	11976197	35.8305	43.6428	14.6619	37.5462	40.5945	0.88376	1.42676	1.30946	0.16293	0.137653	9927
(11255887,11265709)(11981198,11991198)(11981198,11991198)	NC_044998.1	11986198	33.8149	37.4406	17.7092	50.6835	44.062	0.434156	1.02687	1.05276	-0.374848	0.313479	9822
(11265710,11275422)(11991199,12001199)(11991199,12001199)	NC_044998.1	11996199	37.7184	46.5041	8.79958	55.4219	50.963	0.944935	1.76684	1.70329	-0.226482	0.363786	9712
(11275423,11285351)(12001200,12011200)(12001200,12011200)	NC_044998.1	12006200	37.7127	46.2255	8.92859	55.1862	50.7058	0.915729	1.74799	1.6956	-0.227606	0.356935	9928
(11285352,11295168)(12011201,12021201)(12011201,12021201)	NC_044998.1	12016201	37.7625	48.2826	9.3675	43.7594	46.021	1.13019	1.82152	1.67057	0.114742	0.226575	9816
(11295169,11304977)(12021202,12031202)(12021202,12031202)	NC_044998.1	12026202	28.0189	32.2977	12.2112	35.2863	33.792	0.616048	1.25083	1.23463	-0.101928	0.212511	9808
(11304978,11314889)(12031203,12041203)(12031203,12041203)	NC_044998.1	12036203	32.5449	39.2976	9.76038	34.1798	36.7387	0.839564	1.59459	1.54451	0.15047	0.133227	9911
(11314890,11324568)(12041204,12051204)(12041204,12051204)	NC_044998.1	12046204	33.1542	43.7627	11.8371	44.3496	44.0561	1.29516	1.6932	1.4198	-0.016941	0.340059	9678
(11324569,11334463)(12051205,12061205)(12051205,12061205)	NC_044998.1	12056205	39.1773	51.3041	12.6978	52.6943	51.9992	1.25649	1.74419	1.50401	-0.034	0.339227	9894
(11334464,11344315)(12061206,12071206)(12061206,12071206)	NC_044998.1	12066206	28.8111	30.6713	21.3973	32.8933	31.7823	0.260617	0.562399	0.564016	-0.073719	0.106416	9851
(11344316,11354132)(12071207,12081207)(12071207,12081207)	NC_044998.1	12076207	28.5069	35.2011	6.553	45.9046	40.5528	0.947662	1.75493	1.68699	-0.358857	0.435956	9816
(11354133,11363828)(12081208,12091208)(12081208,12091208)	NC_044998.1	12086208	46.3381	60.657	11.797	77.1679	68.9124	1.25739	1.87693	1.66977	-0.341768	0.505925	9695
(11363829,11373521)(12091209,12101209)(12091209,12101209)	NC_044998.1	12096209	29.3408	39.978	2.61471	40.6275	40.3027	1.46395	2.22685	1.99855	-0.021163	0.385638	9692
(11373522,11383392)(12101210,12111210)(12101210,12111210)	NC_044998.1	12106210	38.4761	57.4255	1.75358	57.4535	57.4395	1.99859	2.55932	2.12217	-0.000698	0.510736	9870
(11383393,11393299)(12111211,12121211)(12111211,12121211)	NC_044998.1	12116211	26.033	39.1679	1.99203	48.2132	43.6906	2.03203	2.48224	2.01208	-0.33179	0.698649	9906
(11393300,11403110)(12121212,12131212)(12121212,12131212)	NC_044998.1	12126212	34.401	46.7502	3.05134	49.7721	48.2611	1.45402	2.23706	2.01595	-0.084089	0.416887	9810
(11403111,11412966)(12131213,12141213)(12131213,12141213)	NC_044998.1	12136213	40.6234	52.7364	12.0909	46.5584	49.6474	1.21105	1.77325	1.5653	0.145754	0.23035	9855
(11412967,11422771)(12141214,12151214)(12141214,12151214)	NC_044998.1	12146214	30.5461	37.1317	11.659	34.651	35.8913	0.8713	1.46101	1.3596	0.077665	0.180743	9804
(11422772,11432355)(12151215,12161215)(12151215,12161215)	NC_044998.1	12156215	38.0108	48.4872	7.0573	51.4139	49.9506	1.11826	1.92704	1.80972	-0.07376	0.325459	9583
(11432356,11442092)(12161216,12171216)(12161216,12171216)	NC_044998.1	12166216	50.8245	61.1468	23.3315	78.974	70.0604	0.827399	1.32809	1.21566	-0.336614	0.393419	9736
(11442093,11450858)(12171217,12181217)(12171217,12181217)	NC_044998.1	12176217	32.8473	39.1562	13.0249	36.6246	37.8904	0.777298	1.39829	1.33196	0.073752	0.158755	8765
(11450859,11460572)(12181218,12191218)(12181218,12191218)	NC_044998.1	12186218	43.3133	55.2519	14.4231	46.2319	50.7419	1.12054	1.6743	1.49033	0.199667	0.177981	9713
(11460573,11470153)(12191219,12201219)(12191219,12201219)	NC_044998.1	12196219	52.3639	63.353	16.0132	73.0538	68.2034	0.855258	1.61508	1.56161	-0.177812	0.31452	9580
(11470154,11479971)(12201220,12211220)(12201220,12211220)	NC_044998.1	12206220	31.7984	39.5736	17.4793	49.4197	44.4966	0.988947	1.21954	0.992268	-0.296227	0.412722	9817
(11479972,11489903)(12211221,12221221)(12211221,12221221)	NC_044998.1	12216221	32.3124	36.0829	26.3388	50.1163	43.0996	0.472098	0.529665	0.407704	-0.415541	0.345115	9931
(11489904,11499655)(12221222,12231222)(12221222,12231222)	NC_044998.1	12226222	29.3691	40.4756	7.52393	48.2017	44.3387	1.52709	1.96211	1.63207	-0.251499	0.526124	9751
(11499656,11509267)(12231223,12241223)(12231223,12241223)	NC_044998.1	12236223	34.289	40.3751	13.6027	47.382	43.8786	0.718887	1.37484	1.33438	-0.195613	0.289365	9611
(11509268,11519153)(12241224,12251224)(12241224,12251224)	NC_044998.1	12246224	23.2542	31.7362	5.10213	35.2267	33.4815	1.46494	1.97839	1.68839	-0.14316	0.452012	9885
(11519154,11528561)(12251225,12261225)(12251225,12261225)	NC_044998.1	12256225	26.7941	30.9094	11.0337	36.0081	33.4587	0.618986	1.29135	1.28382	-0.181766	0.256344	9407
(11528562,11538147)(12261226,12271226)(12261226,12271226)	NC_044998.1	12266226	31.0344	39.4885	13.8047	44.0492	41.7689	1.10126	1.45099	1.22181	-0.140557	0.357349	9585
(11538148,11547685)(12271227,12281227)(12271227,12281227)	NC_044998.1	12276227	35.5749	50.9663	7.91672	56.7381	53.8522	1.75345	2.13401	1.72261	-0.155351	0.531857	9537
(11547686,11557473)(12281228,12291228)(12281228,12291228)	NC_044998.1	12286228	39.4056	51.3124	12.9172	60.9115	56.112	1.22665	1.72496	1.49617	-0.23342	0.439468	9787
(11557474,11566756)(12291229,12301229)(12291229,12301229)	NC_044998.1	12296229	31.9843	41.4038	11.5024	42.2736	41.8387	1.19126	1.6413	1.41151	-0.026017	0.318455	9282
(11566757,11576590)(12301230,12311230)(12301230,12311230)	NC_044998.1	12306230	31.6123	34.8365	25.0236	45.9044	40.3705	0.41247	0.54469	0.459121	-0.334928	0.286312	9833
(11576591,11586406)(12311231,12321231)(12311231,12321231)	NC_044998.1	12316231	33.0329	34.8765	23.7312	33.3037	34.0901	0.225893	0.593178	0.621688	0.045563	0.033097	9815
(11586407,11596117)(12321232,12331232)(12321232,12331232)	NC_044998.1	12326232	45.0389	53.4459	15.6847	60.2227	56.8343	0.759252	1.49108	1.45842	-0.1443	0.271896	9710
(11596118,11605784)(12331233,12341233)(12331233,12341233)	NC_044998.1	12336233	37.0182	41.2749	13.2682	45.3664	43.3206	0.466342	1.33627	1.42412	-0.10586	0.176339	9666
(11605785,11615158)(12341234,12351234)(12341234,12351234)	NC_044998.1	12346234	38.7558	45.3335	12.5121	45.2986	45.316	0.688827	1.49836	1.50613	0.000864	0.175427	9373
(11615159,11624955)(12351235,12361235)(12351235,12361235)	NC_044998.1	12356235	40.1806	52.6944	10.5197	49.015	50.8547	1.2647	1.85952	1.64439	0.087756	0.275438	9796
(11624956,11634716)(12361236,12371236)(12361236,12371236)	NC_044998.1	12366236	46.6699	57.1954	16.9086	70.0529	63.6241	0.91779	1.53693	1.42885	-0.264264	0.377296	9760
(11634717,11644286)(12371237,12381237)(12371237,12381237)	NC_044998.1	12376237	40.6499	47.8344	15.0465	60.5874	54.2109	0.717833	1.42954	1.40374	-0.30068	0.345937	9569
(11644287,11654178)(12381238,12391238)(12381238,12391238)	NC_044998.1	12386238	39.9478	46.7604	9.61281	58.3617	52.5611	0.692459	1.64707	1.69116	-0.278303	0.327349	9891
(11654179,11663323)(12391239,12401239)(12391239,12401239)	NC_044998.1	12396239	35.9924	43.9611	9.8951	49.2132	46.5871	0.897466	1.66986	1.60741	-0.139735	0.30477	9144
(11663324,11673180)(12401240,12411240)(12401240,12411240)	NC_044998.1	12406240	34.555	41.0911	14.3992	51.6027	46.3469	0.7662	1.36059	1.29063	-0.29121	0.353118	9856
(11673181,11683108)(12411241,12421241)(12411241,12421241)	NC_044998.1	12416241	25.6941	29.964	11.871	29.7302	29.8471	0.669085	1.22316	1.17122	0.00869	0.166446	9927
(11683109,11693022)(12421242,12431242)(12421242,12431242)	NC_044998.1	12426242	47.9287	63.9355	3.54165	79.3882	71.6618	1.35957	2.24533	2.07704	-0.309308	0.514424	9913
(11693023,11702781)(12431243,12441243)(12431243,12441243)	NC_044998.1	12436243	43.0342	55.4552	7.49807	64.1591	59.8071	1.17328	1.97895	1.84458	-0.193913	0.40444	9758
(11702782,11712537)(12441244,12451244)(12441244,12451244)	NC_044998.1	12446244	37.2763	44.5912	12.838	60.4546	52.5229	0.795925	1.50493	1.4557	-0.407621	0.423677	9755
(11712538,11722098)(12451245,12461245)(12451245,12461245)	NC_044998.1	12456245	44.9683	49.0966	21.2607	54.9963	52.0465	0.373414	1.10083	1.17965	-0.12582	0.163412	9560
(11722099,11731883)(12461246,12471246)(12461246,12471246)	NC_044998.1	12466246	31.5863	39.2557	12.005	29.8975	34.5766	0.981919	1.51381	1.36556	0.283422	0.097834	9784
(11731884,11740939)(12471247,12481247)(12471247,12481247)	NC_044998.1	12476247	49.605	65.9364	17.0735	72.8093	69.3728	1.34085	1.75704	1.4726	-0.132949	0.414141	9055
(11740940,11750841)(12481248,12491248)(12481248,12491248)	NC_044998.1	12486248	37.5036	42.5336	15.4578	48.8796	45.7066	0.544051	1.27577	1.30558	-0.162084	0.226586	9901
(11750842,11760241)(12491249,12501249)(12491249,12501249)	NC_044998.1	12496249	45.1719	53.2542	16.5775	69.3509	61.3025	0.727806	1.44413	1.41664	-0.341746	0.370743	9399
(11760242,11770053)(12501250,12511250)(12501250,12511250)	NC_044998.1	12506250	35.885	43.2047	11.6238	52.5539	47.8793	0.826797	1.5525	1.49859	-0.24948	0.346048	9811
(11770054,11779714)(12511251,12521251)(12511251,12521251)	NC_044998.1	12516251	51.8222	58.3662	26.4999	91.9711	75.1687	0.514565	1.09822	1.09883	-0.622374	0.468384	9660
(11779715,11789366)(12521252,12531252)(12521252,12531252)	NC_044998.1	12526252	54.1302	62.5626	33.521	89.249	75.9058	0.635109	0.959344	0.857384	-0.473271	0.418412	9651
(11789367,11798899)(12531253,12541253)(12531253,12541253)	NC_044998.1	12536253	48.3704	55.804	34.1578	76.146	65.975	0.625704	0.797639	0.659201	-0.403477	0.37814	9532
(11798900,11808219)(12541254,12551254)(12541254,12551254)	NC_044998.1	12546254	43.3161	52.831	26.3129	67.749	60.29	0.893006	1.08738	0.877068	-0.330209	0.406653	9319
(11808220,11817822)(12551256,12561255)(12551255,12561255)	NC_044998.1	12556255	53.3971	69.7379	31.6371	87.6489	78.6934	1.24745	1.27541	0.917293	-0.321983	0.492672	9602
(11817823,11827396)(12561256,12571256)(12561256,12571256)	NC_044998.1	12566256	42.6158	50.5128	27.5712	81.9443	66.2285	0.753161	0.955664	0.788289	-0.707095	0.574891	9573
(11827397,11836593)(12571257,12581257)(12571257,12581257)	NC_044998.1	12576257	36.9944	46.1386	24.6303	56.1734	51.156	1.00242	1.02684	0.741843	-0.259803	0.396485	9196
(11836594,11846352)(12581258,12591258)(12581258,12591258)	NC_044998.1	12586258	52.0743	64.4704	44.5619	74.0438	69.2571	0.970059	0.682882	0.324467	-0.17645	0.343073	9758
(11846353,11856049)(12591259,12601259)(12591259,12601259)	NC_044998.1	12596259	34.8035	39.2805	32.438	59.8595	49.57	0.521141	0.346398	0.150436	-0.566079	0.439084	9696
(11856050,11865895)(12601260,12611260)(12601260,12611260)	NC_044998.1	12606260	43.6146	55.6487	30.7759	72.9576	64.3031	1.12182	1.01317	0.657897	-0.380524	0.49229	9845
(11865896,11875737)(12611261,12621261)(12611261,12621261)	NC_044998.1	12616261	49.3261	52.3433	45.9953	67.5874	59.9654	0.24911	0.229518	0.151595	-0.296535	0.224144	9841
(11875738,11885521)(12621262,12631262)(12621262,12631262)	NC_044998.1	12626262	44.0928	42.8383	36.226	55.1467	48.9925	-0.115697	0.266518	0.398917	-0.267674	0.115338	9783
(11885522,11895074)(12631263,12641263)(12631263,12641263)	NC_044998.1	12636263	49.1168	50.1772	44.2296	58.3098	54.2435	0.087917	0.215931	0.223351	-0.158869	0.108462	9552
(11895075,11904136)(12641264,12651264)(12641264,12651264)	NC_044998.1	12646264	41.885	45.5636	33.0338	57.7676	51.6656	0.35687	0.53074	0.471541	-0.279304	0.24223	9061
(11904137,11913920)(12651265,12661265)(12651265,12661265)	NC_044998.1	12656265	46.1421	46.98	41.7702	65.0736	56.0268	0.073894	0.200956	0.212207	-0.376112	0.222464	9783
(11913921,11923187)(12661266,12671266)(12661266,12671266)	NC_044998.1	12666266	42.0482	47.4557	31.9359	54.6102	51.0329	0.522584	0.654925	0.536719	-0.163108	0.221665	9266
(11923188,11932914)(12671267,12681267)(12671267,12681267)	NC_044998.1	12676267	36.7861	41.0909	33.3678	42.3333	41.7121	0.474536	0.37072	0.206204	-0.032348	0.138686	9726
(11932915,11942710)(12681268,12691268)(12681268,12691268)	NC_044998.1	12686268	45.8485	48.4156	39.2739	46.7862	47.6009	0.227802	0.354803	0.321091	0.034086	0.039689	9795
(11942711,11952349)(12691269,12701269)(12691269,12701269)	NC_044998.1	12696269	34.8693	36.4681	29.1422	51.3951	43.9316	0.185753	0.3702	0.363576	-0.409838	0.268965	9638
(11952350,11962022)(12701270,12711270)(12701270,12711270)	NC_044998.1	12706270	41.578	48.5265	33.154	51.977	50.2517	0.678992	0.655792	0.451962	-0.079548	0.216385	9672
(11962023,11971848)(12711271,12721271)(12711271,12721271)	NC_044998.1	12716271	44.3515	53.3952	32.7149	66.2416	59.8184	0.829237	0.828849	0.586768	-0.277755	0.361992	9825
(11971849,11981643)(12721272,12731272)(12721272,12731272)	NC_044998.1	12726272	58.6166	65.6882	41.3771	78.2866	71.9874	0.492278	0.743149	0.663917	-0.206404	0.237416	9794
(11981644,11990087)(12731273,12741273)(12731273,12741273)	NC_044998.1	12736273	39.842	46.813	24.3888	64.7658	55.7894	0.710414	0.996803	0.863699	-0.431803	0.414965	8443
(11990088,11999603)(12741274,12751274)(12741274,12751274)	NC_044998.1	12746274	38.393	40.6329	29.6061	43.3824	42.0077	0.236744	0.507973	0.508838	-0.068612	0.097561	9515
(11999604,12009139)(12751275,12761275)(12751275,12761275)	NC_044998.1	12756275	51.6266	69.0845	24.4378	75.1555	72.12	1.37789	1.54434	1.18415	-0.112859	0.412688	9535
(12009140,12018849)(12761276,12771276)(12761276,12771276)	NC_044998.1	12766276	29.0882	35.5139	16.3517	34.0636	34.7887	0.89186	1.15151	0.96023	0.047662	0.202256	9709
(12018850,12028536)(12771277,12781277)(12771277,12781277)	NC_044998.1	12776277	35.0717	42.121	19.152	55.0537	48.5874	0.814407	1.15427	1.00507	-0.353047	0.39886	9686
(12028537,12031281)(12781278,12791278)(12781278,12791278)	NC_044998.1	12786278	14.6849	19.0968	9.1359	19.1224	19.1096	1.18883	1.13356	0.786742	-0.001647	0.306007	2744
(12031282,12040620)(12791279,12801279)(12791279,12801279)	NC_044998.1	12796279	38.1211	45.357	23.5482	50.0195	47.6883	0.770158	1.01157	0.849659	-0.117171	0.260038	9338
(12040621,12050230)(12801280,12811280)(12801280,12811280)	NC_044998.1	12806280	39.4368	44.8606	21.2994	53.3531	49.1068	0.558322	1.05771	1.0237	-0.206348	0.254174	9609
(12050231,12060068)(12811281,12821281)(12811281,12821281)	NC_044998.1	12816281	41.4078	50.6763	16.4024	65.4942	58.0852	0.909362	1.46793	1.34688	-0.343012	0.417744	9837
(12060069,12069783)(12821282,12831282)(12821282,12831282)	NC_044998.1	12826282	48.6658	63.0688	15.1212	59.8825	61.4756	1.20505	1.75641	1.54674	0.062818	0.273496	9714
(12069784,12079328)(12831283,12841283)(12831283,12841283)	NC_044998.1	12836283	47.3821	55.7119	23.1182	61.3751	58.5435	0.715563	1.22533	1.14803	-0.114658	0.24469	9544
(12079329,12089049)(12841284,12851284)(12841284,12851284)	NC_044998.1	12846284	33.4828	38.1404	18.5041	43.8905	41.0155	0.563154	1.03164	0.988324	-0.164361	0.23269	9720
(12089050,12098825)(12851285,12861285)(12851285,12861285)	NC_044998.1	12856285	45.6356	53.1157	25.4663	78.8894	66.0026	0.666827	1.07797	0.989468	-0.541671	0.463405	9775
(12098826,12108712)(12861286,12871286)(12861286,12871286)	NC_044998.1	12866286	42.9873	47.8083	27.5654	48.3198	48.064	0.455883	0.836204	0.801347	-0.011406	0.122546	9886
(12108713,12118563)(12871287,12881287)(12871287,12881287)	NC_044998.1	12876287	35.1356	39.6491	24.7489	40.2747	39.9619	0.520506	0.747478	0.654617	-0.017047	0.142172	9850
(12118564,12128387)(12881288,12891288)(12881288,12891288)	NC_044998.1	12886288	32.8315	34.9345	24.8786	38.9682	36.9514	0.259229	0.53834	0.534636	-0.117567	0.129753	9823
(12128388,12138053)(12891289,12901289)(12891289,12901289)	NC_044998.1	12896289	33.4122	36.2021	33.5646	36.7456	36.4738	0.338026	0.138847	-0.010074	-0.015567	0.094773	9665
(12138054,12147847)(12901290,12911290)(12901290,12911290)	NC_044998.1	12906290	40.0086	45.6886	32.8089	54.988	50.3383	0.576477	0.570235	0.400799	-0.222743	0.267681	9793
(12147848,12157725)(12911291,12921291)(12911291,12921291)	NC_044998.1	12916291	52.5721	56.7167	36.2401	54.7583	55.7375	0.321309	0.695905	0.698926	0.035757	0.062609	9877
(12157726,12167483)(12921292,12931292)(12921292,12931292)	NC_044998.1	12926292	34.6225	37.1719	33.0492	38.4575	37.8147	0.298278	0.209756	0.100556	-0.035547	0.095408	9757
(12167484,12177274)(12931293,12941293)(12931293,12941293)	NC_044998.1	12936293	43.5146	44.3782	34.3456	59.4816	51.9299	0.080683	0.409573	0.470887	-0.332797	0.200699	9790
(12177275,12187176)(12941294,12951294)(12941294,12951294)	NC_044998.1	12946294	36.1571	40.8966	22.9846	38.4951	39.6958	0.531383	0.874173	0.807809	0.063604	0.101337	9901
(12187177,12196941)(12951295,12961295)(12951295,12961295)	NC_044998.1	12956295	46.6944	51.793	28.0134	58.6407	55.2168	0.444358	0.906725	0.896422	-0.14067	0.18956	9764
(12196942,12202756)(12961296,12971321)(12961296,12971296)	NC_044998.1	12966296	26.4922	29.0613	20.8986	22.3129	25.6871	0.390724	0.536069	0.460522	0.243288	-0.031312	5814
(12202756,12212329)(12971321,12981297)(12971297,12981297)	NC_044998.1	12976297	43.3868	46.7861	30.4455	56.6544	51.7202	0.318524	0.668993	0.666498	-0.21808	0.199327	9573
(12212330,12222206)(12981298,12991298)(12981298,12991298)	NC_044998.1	12986298	30.6522	29.7053	22.4583	37.9392	33.8223	-0.124851	0.414286	0.587911	-0.256904	0.106826	9876
(12222207,12231568)(12991299,13001299)(12991299,13001299)	NC_044998.1	12996299	33.1673	38.1553	26.8979	49.5428	43.8491	0.608733	0.596817	0.417407	-0.328573	0.333061	9361
(12231569,12241225)(13001300,13011300)(13001300,13011300)	NC_044998.1	13006300	31.4449	36.9641	22.6573	45.5007	41.2324	0.709749	0.798176	0.615442	-0.259691	0.321638	9656
(12241226,12251119)(13011301,13021301)(13011301,13021301)	NC_044998.1	13016301	40.941	46.447	42.1663	62.562	54.5045	0.546279	0.185353	-0.066724	-0.377264	0.343573	9893
(12251120,12260887)(13021302,13031302)(13021302,13031302)	NC_044998.1	13026302	35.0722	38.0581	21.1789	41.5053	39.7817	0.34495	0.848222	0.877124	-0.094103	0.138979	9767
(12260888,12270683)(13031303,13041303)(13031303,13041303)	NC_044998.1	13036303	36.0914	38.1328	22.8891	37.596	37.8644	0.22929	0.745257	0.811046	0.014244	0.050864	9795
(12270684,12280518)(13041304,13051304)(13041304,13051304)	NC_044998.1	13046304	29.3149	27.9894	27.693	36.2829	32.1362	-0.182587	0.017681	0.12139	-0.270462	0.099336	9834
(12280519,12290287)(13051305,13061305)(13051305,13061305)	NC_044998.1	13056305	54.1281	60.6597	27.5073	67.9188	64.2892	0.491962	1.09518	1.10752	-0.128742	0.19525	9768
(12290288,12300150)(13061306,13071306)(13061306,13071306)	NC_044998.1	13066306	48.3811	57.3408	21.9534	69.6333	63.4871	0.753983	1.3037	1.2255	-0.243764	0.324396	9862
(12300151,12309397)(13071307,13081307)(13071307,13081307)	NC_044998.1	13076307	49.4916	59.2965	19.6521	53.6379	56.4672	0.80683	1.42873	1.35373	0.109708	0.146472	9246
(12309398,12319219)(13081308,13091308)(13081308,13091308)	NC_044998.1	13086308	50.1919	60.97	18.0633	60.3258	60.6479	0.87469	1.52534	1.43793	0.012316	0.216519	9821
(12319220,12329067)(13091309,13101309)(13091309,13101309)	NC_044998.1	13096309	57.9883	68.4404	24.7387	77.1145	72.7774	0.735413	1.34999	1.29394	-0.143643	0.265423	9847
(12329068,12338421)(13101310,13111310)(13101310,13111310)	NC_044998.1	13106310	38.781	44.2656	26.9176	46.8612	45.5634	0.573979	0.791476	0.680423	-0.064126	0.18125	9353
(12338422,12348330)(13111311,13121311)(13111311,13121311)	NC_044998.1	13116311	50.9657	57.2571	30.2873	55.589	56.4231	0.502911	0.944641	0.911892	0.031409	0.111308	9908
(12348331,12358216)(13121312,13131312)(13121312,13131312)	NC_044998.1	13126312	41.0005	49.7813	14.6941	50.0394	49.9104	0.869949	1.51717	1.43045	-0.006034	0.225369	9885
(12358217,12367849)(13131313,13141313)(13131313,13141313)	NC_044998.1	13136313	28.7217	34.6722	10.3239	37.5872	36.1297	0.836212	1.48092	1.40375	-0.09701	0.266133	9632
(12367850,12377733)(13141314,13151314)(13141314,13151314)	NC_044998.1	13146314	41.4028	44.5727	26.6989	43.7021	44.1374	0.311052	0.765614	0.792091	0.020156	0.068507	9883
(12377734,12387646)(13151315,13161315)(13151315,13161315)	NC_044998.1	13156315	43.8137	50.8731	21.9796	47.2239	49.0485	0.655121	1.17177	1.11396	0.079864	0.124002	9912
(12387647,12397573)(13161316,13171316)(13161316,13171316)	NC_044998.1	13166316	49.8541	53.6528	20.9543	63.7341	58.6935	0.310344	1.17009	1.30189	-0.194041	0.18427	9926
(12397574,12407495)(13171317,13181317)(13171317,13181317)	NC_044998.1	13176317	45.0623	51.9979	15.411	54.1425	53.0702	0.626046	1.44398	1.47245	-0.045643	0.184495	9921
(12407496,12417372)(13181318,13191318)(13181318,13191318)	NC_044998.1	13186318	41.3314	44.5449	16.7969	47.2155	45.8802	0.315863	1.19055	1.32385	-0.061935	0.114149	9876
(12417373,12427312)(13191319,13201319)(13191319,13201319)	NC_044998.1	13196319	33.1621	35.7062	16.9768	31.447	33.5766	0.310536	0.993102	1.07775	0.122912	0.012928	9939
(12427313,12437084)(13201320,13211320)(13201320,13211320)	NC_044998.1	13206320	31.2122	36.0769	11.0544	26.1571	31.117	0.630143	1.40594	1.42173	0.303999	-0.003153	9771
(12437085,12446988)(13211321,13221321)(13211321,13221321)	NC_044998.1	13216321	43.3907	52.6365	14.9799	61.6156	57.1261	0.866281	1.54156	1.46308	-0.198411	0.328506	9903
(12446989,12456881)(13221322,13231322)(13221322,13231322)	NC_044998.1	13226322	38.582	47.215	10.4882	51.1809	49.1979	0.90806	1.68393	1.61926	-0.098482	0.285142	9892
(12456882,12465929)(13231323,13241323)(13231323,13241323)	NC_044998.1	13236323	37.0139	41.2875	16.3831	58.9986	50.143	0.468253	1.18838	1.23722	-0.458303	0.367391	9047
(12465930,12475901)(13241324,13251324)(13241324,13251324)	NC_044998.1	13246324	30.5616	37.369	6.14233	41.662	39.5155	0.900197	1.79017	1.757	-0.134339	0.302613	9971
(12475902,12485403)(13251325,13261325)(13251325,13261325)	NC_044998.1	13256325	38.6351	45.2594	19.5996	62.9787	54.1191	0.695834	1.17495	1.09572	-0.439408	0.415332	9501
(12485404,12495125)(13261326,13271326)(13261326,13271326)	NC_044998.1	13266326	42.1272	45.6168	25.5005	44.0838	44.8503	0.336621	0.847361	0.880887	0.034885	0.067059	9721
(12495126,12504965)(13271327,13281327)(13271327,13281327)	NC_044998.1	13276327	42.9226	48.7208	22.7785	61.9706	55.3457	0.549097	1.0732	1.04824	-0.295954	0.300323	9839
(12504966,12514615)(13281328,13291328)(13281328,13291328)	NC_044998.1	13286328	47.3284	54.9442	31.6387	64.5011	59.7226	0.654954	0.877107	0.743163	-0.193708	0.27202	9649
(12514616,12524418)(13291329,13301329)(13291329,13301329)	NC_044998.1	13296329	43.3545	47.4356	30.9762	62.6475	55.0415	0.382688	0.674344	0.637962	-0.336419	0.279747	9802
(12524419,12534092)(13301330,13311330)(13301330,13311330)	NC_044998.1	13306330	42.4981	42.1389	33.7817	64.8208	53.4799	-0.034345	0.349065	0.457927	-0.511664	0.268102	9673
(12534093,12543965)(13311331,13321331)(13311331,13321331)	NC_044998.1	13316331	42.2093	48.8398	34.4121	47.6274	48.2336	0.638362	0.606595	0.41233	0.027535	0.148065	9872
(12543966,12553864)(13321332,13331332)(13321332,13331332)	NC_044998.1	13326332	43.771	48.948	22.2659	64.6649	56.8064	0.480906	1.08311	1.09821	-0.344297	0.309088	9898
(12553865,12563324)(13331333,13341333)(13331333,13341333)	NC_044998.1	13336333	39.4958	49.5866	18.4142	55.6808	52.6337	1.03723	1.39739	1.18817	-0.147854	0.344819	9459
(12563325,12572060)(13341334,13351334)(13341334,13351334)	NC_044998.1	13346334	37.2461	45.5983	24.6972	55.6037	50.601	0.909513	0.991371	0.748072	-0.257303	0.371406	8735
(12572061,12581652)(13351335,13361335)(13351335,13361335)	NC_044998.1	13356335	34.8089	41.504	16.5094	51.0872	46.2956	0.779216	1.26516	1.16362	-0.26357	0.341506	9591
(12581653,12591134)(13361336,13371336)(13361336,13371336)	NC_044998.1	13366336	45.0411	49.8462	24.5923	54.8067	52.3264	0.433933	0.997151	1.01592	-0.10562	0.167926	9481
(12591135,12600994)(13371337,13381337)(13371337,13381337)	NC_044998.1	13376337	37.8343	46.718	15.4495	50.0429	48.3805	0.952607	1.46093	1.31458	-0.084184	0.288795	9859
(12600995,12610467)(13381338,13391338)(13381338,13391338)	NC_044998.1	13386338	36.5089	43.6051	16.4392	49.1067	46.3559	0.788089	1.31353	1.21946	-0.144319	0.279308	9472
(12610468,12620287)(13391339,13401339)(13391339,13401339)	NC_044998.1	13396339	39.1324	45.2578	25.9039	55.0529	50.1553	0.635377	0.875349	0.75219	-0.239835	0.291961	9819
(12620288,12630110)(13401340,13411340)(13401340,13411340)	NC_044998.1	13406340	36.3792	40.7501	24.4928	57.7371	49.2436	0.487114	0.788766	0.724695	-0.447181	0.366176	9822
(12630111,12639938)(13411341,13421341)(13411341,13421341)	NC_044998.1	13416341	36.1016	45.2764	18.0494	52.2031	48.7398	1.03024	1.33075	1.10868	-0.183736	0.362468	9827
(12639939,12649760)(13421342,13431342)(13421342,13431342)	NC_044998.1	13426342	27.7054	35.1578	15.4673	42.5285	38.8431	1.08485	1.23935	0.96602	-0.254199	0.414547	9821
(12649761,12659260)(13431343,13441343)(13431343,13441343)	NC_044998.1	13436343	32.8524	41.1719	15.0408	54.3118	47.7419	1.02486	1.39807	1.19667	-0.38274	0.468644	9499
(12659261,12669133)(13441344,13451344)(13441344,13451344)	NC_044998.1	13446344	31.6175	38.3265	13.7925	44.8372	41.5818	0.858115	1.3616	1.24192	-0.19699	0.325686	9872
(12669134,12679033)(13451345,13461345)(13451345,13461345)	NC_044998.1	13456345	34.627	38.0551	19.9455	52.033	45.044	0.401042	0.921273	0.938229	-0.386443	0.311309	9899
(12679034,12688468)(13461346,13471346)(13461346,13471346)	NC_044998.1	13466346	40.9222	45.2902	23.9411	63.1329	54.2115	0.43356	0.924836	0.925068	-0.417901	0.336779	9434
(12688469,12697993)(13471347,13481347)(13471347,13481347)	NC_044998.1	13476347	30.0775	42.2639	11.6665	44.8113	43.5376	1.63691	1.78101	1.34486	-0.080988	0.46211	9524
(12697994,12707657)(13481348,13491348)(13481348,13491348)	NC_044998.1	13486348	45.1575	57.2748	25.7214	65.2437	61.2592	1.0915	1.24278	0.963215	-0.16924	0.370196	9663
(12707658,12717544)(13491349,13501349)(13491349,13501349)	NC_044998.1	13496349	35.2279	41.8407	17.8974	63.5495	52.6951	0.760648	1.19811	1.08952	-0.590018	0.51322	9886
(12717545,12726809)(13501350,13511350)(13501350,13511350)	NC_044998.1	13506350	34.3202	42.1417	9.83452	51.4118	46.7767	0.92305	1.65763	1.57809	-0.25856	0.37554	9264
(12726810,12736606)(13511351,13521351)(13511351,13521351)	NC_044998.1	13516351	48.2532	65.4746	15.0353	66.6647	66.0697	1.45302	1.86301	1.54431	-0.023661	0.383607	9796
(12736607,12746534)(13521352,13531352)(13521352,13531352)	NC_044998.1	13526352	31.4589	44.1512	7.91887	51.974	48.0626	1.63146	2.02054	1.64794	-0.237873	0.545394	9927
(12746535,12756369)(13531353,13541353)(13531353,13541353)	NC_044998.1	13536353	33.1962	42.936	13.9952	48.8916	45.9138	1.18763	1.53304	1.27732	-0.171691	0.3962	9834
(12756370,12765904)(13541354,13551354)(13541354,13551354)	NC_044998.1	13546354	34.6253	41.0324	18.4871	48.9897	45.011	0.74957	1.14698	1.03138	-0.220004	0.310386	9534
(12765905,12775607)(13551355,13561362)(13551355,13561355)	NC_044998.1	13556355	37.5599	48.3314	13.3081	53.0562	50.6938	1.16333	1.64786	1.43417	-0.120498	0.362249	9702
(12775607,12785312)(13561362,13571356)(13561356,13571356)	NC_044998.1	13566356	33.462	45.9073	9.04067	53.8748	49.891	1.50569	1.93802	1.61232	-0.227882	0.507817	9705
(12785313,12795223)(13571357,13581357)(13571357,13581357)	NC_044998.1	13576357	24.8941	31.9817	18.5544	36.8918	34.4367	1.14544	0.935303	0.553315	-0.188257	0.394512	9910
(12795224,12805147)(13581358,13591359)(13581358,13591358)	NC_044998.1	13586358	36.0855	47.347	23.5306	44.5254	45.9362	1.26511	1.16455	0.771389	0.07488	0.282647	9923
(12805147,12814930)(13591359,13601359)(13591359,13601359)	NC_044998.1	13596359	38.9153	50.7406	15.6398	56.2865	53.5136	1.23337	1.5961	1.33054	-0.136545	0.388793	9783
(12814931,12824779)(13601360,13611360)(13601360,13611360)	NC_044998.1	13606360	26.3849	35.2347	12.2989	34.0629	34.6488	1.35128	1.51208	1.16414	0.042415	0.322696	9848
(12824780,12834740)(13611361,13621361)(13611361,13621361)	NC_044998.1	13616361	22.6809	30.9935	10.1354	36.2417	33.6176	1.47103	1.58617	1.19435	-0.220629	0.495331	9960
(12834741,12843935)(13621362,13631362)(13621362,13631362)	NC_044998.1	13626362	19.6282	25.378	8.8435	26.514	25.946	1.17094	1.43958	1.1738	-0.055083	0.329556	9194
(12843936,12853353)(13631363,13641475)(13631363,13641363)	NC_044998.1	13636363	28.528	38.178	13.064	36.3195	37.2488	1.36512	1.53736	1.18746	0.062266	0.315385	9417
(12853353,12863130)(13641475,13651364)(13641364,13651364)	NC_044998.1	13646364	24.2834	33.6846	14.2871	35.5933	34.639	1.55661	1.38323	0.892956	-0.075	0.438672	9777
(12863131,12872962)(13651365,13661365)(13651365,13661365)	NC_044998.1	13656365	23.4525	31.1231	9.90005	44.625	37.8741	1.31389	1.5639	1.25062	-0.549142	0.632109	9831
(12872963,12882838)(13661366,13671366)(13661366,13671366)	NC_044998.1	13666366	25.8955	35.1175	10.4754	36.2435	35.6805	1.43409	1.65363	1.297	-0.041521	0.389178	9875
(12882839,12892676)(13671367,13681367)(13671367,13681367)	NC_044998.1	13676367	32.8683	44.3613	12.3969	50.7035	47.5324	1.41512	1.70937	1.37473	-0.184647	0.46133	9837
(12892677,12902631)(13681368,13691368)(13681368,13691368)	NC_044998.1	13686368	30.5278	41.6042	14.9374	39.5767	40.5904	1.4663	1.53038	1.12293	0.063517	0.340453	9954
(12902632,12912476)(13691369,13701369)(13691369,13701369)	NC_044998.1	13696369	24.2215	28.6303	10.338	38.56	33.5951	0.731797	1.30756	1.24316	-0.391174	0.398069	9844
(12912477,12922408)(13701370,13711370)(13701370,13711370)	NC_044998.1	13706370	30.8556	40.2509	6.99094	48.6661	44.4585	1.23081	1.8894	1.7016	-0.260844	0.455422	9931
(12922409,12931804)(13711371,13721371)(13711371,13721371)	NC_044998.1	13716371	30.5306	41.2675	10.8178	38.1366	39.7021	1.42124	1.74732	1.41973	0.098071	0.310277	9395
(12931805,12941665)(13721372,13731372)(13721372,13731372)	NC_044998.1	13726372	29.5938	37.724	11.5699	49.1885	43.4563	1.10956	1.54609	1.33692	-0.370379	0.483575	9860
(12941666,12951495)(13731373,13741373)(13731373,13741373)	NC_044998.1	13736373	28.1844	34.613	11.4441	38.3078	36.4604	0.920268	1.43473	1.30023	-0.125279	0.30289	9829
(12951496,12961177)(13741374,13751374)(13741374,13751374)	NC_044998.1	13746374	35.1098	43.1068	15.5814	53.6942	48.4005	0.922892	1.3818	1.23162	-0.288713	0.391798	9681
(12961178,12971050)(13751375,13761375)(13751375,13761375)	NC_044998.1	13756375	43.5986	56.8709	15.7452	63.0939	59.9824	1.23769	1.67581	1.4278	-0.136858	0.390001	9872
(12971051,12980931)(13761376,13771376)(13761376,13771376)	NC_044998.1	13766376	40.0025	50.4595	18.1796	60.3332	55.3963	1.06147	1.42936	1.21502	-0.236536	0.398974	9880
(12980932,12990658)(13771377,13781377)(13771377,13781377)	NC_044998.1	13776377	32.2367	40.3487	15.4879	53.6298	46.9893	1.01803	1.3544	1.14566	-0.39418	0.473071	9726
(12990659,13000531)(13781378,13791378)(13781378,13791378)	NC_044998.1	13786378	23.4888	29.4251	12.7305	32.7386	31.0819	1.0153	1.22842	0.991348	-0.13456	0.332308	9872
(13000532,13009928)(13791379,13801379)(13791379,13801379)	NC_044998.1	13796379	22.0886	28.3366	12.6485	26.5863	27.4614	1.13451	1.22303	0.92109	0.075528	0.249724	9396
(13009929,13019774)(13801380,13811380)(13801380,13811380)	NC_044998.1	13806380	35.9548	45.1623	19.9477	46.7376	45.95	1.03806	1.23722	0.986907	-0.041956	0.287821	9845
(13019775,13029263)(13811381,13821381)(13811381,13821381)	NC_044998.1	13816381	27.325	33.4755	9.41318	47.2873	40.3814	0.907531	1.53453	1.4324	-0.482907	0.492607	9488
(13029264,13039120)(13821382,13831382)(13821382,13831382)	NC_044998.1	13826382	19.9012	21.6488	14.1637	25.012	23.3304	0.351166	0.643359	0.616567	-0.160871	0.176483	9856
(13039121,13048988)(13831383,13841383)(13831383,13841383)	NC_044998.1	13836383	21.0168	25.4187	4.44288	27.5689	26.4938	0.83889	1.71331	1.69351	-0.097462	0.26725	9867
(13048989,13058900)(13841384,13851384)(13841384,13851384)	NC_044998.1	13846384	26.6403	30.2091	10.0061	34.9004	32.5547	0.539816	1.31981	1.36236	-0.168194	0.228777	9911
(13058901,13068484)(13851385,13861385)(13851385,13861385)	NC_044998.1	13856385	31.9266	35.8508	10.529	49.7219	42.7864	0.497168	1.39232	1.47714	-0.415658	0.351572	9583
(13068485,13078445)(13861386,13871386)(13861386,13871386)	NC_044998.1	13866386	29.2979	30.5883	20.7222	47.8585	39.2234	0.177846	0.588835	0.642165	-0.56353	0.34968	9960
(13078446,13088404)(13871387,13881387)(13871387,13881387)	NC_044998.1	13876387	15.3216	12.4699	13.4081	18.8919	15.6809	-0.737695	-0.1027	0.261103	-0.397443	0.023851	9958
(13088405,13098360)(13881388,13891388)(13881388,13891388)	NC_044998.1	13886388	21.4601	21.1698	14.4599	42.0704	31.6201	-0.054209	0.537454	0.70157	-0.928014	0.485746	9955
(13098361,13108227)(13891389,13901389)(13891389,13901389)	NC_044998.1	13896389	25.1392	24.295	18.7288	42.0551	33.175	-0.135129	0.384146	0.554369	-0.674375	0.329042	9866
(13108228,13117627)(13901390,13911390)(13901390,13911390)	NC_044998.1	13906390	34.1088	31.1706	22.3716	50.9198	41.0452	-0.348859	0.454144	0.76092	-0.554231	0.210395	9399
(13117628,13127501)(13911391,13921391)(13911391,13921391)	NC_044998.1	13916391	33.6257	28.7091	24.5861	54.5261	41.6176	-0.591991	0.215728	0.594039	-0.734843	0.245844	9873
(13127502,13137229)(13921392,13931392)(13921392,13931392)	NC_044998.1	13926392	30.3094	26.8728	26.8405	34.0201	30.4465	-0.458149	0.00187	0.251559	-0.225503	0.004671	9727
(13137230,13146106)(13931393,13941393)(13931393,13941393)	NC_044998.1	13936393	29.525	27.553	23.6136	58.3876	42.9703	-0.26974	0.233396	0.439448	-0.998463	0.470097	8876
(13146107,13155165)(13941394,13951394)(13941394,13951394)	NC_044998.1	13946394	26.4421	26.3596	15.1959	57.2932	41.8264	-0.012576	0.734476	0.927563	-1.11729	0.599459	9058
(13155166,13164822)(13951395,13961395)(13951395,13961395)	NC_044998.1	13956395	23.8632	24.6044	13.1134	35.5761	30.0902	0.124831	0.833017	0.976048	-0.438643	0.268336	9656
(13164823,13174413)(13961396,13971396)(13961396,13971396)	NC_044998.1	13966396	30.7676	28.9765	16.462	55.375	42.1758	-0.235291	0.712853	1.02278	-0.820593	0.383019	9590
(13174414,13184157)(13971397,13981397)(13971397,13981397)	NC_044998.1	13976397	30.996	33.1089	12.5308	71.892	52.5005	0.275579	1.16393	1.31096	-1.19676	0.716757	9743
(13184158,13193954)(13981398,13991398)(13981398,13991398)	NC_044998.1	13986398	22.1828	21.1823	14.896	46.416	33.7992	-0.180904	0.488129	0.708186	-1.08434	0.537674	9796
(13193955,13203841)(13991399,14001399)(13991399,14001399)	NC_044998.1	13996399	23.0347	22.7633	14.0473	44.3316	33.5475	-0.047305	0.653235	0.84337	-0.892948	0.468971	9886
(13203842,13213085)(14001400,14011400)(14001400,14011400)	NC_044998.1	14006400	38.5637	36.7921	31.2595	79.0027	57.8974	-0.186429	0.253788	0.421188	-1.04867	0.519544	9243
(13213086,13222023)(14011401,14021401)(14011401,14021401)	NC_044998.1	14016401	26.1418	24.7406	18.6999	45.8011	35.2708	-0.215889	0.401753	0.62041	-0.769333	0.359731	8937
(13222024,13231190)(14021402,14031402)(14021402,14031402)	NC_044998.1	14026402	34.9114	34.6989	22.6005	72.491	53.5949	-0.024657	0.610663	0.780631	-1.03638	0.553865	9166
(13231191,13241063)(14031403,14041403)(14031403,14041403)	NC_044998.1	14036403	28.7622	29.4339	21.2407	49.5627	39.4983	0.094264	0.497664	0.57313	-0.668923	0.385162	9872
(13241064,13251021)(14041404,14051404)(14041404,14051404)	NC_044998.1	14046404	34.5478	30.5392	27.3883	68.0597	49.2995	-0.470001	0.160646	0.458529	-1.03968	0.441843	9957
(13251022,13260922)(14051405,14061405)(14051405,14061405)	NC_044998.1	14056405	38.4404	32.3692	29.4908	67.0103	49.6897	-0.640924	0.132442	0.517654	-0.863361	0.303253	9900
(13260923,13270685)(14061406,14071406)(14061406,14071406)	NC_044998.1	14066406	28.6077	25.3362	20.9113	62.6641	44.0001	-0.461542	0.270153	0.589446	-1.24713	0.555142	9762
(13270686,13280589)(14071407,14081407)(14071407,14081407)	NC_044998.1	14076407	33.7752	27.4866	27.1069	75.5179	51.5022	-0.753898	0.019784	0.436366	-1.36113	0.542931	9903
(13280590,13290506)(14081408,14091408)(14081408,14091408)	NC_044998.1	14086408	29.9406	24.9669	23.9342	58.2058	41.5864	-0.671075	0.060373	0.440644	-1.06151	0.401619	9916
(13290507,13300399)(14091409,14101409)(14091409,14101409)	NC_044998.1	14096409	35.7013	32.0435	28.4773	67.5007	49.7721	-0.415255	0.17618	0.448408	-0.950998	0.40802	9892
(13300400,13310291)(14101410,14111410)(14101410,14111410)	NC_044998.1	14106410	34.4433	35.0666	20.5823	52.3676	43.7171	0.073303	0.740619	0.890297	-0.480848	0.278602	9891
(13310292,13320158)(14111411,14121411)(14111411,14121411)	NC_044998.1	14116411	43.4474	48.4172	23.5293	61.8193	55.1182	0.465036	1.01755	1.02444	-0.295764	0.278768	9866
(13320159,13329728)(14121412,14131412)(14121412,14131412)	NC_044998.1	14126412	30.6812	30.2647	24.975	40.3192	35.292	-0.054857	0.302124	0.409051	-0.313415	0.155233	9569
(13329729,13339410)(14131413,14141413)(14131413,14141413)	NC_044998.1	14136413	37.6845	42.2296	19.9979	60.1868	51.2082	0.489276	1.04268	1.04261	-0.456461	0.371783	9681
(13339411,13349306)(14141414,14151414)(14141414,14151414)	NC_044998.1	14146414	26.3187	29.4932	13.4324	33.1557	31.3245	0.485905	1.06135	1.06751	-0.132902	0.195952	9895
(13349307,13359097)(14151415,14161415)(14151415,14161415)	NC_044998.1	14156415	33.1336	34.9954	16.8354	48.322	41.6587	0.227435	0.963699	1.08616	-0.38491	0.266081	9790
(13359098,13369039)(14161416,14171416)(14161416,14171416)	NC_044998.1	14166416	40.7298	44.0721	21.2233	55.517	49.7945	0.333294	0.994316	1.06746	-0.269313	0.230791	9941
(13369040,13378965)(14171417,14181417)(14171417,14181417)	NC_044998.1	14176417	36.2586	41.7896	16.6917	67.9954	54.8925	0.618423	1.22158	1.19674	-0.692141	0.532142	9925
(13378966,13388892)(14181418,14191418)(14181418,14191418)	NC_044998.1	14186418	34.282	34.0078	28.4693	52.9331	43.4704	-0.032402	0.284472	0.375024	-0.528448	0.277315	9926
(13388893,13398800)(14191419,14201419)(14191419,14201419)	NC_044998.1	14196419	35.1189	40.9891	19.0652	53.4471	47.2181	0.677292	1.10033	1.01223	-0.339633	0.356586	9907
(13398801,13408481)(14201420,14211420)(14201420,14211420)	NC_044998.1	14206420	34.882	31.2924	35.7319	68.1369	49.7147	-0.416923	-0.224263	-0.053932	-1.01124	0.440071	9680
(13408482,13418292)(14211421,14221421)(14211421,14221421)	NC_044998.1	14216421	32.1862	24.6378	33.9237	61.1453	42.8916	-0.948749	-0.506644	-0.119025	-1.08522	0.34382	9810
(13418293,13427177)(14221422,14231422)(14221422,14231422)	NC_044998.1	14226422	26.3883	20.2468	33.7469	46.2855	33.2662	-0.93763	-0.889906	-0.60808	-0.94239	0.268536	8884
(13427178,13437089)(14231423,14241423)(14231423,14241423)	NC_044998.1	14236423	37.9589	28.6152	48.2384	77.0188	52.817	-0.998692	-0.913944	-0.60179	-1.22156	0.405554	9911
(13437090,13446374)(14241424,14251424)(14241424,14251424)	NC_044998.1	14246424	42.7034	44.5183	28.682	76.1507	60.3345	0.172743	0.658377	0.733231	-0.710162	0.428387	9284
(13446375,13456174)(14251425,14261425)(14251425,14261425)	NC_044998.1	14256425	44.1589	49.2431	36.9191	60.0302	54.6367	0.468191	0.496022	0.366594	-0.234242	0.246284	9799
(13456175,13466074)(14261426,14271426)(14261426,14271426)	NC_044998.1	14266426	28.4991	30.8852	23.5689	34.0993	32.4923	0.337889	0.448305	0.378947	-0.107786	0.144557	9899
(13466075,13475953)(14271427,14281427)(14271427,14281427)	NC_044998.1	14276427	30.3674	29.5564	35.708	54.1806	41.8685	-0.107926	-0.354813	-0.386585	-0.775438	0.391143	9878
(13475954,13485842)(14281428,14291428)(14281428,14291428)	NC_044998.1	14286428	32.5024	35.724	33.0885	47.1833	41.4537	0.401051	0.142459	-0.039774	-0.337353	0.284727	9888
(13485843,13495631)(14291429,14301429)(14291429,14301429)	NC_044998.1	14296429	35.5438	36.8656	26.8944	45.2767	41.0711	0.150716	0.494693	0.539149	-0.226587	0.160981	9788
(13495632,13505507)(14301430,14311430)(14301430,14311430)	NC_044998.1	14306430	35.8782	41.0469	23.4232	47.7388	44.3929	0.58394	0.866529	0.769472	-0.178606	0.245703	9875
(13505508,13515120)(14311431,14321431)(14311431,14321431)	NC_044998.1	14316431	36.6139	42.5367	25.8805	40.0115	41.2741	0.655921	0.803142	0.65039	0.066053	0.131811	9612
(13515121,13524915)(14321432,14331432)(14321432,14331432)	NC_044998.1	14326432	36.3875	38.7429	38.1447	43.514	41.1285	0.262446	0.029018	-0.10711	-0.125571	0.134919	9794
(13524916,13534888)(14331433,14341433)(14331433,14341433)	NC_044998.1	14336433	23.8688	23.5914	31.4864	23.935	23.7632	-0.046712	-0.572203	-0.691497	-0.013733	-0.004551	9972
(13534889,13544793)(14341434,14351434)(14341434,14351434)	NC_044998.1	14346434	45.1442	42.8189	50.9803	64.6838	53.7513	-0.209523	-0.321543	-0.289306	-0.464494	0.197945	9904
(13544794,13554729)(14351435,14361435)(14351435,14361435)	NC_044998.1	14356435	46.5609	49.1125	46.1913	65.8646	57.4885	0.223006	0.111696	0.017786	-0.345112	0.243746	9935
(13554730,13564646)(14361436,14371436)(14361436,14371436)	NC_044998.1	14366436	49.4329	54.2445	35.0917	69.3976	61.821	0.396401	0.691035	0.651365	-0.294131	0.260428	9916
(13564647,13574490)(14371437,14381437)(14371437,14381437)	NC_044998.1	14376437	46.563	52.5325	28.3449	58.6608	55.5966	0.521708	0.924807	0.876591	-0.126244	0.201491	9843
(13574491,13584375)(14381438,14391438)(14381438,14391438)	NC_044998.1	14386438	44.5481	46.4878	39.468	55.0681	50.778	0.177085	0.280145	0.25507	-0.184703	0.14517	9884
(13584376,13594066)(14391439,14401439)(14391439,14401439)	NC_044998.1	14396439	40.9315	44.9597	29.4962	45.986	45.4729	0.399747	0.669727	0.622816	-0.024034	0.115062	9690
(13594067,13603999)(14401440,14411440)(14401440,14411440)	NC_044998.1	14406440	39.9829	41.664	29.917	53.4259	47.545	0.170724	0.520405	0.560699	-0.28191	0.196086	9932
(13604000,13613912)(14411441,14421441)(14411441,14421441)	NC_044998.1	14416441	41.4045	38.7723	41.9217	47.2486	43.0105	-0.258272	-0.134898	-0.027863	-0.196228	0.04023	9912
(13613913,13622931)(14421442,14431525)(14421442,14431442)	NC_044998.1	14426442	48.092	46.332	49.1207	82.3647	64.3484	-0.148983	-0.103338	-0.047983	-0.718813	0.35118	9018
(13622931,13632741)(14431525,14441443)(14431443,14441443)	NC_044998.1	14436443	50.3299	57.3209	33.4036	75.1369	66.2289	0.565819	0.848002	0.755535	-0.339689	0.328337	9810
(13632742,13642671)(14441444,14451444)(14441444,14451444)	NC_044998.1	14446444	43.3882	45.1312	33.7713	64.639	54.8851	0.163314	0.465066	0.495273	-0.43109	0.274983	9929
(13642672,13651913)(14451445,14461445)(14451445,14461445)	NC_044998.1	14456445	44.2345	37.0736	58.8727	44.5103	40.792	-0.658309	-0.875924	-0.74	-0.161214	-0.08078	9241
(13651914,13661868)(14461446,14471446)(14461446,14471446)	NC_044998.1	14466446	45.5954	47.8205	39.0144	69.2638	58.5422	0.198533	0.343616	0.323124	-0.451055	0.294832	9954
(13661869,13671742)(14471447,14481447)(14471447,14481447)	NC_044998.1	14476447	33.6727	31.1817	33.0899	42.4776	36.8296	-0.299525	-0.099713	0.038246	-0.321075	0.096978	9873
(13671743,13680990)(14481448,14491448)(14481448,14491448)	NC_044998.1	14486448	37.6648	34.3936	48.1723	36.4194	35.4065	-0.352323	-0.646553	-0.619719	-0.051522	-0.062115	9247
(13680991,13690831)(14491449,14501449)(14491449,14501449)	NC_044998.1	14496449	40.9436	43.7729	38.569	59.1741	51.4735	0.280694	0.225319	0.129294	-0.36053	0.266713	9840
(13690832,13700623)(14501450,14511450)(14501450,14511450)	NC_044998.1	14506450	40.208	43.193	39.3788	65.3363	54.2646	0.301465	0.16806	0.045945	-0.527776	0.362474	9791
(13700624,13710475)(14511451,14521451)(14511451,14521451)	NC_044998.1	14516451	42.5775	50.0495	30.5708	70.3476	60.1986	0.713253	0.812117	0.629659	-0.457041	0.429393	9851
(13710476,13720033)(14521452,14531452)(14521452,14531452)	NC_044998.1	14526452	28.7959	32.1828	17.0486	37.3434	34.7631	0.47475	0.918235	0.894138	-0.171299	0.213828	9557
(13720034,13729929)(14531453,14541453)(14531453,14541453)	NC_044998.1	14536453	12.8676	13.4602	10.0197	16.4198	14.94	0.181211	0.441441	0.454447	-0.217392	0.162833	9895
(13729930,13739827)(14541454,14551454)(14541454,14551454)	NC_044998.1	14546454	26.5653	32.5847	14.698	29.2017	30.8932	0.913016	1.17162	0.974522	0.121633	0.167874	9897
(13739828,13749691)(14551455,14561455)(14551455,14561455)	NC_044998.1	14556455	26.4254	28.2674	14.1015	41.214	34.7407	0.280844	0.932552	1.01704	-0.467911	0.324216	9863
(13749692,13759651)(14561456,14571456)(14561456,14571456)	NC_044998.1	14566456	24.135	25.9962	11.6283	37.0339	31.515	0.310002	1.03051	1.12363	-0.436365	0.314507	9959
(13759652,13769494)(14571457,14581457)(14571457,14581457)	NC_044998.1	14576457	30.571	38.0856	16.2152	37.9353	38.0104	0.993412	1.25342	1.03262	0.004704	0.251351	9842
(13769495,13779207)(14581458,14591458)(14581458,14591458)	NC_044998.1	14586458	29.4624	31.3674	19.9418	42.0185	36.693	0.26111	0.678287	0.709168	-0.345623	0.253334	9712
(13779208,13789037)(14591459,14601459)(14591459,14601459)	NC_044998.1	14596459	32.3552	32.031	28.0178	27.8582	29.9446	-0.040538	0.217869	0.295655	0.123397	-0.077021	9829
(13789038,13798823)(14601460,14611460)(14601460,14611460)	NC_044998.1	14606460	23.9763	25.1789	19.2736	31.4761	28.3275	0.201604	0.426187	0.425108	-0.250582	0.186633	9785
(13798824,13808577)(14611461,14621461)(14611461,14621461)	NC_044998.1	14616461	23.9464	20.0907	27.3061	35.4215	27.7561	-0.647165	-0.521351	-0.304058	-0.610806	0.163607	9753
(13808578,13818497)(14621462,14631462)(14621462,14631462)	NC_044998.1	14626462	28.3933	31.129	22.2046	40.8192	35.9741	0.388798	0.548773	0.477348	-0.326172	0.275438	9919
(13818498,13828232)(14631463,14641463)(14631463,14641463)	NC_044998.1	14636463	25.4622	26.1157	21.1262	25.2456	25.6807	0.103314	0.340219	0.370525	0.032626	0.008833	9734
(13828233,13838086)(14641464,14651464)(14641464,14651464)	NC_044998.1	14646464	26.4758	27.0523	13.7702	36.8198	31.936	0.087732	0.87279	1.04667	-0.352348	0.212498	9853
(13838087,13847781)(14651465,14661465)(14651465,14661465)	NC_044998.1	14656465	24.3357	26.2879	10.7312	32.5288	29.4083	0.322564	1.10709	1.21283	-0.244714	0.214431	9694
(13847782,13857401)(14661466,14671466)(14661466,14671466)	NC_044998.1	14666466	14.2407	15.1701	11.9191	15.3089	15.2395	0.25792	0.380469	0.338367	-0.009235	0.071161	9619
(13857402,13867274)(14671467,14681467)(14671467,14681467)	NC_044998.1	14676467	25.6023	32.4675	14.0803	30.3173	31.3924	1.07952	1.24726	0.979535	0.080183	0.232875	9872
(13867275,13877174)(14681468,14691468)(14681468,14691468)	NC_044998.1	14686468	38.3677	46.1841	25.485	51.9203	49.0522	0.826682	0.954154	0.746493	-0.143234	0.288566	9899
(13877175,13886971)(14691469,14701469)(14691469,14701469)	NC_044998.1	14696469	23.2868	26.4311	14.3772	28.9327	27.6819	0.542328	0.894195	0.827636	-0.102457	0.193984	9796
(13886972,13896610)(14701470,14711470)(14701470,14711470)	NC_044998.1	14706470	22.7842	28.2329	5.99544	46.3892	37.311	0.959969	1.68385	1.59156	-0.759854	0.655011	9638
(13896611,13906479)(14711471,14721471)(14711471,14721471)	NC_044998.1	14716471	36.1935	44.5189	18.3626	56.9187	50.7188	0.932517	1.2753	1.09244	-0.328086	0.415547	9868
(13906480,13916400)(14721472,14731472)(14721472,14731472)	NC_044998.1	14726472	32.9857	44.2367	8.80617	54.1963	49.2165	1.38049	1.88827	1.61826	-0.28894	0.508827	9920
(13916401,13925999)(14731473,14741473)(14731473,14741473)	NC_044998.1	14736473	45.1357	52.334	26.1435	67.2894	59.8117	0.64872	1.03204	0.941653	-0.317768	0.337579	9598
(13926000,13935933)(14741474,14751474)(14741474,14751474)	NC_044998.1	14746474	30.7948	36.1702	8.43057	49.2557	42.713	0.705559	1.57877	1.5976	-0.406405	0.399794	9933
(13935934,13945666)(14751475,14761475)(14751475,14761475)	NC_044998.1	14756475	28.8047	33.2758	13.5308	41.4453	37.3606	0.626548	1.19764	1.16223	-0.271095	0.3065	9732
(13945667,13955626)(14761476,14771476)(14761476,14771476)	NC_044998.1	14766476	29.3519	31.7795	19.2819	31.2559	31.5177	0.333979	0.744588	0.752755	0.017054	0.076164	9959
(13955627,13965146)(14771477,14781477)(14771477,14781477)	NC_044998.1	14776477	54.5451	64.3513	21.7268	68.7849	66.5681	0.733031	1.39761	1.35525	-0.078033	0.229278	9519
(13965147,13975034)(14781478,14791478)(14781478,14791478)	NC_044998.1	14786478	35.4451	47.6578	7.16747	47.5384	47.5981	1.39631	2.01419	1.76734	0.003225	0.354918	9887
(13975035,13984951)(14791479,14801479)(14791479,14801479)	NC_044998.1	14796479	33.4461	38.1381	15.3388	31.8013	34.9697	0.56793	1.19908	1.19601	0.18133	0.047116	9916
(13984952,13994745)(14801480,14811480)(14801480,14811480)	NC_044998.1	14806480	35.4348	40.9534	16.7905	43.2696	42.1115	0.631146	1.20232	1.16559	-0.062585	0.195045	9793
(13994746,14004621)(14811481,14821481)(14811481,14821481)	NC_044998.1	14816481	33.2272	36.0262	24.2171	35.4475	35.7369	0.340998	0.624989	0.598847	0.016668	0.078116	9875
(14004622,14014261)(14821482,14831482)(14821482,14831482)	NC_044998.1	14826482	41.6062	44.0767	20.7819	63.0123	53.5445	0.241253	0.993111	1.11654	-0.436251	0.297627	9639
(14014262,14024044)(14831483,14841483)(14831483,14841483)	NC_044998.1	14836483	31.3644	31.6794	22.3141	58.0884	44.8839	0.040619	0.523773	0.635382	-0.805429	0.445402	9782
(14024045,14033896)(14841484,14851484)(14841484,14851484)	NC_044998.1	14846484	37.4931	42.2125	21.1592	45.026	43.6193	0.510596	0.992262	0.967569	-0.07188	0.169265	9851
(14033897,14043728)(14851485,14861485)(14851485,14861485)	NC_044998.1	14856485	42.1848	43.431	17.6848	76.9597	60.1953	0.120044	1.08308	1.29632	-0.761931	0.442922	9831
(14043729,14053587)(14861486,14871486)(14861486,14871486)	NC_044998.1	14866486	41.6222	46.1564	10.2976	51.15	48.6532	0.442607	1.52817	1.67891	-0.115001	0.175218	9858
(14053588,14063440)(14871487,14881487)(14871487,14881487)	NC_044998.1	14876487	40.2291	52.3558	5.46921	46.7352	49.5455	1.22412	2.06486	1.92486	0.133894	0.240114	9852
(14063441,14073287)(14881488,14891488)(14881488,14891488)	NC_044998.1	14886488	31.6294	40.0103	3.71229	44.8293	42.4198	1.07158	2.01377	1.94437	-0.14575	0.352558	9846
(14073288,14083179)(14891489,14901489)(14891489,14901489)	NC_044998.1	14896489	33.8282	41.9773	11.5497	37.3246	39.6509	0.975436	1.58294	1.4557	0.131644	0.17806	9891
(14083180,14093110)(14901490,14911490)(14901490,14911490)	NC_044998.1	14906490	33.1745	39.3778	10.9608	43.2315	41.3047	0.756887	1.50624	1.47865	-0.111172	0.253448	9930
(14093111,14102802)(14911491,14921491)(14911491,14921491)	NC_044998.1	14916491	36.474	45.9427	13.9671	55.5507	50.7467	1.05255	1.5475	1.3688	-0.252278	0.405221	9691
(14102803,14112661)(14921492,14931492)(14921492,14931492)	NC_044998.1	14926492	32.9817	38.5416	15.7348	49.1671	43.8544	0.682276	1.21564	1.15442	-0.308296	0.340893	9858
(14112662,14122550)(14931493,14941493)(14931493,14941493)	NC_044998.1	14936493	38.8612	46.8935	15.7113	65.0894	55.9914	0.838899	1.41981	1.32513	-0.44862	0.45685	9888
(14122551,14132466)(14941494,14951494)(14941494,14951494)	NC_044998.1	14946494	31.1443	39.1445	6.44594	46.9919	43.0682	1.03851	1.84106	1.74558	-0.241012	0.395565	9915
(14132467,14142168)(14951495,14961495)(14951495,14961495)	NC_044998.1	14956495	38.1991	44.4885	15.4054	64.4258	54.4571	0.66807	1.34633	1.32637	-0.500016	0.441009	9701
(14142169,14151979)(14961496,14971496)(14961496,14971496)	NC_044998.1	14966496	33.9067	42.736	7.33856	48.2958	45.5159	1.05446	1.83741	1.73217	-0.15695	0.354201	9810
(14151980,14161025)(14971497,14981497)(14971497,14981497)	NC_044998.1	14976497	32.7203	39.4389	3.35236	53.7717	46.6053	0.830928	1.93816	1.98064	-0.41916	0.438767	9045
(14161026,14170786)(14981498,14991498)(14981498,14991498)	NC_044998.1	14986498	28.6595	36.3194	1.98333	37.4748	36.8971	1.07872	2.09271	2.03956	-0.038533	0.296567	9760
(14170787,14180639)(14991499,15001499)(14991499,15001499)	NC_044998.1	14996499	37.097	47.5709	4.62703	59.9583	53.7646	1.14507	2.04477	1.94304	-0.319832	0.465373	9852
(14180640,14190554)(15001500,15011500)(15001500,15011500)	NC_044998.1	15006500	28.2592	36.1992	2.18715	37.1082	36.6537	1.13368	2.10088	2.01999	-0.030742	0.306428	9914
(14190555,14200472)(15011501,15021501)(15011501,15021501)	NC_044998.1	15016501	32.4874	42.9897	3.95338	35.8321	39.4109	1.30801	2.11097	1.9375	0.210809	0.220327	9917
(14200473,14210287)(15021502,15031502)(15021502,15031502)	NC_044998.1	15026502	43.0047	52.5476	2.96146	64.555	58.5513	0.902018	2.04752	2.07991	-0.267695	0.375122	9814
(14210288,14220254)(15031503,15041503)(15031503,15041503)	NC_044998.1	15036503	35.9699	48.3415	1.54192	51.6825	50.012	1.3942	2.29542	2.12179	-0.088943	0.404188	9966
(14220255,14229415)(15041504,15051504)(15041504,15051504)	NC_044998.1	15046504	39.2575	44.6921	6.55754	57.1581	50.9251	0.561962	1.71948	1.8537	-0.304267	0.308065	9160
(14229416,14239269)(15051505,15061505)(15051505,15061505)	NC_044998.1	15056505	37.0195	40.459	26.0617	41.6499	41.0545	0.376797	0.686905	0.657041	-0.030813	0.112891	9853
(14239270,14249198)(15061506,15071506)(15061506,15071506)	NC_044998.1	15066506	45.5876	58.8538	13.158	72.0485	65.4511	1.18387	1.78336	1.59254	-0.277595	0.452422	9928
(14249199,14258669)(15071507,15081507)(15071507,15081507)	NC_044998.1	15076507	43.1322	51.4663	13.975	78.6237	65.045	0.785461	1.54368	1.51017	-0.603671	0.527185	9470
(14258670,14268570)(15081508,15091508)(15081508,15091508)	NC_044998.1	15086508	25.4441	31.9049	5.51445	35.6769	33.7909	1.0221	1.80068	1.70417	-0.141527	0.337752	9900
(14268571,14278489)(15091509,15101509)(15091509,15101509)	NC_044998.1	15096509	31.4516	34.7466	12.5901	50.8676	42.8071	0.423636	1.23586	1.32071	-0.490309	0.373086	9918
(14278490,14288292)(15101510,15111510)(15101510,15111510)	NC_044998.1	15106510	30.3833	27.6087	17.7644	51.9903	39.7995	-0.369023	0.567512	0.912988	-0.767402	0.320074	9802
(14288293,14297717)(15111511,15121511)(15111511,15121511)	NC_044998.1	15116511	45.2822	54.8937	12.6722	79.4015	67.1476	0.863441	1.65853	1.6118	-0.519062	0.501342	9424
(14297718,14307602)(15121512,15131512)(15121512,15131512)	NC_044998.1	15126512	41.9316	42.1817	33.9219	54.9455	48.5636	0.024238	0.349494	0.426254	-0.291796	0.164072	9884
(14307603,14317532)(15131513,15141513)(15131513,15141513)	NC_044998.1	15136513	33.2616	37.3479	14.9992	51.0194	44.1837	0.497308	1.18162	1.21261	-0.393364	0.339604	9929
(14317533,14327247)(15141514,15151514)(15141514,15151514)	NC_044998.1	15146514	44.676	49.1762	11.9968	56.1436	52.6599	0.409682	1.47965	1.63631	-0.149556	0.185517	9714
(14327248,14337153)(15151515,15161515)(15151515,15161515)	NC_044998.1	15156515	42.5145	50.93	9.32999	45.3266	48.1283	0.804489	1.73689	1.74274	0.126354	0.136998	9905
(14337154,14347076)(15161516,15171516)(15161516,15171516)	NC_044998.1	15166516	44.8373	53.1816	4.48999	59.2274	56.2045	0.756928	1.93105	2.01327	-0.129309	0.263189	9922
(14347077,14356976)(15171517,15181517)(15171517,15181517)	NC_044998.1	15176517	49.6578	62.2779	8.72624	68.6424	65.4601	1.03506	1.92365	1.85094	-0.122981	0.330714	9899
(14356977,14366771)(15181518,15191518)(15181518,15191518)	NC_044998.1	15186518	33.048	38.4124	5.0414	55.9479	47.1801	0.656986	1.7753	1.87104	-0.507776	0.442212	9794
(14366772,14376697)(15191519,15201519)(15191519,15201519)	NC_044998.1	15196519	31.2687	36.0351	9.22196	34.8436	35.4393	0.616333	1.50395	1.55229	0.036451	0.137817	9925
(14376698,14386504)(15201520,15211520)(15201520,15211520)	NC_044998.1	15206520	37.3652	42.3443	15.3103	43.9565	43.1504	0.540499	1.27833	1.31074	-0.041329	0.160383	9806
(14386505,14395938)(15211521,15221521)(15211521,15221521)	NC_044998.1	15216521	35.4929	38.3519	16.3677	42.395	40.3735	0.326448	1.09219	1.19378	-0.109073	0.142345	9433
(14395939,14404704)(15221522,15231522)(15221522,15231522)	NC_044998.1	15226522	40.5673	45.8622	18.4667	58.0987	51.9804	0.530104	1.19678	1.21406	-0.289087	0.291735	8765
(14404705,14414572)(15231523,15241523)(15231523,15241523)	NC_044998.1	15236523	46.1938	51.4225	11.9848	54.8798	53.1511	0.460564	1.51956	1.65869	-0.071787	0.156406	9867
(14414573,14423936)(15241524,15251524)(15241524,15251524)	NC_044998.1	15246524	46.5177	50.221	30.1756	55.714	52.9675	0.323965	0.767153	0.78706	-0.113266	0.143999	9363
(14423937,14433737)(15251525,15261525)(15251525,15261525)	NC_044998.1	15256525	37.635	42.3035	27.5736	45.617	43.9602	0.503211	0.691715	0.593859	-0.084339	0.174115	9800
(14433738,14443594)(15261526,15271526)(15261526,15271526)	NC_044998.1	15266526	53.2513	62.9615	32.6792	75.6345	69.298	0.743276	1.01639	0.869517	-0.228441	0.313374	9856
(14443595,14453346)(15271527,15281527)(15271527,15281527)	NC_044998.1	15276527	52.7413	60.7018	26.1168	78.6539	69.6779	0.615166	1.17172	1.13586	-0.326713	0.333919	9751
(14453347,14462770)(15281528,15291528)(15281528,15291528)	NC_044998.1	15286528	46.0377	49.8113	27.4321	75.9497	62.8805	0.333508	0.865117	0.905072	-0.544565	0.37991	9423
(14462771,14472726)(15291529,15301529)(15291529,15301529)	NC_044998.1	15296529	42.0169	44.2973	27.5215	69.2952	56.7962	0.22054	0.708438	0.769906	-0.570326	0.364895	9955
(14472727,14482520)(15301530,15311530)(15301530,15311530)	NC_044998.1	15306530	41.729	44.916	24.0364	54.1972	49.5566	0.310321	0.887617	0.945944	-0.213202	0.194579	9793
(14482521,14492389)(15311531,15321531)(15311531,15321531)	NC_044998.1	15316531	39.3758	39.6056	23.8415	66.4333	53.0194	0.023685	0.708741	0.878075	-0.652849	0.359168	9868
(14492390,14502238)(15321532,15331605)(15321532,15331532)	NC_044998.1	15326532	48.2409	53.4599	24.6928	80.3049	66.8824	0.440447	1.06279	1.09503	-0.533885	0.401472	9848
(14502238,14511975)(15331605,15341533)(15331533,15341533)	NC_044998.1	15336533	44.1907	54.6139	21.0084	56.6941	55.654	0.959151	1.35162	1.17304	-0.04514	0.269255	9737
(14511976,14521637)(15341534,15351534)(15341534,15351534)	NC_044998.1	15346534	43.8624	48.4977	27.6526	60.256	54.3768	0.429692	0.844462	0.82613	-0.257046	0.248796	9661
(14521638,14531523)(15351535,15361535)(15351535,15361535)	NC_044998.1	15356535	43.4199	46.0305	25.6394	65.1622	55.5964	0.244441	0.834213	0.915058	-0.422473	0.291029	9885
(14531524,14541317)(15361536,15371536)(15361536,15371536)	NC_044998.1	15366536	57.3927	63.2049	28.8123	86.2835	74.7442	0.413143	1.07317	1.12344	-0.38613	0.314613	9793
(14541318,14551196)(15371537,15381537)(15371537,15381537)	NC_044998.1	15376537	60.4303	62.7806	41.9624	113.249	88.0148	0.158759	0.617741	0.690482	-0.802134	0.475221	9878
(14551197,14560808)(15381538,15391538)(15381538,15391538)	NC_044998.1	15386538	34.8643	44.313	15.1348	47.4679	45.8905	1.09798	1.47467	1.25265	-0.086633	0.3273	9611
(14560809,14570221)(15391539,15401539)(15391539,15401539)	NC_044998.1	15396539	42.9411	42.5339	24.6982	63.2835	52.9087	-0.03855	0.737528	0.948912	-0.463276	0.240859	9412
(14570222,14580013)(15401540,15411540)(15401540,15411540)	NC_044998.1	15406540	48.2497	54.2835	30.3766	55.1194	54.7015	0.509127	0.883078	0.830983	-0.016622	0.138924	9791
(14580014,14589871)(15411541,15421541)(15411541,15421541)	NC_044998.1	15416541	45.4878	48.2417	32.8985	72.8967	60.5692	0.24629	0.600068	0.619537	-0.519834	0.344249	9857
(14589872,14599686)(15421542,15431542)(15421542,15431542)	NC_044998.1	15426542	49.6713	57.0512	18.8821	89.5172	73.2842	0.605111	1.37073	1.39193	-0.62718	0.494042	9814
(14599687,14609023)(15431543,15441543)(15431543,15441543)	NC_044998.1	15436543	42.5595	50.4956	13.2266	51.1275	50.8116	0.75788	1.55448	1.5389	-0.014234	0.201173	9336
(14609024,14618662)(15441544,15451544)(15441544,15451544)	NC_044998.1	15446544	40.6967	50.9591	9.51018	58.8021	54.8806	1.02421	1.80516	1.70795	-0.184706	0.361418	9638
(14618663,14628478)(15451545,15461545)(15451545,15461545)	NC_044998.1	15456545	45.4091	49.0153	26.1796	45.0045	47.0099	0.323059	0.894593	0.94789	0.084711	0.036601	9815
(14628479,14638068)(15461546,15471546)(15461546,15471546)	NC_044998.1	15466546	46.6506	54.4893	10.9481	69.892	62.1906	0.683789	1.66175	1.71477	-0.316706	0.345967	9589
(14638069,14646923)(15471547,15481547)(15471547,15481547)	NC_044998.1	15476547	49.6202	58.4304	16.3884	72.2611	65.3457	0.723118	1.51132	1.50386	-0.267454	0.329351	8854
(14646924,14656480)(15481548,15491548)(15481548,15491548)	NC_044998.1	15486548	43.6691	51.2621	9.52209	74.3793	62.8207	0.706946	1.69818	1.74771	-0.507585	0.455156	9556
(14656481,14665611)(15491549,15501554)(15491549,15501549)	NC_044998.1	15496549	42.8575	46.0862	11.7124	71.8645	58.9753	0.306215	1.42408	1.62306	-0.576667	0.390226	9130
(14665611,14675348)(15501554,15511550)(15501550,15511550)	NC_044998.1	15506550	46.138	50.1229	18.3297	56.9581	53.5405	0.351427	1.22645	1.34991	-0.142098	0.166614	9737
(14675349,14685192)(15511551,15521551)(15511551,15521551)	NC_044998.1	15516551	42.1766	44.756	7.42507	53.647	49.2015	0.248526	1.57071	1.83908	-0.202086	0.172793	9843
(14685193,14695075)(15521552,15531552)(15521552,15531552)	NC_044998.1	15526552	47.2272	50.5759	34.6186	63.0808	56.8283	0.2886	0.601806	0.598455	-0.254002	0.211169	9882
(14695076,14704936)(15531553,15541553)(15531553,15541553)	NC_044998.1	15536553	51.1165	58.8156	39.0204	74.0603	66.438	0.613654	0.691359	0.531901	-0.286215	0.311588	9860
(14704937,14714401)(15541554,15551554)(15541554,15551554)	NC_044998.1	15546554	54.5288	57.1499	37.1371	69.679	63.4144	0.195988	0.656389	0.718409	-0.220581	0.169498	9464
(14714402,14724312)(15551555,15561555)(15551555,15561555)	NC_044998.1	15556555	39.3746	47.8095	23.775	41.1385	44.474	0.869648	1.08061	0.88179	0.162344	0.134246	9910
(14724313,14733478)(15561556,15571568)(15561556,15571556)	NC_044998.1	15566556	46.1743	52.5236	31.2282	59.4989	56.0112	0.559501	0.82086	0.724985	-0.144896	0.221234	9165
(14733478,14742858)(15571568,15581557)(15571557,15581557)	NC_044998.1	15576557	30.5466	36.817	16.3805	43.0868	39.9519	0.829576	1.17213	1.01974	-0.196292	0.318019	9380
(14742859,14752775)(15581558,15591558)(15581558,15591558)	NC_044998.1	15586558	39.8246	48.4858	22.4761	56.1972	52.3415	0.88304	1.15667	0.970036	-0.185557	0.32584	9916
(14752776,14762649)(15591559,15601559)(15591559,15601559)	NC_044998.1	15596559	35.4392	39.9718	20.859	49.7975	44.8846	0.518311	0.950916	0.911398	-0.26547	0.275893	9873
(14762650,14772459)(15601560,15611560)(15601560,15611560)	NC_044998.1	15606560	32.9297	38.8194	18.5278	52.8414	45.8304	0.723872	1.08321	0.965433	-0.407483	0.40511	9809
(14772460,14782277)(15611561,15621561)(15611561,15621561)	NC_044998.1	15616561	50.631	65.9582	19.426	77.9943	71.9763	1.23321	1.6403	1.38489	-0.22813	0.438213	9817
(14782278,14792132)(15621562,15631562)(15621562,15631562)	NC_044998.1	15626562	50.0738	61.9165	10.8811	80.4237	71.1701	0.963321	1.81848	1.75808	-0.354663	0.437873	9854
(14792133,14802063)(15631563,15641563)(15631563,15641563)	NC_044998.1	15636563	43.3558	51.0388	11.2988	58.887	54.9629	0.720419	1.6281	1.65213	-0.17356	0.277824	9930
(14802064,14811972)(15641564,15651564)(15641564,15651564)	NC_044998.1	15646564	34.6067	44.4194	10.1045	34.2775	39.3485	1.14862	1.74666	1.56671	0.280556	0.141787	9908
(14811973,14821584)(15651565,15661565)(15651565,15661565)	NC_044998.1	15656565	38.9571	46.1502	14.2961	53.7722	49.9612	0.749436	1.44697	1.4083	-0.187462	0.292758	9611
(14821585,14831256)(15661566,15671566)(15661566,15671566)	NC_044998.1	15666566	40.3569	47.376	24.6496	55.3433	51.3596	0.706331	0.997806	0.867166	-0.189201	0.282692	9671
(14831257,14841149)(15671567,15681567)(15671567,15681567)	NC_044998.1	15676567	42.3198	52.6928	23.6063	65.3385	59.0157	0.996128	1.21983	0.987112	-0.28646	0.4093	9892
(14841150,14850900)(15681568,15691568)(15681568,15691568)	NC_044998.1	15686568	43.2908	54.1716	28.0027	61.5498	57.8607	1.02178	1.07367	0.789044	-0.163411	0.349259	9750
(14850901,14860791)(15691569,15701569)(15691569,15701569)	NC_044998.1	15696569	41.7438	53.2238	20.4021	63.1803	58.202	1.11741	1.39481	1.14065	-0.228634	0.408974	9890
(14860792,14868785)(15701570,15711570)(15701570,15711570)	NC_044998.1	15706570	36.9273	42.8322	23.7945	48.9508	45.8915	0.648481	0.910487	0.789334	-0.158697	0.251424	7993
(14868786,14878523)(15711571,15721571)(15711571,15721571)	NC_044998.1	15716571	33.3636	41.045	14.8884	45.5592	43.3021	0.932023	1.3789	1.22317	-0.129492	0.30809	9737
(14878524,14888282)(15721572,15731572)(15721572,15731572)	NC_044998.1	15726572	33.7932	38.3329	22.1345	42.7998	40.5664	0.543949	0.843532	0.762548	-0.126517	0.207334	9758
(14888283,14897761)(15731573,15741573)(15731573,15741573)	NC_044998.1	15736573	31.7857	37.7301	20.1242	39.9405	38.8353	0.756383	0.972162	0.808408	-0.066528	0.229218	9478
(14897762,14907642)(15741574,15751574)(15741574,15751574)	NC_044998.1	15746574	35.6606	43.7782	18.8607	57.6858	50.732	0.9226	1.23233	1.04394	-0.373437	0.437525	9880
(14907643,14915426)(15751575,15761709)(15751575,15761575)	NC_044998.1	15756575	44.559	56.6498	19.6369	72.9894	64.8196	1.10354	1.47676	1.25105	-0.351647	0.472002	7783
(14915426,14924136)(15761709,15771576)(15761576,15771576)	NC_044998.1	15766576	41.6382	55.0439	13.3938	66.2622	60.653	1.30811	1.77432	1.51326	-0.258258	0.473687	8710
(14924137,14933917)(15771577,15781577)(15771577,15781577)	NC_044998.1	15776577	36.8593	49.6277	11.553	65.4655	57.5466	1.40476	1.82416	1.52368	-0.411536	0.581281	9780
(14933918,14943816)(15781578,15791578)(15781578,15791578)	NC_044998.1	15786578	36.2139	48.8364	11.7965	54.675	51.7557	1.41305	1.80497	1.49516	-0.154395	0.444379	9898
(14943817,14953425)(15791579,15801579)(15791579,15801579)	NC_044998.1	15796579	45.488	59.7163	10.0859	60.8037	60.26	1.27248	1.94102	1.74218	-0.022927	0.337185	9608
(14953426,14963267)(15801580,15811580)(15801580,15811580)	NC_044998.1	15806580	39.4109	52.8858	15.9763	53.2958	53.0908	1.38801	1.658	1.32351	-0.009966	0.359806	9841
(14963268,14973172)(15811581,15821581)(15811581,15821581)	NC_044998.1	15816581	39.4555	54.6015	11.8952	68.0596	61.3305	1.55841	1.91631	1.55483	-0.326844	0.574711	9904
(14973173,14982061)(15821582,15831582)(15821582,15831582)	NC_044998.1	15826582	53.2926	69.7531	23.6044	81.6838	75.7184	1.25902	1.54775	1.25388	-0.214895	0.437615	8888
(14982062,14991783)(15831583,15841583)(15831583,15841583)	NC_044998.1	15836583	41.6108	50.798	18.2885	64.3139	57.556	0.897061	1.3858	1.25033	-0.311355	0.397477	9721
(14991784,15001555)(15841584,15851584)(15841584,15851584)	NC_044998.1	15846584	47.6563	63.098	15.5665	75.3862	69.2421	1.31897	1.77693	1.50988	-0.247364	0.470527	9771
(15001556,15010945)(15851585,15861585)(15851585,15861585)	NC_044998.1	15856585	42.7877	57.0169	16.3375	61.9859	59.5014	1.35171	1.68798	1.38056	-0.111338	0.405306	9389
(15010946,15020327)(15861586,15871586)(15861586,15871586)	NC_044998.1	15866586	42.3852	57.0955	19.865	60.0974	58.5965	1.41049	1.55904	1.18615	-0.067897	0.396812	9381
(15020328,15029810)(15871587,15881587)(15871587,15881587)	NC_044998.1	15876587	37.1983	46.02	18.9056	55.3013	50.6607	0.961863	1.28767	1.09181	-0.238987	0.374872	9482
(15029811,15038710)(15881588,15891588)(15881588,15891588)	NC_044998.1	15886588	35.4093	43.9906	17.7587	60.463	52.2268	0.982111	1.30618	1.10422	-0.44542	0.491634	8899
(15038711,15048582)(15891589,15901589)(15891589,15901589)	NC_044998.1	15896589	34.8467	44.1235	7.63166	67.0543	55.5889	1.07854	1.84519	1.72875	-0.629993	0.616018	9871
(15048583,15058408)(15901590,15911590)(15901590,15911590)	NC_044998.1	15906590	45.9556	61.2878	20.5395	68.7947	65.0413	1.35743	1.57794	1.2385	-0.156675	0.43126	9825
(15058409,15067890)(15911591,15921591)(15911591,15921591)	NC_044998.1	15916591	40.3527	53.0627	12.8047	63.624	58.3433	1.27913	1.76771	1.52102	-0.250828	0.462277	9481
(15067891,15076928)(15921592,15931592)(15921592,15931592)	NC_044998.1	15926592	33.9572	44.1696	10.2689	48.1065	46.138	1.21785	1.7572	1.54223	-0.110973	0.371096	9037
(15076929,15086409)(15931593,15941593)(15931593,15941593)	NC_044998.1	15936593	37.5866	53.167	9.05242	54.8787	54.0228	1.68152	2.07419	1.68626	-0.043622	0.453015	9480
(15086410,15096165)(15941594,15951594)(15941594,15951594)	NC_044998.1	15946594	35.2548	49.5638	5.23027	52.1725	50.8682	1.64467	2.2168	1.88617	-0.07085	0.458405	9755
(15096166,15106034)(15951595,15961595)(15951595,15961595)	NC_044998.1	15956595	26.4645	32.5873	14.2792	35.2631	33.9252	0.93215	1.20355	1.00421	-0.096564	0.290471	9868
(15106035,15115207)(15961596,15971596)(15961596,15971596)	NC_044998.1	15966596	40.1035	55.1781	4.30362	60.0386	57.6084	1.52639	2.24726	1.9884	-0.116148	0.452556	9172
(15115208,15125127)(15971597,15981597)(15971597,15981597)	NC_044998.1	15976597	37.6788	52.0093	6.71489	54.8672	53.4383	1.5429	2.12465	1.82557	-0.072655	0.43331	9919
(15125128,15134961)(15981598,15991598)(15981598,15991598)	NC_044998.1	15986598	34.2831	43.0841	17.581	55.6417	49.3629	1.03974	1.30987	1.07755	-0.350633	0.45511	9833
(15134962,15144535)(15991599,16001599)(15991599,16001599)	NC_044998.1	15996599	31.5991	40.4213	15.2201	50.204	45.3126	1.12906	1.39941	1.1418	-0.296158	0.448488	9573
(15144536,15153502)(16001600,16011600)(16001600,16011600)	NC_044998.1	16006600	28.575	30.6421	28.4674	44.2258	37.434	0.291947	0.13292	0.008255	-0.454346	0.319865	8966
(15153503,15163145)(16011601,16021601)(16011601,16021601)	NC_044998.1	16016601	43.5252	54.9768	21.4573	62.2319	58.6043	1.06968	1.36809	1.13306	-0.159826	0.359543	9642
(15163146,15172066)(16021602,16031602)(16021602,16031602)	NC_044998.1	16026602	36.6158	46.2148	10.576	43.3844	44.7996	1.06298	1.71837	1.5778	0.07403	0.231461	8920
(15172067,15181074)(16031603,16041603)(16031603,16041603)	NC_044998.1	16036603	28.7009	38.7812	9.63565	37.2747	38.0279	1.41757	1.77392	1.45567	0.05017	0.335312	9007
(15181075,15190626)(16041604,16051604)(16041604,16051604)	NC_044998.1	16046604	37.8506	49.9288	18.5888	57.0192	53.474	1.29459	1.46366	1.13071	-0.179449	0.427645	9551
(15190627,15199477)(16051605,16061605)(16051605,16061605)	NC_044998.1	16056605	29.3614	35.959	14.3093	38.7517	37.3554	0.907373	1.28946	1.12484	-0.090929	0.281029	8850
(15199478,15208991)(16061606,16071606)(16061606,16071606)	NC_044998.1	16066606	31.3415	39.4085	18.3219	45.5372	42.4729	1.04073	1.18012	0.914685	-0.18705	0.366985	9513
(15208992,15218699)(16071607,16081607)(16071607,16081607)	NC_044998.1	16076607	40.9512	53.7123	10.6621	64.9282	59.3203	1.26579	1.86366	1.64892	-0.262506	0.465187	9707
(15218700,15228409)(16081608,16091608)(16081608,16091608)	NC_044998.1	16086608	31.1758	40.5601	11.7224	45.7787	43.1694	1.217	1.62211	1.37357	-0.160111	0.397483	9709
(15228410,15237523)(16091609,16101609)(16091609,16101609)	NC_044998.1	16096609	30.3181	40.9208	10.9035	50.4661	45.6935	1.41311	1.73402	1.40752	-0.301073	0.523742	9113
(15237524,15246813)(16101610,16111610)(16101610,16111610)	NC_044998.1	16106610	32.5277	40.2394	15.271	47.8909	44.0651	0.959283	1.34861	1.17038	-0.22508	0.366707	9289
(15246814,15256705)(16111611,16121611)(16111611,16121611)	NC_044998.1	16116611	38.5584	49.6532	15.6961	67.1334	58.3933	1.16771	1.55785	1.3185	-0.434335	0.533083	9891
(15256706,15265888)(16121612,16131612)(16121612,16131612)	NC_044998.1	16126612	33.855	45.6369	3.6696	49.6829	47.6599	1.40919	2.18162	1.97086	-0.114391	0.421828	9182
(15265889,15274649)(16131613,16141613)(16131613,16141613)	NC_044998.1	16136613	29.8695	36.2774	16.1867	36.1121	36.1947	0.866594	1.1772	1.00607	0.005292	0.218643	8760
(15274650,15283822)(16141614,16151614)(16141614,16151614)	NC_044998.1	16146614	30.6793	40.7511	10.7722	51.8444	46.2977	1.32685	1.71234	1.42714	-0.345818	0.525856	9172
(15283823,15292841)(16151615,16161615)(16151615,16161615)	NC_044998.1	16156615	36.9351	47.333	9.74684	54.9604	51.1467	1.14166	1.7972	1.63379	-0.19779	0.398516	9018
(15292842,15302466)(16161616,16171616)(16161616,16171616)	NC_044998.1	16166616	33.5041	40.3957	15.0063	46.8716	43.6336	0.83275	1.33308	1.21979	-0.184992	0.312716	9624
(15302467,15312373)(16171617,16181617)(16171617,16181617)	NC_044998.1	16176617	21.54	27.4995	7.8242	25.6633	26.5814	1.1089	1.57049	1.3699	0.081231	0.24015	9906
(15312374,15321577)(16181618,16191618)(16181618,16191618)	NC_044998.1	16186618	33.1486	45.3088	12.1693	56.4897	50.8992	1.48485	1.75786	1.39752	-0.32279	0.553779	9203
(15321578,15331391)(16191619,16201619)(16191619,16201619)	NC_044998.1	16196619	32.3037	42.7208	11.1142	38.151	40.4359	1.30465	1.71849	1.44656	0.13535	0.260244	9813
(15331392,15341299)(16201620,16211620)(16201620,16211620)	NC_044998.1	16206620	35.1243	47.6618	7.81952	47.1683	47.415	1.44631	1.99932	1.72139	0.013452	0.362173	9907
(15341300,15351082)(16211621,16221621)(16211621,16221621)	NC_044998.1	16216621	35.6224	44.2089	12.7799	59.5492	51.879	0.97691	1.55597	1.42088	-0.412346	0.47243	9782
(15351083,15360462)(16221622,16231622)(16221622,16231622)	NC_044998.1	16226622	36.5943	46.9715	11.9874	51.6151	49.2933	1.14981	1.68775	1.49181	-0.12153	0.359372	9379
(15360463,15370347)(16231623,16241623)(16231623,16241623)	NC_044998.1	16236623	30.4282	41.1602	9.1283	50.6878	45.924	1.42528	1.84401	1.53891	-0.299439	0.525967	9884
(15370348,15380182)(16241624,16251624)(16241624,16251624)	NC_044998.1	16246624	29.0226	39.8253	5.77773	50.1249	44.9751	1.50269	2.05041	1.75622	-0.339237	0.567254	9834
(15380183,15389447)(16251625,16261625)(16251625,16261625)	NC_044998.1	16256625	43.6609	53.0133	15.8067	66.6041	59.8087	0.870919	1.51402	1.42588	-0.29847	0.38384	9264
(15389448,15398421)(16261626,16271626)(16261626,16271626)	NC_044998.1	16266626	31.594	38.7184	12.7314	53.6886	46.2035	0.91192	1.44327	1.31514	-0.453276	0.477866	8973
(15398422,15407777)(16271627,16281627)(16271627,16281627)	NC_044998.1	16276627	34.1162	43.859	11.5836	58.7964	51.3277	1.15654	1.66549	1.46048	-0.419106	0.52195	9355
(15407778,15417556)(16281628,16291628)(16281628,16291628)	NC_044998.1	16286628	30.9753	37.2375	11.9661	44.5852	40.9113	0.817252	1.43029	1.35044	-0.226882	0.331389	9778
(15417557,15427487)(16291629,16301629)(16291629,16301629)	NC_044998.1	16296629	25.9913	30.9899	16.5635	32.3363	31.6631	0.774513	0.964716	0.790237	-0.049467	0.224766	9930
(15427488,15436807)(16301630,16311630)(16301630,16311630)	NC_044998.1	16306630	32.0498	43.6348	10.7934	52.0452	47.84	1.46219	1.79915	1.46204	-0.251065	0.509253	9319
(15436808,15446310)(16311631,16321631)(16311631,16321631)	NC_044998.1	16316631	48.2758	58.0199	19.2361	81.6935	69.8567	0.821758	1.43185	1.34946	-0.470473	0.464445	9502
(15446311,15455609)(16321632,16331632)(16321632,16331632)	NC_044998.1	16326632	40.1532	40.0001	17.0189	98.9891	69.4946	-0.015488	1.01393	1.2834	-1.40789	0.757641	9298
(15455610,15465486)(16331633,16341633)(16331633,16341633)	NC_044998.1	16336633	24.6252	28.6495	11.6698	50.0629	39.3562	0.657303	1.19494	1.14227	-0.829884	0.615527	9876
(15465487,15469360)(16341634,16367776)(16341634,16351634)	NC_044998.1	16346634	10.9573	13.2858	6.57485	19.5072	16.3965	0.829709	0.994561	0.80586	-0.534784	0.498749	3873
(15469360,15469360)(16367776,16367776)(16351635,16361635)	NC_044998.1	16356635	0	0	0	0	0	0					0
(15469360,15473189)(16367776,16371636)(16361636,16371636)	NC_044998.1	16366636	9.42209	10.4461	6.80745	20.069	15.2575	0.420791	0.616177	0.548071	-0.958294	0.618066	3829
(15473190,15483049)(16371637,16381637)(16371637,16381637)	NC_044998.1	16376637	32.7357	38.4182	19.2367	55.1697	46.794	0.702475	1.02976	0.909999	-0.489665	0.444038	9859
(15483050,15492846)(16381638,16391638)(16381638,16391638)	NC_044998.1	16386638	37.3348	49.5649	12.7253	64.2961	56.9305	1.32869	1.74337	1.4637	-0.37794	0.543688	9796
(15492847,15502430)(16391639,16401639)(16391639,16401639)	NC_044998.1	16396639	27.3405	37.3343	6.77747	35.5712	36.4528	1.47379	1.94766	1.64354	0.061609	0.343604	9583
(15502431,15512292)(16401640,16411640)(16401640,16411640)	NC_044998.1	16406640	30.4403	35.0556	13.9733	43.9152	39.4854	0.612697	1.2132	1.18929	-0.278336	0.306893	9861
(15512293,15522107)(16411641,16421641)(16411641,16421641)	NC_044998.1	16416641	38.3383	52.4332	5.48175	54.1967	53.3149	1.49184	2.1659	1.90528	-0.04407	0.404795	9814
(15522108,15530993)(16421642,16431642)(16421642,16431642)	NC_044998.1	16426642	38.2488	49.643	3.53817	54.0502	51.8466	1.20877	2.13164	2.0173	-0.110387	0.368376	8885
(15530994,15540902)(16431643,16441643)(16431643,16441643)	NC_044998.1	16436643	33.436	42.7584	2.5159	47.2135	44.986	1.12874	2.11707	2.04289	-0.127521	0.357283	9908
(15540903,15550386)(16441644,16451644)(16441644,16451644)	NC_044998.1	16446644	30.6535	35.7538	5.82259	57.2622	46.508	0.672462	1.71099	1.78155	-0.671054	0.534248	9483
(15550387,15560213)(16451645,16461645)(16451645,16461645)	NC_044998.1	16456645	32.3775	39.2337	1.43659	39.6209	39.4273	0.856753	2.05059	2.1077	-0.011441	0.225096	9826
(15560214,15570011)(16461646,16471646)(16461646,16471646)	NC_044998.1	16466646	29.8841	35.1178	4.73281	47.0783	41.098	0.707463	1.77956	1.84846	-0.382687	0.387448	9797
(15570012,15579724)(16471647,16481647)(16471647,16481647)	NC_044998.1	16476647	32.7566	39.5104	2.60376	43.9121	41.7112	0.834374	1.98011	2.03144	-0.128586	0.282659	9712
(15579725,15589353)(16481648,16491648)(16481648,16491648)	NC_044998.1	16486648	38.5531	51.5281	2.13278	56.2378	53.8829	1.36578	2.26641	2.10068	-0.117039	0.41206	9628
(15589354,15598927)(16491649,16501649)(16491649,16501649)	NC_044998.1	16496649	28.2778	31.3713	2.49821	35.5307	33.451	0.441412	1.78234	1.99609	-0.140571	0.188717	9573
(15598928,15608278)(16501650,16511650)(16501650,16511650)	NC_044998.1	16506650	42.4053	54.4359	6.05488	57.5428	55.9893	1.153	2.02504	1.91373	-0.07024	0.332346	9350
(15608279,15618042)(16511651,16521651)(16511651,16521651)	NC_044998.1	16516651	42.8763	53.79	5.93673	59.0454	56.4177	1.03463	1.98169	1.92422	-0.117512	0.327706	9763
(15618043,15627746)(16521652,16531652)(16521652,16531652)	NC_044998.1	16526652	30.969	34.7521	4.8968	35.5067	35.1294	0.493816	1.69006	1.85255	-0.023306	0.138787	9703
(15627747,15637163)(16531653,16541653)(16531653,16541653)	NC_044998.1	16536653	33.1051	38.9391	4.6512	36.8808	37.9099	0.713284	1.82106	1.8978	0.059498	0.150093	9416
(15637164,15646220)(16541654,16551654)(16541654,16551654)	NC_044998.1	16546654	35.974	46.1251	3.96765	39.9131	43.0191	1.14384	2.06751	1.97233	0.165357	0.202764	9056
(15646221,15656094)(16551655,16561655)(16551655,16561655)	NC_044998.1	16556655	42.9437	52.2372	4.16261	52.947	52.5921	0.879681	1.98784	2.0171	-0.015846	0.233133	9873
(15656095,15665888)(16561656,16571657)(16561656,16571656)	NC_044998.1	16566656	37.6434	44.3615	4.10419	40.5405	42.451	0.723986	1.89008	1.97918	0.097233	0.132312	9793
(15665888,15675636)(16571657,16581657)(16571657,16581657)	NC_044998.1	16576657	49.3402	58.4602	9.74609	73.9238	66.192	0.752741	1.76081	1.80159	-0.300721	0.354924	9748
(15675637,15685197)(16581658,16591658)(16581658,16591658)	NC_044998.1	16586658	35.5859	45.7107	11.3006	51.4563	48.5835	1.1531	1.70523	1.5121	-0.154598	0.378104	9560
(15685198,15695019)(16591659,16601659)(16591659,16601659)	NC_044998.1	16596659	26.5478	30.2526	19.3788	34.5216	32.3871	0.562281	0.712699	0.589073	-0.153585	0.226641	9821
(15695020,15704848)(16601660,16611660)(16601660,16611660)	NC_044998.1	16606660	31.1491	38.1955	20.7294	42.6816	40.4386	0.914583	0.983269	0.736309	-0.137754	0.308126	9828
(15704849,15713685)(16611661,16621707)(16611661,16621661)	NC_044998.1	16616661	49.2827	57.7735	25.7922	63.9525	60.863	0.701617	1.1573	1.07006	-0.120302	0.24418	8836
(15713685,15723097)(16621707,16631662)(16621662,16631662)	NC_044998.1	16626662	33.4199	35.9026	15.0164	53.2337	44.5681	0.300733	1.09928	1.21647	-0.496317	0.345016	9412
(15723098,15732797)(16631663,16641663)(16631663,16641663)	NC_044998.1	16636663	30.3284	31.6599	18.676	46.7248	39.1923	0.177402	0.749803	0.844505	-0.475013	0.30184	9699
(15732798,15742741)(16641664,16651664)(16641664,16651664)	NC_044998.1	16646664	33.9113	35.7923	19.0091	54.3656	45.079	0.224612	0.871068	0.971459	-0.524244	0.340683	9943
(15742742,15752230)(16651665,16661665)(16651665,16661665)	NC_044998.1	16656665	42.9112	46.5314	30.8892	52.1481	49.3398	0.342924	0.64726	0.625747	-0.125491	0.155448	9488
(15752231,15762137)(16661666,16671666)(16661666,16671666)	NC_044998.1	16666666	27.0296	28.4204	16.8487	35.9357	32.1781	0.207412	0.745619	0.822531	-0.265605	0.196332	9906
(15762138,15771991)(16671667,16681667)(16671667,16681667)	NC_044998.1	16676667	39.6131	47.6561	20.878	44.1045	45.8803	0.824332	1.19697	1.05292	0.085915	0.164009	9853
(15771992,15781861)(16681668,16691668)(16681668,16691668)	NC_044998.1	16686668	33.2314	35.1388	13.3948	48.3622	41.7505	0.232342	1.15064	1.31827	-0.380814	0.265126	9869
(15781862,15791669)(16691669,16701669)(16691669,16701669)	NC_044998.1	16696669	35.3784	35.7766	25.4256	38.6264	37.2015	0.045617	0.515843	0.623162	-0.077125	0.053341	9807
(15791670,15801585)(16701670,16711670)(16701670,16711670)	NC_044998.1	16706670	45.6179	54.776	15.9685	65.0192	59.8976	0.816738	1.51356	1.45508	-0.215357	0.325029	9915
(15801586,15810445)(16711671,16721671)(16711671,16721671)	NC_044998.1	16716671	46.7677	50.4474	24.2573	62.7199	56.5837	0.320199	0.997124	1.07855	-0.251716	0.217991	8859
(15810446,15820168)(16721672,16731672)(16721672,16731672)	NC_044998.1	16726672	28.8024	27.2265	21.7374	44.2783	35.7524	-0.220864	0.332966	0.537635	-0.565888	0.248991	9722
(15820169,15829886)(16731673,16741878)(16731673,16741673)	NC_044998.1	16736673	32.8244	35.8868	20.9685	46.201	41.0439	0.377567	0.798813	0.797183	-0.300685	0.258924	9717
(15829886,15839130)(16741878,16751674)(16741674,16751674)	NC_044998.1	16746674	37.3631	37.7146	26.4255	47.4125	42.5635	0.038153	0.533846	0.650067	-0.248619	0.144178	9244
(15839131,15848374)(16751675,16761675)(16751675,16761675)	NC_044998.1	16756675	40.2691	47.3485	22.1967	58.9161	53.1323	0.713936	1.10662	0.99982	-0.275292	0.331205	9243
(15848375,15858084)(16761676,16771676)(16761676,16771676)	NC_044998.1	16766676	49.3443	53.1756	32.4101	64.326	58.7508	0.316203	0.750527	0.770467	-0.216823	0.198099	9709
(15858085,15867617)(16771677,16781677)(16771677,16781677)	NC_044998.1	16776677	41.2546	46.5298	26.448	49.2361	47.883	0.519473	0.86318	0.800376	-0.062878	0.166642	9532
(15867618,15877532)(16781678,16791678)(16781678,16791678)	NC_044998.1	16786678	37.9323	38.3936	26.3971	52.7686	45.5811	0.04934	0.559107	0.675748	-0.363036	0.20892	9914
(15877533,15887245)(16791679,16801679)(16791679,16801679)	NC_044998.1	16796679	49.7365	58.3023	20.4174	60.4793	59.3908	0.701434	1.35879	1.3238	-0.042001	0.201729	9712
(15887246,15896645)(16801680,16811680)(16801680,16811680)	NC_044998.1	16806680	35.5459	35.0088	28.8766	47.2623	41.1356	-0.061235	0.304218	0.415703	-0.330076	0.162785	9399
(15896646,15906496)(16811681,16821681)(16811681,16821681)	NC_044998.1	16816681	39.1563	43.8376	24.7131	58.5045	51.1711	0.485297	0.86447	0.820783	-0.358905	0.31804	9850
(15906497,15916405)(16821682,16831682)(16821682,16831682)	NC_044998.1	16826682	50.9057	59.3692	33.4498	67.1313	63.2502	0.677335	0.908891	0.770661	-0.146331	0.252076	9908
(15916406,15926066)(16831683,16841683)(16831683,16841683)	NC_044998.1	16836683	44.587	43.0982	40.9185	64.0006	53.5494	-0.135804	0.086912	0.184041	-0.449563	0.208662	9660
(15926067,15935921)(16841684,16851684)(16841684,16851684)	NC_044998.1	16846684	33.7319	37.0565	28.6295	42.677	39.8668	0.399065	0.439597	0.334301	-0.159479	0.188131	9854
(15935922,15945212)(16851685,16861685)(16851685,16861685)	NC_044998.1	16856685	41.7752	43.4209	24.0812	71.029	57.2249	0.160064	0.821273	0.945013	-0.6335	0.383629	9290
(15945213,15954712)(16861686,16871686)(16861686,16871686)	NC_044998.1	16866686	41.0378	50.1659	28.032	40.6527	45.4093	0.903545	0.956231	0.706595	0.222187	0.110475	9499
(15954713,15964507)(16871687,16881687)(16871687,16881687)	NC_044998.1	16876687	33.8356	42.6432	19.4406	48.5024	45.5728	1.05404	1.20683	0.94039	-0.165747	0.358849	9794
(15964508,15974396)(16881688,16891688)(16881688,16891688)	NC_044998.1	16886688	31.61	36.9183	16.749	47.7861	42.3522	0.679132	1.11963	1.03564	-0.328895	0.351196	9888
(15974397,15984239)(16891689,16901689)(16891689,16901689)	NC_044998.1	16896689	44.5077	47.9686	25.1564	51.6215	49.795	0.316236	0.911188	0.972482	-0.078704	0.123316	9842
(15984240,15993609)(16901690,16911690)(16901690,16911690)	NC_044998.1	16906690	46.9702	55.7973	24.0846	68.4562	62.1268	0.764842	1.20233	1.09197	-0.258529	0.335158	9369
(15993610,16003082)(16911691,16921691)(16911691,16921691)	NC_044998.1	16916691	35.6779	41.8232	22.282	46.33	44.0766	0.698105	0.965986	0.832029	-0.120954	0.243698	9472
(16003083,16013043)(16921692,16931692)(16921692,16931692)	NC_044998.1	16926692	31.4374	38.7964	14.9515	50.9152	44.8558	0.94655	1.3306	1.15485	-0.368751	0.441058	9960
(16013044,16022979)(16931693,16941693)(16931693,16941693)	NC_044998.1	16936693	27.5982	33.411	15.5938	30.3118	31.8614	0.849404	1.12559	0.951041	0.107296	0.159285	9935
(16022980,16032663)(16941694,16951694)(16941694,16951694)	NC_044998.1	16946694	41.1256	42.7991	25.7523	48.2633	45.5312	0.16531	0.73494	0.833505	-0.127349	0.111103	9683
(16032664,16042122)(16951695,16961695)(16951695,16961695)	NC_044998.1	16956695	40.1205	41.9596	26.9302	46.0931	44.0264	0.186146	0.663619	0.73232	-0.098734	0.100938	9458
(16042123,16051138)(16961696,16971696)(16961696,16971696)	NC_044998.1	16966696	43.8	49.2327	19.5344	47.3097	48.2712	0.504318	1.20477	1.23839	0.042099	0.105947	9015
(16051139,16061034)(16971697,16981697)(16971697,16981697)	NC_044998.1	16976697	48.59	61.1092	23.0775	65.3848	63.247	1.04906	1.39528	1.17815	-0.084424	0.313416	9895
(16061035,16070926)(16981698,16991698)(16981698,16991698)	NC_044998.1	16986698	33.4174	36.3917	18.9083	47.7047	42.0482	0.360319	0.920251	0.959119	-0.324	0.267129	9891
(16070927,16080750)(16991699,17001699)(16991699,17001699)	NC_044998.1	16996699	50.6747	64.1067	13.1467	75.1756	69.6412	1.07981	1.79488	1.66412	-0.209616	0.389045	9823
(16080751,16090222)(17001700,17011700)(17001700,17011700)	NC_044998.1	17006700	42.6518	46.0374	16.7554	49.6529	47.8451	0.322631	1.21879	1.35579	-0.081266	0.126336	9471
(16090223,16099099)(17011701,17021701)(17011701,17021701)	NC_044998.1	17016701	40.6473	40.5627	30.5899	58.2427	49.4027	-0.008451	0.43484	0.551443	-0.416871	0.223364	8876
(16099100,16108491)(17021702,17031702)(17021702,17031702)	NC_044998.1	17026702	39.6474	38.7516	37.1095	51.0875	44.9196	-0.091724	0.073341	0.142509	-0.29815	0.137852	9391
(16108492,16118204)(17031703,17041703)(17031703,17041703)	NC_044998.1	17036703	38.2534	43.5435	19.7238	51.6377	47.5906	0.561146	1.10116	1.07677	-0.202712	0.252924	9712
(16118205,16127661)(17041704,17051704)(17041704,17051704)	NC_044998.1	17046704	38.8062	45.169	19.8574	58.4968	51.8329	0.665463	1.15408	1.08612	-0.329058	0.347897	9456
(16127662,16137179)(17051705,17061705)(17051705,17061705)	NC_044998.1	17056705	33.4949	38.0451	13.918	39.6948	38.87	0.549975	1.26713	1.29128	-0.047141	0.165982	9517
(16137180,16147064)(17061706,17071706)(17061706,17071706)	NC_044998.1	17066706	45.2808	52.5997	24.7412	63.5052	58.0525	0.657505	1.09436	1.01523	-0.23098	0.292845	9884
(16147065,16156908)(17071707,17081707)(17071707,17081707)	NC_044998.1	17076707	36.1188	38.0847	26.5886	40.5098	39.2973	0.220645	0.561626	0.585033	-0.064299	0.091117	9843
(16156909,16166810)(17081708,17091708)(17081708,17091708)	NC_044998.1	17086708	32.4238	37.3212	12.8453	36.0476	36.6844	0.611128	1.32607	1.33188	0.037585	0.135848	9901
(16166811,16175974)(17091709,17101709)(17091709,17101709)	NC_044998.1	17096709	28.5662	33.5588	19.0221	37.7828	35.6708	0.705346	0.888733	0.731952	-0.141326	0.256599	9163
(16175975,16185343)(17101710,17111710)(17101710,17111710)	NC_044998.1	17106710	34.6717	41.4355	16.4721	49.5803	45.5079	0.790269	1.26837	1.16163	-0.22489	0.323423	9368
(16185344,16194377)(17111711,17121711)(17111711,17121711)	NC_044998.1	17116711	34.7351	43.5309	20.0687	50.0988	46.8148	1.02584	1.19001	0.93449	-0.181018	0.359889	9033
(16194378,16203440)(17121712,17131712)(17121712,17131712)	NC_044998.1	17126712	29.3476	32.1254	9.63023	32.1468	32.1361	0.382203	1.34041	1.47412	-0.000697	0.098074	9062
(16203441,16213240)(17131713,17141713)(17131713,17141713)	NC_044998.1	17136713	39.8499	42.7373	21.2315	57.8034	50.2703	0.294195	0.955794	1.04041	-0.362301	0.271095	9799
(16213241,16222124)(17141714,17151714)(17141714,17151714)	NC_044998.1	17146714	46.8568	53.0382	15.6368	50.1625	51.6003	0.536875	1.42134	1.49312	0.058869	0.105145	8883
(16222125,16231544)(17151715,17161715)(17151715,17161715)	NC_044998.1	17156715	35.9696	42.3838	16.2573	48.0847	45.2343	0.722849	1.28146	1.21487	-0.151772	0.266676	9419
(16231545,16241323)(17161716,17171716)(17161716,17171716)	NC_044998.1	17166716	44.9833	51.1602	27.4292	51.5076	51.3339	0.558526	0.938189	0.87319	-0.007405	0.146565	9778
(16241324,16251179)(17171717,17181717)(17171717,17181717)	NC_044998.1	17176717	38.9712	43.1419	29.0163	61.8929	52.5174	0.43439	0.641432	0.568292	-0.461009	0.360262	9855
(16251180,16260567)(17181718,17191718)(17181718,17191718)	NC_044998.1	17186718	31.7664	36.8822	13.5911	43.4453	40.1637	0.651338	1.28684	1.2607	-0.19765	0.273203	9387
(16260568,16269516)(17191719,17201719)(17191719,17201719)	NC_044998.1	17196719	36.9405	38.8497	23.9419	58.1623	48.506	0.209589	0.712724	0.781002	-0.50073	0.324267	8948
(16269517,16279366)(17201720,17211721)(17201720,17211720)	NC_044998.1	17206720	37.1203	42.2639	22.2555	60.9964	51.6302	0.561988	0.952125	0.888994	-0.483357	0.40488	9849
(16279366,16288924)(17211721,17221721)(17211721,17221721)	NC_044998.1	17216721	42.7296	49.1874	22.8675	52.3249	50.7562	0.614282	1.09357	1.03805	-0.070396	0.194905	9558
(16288925,16298684)(17221722,17231722)(17221722,17231722)	NC_044998.1	17226722	28.3932	32.43	14.6923	37.3744	34.9022	0.573713	1.09072	1.05679	-0.166428	0.236496	9759
(16298685,16308143)(17231723,17241723)(17231723,17241723)	NC_044998.1	17236723	33.3054	36.4417	19.4177	41.0533	38.7475	0.381199	0.898956	0.920977	-0.132513	0.168994	9458
(16308144,16317914)(17241724,17251724)(17241724,17251724)	NC_044998.1	17246724	28.402	31.3923	18.2133	35.9272	33.6598	0.424858	0.810161	0.78565	-0.152596	0.190976	9770
(16317915,16327151)(17251725,17261725)(17251725,17261725)	NC_044998.1	17256725	29.1075	30.4079	19.6943	50.1374	40.2727	0.18037	0.643401	0.709237	-0.647948	0.395882	9236
(16327152,16337066)(17261726,17271726)(17261726,17271726)	NC_044998.1	17266726	41.4479	42.9481	27.9623	56.1293	49.5387	0.147047	0.641233	0.725707	-0.304832	0.202468	9914
(16337067,16346907)(17271727,17281728)(17271727,17281727)	NC_044998.1	17276727	34.5278	37.4969	23.128	47.3558	42.4264	0.348329	0.732994	0.730506	-0.273342	0.236713	9840
(16346907,16356337)(17281728,17291728)(17281728,17291728)	NC_044998.1	17286728	33.7932	39.575	12.8274	41.4906	40.5328	0.692783	1.39288	1.37128	-0.054256	0.206308	9430
(16356338,16366190)(17291729,17301729)(17291729,17301729)	NC_044998.1	17296729	33.5665	33.4755	14.0363	47.0707	40.2731	-0.010981	1.01884	1.28559	-0.387645	0.206663	9852
(16366191,16375968)(17301730,17311730)(17301730,17311730)	NC_044998.1	17306730	28.6826	30.0477	19.3384	34.9933	32.5205	0.192088	0.652207	0.713878	-0.164805	0.138061	9777
(16375969,16385819)(17311731,17321731)(17311731,17321731)	NC_044998.1	17316731	33.4475	39.7823	13.594	56.4085	48.0954	0.766745	1.37725	1.31129	-0.475741	0.452959	9850
(16385820,16395567)(17321732,17331732)(17321732,17331732)	NC_044998.1	17326732	53.4243	63.0085	21.7382	66.8121	64.9103	0.731285	1.38082	1.33507	-0.068342	0.223589	9747
(16395568,16405403)(17331733,17341733)(17331733,17341733)	NC_044998.1	17336733	48.0755	52.8227	27.146	61.8013	57.312	0.401994	0.951784	0.976489	-0.179174	0.199599	9835
(16405404,16415258)(17341734,17351734)(17341734,17351734)	NC_044998.1	17346734	53.3925	62.4696	23.2616	78.6257	70.5477	0.693006	1.31258	1.27027	-0.29046	0.334144	9854
(16415259,16425085)(17351735,17361735)(17351735,17361735)	NC_044998.1	17356735	41.1256	41.8772	25.893	55.9671	48.9222	0.074244	0.689128	0.825878	-0.328384	0.196617	9826
(16425086,16434959)(17361736,17371736)(17361736,17371736)	NC_044998.1	17366736	43.2292	47.9682	22.2322	54.2151	51.0916	0.445647	1.05736	1.08518	-0.138551	0.188738	9873
(16434960,16444816)(17371737,17381737)(17371737,17381737)	NC_044998.1	17376737	33.8223	36.9107	23.9828	44.3882	40.6494	0.369737	0.672662	0.643031	-0.211608	0.208809	9856
(16444817,16454460)(17381738,17391738)(17381738,17391738)	NC_044998.1	17386738	34.427	37.5899	7.73372	53.3871	45.4885	0.372121	1.52731	1.71529	-0.43926	0.33246	9643
(16454461,16464162)(17391739,17401739)(17391739,17401739)	NC_044998.1	17396739	45.8505	48.0091	22.8163	58.8838	53.4464	0.191543	0.977734	1.12491	-0.227483	0.172028	9701
(16464163,16469032)(17401740,17414967)(17401740,17411740)	NC_044998.1	17406740	24.6818	25.9313	13.3273	21.6352	23.7833	0.203634	0.885084	0.998965	0.166119	-0.037459	4869
(16469032,16469109)(17414967,17422699)(17411741,17421741)	NC_044998.1	17416741	0.518772	0.625126	0.087507	0.190161	0.407643	0.455417	0.722768	0.681986	0.566597	-0.131326	77
(16469109,16470061)(17422699,17432299)(17421742,17431742)	NC_044998.1	17426742	9.80187	11.2851	1.94034	10.207	10.7461	0.587261	1.52849	1.5927	0.103316	0.096309	952
(16470061,16471817)(17432299,17441743)(17431743,17441743)	NC_044998.1	17436743	10.6415	12.7284	3.76516	15.7558	14.2421	0.764503	1.36333	1.29716	-0.267771	0.339532	1756
(16471818,16481657)(17441744,17451744)(17441744,17451744)	NC_044998.1	17446744	37.9946	41.6987	16.2606	56.8108	49.2548	0.395547	1.18369	1.27121	-0.381028	0.307063	9839
(16481658,16491192)(17451745,17461745)(17451745,17461745)	NC_044998.1	17456745	35.9786	41.7436	13.8901	49.9665	45.855	0.649518	1.36584	1.361	-0.21886	0.284214	9534
(16491193,16501021)(17461746,17471746)(17461746,17471746)	NC_044998.1	17466746	33.6256	37.9955	12.9779	37.7879	37.8917	0.526168	1.30901	1.35687	0.005908	0.131233	9828
(16501022,16510839)(17471747,17481747)(17471747,17481747)	NC_044998.1	17476747	36.5391	37.5321	20.5748	57.3897	47.4609	0.110195	0.819268	0.969244	-0.520478	0.309542	9817
(16510840,16520307)(17481748,17491748)(17481748,17491748)	NC_044998.1	17486748	42.5817	45.9555	30.0515	57.1649	51.5602	0.322023	0.663015	0.657047	-0.252373	0.21877	9467
(16520308,16530068)(17491749,17501749)(17491749,17501749)	NC_044998.1	17496749	35.0923	37.2681	19.4336	63.5257	50.3969	0.251228	0.895736	0.988035	-0.716385	0.451392	9760
(16530069,16539948)(17501750,17511750)(17501750,17511750)	NC_044998.1	17506750	35.3585	40.1406	18.1607	50.9835	45.5621	0.54808	1.09597	1.07736	-0.293614	0.298709	9879
(16539949,16549139)(17511751,17521751)(17511751,17521751)	NC_044998.1	17516751	32.5599	32.2244	19.2781	57.6299	44.9272	-0.041693	0.69861	0.899949	-0.746607	0.392703	9190
(16549140,16558852)(17521752,17531752)(17521752,17531752)	NC_044998.1	17526752	25.0888	24.6984	15.1747	33.7613	29.2298	-0.062604	0.658524	0.858987	-0.344813	0.169898	9712
(16558853,16568693)(17531753,17541753)(17531753,17541753)	NC_044998.1	17536753	29.8154	34.9872	9.97974	30.7744	32.8808	0.700687	1.46784	1.46097	0.1351	0.106154	9840
(16568694,16578277)(17541754,17551754)(17541754,17551754)	NC_044998.1	17546754	25.849	26.9362	10.495	25.7616	26.3489	0.169357	1.10518	1.29361	0.043389	0.019915	9583
(16578278,16587930)(17551755,17561931)(17551755,17561755)	NC_044998.1	17556755	24.7718	27.2133	6.18423	32.9102	30.0618	0.396474	1.47164	1.62977	-0.219496	0.219757	9652
(16587930,16597631)(17561931,17571756)(17561756,17571756)	NC_044998.1	17566756	32.1148	35.9795	15.6464	52.5175	44.2485	0.486815	1.11175	1.13054	-0.492695	0.390548	9701
(16597632,16607539)(17571757,17581757)(17571757,17581757)	NC_044998.1	17576757	30.7123	38.7819	9.65532	44.9902	41.886	1.06197	1.66196	1.50804	-0.193329	0.375811	9907
(16607540,16617506)(17581758,17591758)(17581758,17591758)	NC_044998.1	17586758	32.7236	41.5148	4.1348	46.9583	44.2365	1.08715	2.00744	1.92791	-0.159179	0.363774	9966
(16617507,16626628)(17591759,17601759)(17591759,17601759)	NC_044998.1	17596759	45.8866	50.8206	11.4568	65.4402	58.1304	0.437481	1.52655	1.68016	-0.305582	0.277075	9121
(16626629,16636344)(17601760,17611760)(17601760,17611760)	NC_044998.1	17606760	23.0007	23.5708	12.5449	31.5213	27.5461	0.099528	0.827505	0.982514	-0.329639	0.203062	9715
(16636345,16645768)(17611761,17621761)(17611761,17621761)	NC_044998.1	17616761	37.0459	39.76	15.8826	51.3956	45.5778	0.297129	1.13843	1.26811	-0.300833	0.238544	9423
(16645769,16653562)(17621762,17631762)(17621762,17631762)	NC_044998.1	17626762	38.4753	44.9603	8.584	53.5697	49.265	0.683984	1.67231	1.72743	-0.214379	0.290602	7793
(16653563,16663522)(17631763,17641763)(17631763,17641763)	NC_044998.1	17636763	35.0432	44.9216	16.0963	43.4373	44.1795	1.14215	1.44969	1.19711	0.040551	0.269834	9959
(16663523,16672875)(17641764,17652024)(17641764,17651764)	NC_044998.1	17646764	45.8486	50.6239	17.7374	60.9685	55.7962	0.423751	1.27638	1.37291	-0.216401	0.225295	9352
(16672875,16682060)(17652024,17661765)(17651765,17661765)	NC_044998.1	17656765	38.3301	42.7296	17.0525	53.8443	48.2869	0.465751	1.18474	1.2341	-0.277804	0.269174	9185
(16682061,16691806)(17661766,17671766)(17661766,17671766)	NC_044998.1	17666766	27.6705	33.2555	10.6081	45.3374	39.2965	0.814027	1.42717	1.34843	-0.417199	0.433257	9745
(16691807,16701568)(17671767,17681767)(17671767,17681767)	NC_044998.1	17676767	43.8562	46.2932	19.6458	77.3162	61.8047	0.225946	1.07967	1.23405	-0.678287	0.424766	9761
(16701569,16711430)(17681768,17691768)(17681768,17691768)	NC_044998.1	17686768	22.247	25.9836	9.16159	32.0657	29.0247	0.673786	1.30267	1.26833	-0.260615	0.312821	9861
(16711431,16721255)(17691769,17701769)(17691769,17701769)	NC_044998.1	17696769	32.9751	35.6707	16.9284	40.5843	38.1275	0.330861	0.999186	1.07428	-0.142595	0.161578	9824
(16721256,16730755)(17701770,17711770)(17701770,17711770)	NC_044998.1	17706770	47.5237	48.3507	26.9147	68.9761	58.6634	0.070836	0.803535	0.972299	-0.416347	0.243495	9499
(16730756,16740149)(17711771,17721771)(17711771,17721771)	NC_044998.1	17716771	33.0585	37.0179	8.66806	55.2985	46.1582	0.484777	1.50773	1.62896	-0.529185	0.409781	9393
(16740150,16749906)(17721772,17731772)(17721772,17731772)	NC_044998.1	17726772	48.483	56.5194	14.633	86.8804	71.6999	0.674891	1.53999	1.5665	-0.60081	0.497542	9756
(16749907,16759774)(17731773,17741773)(17731773,17741773)	NC_044998.1	17736773	43.8602	47.2706	16.9156	72.1042	59.6874	0.316154	1.22978	1.3733	-0.54291	0.374526	9867
(16759775,16769502)(17741774,17751774)(17741774,17751774)	NC_044998.1	17746774	36.6356	42.6053	10.7869	55.1744	48.8899	0.660729	1.53337	1.56542	-0.328579	0.346402	9727
(16769503,16779398)(17751775,17761775)(17751775,17761775)	NC_044998.1	17756775	32.0693	36.1962	10.5328	41.9743	39.0852	0.520562	1.4051	1.48045	-0.172382	0.226137	9895
(16779399,16789188)(17761776,17771776)(17761776,17771776)	NC_044998.1	17766776	35.8261	40.5112	10.924	52.5701	46.5406	0.530056	1.45678	1.54059	-0.322313	0.309626	9789
(16789189,16798637)(17771777,17781777)(17771777,17781777)	NC_044998.1	17776777	35.0895	35.6299	21.0667	43.9886	39.8093	0.062401	0.73149	0.884881	-0.22807	0.139216	9448
(16798638,16808326)(17781778,17791778)(17781778,17791778)	NC_044998.1	17786778	39.5076	41.215	34.3062	38.0132	39.6141	0.175451	0.309618	0.293071	0.077659	0.002793	9688
(16808327,16818247)(17791780,17801779)(17791779,17801779)	NC_044998.1	17796779	38.5251	42.9415	15.0619	62.1929	52.5672	0.465211	1.2801	1.35427	-0.478755	0.377717	9920
(16818248,16828176)(17801780,17811780)(17801780,17811780)	NC_044998.1	17806780	38.4	40.1033	26.0754	52.8965	46.4999	0.179993	0.646116	0.713583	-0.319177	0.218578	9928
(16828177,16838027)(17811781,17821781)(17811781,17821781)	NC_044998.1	17816781	29.4445	34.5142	18.0862	41.9636	38.2389	0.695317	0.975825	0.846538	-0.241872	0.308311	9850
(16838028,16847570)(17821782,17831782)(17821782,17831782)	NC_044998.1	17826782	26.6099	28.7945	13.6133	32.852	30.8233	0.330809	0.992817	1.06557	-0.14564	0.163161	9542
(16847571,16857468)(17831783,17841783)(17831783,17841783)	NC_044998.1	17836783	27.4584	26.4246	17.2259	37.7255	32.0751	-0.151812	0.583929	0.81455	-0.393215	0.173352	9897
(16857469,16867240)(17841784,17851784)(17841784,17851784)	NC_044998.1	17846784	31.8156	33.7176	22.572	43.2621	38.4898	0.241796	0.614888	0.640224	-0.286998	0.216814	9771
(16867241,16876998)(17851785,17861785)(17851785,17861785)	NC_044998.1	17856785	30.7059	35.5699	16.8881	43.3157	39.4428	0.64025	1.06619	0.989781	-0.241257	0.293915	9757
(16876999,16886921)(17861786,17871786)(17861786,17871786)	NC_044998.1	17866786	28.8644	32.2561	16.22	54.4108	43.3335	0.474325	0.970764	0.960267	-0.733666	0.517276	9922
(16886922,16896822)(17871787,17881787)(17871787,17881787)	NC_044998.1	17876787	29.9697	32.2146	24.6165	40.7663	36.4905	0.30261	0.44379	0.392364	-0.272841	0.224662	9900
(16896823,16906737)(17881788,17891788)(17881788,17891788)	NC_044998.1	17886788	28.5659	31.1862	24.0335	36.1434	33.6648	0.370202	0.437301	0.347597	-0.165861	0.184163	9914
(16906738,16916568)(17891789,17901789)(17891789,17901789)	NC_044998.1	17896789	26.7055	28.2464	23.5642	33.6856	30.966	0.232517	0.305167	0.256685	-0.194539	0.164405	9830
(16916569,16925502)(17901790,17911790)(17901790,17911790)	NC_044998.1	17906790	39.0021	41.4279	19.4293	56.3268	48.8773	0.252451	0.998172	1.1165	-0.366014	0.262426	8933
(16925503,16935398)(17911791,17921791)(17911791,17921791)	NC_044998.1	17916791	41.6481	43.9049	26.1674	62.6276	53.2663	0.220172	0.755459	0.829227	-0.430915	0.289359	9895
(16935399,16945060)(17921792,17931792)(17921792,17931792)	NC_044998.1	17926792	32.0365	35.896	19.1428	51.5118	43.7039	0.487327	0.918157	0.887192	-0.466346	0.376441	9661
(16945061,16954894)(17931793,17941793)(17931793,17941793)	NC_044998.1	17936793	40.5197	45.5211	32.0024	73.4876	59.5044	0.501301	0.59124	0.468409	-0.661477	0.485835	9833
(16954895,16964823)(17941794,17951794)(17941794,17951794)	NC_044998.1	17946794	35.6663	40.9457	23.8578	55.4342	48.19	0.599939	0.844978	0.73366	-0.388974	0.363508	9928
(16964824,16974524)(17951795,17961803)(17951795,17961795)	NC_044998.1	17956795	46.3819	45.7042	37.624	76.5564	61.1303	-0.059451	0.310112	0.422981	-0.638028	0.330226	9700
(16974524,16984226)(17961803,17971796)(17961796,17971796)	NC_044998.1	17966796	34.4348	33.2951	28.5057	51.2922	42.2936	-0.134057	0.24495	0.380914	-0.500315	0.23615	9702
(16984227,16992981)(17971797,17981797)(17971797,17981797)	NC_044998.1	17976797	40.6366	41.589	27.5295	58.0947	49.8418	0.095189	0.613186	0.71884	-0.389284	0.2349	8754
(16992982,17002922)(17981798,17991798)(17981798,17991798)	NC_044998.1	17986798	30.96	30.8697	32.8436	53.8365	42.3531	-0.011795	-0.111771	-0.133874	-0.709518	0.38017	9940
(17002923,17012736)(17991799,18001799)(17991799,18001799)	NC_044998.1	17996799	33.8322	33.2653	39.8038	62.1007	47.683	-0.067838	-0.340115	-0.390153	-0.815785	0.423511	9813
(17012737,17022622)(18001800,18011800)(18001800,18011800)	NC_044998.1	18006800	25.7901	28.4645	25.2472	48.5379	38.5012	0.41755	0.216732	0.045834	-0.743175	0.507586	9885
(17022623,17032522)(18011801,18021801)(18011801,18021801)	NC_044998.1	18016801	25.2369	28.1053	22.6803	44.5431	36.3242	0.45742	0.373035	0.220297	-0.621772	0.452261	9899
(17032523,17042344)(18021802,18031802)(18021802,18031802)	NC_044998.1	18026802	31.2083	36.9753	14.5356	55.2415	46.1084	0.747132	1.26097	1.17606	-0.559849	0.493303	9821
(17042345,17052192)(18031803,18041803)(18031803,18041803)	NC_044998.1	18036803	36.4232	44.6435	14.046	70.9407	57.7921	0.915042	1.4828	1.36272	-0.691438	0.607529	9847
(17052193,17061938)(18041804,18051804)(18041804,18051804)	NC_044998.1	18046804	25.4128	26.9865	17.9893	45.314	36.1503	0.249274	0.614615	0.635505	-0.688506	0.435022	9745
(17061939,17071824)(18051805,18061805)(18051805,18061805)	NC_044998.1	18056805	22.8844	21.9861	17.6479	35.4882	28.7372	-0.157576	0.327145	0.494391	-0.562625	0.262769	9885
(17071825,17081614)(18061806,18071806)(18061806,18071806)	NC_044998.1	18066806	22.0681	23.9977	16.9304	43.3066	33.6522	0.350708	0.55145	0.501731	-0.834	0.538904	9789
(17081615,17091546)(18071807,18081807)(18071807,18081807)	NC_044998.1	18076807	28.3694	31.1831	18.5523	56.212	43.6975	0.400204	0.777307	0.75782	-0.843174	0.557386	9931
(17091547,17101441)(18081808,18091808)(18081808,18091808)	NC_044998.1	18086808	19.4666	22.9119	8.64808	36.7871	29.8495	0.707272	1.25149	1.18648	-0.678319	0.54599	9894
(17101442,17111261)(18091809,18101809)(18091809,18101809)	NC_044998.1	18096809	22.2289	24.1944	9.55933	41.5946	32.8945	0.354708	1.13418	1.22895	-0.746189	0.492664	9819
(17111262,17121172)(18101810,18111810)(18101810,18111810)	NC_044998.1	18106810	27.2524	29.556	14.6182	46.6101	38.0831	0.340793	0.955041	1.01288	-0.597838	0.409699	9910
(17121173,17130815)(18111811,18121811)(18111811,18121811)	NC_044998.1	18116811	26.7534	29.1684	14.873	44.0741	36.6213	0.363786	0.930138	0.969151	-0.532176	0.380116	9642
(17130816,17140197)(18121812,18131812)(18121812,18131812)	NC_044998.1	18126812	34.5035	38.3009	22.925	57.6861	47.9935	0.445809	0.784892	0.742455	-0.537838	0.404564	9381
(17140198,17150031)(18131813,18141813)(18131813,18141813)	NC_044998.1	18136813	43.6807	46.9054	29.1841	70.4852	58.6953	0.300162	0.720802	0.74177	-0.517605	0.356743	9833
(17150032,17159796)(18141814,18151814)(18141814,18151814)	NC_044998.1	18146814	24.0826	24.4103	21.6855	37.0147	30.7125	0.054693	0.195829	0.215798	-0.499374	0.283142	9764
(17159797,17169655)(18151815,18161816)(18151815,18161815)	NC_044998.1	18156815	29.1211	28.9426	21.4238	46.2485	37.5956	-0.024749	0.451339	0.579698	-0.56809	0.30034	9858
(17169655,17179596)(18161816,18171816)(18161816,18171816)	NC_044998.1	18166816	36.6692	38.4737	35.9835	58.3473	48.4105	0.199539	0.1199	0.041491	-0.519061	0.3316	9941
(17179597,17189492)(18171817,18181817)(18171817,18181817)	NC_044998.1	18176817	30.6334	35.1125	19.3974	50.7531	42.9328	0.590949	0.898904	0.806648	-0.488296	0.414721	9895
(17189493,17199114)(18181818,18191818)(18181818,18191818)	NC_044998.1	18186818	36.9404	42.376	20.3333	57.8672	50.1216	0.596736	1.05384	0.997812	-0.401653	0.369572	9621
(17199115,17208915)(18191819,18201819)(18191819,18201819)	NC_044998.1	18196819	34.6216	36.8933	25.2007	51.0178	43.9556	0.2658	0.594917	0.602137	-0.390556	0.278983	9800
(17208916,17217958)(18201820,18211820)(18201820,18211820)	NC_044998.1	18206820	35.1809	41.5715	17.7574	55.6726	48.6221	0.736054	1.19317	1.09675	-0.383758	0.395448	9042
(17217959,17227752)(18211821,18221821)(18211821,18221821)	NC_044998.1	18216821	36.1805	34.3637	30.3448	60.2973	47.3305	-0.203571	0.196017	0.357657	-0.68642	0.319098	9793
(17227753,17236917)(18221822,18231822)(18221822,18231822)	NC_044998.1	18226822	22.3928	23.305	21.7263	34.1571	28.731	0.163452	0.121507	0.064211	-0.462013	0.290678	9164
(17236918,17246648)(18231823,18241823)(18231823,18241823)	NC_044998.1	18236823	23.7634	23.028	26.949	31.3113	27.1696	-0.12436	-0.285375	-0.290383	-0.332537	0.147387	9730
(17246649,17255141)(18241824,18251824)(18241824,18251824)	NC_044998.1	18246824	33.3613	36.2561	24.4452	70.7868	53.5214	0.351269	0.622678	0.59034	-0.990593	0.625002	8492
(17255142,17265086)(18251825,18261825)(18251825,18261825)	NC_044998.1	18256825	26.43	25.4779	33.009	50.9541	38.216	-0.145131	-0.495693	-0.542851	-0.92059	0.459456	9944
(17265087,17274104)(18261826,18271826)(18261826,18271826)	NC_044998.1	18266826	24.1482	28.1191	21.3071	52.6529	40.386	0.661074	0.488328	0.255121	-0.969393	0.691623	9017
(17274105,17284002)(18271827,18281827)(18271827,18281827)	NC_044998.1	18276827	25.9674	26.7071	30.4252	48.1562	37.4316	0.114723	-0.248856	-0.373981	-0.788738	0.454729	9897
(17284003,17293908)(18281828,18291828)(18281828,18291828)	NC_044998.1	18286828	28.38	29.2235	35.1265	41.3142	35.2689	0.11994	-0.363144	-0.520605	-0.407163	0.250415	9905
(17293909,17303501)(18291829,18301835)(18291829,18301829)	NC_044998.1	18296829	28.0753	25.5079	32.3588	45.1821	35.345	-0.36893	-0.425804	-0.333916	-0.669662	0.267072	9592
(17303501,17310796)(18301835,18311833)(18301830,18311830)	NC_044998.1	18306830	22.8474	23.469	27.7739	31.3572	27.4131	0.109229	-0.325124	-0.465831	-0.329225	0.205311	7295
(17310796,17320697)(18311833,18321831)(18311831,18321831)	NC_044998.1	18316831	22.5597	22.1927	31.9123	29.9971	26.0949	-0.065281	-0.742866	-0.894834	-0.329832	0.160954	9901
(17320698,17330556)(18321832,18331832)(18321832,18331832)	NC_044998.1	18326832	31.1224	37.7092	29.596	38.0486	37.8789	0.855632	0.457112	0.107953	-0.01043	0.224296	9858
(17330557,17340440)(18331833,18341833)(18331833,18341833)	NC_044998.1	18336833	26.219	29.7541	29.1215	41.0874	35.4208	0.543113	0.041959	-0.241301	-0.412794	0.361548	9883
(17340441,17350192)(18341834,18351834)(18341834,18351834)	NC_044998.1	18346834	35.8757	41.8427	37.6436	57.0527	49.4477	0.674183	0.206479	-0.109228	-0.405977	0.391668	9751
(17350193,17359776)(18351835,18361835)(18351835,18361835)	NC_044998.1	18356835	30.5979	37.8118	20.3535	45.266	41.5389	0.952834	0.999722	0.736276	-0.232985	0.369335	9583
(17359777,17369648)(18361836,18371836)(18361836,18371836)	NC_044998.1	18366836	27.9756	34.9106	20.8641	43.0986	39.0046	1.00001	0.875999	0.556242	-0.279684	0.406607	9871
(17369649,17379440)(18371837,18381837)(18371837,18381837)	NC_044998.1	18376837	28.5137	35.9086	13.0997	47.2924	41.6005	1.04662	1.39691	1.18418	-0.381574	0.473518	9791
(17379441,17389244)(18381838,18391838)(18381838,18391838)	NC_044998.1	18386838	29.1661	35.8722	13.6918	48.9991	42.4356	0.92834	1.32949	1.1637	-0.43025	0.469567	9803
(17389245,17399179)(18391839,18401839)(18391839,18401839)	NC_044998.1	18396839	24.1988	26.5255	31.8031	39.82	33.1727	0.386556	-0.37758	-0.681496	-0.52421	0.381446	9934
(17399180,17408559)(18401840,18411840)(18401840,18411840)	NC_044998.1	18406840	18.6398	24.0668	15.2334	31.4071	27.7369	1.16192	0.806967	0.388805	-0.374538	0.499053	9379
(17408560,17418479)(18411841,18421841)(18411841,18421841)	NC_044998.1	18416841	19.3262	24.5875	16.6665	29.9632	27.2753	1.08767	0.69968	0.293651	-0.264684	0.420968	9919
(17418480,17428398)(18421842,18431842)(18421842,18431842)	NC_044998.1	18426842	27.3387	34.211	24.4751	43.294	38.7525	1.01352	0.62059	0.228892	-0.317412	0.430416	9918
(17428399,17438315)(18431843,18441843)(18431843,18441843)	NC_044998.1	18436843	20.5089	19.474	27.1466	41.9709	30.7225	-0.201961	-0.641207	-0.693768	-1.04463	0.510427	9916
(17438316,17448157)(18441844,18451844)(18441844,18451844)	NC_044998.1	18446844	25.4905	33.5412	21.4778	36.9888	35.265	1.27136	0.821693	0.34254	-0.129123	0.394817	9841
(17448158,17458021)(18451845,18461845)(18451845,18461845)	NC_044998.1	18456845	28.8501	36.187	31.3759	35.1318	35.6594	1.02655	0.291385	-0.191902	0.034961	0.243553	9863
(17458022,17467930)(18461846,18471846)(18461846,18471846)	NC_044998.1	18466846	17.9184	23.8672	4.70876	31.4502	27.6587	1.32321	1.81547	1.56326	-0.402273	0.555275	9908
(17467931,17477857)(18471847,18481847)(18471847,18481847)	NC_044998.1	18476847	22.6992	26.9797	9.15474	40.584	33.7818	0.756898	1.35448	1.28848	-0.571457	0.501544	9926
(17477858,17487621)(18481848,18491848)(18481848,18491848)	NC_044998.1	18486848	37.6473	39.9602	35.698	54.8558	47.408	0.249221	0.200092	0.115023	-0.379009	0.268595	9763
(17487622,17497454)(18491849,18501849)(18491849,18501849)	NC_044998.1	18496849	29.5132	30.8479	40.3205	34.3181	32.583	0.182634	-0.561425	-0.803698	-0.112415	0.107374	9832
(17497455,17507183)(18501850,18511850)(18501850,18511850)	NC_044998.1	18506850	23.2298	25.803	19.5668	48.7737	37.2883	0.444866	0.463685	0.341049	-0.943108	0.621981	9728
(17507184,17515912)(18511851,18521851)(18511851,18521851)	NC_044998.1	18516851	32.6989	34.2078	38.6529	47.2576	40.7327	0.186731	-0.238887	-0.401796	-0.381884	0.25403	8728
(17515913,17525274)(18521852,18531852)(18521852,18531852)	NC_044998.1	18526852	31.6007	33.4052	29.9544	52.5552	42.9802	0.23093	0.191611	0.114757	-0.579713	0.372138	9361
(17525275,17534655)(18531853,18541853)(18531853,18541853)	NC_044998.1	18536853	29.7883	30.9571	30.1579	39.9216	35.4393	0.158489	0.04695	-0.027246	-0.287741	0.195865	9380
(17534656,17541371)(18541854,18551883)(18541854,18551854)	NC_044998.1	18546854	29.0106	31.7942	28.9849	52.7275	42.2608	0.387355	0.169246	0.001944	-0.689758	0.471354	6715
(17541371,17543789)(18551883,18561855)(18551855,18561855)	NC_044998.1	18556855	10.8725	10.983	11.2359	15.1165	13.0497	0.039689	-0.037732	-0.067281	-0.358008	0.201139	2418
(17543790,17546528)(18561856,18571856)(18561856,18571856)	NC_044998.1	18566856	8.16486	8.51026	6.24784	19.2249	13.8676	0.162313	0.433954	0.454049	-1.22622	0.691913	2738
(17546529,17553527)(18571857,18581857)(18571857,18581857)	NC_044998.1	18576857	32.6537	36.4133	28.5843	44.9541	40.6837	0.465904	0.421305	0.27498	-0.250281	0.25426	6998
(17553528,17563341)(18581858,18591858)(18581858,18591858)	NC_044998.1	18586858	36.7718	44.4561	35.1397	58.9308	51.6934	0.847403	0.447369	0.098487	-0.377007	0.420263	9813
(17563342,17572927)(18591859,18601859)(18591859,18601859)	NC_044998.1	18596859	29.1977	33.3629	28.8036	47.131	40.2469	0.575978	0.272999	0.029609	-0.450782	0.39058	9585
(17572928,17580549)(18601860,18611860)(18601860,18611860)	NC_044998.1	18606860	36.144	40.5594	31.7524	41.116	40.8377	0.49523	0.429967	0.26941	-0.014746	0.134461	7621
(17580550,17590347)(18611861,18621861)(18611861,18621861)	NC_044998.1	18616861	29.0745	29.5798	34.363	44.2653	36.9226	0.070168	-0.287562	-0.398887	-0.482835	0.278578	9797
(17590348,17600203)(18621862,18631862)(18621862,18631862)	NC_044998.1	18626862	21.6462	25.3582	14.7397	38.6106	31.9844	0.687413	0.843672	0.68666	-0.58343	0.49011	9855
(17600204,17610046)(18631863,18641863)(18631863,18641863)	NC_044998.1	18636863	26.3795	28.7685	36.1981	38.0321	33.4003	0.364844	-0.489905	-0.81162	-0.33538	0.274208	9842
(17610047,17619933)(18641864,18651864)(18641864,18651864)	NC_044998.1	18646864	23.9078	26.9934	26.0256	40.5889	33.7912	0.518722	0.07004	-0.19195	-0.542535	0.425113	9886
(17619934,17629531)(18651865,18661865)(18651865,18661865)	NC_044998.1	18656865	28.0011	27.4966	47.9683	29.3071	28.4019	-0.072669	-1.27559	-1.56045	-0.061785	0.014764	9597
(17629532,17639225)(18661866,18671866)(18661866,18671866)	NC_044998.1	18666866	24.702	28.8227	25.6359	33.8195	31.3211	0.670996	0.223608	-0.082102	-0.193059	0.275731	9693
(17639226,17649101)(18671867,18681867)(18671867,18681867)	NC_044998.1	18676867	18.5088	21.5189	21.0663	26.3338	23.9264	0.648884	0.041621	-0.293798	-0.247393	0.299247	9875
(17649102,17658471)(18681868,18691868)(18681868,18691868)	NC_044998.1	18686868	36.4266	45.9744	22.8687	54.0888	50.0316	1.06271	1.11963	0.825573	-0.213335	0.386761	9369
(17658472,17668415)(18691869,18701869)(18691869,18701869)	NC_044998.1	18696869	18.231	24.1902	16.8007	31.1531	27.6716	1.30354	0.689094	0.166603	-0.363135	0.529208	9943
(17668416,17677653)(18701870,18711870)(18701870,18711870)	NC_044998.1	18706870	23.1785	25.2902	23.7866	38.2361	31.7632	0.365879	0.112035	-0.056729	-0.532684	0.38063	9237
(17677654,17687406)(18711871,18721871)(18711871,18721871)	NC_044998.1	18716871	21.1852	26.4593	22.9614	35.2707	30.865	0.997355	0.283589	-0.18015	-0.396252	0.468657	9752
(17687407,17696764)(18721872,18731872)(18721872,18731872)	NC_044998.1	18726872	19.8711	24.8799	12.1956	37.8541	31.367	1.00796	1.09177	0.825971	-0.621528	0.592512	9357
(17696765,17706522)(18731873,18741873)(18731873,18741873)	NC_044998.1	18736873	21.5356	22.0837	22.7733	43.1793	32.6315	0.10201	-0.05505	-0.123637	-0.933429	0.528672	9757
(17706523,17715687)(18741874,18751874)(18741874,18751874)	NC_044998.1	18746874	22.972	26.7344	21.5773	36.1028	31.4186	0.657591	0.3875	0.131211	-0.388903	0.377804	9164
(17715688,17725625)(18751875,18761875)(18751875,18761875)	NC_044998.1	18756875	23.7682	28.1798	22.1961	43.7388	35.9593	0.74587	0.43541	0.143279	-0.624496	0.527391	9937
(17725626,17735409)(18761876,18771876)(18761876,18771876)	NC_044998.1	18766876	24.7656	27.2442	23.5974	38.6723	32.9582	0.402601	0.255268	0.102451	-0.440416	0.340423	9783
(17735410,17745065)(18771877,18781877)(18771877,18781877)	NC_044998.1	18776877	25.7671	28.9736	19.3958	55.3829	42.1782	0.501051	0.645757	0.538402	-0.978609	0.655908	9655
(17745066,17754366)(18781878,18791878)(18781878,18791878)	NC_044998.1	18786878	15.6763	19.6048	13.8641	25.3728	22.4888	0.994143	0.615372	0.242213	-0.349025	0.442249	9300
(17754367,17764001)(18791879,18801879)(18791879,18801879)	NC_044998.1	18796879	22.978	27.8358	16.5621	43.4993	35.6675	0.848814	0.846884	0.603451	-0.650064	0.567438	9634
(17764002,17773340)(18801880,18811880)(18801880,18811880)	NC_044998.1	18806880	14.6353	15.5631	19.0231	22.3178	18.9404	0.250824	-0.394968	-0.624004	-0.437287	0.29872	9338
(17773341,17782962)(18811881,18821881)(18811881,18821881)	NC_044998.1	18816881	17.7007	13.952	27.2879	27.2929	20.6224	-0.843772	-1.27812	-1.14733	-0.716303	0.168556	9621
(17782963,17792623)(18821882,18831882)(18821882,18831882)	NC_044998.1	18826882	14.1025	15.6862	11.2131	28.2548	21.9705	0.443639	0.528176	0.424835	-0.843838	0.565868	9660
(17792624,17802449)(18831883,18841883)(18831883,18841883)	NC_044998.1	18836883	24.3876	31.2938	9.19931	45.8084	38.5511	1.13872	1.56919	1.35133	-0.567943	0.597465	9825
(17802450,17811480)(18841884,18851884)(18841884,18851884)	NC_044998.1	18846884	23.4582	24.9161	25.3294	43.8998	34.408	0.249666	-0.030445	-0.172631	-0.771909	0.479824	9030
(17811481,17821221)(18851885,18861885)(18851885,18861885)	NC_044998.1	18856885	21.4528	21.0401	23.6872	37.7169	29.3785	-0.077089	-0.212098	-0.224011	-0.74072	0.379051	9740
(17821222,17829816)(18861886,18871886)(18861886,18871886)	NC_044998.1	18866886	15.313	16.5267	15.2088	22.3781	19.4524	0.314156	0.144339	0.014216	-0.362328	0.274899	8594
(17829817,17836969)(18871887,18883565)(18871887,18881887)	NC_044998.1	18876887	13.9514	15.213	17.2233	19.7505	17.4818	0.357067	-0.239712	-0.485741	-0.307879	0.256559	7152
(17836969,17842393)(18883565,18891888)(18881888,18891888)	NC_044998.1	18886888	11.6812	13.0238	9.70173	23.2529	18.1384	0.450224	0.465	0.34411	-0.825986	0.55685	5424
(17842394,17852334)(18891889,18901889)(18891889,18901889)	NC_044998.1	18896889	22.2968	28.0058	14.8566	41.2186	34.6122	1.0272	1.01611	0.719664	-0.564912	0.567171	9940
(17852335,17862258)(18901890,18911890)(18901890,18911890)	NC_044998.1	18906890	12.1513	17.1409	7.20406	19.4339	18.2874	1.61152	1.34251	0.830587	-0.178148	0.509473	9923
(17862259,17872048)(18911891,18921891)(18911891,18921891)	NC_044998.1	18916891	16.6851	21.189	14.655	28.2967	24.7429	1.07327	0.661364	0.25641	-0.404489	0.492353	9789
(17872049,17881764)(18921892,18931892)(18921892,18931892)	NC_044998.1	18926892	21.5965	26.3462	13.814	37.1097	31.728	0.881548	0.997873	0.775411	-0.474931	0.481387	9715
(17881765,17891606)(18931893,18941893)(18931893,18941893)	NC_044998.1	18936893	15.8063	18.0273	12.8351	26.9425	22.4849	0.557591	0.552375	0.394172	-0.535096	0.430093	9841
(17891607,17901491)(18941894,18951894)(18941894,18951894)	NC_044998.1	18946894	11.8618	15.6374	6.16273	25.6024	20.6199	1.24777	1.30809	0.97741	-0.792674	0.744232	9884
(17901492,17911405)(18951895,18961895)(18951895,18961895)	NC_044998.1	18956895	9.33159	11.8508	6.17841	22.5881	17.2194	1.04465	0.968733	0.666465	-1.07936	0.843157	9913
(17911406,17921221)(18961896,18971896)(18961896,18971896)	NC_044998.1	18966896	18.0233	21.7404	9.92373	40.451	31.0957	0.822163	1.11372	0.953412	-0.986889	0.741014	9815
(17921222,17930430)(18971897,18981897)(18971897,18981897)	NC_044998.1	18976897	5.31712	6.43303	2.2589	18.5169	12.475	0.777725	1.14801	1.03025	-2.08925	1.29619	9208
(17930431,17940188)(18981898,18991898)(18981898,18991898)	NC_044998.1	18986898	13.2585	16.1174	7.35375	24.9169	20.5172	0.849629	1.09444	0.91746	-0.627663	0.554115	9757
(17940189,17948966)(18991899,19001899)(18991899,19001899)	NC_044998.1	18996899	7.33938	9.03791	3.93493	16.2594	12.6487	0.881327	1.07247	0.881837	-0.916227	0.712265	8777
(17948967,17958771)(19001900,19011900)(19001900,19011900)	NC_044998.1	19006900	7.62521	10.2361	5.19015	13.6375	11.9368	1.30756	1.02644	0.610915	-0.415907	0.557992	9804
(17958772,17968587)(19011901,19021901)(19011901,19021901)	NC_044998.1	19016901	9.44053	12.3062	5.86706	17.9133	15.1098	1.17545	1.08856	0.747798	-0.557316	0.599345	9815
(17968588,17978512)(19021902,19031902)(19021902,19031902)	NC_044998.1	19026902	11.7936	16.6714	4.82254	21.7938	19.2326	1.62089	1.64436	1.20166	-0.409772	0.635655	9924
(17978513,17985609)(19031903,19042943)(19031903,19041903)	NC_044998.1	19036903	11.118	12.9083	6.25942	18.519	15.7137	0.629211	0.972676	0.882091	-0.475475	0.415565	7096
(17985609,17986571)(19042943,19052035)(19041904,19051904)	NC_044998.1	19046904	3.4493	2.11873	4.42672	7.59735	4.85804	-1.36026	-0.893675	-0.459434	-1.42511	0.377376	962
(17986571,17987267)(19052035,19063472)(19051905,19061905)	NC_044998.1	19056905	3.31845	3.59162	2.59855	6.86747	5.22955	0.288751	0.396016	0.348213	-0.88337	0.52979	696
(17987267,17987507)(19063472,19072344)(19061906,19071906)	NC_044998.1	19066906	0.082009	0.038131	0.189265	0.037969	0.03805	-0.543569	-0.545118	-0.450836	0.000694	-0.154752	240
(17987507,17992920)(19072344,19081907)(19071907,19081907)	NC_044998.1	19076907	29.1646	26.3088	13.9445	52.3382	39.3235	-0.395366	0.741149	1.14464	-0.853189	0.359508	5413
(17992921,17997557)(19081908,19091908)(19081908,19091908)	NC_044998.1	19086908	18.3444	24.0168	8.88288	29.0311	26.5239	1.2334	1.4032	1.09585	-0.259916	0.455757	4636
(17997558,18007101)(19091909,19101909)(19091909,19101909)	NC_044998.1	19096909	6.67347	7.62737	2.9827	13.5703	10.5988	0.540385	1.05805	1.03438	-0.826431	0.575713	9543
(18007102,18016462)(19101910,19111910)(19101910,19111910)	NC_044998.1	19106910	1.45668	1.19935	2.50583	3.15018	2.17477	-0.532582	-0.933705	-0.894642	-1.10395	0.398283	9360
(18016463,18026333)(19111911,19121911)(19111911,19121911)	NC_044998.1	19116911	2.7895	2.97836	3.00181	5.60169	4.29002	0.231486	-0.010649	-0.116514	-0.830625	0.484312	9870
(18026334,18036177)(19121912,19131912)(19121912,19131912)	NC_044998.1	19126912	4.31253	4.62537	4.69369	8.0205	6.32294	0.262982	-0.022233	-0.151298	-0.716112	0.440796	9843
(18036178,18046097)(19131913,19141913)(19131913,19141913)	NC_044998.1	19136913	4.54461	6.37969	1.91094	8.03483	7.20726	1.47242	1.39508	1.00387	-0.332224	0.556679	9919
(18046098,18056048)(19141914,19151914)(19141914,19151914)	NC_044998.1	19146914	2.19887	1.58686	2.1981	5.89884	3.74285	-0.914018	-0.329637	0.000498	-1.69557	0.610887	9950
(18056049,18065467)(19151915,19161915)(19151915,19161915)	NC_044998.1	19156915	3.29052	3.78124	3.8726	6.32047	5.05086	0.522495	-0.036667	-0.283311	-0.690131	0.491652	9418
(18065468,18073872)(19161916,19171916)(19161916,19171916)	NC_044998.1	19166916	1.89621	1.62492	1.92655	3.64099	2.63295	-0.456686	-0.180412	-0.02176	-0.905196	0.32988	8404
(18073873,18083729)(19171917,19181917)(19171917,19181917)	NC_044998.1	19176917	2.82311	2.95892	2.45967	7.30642	5.13267	0.164795	0.224717	0.197745	-1.36147	0.737727	9856
(18083730,18093278)(19181918,19191918)(19181918,19191918)	NC_044998.1	19186918	4.62131	4.71418	3.18905	10.062	7.38807	0.073417	0.469803	0.538869	-1.05653	0.569702	9548
(18093279,18097297)(19191919,19201919)(19191919,19201919)	NC_044998.1	19196919	9.71847	11.4387	3.4946	16.88	14.1594	0.686601	1.30919	1.27026	-0.52578	0.456689	4018
(18097298,18106985)(19201920,19211920)(19201920,19211920)	NC_044998.1	19206920	4.64972	4.219	3.95213	10.465	7.34201	-0.338624	0.081805	0.261209	-1.22684	0.551278	9687
(18106986,18116690)(19211921,19221949)(19211921,19221921)	NC_044998.1	19216921	3.02904	2.63256	2.10376	9.66457	6.14857	-0.453184	0.225885	0.478489	-2.06371	0.937083	9704
(18116690,18126305)(19221949,19231922)(19221922,19231922)	NC_044998.1	19226922	8.84456	10.4275	3.31555	16.1413	13.2844	0.690305	1.2728	1.22353	-0.605088	0.499392	9615
(18126306,18135741)(19231923,19241923)(19231923,19241923)	NC_044998.1	19236923	5.32782	4.50295	6.7581	2.85319	3.67807	-0.573844	-0.619217	-0.481059	0.28469	-0.298195	9435
(18135742,18140943)(19241924,19253204)(19241924,19251924)	NC_044998.1	19246924	8.31422	7.1859	5.69349	11.3329	9.25941	-0.52134	0.281811	0.61127	-0.466332	0.112731	5201
(18140943,18141949)(19253204,19262445)(19251925,19261925)	NC_044998.1	19256925	12.6047	15.2569	2.88911	9.90104	12.579	0.827175	1.61674	1.57906	0.401439	-0.002065	1006
(18141949,18144646)(19262445,19272446)(19261926,19271926)	NC_044998.1	19266926	24.2876	30.4994	6.58397	16.1117	23.3055	1.02833	1.70511	1.58119	0.565266	-0.041597	2697
(18144646,18145929)(19272446,19285844)(19271927,19281927)	NC_044998.1	19276927	20.6909	26.1171	3.75084	14.2546	20.1859	1.04992	1.85379	1.75614	0.546043	-0.025022	1283
(18145929,18146155)(19285844,19307618)(19281928,19291928)	NC_044998.1	19286928	0.09011	0.041772	0.185954	0.096015	0.068893	-0.569573	-0.495483	-0.383914	-0.219867	-0.07099	226
(18146155,18146155)(19307618,19307618)(19291929,19301929)	NC_044998.1	19296929	0	0	0	0	0	0					0
(18146155,18150186)(19307618,19311930)(19301930,19311930)	NC_044998.1	19306930	1.2678	1.44602	0.84441	2.01607	1.73105	0.409833	0.470766	0.394357	-0.36341	0.286642	4031
(18150187,18157719)(19311931,19322615)(19311931,19321931)	NC_044998.1	19316931	1.00275	0.357876	3.13642	0.535993	0.446935	-1.76202	-2.52275	-2.29733	-0.138222	-0.411482	7532
(18157719,18158190)(19322615,19332162)(19321932,19331932)	NC_044998.1	19326932	10.7111	13.2854	2.50398	12.8836	13.0845	0.93727	1.63042	1.53942	0.035313	0.222416	471
(18158190,18158230)(19332162,19343615)(19331933,19341933)	NC_044998.1	19336933	1.04226	0.678856	0.093351	4.24289	2.46087	-0.965578	0.51893	0.997913	-2.67871	1.02014	40
(18158230,18158237)(19343615,19352209)(19341934,19351934)	NC_044998.1	19346934	0.177552	0.083283	0.001281	1.17915	0.631216	-0.767045	0.198047	0.497235	-2.96496	1.04053	7
(18158237,18158285)(19352209,19367298)(19351935,19361935)	NC_044998.1	19356935	0.027914	0.014174	0.010377	0.097658	0.055916	-0.297783	0.023677	0.127276	-0.640503	0.173347	48
(18158285,18158418)(19367298,19372445)(19361936,19371936)	NC_044998.1	19366936	3.25962	3.71241	0.589648	2.32883	3.02062	0.486037	1.26229	1.3086	0.379353	-0.067311	133
(18158418,18158659)(19372445,19382343)(19371937,19381937)	NC_044998.1	19376937	2.75187	3.08447	0.373417	6.69561	4.89004	0.412361	1.24348	1.31803	-1.15775	0.698294	241
(18158659,18168129)(19382343,19391938)(19381938,19391938)	NC_044998.1	19386938	4.31236	4.60874	2.40399	8.10705	6.3579	0.249149	0.717587	0.757551	-0.737903	0.448513	9470
(18168130,18172868)(19391939,19401939)(19391939,19401939)	NC_044998.1	19396939	1.28191	1.61319	1.35268	2.44665	2.02992	0.755495	0.202398	-0.065455	-0.52635	0.458864	4738
(18172869,18180951)(19401940,19411940)(19401940,19411940)	NC_044998.1	19406940	18.4118	20.0171	9.56897	30.4615	25.2393	0.347822	0.965449	1.02076	-0.539429	0.379065	8082
(18180952,18189689)(19411941,19421941)(19411941,19421941)	NC_044998.1	19416941	1.12144	0.899921	0.997298	4.57052	2.73522	-0.557964	-0.082415	0.124816	-2.59541	1.0977	8737
(18189690,18196633)(19421942,19433345)(19421942,19431942)	NC_044998.1	19426942	5.51799	6.41516	1.88686	10.6395	8.52735	0.604633	1.20819	1.18756	-0.70497	0.526638	6943
(18196633,18200995)(19433345,19441943)(19431943,19441943)	NC_044998.1	19436943	4.3697	4.48086	2.47178	7.65441	6.06763	0.092355	0.647094	0.745763	-0.661098	0.367867	4362
(18200996,18209692)(19441944,19452105)(19441944,19451944)	NC_044998.1	19446944	2.50449	2.65658	1.65872	7.61203	5.1343	0.204042	0.490263	0.501058	-1.73173	0.931497	8696
(18209692,18218726)(19452105,19461945)(19451945,19461945)	NC_044998.1	19456945	4.41489	3.88985	4.75485	4.04303	3.96644	-0.432269	-0.276337	-0.132525	-0.031601	-0.096256	9034
(18218727,18228594)(19461946,19471946)(19461946,19471946)	NC_044998.1	19466946	2.98393	2.97255	2.64988	6.89369	4.93312	-0.013173	0.139383	0.174634	-1.16682	0.593263	9867
(18228595,18238516)(19471947,19481947)(19471947,19481947)	NC_044998.1	19476947	3.16344	4.05205	1.51086	6.46812	5.26009	0.978709	1.0507	0.827952	-0.681117	0.606272	9921
(18238517,18247800)(19481948,19491948)(19481948,19491948)	NC_044998.1	19486948	4.22498	3.94237	2.66302	10.2736	7.10799	-0.241923	0.423187	0.629883	-1.36151	0.643962	9283
(18247801,18256562)(19491949,19501949)(19491949,19501949)	NC_044998.1	19496949	5.68034	5.66317	3.68553	11.2572	8.46017	-0.011271	0.515217	0.637395	-0.908007	0.47361	8761
(18256563,18266067)(19501950,19511950)(19501950,19511950)	NC_044998.1	19506950	2.84767	2.40809	2.87358	6.91941	4.66375	-0.529486	-0.208179	-0.014007	-1.40156	0.575744	9504
(18266068,18275995)(19511951,19521951)(19511951,19521951)	NC_044998.1	19516951	1.61383	2.04668	1.23141	3.28099	2.66384	0.827613	0.544226	0.305161	-0.638921	0.536425	9927
(18275996,18285898)(19521952,19531952)(19521952,19531952)	NC_044998.1	19526952	2.3416	2.28521	2.67455	5.19644	3.74082	-0.079988	-0.200777	-0.206746	-1.08149	0.524898	9902
(18285899,18295783)(19531953,19541953)(19531953,19541953)	NC_044998.1	19536953	4.72699	4.63683	4.37504	10.2361	7.43649	-0.069845	0.079195	0.130101	-1.08276	0.546525	9884
(18295784,18304497)(19541954,19552910)(19541954,19551954)	NC_044998.1	19546954	4.30034	3.64241	1.97908	14.2354	8.9389	-0.554464	0.542566	0.923433	-2.24029	1.01965	8713
(18304497,18312629)(19552910,19561955)(19551955,19561955)	NC_044998.1	19556955	5.96584	6.39895	3.14177	8.35535	7.37715	0.271899	0.814851	0.867346	-0.302989	0.22977	8132
(18312630,18322201)(19561956,19571956)(19561956,19571956)	NC_044998.1	19566956	2.9085	3.24033	2.81016	2.98961	3.11497	0.392613	0.189397	0.05237	0.076393	0.064262	9571
(18322202,18332046)(19571957,19581957)(19571957,19581957)	NC_044998.1	19576957	2.04559	2.03102	2.18237	2.98865	2.50984	-0.023075	-0.085877	-0.093199	-0.401827	0.195168	9844
(18332047,18341929)(19581958,19591958)(19581958,19591958)	NC_044998.1	19586958	17.5064	12.9998	15.5348	15.8081	14.404	-1.02523	-0.245452	0.23834	-0.152434	-0.180917	9882
(18341930,18351824)(19591959,19601959)(19591959,19601959)	NC_044998.1	19596959	6.30367	6.04062	3.24266	10.4611	8.25088	-0.15703	0.668588	0.898932	-0.649363	0.301188	9894
(18351825,18361585)(19601960,19611960)(19601960,19611960)	NC_044998.1	19606960	7.42677	8.12661	2.93156	20.8412	14.4839	0.35917	1.08086	1.15293	-1.59482	0.93627	9760
(18361586,18370071)(19611961,19621961)(19611961,19621961)	NC_044998.1	19616961	3.34003	3.91887	2.78096	8.05033	5.9846	0.608443	0.451549	0.269131	-1.10739	0.728928	8485
(18370072,18379284)(19621962,19631962)(19621962,19631962)	NC_044998.1	19626962	3.16415	3.4115	2.36339	7.64476	5.52813	0.272377	0.433289	0.401123	-1.19315	0.683439	9212
(18379285,18389124)(19631963,19641963)(19631963,19641963)	NC_044998.1	19636963	3.43149	3.73109	3.30697	5.75468	4.74289	0.307656	0.164873	0.058757	-0.528925	0.352915	9839
(18389125,18396154)(19641964,19651964)(19641964,19651964)	NC_044998.1	19646964	1.46291	1.02183	1.53045	4.32596	2.6739	-0.909916	-0.362473	-0.057431	-1.86288	0.669387	7029
(18396155,18405435)(19651965,19661965)(19651965,19661965)	NC_044998.1	19656965	3.42918	2.7783	3.17523	10.3942	6.58625	-0.668775	-0.154383	0.119884	-1.99189	0.850124	9280
(18405436,18415126)(19661966,19671966)(19661966,19671966)	NC_044998.1	19666966	2.94028	1.85137	3.76722	5.21153	3.53145	-1.27654	-0.836729	-0.436947	-1.01358	0.182262	9690
(18415127,18423991)(19671967,19681967)(19671967,19681967)	NC_044998.1	19676967	4.25721	4.333	3.2274	6.72336	5.52818	0.064444	0.363523	0.412864	-0.510368	0.281946	8864
(18423992,18433719)(19681968,19691968)(19681968,19691968)	NC_044998.1	19686968	3.91328	3.37711	3.58215	6.70278	5.03995	-0.491033	-0.072024	0.141575	-0.768686	0.269653	9727
(18433720,18443612)(19691969,19701969)(19691969,19701969)	NC_044998.1	19696969	4.5285	4.42441	4.80062	7.90621	6.16531	-0.083779	-0.117781	-0.104013	-0.701228	0.343315	9892
(18443613,18453526)(19701970,19711970)(19701970,19711970)	NC_044998.1	19706970	7.65277	10.012	2.83858	22.6603	16.3361	1.17756	1.45471	1.20415	-1.5412	1.11997	9913
(18453527,18463420)(19711971,19721971)(19711971,19721971)	NC_044998.1	19716971	7.19944	8.6205	2.02053	16.9347	12.7776	0.750608	1.41	1.36315	-1.07465	0.76199	9893
(18463421,18473293)(19721972,19731972)(19721972,19731972)	NC_044998.1	19726972	7.71815	9.20039	3.09663	12.7006	10.9505	0.73402	1.22881	1.14774	-0.423	0.413572	9872
(18473294,18483156)(19731973,19741973)(19731973,19741973)	NC_044998.1	19736973	5.31715	6.42515	2.18512	9.64101	8.03308	0.772204	1.16613	1.05511	-0.556005	0.491815	9862
(18483157,18493105)(19741974,19751974)(19741974,19751974)	NC_044998.1	19746974	7.79787	10.7194	1.73828	21.1661	15.9427	1.433	1.79221	1.49195	-1.25	1.03208	9948
(18493106,18499456)(19751975,19761975)(19751975,19761975)	NC_044998.1	19756975	9.50349	10.7796	2.9347	17.619	14.1993	0.520174	1.3185	1.36677	-0.675426	0.493307	6350
(18499457,18509211)(19761976,19771976)(19761976,19771976)	NC_044998.1	19766976	7.87213	9.60571	4.60761	17.4814	13.5436	0.842854	0.989302	0.797387	-0.933768	0.71226	9754
(18509212,18515038)(19771977,19781977)(19771977,19781977)	NC_044998.1	19776977	5.54233	6.49395	4.50022	8.5248	7.50938	0.638788	0.530028	0.339622	-0.337488	0.34284	5826
(18515039,18521049)(19781978,19791979)(19781978,19791978)	NC_044998.1	19786978	4.74421	6.21725	0.735596	12.0219	9.11956	1.13744	1.65342	1.47759	-1.11859	0.879617	6010
(18521049,18530374)(19791979,19801979)(19791979,19801979)	NC_044998.1	19796979	11.734	14.2047	3.87787	16.6385	15.4216	0.824977	1.43965	1.36029	-0.195661	0.316638	9325
(18530375,18532716)(19801980,19812611)(19801980,19811980)	NC_044998.1	19806980	5.24056	7.22368	1.11389	13.6065	10.4151	1.40034	1.70037	1.40632	-1.11893	0.949629	2341
(18532716,18538975)(19812611,19821981)(19811981,19821981)	NC_044998.1	19816981	5.44063	6.58491	3.36798	7.56095	7.07293	0.781105	0.868296	0.685558	-0.165093	0.289399	6259
(18538976,18547211)(19821982,19831982)(19821982,19831982)	NC_044998.1	19826982	6.3186	6.52407	2.90718	11.831	9.17755	0.122385	0.862567	0.9999	-0.777812	0.441242	8235
(18547212,18555939)(19831983,19841983)(19831983,19841983)	NC_044998.1	19836983	5.09338	5.94374	1.74825	16.6006	11.2722	0.616078	1.19498	1.16602	-1.91958	1.164	8727
(18555940,18558406)(19841984,19851984)(19841984,19851984)	NC_044998.1	19846984	0.976099	1.44456	0.320655	2.26317	1.85386	1.30503	1.03766	0.717343	-0.649508	0.663062	2466
(18558407,18567986)(19851985,19861985)(19851985,19861985)	NC_044998.1	19856985	2.5822	2.13596	2.08491	8.3793	5.25763	-0.583599	0.024532	0.288333	-2.12179	0.923109	9579
(18567987,18577585)(19861986,19871986)(19861986,19871986)	NC_044998.1	19866986	7.94558	10.8913	1.56013	14.3965	12.6439	1.41986	1.83228	1.54755	-0.411867	0.584898	9598
(18577586,18584654)(19871987,19881987)(19871987,19881987)	NC_044998.1	19876987	10.9079	11.9626	5.69887	18.2315	15.097	0.377445	0.932032	0.961646	-0.541242	0.385793	7068
(18584655,18589481)(19881988,19891988)(19881988,19891988)	NC_044998.1	19886988	2.69694	3.29435	2.27569	4.56594	3.93015	0.753358	0.474201	0.23682	-0.415287	0.409837	4826
(18589482,18599365)(19891989,19901989)(19891989,19901989)	NC_044998.1	19896989	6.20924	6.82325	4.34511	13.6475	10.2354	0.371629	0.599674	0.554222	-1.0171	0.631563	9883
(18599366,18607711)(19901990,19911990)(19901990,19911990)	NC_044998.1	19906990	7.4109	7.97273	5.17568	13.7514	10.8621	0.288914	0.583006	0.574313	-0.72633	0.458788	8345
(18607712,18616549)(19911991,19922032)(19911991,19921991)	NC_044998.1	19916991	5.38583	7.4031	1.02672	10.8142	9.10864	1.3897	1.7354	1.45354	-0.582579	0.666226	8837
(18616549,18616749)(19922032,19933277)(19921992,19931992)	NC_044998.1	19926992	0.061161	0.028192	0.152693	0.002654	0.015423	-0.476629	-0.521709	-0.446764	0.128649	-0.188269	200
(18616749,18624910)(19933277,19941993)(19931993,19941993)	NC_044998.1	19936993	2.91611	3.61091	1.91849	7.03537	5.32314	0.820239	0.743699	0.53029	-1.04087	0.747466	8161
(18624911,18634702)(19941994,19951994)(19941994,19951994)	NC_044998.1	19946994	8.15571	11.109	3.64762	15.5301	13.3195	1.3893	1.43255	1.06876	-0.506516	0.627193	9791
(18634703,18644056)(19951995,19961995)(19951995,19961995)	NC_044998.1	19956995	5.26017	6.99425	1.86125	13.8156	10.4049	1.22036	1.42419	1.15488	-1.19155	0.940926	9353
(18644057,18652872)(19961996,19971996)(19961996,19971996)	NC_044998.1	19966996	8.58023	9.5963	3.99852	19.5821	14.5892	0.455859	1.02858	1.04046	-1.08912	0.69562	8815
(18652873,18660676)(19971997,19981997)(19971997,19981997)	NC_044998.1	19976997	5.67739	7.07896	3.12218	13.5639	10.3214	0.920475	1.03127	0.816798	-1.05315	0.791603	7803
(18660677,18670590)(19981998,19991998)(19981998,19991998)	NC_044998.1	19986998	6.48942	8.25122	3.41481	12.3005	10.2759	1.02405	1.12793	0.881721	-0.578461	0.570037	9913
(18670591,18680501)(19991999,20001999)(19991999,20001999)	NC_044998.1	19996999	8.34054	11.9885	1.94687	14.6298	13.3092	1.68058	1.89098	1.4873	-0.296109	0.590828	9910
[truncated: 101,703 more rows]

## Sheet: WBMWinThetas
(indexStart,indexStop)(firstPos_withData,lastPos_withData)(WinStart,WinStop)	RefSeq	midPos	tW	tP	tF	tH	tL	Tajima	fuf	fud	fayh	zeng	nSites
(575,1713)(11483,21209)(10001,20001)	NC_044998.1	15001	0.187163	0.073728	0.45589	0.247653	0.160691	-0.896008	-0.89765	-0.737399	-0.455285	-0.058897	1138
(1713,10359)(21209,30002)(20002,30002)	NC_044998.1	25002	29.6909	28.5659	12.1609	29.9606	29.2633	-0.153045	0.966748	1.29627	-0.044912	-0.014871	8646
(10360,19808)(30003,40003)(30003,40003)	NC_044998.1	35003	22.7317	23.7164	15.0205	31.7372	27.7268	0.173874	0.65989	0.732585	-0.336444	0.225736	9448
(19809,29643)(40004,50004)(40004,50004)	NC_044998.1	45004	20.5511	21.9567	11.4035	31.9765	26.9666	0.273765	0.880252	0.954285	-0.464315	0.31997	9834
(29644,39585)(50005,60005)(50005,60005)	NC_044998.1	55005	14.3757	16.5227	7.68604	21.1831	18.8529	0.59048	1.02534	0.966789	-0.307056	0.316087	9941
(39586,49520)(60006,70006)(60006,70006)	NC_044998.1	65006	11.4325	11.1895	7.16977	12.1886	11.6891	-0.083182	0.573587	0.7552	-0.082395	0.022585	9934
(49521,59379)(70007,80007)(70007,80007)	NC_044998.1	75007	32.8546	29.7357	32.858	28.3188	29.0273	-0.384187	-0.167039	-0.000227	0.041269	-0.120458	9858
(59380,69177)(80008,90008)(80008,90008)	NC_044998.1	85008	31.076	30.5705	21.7655	33.3629	31.9667	-0.06576	0.496797	0.659397	-0.085949	0.029614	9797
(69178,79065)(90009,100009)(90009,100009)	NC_044998.1	95009	22.8087	20.5974	22.3942	28.6553	24.6263	-0.389179	-0.135923	0.039247	-0.336871	0.081872	9887
(79066,88816)(100010,110010)(100010,110010)	NC_044998.1	105010	28.5858	35.105	10.8405	49.3257	42.2153	0.920403	1.4825	1.36004	-0.475475	0.491933	9750
(88817,98686)(110011,120011)(110011,120011)	NC_044998.1	115011	28.9018	29.3269	12.3114	30.127	29.7269	0.059369	1.02878	1.2584	-0.026463	0.029461	9869
(98687,107291)(120012,130012)(120012,130012)	NC_044998.1	125012	22.1792	22.5892	10.2652	15.5892	19.0892	0.074134	0.957079	1.15807	0.30085	-0.143049	8604
(107292,117138)(130013,140013)(130013,140013)	NC_044998.1	135013	28.0931	29.6701	14.0095	29.1907	29.4304	0.226469	0.972771	1.09724	0.016306	0.049101	9846
(117139,127022)(140014,150014)(140014,150014)	NC_044998.1	145014	25.6034	23.8886	25.1752	30.1211	27.0049	-0.269636	-0.087272	0.0364	-0.23241	0.056364	9883
(127023,135525)(150015,160015)(150015,160015)	NC_044998.1	155015	27.4458	29.6315	14.7876	29.1478	29.3896	0.321112	0.942688	1.00808	0.016837	0.073021	8502
(135526,145419)(160016,170016)(160016,170016)	NC_044998.1	165016	27.9217	29.3318	16.5705	31.3752	30.3535	0.203715	0.797304	0.889476	-0.069931	0.089822	9893
(145420,155265)(170017,180017)(170017,180017)	NC_044998.1	175017	21.1654	21.4075	15.0532	29.3281	25.3678	0.045809	0.515604	0.62048	-0.356523	0.203646	9845
(155266,165151)(180018,190018)(180018,190018)	NC_044998.1	185018	36.2053	42.6107	13.9712	47.6724	45.1415	0.717223	1.39593	1.36178	-0.133883	0.255568	9885
(165152,174750)(190019,200019)(190019,200019)	NC_044998.1	195019	25.4046	30.1678	12.261	46.2446	38.2062	0.754684	1.22361	1.12554	-0.604143	0.518807	9598
(174751,184549)(200020,210020)(200020,210020)	NC_044998.1	205020	30.0456	31.7631	27.8033	37.3474	34.5553	0.230944	0.230728	0.163958	-0.177721	0.154987	9798
(184550,194412)(210021,220021)(210021,220021)	NC_044998.1	215021	33.6218	39.8402	10.5992	44.9107	42.3754	0.748823	1.53016	1.51311	-0.144341	0.269307	9862
(194413,203806)(220022,230022)(220022,230022)	NC_044998.1	225022	41.2552	43.4536	23.635	57.2759	50.3648	0.216486	0.851854	0.952453	-0.321139	0.229015	9393
(203807,213253)(230023,240023)(230023,240023)	NC_044998.1	235023	39.7351	41.8077	26.3508	51.5765	46.6921	0.211777	0.688873	0.749993	-0.235586	0.181506	9446
(213254,223113)(240024,250024)(240024,250024)	NC_044998.1	245024	37.4718	44.63	21.8111	44.8151	44.7225	0.774873	1.07607	0.928201	-0.004731	0.200447	9859
(223114,232947)(250025,260025)(250025,260025)	NC_044998.1	255025	37.3676	39.0233	18.6044	38.986	39.0046	0.179715	0.965467	1.11504	0.000954	0.04538	9833
(232948,241797)(260026,270026)(260026,270026)	NC_044998.1	265026	35.02	42.6307	11.7033	52.6855	47.6581	0.880529	1.5564	1.47414	-0.274886	0.373503	8849
(241798,251709)(270027,280027)(270027,280027)	NC_044998.1	275027	37.667	42.8993	18.115	52.681	47.7902	0.563517	1.16292	1.15309	-0.248761	0.278428	9911
(251710,261387)(280028,290028)(280028,290028)	NC_044998.1	285028	39.9869	42.8934	18.1915	49.4705	46.1819	0.295141	1.09421	1.21394	-0.157622	0.160621	9677
(261388,271033)(290029,300029)(290029,300029)	NC_044998.1	295029	45.6604	48.2305	32.2473	59.2016	53.716	0.228988	0.622807	0.657674	-0.230449	0.183189	9645
(271034,280837)(300030,310030)(300030,310030)	NC_044998.1	305030	33.2613	36.4979	9.94041	41.6736	39.0858	0.393899	1.40416	1.5485	-0.14892	0.181103	9803
(280838,290729)(310031,320031)(310031,320031)	NC_044998.1	315031	22.2672	22.9045	9.64642	28.7188	25.8117	0.114819	1.02581	1.22226	-0.248916	0.163449	9891
(290730,300605)(320032,330032)(320032,330032)	NC_044998.1	325032	26.7608	30.0322	15.0238	32.1892	31.1107	0.492656	0.976271	0.9572	-0.07699	0.167516	9875
(300606,308187)(330033,340033)(330033,340033)	NC_044998.1	335033	29.6537	33.3986	14.3072	40.7082	37.0534	0.510074	1.12641	1.13615	-0.235678	0.257619	7581
(308188,317905)(340034,350034)(340034,350034)	NC_044998.1	345034	31.6095	35.9433	14.2809	29.3598	32.6516	0.554461	1.20253	1.20762	0.199242	0.034068	9717
(317906,327416)(350035,360283)(350035,360035)	NC_044998.1	355035	31.9994	36.1061	16.7382	40.8355	38.4708	0.51912	1.06263	1.05125	-0.141401	0.209033	9510
(327416,336681)(360283,370037)(360036,370036)	NC_044998.1	365036	43.0688	44.1092	25.9544	67.3577	55.7335	0.098196	0.748572	0.887675	-0.51754	0.305135	9265
(336681,346544)(370037,380037)(370037,380037)	NC_044998.1	375037	46.8403	51.8916	26.6655	61.2424	56.567	0.438878	0.958977	0.965201	-0.191495	0.215677	9863
(346545,354909)(380038,390038)(380038,390038)	NC_044998.1	385038	34.1664	39.8072	15.6593	60.5686	50.1879	0.668633	1.24433	1.19788	-0.581659	0.485156	8364
(354910,362606)(390039,400039)(390039,400039)	NC_044998.1	395039	37.4391	40.1169	21.0298	53.9188	47.0178	0.290128	0.900845	0.97338	-0.353119	0.265036	7696
(362607,371877)(400040,410040)(400040,410040)	NC_044998.1	405040	34.2008	34.4541	29.7876	40.9848	37.7195	0.029984	0.240226	0.285374	-0.182787	0.106443	9270
(371878,380952)(410041,420041)(410041,420041)	NC_044998.1	415041	52.2109	54.7847	30.1654	55.0826	54.9337	0.200896	0.842321	0.949748	-0.005477	0.054223	9074
(380953,389134)(420042,430049)(420042,430042)	NC_044998.1	425042	40.8003	40.7351	25.2465	49.6016	45.1684	-0.006489	0.6729	0.849743	-0.208281	0.111023	8181
(389134,397911)(430049,440043)(430043,440043)	NC_044998.1	435043	32.0764	37.3615	9.01013	39.0475	38.2045	0.666517	1.55194	1.58527	-0.050288	0.197478	8777
(397912,407803)(440044,450044)(440044,450044)	NC_044998.1	445044	33.1979	40.3642	9.74205	54.9403	47.6523	0.873788	1.62203	1.56029	-0.42019	0.450284	9891
(407804,417040)(450045,460045)(450045,460045)	NC_044998.1	455045	41.0213	45.9108	19.5049	63.3145	54.6127	0.48418	1.14123	1.16942	-0.406638	0.343611	9236
(417041,426417)(460046,470046)(460046,470046)	NC_044998.1	465046	31.9274	34.0415	21.5524	31.3132	32.6773	0.267828	0.686697	0.7162	0.081754	0.024276	9376
(426418,436241)(470047,480047)(470047,480047)	NC_044998.1	475047	35.6416	34.0808	30.9583	43.0996	38.5902	-0.177487	0.154506	0.291167	-0.242298	0.085644	9823
(436242,442931)(480048,490048)(480048,490048)	NC_044998.1	485048	28.3839	25.4008	18.6158	29.2513	27.326	-0.424105	0.417349	0.753674	-0.129649	-0.038451	6689
(442932,452797)(490049,500049)(490049,500049)	NC_044998.1	495049	49.5419	47.664	39.6317	76.0885	61.8762	-0.154373	0.289187	0.449154	-0.550531	0.258733	9865
(452798,462608)(500050,510050)(500050,510050)	NC_044998.1	505050	45.3778	50.4748	29.4133	56.5392	53.507	0.45693	0.825642	0.787468	-0.128171	0.186002	9810
(462609,466074)(510051,523782)(510051,520051)	NC_044998.1	515051	20.074	20.8182	15.3477	16.1528	18.4855	0.148297	0.466422	0.503863	0.221267	-0.081063	3465
(466074,472281)(523782,530052)(520052,530052)	NC_044998.1	525052	26.2222	29.537	8.93137	37.4838	33.5104	0.509191	1.36644	1.43733	-0.289413	0.286324	6207
(472282,477896)(530053,540053)(530053,540053)	NC_044998.1	535053	28.6418	33.0277	11.5515	42.5382	37.7829	0.618029	1.3097	1.30742	-0.31737	0.329297	5614
(477897,487633)(540054,550054)(540054,550054)	NC_044998.1	545054	42.6586	43.3683	23.3077	65.2866	54.3274	0.067622	0.834842	1.01295	-0.49259	0.283816	9736
(487634,497184)(550055,560055)(550055,560055)	NC_044998.1	555055	55.5688	64.9848	21.9997	60.6902	62.8375	0.691039	1.38415	1.3615	0.074201	0.136083	9550
(497185,507007)(560056,570056)(560056,570056)	NC_044998.1	565056	47.2586	53.6831	17.119	70.1407	61.9119	0.553309	1.37807	1.42963	-0.334069	0.322072	9822
(507008,516793)(570057,580057)(570057,580057)	NC_044998.1	575057	37.5034	44.7544	13.4299	48.3106	46.5325	0.784271	1.47596	1.42567	-0.090831	0.249404	9785
(516794,524935)(580058,591640)(580058,590058)	NC_044998.1	585058	40.2168	49.8058	10.4491	68.9697	59.3878	0.968244	1.73376	1.64889	-0.456664	0.49425	8141
(524935,532587)(591640,600059)(590059,600059)	NC_044998.1	595059	30.2698	32.3877	17.5457	49.8236	41.1057	0.282722	0.858694	0.923867	-0.550827	0.369692	7652
(532588,541104)(600060,610060)(600060,610060)	NC_044998.1	605060	43.8355	48.9009	22.1905	61.8631	55.382	0.469846	1.08272	1.10379	-0.283537	0.273382	8516
(541105,550750)(610061,620061)(610061,620061)	NC_044998.1	615061	34.9161	37.5713	24.7737	62.2035	49.8874	0.308096	0.645873	0.643047	-0.675404	0.443758	9645
(550751,559841)(620062,630062)(620062,630062)	NC_044998.1	625062	56.8535	75.0488	10.8085	84.4663	79.7576	1.3055	2.02305	1.82658	-0.159052	0.419197	9090
(559842,569134)(630063,640063)(630063,640063)	NC_044998.1	635063	57.5478	67.3416	19.5497	98.7847	83.0631	0.694315	1.48736	1.48972	-0.524667	0.461404	9292
(569135,578884)(640064,650064)(640064,650064)	NC_044998.1	645064	44.6851	53.4061	13.5545	66.4022	59.9041	0.793763	1.58568	1.55846	-0.278906	0.353562	9749
(578885,586903)(650065,660375)(650065,660065)	NC_044998.1	655065	30.0345	32.4576	11.2215	32.2415	32.3496	0.325943	1.2378	1.37608	0.006879	0.079595	8018
(586903,595467)(660375,670066)(660066,670066)	NC_044998.1	665066	44.8251	50.3048	15.9041	68.6551	59.48	0.497209	1.36465	1.44349	-0.392589	0.339402	8564
(595468,605273)(670067,680067)(670067,680067)	NC_044998.1	675067	37.2511	40.0237	23.0947	43.4056	41.7146	0.301882	0.802862	0.843785	-0.086961	0.124118	9805
(605274,614501)(680068,690344)(680068,690068)	NC_044998.1	685068	37.2825	37.4563	27.8517	36.4336	36.9449	0.018907	0.455133	0.561667	0.026274	-0.009378	9227
(614501,622692)(690344,700524)(690069,700069)	NC_044998.1	695069	31.4204	31.2298	18.4792	37.062	34.1459	-0.024522	0.711885	0.90701	-0.177559	0.089636	8191
(622692,631855)(700524,710070)(700070,710070)	NC_044998.1	705070	31.947	35.4413	16.0036	44.098	39.7696	0.442415	1.06813	1.09995	-0.25924	0.253087	9163
(631856,640517)(710071,720071)(710071,720071)	NC_044998.1	715071	38.0063	40.3787	27.0294	48.3187	44.3487	0.253258	0.620989	0.641845	-0.200134	0.172903	8661
(640518,650213)(720072,730072)(720072,730072)	NC_044998.1	725072	42.1809	46.8787	18.419	64.6098	55.7442	0.452595	1.19733	1.25737	-0.402973	0.333588	9695
(650214,659017)(730073,740073)(730073,740073)	NC_044998.1	735073	46.3576	54.6721	26.9055	73.6368	64.1544	0.729822	1.06621	0.939963	-0.392398	0.398689	8803
(659018,668821)(740074,750074)(740074,750074)	NC_044998.1	745074	46.323	50.3674	30.4184	55.2844	52.8259	0.355268	0.766571	0.76909	-0.101813	0.145787	9803
(668822,676888)(750075,760075)(750075,760075)	NC_044998.1	755075	39.06	43.078	22.1255	52.2627	47.6703	0.417543	0.949346	0.964628	-0.225305	0.228478	8066
(676889,686559)(760076,770076)(760076,770076)	NC_044998.1	765076	44.7726	52.942	16.4914	77.7184	65.3302	0.742127	1.44761	1.41315	-0.530687	0.476662	9670
(686560,695534)(770077,780100)(770077,780077)	NC_044998.1	775077	32.5072	33.7768	19.5267	35.2195	34.4982	0.158037	0.770158	0.880884	-0.042466	0.063323	8974
(695534,704850)(780100,790504)(780078,790078)	NC_044998.1	785078	43.9401	47.8006	18.862	70.5028	59.1517	0.357239	1.17033	1.27593	-0.495418	0.359312	9316
(704850,713905)(790504,800079)(790079,800079)	NC_044998.1	795079	28.7048	31.4017	20.0305	38.6663	35.034	0.379217	0.692012	0.662216	-0.241897	0.22751	9055
(713906,723554)(800080,810080)(800080,810080)	NC_044998.1	805080	45.4162	51.4178	19.2605	73.1239	62.2709	0.537575	1.25958	1.28912	-0.458375	0.385324	9648
(723555,733086)(810081,820081)(810081,820081)	NC_044998.1	815081	36.7663	41.1513	17.4447	50.3963	45.7738	0.48363	1.13855	1.16616	-0.240829	0.253728	9531
(733087,741993)(820082,830082)(820082,830082)	NC_044998.1	825082	44.6634	48.7525	22.9301	74.9791	61.8658	0.372354	1.02794	1.08852	-0.563116	0.39983	8906
(741994,750843)(830083,840083)(830083,840083)	NC_044998.1	835083	47.0598	55.4958	9.12626	70.3503	62.923	0.72958	1.75478	1.80665	-0.302795	0.350124	8849
(750844,760526)(840084,850084)(840084,850084)	NC_044998.1	845084	55.825	63.098	27.8924	77.1303	70.1141	0.531341	1.12858	1.12786	-0.241337	0.2663	9682
(760527,769592)(850085,860085)(850085,860085)	NC_044998.1	855085	45.7798	52.0868	16.923	63.1423	57.6145	0.560501	1.36675	1.41136	-0.231618	0.268434	9065
(769593,777268)(860086,870086)(860086,870086)	NC_044998.1	865086	44.3412	53.944	15.9594	61.5481	57.7461	0.880713	1.52273	1.43145	-0.164448	0.313806	7675
(777269,786767)(870087,880106)(870087,880087)	NC_044998.1	875087	61.5664	73.8432	11.7192	91.1681	82.5057	0.814102	1.81021	1.83028	-0.270299	0.354133	9498
(786767,794830)(880106,890088)(880088,890088)	NC_044998.1	885088	48.3857	54.953	17.3752	70.8889	62.921	0.552615	1.38428	1.43788	-0.315984	0.312114	8063
(794831,804270)(890089,900089)(890089,900089)	NC_044998.1	895089	48.4267	54.55	31.7549	67.0725	60.8113	0.51482	0.839025	0.772394	-0.248092	0.265709	9439
(804271,813945)(900090,910090)(900090,910090)	NC_044998.1	905090	51.2359	53.6106	29.9092	77.8477	65.7292	0.188838	0.825909	0.935684	-0.453987	0.294063	9674
(813946,822987)(910091,920091)(910091,920091)	NC_044998.1	915091	47.1905	51.663	19.2215	67.3872	59.5251	0.385746	1.2244	1.32852	-0.319637	0.271495	9041
(822988,832857)(920092,930092)(920092,930092)	NC_044998.1	925092	49.4531	50.1157	43.6939	66.8307	58.4732	0.054569	0.231608	0.261473	-0.324317	0.189548	9869
(832858,841856)(930093,940093)(930093,940093)	NC_044998.1	935093	36.9154	42.6936	14.3201	55.8667	49.2802	0.634772	1.35739	1.35848	-0.341778	0.346912	8998
(841857,851748)(940094,950094)(940094,950094)	NC_044998.1	945094	45.116	48.2121	29.1604	70.7592	59.4857	0.279149	0.751052	0.791425	-0.479283	0.330676	9891
(851749,861479)(950095,960095)(950095,960095)	NC_044998.1	955095	36.9691	38.6141	20.2707	54.5618	46.5879	0.180451	0.876323	1.00255	-0.41317	0.269484	9730
(861480,871142)(960096,970098)(960096,970096)	NC_044998.1	965096	51.26	54.121	24.7977	75.9735	65.0473	0.227401	1.02134	1.16047	-0.409132	0.279609	9662
(871142,880871)(970098,980097)(970097,980097)	NC_044998.1	975097	44.3011	47.3085	30.4459	61.4573	54.3829	0.27606	0.676581	0.699404	-0.30626	0.236222	9729
(880872,890499)(980098,990098)(980098,990098)	NC_044998.1	985098	49.9812	52.3666	34.5383	81.3691	66.8679	0.194393	0.636396	0.69397	-0.556816	0.351142	9627
(890500,900232)(990099,1000099)(990099,1000099)	NC_044998.1	995099	37.0031	42.7179	21.5245	49.6342	46.1761	0.626337	1.01159	0.928505	-0.179023	0.256759	9732
(900233,910074)(1000100,1010100)(1000100,1010100)	NC_044998.1	1005100	43.6262	44.1028	28.6215	73.0596	58.5812	0.044418	0.630453	0.768694	-0.636428	0.355766	9841
(910075,918830)(1010101,1020101)(1010101,1020101)	NC_044998.1	1015101	44.5034	51.0679	11.479	53.3318	52.1999	0.599894	1.58145	1.65976	-0.048782	0.179524	8755
(918831,927384)(1020102,1030102)(1020102,1030102)	NC_044998.1	1025102	47.6035	54.8007	24.2434	72.2434	63.5221	0.615433	1.14359	1.10031	-0.351512	0.347374	8553
(927385,935762)(1030103,1040103)(1030103,1040103)	NC_044998.1	1035103	29.4289	31.4917	6.84164	42.6697	37.0807	0.283062	1.46495	1.68428	-0.363127	0.268394	8377
(935763,944646)(1040104,1050104)(1040104,1050104)	NC_044998.1	1045104	41.7901	40.5796	44.3662	46.627	43.6033	-0.117699	-0.160744	-0.137536	-0.138715	0.045007	8883
(944647,954171)(1050105,1060118)(1050105,1060105)	NC_044998.1	1055105	40.5037	45.1652	14.1191	63.413	54.2891	0.467409	1.35832	1.45158	-0.431774	0.352917	9524
(954171,963173)(1060118,1070106)(1060106,1070106)	NC_044998.1	1065106	45.3834	52.3908	16.4934	69.7734	61.0821	0.628115	1.40706	1.42487	-0.367339	0.359154	9002
(963174,972670)(1070107,1080107)(1070107,1080107)	NC_044998.1	1075107	41.8675	46.5195	27.1249	52.3269	49.4232	0.451485	0.821852	0.785718	-0.132966	0.187205	9496
(972671,981897)(1080108,1090108)(1080108,1090108)	NC_044998.1	1085108	43.354	49.7467	9.16542	53.6454	51.6961	0.599464	1.66264	1.76206	-0.086222	0.199683	9226
(981898,989608)(1090109,1100109)(1090109,1100109)	NC_044998.1	1095109	41.4016	44.5389	19.613	60.2256	52.3822	0.307852	1.06771	1.17378	-0.363176	0.275088	7710
(989609,999329)(1100110,1110110)(1100110,1110110)	NC_044998.1	1105110	50.1202	61.427	23.5583	78.1863	69.8067	0.918894	1.34811	1.19043	-0.320871	0.408236	9720
(999330,1008504)(1110111,1120111)(1110111,1120111)	NC_044998.1	1115111	51.7592	53.4586	26.6483	66.259	59.8588	0.133783	0.925062	1.09094	-0.237355	0.162692	9174
(1008505,1017731)(1120112,1130112)(1120112,1130112)	NC_044998.1	1125112	38.501	43.8277	13.7048	54.1552	48.9914	0.561452	1.38394	1.43207	-0.25699	0.282357	9226
(1017732,1027617)(1130113,1140113)(1130113,1140113)	NC_044998.1	1135113	43.3491	54.1254	19.1433	58.8942	56.5098	1.01063	1.43339	1.24768	-0.105477	0.315059	9885
(1027618,1037232)(1140114,1150114)(1140114,1150114)	NC_044998.1	1145114	35.2672	39.7421	11.9452	48.0913	43.9167	0.514166	1.38945	1.46462	-0.226668	0.253858	9614
(1037233,1047057)(1150115,1160115)(1150115,1160115)	NC_044998.1	1155115	51.576	57.3502	21.0494	72.5819	64.9661	0.456184	1.25685	1.33078	-0.283435	0.269907	9824
(1047058,1056259)(1160116,1170116)(1160116,1170116)	NC_044998.1	1165116	49.3462	53.8187	30.8172	85.7602	69.7895	0.369103	0.831311	0.842998	-0.621089	0.430513	9201
(1056260,1064920)(1170117,1180117)(1170117,1180117)	NC_044998.1	1175117	40.6025	45.0949	27.583	60.5033	52.7991	0.449375	0.764377	0.714612	-0.363707	0.311492	8660
(1064921,1073680)(1180118,1190118)(1180118,1190118)	NC_044998.1	1185118	41.9982	43.6931	31.598	59.8759	51.7845	0.163988	0.510992	0.55263	-0.369374	0.241726	8759
(1073681,1083246)(1190119,1200119)(1190119,1200119)	NC_044998.1	1195119	36.5117	45.318	11.0084	64.1892	54.7536	0.977926	1.65881	1.5495	-0.494993	0.517385	9565
(1083247,1092479)(1200120,1210121)(1200120,1210120)	NC_044998.1	1205120	47.4786	51.065	16.1055	53.8816	52.4733	0.307466	1.31167	1.48149	-0.05691	0.109277	9232
(1092479,1102383)(1210121,1220121)(1210121,1220121)	NC_044998.1	1215121	37.4988	39.6538	20.422	46.9774	43.3156	0.233112	0.906279	1.01143	-0.187077	0.160692	9904
(1102384,1111786)(1220122,1230122)(1220122,1230122)	NC_044998.1	1225122	41.8584	41.7771	30.8004	61.756	51.7666	-0.00789	0.465239	0.589466	-0.457532	0.245544	9402
(1111787,1121532)(1230123,1240123)(1230123,1240123)	NC_044998.1	1235123	53.7181	60.4953	22.2921	78.8289	69.6621	0.514314	1.2714	1.31709	-0.327621	0.308689	9745
(1121533,1131326)(1240124,1250124)(1240124,1250124)	NC_044998.1	1245124	48.0158	53.891	19.8043	68.1675	61.0292	0.498123	1.26505	1.31781	-0.28525	0.281564	9793
(1131327,1140936)(1250125,1260125)(1250125,1260125)	NC_044998.1	1255125	45.5246	54.634	12.9563	70.5713	62.6026	0.814025	1.62872	1.60148	-0.335757	0.38951	9609
(1140937,1150166)(1260126,1270126)(1260126,1270126)	NC_044998.1	1265126	44.9942	47.8633	30.2725	63.4716	55.6674	0.259363	0.695275	0.732127	-0.332679	0.24627	9229
(1150167,1159330)(1270127,1280127)(1270127,1280127)	NC_044998.1	1275127	39.8678	44.5017	20.6834	57.9136	51.2077	0.47194	1.05811	1.07158	-0.322376	0.294883	9163
(1159331,1169020)(1280128,1290128)(1280128,1290128)	NC_044998.1	1285128	41.2908	50.5482	30.145	54.7548	52.6515	0.910815	0.876248	0.601982	-0.097651	0.285366	9689
(1169021,1178850)(1290129,1300129)(1290129,1300129)	NC_044998.1	1295129	45.5729	50.5554	24.1208	46.5366	48.546	0.444784	1.03198	1.05379	0.084576	0.06774	9829
(1178851,1188576)(1300130,1310130)(1300130,1310130)	NC_044998.1	1305130	50.2018	59.3126	16.7505	69.9373	64.625	0.739235	1.5128	1.49685	-0.203091	0.29861	9725
(1188577,1197756)(1310131,1320131)(1310131,1320131)	NC_044998.1	1315131	50.5784	56.9256	22.1149	69.6404	63.283	0.511218	1.22835	1.26449	-0.241242	0.261091	9179
(1197757,1207384)(1320132,1330132)(1320132,1330132)	NC_044998.1	1325132	51.1414	61.2416	14.5437	82.3131	71.7773	0.804646	1.63018	1.60855	-0.395419	0.419465	9627
(1207385,1215869)(1330133,1340133)(1330133,1340133)	NC_044998.1	1335133	38.526	43.8234	14.6666	63.1496	53.4865	0.558003	1.33871	1.37711	-0.480604	0.402412	8484
(1215870,1225675)(1340134,1350134)(1340134,1350134)	NC_044998.1	1345134	46.5314	44.9535	37.6192	48.9354	46.9445	-0.137993	0.280609	0.429104	-0.082084	0.009219	9805
(1225676,1235422)(1350135,1360135)(1350135,1360135)	NC_044998.1	1355135	51.943	54.4219	36.5542	53.566	53.9939	0.194474	0.614388	0.666276	0.015816	0.041052	9746
(1235423,1245172)(1360136,1370136)(1360136,1370136)	NC_044998.1	1365136	46.7039	50.5116	21.9337	52.105	51.3083	0.331786	1.08947	1.18839	-0.032726	0.102392	9749
(1245173,1254986)(1370137,1380137)(1370137,1380137)	NC_044998.1	1375137	32.4114	34.8402	19.4494	47.1878	41.014	0.303199	0.834156	0.882094	-0.364514	0.274395	9813
(1254987,1264599)(1380138,1390138)(1380138,1390138)	NC_044998.1	1385138	55.3742	68.2652	14.6058	92.8918	80.5785	0.949347	1.73378	1.65913	-0.426977	0.473508	9612
(1264600,1274472)(1390139,1400139)(1390139,1400139)	NC_044998.1	1395139	30.1951	36.094	12.5931	35.1342	35.6141	0.789339	1.36286	1.28103	0.030395	0.185333	9872
(1274473,1284243)(1400140,1410140)(1400140,1410140)	NC_044998.1	1405140	42.6232	45.5108	26.2429	54.1103	49.8105	0.275352	0.802495	0.858131	-0.193423	0.174957	9770
(1284244,1293641)(1410141,1420141)(1410141,1420141)	NC_044998.1	1415141	33.619	41.0556	11.4824	51.4265	46.2411	0.89559	1.54766	1.45499	-0.29525	0.38835	9397
(1293642,1302220)(1420142,1430142)(1420142,1430142)	NC_044998.1	1425142	35.095	37.2496	21.9657	56.0276	46.6386	0.24876	0.767576	0.828374	-0.512282	0.340441	8578
(1302221,1311590)(1430143,1440179)(1430143,1440143)	NC_044998.1	1435143	48.9294	53.0913	39.1781	57.996	55.5436	0.346356	0.506999	0.447294	-0.096179	0.140463	9369
(1311590,1320752)(1440179,1450144)(1440144,1450144)	NC_044998.1	1445144	46.2506	50.4007	25.9772	65.8875	58.1441	0.365116	0.939934	0.98183	-0.321174	0.267051	9162
(1320753,1330606)(1450145,1460145)(1450145,1460145)	NC_044998.1	1455145	50.6221	61.7999	12.961	68.3092	65.0545	0.899512	1.7219	1.6717	-0.123397	0.296346	9853
(1330607,1340048)(1460146,1470146)(1460146,1470146)	NC_044998.1	1465146	38.4847	50.5499	7.93578	52.0449	51.2974	1.27224	1.95861	1.76502	-0.037216	0.345005	9441
(1340049,1349331)(1470147,1480147)(1470147,1480147)	NC_044998.1	1475147	33.8849	42.2785	6.78038	44.5222	43.4004	1.00306	1.84377	1.76822	-0.063377	0.290504	9282
(1349332,1358159)(1480148,1490148)(1480148,1490148)	NC_044998.1	1485148	35.5718	41.6169	14.0959	53.0018	47.3093	0.688732	1.36435	1.33768	-0.306457	0.341581	8827
(1358160,1367816)(1490149,1500149)(1490149,1500149)	NC_044998.1	1495149	37.3468	40.212	14.8405	45.4363	42.8241	0.311184	1.20029	1.3382	-0.13399	0.151923	9656
(1367817,1376780)(1500150,1510150)(1500150,1510150)	NC_044998.1	1505150	44.3255	53.2975	14.6724	66.3967	59.8471	0.823133	1.54894	1.49608	-0.283387	0.363482	8963
(1376781,1386229)(1510151,1520151)(1510151,1520151)	NC_044998.1	1515151	34.7142	38.7105	16.5791	37.7576	38.2341	0.466365	1.12316	1.15616	0.026279	0.10493	9448
(1386230,1395546)(1520152,1530152)(1520152,1530152)	NC_044998.1	1525152	39.2063	48.2454	9.96047	51.7057	49.9756	0.935887	1.72844	1.65996	-0.084568	0.284714	9316
(1395547,1404670)(1530153,1540153)(1530153,1540153)	NC_044998.1	1535153	41.1785	47.6309	17.5298	56.1111	51.871	0.636551	1.29614	1.2806	-0.197388	0.269306	9123
(1404671,1414002)(1540154,1550154)(1540154,1550154)	NC_044998.1	1545154	41.7703	41.2929	25.7598	43.6124	42.4527	-0.046434	0.659702	0.855197	-0.05323	0.016946	9331
(1414003,1423685)(1550155,1560155)(1550155,1560155)	NC_044998.1	1555155	44.2895	47.0766	25.184	60.3329	53.7047	0.255904	0.878625	0.96468	-0.287018	0.220662	9682
(1423686,1433505)(1560156,1570156)(1560156,1570156)	NC_044998.1	1565156	41.5332	44.5782	20.2726	52.119	48.3486	0.29786	1.03796	1.14185	-0.174036	0.170205	9819
(1433506,1442957)(1570157,1580157)(1570157,1580157)	NC_044998.1	1575157	44.4506	57.2864	14.3143	60.7049	58.9957	1.17436	1.71857	1.51634	-0.073749	0.339667	9451
(1442958,1451912)(1580158,1590158)(1580158,1590158)	NC_044998.1	1585158	46.9577	54.9359	22.304	59.4311	57.1835	0.691474	1.23751	1.17664	-0.091829	0.226184	8954
(1451913,1461016)(1590159,1600159)(1590159,1600159)	NC_044998.1	1595159	33.3985	38.8947	14.5811	48.7332	43.8139	0.666198	1.28046	1.24459	-0.281926	0.322542	9103
(1461017,1470837)(1600160,1610160)(1600160,1610160)	NC_044998.1	1605160	41.4909	46.761	26.6901	56.9971	51.8791	0.516051	0.857965	0.795691	-0.236477	0.259692	9820
(1470838,1479593)(1610161,1620161)(1610161,1620161)	NC_044998.1	1615161	38.6158	44.9999	23.7511	53.1597	49.0798	0.670932	0.973438	0.856049	-0.202448	0.280817	8755
(1479594,1488904)(1620162,1630162)(1620162,1630162)	NC_044998.1	1625162	44.311	46.6981	33.1166	46.5536	46.6258	0.219075	0.544814	0.564964	0.003127	0.054226	9310
(1488905,1497997)(1630163,1640163)(1630163,1640163)	NC_044998.1	1635163	48.3528	47.6233	42.7077	51.7337	49.6785	-0.061419	0.181198	0.261917	-0.081557	0.028486	9092
(1497998,1506744)(1640164,1650164)(1640164,1650164)	NC_044998.1	1645164	36.0228	38.863	21.7239	53.7407	46.3018	0.319611	0.839451	0.880003	-0.395499	0.295443	8746
(1506745,1516242)(1650165,1660165)(1650165,1660165)	NC_044998.1	1655165	37.5641	43.3924	22.931	51.0381	47.2153	0.629399	0.962617	0.865258	-0.194968	0.266164	9497
(1516243,1525842)(1660166,1670166)(1660166,1670166)	NC_044998.1	1665166	55.5673	63.4441	22.1602	88.3179	75.881	0.578093	1.32941	1.35497	-0.429772	0.380317	9599
(1525843,1535730)(1670167,1680167)(1670167,1680167)	NC_044998.1	1675167	41.0298	42.2012	26.1235	42.6502	42.4257	0.115974	0.694722	0.81	-0.010488	0.035283	9887
(1535731,1545386)(1680168,1690168)(1680168,1690168)	NC_044998.1	1685168	41.1138	45.9084	19.8219	47.4427	46.6755	0.473732	1.12498	1.15472	-0.035768	0.140298	9655
(1545387,1555090)(1690169,1700169)(1690169,1700169)	NC_044998.1	1695169	44.2806	50.876	13.5705	59.0289	54.9524	0.605698	1.49748	1.55092	-0.176556	0.250162	9703
(1555091,1564116)(1700170,1710170)(1700170,1710170)	NC_044998.1	1705170	36.8547	45.9117	8.90303	55.8757	50.8937	0.996559	1.7733	1.68316	-0.258941	0.394522	9025
(1564117,1573785)(1710171,1720171)(1710171,1720171)	NC_044998.1	1715171	42.0734	47.3037	14.909	66.4096	56.8566	0.505165	1.36625	1.44094	-0.435318	0.364507	9668
(1573786,1583623)(1720172,1730172)(1720172,1730172)	NC_044998.1	1725172	41.3542	46.3053	15.4769	65.5812	55.9433	0.486392	1.32202	1.39558	-0.446784	0.365903	9837
(1583624,1593450)(1730173,1740173)(1730173,1740173)	NC_044998.1	1735173	37.2149	47.1473	16.13	53.7324	50.4398	1.08248	1.47238	1.25793	-0.169486	0.368095	9826
(1593451,1602312)(1740174,1750174)(1740174,1750174)	NC_044998.1	1745174	43.1668	46.1879	24.5564	57.1228	51.6553	0.284503	0.889972	0.963167	-0.242874	0.204058	8861
(1602313,1612022)(1750175,1760175)(1750175,1760175)	NC_044998.1	1755175	46.8526	45.793	37.0659	50.041	47.917	-0.092044	0.331679	0.468098	-0.086972	0.023595	9709
(1612023,1621408)(1760176,1770176)(1760176,1770176)	NC_044998.1	1765176	47.5204	51.8986	24.1692	60.435	56.1668	0.375027	1.03951	1.10175	-0.172328	0.189008	9385
(1621409,1631048)(1770177,1780177)(1770177,1780177)	NC_044998.1	1775177	50.0211	56.4287	23.7574	73.2491	64.8389	0.521759	1.16532	1.17932	-0.322677	0.307879	9639
(1631049,1640461)(1780178,1790178)(1780178,1790178)	NC_044998.1	1785178	55.7606	64.4709	20.6343	85.752	75.1115	0.637074	1.40684	1.41991	-0.366429	0.361046	9412
(1640462,1648701)(1790179,1800179)(1790179,1800179)	NC_044998.1	1795179	27.4936	30.7624	11.0113	32.9122	31.8373	0.479423	1.25226	1.31048	-0.07471	0.162896	8239
(1648702,1657668)(1800180,1810180)(1800180,1810180)	NC_044998.1	1805180	36.5439	45.4915	12.7481	54.0458	49.7687	0.992775	1.58176	1.44454	-0.224182	0.374764	8966
(1657669,1667211)(1810181,1820430)(1810181,1820181)	NC_044998.1	1815181	36.8115	43.4379	15.3319	49.0273	46.2326	0.729965	1.34824	1.29489	-0.145426	0.26506	9542
(1667211,1676706)(1820430,1830182)(1820182,1830182)	NC_044998.1	1825182	44.7401	48.824	28.1514	65.3314	57.0777	0.371259	0.821577	0.829481	-0.353827	0.286273	9495
(1676707,1686271)(1830183,1840183)(1830183,1840183)	NC_044998.1	1835183	50.5901	60.9388	26.4359	79.0069	69.9729	0.833315	1.21721	1.07281	-0.342734	0.398242	9564
(1686272,1694834)(1840184,1850184)(1840184,1850184)	NC_044998.1	1845184	37.4076	41.1631	32.0772	51.9501	46.5566	0.407213	0.429169	0.316451	-0.276215	0.253353	8562
(1694835,1704055)(1850185,1860185)(1850185,1860185)	NC_044998.1	1855185	45.8597	51.2015	16.4826	63.6774	57.4395	0.473915	1.34718	1.4344	-0.260925	0.2622	9220
(1704056,1712601)(1860186,1870186)(1860186,1870186)	NC_044998.1	1865186	41.993	47.9168	11.8603	71.9167	59.9168	0.573222	1.52349	1.60133	-0.547866	0.442778	8545
(1712602,1722284)(1870187,1880187)(1870187,1880187)	NC_044998.1	1875187	44.2342	49.1375	14.9746	61.0175	55.0775	0.450774	1.37273	1.47915	-0.257537	0.254447	9682
(1722285,1732104)(1880188,1890188)(1880188,1890188)	NC_044998.1	1885188	42.1919	53.3506	22.2621	61.3249	57.3377	1.07478	1.3076	1.05433	-0.181183	0.372412	9819
(1732105,1741779)(1890189,1900189)(1890189,1900189)	NC_044998.1	1895189	40.2872	42.7484	19.4276	48.7177	45.733	0.248087	1.02561	1.15352	-0.141998	0.140157	9674
(1741780,1750836)(1900190,1910190)(1900190,1910190)	NC_044998.1	1905190	34.9315	38.3433	19.3169	46.0592	42.2013	0.395727	0.959824	0.989575	-0.211472	0.215387	9056
(1750837,1760017)(1910191,1920191)(1910191,1920191)	NC_044998.1	1915191	61.2001	67.4827	32.1667	79.7473	73.615	0.419085	1.03507	1.07224	-0.19249	0.211213	9180
(1760018,1769755)(1920192,1930234)(1920192,1930192)	NC_044998.1	1925192	43.5346	48.8637	27.4357	67.79	58.3268	0.497677	0.874398	0.826419	-0.416841	0.352625	9737
(1769755,1778736)(1930234,1940193)(1930193,1940193)	NC_044998.1	1935193	42.9685	50.9346	24.7352	47.3703	49.1525	0.753608	1.08272	0.947834	0.07953	0.149338	8981
(1778737,1787693)(1940194,1950357)(1940194,1950194)	NC_044998.1	1945194	51.6073	62.5542	9.96592	82.7888	72.6715	0.864315	1.8197	1.81425	-0.376303	0.424339	8956
(1787693,1796962)(1950357,1960195)(1950195,1960195)	NC_044998.1	1955195	55.0922	61.1627	27.3054	89.2739	75.2183	0.449319	1.09941	1.13643	-0.489877	0.380024	9269
(1796963,1806876)(1960196,1970196)(1960196,1970196)	NC_044998.1	1965196	45.2323	49.9516	28.0438	59.8904	54.921	0.424419	0.861497	0.850472	-0.210728	0.222391	9913
(1806877,1816570)(1970197,1980197)(1970197,1980197)	NC_044998.1	1975197	42.6371	48.0656	17.0869	68.8112	58.4384	0.51747	1.28983	1.33811	-0.466469	0.384517	9693
(1816571,1824159)(1980198,1990198)(1980198,1990198)	NC_044998.1	1985198	43.6771	51.446	20.2776	55.6947	53.5703	0.723191	1.26785	1.19742	-0.093271	0.235079	7588
(1824160,1832301)(1990199,2000199)(1990199,2000199)	NC_044998.1	1995199	44.7015	43.4577	34.1379	57.4881	50.4729	-0.113163	0.370703	0.528651	-0.300993	0.13403	8141
(1832302,1841578)(2000200,2010200)(2000200,2010200)	NC_044998.1	2005200	41.5442	45.4544	24.6764	41.1862	43.3203	0.382409	0.887092	0.905694	0.098481	0.044345	9276
(1841579,1850736)(2010201,2020201)(2010201,2020201)	NC_044998.1	2015201	34.7401	37.4851	16.9739	44.3403	40.9127	0.320099	1.04019	1.13184	-0.18891	0.183872	9157
(1850737,1860257)(2020202,2030202)(2020202,2030202)	NC_044998.1	2025202	46.3191	52.2891	19.0671	55.3423	53.8157	0.524453	1.27671	1.31792	-0.063227	0.168078	9520
(1860258,1870155)(2030203,2040203)(2030203,2040203)	NC_044998.1	2035203	45.0086	53.982	20.2352	50.0203	52.0011	0.810938	1.33343	1.23163	0.084414	0.161291	9897
(1870156,1879033)(2040204,2050204)(2040204,2050204)	NC_044998.1	2045204	47.696	49.1225	25.7396	70.5031	59.8128	0.121747	0.873445	1.03226	-0.43004	0.263905	8877
(1879034,1888882)(2050205,2060205)(2050205,2060205)	NC_044998.1	2055205	52.9212	58.5791	24.4549	59.3927	58.9859	0.435766	1.15228	1.21044	-0.014756	0.11917	9848
(1888883,1898742)(2060206,2070206)(2060206,2070206)	NC_044998.1	2065206	45.0708	54.4743	16.4343	66.2529	60.3636	0.848654	1.50106	1.42179	-0.250628	0.352267	9859
(1898743,1907941)(2070207,2080207)(2070207,2080207)	NC_044998.1	2075207	49.8356	55.1146	18.6916	75.1837	65.1492	0.431443	1.30384	1.40349	-0.386423	0.319353	9198
(1907942,1917782)(2080208,2090208)(2080208,2090208)	NC_044998.1	2085208	42.067	46.7783	32.5224	52.1835	49.4809	0.455106	0.601332	0.506371	-0.123173	0.182831	9840
(1917783,1926249)(2090209,2100209)(2090209,2100209)	NC_044998.1	2095209	42.6622	45.2003	20.9541	61.3475	53.2739	0.241806	1.00895	1.13625	-0.36286	0.258081	8466
(1926250,1935090)(2100210,2110210)(2100210,2110210)	NC_044998.1	2105210	39.8636	42.6609	19.6135	47.8171	45.239	0.284929	1.02397	1.13122	-0.123949	0.139799	8840
(1935091,1944873)(2110211,2120211)(2110211,2120211)	NC_044998.1	2115211	50.2184	49.9942	26.8958	80.0076	65.0009	-0.018192	0.820731	1.04328	-0.573516	0.305948	9782
(1944874,1954630)(2120212,2130212)(2120212,2130212)	NC_044998.1	2125212	46.1659	50.5839	36.4566	65.8116	58.1978	0.389388	0.544653	0.471047	-0.316377	0.270648	9756
(1954631,1964202)(2130213,2140213)(2130213,2140213)	NC_044998.1	2135213	52.1716	61.7053	16.3967	74.2509	67.9781	0.74469	1.55132	1.54235	-0.230799	0.31501	9571
(1964203,1973966)(2140214,2150214)(2140214,2150214)	NC_044998.1	2145214	48.8431	54.2097	27.7157	56.3135	55.2616	0.447404	0.967106	0.970767	-0.041326	0.136547	9763
(1973967,1983655)(2150215,2160215)(2150215,2160215)	NC_044998.1	2155215	36.2329	47.0772	19.6374	54.5794	50.8283	1.21336	1.33648	1.0157	-0.198286	0.417105	9688
(1983656,1992595)(2160216,2170216)(2160216,2170216)	NC_044998.1	2165216	38.7303	40.1216	17.1832	58.5677	49.3447	0.145795	1.04785	1.23737	-0.456314	0.284022	8939
(1992596,2002177)(2170217,2180217)(2170217,2180217)	NC_044998.1	2175217	37.6626	38.3446	20.1474	47.198	42.7713	0.073465	0.853939	1.03308	-0.225176	0.140526	9581
(2002178,2011257)(2180218,2190218)(2180218,2190218)	NC_044998.1	2185218	43.1522	46.0387	28.1058	55.7364	50.8875	0.271921	0.738043	0.778966	-0.215467	0.186015	9079
(2011258,2019706)(2190219,2200219)(2190219,2200219)	NC_044998.1	2195219	44.7481	46.0345	36.9559	55.7069	50.8707	0.116919	0.36074	0.389565	-0.207287	0.142039	8448
(2019707,2029571)(2200220,2210220)(2200220,2210220)	NC_044998.1	2205220	43.5741	49.9675	15.5945	65.1834	57.5755	0.596537	1.40141	1.43505	-0.334818	0.333472	9864
(2029572,2039424)(2210221,2220221)(2210221,2220221)	NC_044998.1	2215221	42.5537	45.0554	30.362	48.5675	46.8115	0.238936	0.612938	0.639704	-0.079124	0.103811	9852
(2039425,2048708)(2220222,2230222)(2220222,2230222)	NC_044998.1	2225222	49.5132	51.0841	31.6889	70.9248	61.0045	0.129212	0.698678	0.808293	-0.384502	0.241187	9283
(2048709,2058610)(2230223,2240223)(2230223,2240223)	NC_044998.1	2235223	49.4821	49.1636	30.1562	64.5946	56.8791	-0.026217	0.685125	0.87692	-0.29923	0.155349	9901
(2058611,2068223)(2240224,2250224)(2240224,2250224)	NC_044998.1	2245224	38.5526	41.2262	20.2177	58.2287	49.7275	0.281438	0.963949	1.05755	-0.42253	0.300382	9612
(2068224,2077454)(2250225,2260225)(2250225,2260225)	NC_044998.1	2255225	43.7689	51.6018	17.5571	60.7666	56.1842	0.727642	1.38205	1.33863	-0.200777	0.294397	9230
(2077455,2087209)(2260226,2270226)(2260226,2270226)	NC_044998.1	2265226	45.8725	52.7182	21.5961	56.4262	54.5722	0.607165	1.20729	1.18503	-0.077529	0.196932	9754
(2087210,2096806)(2270227,2280227)(2270227,2280227)	NC_044998.1	2275227	50.3591	54.4481	15.5739	68.9762	61.7121	0.330749	1.37753	1.55183	-0.276841	0.234321	9596
(2096807,2105770)(2280228,2290228)(2280228,2290228)	NC_044998.1	2285228	47.2552	51.3688	30.42	50.5533	50.961	0.354312	0.789597	0.79861	0.016556	0.081458	8963
(2105771,2114662)(2290229,2300229)(2290229,2300229)	NC_044998.1	2295229	49.2565	56.5211	12.3824	64.0107	60.2659	0.600606	1.59806	1.68058	-0.145898	0.232264	8891
(2114663,2124190)(2300230,2310230)(2300230,2310230)	NC_044998.1	2305230	56.3354	62.925	20.6282	68.1732	65.5491	0.4771	1.34394	1.42911	-0.089448	0.170169	9527
(2124191,2132984)(2310231,2320231)(2310231,2320231)	NC_044998.1	2315231	41.5966	43.6052	20.9664	38.8726	41.2389	0.196197	0.965363	1.10637	0.109059	-0.008919	8793
(2132985,2141633)(2320232,2330232)(2320232,2330232)	NC_044998.1	2325232	38.0573	41.5283	7.64902	50.7915	46.1599	0.370058	1.57398	1.77576	-0.233175	0.220599	8648
(2141634,2151020)(2330233,2340233)(2330233,2340233)	NC_044998.1	2335233	33.1511	38.8398	20.4353	39.7564	39.2981	0.694577	0.976181	0.846991	-0.02646	0.191757	9386
(2151021,2160211)(2340234,2350234)(2340234,2350234)	NC_044998.1	2345234	39.2652	45.9749	17.0365	43.3303	44.6526	0.693667	1.30458	1.25987	0.064535	0.142217	9190
(2160212,2169807)(2350235,2360235)(2350235,2360235)	NC_044998.1	2355235	43.9688	54.2237	10.914	59.9507	57.0872	0.94836	1.75043	1.68071	-0.124896	0.309669	9595
(2169808,2179474)(2360236,2370236)(2360236,2370236)	NC_044998.1	2365236	51.6243	62.9477	17.6569	59.21	61.0789	0.893754	1.56668	1.47944	0.069488	0.190401	9666
(2179475,2188372)(2370237,2380237)(2370237,2380237)	NC_044998.1	2375237	40.1886	49.7084	10.9333	56.255	52.9817	0.961925	1.7093	1.6216	-0.15611	0.33005	8897
(2188373,2196870)(2380238,2390238)(2380238,2390238)	NC_044998.1	2385238	36.6567	46.4317	11.2309	48.5392	47.4854	1.08128	1.69543	1.53896	-0.055062	0.30593	8497
(2196871,2206433)(2390239,2401823)(2390239,2400239)	NC_044998.1	2395239	46.9238	52.8553	14.2846	74.436	63.6457	0.514452	1.46375	1.55884	-0.441169	0.370135	9562
(2206433,2214695)(2401823,2410240)(2400240,2410240)	NC_044998.1	2405240	30.913	37.7466	9.35284	53.6972	45.7219	0.893581	1.6101	1.53458	-0.493508	0.494889	8262
(2214696,2222487)(2410241,2420350)(2410241,2420241)	NC_044998.1	2415241	52.8011	61.9509	24.7702	64.6879	63.3194	0.706286	1.25827	1.19455	-0.049756	0.207147	7791
(2222487,2231867)(2420350,2430781)(2420242,2430242)	NC_044998.1	2425242	50.8685	54.968	18.1562	53.0406	54.0043	0.32832	1.29176	1.44523	0.036361	0.06408	9380
(2231867,2240532)(2430781,2440243)(2430243,2440243)	NC_044998.1	2435243	52.4417	60.9764	21.2321	67.6874	64.3319	0.663258	1.35398	1.33882	-0.122831	0.235753	8665
(2240533,2250359)(2440244,2450244)(2440244,2450244)	NC_044998.1	2445244	41.0292	45.0047	17.8265	59.4407	52.2227	0.393594	1.17439	1.26084	-0.337235	0.282936	9826
(2250360,2260094)(2450245,2460245)(2450245,2460245)	NC_044998.1	2455245	32.7074	33.4903	26.6988	43.6108	38.5506	0.096864	0.364901	0.405387	-0.296087	0.184716	9734
(2260095,2270035)(2460246,2470246)(2460246,2470246)	NC_044998.1	2465246	34.0207	37.4604	9.26895	63.2654	50.3629	0.409447	1.45866	1.6086	-0.726039	0.49696	9940
(2270036,2279754)(2470247,2480247)(2470247,2480247)	NC_044998.1	2475247	36.7061	40.5202	9.04027	65.7773	53.1487	0.421345	1.51426	1.67239	-0.65901	0.463917	9718
(2279755,2289262)(2480248,2490248)(2480248,2490248)	NC_044998.1	2485248	47.6665	52.8936	30.6337	64.0528	58.4732	0.44639	0.831999	0.801261	-0.22459	0.235516	9507
(2289263,2298432)(2490249,2500249)(2490249,2500249)	NC_044998.1	2495249	39.2972	43.4434	15.5145	56.6255	50.0345	0.428306	1.25808	1.34689	-0.321423	0.283217	9169
(2298433,2306855)(2500250,2510250)(2500250,2510250)	NC_044998.1	2505250	45.8587	55.2469	21.309	58.8764	57.0617	0.832918	1.31691	1.19872	-0.07591	0.253673	8422
(2306856,2316509)(2510251,2520645)(2510251,2520251)	NC_044998.1	2515251	35.4902	43.7569	10.3469	47.8901	45.8235	0.943968	1.65995	1.56955	-0.111512	0.301396	9653
(2316509,2326019)(2520645,2530252)(2520252,2530252)	NC_044998.1	2525252	49.7363	55.9989	23.0186	65.562	60.7805	0.512834	1.18288	1.20634	-0.184499	0.230771	9510
(2326020,2335677)(2530253,2540253)(2530253,2540253)	NC_044998.1	2535253	46.4329	50.7259	22.0836	65.8748	58.3003	0.376224	1.0981	1.17476	-0.312939	0.26543	9657
(2335678,2345156)(2540254,2550254)(2540254,2550254)	NC_044998.1	2545254	41.4747	52.304	18.2766	57.4225	54.8633	1.06082	1.45511	1.2476	-0.118296	0.33483	9478
(2345157,2354776)(2550255,2560255)(2550255,2560255)	NC_044998.1	2555255	43.0148	43.536	33.9168	57.1084	50.3222	0.049259	0.397109	0.472456	-0.302514	0.17628	9619
(2354777,2364544)(2560256,2570256)(2560256,2570256)	NC_044998.1	2565256	34.5172	39.3075	8.95349	66.6977	53.0026	0.562151	1.54889	1.63862	-0.759639	0.554159	9767
(2364545,2373822)(2570257,2580257)(2570257,2580257)	NC_044998.1	2575257	50.2058	57.456	20.0241	66.6611	62.0586	0.588224	1.33035	1.35044	-0.17594	0.245374	9277
(2373823,2383690)(2580258,2590259)(2580258,2590258)	NC_044998.1	2585258	36.6849	43.0997	17.0985	50.8827	46.9912	0.709049	1.25141	1.18465	-0.203191	0.29095	9867
(2383690,2393414)(2590259,2600259)(2590259,2600259)	NC_044998.1	2595259	40.5113	44.6396	16.789	42.2491	43.4444	0.413877	1.21829	1.30487	0.056554	0.075076	9724
(2393415,2400541)(2600260,2610260)(2600260,2610260)	NC_044998.1	2605260	34.3094	40.7056	15.2906	47.0836	43.8946	0.755077	1.30439	1.22612	-0.17795	0.289064	7126
(2400542,2408813)(2610261,2620261)(2610261,2620261)	NC_044998.1	2615261	39.6493	40.5658	32.181	49.1156	44.8407	0.093852	0.374469	0.419355	-0.206633	0.135734	8271
(2408814,2418626)(2620262,2630262)(2620262,2630262)	NC_044998.1	2625262	40.8863	40.5792	35.9092	62.5842	51.5817	-0.030512	0.202477	0.271367	-0.515836	0.271279	9812
(2418627,2427556)(2630263,2640263)(2630263,2640263)	NC_044998.1	2635263	36.8266	37.1063	24.976	49.9787	43.5425	0.0308	0.58166	0.714126	-0.334776	0.188873	8929
(2427557,2437278)(2640264,2650264)(2640264,2650264)	NC_044998.1	2645264	35.0294	37.7213	10.1996	54.6847	46.203	0.311355	1.38465	1.5694	-0.463637	0.330134	9721
(2437279,2447139)(2650265,2660265)(2650265,2660265)	NC_044998.1	2655265	38.8163	41.426	18.0019	46.6006	44.0133	0.272874	1.06775	1.19276	-0.127726	0.138759	9860
(2447140,2456348)(2660266,2670266)(2660266,2670266)	NC_044998.1	2665266	46.6502	51.0813	24.6124	69.3179	60.1996	0.38655	1.0102	1.05847	-0.374979	0.301654	9208
(2456349,2465691)(2670267,2680267)(2670267,2680267)	NC_044998.1	2675267	41.8616	45.327	28.0885	50.6779	48.0025	0.336372	0.730588	0.734148	-0.122529	0.15217	9342
(2465692,2475388)(2680268,2690268)(2680268,2690268)	NC_044998.1	2685268	42.7986	44.624	18.32	55.2898	49.9569	0.173359	1.09121	1.27734	-0.238923	0.173544	9696
(2475389,2485266)(2690269,2700269)(2690269,2700269)	NC_044998.1	2695269	54.3292	64.4824	10.845	62.7782	63.6303	0.761947	1.76551	1.80262	0.030113	0.178069	9877
(2485267,2494510)(2700270,2710270)(2700270,2710270)	NC_044998.1	2705270	48.0029	54.8343	21.9233	60.2135	57.5239	0.579349	1.22173	1.21855	-0.107507	0.206055	9243
(2494511,2504163)(2710271,2720881)(2710271,2720271)	NC_044998.1	2715271	59.6137	66.3361	22.0736	81.0947	73.7154	0.460232	1.33096	1.42223	-0.237768	0.246243	9652
(2504163,2513408)(2720881,2730272)(2720272,2730272)	NC_044998.1	2725272	50.8884	54.3555	27.7223	60.8865	57.621	0.277566	0.934228	1.02309	-0.123163	0.137525	9245
(2513409,2522392)(2730273,2740273)(2730273,2740273)	NC_044998.1	2735273	46.4251	57.3733	21.2947	59.3995	58.3864	0.95962	1.38342	1.21264	-0.041863	0.267573	8983
(2522393,2531724)(2740274,2750274)(2740274,2750274)	NC_044998.1	2745274	44.1978	54.6253	16.0996	61.7786	58.202	0.959407	1.54927	1.42157	-0.155198	0.328887	9331
(2531725,2541258)(2750275,2760275)(2750275,2760275)	NC_044998.1	2755275	41.2931	50.3231	4.91595	56.8771	53.6001	0.888388	1.94998	1.96462	-0.152133	0.309117	9533
(2541259,2550464)(2760276,2770343)(2760276,2770276)	NC_044998.1	2765276	44.4131	48.5567	21.0078	58.3377	53.4472	0.379411	1.10265	1.17862	-0.211187	0.211146	9205
(2550464,2559434)(2770343,2780277)(2770277,2780277)	NC_044998.1	2775277	57.4306	60.7338	33.8533	85.1755	72.9546	0.23465	0.838227	0.92618	-0.408668	0.281295	8970
(2559435,2568237)(2780278,2790300)(2780278,2790278)	NC_044998.1	2785278	44.9651	47.1588	23.9647	63.7566	55.4577	0.198439	0.917322	1.04502	-0.353998	0.242258	8802
(2568237,2574269)(2790300,2800279)(2790279,2800279)	NC_044998.1	2795279	31.5448	37.1389	17.0816	39.2761	38.2075	0.717146	1.11561	1.00989	-0.06481	0.218267	6032
(2574270,2584103)(2800280,2810280)(2800280,2810280)	NC_044998.1	2805280	43.6248	47.7347	27.5155	58.871	53.3028	0.383035	0.823422	0.825309	-0.244766	0.230238	9833
(2584104,2593162)(2810281,2820281)(2810281,2820281)	NC_044998.1	2815281	40.365	44.8414	19.4164	40.8945	42.868	0.45037	1.11607	1.1563	0.09371	0.064295	9058
(2593163,2602940)(2820282,2830282)(2820282,2830282)	NC_044998.1	2825282	43.6604	52.028	19.6666	74.44	63.234	0.779217	1.31687	1.22828	-0.492198	0.465276	9777
(2602941,2612681)(2830283,2840283)(2830283,2840283)	NC_044998.1	2835283	41.2603	42.9113	25.2086	53.5468	48.2291	0.162552	0.760811	0.867563	-0.24707	0.175172	9740
(2612682,2618366)(2840284,2850284)(2840284,2850284)	NC_044998.1	2845284	31.4934	38.8706	11.3394	41.8133	40.342	0.94725	1.5337	1.40943	-0.089383	0.290343	5684
(2618367,2627666)(2850285,2860285)(2850285,2860285)	NC_044998.1	2855285	46.2417	51.6725	25.7805	66.038	58.8552	0.477873	0.996632	0.991109	-0.297976	0.28327	9299
(2627667,2637006)(2860286,2870286)(2860286,2870286)	NC_044998.1	2865286	50.2996	54.8035	30.8895	71.2588	63.0311	0.364737	0.848379	0.866909	-0.313933	0.26308	9339
(2637007,2646451)(2870287,2880287)(2870287,2880287)	NC_044998.1	2875287	71.0032	85.9769	26.2624	101.889	93.9332	0.862127	1.51355	1.42978	-0.215393	0.336618	9444
(2646452,2655410)(2880288,2890288)(2880288,2890288)	NC_044998.1	2885288	47.735	48.0059	30.9471	56.2343	52.1201	0.0231	0.636711	0.788649	-0.165368	0.09543	8958
(2655411,2665004)(2890289,2900289)(2890289,2900289)	NC_044998.1	2895289	53.8204	57.2064	11.6354	80.1324	68.6694	0.256473	1.51379	1.76476	-0.408911	0.286945	9593
(2665005,2674003)(2900290,2910290)(2900290,2910290)	NC_044998.1	2905290	59.6373	67.6829	26.3622	70.5941	69.1385	0.550603	1.24202	1.26016	-0.046882	0.165844	8998
(2674004,2683736)(2910291,2920291)(2910291,2920291)	NC_044998.1	2915291	56.5687	59.8089	39.8029	85.7447	72.7768	0.233637	0.633114	0.668337	-0.440226	0.298125	9732
(2683737,2693225)(2920292,2930292)(2920292,2930292)	NC_044998.1	2925292	49.7162	51.1628	34.3462	59.2412	55.202	0.118506	0.603386	0.694247	-0.155919	0.114674	9488
(2693226,2702199)(2930293,2940293)(2930293,2940293)	NC_044998.1	2935293	55.5821	59.5398	31.8142	65.7204	62.6301	0.29039	0.892579	0.963762	-0.106761	0.13192	8973
(2702200,2711912)(2940294,2950294)(2940294,2950294)	NC_044998.1	2945294	55.9082	65.9879	24.225	72.262	69.125	0.735298	1.33685	1.27746	-0.107747	0.24595	9712
(2711913,2721025)(2950295,2960295)(2950295,2960295)	NC_044998.1	2955295	55.5642	61.5356	35.9825	71.8152	66.6754	0.438271	0.822895	0.794265	-0.177623	0.208037	9112
(2721026,2729696)(2960296,2970296)(2960296,2970296)	NC_044998.1	2965296	31.077	32.2355	22.0681	52.6231	42.4293	0.150708	0.573648	0.638015	-0.627487	0.377406	8670
(2729697,2739482)(2970297,2980297)(2970297,2980297)	NC_044998.1	2975297	45.6	48.4579	35.0602	60.483	54.4704	0.254966	0.522732	0.517452	-0.25292	0.201982	9785
(2739483,2748799)(2980298,2990298)(2980298,2990298)	NC_044998.1	2985298	46.3363	53.965	11.2023	74.0835	64.0243	0.669929	1.64277	1.69849	-0.416461	0.396429	9316
(2748800,2758134)(2990299,3000299)(2990299,3000299)	NC_044998.1	2995299	55.8703	61.6391	20.9598	61.8077	61.7234	0.42111	1.30302	1.4085	-0.002898	0.108994	9334
(2758135,2767188)(3000300,3010300)(3000300,3010300)	NC_044998.1	3005300	49.1587	58.3983	18.9008	65.1811	61.7897	0.765399	1.43279	1.38168	-0.13239	0.267002	9053
(2767189,2776657)(3010301,3020301)(3010301,3020301)	NC_044998.1	3015301	49.8558	56.3903	21.5354	57.9674	57.1788	0.533836	1.24721	1.27574	-0.030355	0.152656	9468
(2776658,2786323)(3020302,3030302)(3020302,3030302)	NC_044998.1	3025302	35.467	38.9823	10.2122	50.8295	44.9059	0.401661	1.43032	1.57749	-0.319836	0.275485	9665
(2786324,2795931)(3030303,3040303)(3030303,3040303)	NC_044998.1	3035303	42.448	48.5134	17.6105	61.2232	54.8683	0.580725	1.29221	1.30634	-0.287049	0.303574	9607
(2795932,2805655)(3040304,3050304)(3040304,3050304)	NC_044998.1	3045304	44.6566	47.9012	30.9167	74.0175	60.9593	0.295496	0.676224	0.688273	-0.560832	0.378976	9723
(2805656,2815178)(3050305,3060305)(3050305,3060305)	NC_044998.1	3055305	50.3362	51.7873	40.9556	75.7229	63.7551	0.117428	0.383999	0.418673	-0.456312	0.277084	9522
(2815179,2824595)(3060306,3070306)(3060306,3070306)	NC_044998.1	3065306	60.6719	67.1624	32.4235	79.711	73.4367	0.436675	1.0268	1.05207	-0.198655	0.21904	9416
(2824596,2834226)(3070307,3080307)(3070307,3080307)	NC_044998.1	3075307	55.2138	63.4183	18.8143	75.0146	69.2165	0.605951	1.44527	1.4855	-0.201638	0.263823	9630
(2834227,2843438)(3080308,3090330)(3080308,3090308)	NC_044998.1	3085308	51.0685	53.4596	35.6592	67.1361	60.2978	0.190753	0.622253	0.678207	-0.257012	0.187868	9211
(2843438,2852902)(3090330,3100309)(3090309,3100309)	NC_044998.1	3095309	49.4759	53.9739	27.3398	77.4086	65.6912	0.370246	0.960148	1.00456	-0.45449	0.340592	9464
(2852903,2861857)(3100310,3110789)(3100310,3110310)	NC_044998.1	3105310	41.9069	45.7694	28.3678	54.675	50.2222	0.37452	0.736732	0.720928	-0.20371	0.205834	8954
(2861857,2869276)(3110789,3120311)(3110311,3120311)	NC_044998.1	3115311	39.9013	44.6758	17.48	65.4049	55.0404	0.485854	1.20718	1.25137	-0.497843	0.393351	7419
(2869277,2878082)(3120312,3131147)(3120312,3130312)	NC_044998.1	3125312	37.9844	38.7498	32.8976	49.7319	44.2408	0.08175	0.272388	0.297605	-0.276971	0.170656	8805
(2878082,2885885)(3131147,3140313)(3130313,3140313)	NC_044998.1	3135313	35.7045	41.4035	24.5143	44.5294	42.9665	0.646931	0.834292	0.694537	-0.083833	0.21056	7803
(2885886,2895676)(3140314,3150314)(3140314,3150314)	NC_044998.1	3145314	47.3378	54.5488	20.097	52.1791	53.3639	0.62002	1.29635	1.29005	0.048022	0.132231	9790
(2895677,2904678)(3150315,3160315)(3150315,3160315)	NC_044998.1	3155315	42.718	42.4193	28.9897	50.7303	46.5748	-0.02842	0.558135	0.717665	-0.186522	0.093678	9001
(2904679,2913125)(3160316,3170316)(3160316,3170316)	NC_044998.1	3165316	46.195	47.0312	22.1579	68.4885	57.7599	0.073657	0.958362	1.16545	-0.445527	0.259982	8446
(2913126,2922824)(3170317,3180317)(3170317,3180317)	NC_044998.1	3175317	58.2588	73.4712	23.1988	72.8102	73.1407	1.06543	1.54594	1.35825	0.010896	0.265859	9698
(2922825,2932455)(3180318,3190318)(3180318,3190318)	NC_044998.1	3185318	55.6403	62.0878	29.2765	78.3318	70.2098	0.472583	1.05523	1.06794	-0.280299	0.272419	9630
(2932456,2942116)(3190319,3200319)(3190319,3200319)	NC_044998.1	3195319	39.99	45.2492	27.3879	55.7215	50.4854	0.534016	0.791141	0.701849	-0.250954	0.2721	9660
(2942117,2950684)(3200320,3210320)(3200320,3210320)	NC_044998.1	3205320	59.9521	62.6414	39.8088	69.0358	65.8386	0.183088	0.682788	0.758961	-0.102438	0.102214	8567
(2950685,2959965)(3210321,3220519)(3210321,3220321)	NC_044998.1	3215321	53.8774	57.0925	22.461	67.1623	62.1274	0.243276	1.14922	1.31292	-0.179417	0.159258	9280
(2959965,2969545)(3220519,3230322)(3220322,3230322)	NC_044998.1	3225322	70.9819	75.0957	56.9711	91.6581	83.3769	0.236929	0.459528	0.447871	-0.224255	0.182016	9580
(2969546,2979340)(3230323,3240323)(3230323,3240323)	NC_044998.1	3235323	56.6433	67.9592	20.1668	76.7459	72.3525	0.814884	1.51051	1.45221	-0.148946	0.288571	9794
(2979341,2988253)(3240324,3250326)(3240324,3250324)	NC_044998.1	3245324	42.4333	51.526	14.3232	56.6716	54.0988	0.870876	1.55617	1.47896	-0.116251	0.285223	8912
(2988253,2997411)(3250326,3260325)(3250325,3260325)	NC_044998.1	3255325	47.1775	56.1362	18.2746	69.8995	63.0179	0.77288	1.42935	1.37324	-0.279856	0.348756	9158
(2997412,3006708)(3260326,3270501)(3260326,3270326)	NC_044998.1	3265326	48.1972	50.2149	25.5191	101.31	75.7626	0.170434	0.913182	1.05549	-1.01708	0.594197	9296
(3006708,3016411)(3270501,3280327)(3270327,3280327)	NC_044998.1	3275327	58.9927	69.5103	19.458	79.226	74.3682	0.727557	1.5205	1.51311	-0.158164	0.271287	9703
(3016412,3025752)(3280328,3290328)(3280328,3290328)	NC_044998.1	3285328	50.3886	56.3621	27.4086	59.6353	57.9987	0.482911	1.0254	1.0246	-0.062337	0.156979	9340
(3025753,3035590)(3290329,3300329)(3290329,3300329)	NC_044998.1	3295329	42.0645	49.5572	24.2894	53.4374	51.4973	0.723828	1.06589	0.943076	-0.088428	0.232632	9837
(3035591,3045346)(3300330,3310330)(3300330,3310330)	NC_044998.1	3305330	43.4378	46.1219	32.3621	60.8699	53.4959	0.251217	0.562698	0.569777	-0.325538	0.2403	9755
(3045347,3055122)(3310331,3320331)(3310331,3320331)	NC_044998.1	3315331	48.3797	49.4663	32.5298	71.4847	60.4755	0.091444	0.623976	0.73501	-0.436644	0.259762	9775
(3055123,3064911)(3320332,3330332)(3320332,3330332)	NC_044998.1	3325332	48.2828	53.2736	21.2496	49.4068	51.3402	0.420832	1.18212	1.25604	0.076835	0.065789	9788
(3064912,3074757)(3330333,3340333)(3330333,3340333)	NC_044998.1	3335333	55.4115	67.3034	12.8092	77.6263	72.4648	0.875187	1.7596	1.73263	-0.17886	0.320165	9845
(3074758,3084562)(3340334,3350334)(3340334,3350334)	NC_044998.1	3345334	57.6601	61.0286	32.2468	61.4848	61.2567	0.238342	0.894035	0.994451	-0.007596	0.064912	9804
(3084563,3094449)(3350335,3360335)(3350335,3360335)	NC_044998.1	3355335	46.7705	51.962	26.6347	55.3207	53.6413	0.451719	0.964216	0.964722	-0.068886	0.152577	9886
(3094450,3103831)(3360336,3370338)(3360336,3370336)	NC_044998.1	3365336	43.7844	46.8716	19.3088	54.2856	50.5786	0.286689	1.11853	1.24953	-0.162363	0.16105	9381
(3103831,3112974)(3370338,3380337)(3370337,3380337)	NC_044998.1	3375337	55.4288	58.2148	40.2871	62.4809	60.3479	0.204974	0.578707	0.615626	-0.073893	0.092323	9143
(3112975,3122878)(3380338,3390338)(3380338,3390338)	NC_044998.1	3385338	54.2805	60.4832	25.8177	85.1803	72.8317	0.465886	1.14203	1.18094	-0.436785	0.355476	9903
(3122879,3132754)(3390339,3400339)(3390339,3400339)	NC_044998.1	3395339	62.2226	73.4572	31.831	89.8241	81.6406	0.737211	1.20044	1.10447	-0.252672	0.32497	9875
(3132755,3142644)(3400340,3410340)(3400340,3410340)	NC_044998.1	3405340	27.9399	26.4838	25.9765	22.2819	24.3829	-0.210218	0.031681	0.153759	0.143711	-0.1313	9889
(3142645,3152519)(3410341,3420341)(3410341,3420341)	NC_044998.1	3415341	43.2821	48.1942	26.236	56.118	52.1561	0.461374	0.901087	0.879947	-0.175531	0.212765	9874
(3152520,3162270)(3420342,3430342)(3420342,3430342)	NC_044998.1	3425342	54.4281	67.3807	14.2047	62.9463	65.1635	0.970283	1.74723	1.66451	0.078215	0.205159	9750
(3162271,3171259)(3430343,3440343)(3430343,3440343)	NC_044998.1	3435343	42.7432	50.379	14.2409	57.9003	54.1397	0.726106	1.50104	1.48915	-0.168699	0.276646	8988
(3171260,3180617)(3440344,3450344)(3440344,3450344)	NC_044998.1	3445344	54.3064	61.6314	21.4808	79.846	70.7387	0.549928	1.32212	1.36132	-0.321985	0.314726	9357
(3180618,3189657)(3450345,3462988)(3450345,3460345)	NC_044998.1	3455345	47.3818	48.1518	29.7966	65.7727	56.9622	0.066139	0.690045	0.832039	-0.356758	0.210031	9039
(3189657,3195940)(3462988,3470346)(3460346,3470346)	NC_044998.1	3465346	33.6994	38.4388	23.3938	54.3685	46.4036	0.569427	0.785554	0.675828	-0.452431	0.389959	6283
(3195941,3204838)(3470347,3480347)(3470347,3480347)	NC_044998.1	3475347	43.6582	46.1113	25.4055	55.874	50.9927	0.228455	0.842616	0.934431	-0.214412	0.174353	8897
(3204839,3213773)(3480348,3490348)(3480348,3490348)	NC_044998.1	3485348	42.0942	42.0754	32.4135	66.1824	54.1289	-0.001811	0.407299	0.513274	-0.548996	0.296593	8934
(3213774,3223465)(3490349,3500349)(3490349,3500349)	NC_044998.1	3495349	53.1424	56.2145	30.3706	70.345	63.2797	0.235632	0.869146	0.964397	-0.255233	0.198373	9691
(3223466,3232473)(3500350,3510350)(3500350,3510350)	NC_044998.1	3505350	46.8938	51.2963	32.3163	59.7784	55.5373	0.382076	0.720732	0.696649	-0.173508	0.191443	9007
(3232474,3242310)(3510351,3520351)(3510351,3520351)	NC_044998.1	3515351	50.3475	56.3055	22.7395	85.8161	71.0608	0.482035	1.18969	1.23192	-0.562469	0.427608	9836
(3242311,3250978)(3520352,3530352)(3520352,3530352)	NC_044998.1	3525352	41.2084	40.4137	25.0483	69.4329	54.9233	-0.078342	0.661168	0.874482	-0.674977	0.34518	8667
(3250979,3259450)(3530353,3540364)(3530353,3540353)	NC_044998.1	3535353	46.5078	54.2639	20.2019	64.1399	59.2019	0.678647	1.30385	1.26719	-0.203687	0.283469	8471
(3259450,3266057)(3540364,3550437)(3540354,3550354)	NC_044998.1	3545354	36.9245	45.7302	12.8598	55.536	50.6331	0.967119	1.57215	1.44649	-0.254352	0.384522	6607
(3266057,3274862)(3550437,3560355)(3550355,3560355)	NC_044998.1	3555355	54.5467	60.3929	28.7386	67.8557	64.1243	0.436996	1.03788	1.06573	-0.131343	0.182637	8805
(3274863,3284650)(3560356,3570356)(3560356,3570356)	NC_044998.1	3565356	54.2353	59.9116	29.5339	95.9165	77.914	0.426702	1.00159	1.0257	-0.637299	0.454105	9787
(3284651,3294507)(3570357,3580357)(3570357,3580357)	NC_044998.1	3575357	52.618	57.9852	33.9359	60.9262	59.4557	0.415731	0.816631	0.798824	-0.053648	0.135126	9856
(3294508,3304190)(3580358,3590358)(3580358,3590358)	NC_044998.1	3585358	59.5286	68.3226	35.3475	62.2159	65.2692	0.602905	0.992931	0.91739	0.098523	0.100385	9682
(3304191,3313405)(3590359,3600359)(3590359,3600359)	NC_044998.1	3595359	43.6129	52.7747	26.6393	54.5651	53.6699	0.854093	1.06464	0.869816	-0.039364	0.23932	9214
(3313406,3322583)(3600360,3610360)(3600360,3610360)	NC_044998.1	3605360	47.2234	52.391	28.2361	63.5498	57.9704	0.445392	0.911034	0.901281	-0.226677	0.236389	9177
(3322584,3331785)(3610361,3620361)(3610361,3620361)	NC_044998.1	3615361	41.7133	45.6998	25.702	60.7672	53.2335	0.388302	0.850438	0.856365	-0.346249	0.286474	9201
(3331786,3341491)(3620362,3630362)(3620362,3630362)	NC_044998.1	3625362	41.94	43.7765	25.8565	59.9108	51.8436	0.177929	0.758099	0.855763	-0.368774	0.244959	9705
(3341492,3351147)(3630363,3640363)(3630363,3640363)	NC_044998.1	3635363	38.2982	46.665	9.6225	53.186	49.9255	0.886471	1.71051	1.66451	-0.163123	0.31459	9655
(3351148,3360963)(3640364,3650364)(3640364,3650364)	NC_044998.1	3645364	49.7255	59.8977	18.7271	78.2578	69.0778	0.83317	1.47695	1.39991	-0.354296	0.404461	9815
(3360964,3368798)(3650365,3660367)(3650365,3660365)	NC_044998.1	3655365	48.127	54.2067	15.9501	59.414	56.8104	0.514296	1.41663	1.4997	-0.103804	0.187448	7834
(3368798,3378289)(3660367,3670366)(3660366,3670366)	NC_044998.1	3665366	57.2677	66.4793	27.5212	84.3127	75.396	0.656199	1.21822	1.17175	-0.299021	0.32941	9491
(3378290,3388007)(3670367,3680367)(3670367,3680367)	NC_044998.1	3675367	61.9056	73.5916	23.4953	78.6893	76.1405	0.770723	1.45193	1.40283	-0.079099	0.239438	9717
(3388008,3395474)(3680368,3690368)(3680368,3690368)	NC_044998.1	3685368	34.498	42.8429	11.1257	51.5585	47.2007	0.979823	1.61931	1.49895	-0.24185	0.381012	7466
(3395475,3405392)(3690369,3700369)(3690369,3700369)	NC_044998.1	3695369	46.6729	57.4753	20.6554	76.1147	66.795	0.941883	1.40458	1.24903	-0.383077	0.447767	9917
(3405393,3414100)(3700370,3710370)(3700370,3710370)	NC_044998.1	3705370	38.1914	40.7554	30.2727	64.312	52.5337	0.272415	0.485368	0.46088	-0.590901	0.389122	8707
(3414101,3423064)(3710371,3720371)(3710371,3720371)	NC_044998.1	3715371	41.1741	50.7611	11.6732	60.6956	55.7284	0.945874	1.68328	1.59767	-0.231264	0.366606	8963
(3423065,3432253)(3720372,3730372)(3720372,3730372)	NC_044998.1	3725372	46.5864	53.6885	26.1065	66.2935	59.991	0.620381	1.05408	0.984945	-0.259535	0.298833	9188
(3432254,3442059)(3730373,3740373)(3730373,3740373)	NC_044998.1	3735373	58.6465	65.9617	26.5285	78.4877	72.2247	0.508986	1.20481	1.23629	-0.205114	0.240979	9805
(3442060,3451590)(3740374,3750374)(3740374,3750374)	NC_044998.1	3745374	50.0706	59.3629	36.6765	75.4084	67.3857	0.755917	0.808405	0.600862	-0.307507	0.359413	9530
(3451591,3460877)(3750375,3760375)(3750375,3760375)	NC_044998.1	3755375	39.0765	46.826	25.5687	51.3759	49.101	0.804978	0.962766	0.769127	-0.111564	0.26589	9286
(3460878,3470702)(3760376,3770376)(3760376,3770376)	NC_044998.1	3765376	76.9582	88.3032	46.0453	107.945	98.124	0.603066	0.989801	0.91317	-0.245367	0.286831	9824
(3470703,3480399)(3770377,3780377)(3770377,3780377)	NC_044998.1	3775377	67.6771	78.0763	33.7283	93.4194	85.7479	0.627901	1.1781	1.13685	-0.217852	0.278227	9696
(3480400,3490074)(3780378,3790378)(3780378,3790378)	NC_044998.1	3785378	57.4342	67.466	18.8466	85.6629	76.5645	0.712574	1.51603	1.51574	-0.304235	0.346617	9674
(3490075,3498573)(3790379,3800549)(3790379,3800379)	NC_044998.1	3795379	34.4346	35.5598	23.4242	43.4137	39.4867	0.132353	0.620668	0.707367	-0.21834	0.151813	8498
(3498573,3507607)(3800549,3810380)(3800380,3810380)	NC_044998.1	3805380	45.7354	53.1482	15.0251	67.2683	60.2082	0.659409	1.48317	1.50342	-0.296108	0.328587	9034
(3507608,3517240)(3810381,3820381)(3810381,3820381)	NC_044998.1	3815381	49.2797	58.7391	24.2062	68.3618	63.5505	0.781709	1.24971	1.14223	-0.187361	0.30093	9632
(3517241,3525569)(3820382,3830693)(3820382,3830382)	NC_044998.1	3825382	32.8542	37.296	9.08301	45.1261	41.211	0.547149	1.50937	1.59698	-0.228063	0.263017	8328
(3525569,3533974)(3830693,3840383)(3830383,3840383)	NC_044998.1	3835383	25.4108	25.1518	22.7455	38.8343	31.9931	-0.041015	0.164389	0.22818	-0.514047	0.266697	8405
(3533975,3543607)(3840384,3850384)(3840384,3850384)	NC_044998.1	3845384	47.1312	47.812	31.9407	78.557	63.1845	0.058791	0.599742	0.722416	-0.625761	0.353788	9632
(3543608,3552703)(3850385,3860385)(3850385,3860385)	NC_044998.1	3855385	53.7033	60.8	31.577	85.5864	73.1932	0.538707	0.972801	0.927583	-0.443053	0.377442	9095
(3552704,3560890)(3860386,3870386)(3860386,3870386)	NC_044998.1	3865386	45.1419	52.0379	16.3819	55.2017	53.6198	0.621386	1.40484	1.42576	-0.067216	0.194983	8186
(3560891,3570566)(3870387,3880387)(3870387,3880387)	NC_044998.1	3875387	50.5826	52.2974	36.9427	63.2949	57.7961	0.138098	0.541766	0.605903	-0.208643	0.148232	9675
(3570567,3580241)(3880388,3890388)(3880388,3890388)	NC_044998.1	3885388	53.8564	61.1944	28.5795	75.063	68.1287	0.555454	1.08271	1.05675	-0.247197	0.275618	9674
(3580242,3589076)(3890389,3900389)(3890389,3900389)	NC_044998.1	3895389	56.9291	64.2869	37.8798	76.8409	70.5639	0.527221	0.830532	0.754703	-0.211746	0.249219	8834
(3589077,3598629)(3900390,3910390)(3900390,3910390)	NC_044998.1	3905390	55.2751	60.6305	21.0997	99.5881	80.1093	0.395096	1.27951	1.39323	-0.676655	0.467386	9552
(3598630,3608526)(3910391,3920391)(3910391,3920391)	NC_044998.1	3915391	34.0807	41.8239	6.53465	57.2362	49.5301	0.920106	1.82282	1.7872	-0.432876	0.46899	9896
(3608527,3618444)(3920392,3930392)(3920392,3930392)	NC_044998.1	3925392	41.4544	45.1139	24.3045	61.2563	53.1851	0.358646	0.890287	0.922756	-0.373254	0.293509	9917
(3618445,3624641)(3930393,3940521)(3930393,3940393)	NC_044998.1	3935393	34.8762	42.5368	12.505	55.7113	49.124	0.889893	1.51731	1.41992	-0.361649	0.422789	6196
(3624641,3633910)(3940521,3950484)(3940394,3950394)	NC_044998.1	3945394	29.4767	34.7683	15.1885	35.999	35.3837	0.724969	1.16183	1.06381	-0.039915	0.206861	9269
(3633910,3643714)(3950484,3960395)(3950395,3960395)	NC_044998.1	3955395	45.7166	56.0337	13.1573	62.2725	59.1531	0.918133	1.66876	1.59457	-0.130885	0.305182	9804
(3643715,3653496)(3960396,3970396)(3960396,3970396)	NC_044998.1	3965396	46.2831	49.6548	22.0144	68.1727	58.9137	0.296427	1.06301	1.17453	-0.383767	0.283406	9781
(3653497,3663406)(3970397,3980397)(3970397,3980397)	NC_044998.1	3975397	50.3157	57.1069	24.7384	66.1934	61.6501	0.549792	1.14796	1.142	-0.173297	0.234136	9909
(3663407,3670858)(3980398,3990398)(3980398,3990398)	NC_044998.1	3985398	38.2628	40.8768	18.0534	41.1207	40.9988	0.277211	1.05486	1.17411	-0.006108	0.074093	7451
(3670859,3679564)(3990399,4000399)(3990399,4000399)	NC_044998.1	3995399	46.4953	50.9552	30.3474	65.1135	58.0343	0.390336	0.789045	0.77807	-0.292085	0.257743	8705
(3679565,3689487)(4000400,4010400)(4000400,4010400)	NC_044998.1	4005400	45.5825	45.9601	35.2086	58.7153	52.3377	0.033694	0.41964	0.509494	-0.268381	0.153876	9922
(3689488,3699388)(4010401,4020401)(4010401,4020401)	NC_044998.1	4015401	39.7739	45.7347	23.5539	58.4486	52.0917	0.608491	0.98761	0.90804	-0.306316	0.32106	9900
(3699389,3708108)(4020402,4030402)(4020402,4030402)	NC_044998.1	4025402	40.4992	43.2918	32.5125	63.1576	53.2247	0.280047	0.471662	0.439442	-0.47011	0.325819	8719
(3708109,3717833)(4030403,4040403)(4030403,4040403)	NC_044998.1	4035403	40.2125	42.6949	22.9321	44.8855	43.7902	0.250685	0.870691	0.957293	-0.052206	0.092247	9724
(3717834,3726283)(4040404,4050404)(4040404,4050404)	NC_044998.1	4045404	31.6083	34.8932	14.3339	51.5771	43.2351	0.420277	1.14133	1.20389	-0.504938	0.380136	8449
(3726284,3735827)(4050405,4060405)(4050405,4060405)	NC_044998.1	4055405	37.6506	39.2802	24.6816	58.3526	48.8164	0.175576	0.685277	0.765177	-0.485242	0.307233	9543
(3735828,3745604)(4060406,4070550)(4060406,4070406)	NC_044998.1	4065406	47.4705	58.7799	19.6982	57.3209	58.0504	0.969731	1.46658	1.31167	0.029483	0.231513	9776
(3745604,3755015)(4070550,4080407)(4070407,4080407)	NC_044998.1	4075407	45.8875	47.691	25.7731	53.8965	50.7938	0.159911	0.849973	0.981554	-0.129706	0.111026	9411
(3755016,3764649)(4080408,4090408)(4080408,4090408)	NC_044998.1	4085408	53.2824	56.9235	33.5682	63.113	60.0183	0.278558	0.783447	0.832781	-0.111505	0.131469	9633
(3764650,3773102)(4090409,4100409)(4090409,4100409)	NC_044998.1	4095409	47.035	46.5036	28.5038	62.1701	54.3369	-0.045976	0.681523	0.883027	-0.319512	0.161247	8452
(3773103,3781551)(4100410,4110410)(4100410,4110410)	NC_044998.1	4105410	41.5262	45.1215	20.7829	64.4293	54.7754	0.351759	1.03954	1.11425	-0.445679	0.330938	8448
(3781552,3791247)(4110411,4120411)(4110411,4120411)	NC_044998.1	4115411	39.9426	42.2087	25.7049	51.4111	46.8099	0.230366	0.731847	0.793842	-0.220782	0.178248	9695
(3791248,3799953)(4120412,4130412)(4120412,4130412)	NC_044998.1	4125412	57.5693	56.8559	31.3996	94.9567	75.9063	-0.050557	0.791952	1.02562	-0.635523	0.331471	8705
(3799954,3809799)(4130413,4140413)(4130413,4140413)	NC_044998.1	4135413	51.0086	60.6767	13.2885	58.186	59.4314	0.772198	1.65846	1.66206	0.046859	0.17165	9845
(3809800,3819362)(4140414,4150414)(4140414,4150414)	NC_044998.1	4145414	40.8788	40.2884	38.7614	47.9662	44.1273	-0.058667	0.066217	0.115467	-0.180015	0.082411	9562
(3819363,3829072)(4150415,4160415)(4150415,4160415)	NC_044998.1	4155415	40.2534	38.8488	25.8009	74.5156	56.6822	-0.141698	0.574292	0.799857	-0.849152	0.423176	9709
(3829073,3839024)(4160416,4170416)(4160416,4170416)	NC_044998.1	4165416	36.7288	42.4533	14.0108	49.6576	46.0554	0.632007	1.36734	1.37248	-0.18786	0.262984	9951
(3839025,3848909)(4170417,4180417)(4170417,4180417)	NC_044998.1	4175417	41.1548	55.1563	13.6168	62.4998	58.8281	1.38206	1.78967	1.49204	-0.171028	0.445378	9884
(3848910,3858855)(4180418,4190418)(4180418,4190418)	NC_044998.1	4185418	41.7387	45.1501	21.3855	70.8553	58.0027	0.332092	1.01003	1.08795	-0.590349	0.404198	9945
(3858856,3867355)(4190419,4215703)(4190419,4200419)	NC_044998.1	4195419	43.8682	45.002	15.1444	71.4209	58.2114	0.105093	1.20942	1.46372	-0.577463	0.339351	8499
(3867355,3867355)(4215703,4215703)(4200420,4210420)	NC_044998.1	4205420	0	0	0	0	0	0					0
(3867355,3871090)(4215703,4220421)(4210421,4220421)	NC_044998.1	4215421	23.3771	26.4323	11.1789	31.0674	28.7499	0.524978	1.12742	1.12903	-0.18912	0.23624	3735
(3871091,3879009)(4220422,4230422)(4220422,4230422)	NC_044998.1	4225422	45.1123	50.0105	18.8666	63.1983	56.6044	0.441657	1.22784	1.30194	-0.280356	0.264478	7918
(3879010,3888273)(4230423,4240423)(4230423,4240423)	NC_044998.1	4235423	41.7579	49.5272	19.5476	56.1733	52.8502	0.755977	1.27361	1.1867	-0.152566	0.275544	9263
(3888274,3897549)(4240424,4250424)(4240424,4250424)	NC_044998.1	4245424	55.2788	60.4269	17.0554	77.4482	68.9376	0.379779	1.40373	1.55815	-0.295623	0.257045	9275
(3897550,3906328)(4250425,4260425)(4250425,4260425)	NC_044998.1	4255425	50.4087	55.922	27.1204	62.1963	59.0592	0.445529	1.01963	1.03795	-0.119442	0.178367	8778
(3906329,3915281)(4260426,4270426)(4260426,4270426)	NC_044998.1	4265426	47.9958	55.4015	20.4766	70.9251	63.1633	0.628155	1.29668	1.28599	-0.310296	0.328308	8952
(3915282,3923827)(4270427,4280427)(4270427,4280427)	NC_044998.1	4275427	57.8299	57.1938	35.5632	66.0145	61.6041	-0.04488	0.669977	0.868838	-0.14647	0.067921	8545
(3923828,3933727)(4280428,4290428)(4280428,4290428)	NC_044998.1	4285428	59.3217	69.5554	17.0852	73.989	71.7722	0.704032	1.58533	1.60781	-0.071778	0.218471	9899
(3933728,3943071)(4290429,4300429)(4290429,4300429)	NC_044998.1	4295429	37.735	43.388	17.5921	51.1011	47.2445	0.607737	1.20829	1.1859	-0.195802	0.261083	9343
(3943072,3952496)(4300430,4310430)(4300430,4310430)	NC_044998.1	4305430	49.2878	50.6154	30.7873	67.5997	59.1075	0.109691	0.717445	0.842665	-0.330641	0.207035	9424
(3952497,3962321)(4310431,4320431)(4310431,4320431)	NC_044998.1	4315431	39.8579	45.7333	20.8093	60.8589	53.2961	0.598522	1.10749	1.06424	-0.363659	0.349534	9824
(3962322,3971078)(4320432,4331641)(4320432,4330432)	NC_044998.1	4325432	44.0402	56.6924	10.1616	66.2138	61.4531	1.1682	1.87766	1.71992	-0.20731	0.410385	8756
(3971078,3978532)(4331641,4340433)(4330433,4340433)	NC_044998.1	4335433	50.9002	57.1506	29.9211	77.571	67.3608	0.500275	0.954932	0.926304	-0.385007	0.336162	7454
(3978533,3987475)(4340434,4350434)(4340434,4350434)	NC_044998.1	4345434	52.2486	56.2852	29.6004	64.3612	60.3232	0.314843	0.912349	0.975034	-0.148356	0.160685	8942
(3987476,3996830)(4350435,4360435)(4350435,4360435)	NC_044998.1	4355435	66.754	71.2843	31.7936	99.8352	85.5597	0.27728	1.06325	1.1865	-0.410968	0.293516	9354
(3996831,4006284)(4360436,4370436)(4360436,4370436)	NC_044998.1	4365436	42.674	50.5335	23.2477	51.4291	50.9813	0.748569	1.13513	1.01654	-0.020122	0.201981	9453
(4006285,4015860)(4370437,4380437)(4370437,4380437)	NC_044998.1	4375437	51.9581	58.4777	36.0976	66.2555	62.3666	0.511323	0.769329	0.686505	-0.143673	0.208278	9575
[truncated: 103,265 more rows]

## Sheet: BFGeneThetas
Chr	RefSeq	Start	End	Gene	ThetaW	Pi	S	TajD	Isoform	nExons	AvgExonsThetaW	AvgExonsPi	AvgExonsS	AvgExonsTajD	nIntrons	AvgIntronsThetaW	AvgIntronsPi	AvgIntronsS	AvgIntronsTajD
[truncated: 18,903 more rows]

[truncated: 1 more sheets: WBMGeneThetas]
