# Supplementary material for: To Tame a Songbird: The Genomics of the Domestication Syndrome in a Songbird Model Species
Source: Research Square preprint supplement (doi:10.21203/rs.3.rs-4921127/v1), 2025-04-11
Supplement: Supplementary file 2 [file 75e1ac33b027b4c5f5bda703.xlsx]

## Sheet: BFWinSwp
Chr	RefSeq	midPos	Alpha	CLR
1	NC_044998.1	15001	6.42347	0.00023905
1	NC_044998.1	25002	0	0.571429
1	NC_044998.1	35003	0.403801	0.0109342
1	NC_044998.1	45004	0.520725	0.0445842
1	NC_044998.1	55005	1.1201	0.0281921
1	NC_044998.1	65006	0	0.631579
1	NC_044998.1	75007	0.329412	0.016875
1	NC_044998.1	85008	0	6
1	NC_044998.1	95009	1.97072	0.0030065
1	NC_044998.1	105010	5.17	0.00119312
1	NC_044998.1	115011	0.185902	0.0836263
1	NC_044998.1	125012	0.528813	0.00873377
1	NC_044998.1	135013	3.01347	0.00108641
1	NC_044998.1	145014	0.661278	0.0058668
1	NC_044998.1	155015	0.005454	0.380171
1	NC_044998.1	165016	0.024407	0.151125
1	NC_044998.1	175017	7.02566	0.000987478
1	NC_044998.1	185018	1.34434	0.00811225
1	NC_044998.1	195019	0	6
1	NC_044998.1	205020	0.111071	0.0797368
1	NC_044998.1	215021	0	1200
1	NC_044998.1	225022	0.224997	0.0803206
1	NC_044998.1	235023	1.56079	0.00690528
1	NC_044998.1	245024	1.16956	0.00518522
1	NC_044998.1	255025	0.427691	0.00337248
1	NC_044998.1	265026	0.191743	0.0712153
1	NC_044998.1	275027	0	4
1	NC_044998.1	285028	0.383871	0.0136002
1	NC_044998.1	295029	0.057927	0.21274
1	NC_044998.1	305030	1.6487	0.00391933
1	NC_044998.1	315031	3.88252	0.00179193
1	NC_044998.1	325032	0.852934	0.0125904
1	NC_044998.1	335033	0.601846	0.036667
1	NC_044998.1	345034	0.021595	283.471
1	NC_044998.1	355035	0.467249	0.0473176
1	NC_044998.1	365036	0.207802	0.0956172
1	NC_044998.1	375037	1.06046	0.00967294
1	NC_044998.1	385038	0.526598	0.00316954
1	NC_044998.1	395039	0.767266	0.0208871
1	NC_044998.1	405040	0.024177	0.808142
1	NC_044998.1	415041	0.036643	0.169568
1	NC_044998.1	425042	5.81994	0.00304655
1	NC_044998.1	435043	0	12
1	NC_044998.1	445044	2.13194	0.0107315
1	NC_044998.1	455045	2.4792	0.00270441
1	NC_044998.1	465046	1.77777	0.00918335
1	NC_044998.1	475047	0.747705	0.0419444
1	NC_044998.1	485048	8.41872	0.000156032
1	NC_044998.1	495049	0.664448	0.0421545
1	NC_044998.1	505050	0.560037	0.118501
1	NC_044998.1	515051	10.7313	0.000148184
1	NC_044998.1	525052	0	3
1	NC_044998.1	535053	0.052591	0.0137131
1	NC_044998.1	545054	5.74348	0.000492662
1	NC_044998.1	555055	2.48011	0.00214064
1	NC_044998.1	565056	2.09081	0.00130377
1	NC_044998.1	575057	2.99897	0.00218104
1	NC_044998.1	585058	0.583394	0.0583015
1	NC_044998.1	595059	0.722071	5.54328e-05
1	NC_044998.1	605060	13.9351	0.000356141
1	NC_044998.1	615061	57.2031	5.11898e-05
1	NC_044998.1	625062	1.70922	0.00744735
1	NC_044998.1	635063	13.5115	0.000512988
1	NC_044998.1	645064	1.05717	0.0331308
1	NC_044998.1	655065	1.83087	0.00102948
1	NC_044998.1	665066	0.108234	0.00102505
1	NC_044998.1	675067	0	1.5
1	NC_044998.1	685068	1.3683	0.00696843
1	NC_044998.1	695069	0.047597	0.167595
1	NC_044998.1	705070	0.029907	0.0615997
1	NC_044998.1	715071	0.674078	0.00897379
1	NC_044998.1	725072	0.293355	0.0398599
1	NC_044998.1	735073	0.358882	0.030444
1	NC_044998.1	745074	0.308131	0.0848369
1	NC_044998.1	755075	0	4
1	NC_044998.1	765076	0.125061	0.433193
1	NC_044998.1	775077	0	1.09091
1	NC_044998.1	785078	0.483221	0.0179126
1	NC_044998.1	795079	0.544115	0.0221931
1	NC_044998.1	805080	0.132993	0.0968109
1	NC_044998.1	815081	0.350766	0.0110591
1	NC_044998.1	825082	0.042385	0.811999
1	NC_044998.1	835083	0	0.923077
1	NC_044998.1	845084	0.007575	0.0724918
1	NC_044998.1	855085	0	4
1	NC_044998.1	865086	7.7138	0.00138057
1	NC_044998.1	875087	0.014661	0.249011
1	NC_044998.1	885088	0.288463	0.0318677
1	NC_044998.1	895089	1.74177	0.00382093
1	NC_044998.1	905090	0.024249	0.242216
1	NC_044998.1	915091	0.713361	0.0719405
1	NC_044998.1	925092	0.021595	2.83471
1	NC_044998.1	935093	0.013799	0.216163
1	NC_044998.1	945094	0.243641	0.00498955
1	NC_044998.1	955095	0	2
1	NC_044998.1	965096	0.306745	0.0948081
1	NC_044998.1	975097	0	0.266667
1	NC_044998.1	985098	0.027999	0.085638
1	NC_044998.1	995099	1.19469	0.00604182
1	NC_044998.1	1005100	1.33152	0.00329007
1	NC_044998.1	1015101	0	1.5
1	NC_044998.1	1025102	0.556429	0.0373317
1	NC_044998.1	1035103	0.288605	0.016044
1	NC_044998.1	1045104	3.05179	0.00431519
1	NC_044998.1	1055105	0.43163	0.429504
1	NC_044998.1	1065106	0.11773	0.00168152
1	NC_044998.1	1075107	0.664258	0.0319302
1	NC_044998.1	1085108	1.6868	0.00707436
1	NC_044998.1	1095109	1.10773	0.00356374
1	NC_044998.1	1105110	0.489268	0.0319997
1	NC_044998.1	1115111	0	2
1	NC_044998.1	1125112	0.272286	0.022251
1	NC_044998.1	1135113	7.04453	0.00111295
1	NC_044998.1	1145114	0.541182	0.00556929
1	NC_044998.1	1155115	0	4
1	NC_044998.1	1165116	0.025569	0.171456
1	NC_044998.1	1175117	0.193527	0.00626684
1	NC_044998.1	1185118	0.582567	0.0287718
1	NC_044998.1	1195119	0.392535	0.0629594
1	NC_044998.1	1205120	0	0.0666667
1	NC_044998.1	1215121	0	6
1	NC_044998.1	1225122	0.011626	0.2156
1	NC_044998.1	1235123	0.09233	0.0983688
1	NC_044998.1	1245124	2.25612	0.00483351
1	NC_044998.1	1255125	0.595051	0.00372444
1	NC_044998.1	1265126	0.572318	0.0288152
1	NC_044998.1	1275127	0.307942	0.0935917
1	NC_044998.1	1285128	1.42642	0.00474382
1	NC_044998.1	1295129	0	0.374352
1	NC_044998.1	1305130	0.106228	0.0493199
1	NC_044998.1	1315131	0.084961	0.215517
1	NC_044998.1	1325132	0.010098	0.821998
1	NC_044998.1	1335133	0.002504	0.00961558
1	NC_044998.1	1345134	3.40185	0.00390671
1	NC_044998.1	1355135	0.466133	0.0185961
1	NC_044998.1	1365136	0	1
1	NC_044998.1	1375137	0.315216	0.0160371
1	NC_044998.1	1385138	0	3
1	NC_044998.1	1395139	0.394992	0.0462983
1	NC_044998.1	1405140	0	2.4
1	NC_044998.1	1415141	2.89657	0.00437716
1	NC_044998.1	1425142	0.073984	0.099468
1	NC_044998.1	1435143	1.06405	0.0094923
1	NC_044998.1	1445144	2.69161	0.00691707
1	NC_044998.1	1455145	0.013796	1.72938
1	NC_044998.1	1465146	0.397526	0.0542356
1	NC_044998.1	1475147	0.521789	0.00715308
1	NC_044998.1	1485148	0.964663	0.0209948
1	NC_044998.1	1495149	0	0.324325
1	NC_044998.1	1505150	0.542	0.10412
1	NC_044998.1	1515151	4.42869	0.00303653
1	NC_044998.1	1525152	3.32894	0.00129898
1	NC_044998.1	1535153	2.26137	0.00693982
1	NC_044998.1	1545154	0.041012	0.295445
1	NC_044998.1	1555155	0.524464	0.0104771
1	NC_044998.1	1565156	0.129587	0.0777533
1	NC_044998.1	1575157	0.956562	0.0526274
1	NC_044998.1	1585158	0.665011	0.00942378
1	NC_044998.1	1595159	0	12
1	NC_044998.1	1605160	0	0.27907
1	NC_044998.1	1615161	0.031936	0.0166094
1	NC_044998.1	1625162	0.044368	1.06811
1	NC_044998.1	1635163	0.127162	0.102754
1	NC_044998.1	1645164	4.85641	0.00149142
1	NC_044998.1	1655165	1.06303	0.0127952
1	NC_044998.1	1665166	0.078461	0.00742214
1	NC_044998.1	1675167	0.998073	0.00522565
1	NC_044998.1	1685168	0.27719	0.0403066
1	NC_044998.1	1695169	0.755391	0.0557257
1	NC_044998.1	1705170	0	2
1	NC_044998.1	1715171	5.05746	0.00317872
1	NC_044998.1	1725172	0.064161	0.21915
1	NC_044998.1	1735173	0	0.857143
1	NC_044998.1	1745174	0	0.208785
1	NC_044998.1	1755175	1.71823	0.00503054
1	NC_044998.1	1765176	0.751468	0.0321117
1	NC_044998.1	1775177	0.322748	0.0707319
1	NC_044998.1	1785178	0.03253	0.279856
1	NC_044998.1	1795179	0.484246	0.0131038
1	NC_044998.1	1805180	0.28247	0.155019
1	NC_044998.1	1815181	1.53892	0.00178359
1	NC_044998.1	1825182	0.374524	0.0549209
1	NC_044998.1	1835183	0.024621	0.126663
1	NC_044998.1	1845184	0.091925	0.120389
1	NC_044998.1	1855185	0.115933	0.019586
1	NC_044998.1	1865186	0	1.5
1	NC_044998.1	1875187	0	0.461539
1	NC_044998.1	1885188	1.01202	0.0113153
1	NC_044998.1	1895189	3.19946	0.00327688
1	NC_044998.1	1905190	1.4e-05	0.145018
1	NC_044998.1	1915191	0	1.2
1	NC_044998.1	1925192	0.264898	0.0672759
1	NC_044998.1	1935193	2.48287	0.00275048
1	NC_044998.1	1945194	5.70061	0.0030593
1	NC_044998.1	1955195	0.582618	0.00834135
1	NC_044998.1	1965196	0.074191	0.153359
1	NC_044998.1	1975197	4.21289	0.00107235
1	NC_044998.1	1985198	0	0.75
1	NC_044998.1	1995199	0.340522	0.00389936
1	NC_044998.1	2005200	5.21366	0.00296375
1	NC_044998.1	2015201	0	1200
1	NC_044998.1	2025202	0	0.363636
1	NC_044998.1	2035203	38.2963	6.15925e-05
1	NC_044998.1	2045204	2.21341	0.00271618
1	NC_044998.1	2055205	0.182917	0.0731035
1	NC_044998.1	2065206	0	0.521739
1	NC_044998.1	2075207	1.39812	0.0261917
1	NC_044998.1	2085208	0.693837	0.0177873
1	NC_044998.1	2095209	0.023022	0.0799577
1	NC_044998.1	2105210	2.24553	0.00648714
1	NC_044998.1	2115211	0.016194	0.567638
1	NC_044998.1	2125212	0.25225	0.00595735
1	NC_044998.1	2135213	7.52966	0.0017721
1	NC_044998.1	2145214	0.055031	0.0921682
1	NC_044998.1	2155215	0.471973	0.0407002
1	NC_044998.1	2165216	0.002909	0.0316096
1	NC_044998.1	2175217	1.99777	0.00771515
1	NC_044998.1	2185218	0.336442	0.126075
1	NC_044998.1	2195219	1.63166	0.019371
1	NC_044998.1	2205220	0.08155	0.0647805
1	NC_044998.1	2215221	0.118772	0.09936
1	NC_044998.1	2225222	1.21905	0.03309
1	NC_044998.1	2235223	1.02609	0.0115709
1	NC_044998.1	2245224	1.63901	0.0233974
1	NC_044998.1	2255225	0.94529	0.00272442
1	NC_044998.1	2265226	0.965959	0.0196103
1	NC_044998.1	2275227	0.916167	0.0161831
1	NC_044998.1	2285228	0.773564	0.0992232
1	NC_044998.1	2295229	0.541531	0.00601935
1	NC_044998.1	2305230	0.146365	0.234283
1	NC_044998.1	2315231	1.74481	0.00302561
1	NC_044998.1	2325232	0.338588	0.0510811
1	NC_044998.1	2335233	3.27178	0.00387395
1	NC_044998.1	2345234	1.54555	0.00282088
1	NC_044998.1	2355235	0.973368	0.0067573
1	NC_044998.1	2365236	1.04793	0.0127861
1	NC_044998.1	2375237	0.323904	0.0331843
1	NC_044998.1	2385238	0.043702	0.126914
1	NC_044998.1	2395239	4.12807	0.00274624
1	NC_044998.1	2405240	0.035618	0.224816
1	NC_044998.1	2415241	2.0956	0.00487693
1	NC_044998.1	2425242	1.45508	0.012809
1	NC_044998.1	2435243	2.2307	0.00699054
1	NC_044998.1	2445244	0.983678	0.0370519
1	NC_044998.1	2455245	0.145442	0.639683
1	NC_044998.1	2465246	1.0773	0.0275856
1	NC_044998.1	2475247	0.658197	0.0910581
1	NC_044998.1	2485248	0.441181	0.320794
1	NC_044998.1	2495249	1.71339	0.00456898
1	NC_044998.1	2505250	7.29625	0.000581971
1	NC_044998.1	2515251	0.205461	0.0384947
1	NC_044998.1	2525252	0.019462	0.548034
1	NC_044998.1	2535253	1.78642	0.00593038
1	NC_044998.1	2545254	0.022818	0.384541
1	NC_044998.1	2555255	0.843571	0.154576
1	NC_044998.1	2565256	0.005913	0.136311
1	NC_044998.1	2575257	2.58831	0.0029787
1	NC_044998.1	2585258	0.380979	0.0335214
1	NC_044998.1	2595259	0.490661	0.00437467
1	NC_044998.1	2605260	2.67256	0.00150453
1	NC_044998.1	2615261	1.56718	0.00274239
1	NC_044998.1	2625262	0.119169	0.0426609
1	NC_044998.1	2635263	1.05557	0.0191304
1	NC_044998.1	2645264	0.850279	0.00515939
1	NC_044998.1	2655265	0	4
1	NC_044998.1	2665266	4.9576	0.00295659
1	NC_044998.1	2675267	0.191168	0.115175
1	NC_044998.1	2685268	0.007908	0.276637
1	NC_044998.1	2695269	0.144708	0.0225802
1	NC_044998.1	2705270	2.52417	0.00251813
1	NC_044998.1	2715271	0	12
1	NC_044998.1	2725272	0	2.4
1	NC_044998.1	2735273	0.024177	242.443
1	NC_044998.1	2745274	0.089115	0.126132
1	NC_044998.1	2755275	0.032418	0.310382
1	NC_044998.1	2765276	0.408943	1.35339
1	NC_044998.1	2775277	0	1.71429
1	NC_044998.1	2785278	0.278169	0.0108121
1	NC_044998.1	2795279	0.008084	0.0417234
1	NC_044998.1	2805280	0.003331	0.361626
1	NC_044998.1	2815281	1.46474	0.00818092
1	NC_044998.1	2825282	1.2151	0.0285083
1	NC_044998.1	2835283	4.14836	0.0012456
1	NC_044998.1	2845284	1.84289	0.00151859
1	NC_044998.1	2855285	0.302971	0.0208525
1	NC_044998.1	2865286	0.04251	0.0397439
1	NC_044998.1	2875287	0.040164	0.410119
1	NC_044998.1	2885288	1.20417	0.00199792
1	NC_044998.1	2895289	0.507831	0.0227675
1	NC_044998.1	2905290	1.7064	0.010168
1	NC_044998.1	2915291	0.384913	0.0703542
1	NC_044998.1	2925292	0.584165	0.0113049
1	NC_044998.1	2935293	0.081262	0.343299
1	NC_044998.1	2945294	1.21019	0.00923547
1	NC_044998.1	2955295	0.623524	0.0167866
1	NC_044998.1	2965296	1.98608	0.00119172
1	NC_044998.1	2975297	0.008118	0.248267
1	NC_044998.1	2985298	0.028621	0.0587548
1	NC_044998.1	2995299	0.2216	0.0213049
1	NC_044998.1	3005300	4.72756	0.0024921
1	NC_044998.1	3015301	0.150499	0.211675
1	NC_044998.1	3025302	0.073808	0.0199683
1	NC_044998.1	3035303	0.245817	0.0798036
1	NC_044998.1	3045304	0.630548	0.0393811
1	NC_044998.1	3055305	1.29407	0.037471
1	NC_044998.1	3065306	2.01932	0.00487964
1	NC_044998.1	3075307	0.782634	0.00961057
1	NC_044998.1	3085308	2.94442	0.00404293
1	NC_044998.1	3095309	0.730842	0.00825793
1	NC_044998.1	3105310	0.022818	0.640902
1	NC_044998.1	3115311	1.22944	0.0183333
1	NC_044998.1	3125312	1.99729	0.00642125
1	NC_044998.1	3135313	0.450771	0.0417336
1	NC_044998.1	3145314	4.06634	0.00263635
1	NC_044998.1	3155315	0.525101	0.00673657
1	NC_044998.1	3165316	0.000102	0.298379
1	NC_044998.1	3175317	0.928161	0.0421979
1	NC_044998.1	3185318	1.12301	0.0287632
1	NC_044998.1	3195319	0.728448	0.0227761
1	NC_044998.1	3205320	3.17942	0.0016576
1	NC_044998.1	3215321	0	4
1	NC_044998.1	3225322	0.815617	0.035901
1	NC_044998.1	3235323	0.270225	0.0194123
1	NC_044998.1	3245324	0	2
1	NC_044998.1	3255325	2.73738	0.00292562
1	NC_044998.1	3265326	0.262638	0.00474658
1	NC_044998.1	3275327	0.050501	100.947
1	NC_044998.1	3285328	0.48136	0.0149275
1	NC_044998.1	3295329	2.58942	0.00164818
1	NC_044998.1	3305330	1.89602	0.00971459
1	NC_044998.1	3315331	0.040985	0.229853
1	NC_044998.1	3325332	4.19835	0.00252253
1	NC_044998.1	3335333	0.013796	172.939
1	NC_044998.1	3345334	0.081328	0.342327
1	NC_044998.1	3355335	0.799635	0.00621356
1	NC_044998.1	3365336	0.072819	0.068154
1	NC_044998.1	3375337	0.391137	0.0493349
1	NC_044998.1	3385338	0.481676	0.00928487
1	NC_044998.1	3395339	5.68069	0.00200726
1	NC_044998.1	3405340	0.155515	0.0750196
1	NC_044998.1	3415341	0.114212	0.212154
1	NC_044998.1	3425342	0.021595	0.944905
1	NC_044998.1	3435343	0.121209	0.034893
1	NC_044998.1	3445344	1.74817	0.00399593
1	NC_044998.1	3455345	2.04012	0.00919235
1	NC_044998.1	3465346	0.22717	0.0876793
1	NC_044998.1	3475347	9e-05	0.104201
1	NC_044998.1	3485348	0.049253	0.165509
1	NC_044998.1	3495349	0.022818	1.92271
1	NC_044998.1	3505350	0.885799	0.0124199
1	NC_044998.1	3515351	0.457698	0.133442
1	NC_044998.1	3525352	0.230858	0.0158341
1	NC_044998.1	3535353	2.11441	0.00782645
1	NC_044998.1	3545354	0	0.0192308
1	NC_044998.1	3555355	0.096912	65.4973
1	NC_044998.1	3565356	0.092027	0.0153703
1	NC_044998.1	3575357	0.309542	0.0147655
1	NC_044998.1	3585358	0.245863	0.0515877
1	NC_044998.1	3595359	0.347744	0.0116038
1	NC_044998.1	3605360	0	1.33333
1	NC_044998.1	3615361	0.608271	0.0299685
1	NC_044998.1	3625362	0	3
1	NC_044998.1	3635363	0.791909	0.0145252
1	NC_044998.1	3645364	0.577008	0.0667282
1	NC_044998.1	3655365	0.066202	0.135352
1	NC_044998.1	3665366	0.207472	0.0614285
1	NC_044998.1	3675367	0	12
1	NC_044998.1	3685368	0.250907	0.0664818
1	NC_044998.1	3695369	0.951861	0.00612148
1	NC_044998.1	3705370	0	0.413793
1	NC_044998.1	3715371	0.091373	0.0867877
1	NC_044998.1	3725372	0.01441	0.0684452
1	NC_044998.1	3735373	0.009398	0.233365
1	NC_044998.1	3745374	0.025932	0.305781
1	NC_044998.1	3755375	1.51533	0.0030287
1	NC_044998.1	3765376	0.14707	0.176214
1	NC_044998.1	3775377	1.46593	0.01461
1	NC_044998.1	3785378	0.021921	0.969546
1	NC_044998.1	3795379	0.173943	0.0567543
1	NC_044998.1	3805380	0.034586	0.172695
1	NC_044998.1	3815381	0.698915	0.012789
1	NC_044998.1	3825382	4.04748	0.00465893
1	NC_044998.1	3835383	1.41452	0.00931311
1	NC_044998.1	3845384	0.659331	0.0961607
1	NC_044998.1	3855385	1.24316	0.00909763
1	NC_044998.1	3865386	0.251185	0.0216348
1	NC_044998.1	3875387	0.018313	0.0941717
1	NC_044998.1	3885388	0	2.4
1	NC_044998.1	3895389	1.42195	0.00515684
1	NC_044998.1	3905390	1.14347	0.00240376
1	NC_044998.1	3915391	0.000654	0.183774
1	NC_044998.1	3925392	0.108247	0.0546729
1	NC_044998.1	3935393	0.696609	0.00126176
1	NC_044998.1	3945394	3.901	0.0020809
1	NC_044998.1	3955395	4.6975	0.00156124
1	NC_044998.1	3965396	0.13837	0.120274
1	NC_044998.1	3975397	0.59845	0.00502014
1	NC_044998.1	3985398	1.02538	0.00542367
1	NC_044998.1	3995399	1.16455	0.0352864
1	NC_044998.1	4005400	0.160422	0.0382992
1	NC_044998.1	4015401	0.016631	0.565279
1	NC_044998.1	4025402	0.243223	0.0335828
1	NC_044998.1	4035403	0.092296	1.56157
1	NC_044998.1	4045404	0.017324	0.054618
1	NC_044998.1	4055405	2.70705	0.00273192
1	NC_044998.1	4065406	0.140335	0.0888929
1	NC_044998.1	4075407	0.021996	0.078156
1	NC_044998.1	4085408	0.866594	0.0120432
1	NC_044998.1	4095409	0	0.461539
1	NC_044998.1	4105410	0.013796	172.939
1	NC_044998.1	4115411	0.024176	0.202042
1	NC_044998.1	4125412	0	6
1	NC_044998.1	4135413	0.092296	0.156157
1	NC_044998.1	4145414	0.073614	0.211305
1	NC_044998.1	4155415	0.09523	0.514817
1	NC_044998.1	4165416	0.472271	0.0297648
1	NC_044998.1	4175417	1.13957	0.0080675
1	NC_044998.1	4185418	0	1.33333
1	NC_044998.1	4195419	0.094933	0.0550341
1	NC_044998.1	4215421	0	0.0392157
1	NC_044998.1	4225422	0.24169	0.0401561
1	NC_044998.1	4235423	0.107475	0.212776
1	NC_044998.1	4245424	0	4
1	NC_044998.1	4255425	0.587863	0.0749237
1	NC_044998.1	4265426	0	2.4
1	NC_044998.1	4275427	0.000272	0.106462
1	NC_044998.1	4285428	0.08329	0.056085
1	NC_044998.1	4295429	0.004282	0.0973045
1	NC_044998.1	4305430	0	0.923077
1	NC_044998.1	4315431	0.353557	0.0130014
1	NC_044998.1	4325432	0.461086	0.0232736
1	NC_044998.1	4335433	0.024244	0.269149
1	NC_044998.1	4345434	0.422609	0.0322009
1	NC_044998.1	4355435	0.03472	0.408322
1	NC_044998.1	4365436	2.42661	0.00212663
1	NC_044998.1	4375437	0.263837	0.0112775
1	NC_044998.1	4385438	0.202373	0.0214577
1	NC_044998.1	4395439	0.393312	0.0145415
1	NC_044998.1	4405440	0.386078	0.00605616
1	NC_044998.1	4415441	0	6
1	NC_044998.1	4425442	0.245027	0.0359875
1	NC_044998.1	4435443	4e-06	0.189922
1	NC_044998.1	4445444	0.313935	0.0219151
1	NC_044998.1	4455445	0.247965	0.0112638
1	NC_044998.1	4465446	0.469777	0.0241617
1	NC_044998.1	4475447	0	1200
1	NC_044998.1	4485448	0.024399	0.345482
1	NC_044998.1	4495449	0.878991	0.0129118
1	NC_044998.1	4505450	0.766675	0.0014806
1	NC_044998.1	4515451	0.020553	0.310616
1	NC_044998.1	4525452	0.76314	0.0152652
1	NC_044998.1	4535453	0.03199	84.278
1	NC_044998.1	4545454	0.210303	0.0221465
1	NC_044998.1	4555455	1.1258	0.00973354
1	NC_044998.1	4565456	3.93165	0.00561488
1	NC_044998.1	4575457	0.886603	0.0128255
1	NC_044998.1	4585458	1.12935	0.00644467
1	NC_044998.1	4595459	0.150393	0.13958
1	NC_044998.1	4605460	0.278558	0.0826519
1	NC_044998.1	4615461	0.364952	0.00893132
1	NC_044998.1	4625462	0.390624	0.0165733
1	NC_044998.1	4635463	1.21757	0.020978
1	NC_044998.1	4645464	3.35227	0.00128869
1	NC_044998.1	4655465	0.982388	0.00283988
1	NC_044998.1	4665466	0.113681	0.234389
1	NC_044998.1	4675467	0	1200
1	NC_044998.1	4685468	0.291262	0.0181803
1	NC_044998.1	4695469	0.095971	0.131412
1	NC_044998.1	4705470	0	6
1	NC_044998.1	4715471	0.778075	0.0412098
1	NC_044998.1	4725472	0.327982	0.00227656
1	NC_044998.1	4735473	3.2e-05	0.239717
1	NC_044998.1	4745474	0.005409	0.254414
1	NC_044998.1	4755475	0.311745	0.0137304
1	NC_044998.1	4765476	0.285277	0.0594073
1	NC_044998.1	4775477	0	2
1	NC_044998.1	4785478	0.133395	0.080592
1	NC_044998.1	4795479	0	6
1	NC_044998.1	4805480	0.336779	0.0336938
1	NC_044998.1	4815481	0	1.33333
1	NC_044998.1	4825482	1.68213	0.00244741
1	NC_044998.1	4835483	0.840196	0.226782
1	NC_044998.1	4845484	0.661833	0.099804
1	NC_044998.1	4855485	0.439561	0.0104838
1	NC_044998.1	4865486	0.874672	0.00601728
1	NC_044998.1	4875487	1.65248	0.00609461
1	NC_044998.1	4885488	0.232619	0.0791359
1	NC_044998.1	4895489	0.08059	0.00473153
1	NC_044998.1	4905490	0.909818	0.0344194
1	NC_044998.1	4915491	0.316577	0.0529874
1	NC_044998.1	4925492	0.347865	0.0496487
1	NC_044998.1	4935493	0.463203	0.0390436
1	NC_044998.1	4945494	0.269591	0.0253288
1	NC_044998.1	4955495	0.08468	0.223882
1	NC_044998.1	4965496	1.14365	0.000895643
1	NC_044998.1	4975497	0	12
1	NC_044998.1	4985498	0.364975	0.047845
1	NC_044998.1	4995499	0.004276	0.14337
1	NC_044998.1	5005500	0.439715	0.117253
1	NC_044998.1	5015501	0.000645	0.231825
1	NC_044998.1	5025502	0.378117	0.051526
1	NC_044998.1	5035503	0.067559	0.085674
1	NC_044998.1	5045504	0.347139	0.00267575
1	NC_044998.1	5055505	0.126298	0.110284
1	NC_044998.1	5065506	0.91287	0.00266018
1	NC_044998.1	5075507	0.065549	0.0088054
1	NC_044998.1	5085508	3.61792	0.00123849
1	NC_044998.1	5095509	0.371226	0.0223401
1	NC_044998.1	5105510	0.32741	0.0222934
1	NC_044998.1	5115511	2.0431	0.0100189
1	NC_044998.1	5125512	4.5468	0.00159879
1	NC_044998.1	5135513	1.60148	0.00499344
1	NC_044998.1	5145514	2.03816	0.00343447
1	NC_044998.1	5155515	2.73	0.00354655
1	NC_044998.1	5165516	0.205826	0.0431261
1	NC_044998.1	5175517	4.16881	0.00236922
1	NC_044998.1	5185518	0.7739	0.0194385
1	NC_044998.1	5195519	0.046089	0.118615
1	NC_044998.1	5205520	0.392665	0.0398967
1	NC_044998.1	5215521	0.028856	0.135541
1	NC_044998.1	5225522	1.04185	0.0219147
1	NC_044998.1	5235523	0.057663	0.992633
1	NC_044998.1	5245524	0.769904	30.0628
1	NC_044998.1	5255525	9.29758	0.000352802
1	NC_044998.1	5265526	0.513956	0.321485
1	NC_044998.1	5275527	0.096918	0.256346
1	NC_044998.1	5285528	0.016062	0.0948176
1	NC_044998.1	5295529	0.031299	0.0186181
1	NC_044998.1	5305530	0.171306	0.0172328
1	NC_044998.1	5315531	0.377849	0.0367459
1	NC_044998.1	5325532	0.77645	0.0165333
1	NC_044998.1	5335533	0.214557	0.0313499
1	NC_044998.1	5345534	2.32854	0.000761058
1	NC_044998.1	5355535	0.273876	0.0966043
1	NC_044998.1	5365536	1.67781	0.0114075
1	NC_044998.1	5375537	0.092296	1.56157
1	NC_044998.1	5385538	0	1.71429
1	NC_044998.1	5395539	0.288827	0.0342513
1	NC_044998.1	5405540	1.14728	0.00748103
1	NC_044998.1	5415541	0.225603	0.0271096
1	NC_044998.1	5425542	0.359648	0.267599
1	NC_044998.1	5435543	2.79421	0.00217466
1	NC_044998.1	5445544	0.905043	0.0277678
1	NC_044998.1	5455545	0.262424	0.0309518
1	NC_044998.1	5465546	0.761173	0.00565699
1	NC_044998.1	5475547	0.041102	0.344439
1	NC_044998.1	5485548	0.087644	0.138665
1	NC_044998.1	5495549	0.307198	0.0298791
1	NC_044998.1	5505550	0.901247	0.0195188
1	NC_044998.1	5515551	0	0.6
1	NC_044998.1	5525552	0	12
1	NC_044998.1	5535553	4.68639	0.00467284
1	NC_044998.1	5545554	0.349006	0.063259
1	NC_044998.1	5555555	0.077087	0.0607648
1	NC_044998.1	5565556	0	2
1	NC_044998.1	5575557	0.012787	0.141374
1	NC_044998.1	5585558	0	1.71429
1	NC_044998.1	5595559	0.099458	0.102027
1	NC_044998.1	5605560	0.068706	0.127804
1	NC_044998.1	5615561	0	0.8
1	NC_044998.1	5625562	2.50331	0.00920384
1	NC_044998.1	5635563	0.469115	0.0118278
1	NC_044998.1	5645564	0.470632	0.990353
1	NC_044998.1	5655565	0.765969	0.00983902
1	NC_044998.1	5665566	0.185076	0.0318544
1	NC_044998.1	5675567	5.75139	0.00220221
1	NC_044998.1	5685568	1.58927	0.0161939
1	NC_044998.1	5695569	1.0575	0.00457291
1	NC_044998.1	5705570	0	4
1	NC_044998.1	5715571	0.103383	0.0234667
1	NC_044998.1	5725572	1.38563	0.00892043
1	NC_044998.1	5735573	0.45106	0.00876224
1	NC_044998.1	5745574	0.606002	0.0275292
1	NC_044998.1	5755575	0.186804	0.0508149
1	NC_044998.1	5765576	1.54343	0.00307322
1	NC_044998.1	5775577	0.011709	0.108628
1	NC_044998.1	5785578	0	0.521739
1	NC_044998.1	5795579	6.13002	0.000877656
1	NC_044998.1	5805580	0.083237	0.252382
1	NC_044998.1	5815581	0.179864	0.12634
1	NC_044998.1	5825582	0.169681	0.0419754
1	NC_044998.1	5835583	0.374809	0.0348003
1	NC_044998.1	5845584	0	2.4
1	NC_044998.1	5855585	0.76	0.00573268
1	NC_044998.1	5865586	0.032877	0.0973634
1	NC_044998.1	5875587	5.08438	0.00176435
1	NC_044998.1	5885588	0.612005	0.020283
1	NC_044998.1	5895589	0.635226	0.0142982
1	NC_044998.1	5905590	0.457351	0.0127314
1	NC_044998.1	5915591	1.76162	0.00666373
1	NC_044998.1	5925592	0.049838	0.97783
1	NC_044998.1	5935593	0.022181	0.187738
1	NC_044998.1	5945594	2.36987	0.0107183
1	NC_044998.1	5955595	0.013764	0.113888
1	NC_044998.1	5965596	0.420815	0.0105107
1	NC_044998.1	5975597	3.1986	0.0010925
1	NC_044998.1	5985598	0	12
1	NC_044998.1	5995599	2.33252	0.00560752
1	NC_044998.1	6005600	0.318118	0.037011
1	NC_044998.1	6015601	0.669661	0.0130636
1	NC_044998.1	6025602	0.00078	0.082279
1	NC_044998.1	6035603	4.3127	0.0021766
1	NC_044998.1	6045604	0	0.461539
1	NC_044998.1	6055605	0	0.571429
1	NC_044998.1	6065606	0	1.71429
1	NC_044998.1	6075607	0.679671	0.0159409
1	NC_044998.1	6085608	0.12652	0.0692038
1	NC_044998.1	6095609	0	4
1	NC_044998.1	6105610	0.428053	0.570248
1	NC_044998.1	6115611	0.142657	0.303047
1	NC_044998.1	6125612	1.6123	0.00486998
1	NC_044998.1	6135613	1.7993	0.00598683
1	NC_044998.1	6145614	0.273891	0.0270655
1	NC_044998.1	6155615	0.079103	0.0243597
1	NC_044998.1	6165616	0.022818	1.92271
1	NC_044998.1	6175617	1.12882	0.0145578
1	NC_044998.1	6185618	0.03868	0.230938
1	NC_044998.1	6195619	0.186708	0.0359563
1	NC_044998.1	6205620	0	1.2
1	NC_044998.1	6215621	0.362244	0.0625035
1	NC_044998.1	6225622	0.736554	0.0224618
1	NC_044998.1	6235623	0.339814	0.0726926
1	NC_044998.1	6245624	1.33733	0.0107452
1	NC_044998.1	6255625	0.016441	0.171757
1	NC_044998.1	6265626	0.012534	0.1427
1	NC_044998.1	6275627	0.024177	2.42443
1	NC_044998.1	6285628	0.019454	0.291273
1	NC_044998.1	6295629	2.24892	0.00770003
1	NC_044998.1	6305630	2.0979	0.0084783
1	NC_044998.1	6315631	1.08746	0.00738163
1	NC_044998.1	6325632	0.485357	0.00880519
1	NC_044998.1	6335633	0.026987	1.21487
1	NC_044998.1	6345634	0.66664	0.00670015
1	NC_044998.1	6355635	0.608989	0.00963774
1	NC_044998.1	6365636	0.926866	0.00781246
1	NC_044998.1	6375637	0	3
1	NC_044998.1	6385638	2.37522	0.00937015
1	NC_044998.1	6395639	0	3
1	NC_044998.1	6405640	1.75398	0.0573566
1	NC_044998.1	6415641	0	2
1	NC_044998.1	6425642	0.021596	1.4173
1	NC_044998.1	6435643	0.7039	0.020768
1	NC_044998.1	6445644	0.054428	0.0853616
1	NC_044998.1	6455645	0.064825	0.0496594
1	NC_044998.1	6465646	1.18258	0.00664768
1	NC_044998.1	6475647	0.031006	0.119697
1	NC_044998.1	6485648	0.050469	0.295077
1	NC_044998.1	6495649	0.042338	0.0867383
1	NC_044998.1	6505650	0.204905	0.043641
1	NC_044998.1	6515651	0	4
1	NC_044998.1	6525652	0.03448	0.142757
1	NC_044998.1	6535653	0.096135	0.0428516
1	NC_044998.1	6545654	0.234292	0.0201913
1	NC_044998.1	6555655	0.770779	0.0379553
1	NC_044998.1	6565656	0	1
1	NC_044998.1	6575657	1.355	0.0207407
1	NC_044998.1	6585658	0	12
1	NC_044998.1	6595659	0	0.857143
1	NC_044998.1	6605660	0.021582	0.257778
1	NC_044998.1	6615661	0.05672	0.0906587
1	NC_044998.1	6625662	0.023675	1.38941
1	NC_044998.1	6635663	0.206963	1.13017
1	NC_044998.1	6645664	0.213503	0.0611453
1	NC_044998.1	6655665	0.517595	0.0120435
1	NC_044998.1	6665666	1.22822	0.0105083
1	NC_044998.1	6675667	0.208563	0.559677
1	NC_044998.1	6685668	1.09904	0.135525
1	NC_044998.1	6695669	0.773389	0.00984241
1	NC_044998.1	6705670	0.021305	0.569754
1	NC_044998.1	6715671	1.19935	0.0135068
1	NC_044998.1	6725672	0.162799	0.0862766
1	NC_044998.1	6735673	0.021968	0.0578557
1	NC_044998.1	6745674	0.083423	0.231376
1	NC_044998.1	6755675	0.545609	0.0552692
1	NC_044998.1	6765676	0.117172	0.0475009
1	NC_044998.1	6775677	0.207357	0.101191
1	NC_044998.1	6785678	0.568406	0.0196926
1	NC_044998.1	6795679	1.03127	0.0139307
1	NC_044998.1	6805680	0.089414	0.0951499
1	NC_044998.1	6815681	0.1193	0.194876
1	NC_044998.1	6825682	0.030554	0.224507
1	NC_044998.1	6835683	0	12
1	NC_044998.1	6845684	0.087078	0.370291
1	NC_044998.1	6855685	0.099467	0.0419466
1	NC_044998.1	6865686	1.99411	0.0119614
1	NC_044998.1	6875687	1.47647	0.0261172
1	NC_044998.1	6885688	0	12
1	NC_044998.1	6895689	0.071322	0.113098
1	NC_044998.1	6905690	0.023731	0.954666
1	NC_044998.1	6915691	0.057847	0.449234
1	NC_044998.1	6925692	0.092293	0.780805
1	NC_044998.1	6935693	0.42772	0.0175754
1	NC_044998.1	6945694	0.014942	0.0777961
1	NC_044998.1	6955695	0.908902	0.0353381
1	NC_044998.1	6965696	1.0661	0.0115842
1	NC_044998.1	6975697	0.001126	0.131635
1	NC_044998.1	6985698	0	1.5
1	NC_044998.1	6995699	0.550107	0.00620539
1	NC_044998.1	7005700	2.44471	0.00345157
1	NC_044998.1	7015701	0.025946	0.122293
1	NC_044998.1	7025702	0.136541	0.0605158
1	NC_044998.1	7035703	2.02991	0.0131476
1	NC_044998.1	7045704	0.02961	0.243753
1	NC_044998.1	7055705	2.49833	0.00396086
1	NC_044998.1	7065706	0.021595	0.314968
1	NC_044998.1	7075707	0.092296	156.157
1	NC_044998.1	7085708	5.56265	0.00193884
1	NC_044998.1	7095709	0.176851	0.127495
1	NC_044998.1	7105710	0.519531	0.0227284
1	NC_044998.1	7115711	0.125754	0.42577
1	NC_044998.1	7125712	0.575166	0.0115811
1	NC_044998.1	7135713	0	0.0514003
1	NC_044998.1	7145714	0	0.0211268
1	NC_044998.1	7155715	3.80293	0.004177
1	NC_044998.1	7165716	0	0.0547945
1	NC_044998.1	7175717	1.82552	0.00878448
1	NC_044998.1	7185718	0.092296	156.157
1	NC_044998.1	7195719	0	2.4
1	NC_044998.1	7205720	0	12
1	NC_044998.1	7215721	0.365964	0.0356535
1	NC_044998.1	7225722	0	1.71429
1	NC_044998.1	7235723	0.424811	1.86016
1	NC_044998.1	7245724	0.886446	0.0142049
1	NC_044998.1	7255725	0.019751	0.403509
1	NC_044998.1	7265726	0	0.75
1	NC_044998.1	7275727	1.2439	0.0142737
1	NC_044998.1	7285728	0.447051	0.0302582
1	NC_044998.1	7295729	0.021595	2.83471
1	NC_044998.1	7305730	0.025901	1.22352
1	NC_044998.1	7315731	0	1.33333
1	NC_044998.1	7325732	0.013456	0.123889
1	NC_044998.1	7335733	0.056909	0.221768
1	NC_044998.1	7345734	1.17694	0.0093133
1	NC_044998.1	7355735	0.733533	0.111964
1	NC_044998.1	7365736	0.091197	0.0458504
1	NC_044998.1	7375737	0.214165	0.0467229
1	NC_044998.1	7385738	0.092297	0.520518
1	NC_044998.1	7395739	0.176865	0.102045
1	NC_044998.1	7405740	0.078353	1.10886
1	NC_044998.1	7415741	0.060015	0.298836
1	NC_044998.1	7425742	0.988596	0.023145
1	NC_044998.1	7435743	4.44649	0.00281352
1	NC_044998.1	7445744	0.071525	0.0243565
1	NC_044998.1	7455745	0.013435	0.120997
1	NC_044998.1	7465746	0.519413	0.041718
1	NC_044998.1	7475747	0.018881	0.0844471
1	NC_044998.1	7485748	0.16132	0.301566
1	NC_044998.1	7495749	0.046103	0.272624
1	NC_044998.1	7505750	0.000916	0.0876551
1	NC_044998.1	7515751	1.33387	0.00682208
1	NC_044998.1	7525752	0.718887	0.0432618
1	NC_044998.1	7535753	0.093228	0.0398627
1	NC_044998.1	7545754	0.81348	0.0165441
1	NC_044998.1	7555755	0.948555	0.0361023
1	NC_044998.1	7565756	0.000876	0.388509
1	NC_044998.1	7575757	1.38384	0.000672571
1	NC_044998.1	7585758	0	1.09091
1	NC_044998.1	7595759	0	1.5
1	NC_044998.1	7605760	0.433416	0.0250433
1	NC_044998.1	7615761	1.39946	0.00848881
1	NC_044998.1	7625762	1.83546	0.00609826
1	NC_044998.1	7635763	0.801155	0.00417962
1	NC_044998.1	7645764	1.25548	0.00632811
1	NC_044998.1	7655765	0.812271	0.026064
1	NC_044998.1	7665766	0.276962	0.0282387
1	NC_044998.1	7675767	0.836377	0.0133985
1	NC_044998.1	7685768	0.435874	0.0238886
1	NC_044998.1	7695769	0.313185	0.035349
1	NC_044998.1	7705770	0.105808	0.050891
1	NC_044998.1	7715771	0.788551	0.0861417
1	NC_044998.1	7725772	0.025644	0.467579
1	NC_044998.1	7735773	0	2
1	NC_044998.1	7745774	0.802054	0.0144178
1	NC_044998.1	7755775	0.589738	0.0212482
1	NC_044998.1	7765776	0	0.923077
1	NC_044998.1	7775777	0.532539	0.00384221
1	NC_044998.1	7785778	0.585129	37.7313
1	NC_044998.1	7795779	1.97447	0.00747339
1	NC_044998.1	7805780	0	2.4
1	NC_044998.1	7815781	0.606503	0.0369109
1	NC_044998.1	7825782	0.033527	0.0741563
1	NC_044998.1	7835783	0.25222	0.0298782
1	NC_044998.1	7845784	0.054322	0.0178301
1	NC_044998.1	7855785	0.024254	0.186314
1	NC_044998.1	7865786	0	0.272727
1	NC_044998.1	7875787	0.972646	0.0119274
1	NC_044998.1	7885788	1.19446	0.091545
1	NC_044998.1	7895789	0.203565	0.0304263
1	NC_044998.1	7905790	0.523927	0.020176
1	NC_044998.1	7915791	0	3
1	NC_044998.1	7925792	0.206986	1.12986
1	NC_044998.1	7935793	0	1.33333
1	NC_044998.1	7945794	1.60176	0.00676682
1	NC_044998.1	7955795	0.123042	0.135339
1	NC_044998.1	7965796	0.020578	0.320114
1	NC_044998.1	7975797	0.014605	0.437162
1	NC_044998.1	7985798	0.427526	0.0154462
1	NC_044998.1	7995799	0	1.5
1	NC_044998.1	8005800	0.018952	0.18673
1	NC_044998.1	8015801	0	0.857143
1	NC_044998.1	8025802	0.124115	0.0633462
1	NC_044998.1	8035803	0.129254	0.0607569
1	NC_044998.1	8045804	0.14561	0.0280817
1	NC_044998.1	8055805	0.210096	0.087362
1	NC_044998.1	8065806	0.189709	0.0795292
1	NC_044998.1	8075807	0.215825	0.00390772
1	NC_044998.1	8085808	0.028374	0.103904
1	NC_044998.1	8095809	1.41637	0.00333421
1	NC_044998.1	8105810	0.024177	1.21221
1	NC_044998.1	8115811	0.175011	0.0445251
1	NC_044998.1	8125812	0.533534	0.0188945
1	NC_044998.1	8135813	0.241684	0.262032
1	NC_044998.1	8145814	0	3
1	NC_044998.1	8155815	0.673276	0.0209825
1	NC_044998.1	8165816	0	1.09091
1	NC_044998.1	8175817	0.271965	0.0256332
1	NC_044998.1	8185818	0.087503	0.163314
1	NC_044998.1	8195819	0	0.31579
1	NC_044998.1	8205820	0.296385	0.0412228
1	NC_044998.1	8215821	0.023999	0.810218
1	NC_044998.1	8225822	0.450164	0.0139603
1	NC_044998.1	8235823	0.444552	0.035201
1	NC_044998.1	8245824	0.211447	0.00457292
1	NC_044998.1	8255825	0.380827	0.0723343
1	NC_044998.1	8265826	0.005409	0.763241
1	NC_044998.1	8275827	0.510964	0.011092
1	NC_044998.1	8285828	0.590076	0.170762
1	NC_044998.1	8295829	0.024177	0.808142
1	NC_044998.1	8305830	0.231646	0.0622495
1	NC_044998.1	8315831	0.050501	0.504735
1	NC_044998.1	8325832	0.316874	0.0359497
1	NC_044998.1	8335833	0.022817	0.240342
1	NC_044998.1	8345834	0.813821	0.00870129
1	NC_044998.1	8355835	0.057741	0.00537237
1	NC_044998.1	8365836	0.67215	0.0177848
1	NC_044998.1	8375837	0.081246	0.0880303
1	NC_044998.1	8385838	0.058239	0.177283
1	NC_044998.1	8395839	0.881746	0.0134643
1	NC_044998.1	8405840	0.024352	0.539173
1	NC_044998.1	8415841	0.900697	0.0290882
1	NC_044998.1	8425842	0.004807	0.130749
1	NC_044998.1	8435843	1.90353	0.0117012
1	NC_044998.1	8445844	0.43451	0.00283193
1	NC_044998.1	8455845	0.044708	0.0712832
1	NC_044998.1	8465846	0	2.4
1	NC_044998.1	8475847	0	6
1	NC_044998.1	8485848	0.126074	0.0605508
1	NC_044998.1	8495849	0.316727	0.00525279
1	NC_044998.1	8505850	0.275409	0.0661937
1	NC_044998.1	8515851	0	0.307692
1	NC_044998.1	8525852	0.267196	0.160285
1	NC_044998.1	8535853	0	3
1	NC_044998.1	8545854	0.057754	0.495966
1	NC_044998.1	8555855	0.690668	8.51162
1	NC_044998.1	8565856	0.360793	0.0956615
1	NC_044998.1	8575857	0.096912	0.654973
1	NC_044998.1	8585858	0	3
1	NC_044998.1	8595859	0.06131	0.1246
1	NC_044998.1	8605860	0.53525	0.00553625
1	NC_044998.1	8615861	1.11444	0.0184008
1	NC_044998.1	8625862	0.014968	0.0670452
1	NC_044998.1	8635863	0.34335	0.0528791
1	NC_044998.1	8645864	1.48668	0.00158815
1	NC_044998.1	8655865	0	0.045283
1	NC_044998.1	8665866	0.897553	0.0179777
1	NC_044998.1	8675867	2.89172	0.00316187
1	NC_044998.1	8685868	0.004218	0.057784
1	NC_044998.1	8695869	0.685707	0.0268313
1	NC_044998.1	8705870	0.903166	0.00426871
1	NC_044998.1	8715871	3.36717	0.000430359
1	NC_044998.1	8725872	0.379443	0.0293431
1	NC_044998.1	8735873	0.024177	2.42443
1	NC_044998.1	8745874	0.09126	0.0158332
1	NC_044998.1	8755875	0	1200
1	NC_044998.1	8765876	0.479668	0.0140865
1	NC_044998.1	8775877	1.75675	0.00268002
1	NC_044998.1	8785878	0.398832	0.122809
1	NC_044998.1	8795879	0.446909	0.0402461
1	NC_044998.1	8805880	0.022823	0.640859
1	NC_044998.1	8815881	0.048341	0.144754
1	NC_044998.1	8825882	0.032242	0.420511
1	NC_044998.1	8835883	0.478926	0.0138839
1	NC_044998.1	8845884	0	12
1	NC_044998.1	8855885	0.038174	0.0805099
1	NC_044998.1	8865886	1.57713	0.0145019
1	NC_044998.1	8875887	0.302081	0.00780312
1	NC_044998.1	8885888	0.021595	283.471
1	NC_044998.1	8895889	0	0.857143
1	NC_044998.1	8905890	0	0.184762
1	NC_044998.1	8915891	0.105355	0.116963
1	NC_044998.1	8925892	0.424821	0.699499
1	NC_044998.1	8935893	0.262869	0.00899415
1	NC_044998.1	8945894	0.701354	0.00504923
1	NC_044998.1	8955895	0.449374	0.030957
1	NC_044998.1	8965896	0.048239	0.0833909
1	NC_044998.1	8975897	0.273323	0.191895
1	NC_044998.1	8985898	0.215897	0.0577311
1	NC_044998.1	8995899	0.442942	0.0317384
1	NC_044998.1	9005900	0.606911	0.0525154
1	NC_044998.1	9015901	0	6
1	NC_044998.1	9025902	0.276701	0.146211
1	NC_044998.1	9035903	0.03544	0.293857
1	NC_044998.1	9045904	0.150095	0.144146
1	NC_044998.1	9055905	0.967598	0.00481436
1	NC_044998.1	9065906	0.840348	0.0638049
1	NC_044998.1	9075907	0.334452	0.0470933
1	NC_044998.1	9085908	1.03359	0.0229158
1	NC_044998.1	9095909	0	0.8
1	NC_044998.1	9105910	0.235794	0.0231249
1	NC_044998.1	9115911	0.432466	0.01171
1	NC_044998.1	9125912	1.12484	0.00858301
1	NC_044998.1	9135913	0.450062	0.00552179
1	NC_044998.1	9145914	0.050555	0.126696
1	NC_044998.1	9155915	0.031391	0.0652652
1	NC_044998.1	9165916	0.524452	0.0897372
1	NC_044998.1	9175917	0	0.428571
1	NC_044998.1	9185918	0.14692	0.0957857
1	NC_044998.1	9195919	0.021476	0.189445
1	NC_044998.1	9205920	0.266552	0.0428533
1	NC_044998.1	9215921	0.236648	0.143787
1	NC_044998.1	9225922	0.023413	0.310408
1	NC_044998.1	9235923	0	2.4
1	NC_044998.1	9245924	0.000755	0.324194
1	NC_044998.1	9255925	0.325064	0.276632
1	NC_044998.1	9265926	0.404255	0.107669
1	NC_044998.1	9275927	0.00204	1.3865
1	NC_044998.1	9285928	0	6
1	NC_044998.1	9295929	0	1.33333
1	NC_044998.1	9305930	1.54413	0.00279445
1	NC_044998.1	9315931	2.43039	0.00589702
1	NC_044998.1	9325932	0.022818	0.961353
1	NC_044998.1	9335933	1.01783	0.0106609
1	NC_044998.1	9345934	0	0.413793
1	NC_044998.1	9355935	0.037109	0.1027
1	NC_044998.1	9365936	0.024177	242.443
1	NC_044998.1	9375937	0.059978	0.0506802
1	NC_044998.1	9385938	0.070171	0.258497
1	NC_044998.1	9395939	0.543282	0.171561
1	NC_044998.1	9405940	1.15408	0.0274885
1	NC_044998.1	9415941	0.096699	0.0552877
1	NC_044998.1	9425942	0	2.4
1	NC_044998.1	9435943	0.721228	0.0300739
1	NC_044998.1	9445944	0.161432	0.15173
1	NC_044998.1	9455945	0	4
1	NC_044998.1	9465946	0.086143	0.0500608
1	NC_044998.1	9475947	0.105379	0.064545
1	NC_044998.1	9485948	0.014605	0.249807
1	NC_044998.1	9495949	2.97918	0.00581966
1	NC_044998.1	9505950	10.8447	8.47685e-05
1	NC_044998.1	9515951	0	2
1	NC_044998.1	9525952	0.103699	0.0577165
1	NC_044998.1	9535953	0.28819	0.0262735
1	NC_044998.1	9545954	3.90904	0.00181743
1	NC_044998.1	9555955	0.027139	0.136597
1	NC_044998.1	9565956	0.063841	0.0741643
1	NC_044998.1	9575957	0.334422	0.367944
1	NC_044998.1	9585958	0.773146	0.0605447
1	NC_044998.1	9595959	0.50379	0.0538644
1	NC_044998.1	9605960	0.249124	0.0660978
1	NC_044998.1	9615961	0.100278	0.00975763
1	NC_044998.1	9625962	0.013806	0.115989
1	NC_044998.1	9635963	0.712334	0.0175552
1	NC_044998.1	9645964	0.762229	0.0134521
1	NC_044998.1	9655965	0.476423	0.0745362
1	NC_044998.1	9665966	0.379217	0.0829833
1	NC_044998.1	9675967	0.398397	0.00486792
1	NC_044998.1	9685968	0.150901	0.0885943
1	NC_044998.1	9695969	0.487225	0.0111794
1	NC_044998.1	9705970	0.026987	0.036165
1	NC_044998.1	9715971	0.006641	0.373534
1	NC_044998.1	9725972	0.089668	0.22612
1	NC_044998.1	9735973	0.222974	0.0527718
1	NC_044998.1	9745974	0.434599	0.00346381
1	NC_044998.1	9755975	0.006592	0.020411
1	NC_044998.1	9765976	0.750375	0.038954
1	NC_044998.1	9775977	0.055688	0.123142
1	NC_044998.1	9785978	0.60445	0.0412275
1	NC_044998.1	9795979	0.651756	0.0238857
1	NC_044998.1	9805980	1.63174	0.00587246
1	NC_044998.1	9815981	0.638653	0.0165613
1	NC_044998.1	9825982	0.269254	0.0213249
1	NC_044998.1	9835983	0.738703	0.0822193
1	NC_044998.1	9845984	0.4212	0.0270153
1	NC_044998.1	9855985	0.182169	0.0592445
1	NC_044998.1	9865986	0	2.4
1	NC_044998.1	9875987	0	0.461539
1	NC_044998.1	9885988	1.20716	0.0164986
1	NC_044998.1	9895989	0.02491	1.23394
1	NC_044998.1	9905990	0.133368	0.165223
1	NC_044998.1	9915991	0.014434	0.385625
1	NC_044998.1	9925992	1.14186	0.0347881
1	NC_044998.1	9935993	0.216913	0.0575988
1	NC_044998.1	9945994	0.000635	0.0275363
1	NC_044998.1	9955995	0.303177	0.0255558
1	NC_044998.1	9965996	0.023857	0.198275
1	NC_044998.1	9975997	0.454361	0.012431
1	NC_044998.1	9985998	0.650189	0.00767607
1	NC_044998.1	9995999	0.211443	0.0605616
1	NC_044998.1	10006000	0.040007	0.160793
1	NC_044998.1	10016001	0.073889	0.0727343
1	NC_044998.1	10026002	0.161994	0.0134704
1	NC_044998.1	10036003	0.022818	0.320451
1	NC_044998.1	10046004	0.41348	0.0260427
1	NC_044998.1	10056005	2.41064	0.00363086
1	NC_044998.1	10066006	0.681405	0.03027
1	NC_044998.1	10076007	0.454738	0.0925192
1	NC_044998.1	10086008	0.232701	0.284148
1	NC_044998.1	10096009	2.13833	0.00481318
1	NC_044998.1	10106010	0.769913	0.0197095
1	NC_044998.1	10116011	0.20748	0.0681592
1	NC_044998.1	10126012	0.303107	0.0792274
1	NC_044998.1	10136013	0.000909	0.358146
1	NC_044998.1	10146014	0.115059	0.0308423
1	NC_044998.1	10156015	1.39294	0.00388237
1	NC_044998.1	10166016	0.651657	0.0226187
1	NC_044998.1	10176017	0	0.6
1	NC_044998.1	10186018	0.408058	2.63177
1	NC_044998.1	10196019	0.138546	0.0515618
1	NC_044998.1	10206020	0.724379	0.0325091
1	NC_044998.1	10216021	0.100435	0.0476943
1	NC_044998.1	10226022	0.095236	0.772193
1	NC_044998.1	10236023	0	3
1	NC_044998.1	10246024	0.707112	0.0178424
1	NC_044998.1	10256025	0.240843	0.130997
1	NC_044998.1	10266026	0.193223	0.0569172
1	NC_044998.1	10276027	0.964641	0.00612336
1	NC_044998.1	10286028	0.837004	0.0194556
1	NC_044998.1	10296029	0.993495	0.0147201
1	NC_044998.1	10306030	0.102208	0.144348
1	NC_044998.1	10316031	0.110314	0.0303556
1	NC_044998.1	10326032	0.663608	0.0391342
1	NC_044998.1	10336033	1.76735	0.00427272
1	NC_044998.1	10346034	0.801885	0.0423761
1	NC_044998.1	10356035	0.611824	0.0199161
1	NC_044998.1	10366036	0.205333	0.116978
1	NC_044998.1	10376037	0.509782	0.0411279
1	NC_044998.1	10386038	0.021595	0.472452
1	NC_044998.1	10396039	0	4
1	NC_044998.1	10406040	0.173986	0.0703999
1	NC_044998.1	10416041	0.098099	0.0642138
1	NC_044998.1	10426042	0.335716	0.050937
1	NC_044998.1	10436043	0.194647	0.0765698
1	NC_044998.1	10446044	4.46734	0.00156779
1	NC_044998.1	10456045	0.458279	0.0127975
1	NC_044998.1	10466046	0	0.428571
1	NC_044998.1	10476047	1.74171	0.0121122
1	NC_044998.1	10486048	0.3	0.0490515
1	NC_044998.1	10496049	3.22929	0.00251682
1	NC_044998.1	10506050	2.09084	0.00300807
1	NC_044998.1	10516051	0.12934	0.0273257
1	NC_044998.1	10526052	2.11525	0.00873155
1	NC_044998.1	10536053	0	1.2
1	NC_044998.1	10546054	0	0.75
1	NC_044998.1	10556055	0.013677	0.106932
1	NC_044998.1	10566056	1.86999	0.00592223
1	NC_044998.1	10576057	0	12
1	NC_044998.1	10586058	0.706069	0.0599492
1	NC_044998.1	10596059	2.18562	0.00323659
1	NC_044998.1	10606060	0.019142	0.152848
1	NC_044998.1	10616061	0.022761	0.0850361
1	NC_044998.1	10626062	0	6
1	NC_044998.1	10636063	1.44975	0.00245636
1	NC_044998.1	10646064	0.02607	0.203606
1	NC_044998.1	10656065	0.194593	0.149514
1	NC_044998.1	10666066	1.0195	0.00497488
1	NC_044998.1	10676067	0.040985	2.06868
1	NC_044998.1	10686068	1.24289	0.0100512
1	NC_044998.1	10696069	1.09463	0.00940019
1	NC_044998.1	10706070	0.063257	0.0310256
1	NC_044998.1	10716071	0.326793	0.0234329
1	NC_044998.1	10726072	0.078386	0.0499457
1	NC_044998.1	10736073	0.266956	0.0451638
1	NC_044998.1	10746074	0.314903	0.156187
1	NC_044998.1	10756075	0.025405	0.017932
1	NC_044998.1	10766076	0.12113	0.0933467
1	NC_044998.1	10776077	0	1.33333
1	NC_044998.1	10786078	0.049215	0.204112
1	NC_044998.1	10796079	0.202446	0.0302437
1	NC_044998.1	10806080	0.021595	0.218052
1	NC_044998.1	10816081	1.72111	0.0122124
1	NC_044998.1	10826082	0	4
1	NC_044998.1	10836083	0	1200
1	NC_044998.1	10846084	0.894301	0.0059851
1	NC_044998.1	10856085	0	0.272765
1	NC_044998.1	10866086	0.940992	0.0136787
1	NC_044998.1	10876087	0.759846	0.0290982
1	NC_044998.1	10886088	0.741527	0.0212294
1	NC_044998.1	10896089	0.003169	0.293739
1	NC_044998.1	10906090	0.443969	0.0054501
1	NC_044998.1	10916091	0.049652	0.017775
1	NC_044998.1	10926092	0.009616	0.146784
1	NC_044998.1	10936093	0.003015	0.286915
1	NC_044998.1	10946094	1e-06	0.740694
1	NC_044998.1	10956095	0.301798	0.0489483
1	NC_044998.1	10966096	0	0.521739
1	NC_044998.1	10976097	0	1.09091
1	NC_044998.1	10986098	2.15931	0.00625631
1	NC_044998.1	10996099	0.025166	0.057747
1	NC_044998.1	11006100	0.572477	0.0216051
1	NC_044998.1	11016101	0.021577	0.148374
1	NC_044998.1	11026102	1.96127	0.00399751
1	NC_044998.1	11036103	0.044237	0.254479
1	NC_044998.1	11046104	0.12914	0.37056
1	NC_044998.1	11056105	0.431801	0.00572493
1	NC_044998.1	11066106	0	1.5
1	NC_044998.1	11076107	0.162442	0.0239793
1	NC_044998.1	11086108	1.1805	0.00596819
1	NC_044998.1	11096109	0.040985	0.689559
1	NC_044998.1	11106110	0	0.387097
1	NC_044998.1	11116111	0.677355	0.0135056
1	NC_044998.1	11126112	0.499382	0.0895563
1	NC_044998.1	11136113	0	1
1	NC_044998.1	11146114	0.187357	0.044545
1	NC_044998.1	11156115	0.163505	0.181713
1	NC_044998.1	11166116	1.98224	0.00414826
1	NC_044998.1	11176117	4.53863	0.00251608
1	NC_044998.1	11186118	0.021595	1.41736
1	NC_044998.1	11196119	2.40297	0.00278821
1	NC_044998.1	11206120	0.051042	1.00546
1	NC_044998.1	11216121	0	0.666667
1	NC_044998.1	11226122	0	2
1	NC_044998.1	11236123	0.050501	0.504735
1	NC_044998.1	11246124	0.774716	0.0173806
1	NC_044998.1	11256125	0	3
1	NC_044998.1	11266126	0.670434	0.0101147
1	NC_044998.1	11276127	0.024177	242.443
1	NC_044998.1	11286128	2.19422	0.00494497
1	NC_044998.1	11296129	0.821471	0.00415306
1	NC_044998.1	11306130	0.132043	0.0143387
1	NC_044998.1	11316131	0.149508	0.167209
1	NC_044998.1	11326132	1.63993	0.00303397
1	NC_044998.1	11336133	0.149586	0.0538647
1	NC_044998.1	11346134	0.641857	0.00918265
1	NC_044998.1	11356135	0.145881	0.1237
1	NC_044998.1	11366136	0	3
1	NC_044998.1	11376137	0.493231	0.0263703
1	NC_044998.1	11386138	0.609818	0.0135892
1	NC_044998.1	11396139	0.003538	0.106367
1	NC_044998.1	11406140	0.751136	0.02076
1	NC_044998.1	11416141	0.423724	0.209203
1	NC_044998.1	11426142	0.036691	0.0276561
1	NC_044998.1	11436143	0.19479	0.0435304
1	NC_044998.1	11446144	0.521674	0.0247545
1	NC_044998.1	11456145	0.551266	0.0249338
1	NC_044998.1	11466146	2.68387	0.0039462
1	NC_044998.1	11476147	0.021595	2.83472
1	NC_044998.1	11486148	0	2
1	NC_044998.1	11496149	0	12
1	NC_044998.1	11506150	0.024736	0.475124
1	NC_044998.1	11516151	0.126776	0.226278
1	NC_044998.1	11526152	0.0236	0.191173
1	NC_044998.1	11536153	0.413618	0.00943062
1	NC_044998.1	11546154	0.414327	0.0313295
1	NC_044998.1	11556155	0.808283	0.0354803
1	NC_044998.1	11566156	0	1.09091
1	NC_044998.1	11576157	0	12
1	NC_044998.1	11586158	0.406905	0.0790292
1	NC_044998.1	11596159	0.040901	0.0862703
1	NC_044998.1	11606160	0.25972	0.013098
1	NC_044998.1	11616161	0	4
1	NC_044998.1	11626162	6.13067	0.00087811
1	NC_044998.1	11636163	0.997497	0.00352399
1	NC_044998.1	11646164	0.021595	283.471
1	NC_044998.1	11656165	1.26066	0.00624205
1	NC_044998.1	11666166	0.125949	0.0522164
1	NC_044998.1	11676167	0.04375	0.456964
1	NC_044998.1	11686168	0.458942	0.0162517
1	NC_044998.1	11696169	0.127319	0.0319547
1	NC_044998.1	11706170	0.021595	1.41736
1	NC_044998.1	11716171	0.024177	2.42443
1	NC_044998.1	11726172	0	2.4
1	NC_044998.1	11736173	0.528365	0.0167103
1	NC_044998.1	11746174	0.074268	0.702976
1	NC_044998.1	11756175	0.021595	0.708678
1	NC_044998.1	11766176	2.0401	0.0040684
1	NC_044998.1	11776177	1.45141	0.00624947
1	NC_044998.1	11786178	0	1.71429
1	NC_044998.1	11796179	0.282462	0.0756463
1	NC_044998.1	11806180	0.040994	0.258557
1	NC_044998.1	11816181	1.58031	0.0288915
1	NC_044998.1	11826182	0.581508	0.120962
1	NC_044998.1	11836183	0.739558	0.0105865
1	NC_044998.1	11846184	0.302709	0.0140853
1	NC_044998.1	11856185	0.907202	0.0117791
1	NC_044998.1	11866186	0.049927	0.0693466
1	NC_044998.1	11876187	0	0.333334
1	NC_044998.1	11886188	0.317544	0.0244539
1	NC_044998.1	11896189	1.16576	0.00511821
1	NC_044998.1	11906190	0.391368	0.0615696
1	NC_044998.1	11916191	1.06296	0.00803429
1	NC_044998.1	11926192	1.51568	0.0103115
1	NC_044998.1	11936193	0	12
1	NC_044998.1	11946194	0	12
1	NC_044998.1	11956195	0	6
1	NC_044998.1	11966196	0	1200
1	NC_044998.1	11976197	0	0.6
1	NC_044998.1	11986198	0.048595	0.251467
1	NC_044998.1	11996199	0.521536	0.0404534
1	NC_044998.1	12006200	0.437236	0.0198736
1	NC_044998.1	12016201	0.03199	84.2779
1	NC_044998.1	12026202	0.045635	0.183718
1	NC_044998.1	12036203	0.075589	0.487916
1	NC_044998.1	12046204	0.300768	0.0765302
1	NC_044998.1	12056205	0.171318	0.0178639
1	NC_044998.1	12066206	0	6
1	NC_044998.1	12076207	0.241012	0.089076
1	NC_044998.1	12086208	0	2.4
1	NC_044998.1	12096209	3.73941	0.00239412
1	NC_044998.1	12106210	0.115494	0.106107
1	NC_044998.1	12116211	0.965948	0.022992
1	NC_044998.1	12126212	0	1.5
1	NC_044998.1	12136213	0	1.2
1	NC_044998.1	12146214	0.493364	0.00840294
1	NC_044998.1	12156215	0.021596	0.354328
1	NC_044998.1	12166216	1.31362	0.0233346
1	NC_044998.1	12176217	0.776879	0.0102067
1	NC_044998.1	12186218	0	1200
1	NC_044998.1	12196219	0.025254	1.20175
1	NC_044998.1	12206220	2.18152	0.00407032
1	NC_044998.1	12216221	0.034363	0.110881
1	NC_044998.1	12226222	0	0.75
1	NC_044998.1	12236223	0.19622	0.0294576
1	NC_044998.1	12246224	0.151605	0.064907
1	NC_044998.1	12256225	0.887365	0.0114142
1	NC_044998.1	12266226	0.040774	0.0229058
1	NC_044998.1	12276227	0.050443	0.31148
1	NC_044998.1	12286228	0.51627	0.00991251
1	NC_044998.1	12296229	0.775012	0.00440472
1	NC_044998.1	12306230	1.24343	0.00965385
1	NC_044998.1	12316231	4.72578	0.00312448
1	NC_044998.1	12326232	0.202159	0.0783594
1	NC_044998.1	12336233	8.5365	0.00199773
1	NC_044998.1	12346234	1.23975	0.0180646
1	NC_044998.1	12356235	0.925265	0.0703055
1	NC_044998.1	12366236	0.050819	0.117438
1	NC_044998.1	12376237	0.845259	0.0159506
1	NC_044998.1	12386238	0.70906	0.0104253
1	NC_044998.1	12396239	0.066686	0.0301954
1	NC_044998.1	12406240	0.000799	0.172219
1	NC_044998.1	12416241	0.558627	0.0217007
1	NC_044998.1	12426242	0.089921	0.0289662
1	NC_044998.1	12436243	1.33491	0.0137716
1	NC_044998.1	12446244	2.19833	0.00591123
1	NC_044998.1	12456245	0.050501	100.947
1	NC_044998.1	12466246	0.026344	0.0977048
1	NC_044998.1	12476247	0.145329	0.0162049
1	NC_044998.1	12486248	0.072798	0.0308316
1	NC_044998.1	12496249	0.362945	0.0115661
1	NC_044998.1	12506250	0.096563	0.242243
1	NC_044998.1	12516251	4.42843	0.00214063
1	NC_044998.1	12526252	0.694968	0.0898228
1	NC_044998.1	12536253	3.44481	0.00148841
1	NC_044998.1	12546254	2.64923	0.00474225
1	NC_044998.1	12556255	0.001747	0.130691
1	NC_044998.1	12566256	5.02794	0.00225877
1	NC_044998.1	12576257	0	2
1	NC_044998.1	12586258	1.3594	0.00682533
1	NC_044998.1	12596259	0	1200
1	NC_044998.1	12606260	1.14268	0.0181557
1	NC_044998.1	12616261	1.84825	0.00546067
1	NC_044998.1	12626262	6.37968	0.00347985
1	NC_044998.1	12636263	0.000206	0.429414
1	NC_044998.1	12646264	0.313944	0.0517228
1	NC_044998.1	12656265	0.341399	0.272823
1	NC_044998.1	12666266	0	1200
1	NC_044998.1	12676267	0	1.71429
1	NC_044998.1	12686268	0.019918	0.240674
1	NC_044998.1	12696269	0	1.33333
1	NC_044998.1	12706270	0	1.09091
1	NC_044998.1	12716271	0	12
1	NC_044998.1	12726272	0.164363	0.114374
1	NC_044998.1	12736273	0.078031	0.0647103
1	NC_044998.1	12746274	0.233795	0.0928759
1	NC_044998.1	12756275	0.054044	0.0749531
1	NC_044998.1	12766276	0.022818	0.1131
1	NC_044998.1	12776277	0.693689	0.0743551
1	NC_044998.1	12786278	0.210489	0.000367558
1	NC_044998.1	12796279	1.646	0.00921302
1	NC_044998.1	12806280	0.303701	0.0518354
1	NC_044998.1	12816281	0.909046	0.0193176
1	NC_044998.1	12826282	0.909951	0.0318195
1	NC_044998.1	12836283	0.040985	1.03434
1	NC_044998.1	12846284	0.22506	0.0104525
1	NC_044998.1	12856285	0.024483	0.0231484
1	NC_044998.1	12866286	0.111312	0.105179
1	NC_044998.1	12876287	0.034851	0.0676514
1	NC_044998.1	12886288	2.09775	0.00183877
1	NC_044998.1	12896289	0.412043	0.0196076
1	NC_044998.1	12906290	1.18658	0.00642661
1	NC_044998.1	12916291	0.079696	0.0324914
1	NC_044998.1	12926292	0.519028	0.0253868
1	NC_044998.1	12936293	0.182305	0.152871
1	NC_044998.1	12946294	0.286426	0.0514385
1	NC_044998.1	12956295	0.021595	283.471
1	NC_044998.1	12966296	0.467721	0.156571
1	NC_044998.1	12976297	0.297556	0.0646375
1	NC_044998.1	12986298	0.590684	0.0257822
1	NC_044998.1	12996299	0.089479	0.0270573
1	NC_044998.1	13006300	0	1.33333
1	NC_044998.1	13016301	0.146542	0.0124196
1	NC_044998.1	13026302	0.024177	0.606106
1	NC_044998.1	13036303	2e-06	0.237137
1	NC_044998.1	13046304	0.022342	0.160989
1	NC_044998.1	13056305	0.680439	0.022224
1	NC_044998.1	13066306	0.114985	0.0597567
1	NC_044998.1	13076307	0.06423	0.102004
1	NC_044998.1	13086308	3.44272	0.0041689
1	NC_044998.1	13096309	0	3
1	NC_044998.1	13106310	0.157392	0.0416025
1	NC_044998.1	13116311	0.03035	0.0405509
1	NC_044998.1	13126312	0.358618	0.0223433
1	NC_044998.1	13136313	4.04658	0.00183504
1	NC_044998.1	13146314	0.058818	0.109963
1	NC_044998.1	13156315	0.072693	0.0821097
1	NC_044998.1	13166316	0.979347	0.0132204
1	NC_044998.1	13176317	0.850669	0.0157693
1	NC_044998.1	13186318	0.746911	0.00397027
1	NC_044998.1	13196319	0.098851	0.133478
1	NC_044998.1	13206320	0.489709	0.00966651
1	NC_044998.1	13216321	0.013796	172.938
1	NC_044998.1	13226322	1.01718	0.0837266
1	NC_044998.1	13236323	0.491212	0.0354102
1	NC_044998.1	13246324	0.238728	0.20925
1	NC_044998.1	13256325	0.535774	0.00334659
1	NC_044998.1	13266326	0	2.4
1	NC_044998.1	13276327	1.52578	0.0045912
1	NC_044998.1	13286328	0.052976	0.198775
1	NC_044998.1	13296329	0.481203	0.02129
1	NC_044998.1	13306330	0	0.857143
1	NC_044998.1	13316331	0	1200
1	NC_044998.1	13326332	0.022941	0.19201
1	NC_044998.1	13336333	0.352153	0.0487438
1	NC_044998.1	13346334	0.690669	8.51154
1	NC_044998.1	13356335	0	0.545455
1	NC_044998.1	13366336	0.428031	0.0175302
1	NC_044998.1	13376337	0.193869	0.0298426
1	NC_044998.1	13386338	0	1.33333
1	NC_044998.1	13396339	1.20175	0.00907445
1	NC_044998.1	13406340	1.36329	0.00661908
1	NC_044998.1	13416341	0.745277	0.00613679
1	NC_044998.1	13426342	0.092986	0.0280992
1	NC_044998.1	13436343	1.63888	0.0036716
1	NC_044998.1	13446344	0.575507	0.0278374
1	NC_044998.1	13456345	0.692855	0.0120905
1	NC_044998.1	13466346	0.578649	0.0705928
1	NC_044998.1	13476347	0	0.288882
1	NC_044998.1	13486348	0	1200
1	NC_044998.1	13496349	0.280121	0.0715561
1	NC_044998.1	13506350	0	2
1	NC_044998.1	13516351	0	4
1	NC_044998.1	13526352	0.649168	0.0156541
1	NC_044998.1	13536353	0	6
1	NC_044998.1	13546354	0.00033	1.01212
1	NC_044998.1	13556355	0	6
1	NC_044998.1	13566356	0.236779	0.0890065
1	NC_044998.1	13576357	5.63443	0.000864066
1	NC_044998.1	13586358	0	3
1	NC_044998.1	13596359	0.798741	0.0174304
1	NC_044998.1	13606360	1.01328	0.0199813
1	NC_044998.1	13616361	0.671639	0.00426869
1	NC_044998.1	13626362	0	0.8
1	NC_044998.1	13636363	0.538684	0.144102
1	NC_044998.1	13646364	0	3
1	NC_044998.1	13656365	3.62196	0.00218419
1	NC_044998.1	13666366	0.441745	0.00681359
1	NC_044998.1	13676367	0.021919	0.190899
1	NC_044998.1	13686368	0.013796	0.864692
1	NC_044998.1	13696369	1.1759	0.00383522
1	NC_044998.1	13706370	1.13938	0.00788512
1	NC_044998.1	13716371	0.093062	0.0233865
1	NC_044998.1	13726372	0.501704	0.0458239
1	NC_044998.1	13736373	0.364691	3.40908
1	NC_044998.1	13746374	0	2
1	NC_044998.1	13756375	0.013796	0.864692
1	NC_044998.1	13766376	0.110162	0.0690683
1	NC_044998.1	13776377	0	12
1	NC_044998.1	13786378	0.261972	0.0236242
1	NC_044998.1	13796379	1.68943	0.00192575
1	NC_044998.1	13806380	1.97488	0.0155368
1	NC_044998.1	13816381	0.040985	206.868
1	NC_044998.1	13826382	1.44661	0.00298584
1	NC_044998.1	13836383	0	0.6
1	NC_044998.1	13846384	0.405721	0.0470404
1	NC_044998.1	13856385	3.24472	0.0028538
1	NC_044998.1	13866386	0.518441	0.0736874
1	NC_044998.1	13876387	2.0656	0.00379795
1	NC_044998.1	13886388	1.60072	0.0013261
1	NC_044998.1	13896389	0.066638	0.0998816
1	NC_044998.1	13906390	0.093981	0.0724707
1	NC_044998.1	13916391	0.009181	0.0579725
1	NC_044998.1	13926392	0	0.48
1	NC_044998.1	13936393	0.115006	0.0326341
1	NC_044998.1	13946394	0	0.0705882
1	NC_044998.1	13956395	0.525669	0.0825229
1	NC_044998.1	13966396	1.60367	0.0118822
1	NC_044998.1	13976397	0.189417	0.0484941
1	NC_044998.1	13986398	2.94183	0.000433824
1	NC_044998.1	13996399	0.024161	0.173309
1	NC_044998.1	14006400	0.448418	0.121726
1	NC_044998.1	14016401	0.198093	0.0249666
1	NC_044998.1	14026402	0.128951	0.0703709
1	NC_044998.1	14036403	0.834411	0.0729725
1	NC_044998.1	14046404	0.395182	0.0173283
1	NC_044998.1	14056405	0	0.857143
1	NC_044998.1	14066406	0.529721	0.00426294
1	NC_044998.1	14076407	0	1200
1	NC_044998.1	14086408	0.024873	0.237888
1	NC_044998.1	14096409	0.000139	0.200911
1	NC_044998.1	14106410	0.404818	0.0129583
1	NC_044998.1	14116411	0	12
1	NC_044998.1	14126412	0	0.923077
1	NC_044998.1	14136413	0.024142	0.303294
1	NC_044998.1	14146414	0.041287	0.125627
1	NC_044998.1	14156415	0.255912	0.014026
1	NC_044998.1	14166416	0.102236	0.0401432
1	NC_044998.1	14176417	0.435432	0.0094995
1	NC_044998.1	14186418	1.29994	0.00585684
1	NC_044998.1	14196419	0	0.631579
1	NC_044998.1	14206420	6.55538	0.000392401
1	NC_044998.1	14216421	13.4337	0.000221656
1	NC_044998.1	14226422	0.608035	0.000535356
1	NC_044998.1	14236423	0	0.545455
1	NC_044998.1	14246424	0.174063	0.039308
1	NC_044998.1	14256425	2.34571	0.0056099
1	NC_044998.1	14266426	0.032118	0.132874
1	NC_044998.1	14276427	1.10436	0.00204799
1	NC_044998.1	14286428	0.003525	1.78514
1	NC_044998.1	14296429	0.000139	0.133889
1	NC_044998.1	14306430	0	3
1	NC_044998.1	14316431	0.579803	0.0329058
1	NC_044998.1	14326432	0.08284	0.0225923
1	NC_044998.1	14336433	0	1.2
1	NC_044998.1	14346434	0.174194	0.0388654
1	NC_044998.1	14356435	0.206753	1.1324
1	NC_044998.1	14366436	0	6
1	NC_044998.1	14376437	0.35027	0.00325121
1	NC_044998.1	14386438	0.184243	0.0568914
1	NC_044998.1	14396439	3.18184	0.00344322
1	NC_044998.1	14406440	1.30208	0.00210103
1	NC_044998.1	14416441	0.118937	0.157652
1	NC_044998.1	14426442	0.237606	0.0687309
1	NC_044998.1	14436443	1.46735	0.0235281
1	NC_044998.1	14446444	0.702962	0.033039
1	NC_044998.1	14456445	0.024054	0.151809
1	NC_044998.1	14466446	0.001438	0.265102
1	NC_044998.1	14476447	0.089133	0.0757592
1	NC_044998.1	14486448	0	0.857143
1	NC_044998.1	14496449	0.113674	0.176121
1	NC_044998.1	14506450	1.99696	0.00439873
1	NC_044998.1	14516451	0.174799	0.581477
1	NC_044998.1	14526452	0.293837	0.0153711
1	NC_044998.1	14536453	0.549606	0.000707702
1	NC_044998.1	14546454	0.057156	0.159726
1	NC_044998.1	14556455	0.055756	0.122242
1	NC_044998.1	14566456	2.47852	0.00230581
1	NC_044998.1	14576457	0.252688	0.0817418
1	NC_044998.1	14586458	0	0.413793
1	NC_044998.1	14596459	1.26106	0.00263947
1	NC_044998.1	14606460	0.017926	0.0947427
1	NC_044998.1	14616461	0.133489	0.00554875
1	NC_044998.1	14626462	0.475418	0.00644437
1	NC_044998.1	14636463	0.19945	0.0570565
1	NC_044998.1	14646464	0.419109	0.0127989
1	NC_044998.1	14656465	0.616542	0.0196572
1	NC_044998.1	14666466	0.135211	0.0064599
1	NC_044998.1	14676467	0.748336	0.00857253
1	NC_044998.1	14686468	0.497612	0.0522128
1	NC_044998.1	14696469	0.74692	0.0240137
1	NC_044998.1	14706470	2.22242	0.00165051
1	NC_044998.1	14716471	0.047583	0.192977
1	NC_044998.1	14726472	0.025904	0.0377021
1	NC_044998.1	14736473	0	1.5
1	NC_044998.1	14746474	0.01214	0.174904
1	NC_044998.1	14756475	1.11581	0.00594291
1	NC_044998.1	14766476	3.5419	0.00173365
1	NC_044998.1	14776477	0.024177	1.21221
1	NC_044998.1	14786478	0.006435	0.201218
1	NC_044998.1	14796479	0.050501	0.33649
1	NC_044998.1	14806480	1.23231	0.00887942
1	NC_044998.1	14816481	0.381937	0.0195654
1	NC_044998.1	14826482	0.56936	0.0361327
1	NC_044998.1	14836483	0.58744	0.0761531
1	NC_044998.1	14846484	0.730527	0.0171889
1	NC_044998.1	14856485	1.44606	0.00607273
1	NC_044998.1	14866486	0.885147	0.028758
1	NC_044998.1	14876487	0.004681	0.241341
1	NC_044998.1	14886488	0.971645	0.00470288
1	NC_044998.1	14896489	0.124341	0.0610262
1	NC_044998.1	14906490	0.362716	0.035988
1	NC_044998.1	14916491	0.049423	0.0106222
1	NC_044998.1	14926492	0.83879	0.00676858
1	NC_044998.1	14936493	0.435079	0.0132401
1	NC_044998.1	14946494	0.014554	0.584469
1	NC_044998.1	14956495	0.929212	0.00853923
1	NC_044998.1	14966496	0.626006	0.00679707
1	NC_044998.1	14976497	1.03833	0.0134145
1	NC_044998.1	14986498	0.907553	0.0957677
1	NC_044998.1	14996499	0.740246	0.0076559
1	NC_044998.1	15006500	1.18447	0.00281562
1	NC_044998.1	15016501	0.348724	0.0280207
1	NC_044998.1	15026502	0.237896	0.0326931
1	NC_044998.1	15036503	0.008223	0.114988
1	NC_044998.1	15046504	1.78453	0.00841268
1	NC_044998.1	15056505	0	1.5
1	NC_044998.1	15066506	0.372338	0.0998241
1	NC_044998.1	15076507	0	3
1	NC_044998.1	15086508	0.416813	0.0230716
1	NC_044998.1	15096509	0.137855	0.0173438
1	NC_044998.1	15106510	0.843543	15.4614
1	NC_044998.1	15116511	3.05516	0.00227919
1	NC_044998.1	15126512	0	12
1	NC_044998.1	15136513	1.65461	0.00633108
1	NC_044998.1	15146514	0.150705	0.0686069
1	NC_044998.1	15156515	0.117483	0.240153
1	NC_044998.1	15166516	0.502625	0.00614383
1	NC_044998.1	15176517	0.366777	0.02741
1	NC_044998.1	15186518	0.024392	0.483256
1	NC_044998.1	15196519	0.046265	0.0542141
1	NC_044998.1	15206520	0.896396	0.036203
1	NC_044998.1	15216521	0.027395	0.0615494
1	NC_044998.1	15226522	0.482499	0.0262737
1	NC_044998.1	15236523	0.024253	0.242132
1	NC_044998.1	15246524	0.379291	0.00609016
1	NC_044998.1	15256525	4.65223	0.00211953
1	NC_044998.1	15266526	0	0.5
1	NC_044998.1	15276527	0.014146	0.316089
1	NC_044998.1	15286528	0.092264	0.053614
1	NC_044998.1	15296529	1.52145	0.0221772
1	NC_044998.1	15306530	0	0.857143
1	NC_044998.1	15316531	0.092296	156.157
1	NC_044998.1	15326532	0.370917	0.013995
1	NC_044998.1	15336533	0	0.461539
1	NC_044998.1	15346534	0.225157	0.0105766
1	NC_044998.1	15356535	0.092451	0.780018
1	NC_044998.1	15366536	0.00204	1.3865
1	NC_044998.1	15376537	0.747984	0.361712
1	NC_044998.1	15386538	0.213644	0.0255723
1	NC_044998.1	15396539	5.64409	0.00130885
1	NC_044998.1	15406540	0.023856	0.812144
1	NC_044998.1	15416541	2.56564	0.00833743
1	NC_044998.1	15426542	0.43446	0.0119353
1	NC_044998.1	15436543	0.022818	1.92271
1	NC_044998.1	15446544	2.07605	0.00623964
1	NC_044998.1	15456545	0.718731	0.0165353
1	NC_044998.1	15466546	2.76685	0.001929
1	NC_044998.1	15476547	1.98127	0.0127059
1	NC_044998.1	15486548	0.144919	0.0738748
1	NC_044998.1	15496549	0.507057	0.0222914
1	NC_044998.1	15506550	0.148131	0.155183
1	NC_044998.1	15516551	7.08985	0.00187106
1	NC_044998.1	15526552	0	4
1	NC_044998.1	15536553	0.16471	0.401196
1	NC_044998.1	15546554	0.084608	0.0365655
1	NC_044998.1	15556555	0.000272	1.23791
1	NC_044998.1	15566556	2.82131	0.00452957
1	NC_044998.1	15576557	0.125061	0.216599
1	NC_044998.1	15586558	0.50206	0.245268
1	NC_044998.1	15596559	0.041965	0.321803
1	NC_044998.1	15606560	0.022818	1.92269
1	NC_044998.1	15616561	0.033955	0.0502727
1	NC_044998.1	15626562	0.13829	0.0854503
1	NC_044998.1	15636563	0	6
1	NC_044998.1	15646564	0.559432	0.0225522
1	NC_044998.1	15656565	1.39018	0.00212635
1	NC_044998.1	15666566	0.04372	0.059456
1	NC_044998.1	15676567	0.866908	0.0277598
1	NC_044998.1	15686568	0	1
1	NC_044998.1	15696569	0.263682	0.0353226
1	NC_044998.1	15706570	0.543505	0.00375383
1	NC_044998.1	15716571	0.174556	0.0224311
1	NC_044998.1	15726572	0.021595	2.83471
1	NC_044998.1	15736573	0.169851	0.109681
1	NC_044998.1	15746574	0.22989	0.00461352
1	NC_044998.1	15756575	0.00289	0.258709
1	NC_044998.1	15766576	0	12
1	NC_044998.1	15776577	2.55075	0.0078905
1	NC_044998.1	15786578	0.895526	0.0179859
1	NC_044998.1	15796579	2.51428	0.00439892
1	NC_044998.1	15806580	0.083504	0.0472642
1	NC_044998.1	15816581	0.516318	0.0301311
1	NC_044998.1	15826582	0.088593	0.212721
1	NC_044998.1	15836583	0.613858	0.0119612
1	NC_044998.1	15846584	0.021385	0.167312
1	NC_044998.1	15856585	0	12
1	NC_044998.1	15866586	1.13692	0.00774662
1	NC_044998.1	15876587	0	12
1	NC_044998.1	15886588	0.002033	0.198321
1	NC_044998.1	15896589	0.085294	0.121944
1	NC_044998.1	15906590	0.593632	0.0369368
1	NC_044998.1	15916591	0.386141	0.0179597
1	NC_044998.1	15926592	0.031919	0.182385
1	NC_044998.1	15936593	0.281658	0.0134355
1	NC_044998.1	15946594	0.908396	0.00725873
1	NC_044998.1	15956595	0.772837	0.0146303
1	NC_044998.1	15966596	0	1.71429
1	NC_044998.1	15976597	0.62038	0.0166815
1	NC_044998.1	15986598	0.752215	0.00338073
1	NC_044998.1	15996599	0.485377	0.0365718
1	NC_044998.1	16006600	0.274481	0.0431363
1	NC_044998.1	16016601	0.422131	0.0757968
1	NC_044998.1	16026602	0.467963	0.680662
1	NC_044998.1	16036603	0.021595	283.471
1	NC_044998.1	16046604	0.013796	1.72938
1	NC_044998.1	16056605	1.75701	0.00274243
1	NC_044998.1	16066606	2.95774	0.00194657
1	NC_044998.1	16076607	0.240008	0.0220718
1	NC_044998.1	16086608	0	12
1	NC_044998.1	16096609	0.421664	1.52737
1	NC_044998.1	16106610	0	3
1	NC_044998.1	16116611	0.17876	0.0312195
1	NC_044998.1	16126612	0.958783	0.0123515
1	NC_044998.1	16136613	0.024177	242.443
1	NC_044998.1	16146614	0.133146	0.0258078
1	NC_044998.1	16156615	0.02156	0.257867
1	NC_044998.1	16166616	0.896572	0.0230382
1	NC_044998.1	16176617	1.09402	0.0112774
1	NC_044998.1	16186618	0	1.71429
1	NC_044998.1	16196619	0.022818	0.640902
1	NC_044998.1	16206620	0.164362	0.0203159
1	NC_044998.1	16216621	0.056415	0.0789351
1	NC_044998.1	16226622	0	4
1	NC_044998.1	16236623	2.25121	0.00574634
1	NC_044998.1	16246624	0	0.545455
1	NC_044998.1	16256625	0.153975	0.0956528
1	NC_044998.1	16266626	1.3374	0.00699739
1	NC_044998.1	16276627	0	6
1	NC_044998.1	16286628	0.02659	0.0484925
1	NC_044998.1	16296629	1.86461	0.00377765
1	NC_044998.1	16306630	0.024823	0.194004
1	NC_044998.1	16316631	0.004845	0.0718116
1	NC_044998.1	16326632	0.094384	0.0482312
1	NC_044998.1	16336633	0.111005	0.00222396
1	NC_044998.1	16346634	5.02898	0.000218308
1	NC_044998.1	16366636	0.000732	0.00320807
1	NC_044998.1	16376637	1.74884	0.0379749
1	NC_044998.1	16386638	0	3
1	NC_044998.1	16396639	0.098951	0.00769314
1	NC_044998.1	16406640	0	12
1	NC_044998.1	16416641	0.092296	0.22308
1	NC_044998.1	16426642	0.142346	0.0367967
1	NC_044998.1	16436643	0	0.8
1	NC_044998.1	16446644	0	1.09091
1	NC_044998.1	16456645	0.503673	0.0209067
1	NC_044998.1	16466646	3.41049	0.00131586
1	NC_044998.1	16476647	0	0.235294
1	NC_044998.1	16486648	0.024583	0.1506
1	NC_044998.1	16496649	3.41997	0.00248901
1	NC_044998.1	16506650	2.04161	0.00205773
1	NC_044998.1	16516651	0.516099	0.0708623
1	NC_044998.1	16526652	0.022818	1.92271
1	NC_044998.1	16536653	0.216694	0.0355338
1	NC_044998.1	16546654	0.022818	0.320449
1	NC_044998.1	16556655	0	12
1	NC_044998.1	16566656	0.021595	0.566943
1	NC_044998.1	16576657	0.014208	0.19823
1	NC_044998.1	16586658	0.034819	0.057007
1	NC_044998.1	16596659	0.325832	0.0534676
1	NC_044998.1	16606660	1.56458	0.0133423
1	NC_044998.1	16616661	1.08583	0.0082921
1	NC_044998.1	16626662	0.042469	0.0815527
1	NC_044998.1	16636663	0	12
1	NC_044998.1	16646664	0.073289	0.00483288
1	NC_044998.1	16656665	1.39907	0.00570757
1	NC_044998.1	16666666	2.71645	0.00543984
1	NC_044998.1	16676667	0.153343	0.101824
1	NC_044998.1	16686668	0.439785	0.0139278
1	NC_044998.1	16696669	0.076346	0.415899
1	NC_044998.1	16706670	0.002535	0.156926
1	NC_044998.1	16716671	0.126471	0.389275
1	NC_044998.1	16726672	0.147136	0.196246
1	NC_044998.1	16736673	0.209021	0.0315597
1	NC_044998.1	16746674	0.666309	0.0119025
1	NC_044998.1	16756675	0.037134	0.202019
1	NC_044998.1	16766676	0.099303	0.0399597
1	NC_044998.1	16776677	0.016614	0.25658
1	NC_044998.1	16786678	1.5708	0.00557662
1	NC_044998.1	16796679	0.051491	0.0286579
1	NC_044998.1	16806680	0.024178	0.808131
1	NC_044998.1	16816681	0.013796	0.864692
1	NC_044998.1	16826682	0.515974	0.0237107
1	NC_044998.1	16836683	0	0.631579
1	NC_044998.1	16846684	2.45474	0.0116042
1	NC_044998.1	16856685	0.015728	0.287682
1	NC_044998.1	16866686	0.536398	0.0187945
1	NC_044998.1	16876687	0.0267	0.27801
1	NC_044998.1	16886688	0.074705	0.343087
1	NC_044998.1	16896689	0	1200
1	NC_044998.1	16906690	0.184972	0.36765
1	NC_044998.1	16916691	0.808072	0.016633
1	NC_044998.1	16926692	0	0.75
1	NC_044998.1	16936693	0.133577	0.0360294
1	NC_044998.1	16946694	0	4
1	NC_044998.1	16956695	0.016642	0.0940035
1	NC_044998.1	16966696	0	1.5
1	NC_044998.1	16976697	0.099397	0.0287846
1	NC_044998.1	16986698	0.018389	0.233562
1	NC_044998.1	16996699	0	12
1	NC_044998.1	17006700	0.419625	0.007882
1	NC_044998.1	17016701	0.808332	0.00359371
1	NC_044998.1	17026702	0.218017	0.124503
1	NC_044998.1	17036703	0	0.387106
1	NC_044998.1	17046704	0.281803	0.0155865
1	NC_044998.1	17056705	0.652296	0.0310943
1	NC_044998.1	17066706	3.32492	0.00320037
1	NC_044998.1	17076707	0.584443	0.0117315
1	NC_044998.1	17086708	0.078393	0.277371
1	NC_044998.1	17096709	0.662795	0.0274
1	NC_044998.1	17106710	2.35547	0.00271918
1	NC_044998.1	17116711	0.478001	0.0343736
1	NC_044998.1	17126712	0.084041	0.823457
1	NC_044998.1	17136713	0.042143	0.146612
1	NC_044998.1	17146714	0.670695	0.0381906
1	NC_044998.1	17156715	1.52183	0.00416068
1	NC_044998.1	17166716	0.769971	0.300528
1	NC_044998.1	17176717	3.56553	0.004198
1	NC_044998.1	17186718	0.355809	0.0344894
1	NC_044998.1	17196719	0.742659	0.032985
1	NC_044998.1	17206720	0.279439	0.0700727
1	NC_044998.1	17216721	0.080249	0.0545961
1	NC_044998.1	17226722	3.07497	0.00163181
1	NC_044998.1	17236723	2.18142	0.00292801
1	NC_044998.1	17246724	0.26995	0.219079
1	NC_044998.1	17256725	0.785464	0.0143369
1	NC_044998.1	17266726	1.60775	0.00757946
1	NC_044998.1	17276727	0.530419	0.033223
1	NC_044998.1	17286728	0.614608	0.152671
1	NC_044998.1	17296729	0.925785	0.00404238
1	NC_044998.1	17306730	0.512332	0.0652678
1	NC_044998.1	17316731	0.247555	0.00469711
1	NC_044998.1	17326732	0.024177	2.42443
1	NC_044998.1	17336733	2.06011	0.00711425
1	NC_044998.1	17346734	0.056785	0.193391
1	NC_044998.1	17356735	0.237054	0.0466368
1	NC_044998.1	17366736	0.219203	0.0610638
1	NC_044998.1	17376737	0.43759	0.159964
1	NC_044998.1	17386738	1.38067	0.00298919
1	NC_044998.1	17396739	1.49675	0.0129905
1	NC_044998.1	17406740	0.010494	0.0107414
1	NC_044998.1	17416741	0.003837	0.00222611
1	NC_044998.1	17426742	0	0.0454546
1	NC_044998.1	17436743	0.028383	0.0010187
1	NC_044998.1	17446744	0.047865	0.198844
1	NC_044998.1	17456745	0.337583	0.0100913
1	NC_044998.1	17466746	0.825059	0.00429288
1	NC_044998.1	17476747	0.235448	0.0247938
1	NC_044998.1	17486748	0.050529	0.504585
1	NC_044998.1	17496749	0.440752	1.99742
1	NC_044998.1	17506750	0.270409	0.0863516
1	NC_044998.1	17516751	0.770159	0.300288
1	NC_044998.1	17526752	1.43571	0.000691248
1	NC_044998.1	17536753	0.186675	0.0971665
1	NC_044998.1	17546754	0.535817	0.0653122
1	NC_044998.1	17556755	0.022818	0.961353
1	NC_044998.1	17566756	0	0.705882
1	NC_044998.1	17576757	0	4
1	NC_044998.1	17586758	0.130327	0.313883
1	NC_044998.1	17596759	0.021595	2.83471
1	NC_044998.1	17606760	0.137432	0.133227
1	NC_044998.1	17616761	1.05796	0.00888682
1	NC_044998.1	17626762	0.044514	0.225226
1	NC_044998.1	17636763	0	0.181818
1	NC_044998.1	17646764	0	6
1	NC_044998.1	17656765	0.097359	0.0238463
1	NC_044998.1	17666766	1.03549	0.00603901
1	NC_044998.1	17676767	1.41431	0.00970842
1	NC_044998.1	17686768	5.52742	0.00153746
1	NC_044998.1	17696769	0.022818	0.640898
1	NC_044998.1	17706770	0	1.5
1	NC_044998.1	17716771	3.99188	0.00407352
1	NC_044998.1	17726772	0.382036	0.02556
1	NC_044998.1	17736773	0.144213	0.130119
1	NC_044998.1	17746774	0.751294	0.11747
1	NC_044998.1	17756775	0.848845	0.00364832
1	NC_044998.1	17766776	1.30273	0.0368744
1	NC_044998.1	17776777	0.081328	0.342316
1	NC_044998.1	17786778	0.022574	0.240986
1	NC_044998.1	17796779	0.050352	0.0552278
1	NC_044998.1	17806780	0.141747	0.0888226
1	NC_044998.1	17816781	0.264226	0.0381098
1	NC_044998.1	17826782	0.693066	0.00611292
1	NC_044998.1	17836783	0.178325	0.123465
1	NC_044998.1	17846784	6.11456	0.00183586
1	NC_044998.1	17856785	1.55529	0.00971976
1	NC_044998.1	17866786	0	1.71429
1	NC_044998.1	17876787	0.295054	0.0890539
1	NC_044998.1	17886788	0.723349	0.0327506
1	NC_044998.1	17896789	0.358219	0.0845533
1	NC_044998.1	17906790	2.00759	0.00779726
1	NC_044998.1	17916791	0.849104	0.0135118
1	NC_044998.1	17926792	0.653721	0.168561
1	NC_044998.1	17936793	0.759384	0.177659
1	NC_044998.1	17946794	1.35524	0.0115964
1	NC_044998.1	17956795	0.078354	0.0822958
1	NC_044998.1	17966796	0.871331	0.02017
1	NC_044998.1	17976797	1.68345	0.0037062
1	NC_044998.1	17986798	0.109346	0.0865864
1	NC_044998.1	17996799	1.16997	0.0078231
1	NC_044998.1	18006800	0	1.2
1	NC_044998.1	18016801	0.433155	0.370239
1	NC_044998.1	18026802	0.293692	0.0199841
1	NC_044998.1	18036803	0.052375	0.0538014
1	NC_044998.1	18046804	0	12
1	NC_044998.1	18056805	0.028182	0.216057
1	NC_044998.1	18066806	4.0673	0.000648855
1	NC_044998.1	18076807	3.97776	0.00436707
1	NC_044998.1	18086808	0	0.8
1	NC_044998.1	18096809	0.139258	0.313176
1	NC_044998.1	18106810	0.204604	0.0927079
1	NC_044998.1	18116811	0	0.363636
1	NC_044998.1	18126812	0.295657	0.0143769
1	NC_044998.1	18136813	0.29241	0.0188534
1	NC_044998.1	18146814	0.083793	0.0801633
1	NC_044998.1	18156815	0.908477	0.00360336
1	NC_044998.1	18166816	0.991235	0.0138151
1	NC_044998.1	18176817	0	1.2
1	NC_044998.1	18186818	0.146939	0.0553797
1	NC_044998.1	18196819	0.106018	0.103302
1	NC_044998.1	18206820	1.06352	0.0102903
1	NC_044998.1	18216821	0.037677	0.0291365
1	NC_044998.1	18226822	2.37056	0.00513681
1	NC_044998.1	18236823	0.100612	0.0700172
1	NC_044998.1	18246824	0.119647	0.00931131
1	NC_044998.1	18256825	0.060064	0.0451753
1	NC_044998.1	18266826	1.13571	0.0037389
1	NC_044998.1	18276827	0.001577	0.210109
1	NC_044998.1	18286828	0.247671	0.163427
1	NC_044998.1	18296829	0.395195	0.0134492
1	NC_044998.1	18306830	0.175491	0.131401
1	NC_044998.1	18316831	0	3
1	NC_044998.1	18326832	0.368272	0.0586964
1	NC_044998.1	18336833	0.402225	0.0676955
1	NC_044998.1	18346834	0.044659	0.0633538
1	NC_044998.1	18356835	0.995573	0.01585
1	NC_044998.1	18366836	0.075858	0.0433314
1	NC_044998.1	18376837	0.749701	0.0209063
1	NC_044998.1	18386838	3.16294	0.00412485
1	NC_044998.1	18396839	0.359449	0.0195259
1	NC_044998.1	18406840	3.43458	0.00230511
1	NC_044998.1	18416841	1.3211	0.00357807
1	NC_044998.1	18426842	0.26354	0.0201302
1	NC_044998.1	18436843	0.528957	0.0114163
1	NC_044998.1	18446844	1.47292	0.0158807
1	NC_044998.1	18456845	4.89347	0.0016639
1	NC_044998.1	18466846	0	0.75
1	NC_044998.1	18476847	1.1997	0.00430895
1	NC_044998.1	18486848	0.10042	0.0463914
1	NC_044998.1	18496849	1.3464	0.0065691
1	NC_044998.1	18506850	0.097011	0.327346
1	NC_044998.1	18516851	0.439922	0.0253917
1	NC_044998.1	18526852	0.641968	0.0107459
1	NC_044998.1	18536853	0.028117	0.0742111
1	NC_044998.1	18546854	0.670965	0.0452348
1	NC_044998.1	18556855	0	0.00530504
1	NC_044998.1	18566856	0.240257	0.00246213
1	NC_044998.1	18576857	0.610474	0.0126909
1	NC_044998.1	18586858	0.015765	0.0723032
1	NC_044998.1	18596859	0.205523	0.294664
1	NC_044998.1	18606860	0	4
1	NC_044998.1	18616861	0.312667	0.0872626
1	NC_044998.1	18626862	0	6
1	NC_044998.1	18636863	0	1200
1	NC_044998.1	18646864	0.028899	0.0738064
1	NC_044998.1	18656865	1.7268	0.00728992
1	NC_044998.1	18666866	0.067628	0.694528
1	NC_044998.1	18676867	2.49756	0.00266497
1	NC_044998.1	18686868	0.975873	0.00998425
1	NC_044998.1	18696869	1.99803	0.00452061
1	NC_044998.1	18706870	0.185993	0.0175899
1	NC_044998.1	18716871	1.0185	0.0114434
1	NC_044998.1	18726872	0.032182	0.14288
1	NC_044998.1	18736873	0	0.571429
1	NC_044998.1	18746874	1.11922	0.0204103
1	NC_044998.1	18756875	1.49174	0.00161819
1	NC_044998.1	18766876	0.429489	0.51352
1	NC_044998.1	18776877	0.026047	0.0365784
1	NC_044998.1	18786878	0.659671	0.00688723
1	NC_044998.1	18796879	0.092296	0.520523
1	NC_044998.1	18806880	2.66905	0.000825132
1	NC_044998.1	18816881	3.16537	0.00175593
1	NC_044998.1	18826882	4.8607	0.000610595
1	NC_044998.1	18836883	0.009004	0.221497
1	NC_044998.1	18846884	0.922197	0.0265683
1	NC_044998.1	18856885	0.26948	0.00518341
1	NC_044998.1	18866886	0	0.0416667
1	NC_044998.1	18876887	0.214096	0.0501125
1	NC_044998.1	18886888	0	12
1	NC_044998.1	18896889	2.89558	0.00536761
1	NC_044998.1	18906890	5.55893	0.00131309
1	NC_044998.1	18916891	3.34451	0.00302478
1	NC_044998.1	18926892	0.314817	0.0953287
1	NC_044998.1	18936893	1.53207	0.0133332
1	NC_044998.1	18946894	9.34436	0.000692997
1	NC_044998.1	18956895	0.11161	0.249181
1	NC_044998.1	18966896	1.84804	0.00507501
1	NC_044998.1	18976897	9.95056	0.000254214
1	NC_044998.1	18986898	0.671275	0.00465862
1	NC_044998.1	18996899	3.76482	0.000745846
1	NC_044998.1	19006900	0.092296	1.56157
1	NC_044998.1	19016901	3.40584	0.00127418
1	NC_044998.1	19026902	0.104849	0.100458
1	NC_044998.1	19036903	7.43777	0.000370393
1	NC_044998.1	19046904	0	0.0574163
1	NC_044998.1	19056905	0.010489	0.0484924
1	NC_044998.1	19066906	0.09096	0.0006337
1	NC_044998.1	19076907	0.071548	0.0957864
1	NC_044998.1	19086908	0	1200
1	NC_044998.1	19096909	21.1557	0.000168875
1	NC_044998.1	19106910	45.835	5.18772e-05
1	NC_044998.1	19116911	18.8589	5.39393e-05
1	NC_044998.1	19126912	21.7126	5.56729e-05
1	NC_044998.1	19136913	64.5596	2.84369e-05
1	NC_044998.1	19146914	82.3622	2.28085e-05
1	NC_044998.1	19156915	89.8248	2.24631e-05
1	NC_044998.1	19166916	122.243	2.27953e-05
1	NC_044998.1	19176917	46.1489	2.62537e-05
1	NC_044998.1	19186918	5.44665	0.000266415
1	NC_044998.1	19196919	2.83578	0.000362402
1	NC_044998.1	19206920	8.06136	0.000191174
1	NC_044998.1	19216921	43.8573	6.4824e-05
1	NC_044998.1	19226922	0.032314	0.104286
1	NC_044998.1	19236923	1.59704	0.00419901
1	NC_044998.1	19246924	0.084839	0.219578
1	NC_044998.1	19256925	0.050033	0.00102456
1	NC_044998.1	19266926	0.000619	0.00353117
1	NC_044998.1	19276927	0.019467	0.00154498
1	NC_044998.1	19286928	0.245761	0.000224641
1	NC_044998.1	19306930	18.8017	8.64999e-05
1	NC_044998.1	19316931	33.3331	8.72051e-05
1	NC_044998.1	19326932	0.022269	0.00372693
1	NC_044998.1	19336933	0.818532	0.00217321
1	NC_044998.1	19346934	0.123585	0.000193751
1	NC_044998.1	19356935	11.8775	2.24304e-05
1	NC_044998.1	19366936	0	0.0325203
1	NC_044998.1	19376937	0.002729	0.00318013
1	NC_044998.1	19386938	0.714056	0.0171954
1	NC_044998.1	19396939	36.9704	4.14591e-05
1	NC_044998.1	19406940	6.52921	0.00129268
1	NC_044998.1	19416941	47.621	5.48858e-05
1	NC_044998.1	19426942	1.17603	0.000329414
1	NC_044998.1	19436943	44.7024	1.49581e-05
1	NC_044998.1	19446944	201.656	1.01649e-05
1	NC_044998.1	19456945	197.375	6.70651e-06
1	NC_044998.1	19466946	204.255	5.81422e-06
1	NC_044998.1	19476947	215.643	5.32474e-06
1	NC_044998.1	19486948	227.64	4.95897e-06
1	NC_044998.1	19496949	231.444	4.31642e-06
1	NC_044998.1	19506950	421.056	3.72751e-06
1	NC_044998.1	19516951	445.815	3.54538e-06
1	NC_044998.1	19526952	409.454	3.56076e-06
1	NC_044998.1	19536953	325.758	3.63785e-06
1	NC_044998.1	19546954	230.531	3.75824e-06
1	NC_044998.1	19556955	318.489	3.79624e-06
1	NC_044998.1	19566956	257.453	4.08395e-06
1	NC_044998.1	19576957	139.835	5.77606e-06
1	NC_044998.1	19586958	0	12
1	NC_044998.1	19596959	9.01294	0.000345055
1	NC_044998.1	19606960	84.459	3.9699e-06
1	NC_044998.1	19616961	323.657	3.56717e-06
1	NC_044998.1	19626962	474.197	3.41049e-06
1	NC_044998.1	19636963	478.193	3.35202e-06
1	NC_044998.1	19646964	653.427	3.28369e-06
1	NC_044998.1	19656965	618.039	3.35626e-06
1	NC_044998.1	19666966	608.627	3.48922e-06
1	NC_044998.1	19676967	512.422	3.67865e-06
1	NC_044998.1	19686968	414.28	3.95587e-06
1	NC_044998.1	19696969	301.103	4.31132e-06
1	NC_044998.1	19706970	77.3605	4.7631e-06
1	NC_044998.1	19716971	90.0125	5.32796e-06
1	NC_044998.1	19726972	9.69119	2.25055e-05
1	NC_044998.1	19736973	73.5849	2.0325e-05
1	NC_044998.1	19746974	1.2102	0.00934428
1	NC_044998.1	19756975	5.5645	0.000208236
1	NC_044998.1	19766976	3.32983	0.00979501
1	NC_044998.1	19776977	91.4238	5.45645e-06
1	NC_044998.1	19786978	138.558	4.95849e-06
1	NC_044998.1	19796979	19.3916	0.000140167
1	NC_044998.1	19806980	92.1944	4.22998e-06
1	NC_044998.1	19816981	174.319	3.99427e-06
1	NC_044998.1	19826982	258.856	3.8869e-06
1	NC_044998.1	19836983	286.66	3.78632e-06
1	NC_044998.1	19846984	442.893	3.67089e-06
1	NC_044998.1	19856985	324.524	3.79469e-06
1	NC_044998.1	19866986	74.4899	3.95903e-06
1	NC_044998.1	19876987	0.01126	0.00855265
1	NC_044998.1	19886988	256.424	3.91294e-06
1	NC_044998.1	19896989	161.728	4.03068e-06
1	NC_044998.1	19906990	185.576	4.03389e-06
1	NC_044998.1	19916991	255.005	3.92909e-06
1	NC_044998.1	19926992	463.521	3.86516e-06
1	NC_044998.1	19936993	209.601	4.53468e-06
1	NC_044998.1	19946994	111.695	6.47724e-06
1	NC_044998.1	19956995	145.094	8.18647e-06
1	NC_044998.1	19966996	43.3106	1.24308e-05
1	NC_044998.1	19976997	63.6058	1.43716e-05
1	NC_044998.1	19986998	46.6662	2.16307e-05
1	NC_044998.1	19996999	1.43143	0.00564702
1	NC_044998.1	20007000	6.6068	0.000391953
1	NC_044998.1	20017001	1.02486	0.029584
1	NC_044998.1	20027002	44.708	3.96475e-05
[truncated: 99,340 more rows]

## Sheet: WBMWinSwp
Chr	RefSeq	midPos	Alpha	CLR
1	NC_044998.1	15001	6.04037	0.000203899
1	NC_044998.1	25002	0	0.333333
1	NC_044998.1	35003	2.30926	0.00463892
1	NC_044998.1	45004	3.43843	0.00505336
1	NC_044998.1	55005	1.08637	0.0966357
1	NC_044998.1	65006	3.25002	0.000829879
1	NC_044998.1	75007	1.08116	0.00803954
1	NC_044998.1	85008	0.186722	0.0815861
1	NC_044998.1	95009	2.2368	0.00325645
1	NC_044998.1	105010	0.089978	0.284644
1	NC_044998.1	115011	0.279258	0.019513
1	NC_044998.1	125012	0	2
1	NC_044998.1	135013	1.68301	0.00210532
1	NC_044998.1	145014	4.22548	0.00256518
1	NC_044998.1	155015	1.53375	0.015801
1	NC_044998.1	165016	0.235724	0.0636059
1	NC_044998.1	175017	0	12
1	NC_044998.1	185018	0.067569	0.152501
1	NC_044998.1	195019	0.920469	0.00164632
1	NC_044998.1	205020	0.979187	0.0039884
1	NC_044998.1	215021	0.03868	0.159211
1	NC_044998.1	225022	0	2.4
1	NC_044998.1	235023	4.61857	0.00630004
1	NC_044998.1	245024	2.26656	0.00314727
1	NC_044998.1	255025	0.012002	0.107985
1	NC_044998.1	265026	0.190902	0.0566503
1	NC_044998.1	275027	0.187596	0.109098
1	NC_044998.1	285028	0.315532	0.00716308
1	NC_044998.1	295029	0.354432	0.0485665
1	NC_044998.1	305030	2.56689	0.00293925
1	NC_044998.1	315031	3.12606	0.00501624
1	NC_044998.1	325032	0.416921	0.0152229
1	NC_044998.1	335033	0.500733	0.0384976
1	NC_044998.1	345034	0.012247	297.711
1	NC_044998.1	355035	0.834238	0.0706198
1	NC_044998.1	365036	0.717708	0.0322153
1	NC_044998.1	375037	0	0.48
1	NC_044998.1	385038	0.424637	0.00426093
1	NC_044998.1	395039	0.804829	0.0125578
1	NC_044998.1	405040	0.206127	0.00894907
1	NC_044998.1	415041	0.098774	0.0924752
1	NC_044998.1	425042	5.06569	0.00379475
1	NC_044998.1	435043	0.35948	0.061512
1	NC_044998.1	445044	2.59905	0.00800753
1	NC_044998.1	455045	0.240255	0.00738287
1	NC_044998.1	465046	0.014557	0.313897
1	NC_044998.1	475047	0.058027	0.180798
1	NC_044998.1	485048	0.023929	0.0024223
1	NC_044998.1	495049	1.42644	0.00761798
1	NC_044998.1	505050	1.02546	0.0184355
1	NC_044998.1	515051	0	0.00754717
1	NC_044998.1	525052	0.961759	0.00335361
1	NC_044998.1	535053	0.464541	0.00559531
1	NC_044998.1	545054	0.962812	0.00619112
1	NC_044998.1	555055	0.401145	0.0536217
1	NC_044998.1	565056	0.376931	0.0349569
1	NC_044998.1	575057	0	1
1	NC_044998.1	585058	0.025473	0.586819
1	NC_044998.1	595059	0.012247	1.48856
1	NC_044998.1	605060	0.719017	0.0410562
1	NC_044998.1	615061	5.96054	0.00141849
1	NC_044998.1	625062	1.27671	0.00546316
1	NC_044998.1	635063	0	0.857143
1	NC_044998.1	645064	0.421449	0.0265318
1	NC_044998.1	655065	0.553972	0.00860499
1	NC_044998.1	665066	0.012247	0.15669
1	NC_044998.1	675067	0.024992	0.179083
1	NC_044998.1	685068	0	12
1	NC_044998.1	695069	1.55445	0.00266198
1	NC_044998.1	705070	0.252452	0.0210392
1	NC_044998.1	715071	0.467899	0.38909
1	NC_044998.1	725072	0.377609	0.12721
1	NC_044998.1	735073	0.131298	0.0897205
1	NC_044998.1	745074	0	6
1	NC_044998.1	755075	0.175152	0.0412755
1	NC_044998.1	765076	1.16543	0.0231241
1	NC_044998.1	775077	0.792203	0.0103264
1	NC_044998.1	785078	0.147113	0.0294109
1	NC_044998.1	795079	0.398985	0.0115396
1	NC_044998.1	805080	0.78005	0.0266845
1	NC_044998.1	815081	0.314607	0.0165955
1	NC_044998.1	825082	0.058754	1.26233
1	NC_044998.1	835083	1.24639	0.0144471
1	NC_044998.1	845084	0.027394	0.103176
1	NC_044998.1	855085	0.083388	0.531509
1	NC_044998.1	865086	3.37471	0.00707324
1	NC_044998.1	875087	0	12
1	NC_044998.1	885088	0.012303	0.743146
1	NC_044998.1	895089	0.167448	0.125586
1	NC_044998.1	905090	0.146189	0.0329113
1	NC_044998.1	915091	0.12274	0.278958
1	NC_044998.1	925092	0	12
1	NC_044998.1	935093	0.016401	0.286206
1	NC_044998.1	945094	1.73344	0.0022683
1	NC_044998.1	955095	1.13714	0.0156869
1	NC_044998.1	965096	0.521212	0.00896727
1	NC_044998.1	975097	0	0.25
1	NC_044998.1	985098	0.77778	0.00946982
1	NC_044998.1	995099	0.663189	0.0106308
1	NC_044998.1	1005100	1.66722	0.00290394
1	NC_044998.1	1015101	0.01006	0.441808
1	NC_044998.1	1025102	1.24451	0.024312
1	NC_044998.1	1035103	0.294285	0.00685984
1	NC_044998.1	1045104	1.42036	0.00417829
1	NC_044998.1	1055105	0.890091	0.0163305
1	NC_044998.1	1065106	0.007667	0.0320189
1	NC_044998.1	1075107	0	1
1	NC_044998.1	1085108	0.414363	0.0474732
1	NC_044998.1	1095109	0.015209	0.0116685
1	NC_044998.1	1105110	0.902591	0.0264934
1	NC_044998.1	1115111	0.353757	0.0404476
1	NC_044998.1	1125112	0.590347	0.0120559
1	NC_044998.1	1135113	0.644412	0.0288072
1	NC_044998.1	1145114	0.012309	0.430082
1	NC_044998.1	1155115	0	1200
1	NC_044998.1	1165116	0.046688	0.0808343
1	NC_044998.1	1175117	0.376403	0.00683724
1	NC_044998.1	1185118	1.02168	0.0109159
1	NC_044998.1	1195119	0.700283	0.0268139
1	NC_044998.1	1205120	0.014109	0.0142286
1	NC_044998.1	1215121	0.252323	0.0378153
1	NC_044998.1	1225122	0.002199	0.313641
1	NC_044998.1	1235123	0.405569	0.0318498
1	NC_044998.1	1245124	0.004044	0.152469
1	NC_044998.1	1255125	0.092434	0.1469
1	NC_044998.1	1265126	0.080972	1.60875
1	NC_044998.1	1275127	0.495267	0.140495
1	NC_044998.1	1285128	1.26345	0.0111893
1	NC_044998.1	1295129	0	1200
1	NC_044998.1	1305130	0.011378	0.174913
1	NC_044998.1	1315131	0.083947	0.265221
1	NC_044998.1	1325132	0.286797	0.249115
1	NC_044998.1	1335133	0	0.139535
1	NC_044998.1	1345134	1.276	0.0387217
1	NC_044998.1	1355135	0.728263	0.0143915
1	NC_044998.1	1365136	0.010841	0.264842
1	NC_044998.1	1375137	0	2.4
1	NC_044998.1	1385138	0	3
1	NC_044998.1	1395139	0.054741	0.327006
1	NC_044998.1	1405140	0.594826	0.00741096
1	NC_044998.1	1415141	0.011857	0.866795
1	NC_044998.1	1425142	0.139403	0.0251737
1	NC_044998.1	1435143	0.057176	0.115553
1	NC_044998.1	1445144	0.793469	0.0245139
1	NC_044998.1	1455145	0.286195	0.998187
1	NC_044998.1	1465146	1.72181	0.00577211
1	NC_044998.1	1475147	0.172037	0.0385115
1	NC_044998.1	1485148	0.564822	0.0606888
1	NC_044998.1	1495149	0.012247	297.711
1	NC_044998.1	1505150	0.880903	0.277843
1	NC_044998.1	1515151	1.21592	0.00479735
1	NC_044998.1	1525152	3.8e-05	0.0265378
1	NC_044998.1	1535153	1.4023	0.00960537
1	NC_044998.1	1545154	0.011858	0.371468
1	NC_044998.1	1555155	0.20293	0.0351205
1	NC_044998.1	1565156	2.48972	0.00711058
1	NC_044998.1	1575157	0.631574	0.120737
1	NC_044998.1	1585158	1.24848	0.00520231
1	NC_044998.1	1595159	0.434139	0.0247929
1	NC_044998.1	1605160	0	1.5
1	NC_044998.1	1615161	0.017948	0.205613
1	NC_044998.1	1625162	0.790061	0.0363825
1	NC_044998.1	1635163	0.170628	0.0725426
1	NC_044998.1	1645164	0	0.521739
1	NC_044998.1	1655165	0.133665	0.0583246
1	NC_044998.1	1665166	0.006358	0.300275
1	NC_044998.1	1675167	0.259701	0.0110435
1	NC_044998.1	1685168	0.705559	0.0217257
1	NC_044998.1	1695169	0.665268	0.0853669
1	NC_044998.1	1705170	2.22863	0.00147788
1	NC_044998.1	1715171	2.93892	0.00500749
1	NC_044998.1	1725172	2.50927	0.00408614
1	NC_044998.1	1735173	0.018099	0.0417473
1	NC_044998.1	1745174	0	0.545455
1	NC_044998.1	1755175	1.68801	0.00747975
1	NC_044998.1	1765176	0.463976	0.0381172
1	NC_044998.1	1775177	0.160323	0.139486
1	NC_044998.1	1785178	1.08025	0.0793768
1	NC_044998.1	1795179	1.09411	0.00848391
1	NC_044998.1	1805180	0.541158	0.146608
1	NC_044998.1	1815181	0	4
1	NC_044998.1	1825182	0	12
1	NC_044998.1	1835183	0	1200
1	NC_044998.1	1845184	1.69656	0.00545755
1	NC_044998.1	1855185	0.368101	0.0373896
1	NC_044998.1	1865186	1.20874	0.0207257
1	NC_044998.1	1875187	0	0.75
1	NC_044998.1	1885188	0.338822	0.0252596
1	NC_044998.1	1895189	2.40657	0.00560542
1	NC_044998.1	1905190	0.021751	0.0442739
1	NC_044998.1	1915191	0.002825	0.142866
1	NC_044998.1	1925192	1.13792	0.00491119
1	NC_044998.1	1935193	3.03015	0.00331652
1	NC_044998.1	1945194	4.04857	0.00611149
1	NC_044998.1	1955195	0.333876	0.030014
1	NC_044998.1	1965196	1.48605	0.0215613
1	NC_044998.1	1975197	6.14672	0.00069535
1	NC_044998.1	1985198	0.243822	0.0195418
1	NC_044998.1	1995199	0	6
1	NC_044998.1	2005200	1.94155	0.0178498
1	NC_044998.1	2015201	0	6
1	NC_044998.1	2025202	0	0.324324
1	NC_044998.1	2035203	0	12
1	NC_044998.1	2045204	0.899297	0.0263779
1	NC_044998.1	2055205	0.380443	0.035293
1	NC_044998.1	2065206	0.109165	0.00296205
1	NC_044998.1	2075207	0.314317	0.0393245
1	NC_044998.1	2085208	0.050879	0.136233
1	NC_044998.1	2095209	0.621509	0.00558011
1	NC_044998.1	2105210	0.806524	0.0148023
1	NC_044998.1	2115211	0.311473	0.0957788
1	NC_044998.1	2125212	2.29953	0.0360217
1	NC_044998.1	2135213	1.74197	0.00412409
1	NC_044998.1	2145214	2.6e-05	0.183563
1	NC_044998.1	2155215	1.36565	0.00384134
1	NC_044998.1	2165216	1.46118	0.00152395
1	NC_044998.1	2175217	4.55623	0.00448381
1	NC_044998.1	2185218	0.28765	0.163371
1	NC_044998.1	2195219	0.123492	0.439363
1	NC_044998.1	2205220	0.014415	0.358402
1	NC_044998.1	2215221	0.220578	0.0972378
1	NC_044998.1	2225222	1.55479	0.023528
1	NC_044998.1	2235223	2.7229	0.00402124
1	NC_044998.1	2245224	2.30278	0.0198102
1	NC_044998.1	2255225	0.066755	0.0083586
1	NC_044998.1	2265226	0.485378	0.225507
1	NC_044998.1	2275227	0.670138	0.00837214
1	NC_044998.1	2285228	0.328395	0.207811
1	NC_044998.1	2295229	3.09139	0.00553176
1	NC_044998.1	2305230	0.000353	1.19426
1	NC_044998.1	2315231	0.056122	0.0263976
1	NC_044998.1	2325232	0.30848	0.109707
1	NC_044998.1	2335233	0.274002	0.0966041
1	NC_044998.1	2345234	1.91169	0.00127191
1	NC_044998.1	2355235	0	0.545455
1	NC_044998.1	2365236	0.292719	0.0365516
1	NC_044998.1	2375237	0.239274	0.0946263
1	NC_044998.1	2385238	0	1200
1	NC_044998.1	2395239	0	6
1	NC_044998.1	2405240	1.21136	0.0142217
1	NC_044998.1	2415241	0.4427	1.31961
1	NC_044998.1	2425242	1.66182	0.0184484
1	NC_044998.1	2435243	0	1.71429
1	NC_044998.1	2445244	0.602233	0.0172663
1	NC_044998.1	2455245	0.840791	0.16534
1	NC_044998.1	2465246	0.279135	0.141937
1	NC_044998.1	2475247	0.011904	1.29894
1	NC_044998.1	2485248	0.515147	0.163605
1	NC_044998.1	2495249	0.512325	0.00951419
1	NC_044998.1	2505250	0.001799	0.0123214
1	NC_044998.1	2515251	0.183203	0.0252234
1	NC_044998.1	2525252	0.062738	0.549445
1	NC_044998.1	2535253	0.115101	0.0174123
1	NC_044998.1	2545254	0	3
1	NC_044998.1	2555255	0.008498	2.13856
1	NC_044998.1	2565256	0.43973	0.027162
1	NC_044998.1	2575257	0.290572	0.0753958
1	NC_044998.1	2585258	0.537915	0.0471012
1	NC_044998.1	2595259	3.82383	0.00204055
1	NC_044998.1	2605260	2.31581	0.00236465
1	NC_044998.1	2615261	0.821364	0.0104567
1	NC_044998.1	2625262	0.017562	0.184823
1	NC_044998.1	2635263	3.10858	0.010251
1	NC_044998.1	2645264	0	2
1	NC_044998.1	2655265	0.005808	0.0890873
1	NC_044998.1	2665266	1.41667	0.0122022
1	NC_044998.1	2675267	0.727464	0.0354054
1	NC_044998.1	2685268	0.133368	0.0855487
1	NC_044998.1	2695269	0.208988	0.0763188
1	NC_044998.1	2705270	1.62382	0.00242154
1	NC_044998.1	2715271	0.512549	0.00745016
1	NC_044998.1	2725272	0.553262	0.0221778
1	NC_044998.1	2735273	0	4
1	NC_044998.1	2745274	0.17935	0.0849406
1	NC_044998.1	2755275	0.011862	0.650016
1	NC_044998.1	2765276	0.494892	0.486131
1	NC_044998.1	2775277	0.493434	0.0397785
1	NC_044998.1	2785278	0	3
1	NC_044998.1	2795279	1.76873	0.00359165
1	NC_044998.1	2805280	2.13501	0.00473606
1	NC_044998.1	2815281	0.101388	0.139595
1	NC_044998.1	2825282	1.54449	0.0272154
1	NC_044998.1	2835283	1.48157	0.00622813
1	NC_044998.1	2845284	3.86688	0.00164842
1	NC_044998.1	2855285	0.058197	0.0286446
1	NC_044998.1	2865286	0	0.545455
1	NC_044998.1	2875287	0.008503	1.06914
1	NC_044998.1	2885288	0.360158	0.00269502
1	NC_044998.1	2895289	1.3547	0.00168809
1	NC_044998.1	2905290	1.29105	0.0140407
1	NC_044998.1	2915291	0.59066	0.0391924
1	NC_044998.1	2925292	0.148163	0.0216976
1	NC_044998.1	2935293	0.329321	0.0234027
1	NC_044998.1	2945294	0.331589	0.0206778
1	NC_044998.1	2955295	0.352869	0.0489181
1	NC_044998.1	2965296	7.21225	0.00150767
1	NC_044998.1	2975297	0.182324	0.0881159
1	NC_044998.1	2985298	0.130241	0.0457142
1	NC_044998.1	2995299	0	0.8
1	NC_044998.1	3005300	0.64378	0.00759919
1	NC_044998.1	3015301	0.185891	0.202777
1	NC_044998.1	3025302	0.022866	0.403303
1	NC_044998.1	3035303	1.26575	0.0147386
1	NC_044998.1	3045304	0.969321	0.0267128
1	NC_044998.1	3055305	1.39962	0.0323914
1	NC_044998.1	3065306	0.735268	0.00508106
1	NC_044998.1	3075307	0	6
1	NC_044998.1	3085308	0.018489	0.262142
1	NC_044998.1	3095309	0	6
1	NC_044998.1	3105310	0.982459	0.0131433
1	NC_044998.1	3115311	0	1200
1	NC_044998.1	3125312	0.5513	0.0686711
1	NC_044998.1	3135313	0.617994	0.00878393
1	NC_044998.1	3145314	0.925134	0.0132086
1	NC_044998.1	3155315	0	4
1	NC_044998.1	3165316	0.018593	0.156501
1	NC_044998.1	3175317	0.420167	0.0530258
1	NC_044998.1	3185318	1.09825	0.00891637
1	NC_044998.1	3195319	1.09931	0.0118456
1	NC_044998.1	3205320	0.844317	0.00432009
1	NC_044998.1	3215321	0.01655	0.761322
1	NC_044998.1	3225322	0.080972	1.60875
1	NC_044998.1	3235323	0.410957	0.0222488
1	NC_044998.1	3245324	0.028114	0.245506
1	NC_044998.1	3255325	1.51821	0.007806
1	NC_044998.1	3265326	2.04174	0.00388558
1	NC_044998.1	3275327	0.258179	0.282473
1	NC_044998.1	3285328	0.012323	0.297124
1	NC_044998.1	3295329	0	1.71429
1	NC_044998.1	3305330	1.35385	0.0134316
1	NC_044998.1	3315331	0	0.342857
1	NC_044998.1	3325332	1.69157	0.00716423
1	NC_044998.1	3335333	0.286195	99.8187
1	NC_044998.1	3345334	1.20154	0.00765853
1	NC_044998.1	3355335	0.191345	0.029621
1	NC_044998.1	3365336	0.134362	0.0319877
1	NC_044998.1	3375337	0.006795	0.0850024
1	NC_044998.1	3385338	0.01981	0.272892
1	NC_044998.1	3395339	2.79282	0.00820441
1	NC_044998.1	3405340	0.088413	0.158939
1	NC_044998.1	3415341	0.622561	0.145088
1	NC_044998.1	3425342	0	4
1	NC_044998.1	3435343	0	4
1	NC_044998.1	3445344	0.000937	0.625967
1	NC_044998.1	3455345	3.23491	0.00452963
1	NC_044998.1	3465346	0.095206	0.207022
1	NC_044998.1	3475347	0.001247	0.0748675
1	NC_044998.1	3485348	0	2.4
1	NC_044998.1	3495349	0	12
1	NC_044998.1	3505350	0.848649	0.00640623
1	NC_044998.1	3515351	0.248738	0.142059
1	NC_044998.1	3525352	0	1.33333
1	NC_044998.1	3535353	1.15023	0.0115622
1	NC_044998.1	3545354	2.63123	0.000892715
1	NC_044998.1	3555355	0.080972	160.875
1	NC_044998.1	3565356	0	0.363636
1	NC_044998.1	3575357	0.019382	0.250476
1	NC_044998.1	3585358	0	1.71429
1	NC_044998.1	3595359	0.607438	0.116621
1	NC_044998.1	3605360	0.046015	0.0376853
1	NC_044998.1	3615361	0.515483	0.0245989
1	NC_044998.1	3625362	0.087299	0.0954095
1	NC_044998.1	3635363	0.520612	0.0251523
1	NC_044998.1	3645364	0.464711	0.503097
1	NC_044998.1	3655365	0.340628	0.193715
1	NC_044998.1	3665366	0	1200
1	NC_044998.1	3675367	0.092354	0.789254
1	NC_044998.1	3685368	0.060655	0.096811
1	NC_044998.1	3695369	0.384363	0.0139416
1	NC_044998.1	3705370	0.120181	0.0252363
1	NC_044998.1	3715371	0.029422	0.443089
1	NC_044998.1	3725372	0.000502	0.0891258
1	NC_044998.1	3735373	0	12
1	NC_044998.1	3745374	0.474535	0.133313
1	NC_044998.1	3755375	4.34205	0.000698775
1	NC_044998.1	3765376	0.210474	0.143468
1	NC_044998.1	3775377	1.81014	0.0101801
1	NC_044998.1	3785378	0.055728	0.0455055
1	NC_044998.1	3795379	0.025845	0.131432
1	NC_044998.1	3805380	0.288356	0.144733
1	NC_044998.1	3815381	0.148942	0.0535463
1	NC_044998.1	3825382	3.81384	0.00352357
1	NC_044998.1	3835383	0	4
1	NC_044998.1	3845384	2.11044	0.00989849
1	NC_044998.1	3855385	0.084031	0.0724746
1	NC_044998.1	3865386	0.527894	0.0110031
1	NC_044998.1	3875387	0.001791	0.0947844
1	NC_044998.1	3885388	1.26535	0.00904829
1	NC_044998.1	3895389	0.362553	0.0276383
1	NC_044998.1	3905390	1.24594	0.00261354
1	NC_044998.1	3915391	0.373929	0.0131029
1	NC_044998.1	3925392	0.100972	0.0556152
1	NC_044998.1	3935393	0	0.0167832
1	NC_044998.1	3945394	0.36562	0.0229845
1	NC_044998.1	3955395	0	1.5
1	NC_044998.1	3965396	2.33146	0.0133552
1	NC_044998.1	3975397	0.885141	0.0108609
1	NC_044998.1	3985398	0	2.4
1	NC_044998.1	3995399	0	12
1	NC_044998.1	4005400	0.431214	0.0178558
1	NC_044998.1	4015401	1.09344	0.0446411
1	NC_044998.1	4025402	0	0.571429
1	NC_044998.1	4035403	0.011857	2.60038
1	NC_044998.1	4045404	0.022323	0.0624665
1	NC_044998.1	4055405	1.13192	0.00368862
1	NC_044998.1	4065406	0.105522	0.0969869
1	NC_044998.1	4075407	0.081096	0.00865431
1	NC_044998.1	4085408	0	3
1	NC_044998.1	4095409	0	2.4
1	NC_044998.1	4105410	0.008498	213.856
1	NC_044998.1	4115411	0	0.461539
1	NC_044998.1	4125412	0	0.8
1	NC_044998.1	4135413	0.008081	0.275867
1	NC_044998.1	4145414	0.342848	0.105962
1	NC_044998.1	4155415	0.008851	0.70892
1	NC_044998.1	4165416	0.608824	0.0213765
1	NC_044998.1	4175417	0	0.857143
1	NC_044998.1	4185418	0	1.71429
1	NC_044998.1	4195419	0.07838	0.0623994
1	NC_044998.1	4215421	0.000198	0.012035
1	NC_044998.1	4225422	0.042499	0.0589326
1	NC_044998.1	4235423	0.038671	0.161343
1	NC_044998.1	4245424	0	4
1	NC_044998.1	4255425	0.313422	0.0302205
1	NC_044998.1	4265426	0.816677	0.0251946
1	NC_044998.1	4275427	0.003185	0.0741621
1	NC_044998.1	4285428	0	12
1	NC_044998.1	4295429	0	0.352941
1	NC_044998.1	4305430	0	1.2
1	NC_044998.1	4315431	0.012247	0.992371
1	NC_044998.1	4325432	0	12
1	NC_044998.1	4335433	0.011953	0.259552
1	NC_044998.1	4345434	1.02946	0.0351793
1	NC_044998.1	4355435	0.105092	0.238281
1	NC_044998.1	4365436	0.069427	0.341315
1	NC_044998.1	4375437	0.5886	0.00918767
1	NC_044998.1	4385438	0	2
1	NC_044998.1	4395439	0.243791	0.0821996
1	NC_044998.1	4405440	0.070362	0.0149564
1	NC_044998.1	4415441	0.008124	0.101362
1	NC_044998.1	4425442	0.958688	0.0078871
1	NC_044998.1	4435443	0.011857	0.650096
1	NC_044998.1	4445444	0.083458	0.39722
1	NC_044998.1	4455445	0.114167	0.0444413
1	NC_044998.1	4465446	0.492756	0.0434602
1	NC_044998.1	4475447	0.234985	74.1269
1	NC_044998.1	4485448	0	1.2
1	NC_044998.1	4495449	0.767753	0.0173525
1	NC_044998.1	4505450	0.293612	0.00134841
1	NC_044998.1	4515451	0.125325	0.00626751
1	NC_044998.1	4525452	0.000743	4.04287
1	NC_044998.1	4535453	0.488203	0.282591
1	NC_044998.1	4545454	0.023122	0.209119
1	NC_044998.1	4555455	2.1052	0.0050579
1	NC_044998.1	4565456	3.37106	0.00553442
1	NC_044998.1	4575457	0.976481	0.00949995
1	NC_044998.1	4585458	0.502307	0.150227
1	NC_044998.1	4595459	0.037728	0.264575
1	NC_044998.1	4605460	0	1.5
1	NC_044998.1	4615461	0.011857	0.866793
1	NC_044998.1	4625462	0	6
1	NC_044998.1	4635463	1.28978	0.0161567
1	NC_044998.1	4645464	0.228526	0.00646989
1	NC_044998.1	4655465	0.012247	0.992371
1	NC_044998.1	4665466	0.28009	0.146009
1	NC_044998.1	4675467	0.068831	0.211439
1	NC_044998.1	4685468	0.199958	0.0130592
1	NC_044998.1	4695469	0.029417	0.443115
1	NC_044998.1	4705470	1.43353	0.00983033
1	NC_044998.1	4715471	2.07025	0.0165684
1	NC_044998.1	4725472	0	0.857143
1	NC_044998.1	4735473	0	0.357251
1	NC_044998.1	4745474	0.153201	0.0559448
1	NC_044998.1	4755475	0	1.2
1	NC_044998.1	4765476	0.495323	0.0320475
1	NC_044998.1	4775477	0	1.5
1	NC_044998.1	4785478	0.026014	0.15463
1	NC_044998.1	4795479	0	6
1	NC_044998.1	4805480	0	1200
1	NC_044998.1	4815481	0.992099	0.0094676
1	NC_044998.1	4825482	0.727503	0.165305
1	NC_044998.1	4835483	0.491965	0.0516441
1	NC_044998.1	4845484	0.422925	0.111504
1	NC_044998.1	4855485	0.257778	0.037634
1	NC_044998.1	4865486	0.027472	0.0574301
1	NC_044998.1	4875487	0.625417	0.00831424
1	NC_044998.1	4885488	0.111009	0.229305
1	NC_044998.1	4895489	0.111882	0.0170824
1	NC_044998.1	4905490	1.32991	0.0201325
1	NC_044998.1	4915491	0.466811	0.108215
1	NC_044998.1	4925492	0.277954	0.0902156
1	NC_044998.1	4935493	1.01504	0.012243
1	NC_044998.1	4945494	0.168245	0.0578989
1	NC_044998.1	4955495	0.066843	0.280373
1	NC_044998.1	4965496	0.081131	0.00181672
1	NC_044998.1	4975497	1.51814	0.00453045
1	NC_044998.1	4985498	0.130292	0.306332
1	NC_044998.1	4995499	0.044666	0.0603978
1	NC_044998.1	5005500	0.475939	0.106361
1	NC_044998.1	5015501	0	12
1	NC_044998.1	5025502	1.82106	0.00453484
1	NC_044998.1	5035503	0.137779	0.0711053
1	NC_044998.1	5045504	0.090915	0.0273191
1	NC_044998.1	5055505	0.009776	0.150676
1	NC_044998.1	5065506	0.306495	0.00576107
1	NC_044998.1	5075507	0.141226	0.00640862
1	NC_044998.1	5085508	0	0.521739
1	NC_044998.1	5095509	0.010633	0.173897
1	NC_044998.1	5105510	0.294151	0.00402495
1	NC_044998.1	5115511	0.138991	0.015264
1	NC_044998.1	5125512	3.06176	0.0048571
1	NC_044998.1	5135513	0.6832	0.0164805
1	NC_044998.1	5145514	0.053149	0.0638331
1	NC_044998.1	5155515	0.013533	0.849314
1	NC_044998.1	5165516	0	1.33333
1	NC_044998.1	5175517	0.736279	0.0166009
1	NC_044998.1	5185518	0.263712	0.0315977
1	NC_044998.1	5195519	0.083645	0.132535
1	NC_044998.1	5205520	0.617608	0.013394
1	NC_044998.1	5215521	0.080971	0.804387
1	NC_044998.1	5225522	3.12828	0.00586876
1	NC_044998.1	5235523	0.437492	0.0555762
1	NC_044998.1	5245524	0.012247	297.711
1	NC_044998.1	5255525	1.9472	0.0199324
1	NC_044998.1	5265526	0.644499	0.237705
1	NC_044998.1	5275527	0.514615	0.0901833
1	NC_044998.1	5285528	0	0.857143
1	NC_044998.1	5295529	0.216199	0.0516259
1	NC_044998.1	5305530	0.012247	1.48856
1	NC_044998.1	5315531	0	1.5
1	NC_044998.1	5325532	0.170867	0.0592306
1	NC_044998.1	5335533	0.011857	0.650096
1	NC_044998.1	5345534	0.588314	0.00178642
1	NC_044998.1	5355535	0	12
1	NC_044998.1	5365536	2.58563	0.00597592
1	NC_044998.1	5375537	0.069537	1.27439
1	NC_044998.1	5385538	0.016554	0.326253
1	NC_044998.1	5395539	0.100827	0.195412
1	NC_044998.1	5405540	0.021653	0.557186
1	NC_044998.1	5415541	1.09702	0.0172068
1	NC_044998.1	5425542	0.68412	0.0254351
1	NC_044998.1	5435543	0.186851	0.0669668
1	NC_044998.1	5445544	1.14643	0.00313728
1	NC_044998.1	5455545	0.340184	0.0257785
1	NC_044998.1	5465546	0.233003	0.224092
1	NC_044998.1	5475547	0.01783	0.307161
1	NC_044998.1	5485548	0.827426	0.0521577
1	NC_044998.1	5495549	0.936739	0.0181042
1	NC_044998.1	5505550	0.9226	0.0203808
1	NC_044998.1	5515551	0	0.6
1	NC_044998.1	5525552	0.044233	0.0959001
1	NC_044998.1	5535553	2.0559	0.00585631
1	NC_044998.1	5545554	0.14272	0.0506097
1	NC_044998.1	5555555	0.213815	0.0543682
1	NC_044998.1	5565556	0	1.71429
1	NC_044998.1	5575557	0	2.4
1	NC_044998.1	5585558	0.158503	0.00344552
1	NC_044998.1	5595559	0.47229	0.00568222
1	NC_044998.1	5605560	0.110507	0.135622
1	NC_044998.1	5615561	0	1.33333
1	NC_044998.1	5625562	2.96712	0.00658829
1	NC_044998.1	5635563	0.778241	0.0121296
1	NC_044998.1	5645564	1.10586	0.431001
1	NC_044998.1	5655565	0.040383	0.091887
1	NC_044998.1	5665566	0.38883	0.028459
1	NC_044998.1	5675567	0.736456	0.0241146
1	NC_044998.1	5685568	1.90891	0.0048568
1	NC_044998.1	5695569	0.368902	0.0372032
1	NC_044998.1	5705570	0.33421	0.204386
1	NC_044998.1	5715571	0.857732	0.00841137
1	NC_044998.1	5725572	0.783392	0.0353959
1	NC_044998.1	5735573	0.783195	0.0332318
1	NC_044998.1	5745574	0.012361	0.109783
1	NC_044998.1	5755575	0.327977	0.00426057
1	NC_044998.1	5765576	0.089767	0.0243879
1	NC_044998.1	5775577	0	1.2
1	NC_044998.1	5785578	0.012247	297.711
1	NC_044998.1	5795579	3.05573	0.00474779
1	NC_044998.1	5805580	0.307569	0.0908278
1	NC_044998.1	5815581	0.248563	0.0364974
1	NC_044998.1	5825582	0.081598	0.114268
1	NC_044998.1	5835583	0.07949	0.0779239
1	NC_044998.1	5845584	0.012247	0.992371
1	NC_044998.1	5855585	3.48153	0.00193128
1	NC_044998.1	5865586	0.13798	0.0576091
1	NC_044998.1	5875587	3.13515	0.00437922
1	NC_044998.1	5885588	3.8591	0.00596835
1	NC_044998.1	5895589	0.122939	0.0536205
1	NC_044998.1	5905590	2.25552	0.00392087
1	NC_044998.1	5915591	1.53598	0.0120416
1	NC_044998.1	5925592	0.011912	2.5974
1	NC_044998.1	5935593	3.04945	0.00136354
1	NC_044998.1	5945594	1.08526	0.00977654
1	NC_044998.1	5955595	0	4
1	NC_044998.1	5965596	0.093424	0.073148
1	NC_044998.1	5975597	1.58819	0.00251316
1	NC_044998.1	5985598	0.01655	2.28397
1	NC_044998.1	5995599	0.576033	0.0356608
1	NC_044998.1	6005600	0.486321	0.00667958
1	NC_044998.1	6015601	0.177937	0.115949
1	NC_044998.1	6025602	0.012375	0.118681
1	NC_044998.1	6035603	0	6
1	NC_044998.1	6045604	0.123698	0.0589503
1	NC_044998.1	6055605	0.272654	0.0377902
1	NC_044998.1	6065606	0	1.33333
1	NC_044998.1	6075607	0.266111	0.0886559
1	NC_044998.1	6085608	0	1200
1	NC_044998.1	6095609	0.630198	0.0102602
1	NC_044998.1	6105610	0.45993	1.23939
1	NC_044998.1	6115611	0.621481	0.260216
1	NC_044998.1	6125612	0.695795	0.0266669
1	NC_044998.1	6135613	3.45563	0.00395423
1	NC_044998.1	6145614	0	4
1	NC_044998.1	6155615	0.013627	0.34235
1	NC_044998.1	6165616	0.403844	0.0439807
1	NC_044998.1	6175617	0.859462	0.0123629
1	NC_044998.1	6185618	0.645582	0.0241993
1	NC_044998.1	6195619	0.03211	0.0939544
1	NC_044998.1	6205620	0.358566	0.025432
1	NC_044998.1	6215621	0.129825	0.235724
1	NC_044998.1	6225622	0	12
1	NC_044998.1	6235623	0.623733	0.00377703
1	NC_044998.1	6245624	0	0.631579
1	NC_044998.1	6255625	0.201136	0.0389145
1	NC_044998.1	6265626	0	0.980113
1	NC_044998.1	6275627	0.281362	0.0208745
1	NC_044998.1	6285628	0.004443	0.386451
1	NC_044998.1	6295629	0.751133	0.0113498
1	NC_044998.1	6305630	0.609409	0.0127796
1	NC_044998.1	6315631	0	6
1	NC_044998.1	6325632	0	0.923077
1	NC_044998.1	6335633	0.488227	0.012938
1	NC_044998.1	6345634	0.425531	0.0253864
1	NC_044998.1	6355635	1.11329	0.0112264
1	NC_044998.1	6365636	0.914836	0.0102094
1	NC_044998.1	6375637	0	6
1	NC_044998.1	6385638	9.62293	0.00142107
1	NC_044998.1	6395639	0.249712	0.0309558
1	NC_044998.1	6405640	1.11865	0.00674355
1	NC_044998.1	6415641	1.00163	0.00838481
1	NC_044998.1	6425642	0.609974	0.00741683
1	NC_044998.1	6435643	0.023093	0.181904
1	NC_044998.1	6445644	0.037537	0.112089
1	NC_044998.1	6455645	0	0.344474
1	NC_044998.1	6465646	4.05315	0.0024188
1	NC_044998.1	6475647	0	2.4
1	NC_044998.1	6485648	0.473736	0.179063
1	NC_044998.1	6495649	0.597316	0.037701
1	NC_044998.1	6505650	0.051611	0.0802597
1	NC_044998.1	6515651	1.54931	0.0046808
1	NC_044998.1	6525652	0.0132	0.167759
1	NC_044998.1	6535653	0.034984	0.289459
1	NC_044998.1	6545654	0.024946	0.581156
1	NC_044998.1	6555655	0	6
1	NC_044998.1	6565656	0.490085	0.0334123
1	NC_044998.1	6575657	1.3667	0.0291765
1	NC_044998.1	6585658	0.416526	0.0871154
1	NC_044998.1	6595659	0	6
1	NC_044998.1	6605660	0.009201	0.127198
1	NC_044998.1	6615661	0.017349	0.143878
1	NC_044998.1	6625662	0.012247	0.744278
1	NC_044998.1	6635663	0.344098	0.605824
1	NC_044998.1	6645664	2.73269	0.0023915
1	NC_044998.1	6655665	0.213885	0.0237253
1	NC_044998.1	6665666	0.267666	0.165981
1	NC_044998.1	6675667	0.026275	0.344085
1	NC_044998.1	6685668	0.024318	1.99848
1	NC_044998.1	6695669	0.166066	0.163426
1	NC_044998.1	6705670	0	2.4
1	NC_044998.1	6715671	0.472087	0.0405495
1	NC_044998.1	6725672	1.0747	0.0295553
1	NC_044998.1	6735673	0.014372	0.0861321
1	NC_044998.1	6745674	1.28164	0.0652749
1	NC_044998.1	6755675	0.58445	0.0660495
1	NC_044998.1	6765676	0.011857	0.371482
1	NC_044998.1	6775677	0.244656	0.0619264
1	NC_044998.1	6785678	0	1.5
1	NC_044998.1	6795679	0.537202	0.0362307
1	NC_044998.1	6805680	1.27348	0.0114775
1	NC_044998.1	6815681	0.108042	0.154689
1	NC_044998.1	6825682	1.74165	0.00726662
1	NC_044998.1	6835683	0.608673	0.012048
1	NC_044998.1	6845684	0.019207	0.39196
1	NC_044998.1	6855685	0.306454	0.0262698
1	NC_044998.1	6865686	1.18078	0.0430554
1	NC_044998.1	6875687	0.780103	0.0770433
1	NC_044998.1	6885688	0.237097	0.111637
1	NC_044998.1	6895689	0.090469	0.0254555
1	NC_044998.1	6905690	0.315627	0.481623
1	NC_044998.1	6915691	0.24493	0.0507328
1	NC_044998.1	6925692	0.66838	0.18782
1	NC_044998.1	6935693	0.033622	0.0718561
1	NC_044998.1	6945694	0.000537	0.15093
1	NC_044998.1	6955695	0.543521	0.0349876
1	NC_044998.1	6965696	0.078182	0.155076
1	NC_044998.1	6975697	0.204426	0.0419109
1	NC_044998.1	6985698	0	1.2
1	NC_044998.1	6995699	0.167176	0.230067
1	NC_044998.1	7005700	3.02703	0.00249865
1	NC_044998.1	7015701	0.017408	0.185167
1	NC_044998.1	7025702	0	12
1	NC_044998.1	7035703	0	1.5
1	NC_044998.1	7045704	0	4
1	NC_044998.1	7055705	1.71338	0.00317423
1	NC_044998.1	7065706	0.01213	0.0718796
1	NC_044998.1	7075707	0	1200
1	NC_044998.1	7085708	0.078307	1.03662
1	NC_044998.1	7095709	0.613148	0.0186299
1	NC_044998.1	7105710	0.291392	0.122367
1	NC_044998.1	7115711	0.350106	0.0851258
1	NC_044998.1	7125712	0.411669	0.0210808
1	NC_044998.1	7135713	0.246786	0.006721
1	NC_044998.1	7145714	0.074465	0.0044998
1	NC_044998.1	7155715	3.43377	0.00321529
1	NC_044998.1	7165716	0.582328	0.00379753
1	NC_044998.1	7175717	0.913568	0.0365752
1	NC_044998.1	7185718	0.393811	3.40529
1	NC_044998.1	7195719	0.046537	0.28588
1	NC_044998.1	7205720	1.32551	0.00915642
1	NC_044998.1	7215721	0.656991	0.0441335
1	NC_044998.1	7225722	0.282611	0.0249815
1	NC_044998.1	7235723	0.52043	0.136495
1	NC_044998.1	7245724	0.82358	0.131293
1	NC_044998.1	7255725	0.028516	0.35206
1	NC_044998.1	7265726	0.167963	0.0198582
1	NC_044998.1	7275727	0.355691	0.0790133
1	NC_044998.1	7285728	0.145869	0.0649967
1	NC_044998.1	7295729	0.017408	1.85167
1	NC_044998.1	7305730	0.028355	0.736153
1	NC_044998.1	7315731	0.011856	0.866807
1	NC_044998.1	7325732	0.662639	0.0256823
1	NC_044998.1	7335733	0	3
1	NC_044998.1	7345734	0	4
1	NC_044998.1	7355735	1.90007	0.00445074
1	NC_044998.1	7365736	0	0.631579
1	NC_044998.1	7375737	0.041285	0.391446
1	NC_044998.1	7385738	0	0.923077
1	NC_044998.1	7395739	0.038834	0.126382
1	NC_044998.1	7405740	0.674079	0.0272705
1	NC_044998.1	7415741	0.231535	0.00701838
1	NC_044998.1	7425742	1.26356	0.0163445
1	NC_044998.1	7435743	0.01655	0.326275
1	NC_044998.1	7445744	0.172922	0.0205807
1	NC_044998.1	7455745	0	4
1	NC_044998.1	7465746	5.78496	0.00176302
1	NC_044998.1	7475747	0.011825	0.32531
1	NC_044998.1	7485748	0.076139	0.727127
1	NC_044998.1	7495749	0.553575	0.02714
1	NC_044998.1	7505750	0	0.923077
1	NC_044998.1	7515751	0	12
1	NC_044998.1	7525752	2.04098	0.00430444
1	NC_044998.1	7535753	0.009805	0.0366854
1	NC_044998.1	7545754	0.514658	0.0337629
1	NC_044998.1	7555755	0.306389	0.117861
1	NC_044998.1	7565756	2.18776	0.00541854
1	NC_044998.1	7575757	0	0.0151899
1	NC_044998.1	7585758	0.020647	0.248926
1	NC_044998.1	7595759	1.64783	0.00554381
1	NC_044998.1	7605760	0.286183	0.0509721
1	NC_044998.1	7615761	1.14677	0.00708932
1	NC_044998.1	7625762	0.822373	0.00976189
1	NC_044998.1	7635763	0.299896	0.0614638
1	NC_044998.1	7645764	0.301218	0.00694962
1	NC_044998.1	7655765	2.03253	0.00863866
1	NC_044998.1	7665766	0	12
1	NC_044998.1	7675767	1.70963	0.00885519
1	NC_044998.1	7685768	0.577171	0.0171831
1	NC_044998.1	7695769	0.775545	0.0168764
1	NC_044998.1	7705770	0.18349	0.0141601
1	NC_044998.1	7715771	0.154447	0.276551
1	NC_044998.1	7725772	0.078144	0.367515
1	NC_044998.1	7735773	0.11375	0.0686459
1	NC_044998.1	7745774	0.22414	0.0242114
1	NC_044998.1	7755775	1.06294	0.00586307
1	NC_044998.1	7765776	0.067036	0.114211
1	NC_044998.1	7775777	2.49065	0.00254104
1	NC_044998.1	7785778	0.756118	35.5245
1	NC_044998.1	7795779	3.69164	0.00619152
1	NC_044998.1	7805780	0.072972	0.114952
1	NC_044998.1	7815781	2.47406	0.00513004
1	NC_044998.1	7825782	2.84399	0.00647382
1	NC_044998.1	7835783	0	1.09091
1	NC_044998.1	7845784	0.059401	0.0604158
1	NC_044998.1	7855785	0.085849	0.105431
1	NC_044998.1	7865786	0.519363	0.00212371
1	NC_044998.1	7875787	2.0923	0.00338536
1	NC_044998.1	7885788	3.17217	0.00717544
1	NC_044998.1	7895789	0.017094	0.232391
1	NC_044998.1	7905790	0.652247	0.0314216
1	NC_044998.1	7915791	0.041618	0.0246192
1	NC_044998.1	7925792	1.27657	0.0636751
1	NC_044998.1	7935793	0.133941	0.0716786
1	NC_044998.1	7945794	0.088445	0.0921423
1	NC_044998.1	7955795	0.709512	0.0449065
1	NC_044998.1	7965796	0.009107	0.101333
1	NC_044998.1	7975797	2.11655	0.00167283
1	NC_044998.1	7985798	2.94471	0.004762
1	NC_044998.1	7995799	0	0.6
1	NC_044998.1	8005800	0.104595	0.0306857
1	NC_044998.1	8015801	0.035399	0.0909483
1	NC_044998.1	8025802	0.13323	0.0414356
1	NC_044998.1	8035803	2.80065	0.00403431
1	NC_044998.1	8045804	0.229594	0.0680994
1	NC_044998.1	8055805	0.496835	0.0205697
1	NC_044998.1	8065806	0.015913	0.0445982
1	NC_044998.1	8075807	2.35664	0.00697698
1	NC_044998.1	8085808	0.004529	0.118493
1	NC_044998.1	8095809	0.024485	0.0456061
1	NC_044998.1	8105810	0.011665	0.101433
1	NC_044998.1	8115811	0.11985	0.0711325
1	NC_044998.1	8125812	1.74147	0.0056522
1	NC_044998.1	8135813	0.097052	0.287753
1	NC_044998.1	8145814	0.02491	0.0108823
1	NC_044998.1	8155815	1.77195	0.0041832
1	NC_044998.1	8165816	0.337823	0.0565082
1	NC_044998.1	8175817	0.121209	0.372599
1	NC_044998.1	8185818	9.3e-05	0.381875
1	NC_044998.1	8195819	0	0.705882
1	NC_044998.1	8205820	0	3
1	NC_044998.1	8215821	0	0.545455
1	NC_044998.1	8225822	1.71632	0.00346138
1	NC_044998.1	8235823	0.634217	0.0207362
1	NC_044998.1	8245824	0.199273	0.0297234
1	NC_044998.1	8255825	0	6
1	NC_044998.1	8265826	3.10842	0.00541581
1	NC_044998.1	8275827	0.751171	0.00828109
1	NC_044998.1	8285828	1.31662	0.0758587
1	NC_044998.1	8295829	0.018424	0.610511
1	NC_044998.1	8305830	0.485124	0.0242215
1	NC_044998.1	8315831	0.123099	0.469956
1	NC_044998.1	8325832	0.196966	0.0370787
1	NC_044998.1	8335833	0.054117	0.0146031
1	NC_044998.1	8345834	0.037134	0.0470434
1	NC_044998.1	8355835	0.036697	0.00961195
1	NC_044998.1	8365836	0.094464	0.00706796
1	NC_044998.1	8375837	0.064469	0.0911121
1	NC_044998.1	8385838	1.94543	0.00353534
1	NC_044998.1	8395839	3.67828	0.00285854
1	NC_044998.1	8405840	0.307987	0.288566
1	NC_044998.1	8415841	0.687835	0.0114871
1	NC_044998.1	8425842	0.415419	0.0209439
1	NC_044998.1	8435843	0	12
1	NC_044998.1	8445844	0.32888	0.0111351
1	NC_044998.1	8455845	0.16453	0.0233073
1	NC_044998.1	8465846	0.067033	0.253288
1	NC_044998.1	8475847	1.78103	0.00573566
1	NC_044998.1	8485848	0	6
1	NC_044998.1	8495849	0.125195	0.00716575
1	NC_044998.1	8505850	0.361786	0.0369695
1	NC_044998.1	8515851	0.008368	0.0945041
1	NC_044998.1	8525852	0.241542	0.155121
1	NC_044998.1	8535853	0.037651	0.0688946
1	NC_044998.1	8545854	0.019819	0.6139
1	NC_044998.1	8555855	1.2075	0.0265403
1	NC_044998.1	8565856	0.462048	0.0703145
1	NC_044998.1	8575857	0.637835	0.432568
1	NC_044998.1	8585858	0.011855	2.60057
1	NC_044998.1	8595859	0.012247	297.711
1	NC_044998.1	8605860	0.918221	0.00340899
1	NC_044998.1	8615861	0.669435	0.0225388
1	NC_044998.1	8625862	0.008534	0.194267
1	NC_044998.1	8635863	0.661268	0.141333
1	NC_044998.1	8645864	0	0.8
1	NC_044998.1	8655865	0.30717	0.00418239
1	NC_044998.1	8665866	0.349776	0.0200361
1	NC_044998.1	8675867	5.83915	0.00214221
1	NC_044998.1	8685868	0.012247	0.744278
1	NC_044998.1	8695869	1.62996	0.0144598
1	NC_044998.1	8705870	0	0.444444
1	NC_044998.1	8715871	0.359964	0.000736923
1	NC_044998.1	8725872	0.218058	0.0176377
1	NC_044998.1	8735873	0.012247	2.97711
1	NC_044998.1	8745874	0	0.545455
1	NC_044998.1	8755875	0.017408	1.85167
1	NC_044998.1	8765876	0.76693	0.0157333
1	NC_044998.1	8775877	0.755015	0.015819
1	NC_044998.1	8785878	0.242679	0.0635411
1	NC_044998.1	8795879	0.183507	0.0418838
1	NC_044998.1	8805880	0.106861	0.110366
1	NC_044998.1	8815881	0.214117	0.0702172
1	NC_044998.1	8825882	0.799943	0.168772
1	NC_044998.1	8835883	0.598615	0.0222007
1	NC_044998.1	8845884	0.011857	2.60038
1	NC_044998.1	8855885	0.284123	0.0377486
1	NC_044998.1	8865886	0.062855	0.202176
1	NC_044998.1	8875887	0.621185	0.00402543
1	NC_044998.1	8885888	0.395913	0.0220419
1	NC_044998.1	8895889	0.012424	0.329412
1	NC_044998.1	8905890	0.011224	0.263202
1	NC_044998.1	8915891	0	12
1	NC_044998.1	8925892	0.482412	0.4032
1	NC_044998.1	8935893	0.260107	0.0161564
1	NC_044998.1	8945894	0	0.857143
1	NC_044998.1	8955895	2.51861	0.00605671
1	NC_044998.1	8965896	0.359153	0.0161876
1	NC_044998.1	8975897	0.614113	0.0701156
1	NC_044998.1	8985898	0.100905	0.0944814
1	NC_044998.1	8995899	0.638212	0.0259004
1	NC_044998.1	9005900	0.177338	0.180514
1	NC_044998.1	9015901	0.924679	0.0290951
1	NC_044998.1	9025902	0.286171	0.0905167
1	NC_044998.1	9035903	0	0.963425
1	NC_044998.1	9045904	0.353539	0.0116046
1	NC_044998.1	9055905	0	0.461539
1	NC_044998.1	9065906	0.604259	0.044978
1	NC_044998.1	9075907	0.102991	0.0584452
1	NC_044998.1	9085908	7.05087	0.00153124
1	NC_044998.1	9095909	0.315949	0.0560919
1	NC_044998.1	9105910	0.6072	0.0462136
1	NC_044998.1	9115911	0.080866	0.109744
1	NC_044998.1	9125912	0.080972	160.875
1	NC_044998.1	9135913	0.153315	0.0491368
1	NC_044998.1	9145914	0	0.631579
1	NC_044998.1	9155915	1.09244	0.00543257
1	NC_044998.1	9165916	0.807822	0.0664759
1	NC_044998.1	9175917	0.016019	0.229951
1	NC_044998.1	9185918	0.315738	0.037861
1	NC_044998.1	9195919	1.58871	0.00574221
1	NC_044998.1	9205920	0.575201	0.0108372
1	NC_044998.1	9215921	0.160202	0.396987
1	NC_044998.1	9225922	0.212789	0.217798
1	NC_044998.1	9235923	1.11012	0.0399655
1	NC_044998.1	9245924	2.51423	0.00425674
1	NC_044998.1	9255925	0.276851	0.134568
1	NC_044998.1	9265926	0.458732	0.128597
1	NC_044998.1	9275927	0.970027	0.00830496
1	NC_044998.1	9285928	0	6
1	NC_044998.1	9295929	1.2626	0.0103841
1	NC_044998.1	9305930	0.377713	0.0284863
1	NC_044998.1	9315931	2.52168	0.00343951
1	NC_044998.1	9325932	0.894654	0.136563
1	NC_044998.1	9335933	0.227568	0.0757908
1	NC_044998.1	9345934	0.718972	0.00637722
1	NC_044998.1	9355935	0	2.4
1	NC_044998.1	9365936	0	1
1	NC_044998.1	9375937	0.645786	0.00469145
1	NC_044998.1	9385938	0.606123	0.0304863
1	NC_044998.1	9395939	0.041218	0.78356
1	NC_044998.1	9405940	0.119791	0.676066
1	NC_044998.1	9415941	0.254266	0.00560021
1	NC_044998.1	9425942	0.015034	0.415996
1	NC_044998.1	9435943	2.20091	0.0100424
1	NC_044998.1	9445944	0.408984	0.0419608
1	NC_044998.1	9455945	0.245423	0.0367541
1	NC_044998.1	9465946	0	0.631579
1	NC_044998.1	9475947	0.01655	0.228396
1	NC_044998.1	9485948	0.084349	0.0236086
1	NC_044998.1	9495949	2.76753	0.00732257
1	NC_044998.1	9505950	0.870141	0.00023471
1	NC_044998.1	9515951	0	4
1	NC_044998.1	9525952	0.292749	0.00502941
1	NC_044998.1	9535953	0	1.33333
1	NC_044998.1	9545954	0	0.375
1	NC_044998.1	9555955	0.061486	0.0873655
1	NC_044998.1	9565956	0	4
1	NC_044998.1	9575957	0.211525	0.880139
1	NC_044998.1	9585958	1.24537	0.0163594
1	NC_044998.1	9595959	2.21532	0.0125089
1	NC_044998.1	9605960	0	12
1	NC_044998.1	9615961	1.3032	0.00135528
1	NC_044998.1	9625962	0.013951	0.11246
1	NC_044998.1	9635963	0.060772	0.0263744
1	NC_044998.1	9645964	1.95417	0.00588248
1	NC_044998.1	9655965	2.25736	0.0106228
1	NC_044998.1	9665966	0.2557	0.00784933
1	NC_044998.1	9675967	0.00028	0.0539069
1	NC_044998.1	9685968	1.16136	0.0277261
1	NC_044998.1	9695969	0.371172	0.00907954
1	NC_044998.1	9705970	0	0.222222
1	NC_044998.1	9715971	0.391677	0.0969228
1	NC_044998.1	9725972	0	1.71429
1	NC_044998.1	9735973	0.012617	0.202823
1	NC_044998.1	9745974	0	0.413793
1	NC_044998.1	9755975	0.254806	0.00411168
1	NC_044998.1	9765976	0	12
1	NC_044998.1	9775977	0.010922	0.258185
1	NC_044998.1	9785978	0.966278	0.0331361
1	NC_044998.1	9795979	3.06061	0.00356546
1	NC_044998.1	9805980	0.008466	0.511102
1	NC_044998.1	9815981	0	0.494734
1	NC_044998.1	9825982	0.584862	0.0112217
1	NC_044998.1	9835983	0.829513	0.0569923
1	NC_044998.1	9845984	0.22378	0.0127768
1	NC_044998.1	9855985	0.037598	0.0401679
1	NC_044998.1	9865986	0	0.75
1	NC_044998.1	9875987	0.012248	0.114497
1	NC_044998.1	9885988	0.601916	0.0836452
1	NC_044998.1	9895989	0.011857	2.60037
1	NC_044998.1	9905990	0.073432	0.177902
1	NC_044998.1	9915991	4.7878	0.00125499
1	NC_044998.1	9925992	0.831058	0.0641196
1	NC_044998.1	9935993	0.611059	0.0213954
1	NC_044998.1	9945994	0.387278	0.006059
1	NC_044998.1	9955995	0.101171	0.0421575
1	NC_044998.1	9965996	0.203045	0.0127483
1	NC_044998.1	9975997	0.017135	0.0968086
1	NC_044998.1	9985998	0.078651	0.0227146
1	NC_044998.1	9995999	0.295113	0.0573465
1	NC_044998.1	10006000	0	1200
1	NC_044998.1	10016001	0.384658	0.00627088
1	NC_044998.1	10026002	0.529463	0.00615606
1	NC_044998.1	10036003	0.617096	0.00391208
1	NC_044998.1	10046004	0.506387	0.0744181
1	NC_044998.1	10056005	0.196041	0.0406023
1	NC_044998.1	10066006	0.348669	0.032039
1	NC_044998.1	10076007	0.018458	0.367145
1	NC_044998.1	10086008	0.108756	0.399323
1	NC_044998.1	10096009	1.07789	0.00678907
1	NC_044998.1	10106010	0	12
1	NC_044998.1	10116011	0.130551	0.141881
1	NC_044998.1	10126012	0.388699	0.0426751
1	NC_044998.1	10136013	0.119172	0.0908242
1	NC_044998.1	10146014	0.491929	0.0339959
1	NC_044998.1	10156015	2.3431	0.0036326
1	NC_044998.1	10166016	1.86704	0.013213
1	NC_044998.1	10176017	0	0.8
1	NC_044998.1	10186018	3.27872	0.00276231
1	NC_044998.1	10196019	0.224173	0.0635424
1	NC_044998.1	10206020	2.62881	0.00705037
1	NC_044998.1	10216021	0	1
1	NC_044998.1	10226022	0.083509	0.796508
1	NC_044998.1	10236023	0.028355	0.368077
1	NC_044998.1	10246024	0	2.4
1	NC_044998.1	10256025	0.076189	0.72496
1	NC_044998.1	10266026	0.099436	0.570672
1	NC_044998.1	10276027	0.35354	0.0215227
1	NC_044998.1	10286028	1.16295	0.0185915
1	NC_044998.1	10296029	0.018354	1.12358
1	NC_044998.1	10306030	0.094294	0.312119
1	NC_044998.1	10316031	0	1.71429
1	NC_044998.1	10326032	0.794795	0.0167235
1	NC_044998.1	10336033	6.02672	0.000824955
1	NC_044998.1	10346034	0.842303	0.0802234
1	NC_044998.1	10356035	3.03152	0.00745849
1	NC_044998.1	10366036	0.673661	0.0344529
1	NC_044998.1	10376037	0.062497	0.0395515
1	NC_044998.1	10386038	0.080975	0.268119
1	NC_044998.1	10396039	0.011857	0.866794
1	NC_044998.1	10406040	0.162684	0.0871081
1	NC_044998.1	10416041	0	0.923077
1	NC_044998.1	10426042	0.476399	0.0427979
1	NC_044998.1	10436043	0.076703	0.148878
1	NC_044998.1	10446044	0.089521	0.084695
1	NC_044998.1	10456045	0.703091	0.00424443
1	NC_044998.1	10466046	0.090706	0.0172868
1	NC_044998.1	10476047	1.05775	0.0128133
1	NC_044998.1	10486048	1.69732	0.0131232
1	NC_044998.1	10496049	0.559994	0.0190276
1	NC_044998.1	10506050	0.115442	0.0257532
1	NC_044998.1	10516051	0.903131	0.0127816
1	NC_044998.1	10526052	0.662404	0.0894837
1	NC_044998.1	10536053	0	0.923077
1	NC_044998.1	10546054	1.6963	0.00547744
1	NC_044998.1	10556055	0	0.352941
1	NC_044998.1	10566056	1.19704	0.00803374
1	NC_044998.1	10576057	0	6
1	NC_044998.1	10586058	3.6318	0.00295295
1	NC_044998.1	10596059	0.677194	0.00978976
1	NC_044998.1	10606060	0.021024	0.163995
1	NC_044998.1	10616061	0.01225	0.372101
1	NC_044998.1	10626062	0	0.545455
1	NC_044998.1	10636063	0.030531	0.245746
1	NC_044998.1	10646064	0.01741	0.308605
1	NC_044998.1	10656065	0.304909	0.152248
1	NC_044998.1	10666066	0.467256	0.0121664
1	NC_044998.1	10676067	0.01655	228.397
1	NC_044998.1	10686068	0.4427	1.31958
1	NC_044998.1	10696069	0.304559	0.979092
1	NC_044998.1	10706070	0	1.09091
1	NC_044998.1	10716071	0	0.285714
1	NC_044998.1	10726072	0	0.344467
1	NC_044998.1	10736073	5.09643	0.00522587
1	NC_044998.1	10746074	1.40882	0.00684046
1	NC_044998.1	10756075	0.049731	0.0118404
1	NC_044998.1	10766076	0.138056	0.0837251
1	NC_044998.1	10776077	0.02107	0.216672
1	NC_044998.1	10786078	0.636257	0.0272924
1	NC_044998.1	10796079	0.035078	0.0816001
1	NC_044998.1	10806080	0	0.923077
1	NC_044998.1	10816081	1.19138	0.0104378
1	NC_044998.1	10826082	0.019716	0.745703
1	NC_044998.1	10836083	0.015279	2.32203
1	NC_044998.1	10846084	0.086977	0.120841
1	NC_044998.1	10856085	0.355643	0.0142476
1	NC_044998.1	10866086	0.080972	160.875
1	NC_044998.1	10876087	0.470184	0.377925
1	NC_044998.1	10886088	0.217768	0.0219598
1	NC_044998.1	10896089	0.183052	0.0802008
1	NC_044998.1	10906090	0.139919	0.0312125
1	NC_044998.1	10916091	0.014889	0.17712
1	NC_044998.1	10926092	0.034206	0.134826
1	NC_044998.1	10936093	0.088687	0.0213133
1	NC_044998.1	10946094	0.300385	0.108629
1	NC_044998.1	10956095	0.565399	0.0132975
1	NC_044998.1	10966096	0.074883	0.00809802
1	NC_044998.1	10976097	0	1.09091
1	NC_044998.1	10986098	5.27043	0.00241617
1	NC_044998.1	10996099	0.000111	0.589829
1	NC_044998.1	11006100	0.225197	0.023843
1	NC_044998.1	11016101	0.137205	0.0901486
1	NC_044998.1	11026102	1.33278	0.00661011
1	NC_044998.1	11036103	0	1.5
1	NC_044998.1	11046104	0.004932	0.797189
1	NC_044998.1	11056105	0.780928	0.0142842
1	NC_044998.1	11066106	1.62324	0.00744014
1	NC_044998.1	11076107	0.313428	0.0052466
1	NC_044998.1	11086108	0.851385	0.0152405
1	NC_044998.1	11096109	0.002433	0.79858
1	NC_044998.1	11106110	0.984397	0.00551678
1	NC_044998.1	11116111	0.940157	0.0102404
1	NC_044998.1	11126112	0.521852	0.073311
1	NC_044998.1	11136113	0.395709	0.0223377
1	NC_044998.1	11146114	0.048718	0.251185
1	NC_044998.1	11156115	0.18749	0.176173
1	NC_044998.1	11166116	0.404034	0.0339008
1	NC_044998.1	11176117	1.63203	0.00720054
1	NC_044998.1	11186118	2.71754	0.0139227
1	NC_044998.1	11196119	1.61447	0.015887
1	NC_044998.1	11206120	1.06982	0.19723
1	NC_044998.1	11216121	0	1.5
1	NC_044998.1	11226122	0	0.857143
1	NC_044998.1	11236123	0.120915	0.559298
1	NC_044998.1	11246124	0.469026	0.0266342
1	NC_044998.1	11256125	0.137075	0.028239
1	NC_044998.1	11266126	0.504941	0.0112241
1	NC_044998.1	11276127	0	0.27907
1	NC_044998.1	11286128	4.83502	0.00312999
1	NC_044998.1	11296129	0	6
1	NC_044998.1	11306130	0.229023	0.041833
1	NC_044998.1	11316131	0.141461	0.219641
1	NC_044998.1	11326132	0	3
1	NC_044998.1	11336133	0.197903	0.0452032
1	NC_044998.1	11346134	0.006569	0.178072
1	NC_044998.1	11356135	0.477226	0.00857103
1	NC_044998.1	11366136	0.008498	0.534633
1	NC_044998.1	11376137	0.32314	0.0435077
1	NC_044998.1	11386138	0.081573	0.533979
1	NC_044998.1	11396139	0.378803	0.0152997
1	NC_044998.1	11406140	1.326	0.00695563
1	NC_044998.1	11416141	0.272893	0.301921
1	NC_044998.1	11426142	0.184545	0.0159652
1	NC_044998.1	11436143	0.083252	0.0597644
1	NC_044998.1	11446144	4.73738	0.00205284
1	NC_044998.1	11456145	2.44262	0.00542451
1	NC_044998.1	11466146	0.096292	0.241458
1	NC_044998.1	11476147	0	12
1	NC_044998.1	11486148	4.7e-05	0.561826
1	NC_044998.1	11496149	0	12
1	NC_044998.1	11506150	0.009489	0.52782
1	NC_044998.1	11516151	1.03849	0.00728268
1	NC_044998.1	11526152	0.748019	0.0106274
1	NC_044998.1	11536153	0	1.2
1	NC_044998.1	11546154	0.120748	0.0447028
1	NC_044998.1	11556155	0.558902	0.0439737
1	NC_044998.1	11566156	1.02258	0.00722084
1	NC_044998.1	11576157	0.009705	0.207415
1	NC_044998.1	11586158	0.439559	0.0226267
1	NC_044998.1	11596159	0	0.6
1	NC_044998.1	11606160	0	4
1	NC_044998.1	11616161	0.017409	0.462915
1	NC_044998.1	11626162	1.90936	0.00410428
1	NC_044998.1	11636163	0	3
1	NC_044998.1	11646164	0	1.33333
1	NC_044998.1	11656165	1.46646	0.00827221
1	NC_044998.1	11666166	0.726189	0.0207031
1	NC_044998.1	11676167	0.041365	0.436082
1	NC_044998.1	11686168	0.303545	0.00520292
1	NC_044998.1	11696169	0.045699	0.146389
1	NC_044998.1	11706170	3.86797	0.00227
1	NC_044998.1	11716171	4.14406	0.00278758
1	NC_044998.1	11726172	0	2.4
1	NC_044998.1	11736173	0	6
1	NC_044998.1	11746174	0.646058	0.0324441
1	NC_044998.1	11756175	0.01655	0.570992
1	NC_044998.1	11766176	0.566905	0.00205351
1	NC_044998.1	11776177	0.633611	0.00870819
1	NC_044998.1	11786178	0	0.631579
1	NC_044998.1	11796179	2.93105	0.00209633
1	NC_044998.1	11806180	0.019042	0.0768339
1	NC_044998.1	11816181	1.42488	0.0274763
1	NC_044998.1	11826182	1.16276	0.0413712
1	NC_044998.1	11836183	5e-06	0.20902
1	NC_044998.1	11846184	0.043244	0.0283062
1	NC_044998.1	11856185	1.99229	0.00387641
1	NC_044998.1	11866186	0	4
1	NC_044998.1	11876187	0.017425	0.0638346
1	NC_044998.1	11886188	0.370202	0.022313
1	NC_044998.1	11896189	0	12
1	NC_044998.1	11906190	2.27962	0.00642521
1	NC_044998.1	11916191	0.93385	0.00894127
1	NC_044998.1	11926192	0	12
1	NC_044998.1	11936193	0	1.71429
1	NC_044998.1	11946194	0.052828	0.169438
1	NC_044998.1	11956195	0.012251	0.496105
1	NC_044998.1	11966196	0.108936	0.0677592
1	NC_044998.1	11976197	1.08548	0.00249423
1	NC_044998.1	11986198	0.019479	0.1568
1	NC_044998.1	11996199	4.81693	0.000950205
1	NC_044998.1	12006200	0.346642	0.0437857
1	NC_044998.1	12016201	0.028355	147.231
1	NC_044998.1	12026202	0.019181	0.202692
1	NC_044998.1	12036203	0.255111	0.137381
1	NC_044998.1	12046204	0.34554	0.0634701
1	NC_044998.1	12056205	0.047418	0.140714
1	NC_044998.1	12066206	0.141855	0.0580903
1	NC_044998.1	12076207	0	12
1	NC_044998.1	12086208	0	0.304192
1	NC_044998.1	12096209	0	12
1	NC_044998.1	12106210	0.660024	0.0148459
1	NC_044998.1	12116211	0.368792	0.0894684
1	NC_044998.1	12126212	0.010353	0.172002
1	NC_044998.1	12136213	0.543057	0.00888996
1	NC_044998.1	12146214	1.12506	0.00434985
1	NC_044998.1	12156215	0.281028	0.0428844
1	NC_044998.1	12166216	0.011915	2.59731
1	NC_044998.1	12176217	0.107884	0.140326
1	NC_044998.1	12186218	0.083566	0.204495
1	NC_044998.1	12196219	0	6
1	NC_044998.1	12206220	0.387541	0.0569316
1	NC_044998.1	12216221	0.095263	0.05233
1	NC_044998.1	12226222	0.021348	0.096872
1	NC_044998.1	12236223	0.209352	0.00433318
1	NC_044998.1	12246224	0.130741	0.0553257
1	NC_044998.1	12256225	0.234988	0.741258
1	NC_044998.1	12266226	2.05524	0.00110066
1	NC_044998.1	12276227	0.142642	0.0980387
1	NC_044998.1	12286228	1.07496	0.0110328
1	NC_044998.1	12296229	1.78286	0.00213124
1	NC_044998.1	12306230	2.62241	0.00528171
1	NC_044998.1	12316231	0.033684	0.0126793
1	NC_044998.1	12326232	0.0809	0.151653
1	NC_044998.1	12336233	1.51824	0.0155816
1	NC_044998.1	12346234	1.06814	0.0431025
1	NC_044998.1	12356235	1.48339	0.0474963
1	NC_044998.1	12366236	0.637808	0.0406345
1	NC_044998.1	12376237	0.205323	0.0485907
1	NC_044998.1	12386238	0.530481	0.0403793
1	NC_044998.1	12396239	0.01655	0.761322
1	NC_044998.1	12406240	0.011858	0.371471
1	NC_044998.1	12416241	1.13562	0.0137418
1	NC_044998.1	12426242	0.9248	0.0130412
1	NC_044998.1	12436243	0.455698	0.0499043
1	NC_044998.1	12446244	1.24021	0.0284739
1	NC_044998.1	12456245	2.13555	0.00448457
1	NC_044998.1	12466246	0	0.8
1	NC_044998.1	12476247	0.069974	0.0761571
1	NC_044998.1	12486248	0.416345	0.0147364
1	NC_044998.1	12496249	0.798415	0.0252378
1	NC_044998.1	12506250	0.000355	0.59648
1	NC_044998.1	12516251	3.79181	0.00107635
1	NC_044998.1	12526252	0.467294	0.942756
1	NC_044998.1	12536253	0.026804	0.463464
1	NC_044998.1	12546254	2.73248	0.00726189
1	NC_044998.1	12556255	0.473449	0.0229772
1	NC_044998.1	12566256	0.256945	0.13462
1	NC_044998.1	12576257	0.202955	0.168761
1	NC_044998.1	12586258	0.306661	0.024123
1	NC_044998.1	12596259	0	1200
1	NC_044998.1	12606260	0.94204	0.338382
1	NC_044998.1	12616261	1.20206	0.0167624
1	NC_044998.1	12626262	6.08711	0.00635313
1	NC_044998.1	12636263	0.008498	0.213855
1	NC_044998.1	12646264	1.16107	0.0217804
1	NC_044998.1	12656265	0.285306	0.372227
1	NC_044998.1	12666266	0.01655	1.14198
1	NC_044998.1	12676267	0.012247	0.425285
1	NC_044998.1	12686268	0	1200
1	NC_044998.1	12696269	0.228105	0.0166292
1	NC_044998.1	12706270	0.150197	0.110851
1	NC_044998.1	12716271	0.241738	0.0249595
1	NC_044998.1	12726272	0.539197	0.0368513
1	NC_044998.1	12736273	0.381035	0.055903
1	NC_044998.1	12746274	1.70241	0.00489097
1	NC_044998.1	12756275	0.051554	0.0799368
1	NC_044998.1	12766276	0	0.705882
1	NC_044998.1	12776277	1.25634	0.02448
1	NC_044998.1	12786278	0.748164	0.00044809
1	NC_044998.1	12796279	0.953579	0.036562
1	NC_044998.1	12806280	0.835757	0.0427936
1	NC_044998.1	12816281	0.577828	0.0435307
1	NC_044998.1	12826282	1.70091	0.00776983
1	NC_044998.1	12836283	0.286185	0.499123
1	NC_044998.1	12846284	0.137728	0.0230773
1	NC_044998.1	12856285	0.010505	0.208947
1	NC_044998.1	12866286	0.126313	0.126504
1	NC_044998.1	12876287	0.033921	0.0974057
1	NC_044998.1	12886288	0.022804	0.078578
1	NC_044998.1	12896289	2.12291	0.00764723
1	NC_044998.1	12906290	0.880161	0.00260848
1	NC_044998.1	12916291	0.009306	0.423057
1	NC_044998.1	12926292	1.12622	0.0177333
1	NC_044998.1	12936293	0.234985	0.185317
1	NC_044998.1	12946294	0.027598	0.267952
1	NC_044998.1	12956295	0.011857	260.038
1	NC_044998.1	12966296	0.67063	0.0444483
1	NC_044998.1	12976297	0.188817	0.164574
1	NC_044998.1	12986298	1.18584	0.0184596
1	NC_044998.1	12996299	1e-06	0.304571
1	NC_044998.1	13006300	0.017623	0.205269
1	NC_044998.1	13016301	1.76733	0.00804751
1	NC_044998.1	13026302	0.087551	0.0567739
1	NC_044998.1	13036303	0.558639	0.015374
1	NC_044998.1	13046304	0.116024	0.0113333
1	NC_044998.1	13056305	0.424755	0.047039
1	NC_044998.1	13066306	0.522499	0.0129994
1	NC_044998.1	13076307	0.370535	0.0384802
1	NC_044998.1	13086308	2.65258	0.00477059
1	NC_044998.1	13096309	0.571101	0.0474352
1	NC_044998.1	13106310	4.3e-05	0.45401
1	NC_044998.1	13116311	0	0.521739
1	NC_044998.1	13126312	0.003929	0.141754
1	NC_044998.1	13136313	0	1.71429
1	NC_044998.1	13146314	2.46887	0.00164387
1	NC_044998.1	13156315	0.0001	0.265268
1	NC_044998.1	13166316	1.16249	0.00332322
1	NC_044998.1	13176317	2.40557	0.0109661
1	NC_044998.1	13186318	0.661934	0.00574133
1	NC_044998.1	13196319	0	2
1	NC_044998.1	13206320	0	0.461539
1	NC_044998.1	13216321	1.42656	0.0115727
1	NC_044998.1	13226322	1.05175	14.3521
1	NC_044998.1	13236323	4.11855	0.00446518
1	NC_044998.1	13246324	1.86054	0.0303394
1	NC_044998.1	13256325	1.7285	0.0018359
1	NC_044998.1	13266326	1.80552	0.00281381
1	NC_044998.1	13276327	0.500038	0.0497814
1	NC_044998.1	13286328	0.376938	0.116934
1	NC_044998.1	13296329	0	0.48
1	NC_044998.1	13306330	0	0.857143
1	NC_044998.1	13316331	0.624855	0.021103
1	NC_044998.1	13326332	0.066357	0.0548927
1	NC_044998.1	13336333	0.012247	1.48852
1	NC_044998.1	13346334	0.48022	0.299088
1	NC_044998.1	13356335	0.057817	0.316738
1	NC_044998.1	13366336	1.84174	0.00563921
1	NC_044998.1	13376337	0.78911	0.0695997
1	NC_044998.1	13386338	0.294826	0.0389128
1	NC_044998.1	13396339	1.51636	0.00992249
1	NC_044998.1	13406340	0	2.4
1	NC_044998.1	13416341	0.17299	0.0990637
1	NC_044998.1	13426342	0	1.2
1	NC_044998.1	13436343	1.90759	0.00841767
1	NC_044998.1	13446344	0.867095	0.0300078
1	NC_044998.1	13456345	0	6
1	NC_044998.1	13466346	0.129593	0.0666866
1	NC_044998.1	13476347	0.75259	0.00999509
1	NC_044998.1	13486348	7.09316	0.00077257
1	NC_044998.1	13496349	1.45496	0.00835399
1	NC_044998.1	13506350	0.287957	0.00784531
1	NC_044998.1	13516351	0.446912	0.0397366
1	NC_044998.1	13526352	0.050792	0.0803709
1	NC_044998.1	13536353	0.011857	1.30018
1	NC_044998.1	13546354	0.024284	0.36019
1	NC_044998.1	13556355	0	0.705882
1	NC_044998.1	13566356	4.13048	0.00367051
1	NC_044998.1	13576357	2.30374	0.00538064
1	NC_044998.1	13586358	0.017413	0.925769
1	NC_044998.1	13596359	0.413835	0.0279427
1	NC_044998.1	13606360	1.06398	0.0246873
1	NC_044998.1	13616361	1.87028	0.00417009
1	NC_044998.1	13626362	0.183323	0.0508682
1	NC_044998.1	13636363	0.020684	0.604866
1	NC_044998.1	13646364	0	1
1	NC_044998.1	13656365	4.58044	0.00105736
1	NC_044998.1	13666366	2.1145	0.00540357
1	NC_044998.1	13676367	0.109524	0.0443243
1	NC_044998.1	13686368	0.017408	0.925836
1	NC_044998.1	13696369	0.590432	0.0539672
1	NC_044998.1	13706370	0.178624	0.197515
1	NC_044998.1	13716371	0.892516	0.00818705
1	NC_044998.1	13726372	0.571264	0.0144283
1	NC_044998.1	13736373	0.395823	3.25202
1	NC_044998.1	13746374	0	1.2
1	NC_044998.1	13756375	0.008498	1.06928
1	NC_044998.1	13766376	0.290555	0.0319855
1	NC_044998.1	13776377	5e-05	1.11379
1	NC_044998.1	13786378	0	6
1	NC_044998.1	13796379	0.920472	0.133523
1	NC_044998.1	13806380	1.85879	0.024057
1	NC_044998.1	13816381	0	0.48
1	NC_044998.1	13826382	0.46538	0.00751637
1	NC_044998.1	13836383	0.753873	0.00537762
1	NC_044998.1	13846384	1.13932	0.00990388
1	NC_044998.1	13856385	0	4
1	NC_044998.1	13866386	0.313783	0.161142
1	NC_044998.1	13876387	0	12
1	NC_044998.1	13886388	0.00132	0.334251
1	NC_044998.1	13896389	0.011505	0.067824
1	NC_044998.1	13906390	0.435097	0.0232695
1	NC_044998.1	13916391	0.040474	0.0311821
1	NC_044998.1	13926392	0.380811	0.0132405
1	NC_044998.1	13936393	0.8889	0.0174129
1	NC_044998.1	13946394	0.031592	0.0167633
1	NC_044998.1	13956395	0.011993	0.432306
1	NC_044998.1	13966396	1.75358	0.00575133
1	NC_044998.1	13976397	0.122211	0.222925
1	NC_044998.1	13986398	0.263088	0.00862687
1	NC_044998.1	13996399	0.302959	0.0703668
1	NC_044998.1	14006400	0.249435	0.167508
1	NC_044998.1	14016401	0.380558	0.00978552
1	NC_044998.1	14026402	1.22485	0.0177972
1	NC_044998.1	14036403	0.012247	0.992371
1	NC_044998.1	14046404	0.338941	0.00885113
1	NC_044998.1	14056405	0.377019	0.0272086
1	NC_044998.1	14066406	0	1.2
1	NC_044998.1	14076407	0	0.428572
1	NC_044998.1	14086408	0.708978	0.020253
1	NC_044998.1	14096409	0.104609	0.0264537
1	NC_044998.1	14106410	1.77332	0.00559737
1	NC_044998.1	14116411	0.145151	0.120278
1	NC_044998.1	14126412	0.010842	0.153093
1	NC_044998.1	14136413	0.012247	0.496181
1	NC_044998.1	14146414	0.034308	0.146102
1	NC_044998.1	14156415	0.03469	0.0361446
1	NC_044998.1	14166416	0.060013	0.0541876
1	NC_044998.1	14176417	0	1200
1	NC_044998.1	14186418	0	2
1	NC_044998.1	14196419	0	0.444445
1	NC_044998.1	14206420	0.915349	0.0032476
1	NC_044998.1	14216421	0.141203	0.273034
1	NC_044998.1	14226422	0.016125	1.68529
1	NC_044998.1	14236423	0	0.857143
1	NC_044998.1	14246424	4.24208	0.00387845
1	NC_044998.1	14256425	1e-06	1.07832
1	NC_044998.1	14266426	0.017409	0.462915
1	NC_044998.1	14276427	0.756138	0.0129877
1	NC_044998.1	14286428	0	6
1	NC_044998.1	14296429	0.327242	0.011363
1	NC_044998.1	14306430	0.181507	0.0144924
1	NC_044998.1	14316431	0.934873	0.0147339
1	NC_044998.1	14326432	0	0.521739
1	NC_044998.1	14336433	0.939736	0.00152566
1	NC_044998.1	14346434	0.114759	0.0503111
1	NC_044998.1	14356435	0.01655	2.28397
1	NC_044998.1	14366436	0.012247	1.48852
1	NC_044998.1	14376437	0.054947	0.113056
1	NC_044998.1	14386438	0.012247	2.97711
1	NC_044998.1	14396439	1.697	0.0133875
1	NC_044998.1	14406440	0	0.6
1	NC_044998.1	14416441	1.20609	0.0366579
1	NC_044998.1	14426442	0.492712	0.0649534
1	NC_044998.1	14436443	1.19749	0.0300086
1	NC_044998.1	14446444	0.463317	0.00982178
1	NC_044998.1	14456445	0.010888	0.165432
1	NC_044998.1	14466446	0	1.5
1	NC_044998.1	14476447	0.012104	0.231954
1	NC_044998.1	14486448	0.013579	0.182042
1	NC_044998.1	14496449	0.133407	0.203564
1	NC_044998.1	14506450	0.13988	0.0948152
1	NC_044998.1	14516451	0.131817	1.09482
1	NC_044998.1	14526452	0	0.6
1	NC_044998.1	14536453	0.323516	0.0234744
1	NC_044998.1	14546454	0.235554	0.0651119
1	NC_044998.1	14556455	0	1.71429
1	NC_044998.1	14566456	1.21124	0.00746964
1	NC_044998.1	14576457	0.988571	0.00418691
1	NC_044998.1	14586458	0.487149	0.0181228
1	NC_044998.1	14596459	0.404068	0.00290471
1	NC_044998.1	14606460	0.008498	1.06928
1	NC_044998.1	14616461	0	0.266667
1	NC_044998.1	14626462	3.33741	0.00211312
1	NC_044998.1	14636463	1.05003	0.0576426
1	NC_044998.1	14646464	5.2779	0.00117065
1	NC_044998.1	14656465	0.42805	0.0286978
1	NC_044998.1	14666466	0.346868	0.0175252
1	NC_044998.1	14676467	0.755832	0.00895873
1	NC_044998.1	14686468	1.05391	0.0222148
1	NC_044998.1	14696469	0.105766	0.189478
1	NC_044998.1	14706470	0.131744	0.0282462
1	NC_044998.1	14716471	0	12
1	NC_044998.1	14726472	0	1.33333
1	NC_044998.1	14736473	0.061077	0.109999
1	NC_044998.1	14746474	1.82471	0.00918059
1	NC_044998.1	14756475	0.178968	0.197679
1	NC_044998.1	14766476	0.477542	0.0114458
1	NC_044998.1	14776477	0.080972	0.804374
1	NC_044998.1	14786478	2.40329	0.00342162
1	NC_044998.1	14796479	0.028355	0.490769
1	NC_044998.1	14806480	0.422036	0.019135
1	NC_044998.1	14816481	0.256174	0.0179884
1	NC_044998.1	14826482	1.52891	0.00388313
1	NC_044998.1	14836483	0.872808	0.071675
1	NC_044998.1	14846484	0.658802	0.0228004
1	NC_044998.1	14856485	0.502534	0.0108813
1	NC_044998.1	14866486	0.254177	0.0607339
1	NC_044998.1	14876487	0.017408	185.167
1	NC_044998.1	14886488	0.120185	0.153743
1	NC_044998.1	14896489	0.064673	0.0986511
1	NC_044998.1	14906490	0.405402	0.036315
1	NC_044998.1	14916491	0.161561	0.0170388
1	NC_044998.1	14926492	0.721201	0.00915411
1	NC_044998.1	14936493	0.234423	0.195601
1	NC_044998.1	14946494	1.06824	0.0448692
1	NC_044998.1	14956495	0	1.71429
1	NC_044998.1	14966496	1.19029	0.00343845
1	NC_044998.1	14976497	0.359617	0.013263
1	NC_044998.1	14986498	0.680166	0.219062
1	NC_044998.1	14996499	0.011857	0.520077
1	NC_044998.1	15006500	0	0.27907
1	NC_044998.1	15016501	1.67486	0.00544764
1	NC_044998.1	15026502	0.774267	0.00637558
1	NC_044998.1	15036503	0.149747	0.0267289
1	NC_044998.1	15046504	1.56093	0.00769744
1	NC_044998.1	15056505	0.242471	0.0323225
1	NC_044998.1	15066506	1.60417	0.0266965
1	NC_044998.1	15076507	6.54995	0.000850282
1	NC_044998.1	15086508	0	0.8
1	NC_044998.1	15096509	0.561429	0.0069476
1	NC_044998.1	15106510	0.334946	61.2106
1	NC_044998.1	15116511	1.12878	0.0186889
1	NC_044998.1	15126512	0	12
1	NC_044998.1	15136513	2.51191	0.00398909
1	NC_044998.1	15146514	0.016125	0.337059
1	NC_044998.1	15156515	0.192776	0.148822
1	NC_044998.1	15166516	0	4
1	NC_044998.1	15176517	0.751462	0.0127072
1	NC_044998.1	15186518	0.703136	0.00850995
1	NC_044998.1	15196519	0	0.428571
1	NC_044998.1	15206520	2.99964	0.0126661
1	NC_044998.1	15216521	0	0.292683
1	NC_044998.1	15226522	0.499172	0.0366305
1	NC_044998.1	15236523	0.023819	0.0317343
1	NC_044998.1	15246524	0	3
1	NC_044998.1	15256525	0.018051	0.127264
1	NC_044998.1	15266526	0	0.571429
1	NC_044998.1	15276527	0.18155	0.270237
1	NC_044998.1	15286528	0.005099	0.161903
1	NC_044998.1	15296529	0.790964	0.05868
1	NC_044998.1	15306530	0	2
1	NC_044998.1	15316531	1.36616	0.00514902
1	NC_044998.1	15326532	0.025379	0.079903
1	NC_044998.1	15336533	0.012247	0.330784
1	NC_044998.1	15346534	0	0.631579
1	NC_044998.1	15356535	0.637135	0.0145187
1	NC_044998.1	15366536	0.485736	0.0279166
1	NC_044998.1	15376537	0.041202	1.74627
1	NC_044998.1	15386538	0.016393	0.156001
1	NC_044998.1	15396539	0.089753	0.0820733
1	NC_044998.1	15406540	2.44004	0.00829981
1	NC_044998.1	15416541	4.88328	0.00233249
1	NC_044998.1	15426542	0.407772	0.0605834
1	NC_044998.1	15436543	0	2.4
1	NC_044998.1	15446544	0.53636	0.0553011
1	NC_044998.1	15456545	0.738271	0.0161956
1	NC_044998.1	15466546	0	0.521739
1	NC_044998.1	15476547	1.42372	0.0254854
1	NC_044998.1	15486548	0.072227	0.0417579
1	NC_044998.1	15496549	0.006159	0.0267638
1	NC_044998.1	15506550	1.29224	0.0239509
1	NC_044998.1	15516551	3.76912	0.00486424
1	NC_044998.1	15526552	0.722111	0.0188548
1	NC_044998.1	15536553	0.824047	0.0294029
1	NC_044998.1	15546554	0.016399	0.127336
1	NC_044998.1	15556555	0.042666	0.489293
1	NC_044998.1	15566556	0	6
1	NC_044998.1	15576557	0.387692	0.0137605
1	NC_044998.1	15586558	0.50831	0.265269
1	NC_044998.1	15596559	0.012817	0.640715
1	NC_044998.1	15606560	0.011857	2.60038
1	NC_044998.1	15616561	0.028458	0.172492
1	NC_044998.1	15626562	0.118927	0.0306172
1	NC_044998.1	15636563	0.011716	0.273941
1	NC_044998.1	15646564	0.294076	0.0208446
1	NC_044998.1	15656565	0.00816	0.0762985
1	NC_044998.1	15666566	0.015019	0.0702632
1	NC_044998.1	15676567	0.355065	0.0460897
1	NC_044998.1	15686568	0.011662	0.130558
1	NC_044998.1	15696569	0.029265	0.041427
1	NC_044998.1	15706570	0.590473	0.00567787
1	NC_044998.1	15716571	0.727946	0.0128301
1	NC_044998.1	15726572	0.444688	0.0404895
1	NC_044998.1	15736573	0.624738	0.0290828
1	NC_044998.1	15746574	0	12
1	NC_044998.1	15756575	0.078621	0.121914
1	NC_044998.1	15766576	5.6053	0.00138634
1	NC_044998.1	15776577	2.73	0.00683778
1	NC_044998.1	15786578	0.224339	0.0551204
1	NC_044998.1	15796579	2.49644	0.00441228
1	NC_044998.1	15806580	0.000149	0.329849
1	NC_044998.1	15816581	0.188696	0.0275119
1	NC_044998.1	15826582	0.257216	0.1394
1	NC_044998.1	15836583	0.076803	0.103045
1	NC_044998.1	15846584	0.008509	0.12576
1	NC_044998.1	15856585	0.011859	0.216687
1	NC_044998.1	15866586	0.856944	0.0150927
1	NC_044998.1	15876587	0.123438	0.032168
1	NC_044998.1	15886588	0.061457	0.0837906
1	NC_044998.1	15896589	0.860048	0.00418439
1	NC_044998.1	15906590	0.180259	0.172986
1	NC_044998.1	15916591	0.352288	0.0192874
1	NC_044998.1	15926592	0.554408	0.0498652
1	NC_044998.1	15936593	0.737656	0.00475429
1	NC_044998.1	15946594	0.590245	0.0169189
1	NC_044998.1	15956595	2.38729	0.00310374
1	NC_044998.1	15966596	0.081493	0.0178671
1	NC_044998.1	15976597	0.195049	0.11903
1	NC_044998.1	15986598	0.309373	0.018267
1	NC_044998.1	15996599	0.176108	0.128796
1	NC_044998.1	16006600	1.46422	0.00411814
1	NC_044998.1	16016601	0.986486	0.0420837
1	NC_044998.1	16026602	0.923463	7.74449
1	NC_044998.1	16036603	0.160447	0.529845
1	NC_044998.1	16046604	0.172414	0.0773868
1	NC_044998.1	16056605	0.732957	0.00856927
1	NC_044998.1	16066606	0.977975	0.00627601
1	NC_044998.1	16076607	0.015619	0.0218534
1	NC_044998.1	16086608	0.212737	0.029249
1	NC_044998.1	16096609	0.603753	0.398881
1	NC_044998.1	16106610	0.017408	1.85167
1	NC_044998.1	16116611	0.154188	0.0565897
1	NC_044998.1	16126612	0.221023	0.076579
1	NC_044998.1	16136613	0.028355	147.231
1	NC_044998.1	16146614	0	0.666667
1	NC_044998.1	16156615	0	1.71429
1	NC_044998.1	16166616	1.54058	0.00750231
1	NC_044998.1	16176617	0.46861	0.00540151
1	NC_044998.1	16186618	0.011885	0.371258
1	NC_044998.1	16196619	0.017408	0.617224
1	NC_044998.1	16206620	0.639206	0.0100281
1	NC_044998.1	16216621	0.007632	0.0229888
1	NC_044998.1	16226622	0.174673	0.0461753
1	NC_044998.1	16236623	1.93423	0.00291261
1	NC_044998.1	16246624	0.494313	0.0318479
1	NC_044998.1	16256625	0.281629	0.0668283
1	NC_044998.1	16266626	1.798	0.00507878
1	NC_044998.1	16276627	0.246963	0.148437
1	NC_044998.1	16286628	0.016392	0.312009
1	NC_044998.1	16296629	1.18873	0.0304004
1	NC_044998.1	16306630	0.016426	0.145113
1	NC_044998.1	16316631	0.612788	0.012275
1	NC_044998.1	16326632	0.008508	0.305439
1	NC_044998.1	16336633	0.00712	0.00681402
1	NC_044998.1	16346634	1.62569	0.000686299
1	NC_044998.1	16366636	0.019811	0.0018024
1	NC_044998.1	16376637	0.13575	0.36162
1	NC_044998.1	16386638	0.011874	0.152902
1	NC_044998.1	16396639	0.012254	0.248029
1	NC_044998.1	16406640	1.2278	0.0016963
1	NC_044998.1	16416641	0.359282	0.00513
1	NC_044998.1	16426642	0.574546	0.00292266
1	NC_044998.1	16436643	0	0.31579
1	NC_044998.1	16446644	0.052011	0.0369407
1	NC_044998.1	16456645	0.524897	0.0313069
1	NC_044998.1	16466646	0.124695	0.0437415
1	NC_044998.1	16476647	0.254833	0.0163773
1	NC_044998.1	16486648	0.634265	0.0115729
1	NC_044998.1	16496649	2e-06	0.540741
1	NC_044998.1	16506650	0.70191	0.012051
1	NC_044998.1	16516651	0.452603	0.0571709
1	NC_044998.1	16526652	0.475225	0.0187462
1	NC_044998.1	16536653	0.645557	0.0192955
1	NC_044998.1	16546654	0.018537	0.0960261
1	NC_044998.1	16556655	0.011855	0.371516
1	NC_044998.1	16566656	0.017408	0.370334
1	NC_044998.1	16576657	0.371808	0.0556008
1	NC_044998.1	16586658	0.099847	0.0856067
1	NC_044998.1	16596659	0.381071	0.006311
1	NC_044998.1	16606660	0.643028	0.0517099
1	NC_044998.1	16616661	1.67056	0.00381407
1	NC_044998.1	16626662	0.003327	0.214082
1	NC_044998.1	16636663	0.012247	2.97711
1	NC_044998.1	16646664	0	0.48
1	NC_044998.1	16656665	1.77001	0.00754275
1	NC_044998.1	16666666	2.45279	0.00712501
1	NC_044998.1	16676667	1.55193	0.00533938
1	NC_044998.1	16686668	0	0.521739
1	NC_044998.1	16696669	0.012365	0.371048
1	NC_044998.1	16706670	0.015987	0.0972677
1	NC_044998.1	16716671	0	3
1	NC_044998.1	16726672	0.058832	0.059613
1	NC_044998.1	16736673	2.36578	0.00107368
1	NC_044998.1	16746674	0.269269	0.0213264
1	NC_044998.1	16756675	0.546638	0.0265519
1	NC_044998.1	16766676	1.55639	0.00554638
1	NC_044998.1	16776677	0.020487	0.344
1	NC_044998.1	16786678	1.11459	0.0118068
1	NC_044998.1	16796679	2.39606	0.00333362
1	NC_044998.1	16806680	0.012247	0.992344
1	NC_044998.1	16816681	0.011857	1.30019
1	NC_044998.1	16826682	1.10949	0.0121642
1	NC_044998.1	16836683	0.488089	0.00498823
1	NC_044998.1	16846684	3.57052	0.00574295
1	NC_044998.1	16856685	3.15564	0.00178964
1	NC_044998.1	16866686	0.509339	0.0613452
1	NC_044998.1	16876687	0.021701	0.308886
1	NC_044998.1	16886688	0.491086	0.0475955
1	NC_044998.1	16896689	0.019618	0.248172
1	NC_044998.1	16906690	1.82846	0.00904945
1	NC_044998.1	16916691	0.11771	0.0158103
1	NC_044998.1	16926692	0.70639	0.00575088
1	NC_044998.1	16936693	0.304622	0.00167652
1	NC_044998.1	16946694	0.006434	0.665694
1	NC_044998.1	16956695	0.028354	0.245386
1	NC_044998.1	16966696	0.037426	0.067613
1	NC_044998.1	16976697	0	0.666667
1	NC_044998.1	16986698	0.020613	0.273668
1	NC_044998.1	16996699	0.028355	1.47231
1	NC_044998.1	17006700	0.080699	0.108101
1	NC_044998.1	17016701	0	0.137931
1	NC_044998.1	17026702	0.848998	0.0235837
1	NC_044998.1	17036703	0	1.33333
1	NC_044998.1	17046704	0.123678	0.0852637
1	NC_044998.1	17056705	0.56942	0.0382992
1	NC_044998.1	17066706	5.92379	0.00235903
1	NC_044998.1	17076707	0.312834	0.0285628
1	NC_044998.1	17086708	0.116353	0.168541
1	NC_044998.1	17096709	0.075811	0.103999
1	NC_044998.1	17106710	0	1
1	NC_044998.1	17116711	0.078257	0.233499
1	NC_044998.1	17126712	0.015648	1.72626
1	NC_044998.1	17136713	1.33935	0.00853263
1	NC_044998.1	17146714	1.12278	0.0205272
1	NC_044998.1	17156715	0.620622	0.0180438
1	NC_044998.1	17166716	0.286195	0.998187
1	NC_044998.1	17176717	3.00147	0.00733489
1	NC_044998.1	17186718	0.844585	0.0113589
1	NC_044998.1	17196719	0.332496	0.0169451
1	NC_044998.1	17206720	3.02597	0.00337781
1	NC_044998.1	17216721	0	1.33333
1	NC_044998.1	17226722	0.594749	0.0258177
1	NC_044998.1	17236723	0.080934	0.098389
1	NC_044998.1	17246724	1.24588	0.00980685
1	NC_044998.1	17256725	0.410224	0.0337046
1	NC_044998.1	17266726	0.271401	0.0262349
1	NC_044998.1	17276727	0	6
1	NC_044998.1	17286728	6.04272	0.00078225
1	NC_044998.1	17296729	0.027972	0.0668274
1	NC_044998.1	17306730	0.158932	0.120792
1	NC_044998.1	17316731	1.65398	0.00353567
1	NC_044998.1	17326732	3.43929	0.00268362
1	NC_044998.1	17336733	1.24963	0.0183533
1	NC_044998.1	17346734	0	2
1	NC_044998.1	17356735	0	12
1	NC_044998.1	17366736	0	0.545455
1	NC_044998.1	17376737	0.024493	0.29446
1	NC_044998.1	17386738	1.31598	0.00249024
1	NC_044998.1	17396739	0.378407	0.0187776
1	NC_044998.1	17406740	0	0.0456274
1	NC_044998.1	17416741	0	0.00693642
1	NC_044998.1	17426742	0	0.048
1	NC_044998.1	17436743	0.141392	0.000615875
1	NC_044998.1	17446744	2.06536	0.00245955
1	NC_044998.1	17456745	0.021701	0.143419
1	NC_044998.1	17466746	0.032464	0.0900853
1	NC_044998.1	17476747	0.046299	0.236175
1	NC_044998.1	17486748	0	6
1	NC_044998.1	17496749	0.439736	2.00394
1	NC_044998.1	17506750	0.55659	0.0494825
1	NC_044998.1	17516751	0.211525	0.88014
1	NC_044998.1	17526752	2.64917	0.000919834
1	NC_044998.1	17536753	2.31573	0.00934532
1	NC_044998.1	17546754	1.42921	0.010527
1	NC_044998.1	17556755	0.012247	1.48856
1	NC_044998.1	17566756	1.24623	0.00944926
1	NC_044998.1	17576757	0.247007	0.0249616
1	NC_044998.1	17586758	6.47744	0.00145865
1	NC_044998.1	17596759	0.23891	0.735967
1	NC_044998.1	17606760	0.321609	0.0332316
1	NC_044998.1	17616761	0.184953	0.0805665
1	NC_044998.1	17626762	0.022749	0.240087
1	NC_044998.1	17636763	0	0.8
1	NC_044998.1	17646764	1.29827	0.0353392
1	NC_044998.1	17656765	0	3
1	NC_044998.1	17666766	0.464701	0.503716
1	NC_044998.1	17676767	0.277562	0.0360325
1	NC_044998.1	17686768	2.3048	0.00383937
1	NC_044998.1	17696769	0.012016	1.49533
1	NC_044998.1	17706770	0.291508	0.024838
1	NC_044998.1	17716771	0	6
1	NC_044998.1	17726772	0	12
1	NC_044998.1	17736773	0.27954	0.13515
1	NC_044998.1	17746774	1.15358	0.0102905
1	NC_044998.1	17756775	0	3
1	NC_044998.1	17766776	0.567333	0.0727552
1	NC_044998.1	17776777	0.221725	0.133684
1	NC_044998.1	17786778	0.008554	0.267008
1	NC_044998.1	17796779	0.180414	0.0109223
1	NC_044998.1	17806780	0.037705	0.32256
1	NC_044998.1	17816781	1.13327	0.007356
1	NC_044998.1	17826782	0	2.4
1	NC_044998.1	17836783	1.06855	0.0154921
1	NC_044998.1	17846784	4.66687	0.00147854
1	NC_044998.1	17856785	2.75671	0.00581641
1	NC_044998.1	17866786	1.39799	0.0167327
1	NC_044998.1	17876787	1.08748	0.0110609
1	NC_044998.1	17886788	1.06534	0.0432537
1	NC_044998.1	17896789	0	0.857143
1	NC_044998.1	17906790	3.60508	0.00736402
1	NC_044998.1	17916791	0.918266	0.0227033
1	NC_044998.1	17926792	0.621372	0.114224
1	NC_044998.1	17936793	0.181417	0.540676
1	NC_044998.1	17946794	0	0.857143
1	NC_044998.1	17956795	1.04635	0.0376836
1	NC_044998.1	17966796	0.892326	0.0156129
1	NC_044998.1	17976797	2.99179	0.00457455
1	NC_044998.1	17986798	0	1.33333
1	NC_044998.1	17996799	0	1.2
1	NC_044998.1	18006800	1.10862	0.00856528
1	NC_044998.1	18016801	0.463161	0.559039
1	NC_044998.1	18026802	1.38602	0.00718773
1	NC_044998.1	18036803	0.048489	0.087339
1	NC_044998.1	18046804	1.12109	0.0173656
1	NC_044998.1	18056805	0.008498	0.427719
1	NC_044998.1	18066806	0	1
1	NC_044998.1	18076807	6.63496	0.00481636
1	NC_044998.1	18086808	0	0.428572
1	NC_044998.1	18096809	0	6
1	NC_044998.1	18106810	0.793682	0.00714938
1	NC_044998.1	18116811	0.74072	0.00545096
1	NC_044998.1	18126812	0.801923	0.0181981
1	NC_044998.1	18136813	0	3
1	NC_044998.1	18146814	1.50288	0.00146203
1	NC_044998.1	18156815	1.42922	0.00181026
1	NC_044998.1	18166816	0.474477	0.0278237
1	NC_044998.1	18176817	0.407213	0.0595696
1	NC_044998.1	18186818	0.397824	0.0676805
1	NC_044998.1	18196819	3.11177	0.00306679
1	NC_044998.1	18206820	0.714742	0.021838
1	NC_044998.1	18216821	0.025124	0.018021
1	NC_044998.1	18226822	0.017437	1.85096
1	NC_044998.1	18236823	0.072105	0.110744
1	NC_044998.1	18246824	0.261295	0.0229835
1	NC_044998.1	18256825	0.711259	0.0035863
1	NC_044998.1	18266826	0.161384	0.0787516
1	NC_044998.1	18276827	0	1200
1	NC_044998.1	18286828	0.610197	0.137201
1	NC_044998.1	18296829	0.012233	0.234945
1	NC_044998.1	18306830	0.213328	0.0999384
1	NC_044998.1	18316831	0.30462	0.171886
1	NC_044998.1	18326832	0.906302	0.0118982
1	NC_044998.1	18336833	0.305725	0.0774042
1	NC_044998.1	18346834	0.432647	0.0522496
1	NC_044998.1	18356835	1.25063	0.0391847
1	NC_044998.1	18366836	0	0.6
1	NC_044998.1	18376837	1.1159	0.00815649
1	NC_044998.1	18386838	0.697189	0.00693115
1	NC_044998.1	18396839	1.50713	0.00454023
1	NC_044998.1	18406840	1.32082	0.00624641
1	NC_044998.1	18416841	0	3
1	NC_044998.1	18426842	0	4
1	NC_044998.1	18436843	2.08113	0.00721999
1	NC_044998.1	18446844	0.032465	0.630557
1	NC_044998.1	18456845	1.08614	0.0185328
1	NC_044998.1	18466846	0	0.666667
1	NC_044998.1	18476847	0.478894	0.480865
1	NC_044998.1	18486848	0.100072	0.0118434
1	NC_044998.1	18496849	1.23707	0.00574526
1	NC_044998.1	18506850	0.23719	0.860689
1	NC_044998.1	18516851	0.005426	0.296083
1	NC_044998.1	18526852	0.383685	0.119576
1	NC_044998.1	18536853	1.54235	0.00823975
1	NC_044998.1	18546854	0.972804	0.00664409
1	NC_044998.1	18556855	0.021312	0.00105689
1	NC_044998.1	18566856	3.55415	0.000402386
1	NC_044998.1	18576857	0.42554	0.0153612
1	NC_044998.1	18586858	0.09397	0.0102005
1	NC_044998.1	18596859	0.099411	0.411779
1	NC_044998.1	18606860	0.041309	0.467203
1	NC_044998.1	18616861	0.633902	0.0497614
1	NC_044998.1	18626862	0.679638	0.0220497
1	NC_044998.1	18636863	0.068969	0.00756766
1	NC_044998.1	18646864	0	4
1	NC_044998.1	18656865	1.37122	0.00705251
1	NC_044998.1	18666866	0.34567	0.631299
1	NC_044998.1	18676867	0.018451	0.00637137
1	NC_044998.1	18686868	0.006262	0.238931
1	NC_044998.1	18696869	0.099464	0.569779
1	NC_044998.1	18706870	0.428039	0.00872009
1	NC_044998.1	18716871	0.256082	0.0165022
1	NC_044998.1	18726872	0	0.666667
1	NC_044998.1	18736873	0.017975	0.0615729
1	NC_044998.1	18746874	0.739016	0.0270243
1	NC_044998.1	18756875	4.10703	0.00154676
1	NC_044998.1	18766876	0.744155	0.0603556
1	NC_044998.1	18776877	0.193862	0.0223648
1	NC_044998.1	18786878	0.048601	0.121481
1	NC_044998.1	18796879	0.59024	0.00681676
1	NC_044998.1	18806880	0.049207	0.134417
1	NC_044998.1	18816881	1.35716	0.0157101
1	NC_044998.1	18826882	0.01534	0.228373
1	NC_044998.1	18836883	1.45891	0.00979548
1	NC_044998.1	18846884	15.0901	0.000422509
1	NC_044998.1	18856885	0.387979	0.0203441
1	NC_044998.1	18866886	9.24388	8.8276e-05
1	NC_044998.1	18876887	0.0636	0.086811
1	NC_044998.1	18886888	0.070111	0.0242688
1	NC_044998.1	18896889	15.5793	0.000134274
1	NC_044998.1	18906890	110.691	2.14753e-05
1	NC_044998.1	18916891	133.34	1.74877e-05
1	NC_044998.1	18926892	2.72458	0.00341271
1	NC_044998.1	18936893	2.55564	0.00456579
1	NC_044998.1	18946894	110.341	1.07001e-05
1	NC_044998.1	18956895	119.478	1.03932e-05
1	NC_044998.1	18966896	2.28142	0.00454638
1	NC_044998.1	18976897	168.778	8.47085e-06
1	NC_044998.1	18986898	68.29	7.79116e-06
1	NC_044998.1	18996899	138.232	7.23804e-06
1	NC_044998.1	19006900	135.54	6.85526e-06
1	NC_044998.1	19016901	134.664	6.73847e-06
1	NC_044998.1	19026902	101.673	7.09009e-06
1	NC_044998.1	19036903	11.3743	0.000240078
1	NC_044998.1	19046904	0	0.0502092
1	NC_044998.1	19056905	0.275225	0.170545
1	NC_044998.1	19066906	0.299167	0.00037538
1	NC_044998.1	19076907	0.01735	0.605808
1	NC_044998.1	19086908	0.028355	147.231
1	NC_044998.1	19096909	40.7558	0.000161234
1	NC_044998.1	19106910	9.49901	6.59592e-05
1	NC_044998.1	19116911	131.956	1.47918e-05
1	NC_044998.1	19126912	155.255	1.13384e-05
1	NC_044998.1	19136913	230.184	1.11384e-05
1	NC_044998.1	19146914	189.15	1.20858e-05
1	NC_044998.1	19156915	254.188	1.1717e-05
1	NC_044998.1	19166916	238.801	1.22221e-05
1	NC_044998.1	19176917	157.498	1.46663e-05
1	NC_044998.1	19186918	55.9085	1.94706e-05
1	NC_044998.1	19196919	61.7951	2.33898e-05
1	NC_044998.1	19206920	53.9336	3.21816e-05
1	NC_044998.1	19216921	21.6788	3.87799e-05
1	NC_044998.1	19226922	0.029637	0.087443
1	NC_044998.1	19236923	33.1313	8.37198e-05
1	NC_044998.1	19246924	1.75787	0.00198683
1	NC_044998.1	19256925	0	0.00419727
1	NC_044998.1	19266926	0.0055	0.00362062
1	NC_044998.1	19276927	0.121741	0.0012187
1	NC_044998.1	19286928	0.042885	0.000254388
1	NC_044998.1	19306930	24.2216	8.31126e-05
1	NC_044998.1	19316931	7.81364	0.000162803
1	NC_044998.1	19326932	0.055843	0.00301424
1	NC_044998.1	19336933	0.40966	0.000574031
1	NC_044998.1	19346934	221.217	1.96627e-06
1	NC_044998.1	19356935	350.752	1.88599e-06
1	NC_044998.1	19366936	367.389	1.84676e-06
1	NC_044998.1	19376937	376.724	1.83891e-06
1	NC_044998.1	19386938	229.636	1.85739e-06
1	NC_044998.1	19396939	209.433	1.86052e-06
1	NC_044998.1	19406940	9.28695	0.000978357
1	NC_044998.1	19416941	144.756	1.85245e-06
1	NC_044998.1	19426942	278.685	1.81256e-06
1	NC_044998.1	19436943	440.525	1.77609e-06
1	NC_044998.1	19446944	612.32	1.75763e-06
1	NC_044998.1	19456945	563.563	1.74613e-06
1	NC_044998.1	19466946	731.424	1.73045e-06
1	NC_044998.1	19476947	812.616	1.71627e-06
1	NC_044998.1	19486948	762.55	1.70604e-06
1	NC_044998.1	19496949	755.887	1.69621e-06
1	NC_044998.1	19506950	902.618	1.68342e-06
1	NC_044998.1	19516951	1052.04	1.67233e-06
1	NC_044998.1	19526952	1097.51	1.66833e-06
1	NC_044998.1	19536953	1114.76	1.66922e-06
1	NC_044998.1	19546954	1005.94	1.6777e-06
1	NC_044998.1	19556955	936.499	1.69032e-06
1	NC_044998.1	19566956	842.416	1.70959e-06
1	NC_044998.1	19576957	688.857	1.7346e-06
1	NC_044998.1	19586958	0	12
1	NC_044998.1	19596959	762.887	1.71734e-06
1	NC_044998.1	19606960	1030.28	1.67544e-06
1	NC_044998.1	19616961	1237.87	1.64317e-06
1	NC_044998.1	19626962	1292.84	1.62145e-06
1	NC_044998.1	19636963	1411.2	1.60673e-06
1	NC_044998.1	19646964	1511.21	1.59532e-06
1	NC_044998.1	19656965	1459.31	1.59661e-06
1	NC_044998.1	19666966	1354.81	1.60445e-06
1	NC_044998.1	19676967	1346.42	1.61187e-06
1	NC_044998.1	19686968	1340.9	1.61548e-06
1	NC_044998.1	19696969	1362.6	1.61738e-06
1	NC_044998.1	19706970	1348.7	1.62008e-06
1	NC_044998.1	19716971	1299.73	1.6257e-06
1	NC_044998.1	19726972	1218.44	1.63265e-06
1	NC_044998.1	19736973	1246.79	1.63691e-06
1	NC_044998.1	19746974	1237.95	1.64415e-06
1	NC_044998.1	19756975	954.931	1.65529e-06
1	NC_044998.1	19766976	1114.16	1.65858e-06
1	NC_044998.1	19776977	1183.8	1.65606e-06
1	NC_044998.1	19786978	1258.79	1.66429e-06
1	NC_044998.1	19796979	984.941	1.68533e-06
1	NC_044998.1	19806980	1043.23	1.69292e-06
1	NC_044998.1	19816981	1134.62	1.71348e-06
1	NC_044998.1	19826982	1174.1	1.74128e-06
1	NC_044998.1	19836983	1123.56	1.77309e-06
1	NC_044998.1	19846984	1211.52	1.7976e-06
1	NC_044998.1	19856985	1041.6	1.84992e-06
1	NC_044998.1	19866986	850.436	1.90496e-06
1	NC_044998.1	19876987	544.255	1.95797e-06
1	NC_044998.1	19886988	833.336	1.99926e-06
1	NC_044998.1	19896989	710.247	2.06308e-06
1	NC_044998.1	19906990	574.666	2.11875e-06
1	NC_044998.1	19916991	596.422	2.14571e-06
1	NC_044998.1	19926992	754.465	2.16826e-06
1	NC_044998.1	19936993	419.809	2.30471e-06
1	NC_044998.1	19946994	257.729	2.4848e-06
1	NC_044998.1	19956995	0	6
1	NC_044998.1	19966996	0.090158	0.150998
1	NC_044998.1	19976997	53.2185	2.93469e-06
1	NC_044998.1	19986998	107.763	3.04947e-06
1	NC_044998.1	19996999	89.3786	3.1472e-06
1	NC_044998.1	20007000	281.372	3.24361e-06
1	NC_044998.1	20017001	3.73194	0.00334898
1	NC_044998.1	20027002	513.08	3.39185e-06
[truncated: 99,340 more rows]
