# Supplementary material for: To Tame a Songbird: The Genomics of the Domestication Syndrome in a Songbird Model Species
Source: Research Square preprint supplement (doi:10.21203/rs.3.rs-4921127/v1), 2025-04-11
Supplement: Supplementary file 3 [file ae833443404dabb2872f710d.xlsx]

## Sheet: WinFst
(indexStart,indexStop)(firstPos_withData,lastPos_withData)(WinStart,WinStop)	RefSeq	midPos	nSites	Fst
(575,1712)(11483,16445)(10001,20001)	NC_044998.1	15001	1139	0.006096
(1713,10358)(21209,30001)(20002,30002)	NC_044998.1	25002	8647	0.118396
(10360,19807)(30003,40002)(30003,40003)	NC_044998.1	35003	9449	0.180568
(19809,29642)(40004,50003)(40004,50004)	NC_044998.1	45004	9835	0.14636
(29644,39584)(50005,60004)(50005,60005)	NC_044998.1	55005	9942	0.137484
(39586,49519)(60006,70005)(60006,70006)	NC_044998.1	65006	9935	0.259131
(49521,59378)(70007,80006)(70007,80007)	NC_044998.1	75007	9859	0.111557
(59380,69176)(80008,90007)(80008,90008)	NC_044998.1	85008	9798	0.115792
(69178,79064)(90009,100008)(90009,100009)	NC_044998.1	95009	9888	0.302995
(79066,88815)(100010,110009)(100010,110010)	NC_044998.1	105010	9751	0.216039
(88817,98685)(110011,120010)(110011,120011)	NC_044998.1	115011	9870	0.253968
(98687,107290)(120012,130011)(120012,130012)	NC_044998.1	125012	8605	0.251393
(107292,117137)(130013,140012)(130013,140013)	NC_044998.1	135013	9847	0.200938
(117139,127021)(140014,150013)(140014,150014)	NC_044998.1	145014	9884	0.240528
(127023,135524)(150015,160014)(150015,160015)	NC_044998.1	155015	8503	0.188767
(135526,145418)(160016,170015)(160016,170016)	NC_044998.1	165016	9894	0.194006
(145420,155264)(170017,180016)(170017,180017)	NC_044998.1	175017	9846	0.181583
(155266,165150)(180018,190017)(180018,190018)	NC_044998.1	185018	9886	0.211888
(165152,174749)(190019,200018)(190019,200019)	NC_044998.1	195019	9599	0.256117
(174751,184548)(200020,210019)(200020,210020)	NC_044998.1	205020	9799	0.23035
(184550,194411)(210021,220020)(210021,220021)	NC_044998.1	215021	9863	0.290927
(194413,203805)(220022,230021)(220022,230022)	NC_044998.1	225022	9394	0.155215
(203807,213252)(230023,240022)(230023,240023)	NC_044998.1	235023	9447	0.222057
(213254,223112)(240024,250023)(240024,250024)	NC_044998.1	245024	9860	0.247892
(223114,232946)(250025,260024)(250025,260025)	NC_044998.1	255025	9834	0.260225
(232948,241796)(260026,270025)(260026,270026)	NC_044998.1	265026	8850	0.163755
(241798,251708)(270027,280026)(270027,280027)	NC_044998.1	275027	9912	0.23094
(251710,261386)(280028,290027)(280028,290028)	NC_044998.1	285028	9678	0.214152
(261388,271032)(290029,300028)(290029,300029)	NC_044998.1	295029	9646	0.147097
(271034,280836)(300030,310029)(300030,310030)	NC_044998.1	305030	9804	0.195835
(280838,290728)(310031,320030)(310031,320031)	NC_044998.1	315031	9892	0.210545
(290730,300604)(320032,330031)(320032,330032)	NC_044998.1	325032	9876	0.215329
(300606,308186)(330033,340032)(330033,340033)	NC_044998.1	335033	7582	0.116519
(308188,317904)(340034,350033)(340034,350034)	NC_044998.1	345034	9718	0.229998
(317906,327415)(350035,359761)(350035,360035)	NC_044998.1	355035	9511	0.284668
(327416,336680)(360283,370032)(360036,370036)	NC_044998.1	365036	9266	0.201169
(336681,346543)(370037,380036)(370037,380037)	NC_044998.1	375037	9864	0.250931
(346545,354908)(380038,390037)(380038,390038)	NC_044998.1	385038	8365	0.177921
(354910,362605)(390039,400038)(390039,400039)	NC_044998.1	395039	7697	0.147987
(362607,371876)(400040,410039)(400040,410040)	NC_044998.1	405040	9271	0.196305
(371878,380951)(410041,420040)(410041,420041)	NC_044998.1	415041	9075	0.136502
(380953,389133)(420042,430023)(420042,430042)	NC_044998.1	425042	8182	0.211225
(389134,397910)(430049,440042)(430043,440043)	NC_044998.1	435043	8778	0.22214
(397912,407802)(440044,450043)(440044,450044)	NC_044998.1	445044	9892	0.250547
(407804,417039)(450045,460044)(450045,460045)	NC_044998.1	455045	9237	0.235338
(417041,426416)(460046,470045)(460046,470046)	NC_044998.1	465046	9377	0.31236
(426418,436240)(470047,480046)(470047,480047)	NC_044998.1	475047	9824	0.305172
(436242,442930)(480048,490047)(480048,490048)	NC_044998.1	485048	6690	0.300007
(442932,452796)(490049,500048)(490049,500049)	NC_044998.1	495049	9866	0.212414
(452798,462607)(500050,510049)(500050,510050)	NC_044998.1	505050	9811	0.28715
(462609,466073)(510051,513553)(510051,520051)	NC_044998.1	515051	3466	0.265696
(466074,472280)(523782,530051)(520052,530052)	NC_044998.1	525052	6208	0.219978
(472282,477895)(530053,540052)(530053,540053)	NC_044998.1	535053	5615	0.198021
(477897,487632)(540054,550053)(540054,550054)	NC_044998.1	545054	9737	0.225521
(487634,497183)(550055,560054)(550055,560055)	NC_044998.1	555055	9551	0.260465
(497185,507006)(560056,570055)(560056,570056)	NC_044998.1	565056	9823	0.226528
(507008,516792)(570057,580056)(570057,580057)	NC_044998.1	575057	9786	0.23653
(516794,524934)(580058,589451)(580058,590058)	NC_044998.1	585058	8142	0.261439
(524935,532586)(591640,600058)(590059,600059)	NC_044998.1	595059	7653	0.471977
(532588,541103)(600060,610059)(600060,610060)	NC_044998.1	605060	8517	0.27569
(541105,550749)(610061,620060)(610061,620061)	NC_044998.1	615061	9646	0.385564
(550751,559840)(620062,630061)(620062,630062)	NC_044998.1	625062	9091	0.171711
(559842,569133)(630063,640062)(630063,640063)	NC_044998.1	635063	9293	0.255947
(569135,578883)(640064,650063)(640064,650064)	NC_044998.1	645064	9750	0.224517
(578885,586902)(650065,659317)(650065,660065)	NC_044998.1	655065	8019	0.294063
(586903,595466)(660375,670065)(660066,670066)	NC_044998.1	665066	8565	0.23667
(595468,605272)(670067,680066)(670067,680067)	NC_044998.1	675067	9806	0.235891
(605274,614500)(680068,689547)(680068,690068)	NC_044998.1	685068	9228	0.233388
(614501,622691)(690344,699997)(690069,700069)	NC_044998.1	695069	8192	0.20086
(622692,631854)(700524,710069)(700070,710070)	NC_044998.1	705070	9164	0.247616
(631856,640516)(710071,720070)(710071,720071)	NC_044998.1	715071	8662	0.191434
(640518,650212)(720072,730071)(720072,730072)	NC_044998.1	725072	9696	0.190818
(650214,659016)(730073,740072)(730073,740073)	NC_044998.1	735073	8804	0.149611
(659018,668820)(740074,750073)(740074,750074)	NC_044998.1	745074	9804	0.157249
(668822,676887)(750075,760074)(750075,760075)	NC_044998.1	755075	8067	0.194225
(676889,686558)(760076,770075)(760076,770076)	NC_044998.1	765076	9671	0.156016
(686560,695533)(770077,780034)(770077,780077)	NC_044998.1	775077	8975	0.188475
(695534,704849)(780100,789844)(780078,790078)	NC_044998.1	785078	9317	0.136761
(704850,713904)(790504,800078)(790079,800079)	NC_044998.1	795079	9056	0.168133
(713906,723553)(800080,810079)(800080,810080)	NC_044998.1	805080	9649	0.136046
(723555,733085)(810081,820080)(810081,820081)	NC_044998.1	815081	9532	0.16216
(733087,741992)(820082,830081)(820082,830082)	NC_044998.1	825082	8907	0.150543
(741994,750842)(830083,840082)(830083,840083)	NC_044998.1	835083	8850	0.139875
(750844,760525)(840084,850083)(840084,850084)	NC_044998.1	845084	9683	0.12137
(760527,769591)(850085,860084)(850085,860085)	NC_044998.1	855085	9066	0.116927
(769593,777267)(860086,870085)(860086,870086)	NC_044998.1	865086	7676	0.127211
(777269,786766)(870087,880086)(870087,880087)	NC_044998.1	875087	9499	0.156076
(786767,794829)(880106,890087)(880088,890088)	NC_044998.1	885088	8064	0.129833
(794831,804269)(890089,900088)(890089,900089)	NC_044998.1	895089	9440	0.181516
(804271,813944)(900090,910089)(900090,910090)	NC_044998.1	905090	9675	0.086341
(813946,822986)(910091,920090)(910091,920091)	NC_044998.1	915091	9042	0.165315
(822988,832856)(920092,930091)(920092,930092)	NC_044998.1	925092	9870	0.180987
(832858,841855)(930093,940092)(930093,940093)	NC_044998.1	935093	8999	0.198056
(841857,851747)(940094,950093)(940094,950094)	NC_044998.1	945094	9892	0.210261
(851749,861478)(950095,960094)(950095,960095)	NC_044998.1	955095	9731	0.179696
(861480,871141)(960096,970093)(960096,970096)	NC_044998.1	965096	9663	0.126828
(871142,880870)(970098,980096)(970097,980097)	NC_044998.1	975097	9730	0.135859
(880872,890498)(980098,990097)(980098,990098)	NC_044998.1	985098	9628	0.172356
(890500,900231)(990099,1000098)(990099,1000099)	NC_044998.1	995099	9733	0.171011
(900233,910073)(1000100,1010099)(1000100,1010100)	NC_044998.1	1005100	9842	0.243277
(910075,918829)(1010101,1020100)(1010101,1020101)	NC_044998.1	1015101	8756	0.134497
(918831,927383)(1020102,1030101)(1020102,1030102)	NC_044998.1	1025102	8554	0.132465
(927385,935761)(1030103,1040102)(1030103,1040103)	NC_044998.1	1035103	8378	0.173708
(935763,944645)(1040104,1050103)(1040104,1050104)	NC_044998.1	1045104	8884	0.191036
(944647,954170)(1050105,1060103)(1050105,1060105)	NC_044998.1	1055105	9525	0.162662
(954171,963172)(1060118,1070105)(1060106,1070106)	NC_044998.1	1065106	9003	0.289988
(963174,972669)(1070107,1080106)(1070107,1080107)	NC_044998.1	1075107	9497	0.219084
(972671,981896)(1080108,1090107)(1080108,1090108)	NC_044998.1	1085108	9227	0.258048
(981898,989607)(1090109,1100108)(1090109,1100109)	NC_044998.1	1095109	7711	0.168382
(989609,999328)(1100110,1110109)(1100110,1110110)	NC_044998.1	1105110	9721	0.198571
(999330,1008503)(1110111,1120110)(1110111,1120111)	NC_044998.1	1115111	9175	0.182224
(1008505,1017730)(1120112,1130111)(1120112,1130112)	NC_044998.1	1125112	9227	0.245337
(1017732,1027616)(1130113,1140112)(1130113,1140113)	NC_044998.1	1135113	9886	0.217301
(1027618,1037231)(1140114,1150113)(1140114,1150114)	NC_044998.1	1145114	9615	0.272371
(1037233,1047056)(1150115,1160114)(1150115,1160115)	NC_044998.1	1155115	9825	0.231055
(1047058,1056258)(1160116,1170115)(1160116,1170116)	NC_044998.1	1165116	9202	0.197084
(1056260,1064919)(1170117,1180116)(1170117,1180117)	NC_044998.1	1175117	8661	0.20811
(1064921,1073679)(1180118,1190117)(1180118,1190118)	NC_044998.1	1185118	8760	0.407258
(1073681,1083245)(1190119,1200118)(1190119,1200119)	NC_044998.1	1195119	9566	0.254207
(1083247,1092478)(1200120,1210115)(1200120,1210120)	NC_044998.1	1205120	9233	0.186711
(1092479,1102382)(1210121,1220120)(1210121,1220121)	NC_044998.1	1215121	9905	0.2056
(1102384,1111785)(1220122,1230121)(1220122,1230122)	NC_044998.1	1225122	9403	0.182553
(1111787,1121531)(1230123,1240122)(1230123,1240123)	NC_044998.1	1235123	9746	0.145035
(1121533,1131325)(1240124,1250123)(1240124,1250124)	NC_044998.1	1245124	9794	0.21693
(1131327,1140935)(1250125,1260124)(1250125,1260125)	NC_044998.1	1255125	9610	0.214341
(1140937,1150165)(1260126,1270125)(1260126,1270126)	NC_044998.1	1265126	9230	0.255665
(1150167,1159329)(1270127,1280126)(1270127,1280127)	NC_044998.1	1275127	9164	0.150309
(1159331,1169019)(1280128,1290127)(1280128,1290128)	NC_044998.1	1285128	9690	0.156852
(1169021,1178849)(1290129,1300128)(1290129,1300129)	NC_044998.1	1295129	9830	0.140804
(1178851,1188575)(1300130,1310129)(1300130,1310130)	NC_044998.1	1305130	9726	0.171061
(1188577,1197755)(1310131,1320130)(1310131,1320131)	NC_044998.1	1315131	9180	0.127798
(1197757,1207383)(1320132,1330131)(1320132,1330132)	NC_044998.1	1325132	9628	0.14791
(1207385,1215868)(1330133,1340132)(1330133,1340133)	NC_044998.1	1335133	8485	0.136978
(1215870,1225674)(1340134,1350133)(1340134,1350134)	NC_044998.1	1345134	9806	0.147981
(1225676,1235421)(1350135,1360134)(1350135,1360135)	NC_044998.1	1355135	9747	0.166002
(1235423,1245171)(1360136,1370135)(1360136,1370136)	NC_044998.1	1365136	9750	0.145062
(1245173,1254985)(1370137,1380136)(1370137,1380137)	NC_044998.1	1375137	9814	0.242168
(1254987,1264598)(1380138,1390137)(1380138,1390138)	NC_044998.1	1385138	9613	0.145555
(1264600,1274471)(1390139,1400138)(1390139,1400139)	NC_044998.1	1395139	9873	0.211611
(1274473,1284242)(1400140,1410139)(1400140,1410140)	NC_044998.1	1405140	9771	0.258616
(1284244,1293640)(1410141,1420140)(1410141,1420141)	NC_044998.1	1415141	9398	0.2058
(1293642,1302219)(1420142,1430141)(1420142,1430142)	NC_044998.1	1425142	8579	0.263601
(1302221,1311589)(1430143,1440141)(1430143,1440143)	NC_044998.1	1435143	9370	0.314785
(1311590,1320751)(1440179,1450143)(1440144,1450144)	NC_044998.1	1445144	9163	0.194412
(1320753,1330605)(1450145,1460144)(1450145,1460145)	NC_044998.1	1455145	9854	0.300033
(1330607,1340047)(1460146,1470145)(1460146,1470146)	NC_044998.1	1465146	9442	0.232702
(1340049,1349330)(1470147,1480146)(1470147,1480147)	NC_044998.1	1475147	9283	0.225977
(1349332,1358158)(1480148,1490147)(1480148,1490148)	NC_044998.1	1485148	8828	0.269694
(1358160,1367815)(1490149,1500148)(1490149,1500149)	NC_044998.1	1495149	9657	0.265822
(1367817,1376779)(1500150,1510149)(1500150,1510150)	NC_044998.1	1505150	8964	0.22214
(1376781,1386228)(1510151,1520150)(1510151,1520151)	NC_044998.1	1515151	9449	0.246464
(1386230,1395545)(1520152,1530151)(1520152,1530152)	NC_044998.1	1525152	9317	0.202147
(1395547,1404669)(1530153,1540152)(1530153,1540153)	NC_044998.1	1535153	9124	0.153812
(1404671,1414001)(1540154,1550153)(1540154,1550154)	NC_044998.1	1545154	9332	0.143446
(1414003,1423684)(1550155,1560154)(1550155,1560155)	NC_044998.1	1555155	9683	0.186357
(1423686,1433504)(1560156,1570155)(1560156,1570156)	NC_044998.1	1565156	9820	0.130174
(1433506,1442956)(1570157,1580156)(1570157,1580157)	NC_044998.1	1575157	9452	0.177853
(1442958,1451911)(1580158,1590157)(1580158,1590158)	NC_044998.1	1585158	8955	0.12072
(1451913,1461015)(1590159,1600158)(1590159,1600159)	NC_044998.1	1595159	9104	0.17514
(1461017,1470836)(1600160,1610159)(1600160,1610160)	NC_044998.1	1605160	9821	0.183348
(1470838,1479592)(1610161,1620160)(1610161,1620161)	NC_044998.1	1615161	8756	0.217679
(1479594,1488903)(1620162,1630161)(1620162,1630162)	NC_044998.1	1625162	9311	0.173377
(1488905,1497996)(1630163,1640162)(1630163,1640163)	NC_044998.1	1635163	9093	0.144048
(1497998,1506743)(1640164,1650163)(1640164,1650164)	NC_044998.1	1645164	8747	0.167791
(1506745,1516241)(1650165,1660164)(1650165,1660165)	NC_044998.1	1655165	9498	0.166015
(1516243,1525841)(1660166,1670165)(1660166,1670166)	NC_044998.1	1665166	9600	0.177102
(1525843,1535729)(1670167,1680166)(1670167,1680167)	NC_044998.1	1675167	9888	0.184188
(1535731,1545385)(1680168,1690167)(1680168,1690168)	NC_044998.1	1685168	9656	0.140488
(1545387,1555089)(1690169,1700168)(1690169,1700169)	NC_044998.1	1695169	9704	0.090154
(1555091,1564115)(1700170,1710169)(1700170,1710170)	NC_044998.1	1705170	9026	0.218243
(1564117,1573784)(1710171,1720170)(1710171,1720171)	NC_044998.1	1715171	9669	0.165359
(1573786,1583622)(1720172,1730171)(1720172,1730172)	NC_044998.1	1725172	9838	0.233183
(1583624,1593449)(1730173,1740172)(1730173,1740173)	NC_044998.1	1735173	9827	0.198175
(1593451,1602311)(1740174,1750173)(1740174,1750174)	NC_044998.1	1745174	8862	0.185323
(1602313,1612021)(1750175,1760174)(1750175,1760175)	NC_044998.1	1755175	9710	0.174209
(1612023,1621407)(1760176,1770175)(1760176,1770176)	NC_044998.1	1765176	9386	0.2021
(1621409,1631047)(1770177,1780176)(1770177,1780177)	NC_044998.1	1775177	9640	0.200698
(1631049,1640460)(1780178,1790177)(1780178,1790178)	NC_044998.1	1785178	9413	0.204279
(1640462,1648700)(1790179,1800178)(1790179,1800179)	NC_044998.1	1795179	8240	0.220055
(1648702,1657667)(1800180,1810179)(1800180,1810180)	NC_044998.1	1805180	8967	0.165944
(1657669,1667210)(1810181,1819934)(1810181,1820181)	NC_044998.1	1815181	9543	0.184602
(1667211,1676705)(1820430,1830181)(1820182,1830182)	NC_044998.1	1825182	9496	0.186576
(1676707,1686270)(1830183,1840182)(1830183,1840183)	NC_044998.1	1835183	9565	0.179924
(1686272,1694833)(1840184,1850183)(1840184,1850184)	NC_044998.1	1845184	8563	0.272271
(1694835,1704054)(1850185,1860184)(1850185,1860185)	NC_044998.1	1855185	9221	0.167833
(1704056,1712600)(1860186,1870185)(1860186,1870186)	NC_044998.1	1865186	8546	0.191309
(1712602,1722283)(1870187,1880186)(1870187,1880187)	NC_044998.1	1875187	9683	0.23625
(1722285,1732103)(1880188,1890187)(1880188,1890188)	NC_044998.1	1885188	9820	0.165829
(1732105,1741778)(1890189,1900188)(1890189,1900189)	NC_044998.1	1895189	9675	0.181951
(1741780,1750835)(1900190,1910189)(1900190,1910190)	NC_044998.1	1905190	9057	0.201342
(1750837,1760016)(1910191,1920190)(1910191,1920191)	NC_044998.1	1915191	9181	0.207846
(1760018,1769754)(1920192,1930164)(1920192,1930192)	NC_044998.1	1925192	9738	0.205467
(1769755,1778735)(1930234,1940192)(1930193,1940193)	NC_044998.1	1935193	8982	0.201525
(1778737,1787692)(1940194,1949745)(1940194,1950194)	NC_044998.1	1945194	8957	0.290635
(1787693,1796961)(1950357,1960194)(1950195,1960195)	NC_044998.1	1955195	9270	0.194663
(1796963,1806875)(1960196,1970195)(1960196,1970196)	NC_044998.1	1965196	9914	0.20651
(1806877,1816569)(1970197,1980196)(1970197,1980197)	NC_044998.1	1975197	9694	0.21213
(1816571,1824158)(1980198,1990197)(1980198,1990198)	NC_044998.1	1985198	7589	0.195013
(1824160,1832300)(1990199,2000198)(1990199,2000199)	NC_044998.1	1995199	8142	0.283969
(1832302,1841577)(2000200,2010199)(2000200,2010200)	NC_044998.1	2005200	9277	0.353508
(1841579,1850735)(2010201,2020200)(2010201,2020201)	NC_044998.1	2015201	9158	0.2974
(1850737,1860256)(2020202,2030201)(2020202,2030202)	NC_044998.1	2025202	9521	0.29061
(1860258,1870154)(2030203,2040202)(2030203,2040203)	NC_044998.1	2035203	9898	0.374774
(1870156,1879032)(2040204,2050203)(2040204,2050204)	NC_044998.1	2045204	8878	0.338008
(1879034,1888881)(2050205,2060204)(2050205,2060205)	NC_044998.1	2055205	9849	0.437939
(1888883,1898741)(2060206,2070205)(2060206,2070206)	NC_044998.1	2065206	9860	0.299904
(1898743,1907940)(2070207,2080206)(2070207,2080207)	NC_044998.1	2075207	9199	0.326547
(1907942,1917781)(2080208,2090207)(2080208,2090208)	NC_044998.1	2085208	9841	0.342944
(1917783,1926248)(2090209,2100208)(2090209,2100209)	NC_044998.1	2095209	8467	0.410265
(1926250,1935089)(2100210,2110209)(2100210,2110210)	NC_044998.1	2105210	8841	0.253848
(1935091,1944872)(2110211,2120210)(2110211,2120211)	NC_044998.1	2115211	9783	0.220212
(1944874,1954629)(2120212,2130211)(2120212,2130212)	NC_044998.1	2125212	9757	0.20465
(1954631,1964201)(2130213,2140212)(2130213,2140213)	NC_044998.1	2135213	9572	0.265605
(1964203,1973965)(2140214,2150213)(2140214,2150214)	NC_044998.1	2145214	9764	0.247938
(1973967,1983654)(2150215,2160214)(2150215,2160215)	NC_044998.1	2155215	9689	0.250631
(1983656,1992594)(2160216,2170215)(2160216,2170216)	NC_044998.1	2165216	8940	0.199228
(1992596,2002176)(2170217,2180216)(2170217,2180217)	NC_044998.1	2175217	9582	0.251946
(2002178,2011256)(2180218,2190217)(2180218,2190218)	NC_044998.1	2185218	9080	0.292736
(2011258,2019705)(2190219,2200218)(2190219,2200219)	NC_044998.1	2195219	8449	0.242887
(2019707,2029570)(2200220,2210219)(2200220,2210220)	NC_044998.1	2205220	9865	0.24858
(2029572,2039423)(2210221,2220220)(2210221,2220221)	NC_044998.1	2215221	9853	0.305697
(2039425,2048707)(2220222,2230221)(2220222,2230222)	NC_044998.1	2225222	9284	0.210804
(2048709,2058609)(2230223,2240222)(2230223,2240223)	NC_044998.1	2235223	9902	0.303822
(2058611,2068222)(2240224,2250223)(2240224,2250224)	NC_044998.1	2245224	9613	0.307615
(2068224,2077453)(2250225,2260224)(2250225,2260225)	NC_044998.1	2255225	9231	0.213311
(2077455,2087208)(2260226,2270225)(2260226,2270226)	NC_044998.1	2265226	9755	0.263761
(2087210,2096805)(2270227,2280226)(2270227,2280227)	NC_044998.1	2275227	9597	0.27783
(2096807,2105769)(2280228,2290227)(2280228,2290228)	NC_044998.1	2285228	8964	0.259164
(2105771,2114661)(2290229,2300228)(2290229,2300229)	NC_044998.1	2295229	8892	0.191403
(2114663,2124189)(2300230,2310229)(2300230,2310230)	NC_044998.1	2305230	9528	0.217296
(2124191,2132983)(2310231,2320230)(2310231,2320231)	NC_044998.1	2315231	8794	0.182006
(2132985,2141632)(2320232,2330231)(2320232,2330232)	NC_044998.1	2325232	8649	0.252088
(2141634,2151019)(2330233,2340232)(2330233,2340233)	NC_044998.1	2335233	9387	0.261429
(2151021,2160210)(2340234,2350233)(2340234,2350234)	NC_044998.1	2345234	9191	0.17294
(2160212,2169806)(2350235,2360234)(2350235,2360235)	NC_044998.1	2355235	9596	0.186808
(2169808,2179473)(2360236,2370235)(2360236,2370236)	NC_044998.1	2365236	9667	0.18343
(2179475,2188371)(2370237,2380236)(2370237,2380237)	NC_044998.1	2375237	8898	0.250881
(2188373,2196869)(2380238,2390237)(2380238,2390238)	NC_044998.1	2385238	8498	0.178139
(2196871,2206432)(2390239,2399937)(2390239,2400239)	NC_044998.1	2395239	9563	0.203418
(2206433,2214694)(2401823,2410239)(2400240,2410240)	NC_044998.1	2405240	8263	0.313477
(2214696,2222486)(2410241,2420091)(2410241,2420241)	NC_044998.1	2415241	7792	0.247005
(2222487,2231866)(2420350,2430162)(2420242,2430242)	NC_044998.1	2425242	9381	0.174436
(2231867,2240531)(2430781,2440242)(2430243,2440243)	NC_044998.1	2435243	8666	0.203218
(2240533,2250358)(2440244,2450243)(2440244,2450244)	NC_044998.1	2445244	9827	0.202973
(2250360,2260093)(2450245,2460244)(2450245,2460245)	NC_044998.1	2455245	9735	0.232887
(2260095,2270034)(2460246,2470245)(2460246,2470246)	NC_044998.1	2465246	9941	0.193726
(2270036,2279753)(2470247,2480246)(2470247,2480247)	NC_044998.1	2475247	9719	0.203152
(2279755,2289261)(2480248,2490247)(2480248,2490248)	NC_044998.1	2485248	9508	0.162555
(2289263,2298431)(2490249,2500248)(2490249,2500249)	NC_044998.1	2495249	9170	0.214567
(2298433,2306854)(2500250,2510249)(2500250,2510250)	NC_044998.1	2505250	8423	0.278874
(2306856,2316508)(2510251,2520106)(2510251,2520251)	NC_044998.1	2515251	9654	0.216218
(2316509,2326018)(2520645,2530251)(2520252,2530252)	NC_044998.1	2525252	9511	0.208898
(2326020,2335676)(2530253,2540252)(2530253,2540253)	NC_044998.1	2535253	9658	0.177261
(2335678,2345155)(2540254,2550253)(2540254,2550254)	NC_044998.1	2545254	9479	0.204874
(2345157,2354775)(2550255,2560254)(2550255,2560255)	NC_044998.1	2555255	9620	0.212965
(2354777,2364543)(2560256,2570255)(2560256,2570256)	NC_044998.1	2565256	9768	0.281998
(2364545,2373821)(2570257,2580256)(2570257,2580257)	NC_044998.1	2575257	9278	0.251199
(2373823,2383689)(2580258,2590255)(2580258,2590258)	NC_044998.1	2585258	9868	0.26954
(2383690,2393413)(2590259,2600258)(2590259,2600259)	NC_044998.1	2595259	9725	0.172659
(2393415,2400540)(2600260,2610259)(2600260,2610260)	NC_044998.1	2605260	7127	0.176141
(2400542,2408812)(2610261,2620260)(2610261,2620261)	NC_044998.1	2615261	8272	0.207992
(2408814,2418625)(2620262,2630261)(2620262,2630262)	NC_044998.1	2625262	9813	0.253672
(2418627,2427555)(2630263,2640262)(2630263,2640263)	NC_044998.1	2635263	8930	0.188269
(2427557,2437277)(2640264,2650263)(2640264,2650264)	NC_044998.1	2645264	9722	0.176736
(2437279,2447138)(2650265,2660264)(2650265,2660265)	NC_044998.1	2655265	9861	0.178238
(2447140,2456347)(2660266,2670265)(2660266,2670266)	NC_044998.1	2665266	9209	0.140925
(2456349,2465690)(2670267,2680266)(2670267,2680267)	NC_044998.1	2675267	9343	0.183328
(2465692,2475387)(2680268,2690267)(2680268,2690268)	NC_044998.1	2685268	9697	0.143273
(2475389,2485265)(2690269,2700268)(2690269,2700269)	NC_044998.1	2695269	9878	0.108252
(2485267,2494509)(2700270,2710269)(2700270,2710270)	NC_044998.1	2705270	9244	0.134946
(2494511,2504162)(2710271,2720236)(2710271,2720271)	NC_044998.1	2715271	9653	0.263023
(2504163,2513407)(2720881,2730271)(2720272,2730272)	NC_044998.1	2725272	9246	0.166761
(2513409,2522391)(2730273,2740272)(2730273,2740273)	NC_044998.1	2735273	8984	0.09185
(2522393,2531723)(2740274,2750273)(2740274,2750274)	NC_044998.1	2745274	9332	0.10706
(2531725,2541257)(2750275,2760274)(2750275,2760275)	NC_044998.1	2755275	9534	0.199961
(2541259,2550463)(2760276,2770232)(2760276,2770276)	NC_044998.1	2765276	9206	0.138412
(2550464,2559433)(2770343,2780276)(2770277,2780277)	NC_044998.1	2775277	8971	0.219815
(2559435,2568236)(2780278,2789664)(2780278,2790278)	NC_044998.1	2785278	8803	0.218215
(2568237,2574268)(2790300,2800278)(2790279,2800279)	NC_044998.1	2795279	6033	0.237468
(2574270,2584102)(2800280,2810279)(2800280,2810280)	NC_044998.1	2805280	9834	0.208652
(2584104,2593161)(2810281,2820280)(2810281,2820281)	NC_044998.1	2815281	9059	0.266311
(2593163,2602939)(2820282,2830281)(2820282,2830282)	NC_044998.1	2825282	9778	0.262191
(2602941,2612680)(2830283,2840282)(2830283,2840283)	NC_044998.1	2835283	9741	0.221193
(2612682,2618365)(2840284,2850283)(2840284,2850284)	NC_044998.1	2845284	5685	0.299814
(2618367,2627665)(2850285,2860284)(2850285,2860285)	NC_044998.1	2855285	9300	0.275901
(2627667,2637005)(2860286,2870285)(2860286,2870286)	NC_044998.1	2865286	9340	0.22026
(2637007,2646450)(2870287,2880286)(2870287,2880287)	NC_044998.1	2875287	9445	0.188138
(2646452,2655409)(2880288,2890287)(2880288,2890288)	NC_044998.1	2885288	8959	0.201701
(2655411,2665003)(2890289,2900288)(2890289,2900289)	NC_044998.1	2895289	9594	0.168562
(2665005,2674002)(2900290,2910289)(2900290,2910290)	NC_044998.1	2905290	8999	0.193874
(2674004,2683735)(2910291,2920290)(2910291,2920291)	NC_044998.1	2915291	9733	0.239413
(2683737,2693224)(2920292,2930291)(2920292,2930292)	NC_044998.1	2925292	9489	0.237974
(2693226,2702198)(2930293,2940292)(2930293,2940293)	NC_044998.1	2935293	8974	0.219227
(2702200,2711911)(2940294,2950293)(2940294,2950294)	NC_044998.1	2945294	9713	0.309978
(2711913,2721024)(2950295,2960294)(2950295,2960295)	NC_044998.1	2955295	9113	0.212397
(2721026,2729695)(2960296,2970295)(2960296,2970296)	NC_044998.1	2965296	8671	0.235536
(2729697,2739481)(2970297,2980296)(2970297,2980297)	NC_044998.1	2975297	9786	0.24158
(2739483,2748798)(2980298,2990297)(2980298,2990298)	NC_044998.1	2985298	9317	0.184644
(2748800,2758133)(2990299,3000298)(2990299,3000299)	NC_044998.1	2995299	9335	0.143225
(2758135,2767187)(3000300,3010299)(3000300,3010300)	NC_044998.1	3005300	9054	0.207032
(2767189,2776656)(3010301,3020300)(3010301,3020301)	NC_044998.1	3015301	9469	0.154316
(2776658,2786322)(3020302,3030301)(3020302,3030302)	NC_044998.1	3025302	9666	0.157342
(2786324,2795930)(3030303,3040302)(3030303,3040303)	NC_044998.1	3035303	9608	0.210323
(2795932,2805654)(3040304,3050303)(3040304,3050304)	NC_044998.1	3045304	9724	0.243935
(2805656,2815177)(3050305,3060304)(3050305,3060305)	NC_044998.1	3055305	9523	0.211516
(2815179,2824594)(3060306,3070305)(3060306,3070306)	NC_044998.1	3065306	9417	0.2302
(2824596,2834225)(3070307,3080306)(3070307,3080307)	NC_044998.1	3075307	9631	0.217136
(2834227,2843437)(3080308,3090153)(3080308,3090308)	NC_044998.1	3085308	9212	0.299105
(2843438,2852901)(3090330,3100308)(3090309,3100309)	NC_044998.1	3095309	9465	0.303943
(2852903,2861856)(3100310,3110276)(3100310,3110310)	NC_044998.1	3105310	8955	0.153225
(2861857,2869275)(3110789,3120310)(3110311,3120311)	NC_044998.1	3115311	7420	0.17959
(2869277,2878081)(3120312,3129406)(3120312,3130312)	NC_044998.1	3125312	8806	0.256203
(2878082,2885884)(3131147,3140312)(3130313,3140313)	NC_044998.1	3135313	7804	0.181426
(2885886,2895675)(3140314,3150313)(3140314,3150314)	NC_044998.1	3145314	9791	0.202431
(2895677,2904677)(3150315,3160313)(3150315,3160315)	NC_044998.1	3155315	9002	0.161507
(2904679,2913124)(3160316,3170315)(3160316,3170316)	NC_044998.1	3165316	8447	0.236332
(2913126,2922823)(3170317,3180316)(3170317,3180317)	NC_044998.1	3175317	9699	0.255138
(2922825,2932454)(3180318,3190317)(3180318,3190318)	NC_044998.1	3185318	9631	0.199664
(2932456,2942115)(3190319,3200318)(3190319,3200319)	NC_044998.1	3195319	9661	0.401638
(2942117,2950683)(3200320,3210319)(3200320,3210320)	NC_044998.1	3205320	8568	0.204342
(2950685,2959964)(3210321,3220270)(3210321,3220321)	NC_044998.1	3215321	9281	0.202138
(2959965,2969544)(3220519,3230321)(3220322,3230322)	NC_044998.1	3225322	9581	0.163206
(2969546,2979339)(3230323,3240322)(3230323,3240323)	NC_044998.1	3235323	9795	0.229474
(2979341,2988252)(3240324,3250321)(3240324,3250324)	NC_044998.1	3245324	8913	0.278948
(2988253,2997410)(3250326,3260324)(3250325,3260325)	NC_044998.1	3255325	9159	0.20272
(2997412,3006707)(3260326,3269875)(3260326,3270326)	NC_044998.1	3265326	9297	0.2803
(3006708,3016410)(3270501,3280326)(3270327,3280327)	NC_044998.1	3275327	9704	0.235011
(3016412,3025751)(3280328,3290327)(3280328,3290328)	NC_044998.1	3285328	9341	0.166083
(3025753,3035589)(3290329,3300328)(3290329,3300329)	NC_044998.1	3295329	9838	0.200465
(3035591,3045345)(3300330,3310329)(3300330,3310330)	NC_044998.1	3305330	9756	0.197074
(3045347,3055121)(3310331,3320330)(3310331,3320331)	NC_044998.1	3315331	9776	0.266724
(3055123,3064910)(3320332,3330331)(3320332,3330332)	NC_044998.1	3325332	9789	0.167483
(3064912,3074756)(3330333,3340332)(3330333,3340333)	NC_044998.1	3335333	9846	0.202213
(3074758,3084561)(3340334,3350333)(3340334,3350334)	NC_044998.1	3345334	9805	0.175708
(3084563,3094448)(3350335,3360334)(3350335,3360335)	NC_044998.1	3355335	9887	0.201078
(3094450,3103830)(3360336,3370333)(3360336,3370336)	NC_044998.1	3365336	9382	0.195225
(3103831,3112973)(3370338,3380336)(3370337,3380337)	NC_044998.1	3375337	9144	0.129136
(3112975,3122877)(3380338,3390337)(3380338,3390338)	NC_044998.1	3385338	9904	0.188433
(3122879,3132753)(3390339,3400338)(3390339,3400339)	NC_044998.1	3395339	9876	0.226076
(3132755,3142643)(3400340,3410339)(3400340,3410340)	NC_044998.1	3405340	9890	0.272979
(3142645,3152518)(3410341,3420340)(3410341,3420341)	NC_044998.1	3415341	9875	0.184962
(3152520,3162269)(3420342,3430341)(3420342,3430342)	NC_044998.1	3425342	9751	0.148173
(3162271,3171258)(3430343,3440342)(3430343,3440343)	NC_044998.1	3435343	8989	0.149655
(3171260,3180616)(3440344,3450343)(3440344,3450344)	NC_044998.1	3445344	9358	0.125728
(3180618,3189656)(3450345,3459953)(3450345,3460345)	NC_044998.1	3455345	9040	0.118302
(3189657,3195939)(3462988,3470345)(3460346,3470346)	NC_044998.1	3465346	6284	0.139981
(3195941,3204837)(3470347,3480346)(3470347,3480347)	NC_044998.1	3475347	8898	0.116832
(3204839,3213772)(3480348,3490347)(3480348,3490348)	NC_044998.1	3485348	8935	0.194161
(3213774,3223464)(3490349,3500348)(3490349,3500349)	NC_044998.1	3495349	9692	0.173276
(3223466,3232472)(3500350,3510349)(3500350,3510350)	NC_044998.1	3505350	9008	0.146502
(3232474,3242309)(3510351,3520350)(3510351,3520351)	NC_044998.1	3515351	9837	0.188796
(3242311,3250977)(3520352,3530351)(3520352,3530352)	NC_044998.1	3525352	8668	0.173729
(3250979,3259449)(3530353,3540318)(3530353,3540353)	NC_044998.1	3535353	8472	0.140993
(3259450,3266056)(3540364,3549677)(3540354,3550354)	NC_044998.1	3545354	6608	0.163304
(3266057,3274861)(3550437,3560354)(3550355,3560355)	NC_044998.1	3555355	8806	0.251162
(3274863,3284649)(3560356,3570355)(3560356,3570356)	NC_044998.1	3565356	9788	0.212035
(3284651,3294506)(3570357,3580356)(3570357,3580357)	NC_044998.1	3575357	9857	0.169623
(3294508,3304189)(3580358,3590357)(3580358,3590358)	NC_044998.1	3585358	9683	0.135954
(3304191,3313404)(3590359,3600358)(3590359,3600359)	NC_044998.1	3595359	9215	0.158466
(3313406,3322582)(3600360,3610359)(3600360,3610360)	NC_044998.1	3605360	9178	0.148764
(3322584,3331784)(3610361,3620360)(3610361,3620361)	NC_044998.1	3615361	9202	0.144668
(3331786,3341490)(3620362,3630361)(3620362,3630362)	NC_044998.1	3625362	9706	0.246548
(3341492,3351146)(3630363,3640362)(3630363,3640363)	NC_044998.1	3635363	9656	0.166096
(3351148,3360962)(3640364,3650363)(3640364,3650364)	NC_044998.1	3645364	9816	0.150735
(3360964,3368797)(3650365,3660358)(3650365,3660365)	NC_044998.1	3655365	7835	0.127092
(3368798,3378288)(3660367,3670365)(3660366,3670366)	NC_044998.1	3665366	9492	0.170802
(3378290,3388006)(3670367,3680366)(3670367,3680367)	NC_044998.1	3675367	9718	0.185387
(3388008,3395473)(3680368,3690367)(3680368,3690368)	NC_044998.1	3685368	7467	0.22303
(3395475,3405391)(3690369,3700368)(3690369,3700369)	NC_044998.1	3695369	9918	0.218457
(3405393,3414099)(3700370,3710369)(3700370,3710370)	NC_044998.1	3705370	8708	0.19633
(3414101,3423063)(3710371,3720370)(3710371,3720371)	NC_044998.1	3715371	8964	0.140155
(3423065,3432252)(3720372,3730371)(3720372,3730372)	NC_044998.1	3725372	9189	0.18189
(3432254,3442058)(3730373,3740372)(3730373,3740373)	NC_044998.1	3735373	9806	0.20937
(3442060,3451589)(3740374,3750373)(3740374,3750374)	NC_044998.1	3745374	9531	0.256466
(3451591,3460876)(3750375,3760374)(3750375,3760375)	NC_044998.1	3755375	9287	0.203056
(3460878,3470701)(3760376,3770375)(3760376,3770376)	NC_044998.1	3765376	9825	0.183548
(3470703,3480398)(3770377,3780376)(3770377,3780377)	NC_044998.1	3775377	9697	0.169846
(3480400,3490073)(3780378,3790377)(3780378,3790378)	NC_044998.1	3785378	9675	0.147069
(3490075,3498572)(3790379,3800130)(3790379,3800379)	NC_044998.1	3795379	8499	0.156564
(3498573,3507606)(3800549,3810379)(3800380,3810380)	NC_044998.1	3805380	9035	0.132129
(3507608,3517239)(3810381,3820380)(3810381,3820381)	NC_044998.1	3815381	9633	0.178795
(3517241,3525568)(3820382,3828848)(3820382,3830382)	NC_044998.1	3825382	8329	0.178861
(3525569,3533973)(3830693,3840382)(3830383,3840383)	NC_044998.1	3835383	8406	0.210279
(3533975,3543606)(3840384,3850383)(3840384,3850384)	NC_044998.1	3845384	9633	0.156152
(3543608,3552702)(3850385,3860384)(3850385,3860385)	NC_044998.1	3855385	9096	0.168001
(3552704,3560889)(3860386,3870385)(3860386,3870386)	NC_044998.1	3865386	8187	0.106818
(3560891,3570565)(3870387,3880386)(3870387,3880387)	NC_044998.1	3875387	9676	0.17324
(3570567,3580240)(3880388,3890387)(3880388,3890388)	NC_044998.1	3885388	9675	0.131733
(3580242,3589075)(3890389,3900388)(3890389,3900389)	NC_044998.1	3895389	8835	0.135461
(3589077,3598628)(3900390,3910389)(3900390,3910390)	NC_044998.1	3905390	9553	0.113977
(3598630,3608525)(3910391,3920390)(3910391,3920391)	NC_044998.1	3915391	9897	0.143257
(3608527,3618443)(3920392,3930391)(3920392,3930392)	NC_044998.1	3925392	9918	0.138071
(3618445,3624640)(3930393,3940150)(3930393,3940393)	NC_044998.1	3935393	6197	0.102784
(3624641,3633909)(3940521,3949865)(3940394,3950394)	NC_044998.1	3945394	9270	0.13279
(3633910,3643713)(3950484,3960394)(3950395,3960395)	NC_044998.1	3955395	9805	0.148697
(3643715,3653495)(3960396,3970395)(3960396,3970396)	NC_044998.1	3965396	9782	0.167238
(3653497,3663405)(3970397,3980396)(3970397,3980397)	NC_044998.1	3975397	9910	0.086931
(3663407,3670857)(3980398,3990397)(3980398,3990398)	NC_044998.1	3985398	7452	0.081554
(3670859,3679563)(3990399,4000398)(3990399,4000399)	NC_044998.1	3995399	8706	0.133592
(3679565,3689486)(4000400,4010399)(4000400,4010400)	NC_044998.1	4005400	9923	0.15916
(3689488,3699387)(4010401,4020400)(4010401,4020401)	NC_044998.1	4015401	9901	0.136807
(3699389,3708107)(4020402,4030401)(4020402,4030402)	NC_044998.1	4025402	8720	0.115831
(3708109,3717832)(4030403,4040402)(4030403,4040403)	NC_044998.1	4035403	9725	0.132218
(3717834,3726282)(4040404,4050403)(4040404,4050404)	NC_044998.1	4045404	8450	0.138374
(3726284,3735826)(4050405,4060404)(4050405,4060405)	NC_044998.1	4055405	9544	0.187649
(3735828,3745603)(4060406,4070326)(4060406,4070406)	NC_044998.1	4065406	9777	0.140883
(3745604,3755014)(4070550,4080406)(4070407,4080407)	NC_044998.1	4075407	9412	0.077232
(3755016,3764648)(4080408,4090407)(4080408,4090408)	NC_044998.1	4085408	9634	0.138496
(3764650,3773101)(4090409,4100408)(4090409,4100409)	NC_044998.1	4095409	8453	0.148592
(3773103,3781550)(4100410,4110409)(4100410,4110410)	NC_044998.1	4105410	8449	0.138507
(3781552,3791246)(4110411,4120410)(4110411,4120411)	NC_044998.1	4115411	9696	0.102693
(3791248,3799952)(4120412,4130411)(4120412,4130412)	NC_044998.1	4125412	8706	0.113606
(3799954,3809798)(4130413,4140412)(4130413,4140413)	NC_044998.1	4135413	9846	0.113251
(3809800,3819361)(4140414,4150413)(4140414,4150414)	NC_044998.1	4145414	9563	0.110648
(3819363,3829071)(4150415,4160414)(4150415,4160415)	NC_044998.1	4155415	9710	0.136745
(3829073,3839023)(4160416,4170415)(4160416,4170416)	NC_044998.1	4165416	9952	0.180328
(3839025,3848908)(4170417,4180416)(4170417,4180417)	NC_044998.1	4175417	9885	0.156431
(3848910,3858854)(4180418,4190417)(4180418,4190418)	NC_044998.1	4185418	9946	0.211867
(3858856,3867354)(4190419,4199421)(4190419,4200419)	NC_044998.1	4195419	8500	0.166264
(3867355,3871089)(4215703,4220420)(4210421,4220421)	NC_044998.1	4215421	3736	0.186916
(3871091,3879008)(4220422,4230421)(4220422,4230422)	NC_044998.1	4225422	7919	0.162654
(3879010,3888272)(4230423,4240422)(4230423,4240423)	NC_044998.1	4235423	9264	0.199005
(3888274,3897548)(4240424,4250423)(4240424,4250424)	NC_044998.1	4245424	9276	0.136503
(3897550,3906327)(4250425,4260424)(4250425,4260425)	NC_044998.1	4255425	8779	0.175988
(3906329,3915280)(4260426,4270425)(4260426,4270426)	NC_044998.1	4265426	8953	0.214495
(3915282,3923826)(4270427,4280426)(4270427,4280427)	NC_044998.1	4275427	8546	0.13508
(3923828,3933726)(4280428,4290427)(4280428,4290428)	NC_044998.1	4285428	9900	0.097137
(3933728,3943070)(4290429,4300428)(4290429,4300429)	NC_044998.1	4295429	9344	0.145942
(3943072,3952495)(4300430,4310429)(4300430,4310430)	NC_044998.1	4305430	9425	0.112573
(3952497,3962320)(4310431,4320430)(4310431,4320431)	NC_044998.1	4315431	9825	0.103102
(3962322,3971077)(4320432,4330102)(4320432,4330432)	NC_044998.1	4325432	8757	0.255083
(3971078,3978531)(4331641,4340432)(4330433,4340433)	NC_044998.1	4335433	7455	0.243117
(3978533,3987474)(4340434,4350433)(4340434,4350434)	NC_044998.1	4345434	8943	0.239477
(3987476,3996829)(4350435,4360434)(4350435,4360435)	NC_044998.1	4355435	9355	0.159366
(3996831,4006283)(4360436,4370435)(4360436,4370436)	NC_044998.1	4365436	9454	0.256965
(4006285,4015859)(4370437,4380436)(4370437,4380437)	NC_044998.1	4375437	9576	0.194755
(4015861,4025364)(4380438,4390437)(4380438,4390438)	NC_044998.1	4385438	9505	0.225484
(4025366,4034545)(4390439,4400438)(4390439,4400439)	NC_044998.1	4395439	9181	0.189422
(4034547,4042975)(4400440,4410439)(4400440,4410440)	NC_044998.1	4405440	8430	0.159948
(4042977,4052645)(4410441,4420440)(4410441,4420441)	NC_044998.1	4415441	9670	0.162511
(4052647,4062509)(4420442,4430441)(4420442,4430442)	NC_044998.1	4425442	9864	0.231053
(4062511,4072362)(4430443,4440442)(4430443,4440443)	NC_044998.1	4435443	9853	0.212407
(4072364,4082262)(4440444,4450443)(4440444,4450444)	NC_044998.1	4445444	9900	0.181326
(4082264,4090345)(4450445,4460310)(4450445,4460445)	NC_044998.1	4455445	8083	0.173188
(4090346,4100160)(4460472,4470445)(4460446,4470446)	NC_044998.1	4465446	9816	0.20162
(4100162,4109929)(4470447,4480446)(4470447,4480447)	NC_044998.1	4475447	9769	0.256154
(4109931,4119656)(4480448,4490447)(4480448,4490448)	NC_044998.1	4485448	9727	0.254292
(4119658,4129326)(4490449,4500448)(4490449,4500449)	NC_044998.1	4495449	9670	0.287708
(4129328,4135841)(4500450,4510449)(4500450,4510450)	NC_044998.1	4505450	6515	0.31414
(4135843,4145065)(4510451,4520450)(4510451,4520451)	NC_044998.1	4515451	9224	0.317527
(4145067,4153032)(4520452,4530451)(4520452,4530452)	NC_044998.1	4525452	7967	0.221348
(4153034,4162900)(4530453,4540452)(4530453,4540453)	NC_044998.1	4535453	9868	0.282794
(4162902,4171969)(4540454,4550453)(4540454,4550454)	NC_044998.1	4545454	9069	0.229931
(4171971,4180670)(4550455,4560454)(4550455,4560455)	NC_044998.1	4555455	8701	0.276572
(4180672,4187437)(4560456,4570455)(4560456,4570456)	NC_044998.1	4565456	6767	0.423147
(4187439,4197212)(4570457,4580456)(4570457,4580457)	NC_044998.1	4575457	9775	0.168717
(4197214,4207007)(4580458,4590457)(4580458,4590458)	NC_044998.1	4585458	9795	0.19934
(4207009,4215436)(4590459,4600458)(4590459,4600459)	NC_044998.1	4595459	8429	0.267217
(4215438,4225027)(4600460,4610459)(4600460,4610460)	NC_044998.1	4605460	9591	0.218848
(4225029,4234196)(4610461,4620460)(4610461,4620461)	NC_044998.1	4615461	9169	0.181996
(4234198,4243435)(4620462,4630461)(4620462,4630462)	NC_044998.1	4625462	9239	0.215284
(4243437,4252555)(4630463,4640462)(4630463,4640463)	NC_044998.1	4635463	9120	0.213778
(4252557,4260382)(4640464,4650463)(4640464,4650464)	NC_044998.1	4645464	7827	0.260527
(4260384,4270301)(4650465,4660464)(4650465,4660465)	NC_044998.1	4655465	9919	0.177745
(4270303,4279541)(4660466,4670465)(4660466,4670466)	NC_044998.1	4665466	9240	0.293882
(4279543,4289298)(4670467,4680466)(4670467,4680467)	NC_044998.1	4675467	9757	0.247112
(4289300,4299194)(4680468,4690467)(4680468,4690468)	NC_044998.1	4685468	9896	0.184723
(4299196,4309079)(4690469,4700468)(4690469,4700469)	NC_044998.1	4695469	9885	0.188982
(4309081,4318955)(4700470,4710469)(4700470,4710470)	NC_044998.1	4705470	9876	0.173345
(4318957,4328862)(4710471,4720470)(4710471,4720471)	NC_044998.1	4715471	9907	0.183647
(4328864,4338258)(4720472,4730471)(4720472,4730472)	NC_044998.1	4725472	9396	0.160928
(4338260,4348133)(4730473,4740472)(4730473,4740473)	NC_044998.1	4735473	9875	0.231545
(4348135,4357402)(4740474,4750473)(4740474,4750474)	NC_044998.1	4745474	9269	0.156582
(4357404,4366492)(4750475,4760474)(4750475,4760475)	NC_044998.1	4755475	9090	0.144144
(4366494,4376314)(4760476,4770475)(4760476,4770476)	NC_044998.1	4765476	9822	0.196253
(4376316,4385791)(4770477,4780476)(4770477,4780477)	NC_044998.1	4775477	9477	0.245389
(4385793,4395527)(4780478,4790477)(4780478,4790478)	NC_044998.1	4785478	9736	0.184178
(4395529,4405080)(4790479,4800478)(4790479,4800479)	NC_044998.1	4795479	9553	0.19539
(4405082,4414907)(4800480,4810479)(4800480,4810480)	NC_044998.1	4805480	9827	0.176234
(4414909,4424301)(4810481,4820081)(4810481,4820481)	NC_044998.1	4815481	9394	0.167552
(4424302,4433916)(4820766,4830481)(4820482,4830482)	NC_044998.1	4825482	9616	0.140866
(4433918,4443775)(4830483,4840482)(4830483,4840483)	NC_044998.1	4835483	9859	0.112551
(4443777,4452809)(4840484,4850483)(4840484,4850484)	NC_044998.1	4845484	9034	0.186675
(4452811,4461485)(4850485,4859529)(4850485,4860485)	NC_044998.1	4855485	8676	0.113061
(4461486,4469402)(4861888,4870485)(4860486,4870486)	NC_044998.1	4865486	7918	0.123085
(4469404,4479047)(4870487,4880486)(4870487,4880487)	NC_044998.1	4875487	9645	0.134819
(4479049,4489016)(4880488,4890487)(4880488,4890488)	NC_044998.1	4885488	9969	0.159506
(4489018,4498873)(4890489,4900488)(4890489,4900489)	NC_044998.1	4895489	9857	0.139678
(4498875,4508040)(4900490,4910489)(4900490,4910490)	NC_044998.1	4905490	9167	0.170235
(4508042,4513978)(4910491,4919054)(4910491,4920491)	NC_044998.1	4915491	5938	0.111634
(4513979,4522594)(4921075,4930491)(4920492,4930492)	NC_044998.1	4925492	8617	0.193368
(4522596,4532216)(4930493,4940492)(4930493,4940493)	NC_044998.1	4935493	9622	0.221035
(4532218,4541859)(4940494,4950493)(4940494,4950494)	NC_044998.1	4945494	9643	0.190567
(4541861,4550762)(4950495,4960494)(4950495,4960495)	NC_044998.1	4955495	8903	0.155756
(4550764,4557401)(4960496,4970495)(4960496,4970496)	NC_044998.1	4965496	6639	0.120973
(4557403,4567193)(4970497,4980496)(4970497,4980497)	NC_044998.1	4975497	9792	0.155222
(4567195,4576405)(4980498,4990497)(4980498,4990498)	NC_044998.1	4985498	9212	0.154773
(4576407,4586260)(4990499,5000498)(4990499,5000499)	NC_044998.1	4995499	9855	0.133926
(4586262,4596099)(5000500,5010499)(5000500,5010500)	NC_044998.1	5005500	9839	0.204079
(4596101,4606009)(5010501,5020500)(5010501,5020501)	NC_044998.1	5015501	9910	0.168564
(4606011,4615855)(5020502,5030501)(5020502,5030502)	NC_044998.1	5025502	9846	0.185627
(4615857,4625640)(5030503,5040502)(5030503,5040503)	NC_044998.1	5035503	9785	0.192263
(4625642,4634997)(5040504,5050503)(5040504,5050504)	NC_044998.1	5045504	9357	0.183255
(4634999,4644863)(5050505,5060504)(5050505,5060505)	NC_044998.1	5055505	9866	0.158578
(4644865,4652954)(5060506,5070505)(5060506,5070506)	NC_044998.1	5065506	8091	0.192466
(4652956,4662467)(5070507,5080506)(5070507,5080507)	NC_044998.1	5075507	9513	0.2464
(4662469,4672294)(5080508,5090507)(5080508,5090508)	NC_044998.1	5085508	9827	0.265328
(4672296,4681507)(5090509,5100508)(5090509,5100509)	NC_044998.1	5095509	9213	0.267754
(4681509,4691376)(5100510,5110509)(5100510,5110510)	NC_044998.1	5105510	9869	0.221791
(4691378,4701062)(5110511,5120510)(5110511,5120511)	NC_044998.1	5115511	9686	0.240008
(4701064,4710096)(5120512,5130511)(5120512,5130512)	NC_044998.1	5125512	9034	0.365482
(4710098,4719317)(5130513,5140512)(5130513,5140513)	NC_044998.1	5135513	9221	0.253749
(4719319,4727848)(5140514,5150513)(5140514,5150514)	NC_044998.1	5145514	8531	0.185166
(4727850,4737701)(5150515,5160514)(5150515,5160515)	NC_044998.1	5155515	9853	0.223747
(4737703,4747421)(5160516,5170515)(5160516,5170516)	NC_044998.1	5165516	9720	0.200341
(4747423,4757316)(5170517,5180516)(5170517,5180517)	NC_044998.1	5175517	9895	0.159001
(4757318,4767183)(5180518,5190517)(5180518,5190518)	NC_044998.1	5185518	9867	0.148497
(4767185,4776461)(5190519,5200518)(5190519,5200519)	NC_044998.1	5195519	9278	0.210645
(4776463,4786038)(5200520,5210519)(5200520,5210520)	NC_044998.1	5205520	9577	0.20096
(4786040,4795316)(5210521,5220520)(5210521,5220521)	NC_044998.1	5215521	9278	0.153761
(4795318,4804920)(5220522,5230521)(5220522,5230522)	NC_044998.1	5225522	9604	0.26633
(4804922,4814088)(5230523,5240522)(5230523,5240523)	NC_044998.1	5235523	9168	0.250167
(4814090,4823971)(5240524,5250523)(5240524,5250524)	NC_044998.1	5245524	9883	0.221381
(4823973,4833329)(5250525,5260524)(5250525,5260525)	NC_044998.1	5255525	9358	0.206022
(4833331,4841088)(5260526,5270525)(5260526,5270526)	NC_044998.1	5265526	7759	0.21552
(4841090,4850478)(5270527,5280526)(5270527,5280527)	NC_044998.1	5275527	9390	0.173744
(4850480,4859089)(5280528,5290527)(5280528,5290528)	NC_044998.1	5285528	8611	0.220206
(4859091,4867195)(5290529,5300528)(5290529,5300529)	NC_044998.1	5295529	8106	0.276561
(4867197,4874346)(5300530,5310529)(5300530,5310530)	NC_044998.1	5305530	7151	0.14205
(4874348,4883736)(5310531,5320530)(5310531,5320531)	NC_044998.1	5315531	9390	0.156889
(4883738,4893477)(5320532,5330531)(5320532,5330532)	NC_044998.1	5325532	9741	0.162474
(4893479,4903343)(5330533,5340532)(5330533,5340533)	NC_044998.1	5335533	9866	0.173709
(4903345,4910913)(5340534,5350533)(5340534,5350534)	NC_044998.1	5345534	7570	0.166309
(4910915,4920470)(5350536,5360534)(5350535,5360535)	NC_044998.1	5355535	9557	0.189202
(4920472,4929302)(5360536,5370535)(5360536,5370536)	NC_044998.1	5365536	8832	0.15489
(4929304,4938804)(5370537,5380536)(5370537,5380537)	NC_044998.1	5375537	9502	0.165736
(4938806,4948669)(5380538,5390537)(5380538,5390538)	NC_044998.1	5385538	9865	0.181238
(4948671,4957523)(5390539,5400538)(5390539,5400539)	NC_044998.1	5395539	8854	0.184524
(4957525,4966975)(5400540,5410539)(5400540,5410540)	NC_044998.1	5405540	9452	0.190401
(4966977,4976066)(5410541,5420540)(5410541,5420541)	NC_044998.1	5415541	9091	0.226249
(4976068,4985621)(5420542,5430541)(5420542,5430542)	NC_044998.1	5425542	9555	0.203318
(4985623,4994992)(5430543,5440542)(5430543,5440543)	NC_044998.1	5435543	9371	0.290572
(4994994,5004835)(5440544,5450543)(5440544,5450544)	NC_044998.1	5445544	9843	0.229445
(5004837,5014622)(5450545,5460544)(5450545,5460545)	NC_044998.1	5455545	9787	0.175282
(5014624,5023842)(5460546,5470545)(5460546,5470546)	NC_044998.1	5465546	9220	0.153909
(5023844,5033658)(5470547,5480546)(5470547,5480547)	NC_044998.1	5475547	9816	0.164886
(5033660,5042634)(5480548,5490547)(5480548,5490548)	NC_044998.1	5485548	8976	0.134772
(5042636,5050963)(5490549,5500548)(5490549,5500549)	NC_044998.1	5495549	8329	0.14802
(5050965,5060283)(5500550,5510549)(5500550,5510550)	NC_044998.1	5505550	9320	0.239394
(5060285,5069571)(5510551,5520550)(5510551,5520551)	NC_044998.1	5515551	9288	0.22637
(5069573,5079469)(5520552,5530551)(5520552,5530552)	NC_044998.1	5525552	9898	0.191922
(5079471,5089263)(5530553,5540552)(5530553,5540553)	NC_044998.1	5535553	9794	0.182051
(5089265,5097945)(5540554,5550553)(5540554,5550554)	NC_044998.1	5545554	8682	0.175894
(5097947,5106085)(5550555,5559301)(5550555,5560555)	NC_044998.1	5555555	8140	0.15265
(5106086,5115145)(5561239,5570555)(5560556,5570556)	NC_044998.1	5565556	9061	0.126733
(5115147,5124806)(5570557,5580556)(5570557,5580557)	NC_044998.1	5575557	9661	0.227491
(5124808,5134554)(5580558,5590557)(5580558,5590558)	NC_044998.1	5585558	9748	0.163061
(5134556,5144163)(5590559,5600558)(5590559,5600559)	NC_044998.1	5595559	9609	0.18324
(5144165,5152433)(5600560,5608958)(5600560,5610560)	NC_044998.1	5605560	8270	0.134741
(5152434,5162101)(5610746,5620560)(5610561,5620561)	NC_044998.1	5615561	9669	0.226793
(5162103,5171646)(5620562,5630561)(5620562,5630562)	NC_044998.1	5625562	9545	0.217422
(5171648,5181542)(5630563,5640562)(5630563,5640563)	NC_044998.1	5635563	9896	0.271052
(5181544,5191016)(5640564,5650563)(5640564,5650564)	NC_044998.1	5645564	9474	0.223221
(5191018,5200664)(5650565,5660564)(5650565,5660565)	NC_044998.1	5655565	9648	0.247373
(5200666,5210407)(5660566,5670565)(5660566,5670566)	NC_044998.1	5665566	9743	0.163363
(5210409,5220243)(5670567,5680566)(5670567,5680567)	NC_044998.1	5675567	9836	0.220811
(5220245,5230069)(5680568,5690567)(5680568,5690568)	NC_044998.1	5685568	9826	0.296966
(5230071,5239672)(5690569,5700568)(5690569,5700569)	NC_044998.1	5695569	9603	0.201044
(5239674,5249254)(5700570,5710569)(5700570,5710570)	NC_044998.1	5705570	9582	0.282847
(5249256,5259124)(5710571,5720570)(5710571,5720571)	NC_044998.1	5715571	9870	0.268629
(5259126,5268450)(5720572,5730571)(5720572,5730572)	NC_044998.1	5725572	9326	0.392156
(5268452,5278161)(5730573,5740572)(5730573,5740573)	NC_044998.1	5735573	9711	0.213415
(5278163,5287616)(5740574,5750573)(5740574,5750574)	NC_044998.1	5745574	9455	0.283046
(5287618,5296850)(5750575,5760574)(5750575,5760575)	NC_044998.1	5755575	9234	0.16377
(5296852,5306375)(5760576,5770575)(5760576,5770576)	NC_044998.1	5765576	9525	0.257597
(5306377,5316275)(5770577,5780576)(5770577,5780577)	NC_044998.1	5775577	9900	0.248827
(5316277,5325969)(5780578,5790577)(5780578,5790578)	NC_044998.1	5785578	9694	0.281654
(5325971,5335519)(5790579,5800578)(5790579,5800579)	NC_044998.1	5795579	9550	0.217283
(5335521,5345242)(5800580,5810579)(5800580,5810580)	NC_044998.1	5805580	9723	0.298564
(5345244,5355067)(5810581,5820580)(5810581,5820581)	NC_044998.1	5815581	9825	0.197643
(5355069,5364876)(5820582,5830581)(5820582,5830582)	NC_044998.1	5825582	9809	0.249443
(5364878,5373833)(5830583,5840582)(5830583,5840583)	NC_044998.1	5835583	8957	0.283495
(5373835,5383377)(5840584,5850583)(5840584,5850584)	NC_044998.1	5845584	9544	0.199017
(5383379,5393251)(5850585,5860584)(5850585,5860585)	NC_044998.1	5855585	9874	0.262803
(5393253,5403113)(5860586,5870585)(5860586,5870586)	NC_044998.1	5865586	9862	0.253843
(5403115,5412899)(5870587,5880586)(5870587,5880587)	NC_044998.1	5875587	9786	0.329537
(5412901,5422830)(5880588,5890587)(5880588,5890588)	NC_044998.1	5885588	9931	0.301651
(5422832,5432764)(5890589,5900588)(5890589,5900589)	NC_044998.1	5895589	9934	0.25332
(5432766,5440257)(5900590,5910589)(5900590,5910590)	NC_044998.1	5905590	7493	0.202857
(5440259,5449743)(5910591,5920590)(5910591,5920591)	NC_044998.1	5915591	9486	0.297142
(5449745,5459483)(5920592,5930591)(5920592,5930592)	NC_044998.1	5925592	9740	0.294619
(5459485,5469240)(5930593,5940592)(5930593,5940593)	NC_044998.1	5935593	9757	0.225222
(5469242,5476410)(5940594,5950593)(5940594,5950594)	NC_044998.1	5945594	7170	0.325493
(5476412,5486325)(5950595,5960594)(5950595,5960595)	NC_044998.1	5955595	9915	0.182222
(5486327,5495886)(5960596,5970595)(5960596,5970596)	NC_044998.1	5965596	9561	0.232804
(5495888,5505451)(5970597,5980596)(5970597,5980597)	NC_044998.1	5975597	9565	0.23794
(5505453,5514774)(5980598,5990597)(5980598,5990598)	NC_044998.1	5985598	9323	0.188667
(5514776,5524694)(5990599,6000598)(5990599,6000599)	NC_044998.1	5995599	9920	0.260628
(5524696,5534538)(6000600,6010599)(6000600,6010600)	NC_044998.1	6005600	9844	0.281416
(5534540,5543056)(6010601,6020600)(6010601,6020601)	NC_044998.1	6015601	8518	0.466882
(5543058,5551960)(6020602,6030601)(6020602,6030602)	NC_044998.1	6025602	8904	0.170132
(5551962,5560115)(6030603,6040602)(6030603,6040603)	NC_044998.1	6035603	8155	0.112305
(5560117,5569777)(6040604,6050603)(6040604,6050604)	NC_044998.1	6045604	9662	0.157735
(5569779,5579468)(6050605,6060604)(6050605,6060605)	NC_044998.1	6055605	9691	0.204766
(5579470,5589357)(6060606,6070605)(6060606,6070606)	NC_044998.1	6065606	9889	0.263453
(5589359,5599205)(6070607,6080606)(6070607,6080607)	NC_044998.1	6075607	9848	0.216137
(5599207,5609054)(6080608,6090607)(6080608,6090608)	NC_044998.1	6085608	9849	0.165087
(5609056,5618686)(6090609,6100608)(6090609,6100609)	NC_044998.1	6095609	9632	0.154276
(5618688,5628062)(6100610,6110609)(6100610,6110610)	NC_044998.1	6105610	9376	0.158117
(5628064,5637713)(6110611,6120610)(6110611,6120611)	NC_044998.1	6115611	9651	0.153121
(5637715,5647228)(6120612,6130611)(6120612,6130612)	NC_044998.1	6125612	9515	0.25012
(5647230,5656413)(6130613,6140260)(6130613,6140613)	NC_044998.1	6135613	9185	0.124374
(5656414,5666275)(6140667,6150613)(6140614,6150614)	NC_044998.1	6145614	9863	0.171319
(5666277,5676118)(6150615,6160614)(6150615,6160615)	NC_044998.1	6155615	9843	0.22146
(5676120,5686051)(6160616,6170615)(6160616,6170616)	NC_044998.1	6165616	9933	0.161977
(5686053,5695890)(6170617,6180616)(6170617,6180617)	NC_044998.1	6175617	9839	0.314245
(5695892,5704622)(6180618,6190617)(6180618,6190618)	NC_044998.1	6185618	8732	0.283645
(5704624,5714331)(6190619,6200618)(6190619,6200619)	NC_044998.1	6195619	9709	0.216906
(5714333,5722255)(6200620,6210619)(6200620,6210620)	NC_044998.1	6205620	7924	0.122011
(5722257,5731867)(6210621,6220620)(6210621,6220621)	NC_044998.1	6215621	9612	0.193262
(5731869,5741732)(6220622,6230621)(6220622,6230622)	NC_044998.1	6225622	9865	0.260763
(5741734,5750863)(6230623,6240622)(6230623,6240623)	NC_044998.1	6235623	9131	0.227599
(5750865,5758951)(6240624,6250623)(6240624,6250624)	NC_044998.1	6245624	8088	0.194993
(5758953,5768500)(6250625,6260624)(6250625,6260625)	NC_044998.1	6255625	9549	0.248731
(5768502,5778410)(6260626,6270625)(6260626,6270626)	NC_044998.1	6265626	9910	0.182963
(5778412,5788214)(6270627,6280626)(6270627,6280627)	NC_044998.1	6275627	9804	0.187865
(5788216,5798139)(6280628,6290627)(6280628,6290628)	NC_044998.1	6285628	9925	0.16389
(5798141,5807907)(6290629,6300628)(6290629,6300629)	NC_044998.1	6295629	9768	0.180856
(5807909,5817561)(6300630,6310629)(6300630,6310630)	NC_044998.1	6305630	9654	0.207761
(5817563,5827465)(6310631,6320630)(6310631,6320631)	NC_044998.1	6315631	9904	0.167039
(5827467,5837384)(6320632,6330631)(6320632,6330632)	NC_044998.1	6325632	9919	0.296109
(5837386,5847284)(6330633,6340632)(6330633,6340633)	NC_044998.1	6335633	9900	0.270618
(5847286,5856593)(6340634,6350633)(6340634,6350634)	NC_044998.1	6345634	9309	0.225602
(5856595,5866006)(6350635,6360634)(6350635,6360635)	NC_044998.1	6355635	9413	0.195205
(5866008,5875780)(6360636,6370635)(6360636,6370636)	NC_044998.1	6365636	9774	0.241654
(5875782,5885207)(6370637,6380546)(6370637,6380637)	NC_044998.1	6375637	9427	0.24033
(5885208,5894405)(6380652,6390637)(6380638,6390638)	NC_044998.1	6385638	9199	0.415542
(5894407,5903776)(6390639,6400638)(6390639,6400639)	NC_044998.1	6395639	9371	0.180965
(5903778,5913694)(6400640,6410639)(6400640,6410640)	NC_044998.1	6405640	9918	0.252666
(5913696,5922461)(6410641,6420640)(6410641,6420641)	NC_044998.1	6415641	8767	0.223165
(5922463,5932362)(6420642,6430641)(6420642,6430642)	NC_044998.1	6425642	9901	0.185169
(5932364,5942043)(6430643,6440642)(6430643,6440643)	NC_044998.1	6435643	9681	0.236912
(5942045,5951188)(6440644,6450643)(6440644,6450644)	NC_044998.1	6445644	9145	0.249014
(5951190,5961076)(6450645,6460644)(6450645,6460645)	NC_044998.1	6455645	9888	0.228176
(5961078,5969946)(6460646,6470645)(6460646,6470646)	NC_044998.1	6465646	8870	0.200225
(5969948,5979587)(6470647,6480646)(6470647,6480647)	NC_044998.1	6475647	9641	0.206464
(5979589,5989389)(6480648,6490647)(6480648,6490648)	NC_044998.1	6485648	9802	0.187837
(5989391,5999094)(6490649,6500648)(6490649,6500649)	NC_044998.1	6495649	9705	0.177544
(5999096,6008818)(6500650,6510649)(6500650,6510650)	NC_044998.1	6505650	9724	0.186599
(6008820,6018589)(6510651,6520650)(6510651,6520651)	NC_044998.1	6515651	9771	0.249626
(6018591,6027815)(6520652,6530651)(6520652,6530652)	NC_044998.1	6525652	9226	0.258216
(6027817,6037353)(6530653,6540652)(6530653,6540653)	NC_044998.1	6535653	9538	0.227241
(6037355,6046937)(6540654,6550653)(6540654,6550654)	NC_044998.1	6545654	9584	0.160463
(6046939,6056622)(6550655,6560654)(6550655,6560655)	NC_044998.1	6555655	9685	0.182657
(6056624,6066260)(6560656,6570655)(6560656,6570656)	NC_044998.1	6565656	9638	0.238743
(6066262,6076055)(6570657,6580656)(6570657,6580657)	NC_044998.1	6575657	9795	0.227234
(6076057,6085887)(6580658,6590657)(6580658,6590658)	NC_044998.1	6585658	9832	0.23086
(6085889,6095028)(6590659,6600658)(6590659,6600659)	NC_044998.1	6595659	9141	0.186765
(6095030,6104826)(6600660,6610659)(6600660,6610660)	NC_044998.1	6605660	9798	0.185505
(6104828,6114344)(6610661,6620660)(6610661,6620661)	NC_044998.1	6615661	9518	0.174458
(6114346,6124173)(6620662,6630661)(6620662,6630662)	NC_044998.1	6625662	9829	0.207547
(6124175,6133358)(6630663,6640662)(6630663,6640663)	NC_044998.1	6635663	9185	0.194316
(6133360,6143056)(6640664,6650663)(6640664,6650664)	NC_044998.1	6645664	9698	0.182524
(6143058,6152386)(6650665,6660664)(6650665,6660665)	NC_044998.1	6655665	9330	0.255421
(6152388,6161981)(6660666,6670665)(6660666,6670666)	NC_044998.1	6665666	9595	0.210678
(6161983,6171390)(6670667,6680666)(6670667,6680667)	NC_044998.1	6675667	9409	0.217204
(6171392,6180422)(6680668,6690667)(6680668,6690668)	NC_044998.1	6685668	9032	0.200335
(6180424,6189245)(6690669,6700668)(6690669,6700669)	NC_044998.1	6695669	8823	0.244058
(6189247,6199013)(6700670,6710669)(6700670,6710670)	NC_044998.1	6705670	9768	0.18055
(6199015,6208223)(6710671,6720670)(6710671,6720671)	NC_044998.1	6715671	9210	0.249821
(6208225,6216957)(6720672,6730671)(6720672,6730672)	NC_044998.1	6725672	8734	0.254217
(6216959,6226461)(6730673,6740672)(6730673,6740673)	NC_044998.1	6735673	9504	0.232977
(6226463,6235653)(6740674,6750673)(6740674,6750674)	NC_044998.1	6745674	9192	0.215324
(6235655,6245181)(6750675,6760674)(6750675,6760675)	NC_044998.1	6755675	9528	0.15046
(6245183,6254620)(6760676,6770675)(6760676,6770676)	NC_044998.1	6765676	9439	0.126609
(6254622,6264465)(6770677,6780676)(6770677,6780677)	NC_044998.1	6775677	9845	0.200451
(6264467,6273766)(6780678,6790677)(6780678,6790678)	NC_044998.1	6785678	9301	0.2181
(6273768,6283592)(6790679,6800678)(6790679,6800679)	NC_044998.1	6795679	9826	0.261125
(6283594,6293364)(6800680,6810679)(6800680,6810680)	NC_044998.1	6805680	9772	0.154522
(6293366,6302337)(6810681,6820680)(6810681,6820681)	NC_044998.1	6815681	8973	0.117207
(6302339,6311602)(6820682,6830681)(6820682,6830682)	NC_044998.1	6825682	9265	0.15312
(6311604,6321404)(6830683,6840682)(6830683,6840683)	NC_044998.1	6835683	9802	0.252685
(6321406,6330483)(6840684,6850683)(6840684,6850684)	NC_044998.1	6845684	9079	0.123534
(6330485,6340420)(6850685,6860684)(6850685,6860685)	NC_044998.1	6855685	9937	0.127648
(6340422,6349458)(6860686,6870685)(6860686,6870686)	NC_044998.1	6865686	9038	0.104648
(6349460,6358766)(6870687,6880686)(6870687,6880687)	NC_044998.1	6875687	9308	0.152441
(6358768,6368490)(6880697,6890687)(6880688,6890688)	NC_044998.1	6885688	9724	0.137557
(6368492,6378272)(6890689,6900688)(6890689,6900689)	NC_044998.1	6895689	9782	0.108705
(6378274,6387957)(6900690,6910689)(6900690,6910690)	NC_044998.1	6905690	9685	0.160171
(6387959,6397862)(6910691,6920690)(6910691,6920691)	NC_044998.1	6915691	9905	0.246178
(6397864,6407709)(6920692,6930691)(6920692,6930692)	NC_044998.1	6925692	9847	0.164954
(6407711,6417343)(6930693,6940692)(6930693,6940693)	NC_044998.1	6935693	9634	0.194577
(6417345,6426966)(6940694,6950693)(6940694,6950694)	NC_044998.1	6945694	9623	0.110461
(6426968,6436402)(6950695,6960694)(6950695,6960695)	NC_044998.1	6955695	9436	0.17495
(6436404,6446059)(6960696,6970695)(6960696,6970696)	NC_044998.1	6965696	9657	0.174814
(6446061,6455789)(6970697,6980696)(6970697,6980697)	NC_044998.1	6975697	9730	0.131357
(6455791,6465551)(6980698,6990697)(6980698,6990698)	NC_044998.1	6985698	9762	0.187319
(6465553,6475435)(6990699,7000698)(6990699,7000699)	NC_044998.1	6995699	9884	0.248349
(6475437,6485274)(7000700,7010699)(7000700,7010700)	NC_044998.1	7005700	9839	0.159035
(6485276,6495099)(7010701,7020700)(7010701,7020701)	NC_044998.1	7015701	9825	0.145432
(6495101,6503849)(7020702,7030701)(7020702,7030702)	NC_044998.1	7025702	8750	0.138166
(6503851,6513597)(7030703,7040702)(7030703,7040703)	NC_044998.1	7035703	9748	0.170259
(6513599,6523353)(7040704,7050703)(7040704,7050704)	NC_044998.1	7045704	9756	0.127692
(6523355,6533033)(7050705,7060704)(7050705,7060705)	NC_044998.1	7055705	9680	0.179293
(6533035,6542565)(7060706,7070705)(7060706,7070706)	NC_044998.1	7065706	9532	0.10799
(6542567,6552386)(7070707,7080706)(7070707,7080707)	NC_044998.1	7075707	9821	0.188723
(6552388,6562236)(7080708,7090707)(7080708,7090708)	NC_044998.1	7085708	9850	0.171479
(6562238,6571872)(7090709,7100708)(7090709,7100709)	NC_044998.1	7095709	9636	0.191334
(6571874,6581213)(7100710,7110709)(7100710,7110710)	NC_044998.1	7105710	9341	0.145958
(6581215,6591071)(7110711,7120710)(7110711,7120711)	NC_044998.1	7115711	9858	0.347259
(6591073,6600851)(7120712,7130711)(7120712,7130712)	NC_044998.1	7125712	9780	0.218732
(6600853,6609252)(7130713,7140712)(7130713,7140713)	NC_044998.1	7135713	8401	0.168752
(6609254,6618156)(7140714,7150713)(7140714,7150714)	NC_044998.1	7145714	8904	0.134362
(6618158,6627962)(7150715,7160714)(7150715,7160715)	NC_044998.1	7155715	9806	0.269681
(6627964,6637154)(7160716,7170715)(7160716,7170716)	NC_044998.1	7165716	9192	0.151788
(6637156,6646983)(7170717,7180716)(7170717,7180717)	NC_044998.1	7175717	9829	0.142294
(6646985,6656342)(7180718,7190717)(7180718,7190718)	NC_044998.1	7185718	9359	0.158053
(6656344,6666148)(7190719,7200718)(7190719,7200719)	NC_044998.1	7195719	9806	0.163604
(6666150,6675957)(7200720,7210719)(7200720,7210720)	NC_044998.1	7205720	9809	0.230573
(6675959,6681113)(7210721,7215993)(7210721,7220721)	NC_044998.1	7215721	5156	0.247453
(6681114,6688509)(7223101,7230721)(7220722,7230722)	NC_044998.1	7225722	7397	0.260856
(6688511,6697925)(7230723,7240722)(7230723,7240723)	NC_044998.1	7235723	9416	0.165336
(6697927,6706654)(7240724,7250723)(7240724,7250724)	NC_044998.1	7245724	8729	0.237936
(6706656,6715932)(7250725,7260724)(7250725,7260725)	NC_044998.1	7255725	9278	0.147491
(6715934,6725495)(7260726,7270725)(7260726,7270726)	NC_044998.1	7265726	9563	0.200936
(6725497,6735395)(7270727,7280726)(7270727,7280727)	NC_044998.1	7275727	9900	0.237751
(6735396,6745204)(7280728,7290727)(7280728,7290728)	NC_044998.1	7285728	9810	0.17756
(6745206,6753986)(7290729,7300728)(7290729,7300729)	NC_044998.1	7295729	8782	0.181975
(6753988,6763763)(7300730,7310729)(7300730,7310730)	NC_044998.1	7305730	9777	0.264388
(6763765,6772948)(7310731,7320730)(7310731,7320731)	NC_044998.1	7315731	9185	0.186039
(6772950,6782868)(7320732,7330731)(7320732,7330732)	NC_044998.1	7325732	9920	0.166881
(6782870,6792666)(7330733,7340732)(7330733,7340733)	NC_044998.1	7335733	9798	0.111566
(6792668,6802450)(7340734,7350733)(7340734,7350734)	NC_044998.1	7345734	9784	0.20542
(6802452,6812102)(7350735,7360734)(7350735,7360735)	NC_044998.1	7355735	9652	0.215574
(6812104,6822066)(7360736,7370735)(7360736,7370736)	NC_044998.1	7365736	9964	0.156955
(6822068,6831692)(7370737,7380736)(7370737,7380737)	NC_044998.1	7375737	9626	0.271422
(6831694,6841422)(7380738,7390737)(7380738,7390738)	NC_044998.1	7385738	9730	0.265603
(6841424,6850535)(7390739,7400738)(7390739,7400739)	NC_044998.1	7395739	9113	0.234466
(6850537,6860292)(7400740,7410739)(7400740,7410740)	NC_044998.1	7405740	9757	0.207034
(6860294,6869195)(7410741,7420740)(7410741,7420741)	NC_044998.1	7415741	8903	0.16141
(6869197,6878258)(7420742,7430741)(7420742,7430742)	NC_044998.1	7425742	9063	0.172905
(6878260,6887906)(7430743,7440742)(7430743,7440743)	NC_044998.1	7435743	9648	0.203238
(6887908,6895653)(7440744,7450530)(7440744,7450744)	NC_044998.1	7445744	7747	0.127962
(6895654,6900710)(7451725,7460744)(7450745,7460745)	NC_044998.1	7455745	5058	0.141148
(6900712,6909212)(7460746,7470745)(7460746,7470746)	NC_044998.1	7465746	8502	0.141165
(6909214,6919117)(7470747,7480746)(7470747,7480747)	NC_044998.1	7475747	9905	0.152686
(6919119,6928921)(7480748,7490747)(7480748,7490748)	NC_044998.1	7485748	9804	0.14647
(6928923,6938839)(7490749,7500748)(7490749,7500749)	NC_044998.1	7495749	9918	0.170649
(6938841,6948670)(7500750,7510749)(7500750,7510750)	NC_044998.1	7505750	9831	0.153255
(6948672,6958207)(7510751,7520750)(7510751,7520751)	NC_044998.1	7515751	9537	0.128674
(6958209,6967443)(7520752,7530751)(7520752,7530752)	NC_044998.1	7525752	9236	0.147368
(6967445,6977140)(7530753,7540752)(7530753,7540753)	NC_044998.1	7535753	9697	0.117779
(6977142,6985986)(7540754,7550753)(7540754,7550754)	NC_044998.1	7545754	8846	0.123563
(6985988,6995505)(7550755,7560754)(7550755,7560755)	NC_044998.1	7555755	9519	0.107366
(6995507,7005396)(7560756,7570755)(7560756,7570756)	NC_044998.1	7565756	9891	0.148123
(7005398,7013124)(7570757,7580756)(7570757,7580757)	NC_044998.1	7575757	7728	0.124357
(7013126,7022509)(7580758,7590757)(7580758,7590758)	NC_044998.1	7585758	9385	0.172437
(7022511,7031513)(7590759,7600758)(7590759,7600759)	NC_044998.1	7595759	9004	0.184233
(7031515,7041416)(7600760,7610759)(7600760,7610760)	NC_044998.1	7605760	9903	0.125276
(7041418,7051323)(7610761,7620760)(7610761,7620761)	NC_044998.1	7615761	9907	0.138815
(7051325,7061199)(7620762,7630761)(7620762,7630762)	NC_044998.1	7625762	9876	0.156064
(7061201,7071077)(7630763,7640762)(7630763,7640763)	NC_044998.1	7635763	9878	0.143038
(7071079,7080843)(7640764,7650763)(7640764,7650764)	NC_044998.1	7645764	9766	0.187032
(7080845,7090073)(7650765,7660764)(7650765,7660765)	NC_044998.1	7655765	9230	0.18681
(7090075,7099910)(7660766,7670751)(7660766,7670766)	NC_044998.1	7665766	9837	0.250607
(7099912,7109300)(7670767,7680766)(7670767,7680767)	NC_044998.1	7675767	9390	0.142433
(7109302,7118958)(7680768,7690767)(7680768,7690768)	NC_044998.1	7685768	9658	0.236616
(7118960,7128708)(7690769,7700768)(7690769,7700769)	NC_044998.1	7695769	9750	0.140639
(7128710,7138431)(7700770,7710769)(7700770,7710770)	NC_044998.1	7705770	9723	0.201324
(7138433,7148124)(7710771,7720770)(7710771,7720771)	NC_044998.1	7715771	9693	0.139458
(7148126,7157967)(7720772,7730771)(7720772,7730772)	NC_044998.1	7725772	9843	0.143823
(7157969,7167824)(7730773,7740772)(7730773,7740773)	NC_044998.1	7735773	9857	0.142916
(7167826,7177499)(7740774,7750773)(7740774,7750774)	NC_044998.1	7745774	9675	0.156743
(7177501,7187402)(7750775,7760774)(7750775,7760775)	NC_044998.1	7755775	9903	0.13754
(7187404,7197150)(7760776,7770775)(7760776,7770776)	NC_044998.1	7765776	9748	0.161687
(7197152,7207072)(7770777,7780776)(7770777,7780777)	NC_044998.1	7775777	9922	0.276282
(7207074,7216958)(7780778,7790777)(7780778,7790778)	NC_044998.1	7785778	9886	0.140875
(7216960,7226762)(7790779,7800778)(7790779,7800779)	NC_044998.1	7795779	9804	0.161426
(7226764,7236295)(7800780,7810779)(7800780,7810780)	NC_044998.1	7805780	9533	0.214962
(7236297,7245922)(7810781,7820780)(7810781,7820781)	NC_044998.1	7815781	9627	0.328595
(7245924,7255811)(7820782,7830781)(7820782,7830782)	NC_044998.1	7825782	9889	0.265245
(7255813,7265296)(7830783,7840782)(7830783,7840783)	NC_044998.1	7835783	9485	0.179734
(7265298,7275230)(7840784,7850783)(7840784,7850784)	NC_044998.1	7845784	9934	0.177049
(7275232,7285051)(7850785,7860784)(7850785,7860785)	NC_044998.1	7855785	9821	0.18383
(7285053,7294992)(7860786,7870785)(7860786,7870786)	NC_044998.1	7865786	9941	0.178815
(7294994,7304398)(7870787,7880786)(7870787,7880787)	NC_044998.1	7875787	9406	0.185373
(7304400,7314275)(7880788,7890787)(7880788,7890788)	NC_044998.1	7885788	9877	0.204547
(7314277,7323734)(7890789,7900788)(7890789,7900789)	NC_044998.1	7895789	9459	0.160332
(7323736,7333256)(7900790,7910789)(7900790,7910790)	NC_044998.1	7905790	9522	0.27401
(7333258,7343147)(7910791,7920790)(7910791,7920791)	NC_044998.1	7915791	9891	0.310161
(7343149,7352024)(7920792,7930791)(7920792,7930792)	NC_044998.1	7925792	8877	0.225822
(7352026,7361584)(7930793,7940792)(7930793,7940793)	NC_044998.1	7935793	9560	0.194964
(7361586,7371168)(7940794,7950793)(7940794,7950794)	NC_044998.1	7945794	9584	0.341231
(7371170,7380386)(7950795,7960794)(7950795,7960795)	NC_044998.1	7955795	9218	0.189626
(7380388,7390297)(7960796,7970795)(7960796,7970796)	NC_044998.1	7965796	9911	0.176763
(7390299,7399787)(7970797,7980796)(7970797,7980797)	NC_044998.1	7975797	9490	0.284756
(7399789,7409618)(7980798,7990797)(7980798,7990798)	NC_044998.1	7985798	9831	0.355555
(7409620,7419446)(7990799,8000798)(7990799,8000799)	NC_044998.1	7995799	9828	0.232858
(7419448,7429008)(8000800,8010799)(8000800,8010800)	NC_044998.1	8005800	9562	0.184068
(7429010,7438929)(8010801,8020800)(8010801,8020801)	NC_044998.1	8015801	9921	0.225485
(7438931,7448851)(8020802,8030801)(8020802,8030802)	NC_044998.1	8025802	9922	0.137493
(7448853,7458722)(8030803,8040802)(8030803,8040803)	NC_044998.1	8035803	9871	0.199442
(7458724,7468574)(8040804,8050803)(8040804,8050804)	NC_044998.1	8045804	9852	0.213481
(7468576,7478362)(8050805,8060804)(8050805,8060805)	NC_044998.1	8055805	9788	0.187355
(7478364,7488210)(8060806,8070805)(8060806,8070806)	NC_044998.1	8065806	9848	0.155606
(7488212,7497993)(8070807,8080806)(8070807,8080807)	NC_044998.1	8075807	9783	0.179126
(7497995,7507745)(8080808,8090807)(8080808,8090808)	NC_044998.1	8085808	9752	0.237463
(7507747,7516454)(8090809,8100808)(8090809,8100809)	NC_044998.1	8095809	8709	0.203258
(7516456,7526281)(8100810,8110809)(8100810,8110810)	NC_044998.1	8105810	9827	0.206427
(7526283,7536110)(8110811,8120810)(8110811,8120811)	NC_044998.1	8115811	9829	0.152019
(7536112,7545953)(8120812,8130811)(8120812,8130812)	NC_044998.1	8125812	9843	0.206932
(7545955,7555773)(8130813,8140812)(8130813,8140813)	NC_044998.1	8135813	9820	0.236635
(7555775,7565608)(8140814,8150813)(8140814,8150814)	NC_044998.1	8145814	9835	0.269557
(7565610,7575553)(8150815,8160814)(8150815,8160815)	NC_044998.1	8155815	9945	0.164592
(7575555,7585380)(8160816,8170815)(8160816,8170816)	NC_044998.1	8165816	9827	0.278123
(7585382,7595115)(8170817,8180816)(8170817,8180817)	NC_044998.1	8175817	9735	0.210447
(7595117,7604959)(8180818,8190817)(8180818,8190818)	NC_044998.1	8185818	9844	0.165821
(7604961,7614051)(8190819,8200818)(8190819,8200819)	NC_044998.1	8195819	9092	0.175203
(7614053,7623913)(8200820,8210819)(8200820,8210820)	NC_044998.1	8205820	9862	0.182683
(7623915,7633061)(8210821,8220820)(8210821,8220821)	NC_044998.1	8215821	9148	0.232474
(7633063,7642379)(8220822,8230607)(8220822,8230822)	NC_044998.1	8225822	9318	0.262793
(7642380,7651637)(8231233,8240822)(8230823,8240823)	NC_044998.1	8235823	9259	0.304737
(7651639,7661503)(8240824,8250823)(8240824,8250824)	NC_044998.1	8245824	9866	0.208918
(7661505,7670705)(8250825,8260824)(8250825,8260825)	NC_044998.1	8255825	9202	0.255133
(7670707,7680570)(8260826,8270825)(8260826,8270826)	NC_044998.1	8265826	9865	0.211757
(7680572,7690373)(8270827,8280826)(8270827,8280827)	NC_044998.1	8275827	9803	0.252924
(7690375,7700288)(8280828,8290827)(8280828,8290828)	NC_044998.1	8285828	9915	0.180273
(7700290,7709828)(8290829,8300828)(8290829,8300829)	NC_044998.1	8295829	9540	0.148387
(7709830,7719732)(8300830,8310829)(8300830,8310830)	NC_044998.1	8305830	9904	0.19027
(7719734,7729698)(8310831,8320830)(8310831,8320831)	NC_044998.1	8315831	9966	0.21245
(7729700,7739553)(8320832,8330831)(8320832,8330832)	NC_044998.1	8325832	9855	0.162428
(7739555,7749470)(8330833,8340832)(8330833,8340833)	NC_044998.1	8335833	9917	0.292041
(7749472,7759262)(8340834,8350833)(8340834,8350834)	NC_044998.1	8345834	9792	0.169996
(7759264,7768158)(8350835,8360492)(8350835,8360835)	NC_044998.1	8355835	8896	0.237072
(7768159,7777911)(8360858,8370835)(8360836,8370836)	NC_044998.1	8365836	9754	0.215676
(7777913,7787726)(8370837,8380836)(8370837,8380837)	NC_044998.1	8375837	9815	0.177599
(7787728,7797660)(8380838,8390837)(8380838,8390838)	NC_044998.1	8385838	9934	0.207247
(7797662,7807463)(8390839,8400838)(8390839,8400839)	NC_044998.1	8395839	9803	0.177974
(7807465,7816721)(8400840,8410839)(8400840,8410840)	NC_044998.1	8405840	9258	0.168965
(7816723,7826078)(8410841,8420840)(8410841,8420841)	NC_044998.1	8415841	9357	0.159778
(7826080,7835941)(8420842,8430841)(8420842,8430842)	NC_044998.1	8425842	9863	0.161921
(7835943,7845685)(8430843,8440842)(8430843,8440843)	NC_044998.1	8435843	9744	0.184376
(7845687,7855438)(8440844,8450843)(8440844,8450844)	NC_044998.1	8445844	9753	0.096373
(7855440,7865151)(8450845,8460844)(8450845,8460845)	NC_044998.1	8455845	9713	0.150521
(7865153,7875036)(8460846,8470845)(8460846,8470846)	NC_044998.1	8465846	9885	0.162485
(7875038,7884883)(8470847,8480841)(8470847,8480847)	NC_044998.1	8475847	9847	0.100352
(7884884,7894740)(8480861,8490847)(8480848,8490848)	NC_044998.1	8485848	9858	0.121794
(7894742,7904424)(8490849,8500848)(8490849,8500849)	NC_044998.1	8495849	9684	0.140683
(7904426,7914102)(8500850,8510849)(8500850,8510850)	NC_044998.1	8505850	9678	0.127321
(7914104,7924066)(8510851,8520850)(8510851,8520851)	NC_044998.1	8515851	9964	0.109097
(7924068,7933389)(8520852,8530851)(8520852,8530852)	NC_044998.1	8525852	9323	0.097349
(7933391,7943306)(8530853,8540852)(8530853,8540853)	NC_044998.1	8535853	9917	0.095783
(7943308,7952725)(8540854,8550853)(8540854,8550854)	NC_044998.1	8545854	9419	0.127671
(7952727,7961403)(8550855,8560854)(8550855,8560855)	NC_044998.1	8555855	8678	0.201899
(7961405,7971061)(8560856,8570847)(8560856,8570856)	NC_044998.1	8565856	9658	0.081184
(7971062,7980757)(8571059,8580856)(8570857,8580857)	NC_044998.1	8575857	9697	0.161085
(7980759,7990300)(8580858,8590857)(8580858,8590858)	NC_044998.1	8585858	9543	0.237606
(7990302,7999678)(8590859,8600858)(8590859,8600859)	NC_044998.1	8595859	9378	0.175806
(7999680,8009578)(8600860,8610859)(8600860,8610860)	NC_044998.1	8605860	9900	0.155627
(8009580,8019172)(8610861,8620860)(8610861,8620861)	NC_044998.1	8615861	9594	0.130915
(8019174,8028345)(8620862,8630861)(8620862,8630862)	NC_044998.1	8625862	9173	0.161798
(8028347,8038229)(8630863,8640862)(8630863,8640863)	NC_044998.1	8635863	9884	0.175968
(8038231,8048051)(8640864,8650863)(8640864,8650864)	NC_044998.1	8645864	9822	0.176057
(8048053,8057326)(8650865,8660864)(8650865,8660865)	NC_044998.1	8655865	9275	0.237818
(8057328,8067237)(8660866,8670865)(8660866,8670866)	NC_044998.1	8665866	9911	0.181402
(8067239,8076983)(8670867,8680866)(8670867,8680867)	NC_044998.1	8675867	9746	0.177175
(8076985,8086877)(8680868,8690867)(8680868,8690868)	NC_044998.1	8685868	9894	0.139426
(8086879,8096671)(8690869,8700868)(8690869,8700869)	NC_044998.1	8695869	9794	0.134112
(8096673,8106575)(8700870,8710869)(8700870,8710870)	NC_044998.1	8705870	9904	0.145194
(8106577,8109974)(8710871,8720542)(8710871,8720871)	NC_044998.1	8715871	3399	0.1242
(8109975,8119095)(8721654,8730871)(8720872,8730872)	NC_044998.1	8725872	9122	0.113043
(8119097,8128826)(8730873,8740872)(8730873,8740873)	NC_044998.1	8735873	9731	0.149146
(8128828,8138554)(8740874,8750873)(8740874,8750874)	NC_044998.1	8745874	9728	0.187199
(8138556,8148025)(8750875,8760874)(8750875,8760875)	NC_044998.1	8755875	9471	0.142168
(8148027,8157807)(8760876,8770875)(8760876,8770876)	NC_044998.1	8765876	9782	0.1153
(8157809,8167630)(8770877,8780876)(8770877,8780877)	NC_044998.1	8775877	9823	0.158896
(8167632,8177351)(8780878,8790877)(8780878,8790878)	NC_044998.1	8785878	9721	0.159606
(8177353,8187165)(8790879,8800878)(8790879,8800879)	NC_044998.1	8795879	9814	0.130487
(8187167,8197025)(8800880,8810879)(8800880,8810880)	NC_044998.1	8805880	9860	0.130408
(8197027,8206858)(8810881,8820880)(8810881,8820881)	NC_044998.1	8815881	9833	0.143258
(8206860,8216648)(8820882,8830811)(8820882,8830882)	NC_044998.1	8825882	9790	0.071546
(8216649,8226277)(8831083,8840882)(8830883,8840883)	NC_044998.1	8835883	9630	0.076158
(8226279,8235701)(8840884,8850883)(8840884,8850884)	NC_044998.1	8845884	9424	0.093112
(8235703,8245575)(8850885,8860884)(8850885,8860885)	NC_044998.1	8855885	9874	0.184517
(8245577,8255171)(8860886,8870885)(8860886,8870886)	NC_044998.1	8865886	9596	0.141244
(8255173,8265091)(8870887,8880886)(8870887,8880887)	NC_044998.1	8875887	9920	0.166665
(8265093,8274626)(8880888,8890887)(8880888,8890888)	NC_044998.1	8885888	9535	0.208566
(8274628,8284537)(8890889,8900888)(8890889,8900889)	NC_044998.1	8895889	9911	0.11849
(8284539,8294346)(8900890,8910889)(8900890,8910890)	NC_044998.1	8905890	9809	0.130807
(8294348,8304209)(8910891,8920890)(8910891,8920891)	NC_044998.1	8915891	9863	0.110199
(8304211,8314085)(8920892,8930891)(8920892,8930892)	NC_044998.1	8925892	9876	0.184841
(8314087,8323990)(8930893,8940892)(8930893,8940893)	NC_044998.1	8935893	9905	0.154035
(8323992,8333836)(8940894,8950893)(8940894,8950894)	NC_044998.1	8945894	9846	0.183778
(8333838,8343678)(8950895,8960894)(8950895,8960895)	NC_044998.1	8955895	9842	0.21962
(8343680,8353564)(8960896,8970895)(8960896,8970896)	NC_044998.1	8965896	9886	0.206007
(8353566,8363306)(8970897,8980896)(8970897,8980897)	NC_044998.1	8975897	9742	0.143655
(8363308,8372988)(8980898,8990897)(8980898,8990898)	NC_044998.1	8985898	9682	0.192172
(8372990,8382896)(8990899,9000898)(8990899,9000899)	NC_044998.1	8995899	9908	0.122399
(8382898,8392575)(9000900,9010899)(9000900,9010900)	NC_044998.1	9005900	9679	0.13831
(8392577,8402125)(9010901,9020538)(9010901,9020901)	NC_044998.1	9015901	9550	0.237285
(8402126,8411594)(9021159,9030901)(9020902,9030902)	NC_044998.1	9025902	9470	0.21547
(8411596,8421438)(9030903,9040902)(9030903,9040903)	NC_044998.1	9035903	9844	0.136176
(8421440,8431214)(9040904,9050903)(9040904,9050904)	NC_044998.1	9045904	9776	0.124946
(8431216,8441073)(9050905,9060904)(9050905,9060905)	NC_044998.1	9055905	9859	0.111384
(8441075,8450849)(9060906,9070904)(9060906,9070906)	NC_044998.1	9065906	9776	0.167754
(8450850,8460679)(9070907,9080906)(9070907,9080907)	NC_044998.1	9075907	9831	0.165609
(8460681,8470488)(9080908,9090907)(9080908,9090908)	NC_044998.1	9085908	9809	0.222228
(8470490,8480249)(9090909,9100908)(9090909,9100909)	NC_044998.1	9095909	9761	0.14438
(8480251,8490033)(9100910,9110909)(9100910,9110910)	NC_044998.1	9105910	9784	0.15013
(8490035,8499839)(9110911,9120910)(9110911,9120911)	NC_044998.1	9115911	9806	0.125275
(8499840,8509580)(9120912,9130911)(9120912,9130912)	NC_044998.1	9125912	9742	0.148076
(8509582,8519445)(9130913,9140912)(9130913,9140913)	NC_044998.1	9135913	9865	0.100597
(8519447,8529336)(9140914,9150913)(9140914,9150914)	NC_044998.1	9145914	9891	0.117188
(8529338,8539187)(9150915,9160914)(9150915,9160915)	NC_044998.1	9155915	9851	0.211481
(8539189,8549025)(9160916,9170915)(9160916,9170916)	NC_044998.1	9165916	9838	0.163132
(8549027,8558602)(9170917,9180916)(9170917,9180917)	NC_044998.1	9175917	9577	0.177109
(8558604,8568475)(9180918,9190917)(9180918,9190918)	NC_044998.1	9185918	9873	0.176439
(8568477,8578405)(9190919,9200918)(9190919,9200919)	NC_044998.1	9195919	9930	0.143166
(8578407,8588333)(9200920,9210919)(9200920,9210920)	NC_044998.1	9205920	9928	0.19845
(8588335,8598196)(9210921,9220920)(9210921,9220921)	NC_044998.1	9215921	9863	0.152576
(8598198,8608040)(9220922,9230921)(9220922,9230922)	NC_044998.1	9225922	9844	0.170744
(8608042,8617967)(9230923,9240922)(9230923,9240923)	NC_044998.1	9235923	9927	0.192499
(8617969,8627842)(9240924,9250923)(9240924,9250924)	NC_044998.1	9245924	9875	0.223738
(8627844,8637501)(9250925,9260924)(9250925,9260925)	NC_044998.1	9255925	9659	0.13867
(8637503,8646847)(9260926,9270925)(9260926,9270926)	NC_044998.1	9265926	9346	0.20592
(8646849,8656697)(9270927,9280926)(9270927,9280927)	NC_044998.1	9275927	9850	0.210568
(8656699,8666427)(9280928,9290927)(9280928,9290928)	NC_044998.1	9285928	9730	0.22974
(8666429,8675272)(9290929,9300928)(9290929,9300929)	NC_044998.1	9295929	8845	0.363548
(8675274,8685176)(9300930,9310929)(9300930,9310930)	NC_044998.1	9305930	9904	0.242359
(8685178,8695046)(9310931,9320930)(9310931,9320931)	NC_044998.1	9315931	9870	0.259258
(8695048,8704789)(9320932,9330931)(9320932,9330932)	NC_044998.1	9325932	9743	0.261065
(8704791,8713923)(9330933,9340932)(9330933,9340933)	NC_044998.1	9335933	9134	0.315535
(8713925,8723793)(9340934,9350933)(9340934,9350934)	NC_044998.1	9345934	9870	0.22224
(8723795,8733181)(9350935,9360934)(9350935,9360935)	NC_044998.1	9355935	9388	0.275198
(8733183,8743054)(9360936,9370935)(9360936,9370936)	NC_044998.1	9365936	9873	0.225177
(8743056,8752861)(9370937,9380936)(9370937,9380937)	NC_044998.1	9375937	9807	0.285815
(8752863,8762526)(9380938,9390937)(9380938,9390938)	NC_044998.1	9385938	9665	0.286254
(8762528,8772373)(9390939,9400938)(9390939,9400939)	NC_044998.1	9395939	9847	0.171012
(8772375,8782210)(9400940,9410939)(9400940,9410940)	NC_044998.1	9405940	9837	0.252476
(8782212,8792109)(9410941,9420940)(9410941,9420941)	NC_044998.1	9415941	9899	0.235125
(8792111,8802003)(9420942,9430941)(9420942,9430942)	NC_044998.1	9425942	9894	0.175715
(8802005,8811879)(9430943,9440942)(9430943,9440943)	NC_044998.1	9435943	9876	0.228268
(8811881,8821383)(9440944,9450943)(9440944,9450944)	NC_044998.1	9445944	9504	0.254216
(8821385,8831109)(9450945,9460944)(9450945,9460945)	NC_044998.1	9455945	9726	0.157628
(8831111,8840805)(9460946,9470945)(9460946,9470946)	NC_044998.1	9465946	9696	0.206771
(8840807,8850611)(9470947,9480946)(9470947,9480947)	NC_044998.1	9475947	9806	0.1884
(8850613,8860423)(9480948,9490947)(9480948,9490948)	NC_044998.1	9485948	9812	0.164767
(8860425,8870335)(9490949,9500948)(9490949,9500949)	NC_044998.1	9495949	9912	0.296098
(8870337,8870539)(9500950,9501152)(9500950,9510950)	NC_044998.1	9505950	204	0.001071
(8870540,8879183)(9512197,9520950)(9510951,9520951)	NC_044998.1	9515951	8645	0.299754
(8879185,8888925)(9520952,9530951)(9520952,9530952)	NC_044998.1	9525952	9742	0.210006
(8888927,8898722)(9530953,9540952)(9530953,9540953)	NC_044998.1	9535953	9797	0.202765
(8898724,8908451)(9540954,9550953)(9540954,9550954)	NC_044998.1	9545954	9729	0.193286
(8908453,8918257)(9550955,9560954)(9550955,9560955)	NC_044998.1	9555955	9806	0.151302
(8918259,8928061)(9560956,9570955)(9560956,9570956)	NC_044998.1	9565956	9804	0.263597
(8928063,8937900)(9570957,9580956)(9570957,9580957)	NC_044998.1	9575957	9839	0.225837
(8937902,8947461)(9580958,9590957)(9580958,9590958)	NC_044998.1	9585958	9561	0.180254
(8947463,8957146)(9590959,9600958)(9590959,9600959)	NC_044998.1	9595959	9685	0.19876
(8957148,8967085)(9600960,9610959)(9600960,9610960)	NC_044998.1	9605960	9939	0.154044
(8967087,8976969)(9610961,9620960)(9610961,9620961)	NC_044998.1	9615961	9884	0.182946
(8976971,8986881)(9620962,9630961)(9620962,9630962)	NC_044998.1	9625962	9912	0.167285
(8986883,8995879)(9630963,9640962)(9630963,9640963)	NC_044998.1	9635963	8998	0.155991
(8995881,9005724)(9640964,9650963)(9640964,9650964)	NC_044998.1	9645964	9845	0.154126
(9005726,9015653)(9650965,9660964)(9650965,9660965)	NC_044998.1	9655965	9929	0.203547
(9015655,9025087)(9660966,9670965)(9660966,9670966)	NC_044998.1	9665966	9434	0.216976
(9025089,9034471)(9670967,9680966)(9670967,9680967)	NC_044998.1	9675967	9384	0.156392
(9034473,9044372)(9680968,9690967)(9680968,9690968)	NC_044998.1	9685968	9901	0.173926
(9044374,9054277)(9690969,9700968)(9690969,9700969)	NC_044998.1	9695969	9905	0.135207
(9054278,9064206)(9700972,9710969)(9700970,9710970)	NC_044998.1	9705970	9930	0.105396
(9064208,9073149)(9710971,9720970)(9710971,9720971)	NC_044998.1	9715971	8943	0.112474
(9073151,9082970)(9720972,9730971)(9720972,9730972)	NC_044998.1	9725972	9821	0.082554
(9082972,9092822)(9730973,9740972)(9730973,9740973)	NC_044998.1	9735973	9852	0.096107
(9092824,9102680)(9740974,9750973)(9740974,9750974)	NC_044998.1	9745974	9858	0.146446
(9102682,9112371)(9750975,9760974)(9750975,9760975)	NC_044998.1	9755975	9691	0.179062
(9112373,9122267)(9760976,9770975)(9760976,9770976)	NC_044998.1	9765976	9896	0.120822
(9122269,9132043)(9770977,9780976)(9770977,9780977)	NC_044998.1	9775977	9776	0.152046
(9132045,9141687)(9780978,9790977)(9780978,9790978)	NC_044998.1	9785978	9644	0.150143
(9141689,9151632)(9790979,9800978)(9790979,9800979)	NC_044998.1	9795979	9945	0.244505
(9151634,9161534)(9800981,9810979)(9800980,9810980)	NC_044998.1	9805980	9902	0.138265
(9161536,9171313)(9810981,9820980)(9810981,9820981)	NC_044998.1	9815981	9779	0.122293
(9171315,9181170)(9820982,9830981)(9820982,9830982)	NC_044998.1	9825982	9857	0.082125
(9181172,9190608)(9830998,9840982)(9830983,9840983)	NC_044998.1	9835983	9438	0.113544
(9190610,9200351)(9840984,9850983)(9840984,9850984)	NC_044998.1	9845984	9743	0.110031
(9200353,9210145)(9850985,9860984)(9850985,9860985)	NC_044998.1	9855985	9794	0.134025
(9210147,9219832)(9860986,9870985)(9860986,9870986)	NC_044998.1	9865986	9687	0.125364
(9219834,9229711)(9870987,9880986)(9870987,9880987)	NC_044998.1	9875987	9879	0.16809
(9229713,9239489)(9880988,9890987)(9880988,9890988)	NC_044998.1	9885988	9778	0.138877
(9239491,9248015)(9890989,9900988)(9890989,9900989)	NC_044998.1	9895989	8526	0.090966
(9248017,9257554)(9900990,9910989)(9900990,9910990)	NC_044998.1	9905990	9539	0.122583
(9257556,9267476)(9910991,9920990)(9910991,9920991)	NC_044998.1	9915991	9922	0.103638
(9267478,9275834)(9920992,9930991)(9920992,9930992)	NC_044998.1	9925992	8358	0.165144
(9275836,9285754)(9930993,9940992)(9930993,9940993)	NC_044998.1	9935993	9920	0.150736
(9285756,9295378)(9940994,9950993)(9940994,9950994)	NC_044998.1	9945994	9624	0.123253
(9295380,9305306)(9950995,9960994)(9950995,9960995)	NC_044998.1	9955995	9928	0.196618
(9305308,9315160)(9960996,9970995)(9960996,9970996)	NC_044998.1	9965996	9854	0.124197
(9315162,9325090)(9970997,9980996)(9970997,9980997)	NC_044998.1	9975997	9930	0.13763
(9325092,9333892)(9980998,9990997)(9980998,9990998)	NC_044998.1	9985998	8802	0.114478
(9333894,9343768)(9990999,10000998)(9990999,10000999)	NC_044998.1	9995999	9876	0.103554
(9343770,9353687)(10001000,10010999)(10001000,10011000)	NC_044998.1	10006000	9919	0.102104
(9353689,9363412)(10011001,10021000)(10011001,10021001)	NC_044998.1	10016001	9725	0.121341
(9363414,9373093)(10021002,10031001)(10021002,10031002)	NC_044998.1	10026002	9681	0.119806
(9373095,9382517)(10031003,10041002)(10031003,10041003)	NC_044998.1	10036003	9424	0.144565
(9382519,9392381)(10041004,10051003)(10041004,10051004)	NC_044998.1	10046004	9864	0.142288
(9392383,9402170)(10051005,10061004)(10051005,10061005)	NC_044998.1	10056005	9789	0.111852
(9402172,9411972)(10061006,10071005)(10061006,10071006)	NC_044998.1	10066006	9802	0.134776
(9411974,9421871)(10071007,10081006)(10071007,10081007)	NC_044998.1	10076007	9899	0.138753
(9421873,9431805)(10081008,10091007)(10081008,10091008)	NC_044998.1	10086008	9934	0.169493
(9431807,9441584)(10091009,10101008)(10091009,10101009)	NC_044998.1	10096009	9779	0.181532
(9441586,9451442)(10101010,10111009)(10101010,10111010)	NC_044998.1	10106010	9858	0.099457
(9451444,9461366)(10111011,10121010)(10111011,10121011)	NC_044998.1	10116011	9924	0.106288
(9461368,9471314)(10121012,10131011)(10121012,10131012)	NC_044998.1	10126012	9948	0.200775
(9471316,9481071)(10131013,10141012)(10131013,10141013)	NC_044998.1	10136013	9757	0.126966
(9481073,9490704)(10141014,10151013)(10141014,10151014)	NC_044998.1	10146014	9633	0.064299
(9490706,9500597)(10151015,10161014)(10151015,10161015)	NC_044998.1	10156015	9893	0.157337
(9500599,9510433)(10161016,10171015)(10161016,10171016)	NC_044998.1	10166016	9836	0.140961
(9510435,9520184)(10171017,10181016)(10171017,10181017)	NC_044998.1	10176017	9751	0.164413
(9520186,9530116)(10181018,10191017)(10181018,10191018)	NC_044998.1	10186018	9932	0.131343
(9530118,9540007)(10191019,10201018)(10191019,10201019)	NC_044998.1	10196019	9891	0.132156
(9540009,9549934)(10201020,10211019)(10201020,10211020)	NC_044998.1	10206020	9927	0.095576
(9549936,9559747)(10211021,10221020)(10211021,10221021)	NC_044998.1	10216021	9813	0.189621
(9559749,9569567)(10221022,10231021)(10221022,10231022)	NC_044998.1	10226022	9820	0.173791
(9569569,9579469)(10231023,10241022)(10231023,10241023)	NC_044998.1	10236023	9902	0.172323
(9579471,9589262)(10241024,10251023)(10241024,10251024)	NC_044998.1	10246024	9793	0.207325
(9589264,9599168)(10251025,10261024)(10251025,10261025)	NC_044998.1	10256025	9906	0.210223
(9599170,9608977)(10261026,10271025)(10261026,10271026)	NC_044998.1	10266026	9809	0.213085
(9608979,9618584)(10271027,10281026)(10271027,10281027)	NC_044998.1	10276027	9607	0.11158
(9618586,9628426)(10281028,10291027)(10281028,10291028)	NC_044998.1	10286028	9842	0.122973
(9628428,9638307)(10291029,10301028)(10291029,10301029)	NC_044998.1	10296029	9881	0.148494
(9638309,9648230)(10301030,10311029)(10301030,10311030)	NC_044998.1	10306030	9923	0.152101
(9648232,9657952)(10311031,10321030)(10311031,10321031)	NC_044998.1	10316031	9722	0.172797
(9657954,9667860)(10321032,10331031)(10321032,10331032)	NC_044998.1	10326032	9908	0.188599
(9667862,9677344)(10331033,10341032)(10331033,10341033)	NC_044998.1	10336033	9484	0.167115
(9677346,9687191)(10341034,10351033)(10341034,10351034)	NC_044998.1	10346034	9847	0.157838
(9687193,9696893)(10351035,10361034)(10351035,10361035)	NC_044998.1	10356035	9702	0.171416
(9696895,9706524)(10361036,10371035)(10361036,10371036)	NC_044998.1	10366036	9631	0.181232
(9706526,9715742)(10371037,10381036)(10371037,10381037)	NC_044998.1	10376037	9218	0.132631
(9715744,9725349)(10381038,10391037)(10381038,10391038)	NC_044998.1	10386038	9607	0.086026
(9725351,9735153)(10391039,10401038)(10391039,10401039)	NC_044998.1	10396039	9804	0.121908
(9735154,9745028)(10401043,10411039)(10401040,10411040)	NC_044998.1	10406040	9876	0.166966
(9745030,9754402)(10411041,10421040)(10411041,10421041)	NC_044998.1	10416041	9374	0.108112
(9754404,9764165)(10421042,10431041)(10421042,10431042)	NC_044998.1	10426042	9763	0.163514
(9764167,9773776)(10431043,10441042)(10431043,10441043)	NC_044998.1	10436043	9611	0.14804
(9773778,9783469)(10441044,10451043)(10441044,10451044)	NC_044998.1	10446044	9693	0.0955
(9783471,9793266)(10451045,10461044)(10451045,10461045)	NC_044998.1	10456045	9797	0.126063
(9793268,9803038)(10461046,10471045)(10461046,10471046)	NC_044998.1	10466046	9772	0.146205
(9803040,9812964)(10471047,10481046)(10471047,10481047)	NC_044998.1	10476047	9926	0.126948
(9812966,9822541)(10481048,10491047)(10481048,10491048)	NC_044998.1	10486048	9577	0.121651
(9822543,9832478)(10491049,10501048)(10491049,10501049)	NC_044998.1	10496049	9937	0.084139
(9832480,9842344)(10501050,10511049)(10501050,10511050)	NC_044998.1	10506050	9866	0.166495
(9842346,9852037)(10511051,10521050)(10511051,10521051)	NC_044998.1	10516051	9693	0.109394
(9852039,9861841)(10521052,10531051)(10521052,10531052)	NC_044998.1	10526052	9804	0.093733
(9861843,9871775)(10531053,10541052)(10531053,10541053)	NC_044998.1	10536053	9934	0.113893
(9871777,9881699)(10541054,10551053)(10541054,10551054)	NC_044998.1	10546054	9924	0.19736
(9881701,9891582)(10551055,10561054)(10551055,10561055)	NC_044998.1	10556055	9883	0.176864
(9891584,9897663)(10561056,10569519)(10561056,10571056)	NC_044998.1	10566056	6081	0.09706
(9897664,9907157)(10571294,10581056)(10571057,10581057)	NC_044998.1	10576057	9495	0.155251
(9907159,9916981)(10581058,10591057)(10581058,10591058)	NC_044998.1	10586058	9824	0.124616
(9916983,9926748)(10591059,10601058)(10591059,10601059)	NC_044998.1	10596059	9767	0.17423
(9926750,9936309)(10601060,10611059)(10601060,10611060)	NC_044998.1	10606060	9561	0.131734
(9936311,9945898)(10611061,10621060)(10611061,10621061)	NC_044998.1	10616061	9589	0.15989
(9945900,9953050)(10621062,10628402)(10621062,10631062)	NC_044998.1	10626062	7152	0.188955
(9953051,9962647)(10631284,10641062)(10631063,10641063)	NC_044998.1	10636063	9598	0.145144
(9962649,9972460)(10641064,10651063)(10641064,10651064)	NC_044998.1	10646064	9813	0.072951
(9972462,9982212)(10651065,10661064)(10651065,10661065)	NC_044998.1	10656065	9752	0.142904
(9982214,9992060)(10661066,10671065)(10661066,10671066)	NC_044998.1	10666066	9848	0.17116
(9992062,10001925)(10671067,10681066)(10671067,10681067)	NC_044998.1	10676067	9865	0.189252
(10001927,10011751)(10681068,10691067)(10681068,10691068)	NC_044998.1	10686068	9826	0.200635
(10011753,10021542)(10691069,10701068)(10691069,10701069)	NC_044998.1	10696069	9791	0.151869
(10021544,10031370)(10701070,10711069)(10701070,10711070)	NC_044998.1	10706070	9828	0.139109
(10031372,10041184)(10711071,10721070)(10711071,10721071)	NC_044998.1	10716071	9814	0.087226
(10041186,10051056)(10721072,10731071)(10721072,10731072)	NC_044998.1	10726072	9872	0.150306
(10051058,10060819)(10731073,10741072)(10731073,10741073)	NC_044998.1	10736073	9763	0.094417
(10060821,10070442)(10741074,10751073)(10741074,10751074)	NC_044998.1	10746074	9623	0.179713
(10070444,10079326)(10751075,10761074)(10751075,10761075)	NC_044998.1	10756075	8884	0.098673
(10079328,10089158)(10761076,10771075)(10761076,10771076)	NC_044998.1	10766076	9832	0.087965
(10089160,10098016)(10771077,10781076)(10771077,10781077)	NC_044998.1	10776077	8858	0.129443
(10098018,10107312)(10781078,10791077)(10781078,10791078)	NC_044998.1	10786078	9296	0.18307
(10107314,10117051)(10791079,10801078)(10791079,10801079)	NC_044998.1	10796079	9739	0.21934
(10117053,10126888)(10801080,10811079)(10801080,10811080)	NC_044998.1	10806080	9837	0.166305
(10126890,10136565)(10811081,10821080)(10811081,10821081)	NC_044998.1	10816081	9677	0.143664
(10136567,10146265)(10821082,10831081)(10821082,10831082)	NC_044998.1	10826082	9700	0.147211
(10146267,10156111)(10831083,10841082)(10831083,10841083)	NC_044998.1	10836083	9846	0.101439
(10156113,10165985)(10841084,10851083)(10841084,10851084)	NC_044998.1	10846084	9874	0.214231
(10165987,10175421)(10851085,10861084)(10851085,10861085)	NC_044998.1	10856085	9436	0.1665
(10175423,10185151)(10861086,10871085)(10861086,10871086)	NC_044998.1	10866086	9730	0.206725
(10185153,10194599)(10871087,10881086)(10871087,10881087)	NC_044998.1	10876087	9448	0.22607
(10194601,10204191)(10881088,10891087)(10881088,10891088)	NC_044998.1	10886088	9592	0.18876
(10204193,10213058)(10891089,10901088)(10891089,10901089)	NC_044998.1	10896089	8867	0.133149
(10213060,10222942)(10901090,10911089)(10901090,10911090)	NC_044998.1	10906090	9884	0.127301
(10222944,10232757)(10911091,10921090)(10911091,10921091)	NC_044998.1	10916091	9815	0.174874
(10232759,10242472)(10921092,10931091)(10921092,10931092)	NC_044998.1	10926092	9715	0.147418
(10242474,10250974)(10931093,10941021)(10931093,10941093)	NC_044998.1	10936093	8502	0.151551
(10250975,10260572)(10941333,10951093)(10941094,10951094)	NC_044998.1	10946094	9599	0.192864
(10260574,10270389)(10951095,10961094)(10951095,10961095)	NC_044998.1	10956095	9817	0.154188
(10270391,10279860)(10961096,10971095)(10961096,10971096)	NC_044998.1	10966096	9471	0.186881
(10279862,10289441)(10971097,10981096)(10971097,10981097)	NC_044998.1	10976097	9581	0.172027
(10289443,10299316)(10981098,10991097)(10981098,10991098)	NC_044998.1	10986098	9875	0.145078
(10299318,10308972)(10991099,11001098)(10991099,11001099)	NC_044998.1	10996099	9656	0.164856
(10308974,10318387)(11001100,11011099)(11001100,11011100)	NC_044998.1	11006100	9415	0.169769
(10318389,10328278)(11011101,11021100)(11011101,11021101)	NC_044998.1	11016101	9891	0.137014
(10328280,10337810)(11021102,11031101)(11021102,11031102)	NC_044998.1	11026102	9532	0.125187
(10337812,10347334)(11031103,11041102)(11031103,11041103)	NC_044998.1	11036103	9524	0.219916
(10347336,10356901)(11041104,11051103)(11041104,11051104)	NC_044998.1	11046104	9567	0.164198
(10356903,10366419)(11051105,11061104)(11051105,11061105)	NC_044998.1	11056105	9518	0.19693
(10366421,10376187)(11061106,11071105)(11061106,11071106)	NC_044998.1	11066106	9768	0.140998
(10376189,10385740)(11071107,11081106)(11071107,11081107)	NC_044998.1	11076107	9553	0.196972
(10385742,10394952)(11081108,11091107)(11081108,11091108)	NC_044998.1	11086108	9212	0.201904
(10394954,10404287)(11091109,11101108)(11091109,11101109)	NC_044998.1	11096109	9335	0.145531
(10404289,10413627)(11101110,11111109)(11101110,11111110)	NC_044998.1	11106110	9340	0.184244
(10413629,10422825)(11111111,11121110)(11111111,11121111)	NC_044998.1	11116111	9198	0.144211
(10422827,10432594)(11121112,11131111)(11121112,11131112)	NC_044998.1	11126112	9769	0.110603
(10432596,10442333)(11131113,11141112)(11131113,11141113)	NC_044998.1	11136113	9739	0.150736
(10442335,10452092)(11141114,11151113)(11141114,11151114)	NC_044998.1	11146114	9759	0.19377
(10452094,10461967)(11151115,11161114)(11151115,11161115)	NC_044998.1	11156115	9875	0.154204
(10461969,10471514)(11161116,11171115)(11161116,11171116)	NC_044998.1	11166116	9547	0.131412
(10471515,10481021)(11171123,11181116)(11171117,11181117)	NC_044998.1	11176117	9508	0.088708
(10481023,10490675)(11181118,11191117)(11181118,11191118)	NC_044998.1	11186118	9654	0.124121
(10490677,10500600)(11191119,11201118)(11191119,11201119)	NC_044998.1	11196119	9925	0.101415
(10500602,10510176)(11201120,11210935)(11201120,11211120)	NC_044998.1	11206120	9576	0.139187
(10510177,10519920)(11211138,11221120)(11211121,11221121)	NC_044998.1	11216121	9745	0.160012
(10519922,10529670)(11221122,11231121)(11221122,11231122)	NC_044998.1	11226122	9750	0.181073
(10529672,10538803)(11231123,11241122)(11231123,11241123)	NC_044998.1	11236123	9133	0.160914
(10538805,10548280)(11241124,11251123)(11241124,11251124)	NC_044998.1	11246124	9477	0.172089
(10548282,10558150)(11251125,11261124)(11251125,11261125)	NC_044998.1	11256125	9870	0.160043
(10558152,10567735)(11261126,11271125)(11261126,11271126)	NC_044998.1	11266126	9585	0.186718
(10567737,10577316)(11271127,11281126)(11271127,11281127)	NC_044998.1	11276127	9581	0.221436
(10577318,10586839)(11281128,11291127)(11281128,11291128)	NC_044998.1	11286128	9523	0.240613
(10586841,10596368)(11291129,11301128)(11291129,11301129)	NC_044998.1	11296129	9529	0.161686
(10596370,10605987)(11301130,11311129)(11301130,11311130)	NC_044998.1	11306130	9619	0.124696
(10605989,10615264)(11311131,11321130)(11311131,11321131)	NC_044998.1	11316131	9277	0.189875
(10615266,10625009)(11321132,11331131)(11321132,11331132)	NC_044998.1	11326132	9745	0.194392
(10625011,10634910)(11331133,11341132)(11331133,11341133)	NC_044998.1	11336133	9901	0.154397
(10634912,10644792)(11341134,11351133)(11341134,11351134)	NC_044998.1	11346134	9882	0.147479
(10644794,10654698)(11351135,11361134)(11351135,11361135)	NC_044998.1	11356135	9906	0.149622
(10654700,10664528)(11361136,11371135)(11361136,11371136)	NC_044998.1	11366136	9830	0.165732
(10664530,10674446)(11371137,11381136)(11371137,11381137)	NC_044998.1	11376137	9918	0.21984
(10674448,10684133)(11381138,11391137)(11381138,11391138)	NC_044998.1	11386138	9687	0.213047
(10684135,10693966)(11391139,11401138)(11391139,11401139)	NC_044998.1	11396139	9833	0.181725
(10693968,10703811)(11401140,11411139)(11401140,11411140)	NC_044998.1	11406140	9845	0.22777
(10703813,10713725)(11411141,11421140)(11411141,11421141)	NC_044998.1	11416141	9914	0.165391
(10713727,10723604)(11421142,11431141)(11421142,11431142)	NC_044998.1	11426142	9879	0.181251
(10723606,10733360)(11431143,11441142)(11431143,11441143)	NC_044998.1	11436143	9756	0.161247
(10733362,10743035)(11441144,11451143)(11441144,11451144)	NC_044998.1	11446144	9675	0.224077
(10743037,10752511)(11451145,11461144)(11451145,11461145)	NC_044998.1	11456145	9476	0.184075
(10752513,10762328)(11461146,11471145)(11461146,11471146)	NC_044998.1	11466146	9817	0.224246
(10762330,10771313)(11471147,11481146)(11471147,11481147)	NC_044998.1	11476147	8985	0.175103
(10771315,10781149)(11481148,11491147)(11481148,11491148)	NC_044998.1	11486148	9836	0.19921
(10781151,10790889)(11491149,11501148)(11491149,11501149)	NC_044998.1	11496149	9740	0.257255
(10790891,10800708)(11501150,11511149)(11501150,11511150)	NC_044998.1	11506150	9819	0.221892
(10800710,10810307)(11511151,11521150)(11511151,11521151)	NC_044998.1	11516151	9599	0.2179
(10810309,10820065)(11521152,11531151)(11521152,11531152)	NC_044998.1	11526152	9758	0.217535
(10820067,10829687)(11531153,11541152)(11531153,11541153)	NC_044998.1	11536153	9622	0.20759
(10829689,10839548)(11541154,11551153)(11541154,11551154)	NC_044998.1	11546154	9861	0.185993
(10839550,10849095)(11551155,11561154)(11551155,11561155)	NC_044998.1	11556155	9547	0.173532
(10849097,10858945)(11561156,11571155)(11561156,11571156)	NC_044998.1	11566156	9850	0.260976
(10858947,10868132)(11571157,11581156)(11571157,11581157)	NC_044998.1	11576157	9187	0.217789
(10868134,10877964)(11581158,11591157)(11581158,11591158)	NC_044998.1	11586158	9832	0.163984
(10877966,10887522)(11591159,11601158)(11591159,11601159)	NC_044998.1	11596159	9558	0.193659
(10887524,10897468)(11601160,11611159)(11601160,11611160)	NC_044998.1	11606160	9946	0.206221
(10897470,10907218)(11611161,11621160)(11611161,11621161)	NC_044998.1	11616161	9750	0.200445
(10907220,10917057)(11621162,11631161)(11621162,11631162)	NC_044998.1	11626162	9839	0.134441
(10917059,10926896)(11631163,11641162)(11631163,11641163)	NC_044998.1	11636163	9839	0.173754
(10926898,10936552)(11641164,11651163)(11641164,11651164)	NC_044998.1	11646164	9656	0.143842
(10936554,10946314)(11651165,11661164)(11651165,11661165)	NC_044998.1	11656165	9762	0.237258
(10946316,10956179)(11661166,11671165)(11661166,11671166)	NC_044998.1	11666166	9865	0.137538
(10956181,10966117)(11671167,11681166)(11671167,11681167)	NC_044998.1	11676167	9938	0.17939
(10966119,10975910)(11681168,11691167)(11681168,11691168)	NC_044998.1	11686168	9793	0.284589
(10975912,10984949)(11691169,11701168)(11691169,11701169)	NC_044998.1	11696169	9039	0.172105
(10984951,10994568)(11701170,11711169)(11701170,11711170)	NC_044998.1	11706170	9619	0.199286
(10994570,11003958)(11711171,11721170)(11711171,11721171)	NC_044998.1	11716171	9390	0.132418
(11003960,11013746)(11721172,11731171)(11721172,11731172)	NC_044998.1	11726172	9788	0.216508
(11013748,11023367)(11731173,11741172)(11731173,11741173)	NC_044998.1	11736173	9621	0.183413
(11023369,11033185)(11741174,11751173)(11741174,11751174)	NC_044998.1	11746174	9818	0.198616
(11033187,11042873)(11751175,11761174)(11751175,11761175)	NC_044998.1	11756175	9688	0.137478
(11042875,11052564)(11761176,11770939)(11761176,11771176)	NC_044998.1	11766176	9691	0.305518
(11052565,11061983)(11771557,11781176)(11771177,11781177)	NC_044998.1	11776177	9420	0.205146
(11061985,11071622)(11781178,11791177)(11781178,11791178)	NC_044998.1	11786178	9639	0.149132
(11071624,11081260)(11791179,11801178)(11791179,11801179)	NC_044998.1	11796179	9638	0.196074
(11081262,11091162)(11801180,11811179)(11801180,11811180)	NC_044998.1	11806180	9902	0.216611
(11091164,11100817)(11811181,11821180)(11811181,11821181)	NC_044998.1	11816181	9655	0.241857
(11100819,11110575)(11821182,11831181)(11821182,11831182)	NC_044998.1	11826182	9758	0.141615
(11110577,11120429)(11831183,11841182)(11831183,11841183)	NC_044998.1	11836183	9854	0.128256
(11120431,11130118)(11841184,11851183)(11841184,11851184)	NC_044998.1	11846184	9689	0.210425
(11130120,11140000)(11851185,11861184)(11851185,11861185)	NC_044998.1	11856185	9882	0.225012
(11140002,11149834)(11861186,11871185)(11861186,11871186)	NC_044998.1	11866186	9834	0.215741
(11149836,11159702)(11871187,11881186)(11871187,11881187)	NC_044998.1	11876187	9868	0.171232
(11159704,11169599)(11881188,11891187)(11881188,11891188)	NC_044998.1	11886188	9897	0.155065
(11169601,11179448)(11891189,11901188)(11891189,11901189)	NC_044998.1	11896189	9849	0.12685
(11179450,11189119)(11901190,11911189)(11901190,11911190)	NC_044998.1	11906190	9671	0.161402
(11189121,11199020)(11911191,11921190)(11911191,11921191)	NC_044998.1	11916191	9901	0.210211
(11199022,11208410)(11921192,11931191)(11921192,11931192)	NC_044998.1	11926192	9390	0.18678
(11208412,11217609)(11931193,11941192)(11931193,11941193)	NC_044998.1	11936193	9199	0.123781
(11217611,11226888)(11941194,11951193)(11941194,11951194)	NC_044998.1	11946194	9279	0.171621
(11226890,11236709)(11951195,11961194)(11951195,11961195)	NC_044998.1	11956195	9821	0.128049
(11236711,11245957)(11961196,11971195)(11961196,11971196)	NC_044998.1	11966196	9248	0.140415
(11245959,11255885)(11971197,11981196)(11971197,11981197)	NC_044998.1	11976197	9928	0.143998
(11255887,11265708)(11981198,11991197)(11981198,11991198)	NC_044998.1	11986198	9823	0.28673
(11265710,11275421)(11991199,12001198)(11991199,12001199)	NC_044998.1	11996199	9713	0.245751
(11275423,11285350)(12001200,12011199)(12001200,12011200)	NC_044998.1	12006200	9929	0.219151
(11285352,11295167)(12011201,12021200)(12011201,12021201)	NC_044998.1	12016201	9817	0.19256
(11295169,11304976)(12021202,12031201)(12021202,12031202)	NC_044998.1	12026202	9809	0.143838
(11304978,11314888)(12031203,12041202)(12031203,12041203)	NC_044998.1	12036203	9912	0.130103
(11314890,11324567)(12041204,12051203)(12041204,12051204)	NC_044998.1	12046204	9679	0.130984
(11324569,11334462)(12051205,12061204)(12051205,12061205)	NC_044998.1	12056205	9895	0.076369
(11334464,11344314)(12061206,12071205)(12061206,12071206)	NC_044998.1	12066206	9852	0.225709
(11344316,11354131)(12071207,12081206)(12071207,12081207)	NC_044998.1	12076207	9817	0.198141
(11354133,11363827)(12081208,12091207)(12081208,12091208)	NC_044998.1	12086208	9696	0.155136
(11363829,11373520)(12091209,12101208)(12091209,12101209)	NC_044998.1	12096209	9693	0.235262
(11373522,11383391)(12101210,12111209)(12101210,12111210)	NC_044998.1	12106210	9871	0.18856
(11383393,11393298)(12111211,12121210)(12111211,12121211)	NC_044998.1	12116211	9907	0.17415
(11393300,11403109)(12121212,12131211)(12121212,12131212)	NC_044998.1	12126212	9811	0.130944
(11403111,11412965)(12131213,12141212)(12131213,12141213)	NC_044998.1	12136213	9856	0.231174
(11412967,11422770)(12141214,12151213)(12141214,12151214)	NC_044998.1	12146214	9805	0.189918
(11422772,11432354)(12151215,12161214)(12151215,12161215)	NC_044998.1	12156215	9584	0.152306
(11432356,11442091)(12161216,12171215)(12161216,12171216)	NC_044998.1	12166216	9737	0.175805
(11442093,11450857)(12171217,12181216)(12171217,12181217)	NC_044998.1	12176217	8766	0.223136
(11450859,11460571)(12181218,12191217)(12181218,12191218)	NC_044998.1	12186218	9714	0.127758
(11460573,11470152)(12191219,12201218)(12191219,12201219)	NC_044998.1	12196219	9581	0.127058
(11470154,11479970)(12201220,12211219)(12201220,12211220)	NC_044998.1	12206220	9818	0.259659
(11479972,11489902)(12211221,12221220)(12211221,12221221)	NC_044998.1	12216221	9932	0.186171
(11489904,11499654)(12221222,12231221)(12221222,12231222)	NC_044998.1	12226222	9752	0.260964
(11499656,11509266)(12231223,12241222)(12231223,12241223)	NC_044998.1	12236223	9612	0.217744
(11509268,11519152)(12241224,12251223)(12241224,12251224)	NC_044998.1	12246224	9886	0.194159
(11519154,11528560)(12251225,12261224)(12251225,12261225)	NC_044998.1	12256225	9408	0.27979
(11528562,11538146)(12261226,12271225)(12261226,12271226)	NC_044998.1	12266226	9586	0.275568
(11538148,11547684)(12271227,12281226)(12271227,12281227)	NC_044998.1	12276227	9538	0.278709
(11547686,11557472)(12281228,12291227)(12281228,12291228)	NC_044998.1	12286228	9788	0.145415
(11557474,11566755)(12291229,12301228)(12291229,12301229)	NC_044998.1	12296229	9283	0.249271
(11566757,11576589)(12301230,12311229)(12301230,12311230)	NC_044998.1	12306230	9834	0.228113
(11576591,11586405)(12311231,12321230)(12311231,12321231)	NC_044998.1	12316231	9816	0.196406
(11586407,11596116)(12321232,12331231)(12321232,12331232)	NC_044998.1	12326232	9711	0.173493
(11596118,11605783)(12331233,12341232)(12331233,12341233)	NC_044998.1	12336233	9667	0.121956
(11605785,11615157)(12341234,12351233)(12341234,12351234)	NC_044998.1	12346234	9374	0.161771
(11615159,11624954)(12351235,12361234)(12351235,12361235)	NC_044998.1	12356235	9797	0.209378
(11624956,11634715)(12361236,12371235)(12361236,12371236)	NC_044998.1	12366236	9761	0.22068
(11634717,11644285)(12371237,12381236)(12371237,12381237)	NC_044998.1	12376237	9570	0.223359
(11644287,11654177)(12381238,12391237)(12381238,12391238)	NC_044998.1	12386238	9892	0.291074
(11654179,11663322)(12391239,12401238)(12391239,12401239)	NC_044998.1	12396239	9145	0.22716
(11663324,11673179)(12401240,12411239)(12401240,12411240)	NC_044998.1	12406240	9857	0.239614
(11673181,11683107)(12411241,12421240)(12411241,12421241)	NC_044998.1	12416241	9928	0.226788
(11683109,11693021)(12421242,12431241)(12421242,12431242)	NC_044998.1	12426242	9914	0.222519
(11693023,11702780)(12431243,12441242)(12431243,12441243)	NC_044998.1	12436243	9759	0.176752
(11702782,11712536)(12441244,12451243)(12441244,12451244)	NC_044998.1	12446244	9756	0.201042
(11712538,11722097)(12451245,12461244)(12451245,12461245)	NC_044998.1	12456245	9561	0.176123
(11722099,11731882)(12461246,12471245)(12461246,12471246)	NC_044998.1	12466246	9785	0.156522
(11731884,11740938)(12471247,12481246)(12471247,12481247)	NC_044998.1	12476247	9056	0.234567
(11740940,11750840)(12481248,12491247)(12481248,12491248)	NC_044998.1	12486248	9902	0.23117
(11750842,11760240)(12491249,12501248)(12491249,12501249)	NC_044998.1	12496249	9400	0.230247
(11760242,11770052)(12501250,12511249)(12501250,12511250)	NC_044998.1	12506250	9812	0.268254
(11770054,11779713)(12511251,12521250)(12511251,12521251)	NC_044998.1	12516251	9661	0.320394
(11779715,11789365)(12521252,12531251)(12521252,12531252)	NC_044998.1	12526252	9652	0.215388
(11789367,11798898)(12531253,12541252)(12531253,12541253)	NC_044998.1	12536253	9533	0.258937
(11798900,11808218)(12541254,12551253)(12541254,12551254)	NC_044998.1	12546254	9320	0.114079
(11808220,11817821)(12551256,12561254)(12551255,12561255)	NC_044998.1	12556255	9603	0.131158
(11817823,11827395)(12561256,12571255)(12561256,12571256)	NC_044998.1	12566256	9574	0.167305
(11827397,11836592)(12571257,12581256)(12571257,12581257)	NC_044998.1	12576257	9197	0.178059
(11836594,11846351)(12581258,12591257)(12581258,12591258)	NC_044998.1	12586258	9759	0.217591
(11846353,11856048)(12591259,12601258)(12591259,12601259)	NC_044998.1	12596259	9697	0.222919
(11856050,11865894)(12601260,12611259)(12601260,12611260)	NC_044998.1	12606260	9846	0.23368
(11865896,11875736)(12611261,12621260)(12611261,12621261)	NC_044998.1	12616261	9842	0.202046
(11875738,11885520)(12621262,12631261)(12621262,12631262)	NC_044998.1	12626262	9784	0.153703
(11885522,11895073)(12631263,12641262)(12631263,12641263)	NC_044998.1	12636263	9553	0.247265
(11895075,11904135)(12641264,12651263)(12641264,12651264)	NC_044998.1	12646264	9062	0.219606
(11904137,11913919)(12651265,12661264)(12651265,12661265)	NC_044998.1	12656265	9784	0.113662
(11913921,11923186)(12661266,12671265)(12661266,12671266)	NC_044998.1	12666266	9267	0.168952
(11923188,11932913)(12671267,12681266)(12671267,12681267)	NC_044998.1	12676267	9727	0.116641
(11932915,11942709)(12681268,12691267)(12681268,12691268)	NC_044998.1	12686268	9796	0.239149
(11942711,11952348)(12691269,12701268)(12691269,12701269)	NC_044998.1	12696269	9639	0.190286
(11952350,11962021)(12701270,12711269)(12701270,12711270)	NC_044998.1	12706270	9673	0.215788
(11962023,11971847)(12711271,12721270)(12711271,12721271)	NC_044998.1	12716271	9826	0.210947
(11971849,11981642)(12721272,12731271)(12721272,12731272)	NC_044998.1	12726272	9795	0.178849
(11981644,11990086)(12731273,12741272)(12731273,12741273)	NC_044998.1	12736273	8444	0.154304
(11990088,11999602)(12741274,12751273)(12741274,12751274)	NC_044998.1	12746274	9516	0.128369
(11999604,12009138)(12751275,12761274)(12751275,12761275)	NC_044998.1	12756275	9536	0.125357
(12009140,12018848)(12761276,12771275)(12761276,12771276)	NC_044998.1	12766276	9710	0.15683
(12018850,12028535)(12771277,12781276)(12771277,12781277)	NC_044998.1	12776277	9687	0.21356
(12028537,12031280)(12781278,12791277)(12781278,12791278)	NC_044998.1	12786278	2745	0.295043
(12031282,12040619)(12791279,12801278)(12791279,12801279)	NC_044998.1	12796279	9339	0.227085
(12040621,12050229)(12801280,12811279)(12801280,12811280)	NC_044998.1	12806280	9610	0.157708
(12050231,12060067)(12811281,12821280)(12811281,12821281)	NC_044998.1	12816281	9838	0.135131
(12060069,12069782)(12821282,12831281)(12821282,12831282)	NC_044998.1	12826282	9715	0.184996
(12069784,12079327)(12831283,12841282)(12831283,12841283)	NC_044998.1	12836283	9545	0.130108
(12079329,12089048)(12841284,12851283)(12841284,12851284)	NC_044998.1	12846284	9721	0.14227
(12089050,12098824)(12851285,12861284)(12851285,12861285)	NC_044998.1	12856285	9776	0.125752
(12098826,12108711)(12861286,12871285)(12861286,12871286)	NC_044998.1	12866286	9887	0.182834
(12108713,12118562)(12871287,12881286)(12871287,12881287)	NC_044998.1	12876287	9851	0.14888
(12118564,12128386)(12881288,12891287)(12881288,12891288)	NC_044998.1	12886288	9824	0.148373
(12128388,12138052)(12891289,12901288)(12891289,12901289)	NC_044998.1	12896289	9666	0.164156
(12138054,12147846)(12901290,12911289)(12901290,12911290)	NC_044998.1	12906290	9794	0.105732
(12147848,12157724)(12911291,12921290)(12911291,12921291)	NC_044998.1	12916291	9878	0.152953
(12157726,12167482)(12921292,12931291)(12921292,12931292)	NC_044998.1	12926292	9758	0.209969
(12167484,12177273)(12931293,12941292)(12931293,12941293)	NC_044998.1	12936293	9791	0.148032
(12177275,12187175)(12941294,12951293)(12941294,12951294)	NC_044998.1	12946294	9902	0.207874
(12187177,12196940)(12951295,12961294)(12951295,12961295)	NC_044998.1	12956295	9765	0.203288
(12196942,12202755)(12961296,12967306)(12961296,12971296)	NC_044998.1	12966296	5815	0.142083
(12202756,12212328)(12971321,12981296)(12971297,12981297)	NC_044998.1	12976297	9574	0.154747
(12212330,12222205)(12981298,12991297)(12981298,12991298)	NC_044998.1	12986298	9877	0.138513
(12222207,12231567)(12991299,13001298)(12991299,13001299)	NC_044998.1	12996299	9362	0.147528
(12231569,12241224)(13001300,13011299)(13001300,13011300)	NC_044998.1	13006300	9657	0.163797
(12241226,12251118)(13011301,13021300)(13011301,13021301)	NC_044998.1	13016301	9894	0.181344
(12251120,12260886)(13021302,13031301)(13021302,13031302)	NC_044998.1	13026302	9768	0.152056
(12260888,12270682)(13031303,13041302)(13031303,13041303)	NC_044998.1	13036303	9796	0.147254
(12270684,12280517)(13041304,13051303)(13041304,13051304)	NC_044998.1	13046304	9835	0.107361
(12280519,12290286)(13051305,13061304)(13051305,13061305)	NC_044998.1	13056305	9769	0.119963
(12290288,12300149)(13061306,13071305)(13061306,13071306)	NC_044998.1	13066306	9863	0.127352
(12300151,12309396)(13071307,13081306)(13071307,13081307)	NC_044998.1	13076307	9247	0.15421
(12309398,12319218)(13081308,13091307)(13081308,13091308)	NC_044998.1	13086308	9822	0.095507
(12319220,12329066)(13091309,13101308)(13091309,13101309)	NC_044998.1	13096309	9848	0.13863
(12329068,12338420)(13101310,13111309)(13101310,13111310)	NC_044998.1	13106310	9354	0.110066
(12338422,12348329)(13111311,13121310)(13111311,13121311)	NC_044998.1	13116311	9909	0.149583
(12348331,12358215)(13121312,13131311)(13121312,13131312)	NC_044998.1	13126312	9886	0.133818
(12358217,12367848)(13131313,13141312)(13131313,13141313)	NC_044998.1	13136313	9633	0.150627
(12367850,12377732)(13141314,13151313)(13141314,13151314)	NC_044998.1	13146314	9884	0.197557
(12377734,12387645)(13151315,13161314)(13151315,13161315)	NC_044998.1	13156315	9913	0.143042
(12387647,12397572)(13161316,13171315)(13161316,13171316)	NC_044998.1	13166316	9927	0.203333
(12397574,12407494)(13171317,13181316)(13171317,13181317)	NC_044998.1	13176317	9922	0.142741
(12407496,12417371)(13181318,13191317)(13181318,13191318)	NC_044998.1	13186318	9877	0.182941
(12417373,12427311)(13191319,13201318)(13191319,13201319)	NC_044998.1	13196319	9940	0.143407
(12427313,12437083)(13201320,13211319)(13201320,13211320)	NC_044998.1	13206320	9772	0.178907
(12437085,12446987)(13211321,13221320)(13211321,13221321)	NC_044998.1	13216321	9904	0.12977
(12446989,12456880)(13221322,13231321)(13221322,13231322)	NC_044998.1	13226322	9893	0.113234
(12456882,12465928)(13231323,13241322)(13231323,13241323)	NC_044998.1	13236323	9048	0.102149
(12465930,12475900)(13241324,13251323)(13241324,13251324)	NC_044998.1	13246324	9972	0.191781
(12475902,12485402)(13251325,13261324)(13251325,13261325)	NC_044998.1	13256325	9502	0.115499
(12485404,12495124)(13261326,13271325)(13261326,13271326)	NC_044998.1	13266326	9722	0.206403
(12495126,12504964)(13271327,13281326)(13271327,13281327)	NC_044998.1	13276327	9840	0.133847
(12504966,12514614)(13281328,13291327)(13281328,13291328)	NC_044998.1	13286328	9650	0.122007
(12514616,12524417)(13291329,13301321)(13291329,13301329)	NC_044998.1	13296329	9803	0.216278
(12524419,12534091)(13301330,13311329)(13301330,13311330)	NC_044998.1	13306330	9674	0.183677
(12534093,12543964)(13311331,13321330)(13311331,13321331)	NC_044998.1	13316331	9873	0.226377
(12543966,12553863)(13321332,13331331)(13321332,13331332)	NC_044998.1	13326332	9899	0.169343
(12553865,12563323)(13331333,13341332)(13331333,13341333)	NC_044998.1	13336333	9460	0.171307
(12563325,12572059)(13341334,13351333)(13341334,13351334)	NC_044998.1	13346334	8736	0.175804
(12572061,12581651)(13351335,13361334)(13351335,13361335)	NC_044998.1	13356335	9592	0.189759
(12581653,12591133)(13361336,13371335)(13361336,13371336)	NC_044998.1	13366336	9482	0.153483
(12591135,12600993)(13371337,13381336)(13371337,13381337)	NC_044998.1	13376337	9860	0.25325
(12600995,12610466)(13381338,13391337)(13381338,13391338)	NC_044998.1	13386338	9473	0.178967
(12610468,12620286)(13391339,13401338)(13391339,13401339)	NC_044998.1	13396339	9820	0.171954
(12620288,12630109)(13401340,13411339)(13401340,13411340)	NC_044998.1	13406340	9823	0.145493
(12630111,12639937)(13411341,13421340)(13411341,13421341)	NC_044998.1	13416341	9828	0.194724
(12639939,12649759)(13421342,13431341)(13421342,13431342)	NC_044998.1	13426342	9822	0.25519
(12649761,12659259)(13431343,13441342)(13431343,13441343)	NC_044998.1	13436343	9500	0.226281
(12659261,12669132)(13441344,13451343)(13441344,13451344)	NC_044998.1	13446344	9873	0.163005
(12669134,12679032)(13451345,13461344)(13451345,13461345)	NC_044998.1	13456345	9900	0.23425
(12679034,12688467)(13461346,13471345)(13461346,13471346)	NC_044998.1	13466346	9435	0.220156
(12688469,12697992)(13471347,13481346)(13471347,13481347)	NC_044998.1	13476347	9525	0.176086
(12697994,12707656)(13481348,13491347)(13481348,13491348)	NC_044998.1	13486348	9664	0.318119
(12707658,12717543)(13491349,13501348)(13491349,13501349)	NC_044998.1	13496349	9887	0.2503
(12717545,12726808)(13501350,13511349)(13501350,13511350)	NC_044998.1	13506350	9265	0.197693
(12726810,12736605)(13511351,13521350)(13511351,13521351)	NC_044998.1	13516351	9797	0.22141
(12736607,12746533)(13521352,13531351)(13521352,13531352)	NC_044998.1	13526352	9928	0.247844
(12746535,12756368)(13531353,13541352)(13531353,13541353)	NC_044998.1	13536353	9835	0.198513
(12756370,12765903)(13541354,13551353)(13541354,13551354)	NC_044998.1	13546354	9535	0.188434
(12765905,12775606)(13551355,13561354)(13551355,13561355)	NC_044998.1	13556355	9703	0.267122
(12775607,12785311)(13561362,13571355)(13561356,13571356)	NC_044998.1	13566356	9706	0.206717
(12785313,12795222)(13571357,13581356)(13571357,13581357)	NC_044998.1	13576357	9911	0.292156
(12795224,12805146)(13581358,13591357)(13581358,13591358)	NC_044998.1	13586358	9924	0.159693
(12805147,12814929)(13591359,13601358)(13591359,13601359)	NC_044998.1	13596359	9784	0.197232
(12814931,12824778)(13601360,13611359)(13601360,13611360)	NC_044998.1	13606360	9849	0.17182
(12824780,12834739)(13611361,13621360)(13611361,13621361)	NC_044998.1	13616361	9961	0.178669
(12834741,12843934)(13621362,13631361)(13621362,13631362)	NC_044998.1	13626362	9195	0.181368
(12843936,12853352)(13631363,13640980)(13631363,13641363)	NC_044998.1	13636363	9418	0.157199
(12853353,12863129)(13641475,13651363)(13641364,13651364)	NC_044998.1	13646364	9778	0.154886
(12863131,12872961)(13651365,13661364)(13651365,13661365)	NC_044998.1	13656365	9832	0.24033
(12872963,12882837)(13661366,13671365)(13661366,13671366)	NC_044998.1	13666366	9876	0.197919
(12882839,12892675)(13671367,13681366)(13671367,13681367)	NC_044998.1	13676367	9838	0.143269
(12892677,12902630)(13681368,13691367)(13681368,13691368)	NC_044998.1	13686368	9955	0.169169
(12902632,12912475)(13691369,13701368)(13691369,13701369)	NC_044998.1	13696369	9845	0.235988
(12912477,12922407)(13701370,13711369)(13701370,13711370)	NC_044998.1	13706370	9932	0.27201
(12922409,12931803)(13711371,13721370)(13711371,13721371)	NC_044998.1	13716371	9396	0.219082
(12931805,12941664)(13721372,13731371)(13721372,13731372)	NC_044998.1	13726372	9861	0.258879
(12941666,12951494)(13731373,13741372)(13731373,13741373)	NC_044998.1	13736373	9830	0.165807
(12951496,12961176)(13741374,13751373)(13741374,13751374)	NC_044998.1	13746374	9682	0.213729
(12961178,12971049)(13751375,13761374)(13751375,13761375)	NC_044998.1	13756375	9873	0.258036
(12971051,12980930)(13761376,13771375)(13761376,13771376)	NC_044998.1	13766376	9881	0.200652
(12980932,12990657)(13771377,13781376)(13771377,13781377)	NC_044998.1	13776377	9727	0.215853
(12990659,13000530)(13781378,13791377)(13781378,13791378)	NC_044998.1	13786378	9873	0.190656
(13000532,13009927)(13791379,13801378)(13791379,13801379)	NC_044998.1	13796379	9397	0.215285
(13009929,13019773)(13801380,13811379)(13801380,13811380)	NC_044998.1	13806380	9846	0.226088
(13019775,13029262)(13811381,13821380)(13811381,13821381)	NC_044998.1	13816381	9489	0.239117
(13029264,13039119)(13821382,13831381)(13821382,13831382)	NC_044998.1	13826382	9857	0.215523
(13039121,13048987)(13831383,13841382)(13831383,13841383)	NC_044998.1	13836383	9868	0.215429
(13048989,13058899)(13841384,13851383)(13841384,13851384)	NC_044998.1	13846384	9912	0.274121
(13058901,13068483)(13851385,13861384)(13851385,13861385)	NC_044998.1	13856385	9584	0.333423
(13068485,13078444)(13861386,13871385)(13861386,13871386)	NC_044998.1	13866386	9961	0.314164
(13078446,13088403)(13871387,13881386)(13871387,13881387)	NC_044998.1	13876387	9959	0.318396
(13088405,13098359)(13881388,13891387)(13881388,13891388)	NC_044998.1	13886388	9956	0.419701
(13098361,13108226)(13891389,13901388)(13891389,13901389)	NC_044998.1	13896389	9867	0.366688
(13108228,13117626)(13901390,13911389)(13901390,13911390)	NC_044998.1	13906390	9400	0.249866
(13117628,13127500)(13911391,13921390)(13911391,13921391)	NC_044998.1	13916391	9874	0.296187
(13127502,13137228)(13921392,13931391)(13921392,13931392)	NC_044998.1	13926392	9728	0.251918
(13137230,13146105)(13931393,13941392)(13931393,13941393)	NC_044998.1	13936393	8877	0.350948
(13146107,13155164)(13941394,13951393)(13941394,13951394)	NC_044998.1	13946394	9059	0.361439
(13155166,13164821)(13951395,13961394)(13951395,13961395)	NC_044998.1	13956395	9657	0.430905
(13164823,13174412)(13961396,13971395)(13961396,13971396)	NC_044998.1	13966396	9591	0.416511
(13174414,13184156)(13971397,13981396)(13971397,13981397)	NC_044998.1	13976397	9744	0.372719
(13184158,13193953)(13981398,13991397)(13981398,13991398)	NC_044998.1	13986398	9797	0.348877
(13193955,13203840)(13991399,14001398)(13991399,14001399)	NC_044998.1	13996399	9887	0.327662
(13203842,13213084)(14001400,14011399)(14001400,14011400)	NC_044998.1	14006400	9244	0.37511
(13213086,13222022)(14011401,14021400)(14011401,14021401)	NC_044998.1	14016401	8938	0.341032
(13222024,13231189)(14021402,14031401)(14021402,14031402)	NC_044998.1	14026402	9167	0.434492
(13231191,13241062)(14031403,14041402)(14031403,14041403)	NC_044998.1	14036403	9873	0.334345
(13241064,13251020)(14041404,14051403)(14041404,14051404)	NC_044998.1	14046404	9958	0.391545
(13251022,13260921)(14051405,14061404)(14051405,14061405)	NC_044998.1	14056405	9901	0.355103
(13260923,13270684)(14061406,14071405)(14061406,14071406)	NC_044998.1	14066406	9763	0.317077
(13270686,13280588)(14071407,14081406)(14071407,14081407)	NC_044998.1	14076407	9904	0.379409
(13280590,13290505)(14081408,14091407)(14081408,14091408)	NC_044998.1	14086408	9917	0.291746
(13290507,13300398)(14091409,14101408)(14091409,14101409)	NC_044998.1	14096409	9893	0.377641
(13300400,13310290)(14101410,14111407)(14101410,14111410)	NC_044998.1	14106410	9892	0.268526
(13310292,13320157)(14111411,14121410)(14111411,14121411)	NC_044998.1	14116411	9867	0.235083
(13320159,13329727)(14121412,14131411)(14121412,14131412)	NC_044998.1	14126412	9570	0.241792
(13329729,13339409)(14131413,14141412)(14131413,14141413)	NC_044998.1	14136413	9682	0.236764
(13339411,13349305)(14141414,14151413)(14141414,14151414)	NC_044998.1	14146414	9896	0.278713
(13349307,13359096)(14151415,14161414)(14151415,14161415)	NC_044998.1	14156415	9791	0.321467
(13359098,13369038)(14161416,14171415)(14161416,14171416)	NC_044998.1	14166416	9942	0.239205
(13369040,13378964)(14171417,14181416)(14171417,14181417)	NC_044998.1	14176417	9926	0.289482
(13378966,13388891)(14181418,14191417)(14181418,14191418)	NC_044998.1	14186418	9927	0.280459
(13388893,13398799)(14191419,14201418)(14191419,14201419)	NC_044998.1	14196419	9908	0.288055
(13398801,13408480)(14201420,14211419)(14201420,14211420)	NC_044998.1	14206420	9681	0.36843
(13408482,13418291)(14211421,14221420)(14211421,14221421)	NC_044998.1	14216421	9811	0.323853
(13418293,13427176)(14221422,14231421)(14221422,14231422)	NC_044998.1	14226422	8885	0.328081
(13427178,13437088)(14231423,14241422)(14231423,14241423)	NC_044998.1	14236423	9912	0.357894
(13437090,13446373)(14241424,14251423)(14241424,14251424)	NC_044998.1	14246424	9285	0.219566
(13446375,13456173)(14251425,14261424)(14251425,14261425)	NC_044998.1	14256425	9800	0.189094
(13456175,13466073)(14261426,14271425)(14261426,14271426)	NC_044998.1	14266426	9900	0.247057
(13466075,13475952)(14271427,14281426)(14271427,14281427)	NC_044998.1	14276427	9879	0.25547
(13475954,13485841)(14281428,14291427)(14281428,14291428)	NC_044998.1	14286428	9889	0.172673
(13485843,13495630)(14291429,14301428)(14291429,14301429)	NC_044998.1	14296429	9789	0.234678
(13495632,13505506)(14301430,14311429)(14301430,14311430)	NC_044998.1	14306430	9876	0.143379
(13505508,13515119)(14311431,14321430)(14311431,14321431)	NC_044998.1	14316431	9613	0.100131
(13515121,13524914)(14321432,14331431)(14321432,14331432)	NC_044998.1	14326432	9795	0.132543
(13524916,13534887)(14331433,14341432)(14331433,14341433)	NC_044998.1	14336433	9973	0.219373
(13534889,13544792)(14341434,14351433)(14341434,14351434)	NC_044998.1	14346434	9905	0.212072
(13544794,13554728)(14351435,14361434)(14351435,14361435)	NC_044998.1	14356435	9936	0.26205
(13554730,13564645)(14361436,14371435)(14361436,14371436)	NC_044998.1	14366436	9917	0.207327
(13564647,13574489)(14371437,14381436)(14371437,14381437)	NC_044998.1	14376437	9844	0.197798
(13574491,13584374)(14381438,14391437)(14381438,14391438)	NC_044998.1	14386438	9885	0.164842
(13584376,13594065)(14391439,14401438)(14391439,14401439)	NC_044998.1	14396439	9691	0.148821
(13594067,13603998)(14401440,14411439)(14401440,14411440)	NC_044998.1	14406440	9933	0.154116
(13604000,13613911)(14411441,14421440)(14411441,14421441)	NC_044998.1	14416441	9913	0.209452
(13613913,13622930)(14421442,14431399)(14421442,14431442)	NC_044998.1	14426442	9019	0.213091
(13622931,13632740)(14431525,14441442)(14431443,14441443)	NC_044998.1	14436443	9811	0.147283
(13632742,13642670)(14441444,14451443)(14441444,14451444)	NC_044998.1	14446444	9930	0.182917
(13642672,13651912)(14451445,14461444)(14451445,14461445)	NC_044998.1	14456445	9242	0.14762
(13651914,13661867)(14461446,14471445)(14461446,14471446)	NC_044998.1	14466446	9955	0.136
(13661869,13671741)(14471447,14481446)(14471447,14481447)	NC_044998.1	14476447	9874	0.160208
(13671743,13680989)(14481448,14491447)(14481448,14491448)	NC_044998.1	14486448	9248	0.156662
(13680991,13690830)(14491449,14501448)(14491449,14501449)	NC_044998.1	14496449	9841	0.210928
(13690832,13700622)(14501450,14511449)(14501450,14511450)	NC_044998.1	14506450	9792	0.175966
(13700624,13710474)(14511451,14521450)(14511451,14521451)	NC_044998.1	14516451	9852	0.193731
(13710476,13720032)(14521452,14531451)(14521452,14531452)	NC_044998.1	14526452	9558	0.152463
(13720034,13729928)(14531453,14541452)(14531453,14541453)	NC_044998.1	14536453	9896	0.262775
(13729930,13739826)(14541454,14551453)(14541454,14551454)	NC_044998.1	14546454	9898	0.132255
(13739828,13749690)(14551455,14561454)(14551455,14561455)	NC_044998.1	14556455	9864	0.120875
(13749692,13759650)(14561456,14571455)(14561456,14571456)	NC_044998.1	14566456	9960	0.152747
(13759652,13769493)(14571457,14581456)(14571457,14581457)	NC_044998.1	14576457	9843	0.205775
(13769495,13779206)(14581458,14591457)(14581458,14591458)	NC_044998.1	14586458	9713	0.184762
(13779208,13789036)(14591459,14601458)(14591459,14601459)	NC_044998.1	14596459	9830	0.194745
(13789038,13798822)(14601460,14611459)(14601460,14611460)	NC_044998.1	14606460	9786	0.167515
(13798824,13808576)(14611461,14621460)(14611461,14621461)	NC_044998.1	14616461	9754	0.161067
(13808578,13818496)(14621462,14631461)(14621462,14631462)	NC_044998.1	14626462	9920	0.179644
(13818498,13828231)(14631463,14641462)(14631463,14641463)	NC_044998.1	14636463	9735	0.150817
(13828233,13838085)(14641464,14651463)(14641464,14651464)	NC_044998.1	14646464	9854	0.164263
(13838087,13847780)(14651465,14661464)(14651465,14661465)	NC_044998.1	14656465	9695	0.130028
(13847782,13857400)(14661466,14671465)(14661466,14671466)	NC_044998.1	14666466	9620	0.154679
(13857402,13867273)(14671467,14681466)(14671467,14681467)	NC_044998.1	14676467	9873	0.208909
(13867275,13877173)(14681468,14691467)(14681468,14691468)	NC_044998.1	14686468	9900	0.13302
(13877175,13886970)(14691469,14701468)(14691469,14701469)	NC_044998.1	14696469	9797	0.117256
(13886972,13896609)(14701470,14711469)(14701470,14711470)	NC_044998.1	14706470	9639	0.19504
(13896611,13906478)(14711471,14721470)(14711471,14721471)	NC_044998.1	14716471	9869	0.217165
(13906480,13916399)(14721472,14731471)(14721472,14731472)	NC_044998.1	14726472	9921	0.241842
(13916401,13925998)(14731473,14741472)(14731473,14741473)	NC_044998.1	14736473	9599	0.184395
(13926000,13935932)(14741474,14751473)(14741474,14751474)	NC_044998.1	14746474	9934	0.278817
(13935934,13945665)(14751475,14761474)(14751475,14761475)	NC_044998.1	14756475	9733	0.20502
(13945667,13955625)(14761476,14771475)(14761476,14771476)	NC_044998.1	14766476	9960	0.19507
(13955627,13965145)(14771477,14781476)(14771477,14781477)	NC_044998.1	14776477	9520	0.204798
(13965147,13975033)(14781478,14791477)(14781478,14791478)	NC_044998.1	14786478	9888	0.132843
(13975035,13984950)(14791479,14801478)(14791479,14801479)	NC_044998.1	14796479	9917	0.113667
(13984952,13994744)(14801480,14811479)(14801480,14811480)	NC_044998.1	14806480	9794	0.14717
(13994746,14004620)(14811481,14821480)(14811481,14821481)	NC_044998.1	14816481	9876	0.17129
(14004622,14014260)(14821482,14831481)(14821482,14831482)	NC_044998.1	14826482	9640	0.097368
(14014262,14024043)(14831483,14841482)(14831483,14841483)	NC_044998.1	14836483	9783	0.16945
(14024045,14033895)(14841484,14851483)(14841484,14851484)	NC_044998.1	14846484	9852	0.166953
(14033897,14043727)(14851485,14861484)(14851485,14861485)	NC_044998.1	14856485	9832	0.221819
(14043729,14053586)(14861486,14871485)(14861486,14871486)	NC_044998.1	14866486	9859	0.185827
(14053588,14063439)(14871487,14881486)(14871487,14881487)	NC_044998.1	14876487	9853	0.125832
(14063441,14073286)(14881488,14891487)(14881488,14891488)	NC_044998.1	14886488	9847	0.161862
(14073288,14083178)(14891489,14901488)(14891489,14901489)	NC_044998.1	14896489	9892	0.164888
(14083180,14093109)(14901490,14911489)(14901490,14911490)	NC_044998.1	14906490	9931	0.103556
(14093111,14102801)(14911491,14921490)(14911491,14921491)	NC_044998.1	14916491	9692	0.14518
(14102803,14112660)(14921492,14931491)(14921492,14931492)	NC_044998.1	14926492	9859	0.202971
(14112662,14122549)(14931493,14941492)(14931493,14941493)	NC_044998.1	14936493	9889	0.100649
(14122551,14132465)(14941494,14951493)(14941494,14951494)	NC_044998.1	14946494	9916	0.099111
(14132467,14142167)(14951495,14961494)(14951495,14961495)	NC_044998.1	14956495	9702	0.133526
(14142169,14151978)(14961496,14971495)(14961496,14971496)	NC_044998.1	14966496	9811	0.131091
(14151980,14161024)(14971497,14981496)(14971497,14981497)	NC_044998.1	14976497	9046	0.162107
(14161026,14170785)(14981498,14991497)(14981498,14991498)	NC_044998.1	14986498	9761	0.239806
(14170787,14180638)(14991499,15001498)(14991499,15001499)	NC_044998.1	14996499	9853	0.168559
(14180640,14190553)(15001500,15011499)(15001500,15011500)	NC_044998.1	15006500	9915	0.136196
(14190555,14200471)(15011501,15021500)(15011501,15021501)	NC_044998.1	15016501	9918	0.081029
(14200473,14210286)(15021502,15031501)(15021502,15031502)	NC_044998.1	15026502	9815	0.100546
(14210288,14220253)(15031503,15041502)(15031503,15041503)	NC_044998.1	15036503	9967	0.132607
(14220255,14229414)(15041504,15051503)(15041504,15051504)	NC_044998.1	15046504	9161	0.17204
(14229416,14239268)(15051505,15061504)(15051505,15061505)	NC_044998.1	15056505	9854	0.131568
(14239270,14249197)(15061506,15071505)(15061506,15071506)	NC_044998.1	15066506	9929	0.224339
(14249199,14258668)(15071507,15081506)(15071507,15081507)	NC_044998.1	15076507	9471	0.178359
(14258670,14268569)(15081508,15091507)(15081508,15091508)	NC_044998.1	15086508	9901	0.177607
(14268571,14278488)(15091509,15101508)(15091509,15101509)	NC_044998.1	15096509	9919	0.229788
(14278490,14288291)(15101510,15111509)(15101510,15111510)	NC_044998.1	15106510	9803	0.172639
(14288293,14297716)(15111511,15121510)(15111511,15121511)	NC_044998.1	15116511	9425	0.14954
(14297718,14307601)(15121512,15131511)(15121512,15131512)	NC_044998.1	15126512	9885	0.260395
(14307603,14317531)(15131513,15141512)(15131513,15141513)	NC_044998.1	15136513	9930	0.120029
(14317533,14327246)(15141514,15151513)(15141514,15151514)	NC_044998.1	15146514	9715	0.135404
(14327248,14337152)(15151515,15161514)(15151515,15161515)	NC_044998.1	15156515	9906	0.112083
(14337154,14347075)(15161516,15171515)(15161516,15171516)	NC_044998.1	15166516	9923	0.098111
(14347077,14356975)(15171517,15181516)(15171517,15181517)	NC_044998.1	15176517	9900	0.108422
(14356977,14366770)(15181518,15191517)(15181518,15191518)	NC_044998.1	15186518	9795	0.115441
(14366772,14376696)(15191519,15201518)(15191519,15201519)	NC_044998.1	15196519	9926	0.171296
(14376698,14386503)(15201520,15211519)(15201520,15211520)	NC_044998.1	15206520	9807	0.183256
(14386505,14395937)(15211521,15221520)(15211521,15221521)	NC_044998.1	15216521	9434	0.091228
(14395939,14404703)(15221522,15231521)(15221522,15231522)	NC_044998.1	15226522	8766	0.079042
(14404705,14414571)(15231523,15241522)(15231523,15241523)	NC_044998.1	15236523	9868	0.115271
(14414573,14423935)(15241524,15251523)(15241524,15251524)	NC_044998.1	15246524	9364	0.135893
(14423937,14433736)(15251525,15261524)(15251525,15261525)	NC_044998.1	15256525	9801	0.141198
(14433738,14443593)(15261526,15271525)(15261526,15271526)	NC_044998.1	15266526	9857	0.112722
(14443595,14453345)(15271527,15281526)(15271527,15281527)	NC_044998.1	15276527	9752	0.125895
(14453347,14462769)(15281528,15291527)(15281528,15291528)	NC_044998.1	15286528	9424	0.233971
(14462771,14472725)(15291529,15301528)(15291529,15301529)	NC_044998.1	15296529	9956	0.149917
(14472727,14482519)(15301530,15311529)(15301530,15311530)	NC_044998.1	15306530	9794	0.164646
(14482521,14492388)(15311531,15321530)(15311531,15321531)	NC_044998.1	15316531	9869	0.137842
(14492390,14502237)(15321532,15331493)(15321532,15331532)	NC_044998.1	15326532	9849	0.075861
(14502238,14511974)(15331605,15341532)(15331533,15341533)	NC_044998.1	15336533	9738	0.118554
(14511976,14521636)(15341534,15351533)(15341534,15351534)	NC_044998.1	15346534	9662	0.13218
(14521638,14531522)(15351535,15361534)(15351535,15361535)	NC_044998.1	15356535	9886	0.143066
(14531524,14541316)(15361536,15371535)(15361536,15371536)	NC_044998.1	15366536	9794	0.086459
(14541318,14551195)(15371537,15381536)(15371537,15381537)	NC_044998.1	15376537	9879	0.173717
(14551197,14560807)(15381538,15391537)(15381538,15391538)	NC_044998.1	15386538	9612	0.194151
(14560809,14570220)(15391539,15401538)(15391539,15401539)	NC_044998.1	15396539	9413	0.183829
(14570222,14580012)(15401540,15411539)(15401540,15411540)	NC_044998.1	15406540	9792	0.169763
(14580014,14589870)(15411541,15421540)(15411541,15421541)	NC_044998.1	15416541	9858	0.16878
(14589872,14599685)(15421542,15431541)(15421542,15431542)	NC_044998.1	15426542	9815	0.15131
(14599687,14609022)(15431543,15441542)(15431543,15441543)	NC_044998.1	15436543	9337	0.168709
(14609024,14618661)(15441544,15451543)(15441544,15451544)	NC_044998.1	15446544	9639	0.210294
(14618663,14628477)(15451545,15461544)(15451545,15461545)	NC_044998.1	15456545	9816	0.148614
(14628479,14638067)(15461546,15471545)(15461546,15471546)	NC_044998.1	15466546	9590	0.206579
(14638069,14646922)(15471547,15481546)(15471547,15481547)	NC_044998.1	15476547	8855	0.148846
(14646924,14656479)(15481548,15491547)(15481548,15491548)	NC_044998.1	15486548	9557	0.12647
(14656481,14665610)(15491549,15501545)(15491549,15501549)	NC_044998.1	15496549	9131	0.10858
(14665611,14675347)(15501554,15511549)(15501550,15511550)	NC_044998.1	15506550	9738	0.119381
(14675349,14685191)(15511551,15521550)(15511551,15521551)	NC_044998.1	15516551	9844	0.187323
(14685193,14695074)(15521552,15531551)(15521552,15531552)	NC_044998.1	15526552	9883	0.166877
(14695076,14704935)(15531553,15541552)(15531553,15541553)	NC_044998.1	15536553	9861	0.190011
(14704937,14714400)(15541554,15551553)(15541554,15551554)	NC_044998.1	15546554	9465	0.112813
(14714402,14724311)(15551555,15561554)(15551555,15561555)	NC_044998.1	15556555	9911	0.097751
(14724313,14733477)(15561556,15571432)(15561556,15571556)	NC_044998.1	15566556	9166	0.141383
(14733478,14742857)(15571568,15581556)(15571557,15581557)	NC_044998.1	15576557	9381	0.171706
(14742859,14752774)(15581558,15591557)(15581558,15591558)	NC_044998.1	15586558	9917	0.186085
(14752776,14762648)(15591559,15601558)(15591559,15601559)	NC_044998.1	15596559	9874	0.175396
(14762650,14772458)(15601560,15611559)(15601560,15611560)	NC_044998.1	15606560	9810	0.209375
(14772460,14782276)(15611561,15621560)(15611561,15621561)	NC_044998.1	15616561	9818	0.092899
(14782278,14792131)(15621562,15631561)(15621562,15631562)	NC_044998.1	15626562	9855	0.150992
(14792133,14802062)(15631563,15641562)(15631563,15641563)	NC_044998.1	15636563	9931	0.128452
(14802064,14811971)(15641564,15651563)(15641564,15651564)	NC_044998.1	15646564	9909	0.132341
(14811973,14821583)(15651565,15661564)(15651565,15661565)	NC_044998.1	15656565	9612	0.201398
(14821585,14831255)(15661566,15671565)(15661566,15671566)	NC_044998.1	15666566	9672	0.121143
(14831257,14841148)(15671567,15681566)(15671567,15681567)	NC_044998.1	15676567	9893	0.06415
(14841150,14850899)(15681568,15691567)(15681568,15691568)	NC_044998.1	15686568	9751	0.151704
(14850901,14860790)(15691569,15701568)(15691569,15701569)	NC_044998.1	15696569	9891	0.183281
(14860792,14868784)(15701570,15711569)(15701570,15711570)	NC_044998.1	15706570	7994	0.132863
(14868786,14878522)(15711571,15721570)(15711571,15721571)	NC_044998.1	15716571	9738	0.122513
(14878524,14888281)(15721572,15731571)(15721572,15731572)	NC_044998.1	15726572	9759	0.132824
(14888283,14897760)(15731573,15741572)(15731573,15741573)	NC_044998.1	15736573	9479	0.137876
(14897762,14907641)(15741574,15751573)(15741574,15751574)	NC_044998.1	15746574	9881	0.209626
(14907643,14915425)(15751575,15759952)(15751575,15761575)	NC_044998.1	15756575	7784	0.166673
(14915426,14924135)(15761709,15771575)(15761576,15771576)	NC_044998.1	15766576	8711	0.173884
(14924137,14933916)(15771577,15781576)(15771577,15781577)	NC_044998.1	15776577	9781	0.175176
(14933918,14943815)(15781578,15791577)(15781578,15791578)	NC_044998.1	15786578	9899	0.180038
(14943817,14953424)(15791579,15801578)(15791579,15801579)	NC_044998.1	15796579	9609	0.137687
(14953426,14963266)(15801580,15811579)(15801580,15811580)	NC_044998.1	15806580	9842	0.145072
(14963268,14973171)(15811581,15821580)(15811581,15821581)	NC_044998.1	15816581	9905	0.140496
(14973173,14982060)(15821582,15831581)(15821582,15831582)	NC_044998.1	15826582	8889	0.134178
(14982062,14991782)(15831583,15841582)(15831583,15841583)	NC_044998.1	15836583	9722	0.213557
(14991784,15001554)(15841584,15851583)(15841584,15851584)	NC_044998.1	15846584	9772	0.141009
(15001556,15010944)(15851585,15861584)(15851585,15861585)	NC_044998.1	15856585	9390	0.118856
(15010946,15020326)(15861586,15871585)(15861586,15871586)	NC_044998.1	15866586	9382	0.16879
(15020328,15029809)(15871587,15881586)(15871587,15881587)	NC_044998.1	15876587	9483	0.159305
(15029811,15038709)(15881588,15891587)(15881588,15891588)	NC_044998.1	15886588	8900	0.282148
(15038711,15048581)(15891589,15901588)(15891589,15901589)	NC_044998.1	15896589	9872	0.136236
(15048583,15058407)(15901590,15911589)(15901590,15911590)	NC_044998.1	15906590	9826	0.226052
(15058409,15067889)(15911591,15921590)(15911591,15921591)	NC_044998.1	15916591	9482	0.120154
(15067891,15076927)(15921592,15931591)(15921592,15931592)	NC_044998.1	15926592	9038	0.19707
(15076929,15086408)(15931593,15941592)(15931593,15941593)	NC_044998.1	15936593	9481	0.220555
(15086410,15096164)(15941594,15951593)(15941594,15951594)	NC_044998.1	15946594	9756	0.314013
(15096166,15106033)(15951595,15961594)(15951595,15961595)	NC_044998.1	15956595	9869	0.328661
(15106035,15115206)(15961596,15971595)(15961596,15971596)	NC_044998.1	15966596	9173	0.426509
(15115208,15125126)(15971597,15981596)(15971597,15981597)	NC_044998.1	15976597	9920	0.205115
(15125128,15134960)(15981598,15991597)(15981598,15991598)	NC_044998.1	15986598	9834	0.272883
(15134962,15144534)(15991599,16001598)(15991599,16001599)	NC_044998.1	15996599	9574	0.193997
(15144536,15153501)(16001600,16011599)(16001600,16011600)	NC_044998.1	16006600	8967	0.172766
(15153503,15163144)(16011601,16021600)(16011601,16021601)	NC_044998.1	16016601	9643	0.235542
(15163146,15172065)(16021602,16031601)(16021602,16031602)	NC_044998.1	16026602	8921	0.180714
(15172067,15181073)(16031603,16041602)(16031603,16041603)	NC_044998.1	16036603	9008	0.184826
(15181075,15190625)(16041604,16051603)(16041604,16051604)	NC_044998.1	16046604	9552	0.169464
(15190627,15199476)(16051605,16061604)(16051605,16061605)	NC_044998.1	16056605	8851	0.13222
(15199478,15208990)(16061606,16071605)(16061606,16071606)	NC_044998.1	16066606	9514	0.186268
(15208992,15218698)(16071607,16081606)(16071607,16081607)	NC_044998.1	16076607	9708	0.122107
(15218700,15228408)(16081608,16091607)(16081608,16091608)	NC_044998.1	16086608	9710	0.200221
(15228410,15237522)(16091609,16101608)(16091609,16101609)	NC_044998.1	16096609	9114	0.161414
(15237524,15246812)(16101610,16111609)(16101610,16111610)	NC_044998.1	16106610	9290	0.217643
(15246814,15256704)(16111611,16121610)(16111611,16121611)	NC_044998.1	16116611	9892	0.166186
(15256706,15265887)(16121612,16131611)(16121612,16131612)	NC_044998.1	16126612	9183	0.138134
(15265889,15274648)(16131613,16141612)(16131613,16141613)	NC_044998.1	16136613	8761	0.126289
(15274650,15283821)(16141614,16151613)(16141614,16151614)	NC_044998.1	16146614	9173	0.174343
(15283823,15292840)(16151615,16161614)(16151615,16161615)	NC_044998.1	16156615	9019	0.181411
(15292842,15302465)(16161616,16171615)(16161616,16171616)	NC_044998.1	16166616	9625	0.178231
(15302467,15312372)(16171617,16181616)(16171617,16181617)	NC_044998.1	16176617	9907	0.162055
(15312374,15321576)(16181618,16191617)(16181618,16191618)	NC_044998.1	16186618	9204	0.122798
(15321578,15331390)(16191619,16201618)(16191619,16201619)	NC_044998.1	16196619	9814	0.121915
(15331392,15341298)(16201620,16211619)(16201620,16211620)	NC_044998.1	16206620	9908	0.165433
(15341300,15351081)(16211621,16221620)(16211621,16221621)	NC_044998.1	16216621	9783	0.145118
(15351083,15360461)(16221622,16231621)(16221622,16231622)	NC_044998.1	16226622	9380	0.172357
(15360463,15370346)(16231623,16241622)(16231623,16241623)	NC_044998.1	16236623	9885	0.157942
(15370348,15380181)(16241624,16251623)(16241624,16251624)	NC_044998.1	16246624	9835	0.081634
(15380183,15389446)(16251625,16261624)(16251625,16261625)	NC_044998.1	16256625	9265	0.137679
(15389448,15398420)(16261626,16271625)(16261626,16271626)	NC_044998.1	16266626	8974	0.128798
(15398422,15407776)(16271627,16281626)(16271627,16281627)	NC_044998.1	16276627	9356	0.161428
(15407778,15417555)(16281628,16291627)(16281628,16291628)	NC_044998.1	16286628	9779	0.190688
(15417557,15427486)(16291629,16301628)(16291629,16301629)	NC_044998.1	16296629	9931	0.157671
(15427488,15436806)(16301630,16311629)(16301630,16311630)	NC_044998.1	16306630	9320	0.095032
(15436808,15446309)(16311631,16321630)(16311631,16321631)	NC_044998.1	16316631	9503	0.215835
(15446311,15455608)(16321632,16331631)(16321632,16331632)	NC_044998.1	16326632	9299	0.310895
(15455610,15465485)(16331633,16341632)(16331633,16341633)	NC_044998.1	16336633	9877	0.237167
(15465487,15469359)(16341634,16345623)(16341634,16351634)	NC_044998.1	16346634	3874	0.18314
(15469360,15473188)(16367776,16371635)(16361636,16371636)	NC_044998.1	16366636	3830	0.235998
(15473190,15483048)(16371637,16381636)(16371637,16381637)	NC_044998.1	16376637	9860	0.195388
(15483050,15492845)(16381638,16391637)(16381638,16391638)	NC_044998.1	16386638	9797	0.157175
(15492847,15502429)(16391639,16401638)(16391639,16401639)	NC_044998.1	16396639	9584	0.122046
(15502431,15512291)(16401640,16411639)(16401640,16411640)	NC_044998.1	16406640	9862	0.14154
(15512293,15522106)(16411641,16421640)(16411641,16421641)	NC_044998.1	16416641	9815	0.238236
(15522108,15530992)(16421642,16431641)(16421642,16431642)	NC_044998.1	16426642	8886	0.140166
(15530994,15540901)(16431643,16441642)(16431643,16441643)	NC_044998.1	16436643	9909	0.080179
(15540903,15550385)(16441644,16451643)(16441644,16451644)	NC_044998.1	16446644	9484	0.225134
(15550387,15560212)(16451645,16461644)(16451645,16461645)	NC_044998.1	16456645	9827	0.246751
(15560214,15570010)(16461646,16471645)(16461646,16471646)	NC_044998.1	16466646	9798	0.115397
(15570012,15579723)(16471647,16481646)(16471647,16481647)	NC_044998.1	16476647	9713	0.11726
(15579725,15589352)(16481648,16491647)(16481648,16491648)	NC_044998.1	16486648	9629	0.115678
(15589354,15598926)(16491649,16501648)(16491649,16501649)	NC_044998.1	16496649	9574	0.149606
(15598928,15608277)(16501650,16511649)(16501650,16511650)	NC_044998.1	16506650	9351	0.171036
(15608279,15618041)(16511651,16521650)(16511651,16521651)	NC_044998.1	16516651	9764	0.160187
(15618043,15627745)(16521652,16531651)(16521652,16531652)	NC_044998.1	16526652	9704	0.104241
(15627747,15637162)(16531653,16541652)(16531653,16541653)	NC_044998.1	16536653	9417	0.125926
(15637164,15646219)(16541654,16551653)(16541654,16551654)	NC_044998.1	16546654	9057	0.11844
(15646221,15656093)(16551655,16561654)(16551655,16561655)	NC_044998.1	16556655	9874	0.145367
(15656095,15665887)(16561656,16571655)(16561656,16571656)	NC_044998.1	16566656	9794	0.121447
(15665888,15675635)(16571657,16581656)(16571657,16581657)	NC_044998.1	16576657	9749	0.202213
(15675637,15685196)(16581658,16591657)(16581658,16591658)	NC_044998.1	16586658	9561	0.233182
(15685198,15695018)(16591659,16601658)(16591659,16601659)	NC_044998.1	16596659	9822	0.185431
(15695020,15704847)(16601660,16611659)(16601660,16611660)	NC_044998.1	16606660	9829	0.209587
(15704849,15713684)(16611661,16621344)(16611661,16621661)	NC_044998.1	16616661	8837	0.198832
(15713685,15723096)(16621707,16631661)(16621662,16631662)	NC_044998.1	16626662	9413	0.182217
(15723098,15732796)(16631663,16641662)(16631663,16641663)	NC_044998.1	16636663	9700	0.150212
(15732798,15742740)(16641664,16651663)(16641664,16651664)	NC_044998.1	16646664	9944	0.130407
(15742742,15752229)(16651665,16661664)(16651665,16661665)	NC_044998.1	16656665	9489	0.15638
(15752231,15762136)(16661666,16671665)(16661666,16671666)	NC_044998.1	16666666	9907	0.192496
(15762138,15771990)(16671667,16681666)(16671667,16681667)	NC_044998.1	16676667	9854	0.139137
(15771992,15781860)(16681668,16691667)(16681668,16691668)	NC_044998.1	16686668	9870	0.158524
(15781862,15791668)(16691669,16701668)(16691669,16701669)	NC_044998.1	16696669	9808	0.171065
(15791670,15801584)(16701670,16711669)(16701670,16711670)	NC_044998.1	16706670	9916	0.177915
(15801586,15810444)(16711671,16721670)(16711671,16721671)	NC_044998.1	16716671	8860	0.183137
(15810446,15820167)(16721672,16731671)(16721672,16731672)	NC_044998.1	16726672	9723	0.304803
(15820169,15829885)(16731673,16741491)(16731673,16741673)	NC_044998.1	16736673	9718	0.156143
(15829886,15839129)(16741878,16751673)(16741674,16751674)	NC_044998.1	16746674	9245	0.123363
(15839131,15848373)(16751675,16761674)(16751675,16761675)	NC_044998.1	16756675	9244	0.125037
(15848375,15858083)(16761676,16771675)(16761676,16771676)	NC_044998.1	16766676	9710	0.113425
(15858085,15867616)(16771677,16781676)(16771677,16781677)	NC_044998.1	16776677	9533	0.151347
(15867618,15877531)(16781678,16791677)(16781678,16791678)	NC_044998.1	16786678	9915	0.178487
(15877533,15887244)(16791679,16801678)(16791679,16801679)	NC_044998.1	16796679	9713	0.146665
(15887246,15896644)(16801680,16811679)(16801680,16811680)	NC_044998.1	16806680	9400	0.129618
(15896646,15906495)(16811681,16821680)(16811681,16821681)	NC_044998.1	16816681	9851	0.141153
(15906497,15916404)(16821682,16831681)(16821682,16831682)	NC_044998.1	16826682	9909	0.135726
(15916406,15926065)(16831683,16841682)(16831683,16841683)	NC_044998.1	16836683	9661	0.157635
(15926067,15935920)(16841684,16851683)(16841684,16851684)	NC_044998.1	16846684	9855	0.17047
(15935922,15945211)(16851685,16861684)(16851685,16861685)	NC_044998.1	16856685	9291	0.10453
(15945213,15954711)(16861686,16871685)(16861686,16871686)	NC_044998.1	16866686	9500	0.075387
(15954713,15964506)(16871687,16881686)(16871687,16881687)	NC_044998.1	16876687	9795	0.123017
(15964508,15974395)(16881688,16891687)(16881688,16891688)	NC_044998.1	16886688	9889	0.116495
(15974397,15984238)(16891689,16901688)(16891689,16901689)	NC_044998.1	16896689	9843	0.111851
(15984240,15993608)(16901690,16911689)(16901690,16911690)	NC_044998.1	16906690	9370	0.13545
(15993610,16003081)(16911691,16921690)(16911691,16921691)	NC_044998.1	16916691	9473	0.130633
(16003083,16013042)(16921692,16931691)(16921692,16931692)	NC_044998.1	16926692	9961	0.142969
(16013044,16022978)(16931693,16941692)(16931693,16941693)	NC_044998.1	16936693	9936	0.082646
(16022980,16032662)(16941694,16951693)(16941694,16951694)	NC_044998.1	16946694	9684	0.113584
(16032664,16042121)(16951695,16961694)(16951695,16961695)	NC_044998.1	16956695	9459	0.12554
(16042123,16051137)(16961696,16971695)(16961696,16971696)	NC_044998.1	16966696	9016	0.138982
(16051139,16061033)(16971697,16981696)(16971697,16981697)	NC_044998.1	16976697	9896	0.19168
(16061035,16070925)(16981698,16991697)(16981698,16991698)	NC_044998.1	16986698	9892	0.202969
(16070927,16080749)(16991699,17001698)(16991699,17001699)	NC_044998.1	16996699	9824	0.135391
(16080751,16090221)(17001700,17011699)(17001700,17011700)	NC_044998.1	17006700	9472	0.209665
(16090223,16099098)(17011701,17021700)(17011701,17021701)	NC_044998.1	17016701	8877	0.124035
(16099100,16108490)(17021702,17031701)(17021702,17031702)	NC_044998.1	17026702	9392	0.144076
(16108492,16118203)(17031703,17041702)(17031703,17041703)	NC_044998.1	17036703	9713	0.162416
(16118205,16127660)(17041704,17051703)(17041704,17051704)	NC_044998.1	17046704	9457	0.189287
(16127662,16137178)(17051705,17061704)(17051705,17061705)	NC_044998.1	17056705	9518	0.112836
(16137180,16147063)(17061706,17071705)(17061706,17071706)	NC_044998.1	17066706	9885	0.176266
(16147065,16156907)(17071707,17081706)(17071707,17081707)	NC_044998.1	17076707	9844	0.107805
(16156909,16166809)(17081708,17091707)(17081708,17091708)	NC_044998.1	17086708	9902	0.123945
(16166811,16175973)(17091709,17101708)(17091709,17101709)	NC_044998.1	17096709	9164	0.141555
(16175975,16185342)(17101710,17111709)(17101710,17111710)	NC_044998.1	17106710	9369	0.111961
(16185344,16194376)(17111711,17121710)(17111711,17121711)	NC_044998.1	17116711	9034	0.158728
(16194378,16203439)(17121712,17131711)(17121712,17131712)	NC_044998.1	17126712	9063	0.110278
(16203441,16213239)(17131713,17141712)(17131713,17141713)	NC_044998.1	17136713	9800	0.147551
(16213241,16222123)(17141714,17151713)(17141714,17151714)	NC_044998.1	17146714	8884	0.177372
(16222125,16231543)(17151715,17161714)(17151715,17161715)	NC_044998.1	17156715	9420	0.114856
(16231545,16241322)(17161716,17171715)(17161716,17171716)	NC_044998.1	17166716	9779	0.120259
(16241324,16251178)(17171717,17181716)(17171717,17181717)	NC_044998.1	17176717	9856	0.199302
(16251180,16260566)(17181718,17191717)(17181718,17191718)	NC_044998.1	17186718	9388	0.158429
(16260568,16269515)(17191719,17201718)(17191719,17201719)	NC_044998.1	17196719	8949	0.140058
(16269517,16279365)(17201720,17211719)(17201720,17211720)	NC_044998.1	17206720	9850	0.100019
(16279366,16288923)(17211721,17221720)(17211721,17221721)	NC_044998.1	17216721	9559	0.092607
(16288925,16298683)(17221722,17231721)(17221722,17231722)	NC_044998.1	17226722	9760	0.110788
(16298685,16308142)(17231723,17241722)(17231723,17241723)	NC_044998.1	17236723	9459	0.180979
(16308144,16317913)(17241724,17251723)(17241724,17251724)	NC_044998.1	17246724	9771	0.156333
(16317915,16327150)(17251725,17261724)(17251725,17261725)	NC_044998.1	17256725	9237	0.163298
(16327152,16337065)(17261726,17271725)(17261726,17271726)	NC_044998.1	17266726	9915	0.16955
(16337067,16346906)(17271727,17281638)(17271727,17281727)	NC_044998.1	17276727	9841	0.198659
(16346907,16356336)(17281728,17291727)(17281728,17291728)	NC_044998.1	17286728	9431	0.174639
(16356338,16366189)(17291729,17301728)(17291729,17301729)	NC_044998.1	17296729	9853	0.153669
(16366191,16375967)(17301730,17311729)(17301730,17311730)	NC_044998.1	17306730	9778	0.144228
(16375969,16385818)(17311731,17321730)(17311731,17321731)	NC_044998.1	17316731	9851	0.168191
(16385820,16395566)(17321732,17331731)(17321732,17331732)	NC_044998.1	17326732	9748	0.206249
(16395568,16405402)(17331733,17341732)(17331733,17341733)	NC_044998.1	17336733	9836	0.166565
(16405404,16415257)(17341734,17351733)(17341734,17351734)	NC_044998.1	17346734	9855	0.188245
(16415259,16425084)(17351735,17361734)(17351735,17361735)	NC_044998.1	17356735	9827	0.206998
(16425086,16434958)(17361736,17371735)(17361736,17371736)	NC_044998.1	17366736	9874	0.147612
(16434960,16444815)(17371737,17381736)(17371737,17381737)	NC_044998.1	17376737	9857	0.163957
(16444817,16454459)(17381738,17391737)(17381738,17391738)	NC_044998.1	17386738	9644	0.143904
(16454461,16464161)(17391739,17401738)(17391739,17401739)	NC_044998.1	17396739	9702	0.108906
(16464163,16469031)(17401740,17408619)(17401740,17411740)	NC_044998.1	17406740	4870	0.177965
(16469032,16469108)(17414967,17415045)(17411741,17421741)	NC_044998.1	17416741	78	0.145311
(16469109,16470060)(17422699,17430523)(17421742,17431742)	NC_044998.1	17426742	953	0.04623
(16470061,16471816)(17432299,17441742)(17431743,17441743)	NC_044998.1	17436743	1757	0.14011
(16471818,16481656)(17441744,17451743)(17441744,17451744)	NC_044998.1	17446744	9840	0.17381
(16481658,16491191)(17451745,17461744)(17451745,17461745)	NC_044998.1	17456745	9535	0.102701
(16491193,16501020)(17461746,17471745)(17461746,17471746)	NC_044998.1	17466746	9829	0.140016
(16501022,16510838)(17471747,17481746)(17471747,17481747)	NC_044998.1	17476747	9818	0.140824
(16510840,16520306)(17481748,17491747)(17481748,17491748)	NC_044998.1	17486748	9468	0.211102
(16520308,16530067)(17491749,17501748)(17491749,17501749)	NC_044998.1	17496749	9761	0.195796
(16530069,16539947)(17501750,17511749)(17501750,17511750)	NC_044998.1	17506750	9880	0.132616
(16539949,16549138)(17511751,17521750)(17511751,17521751)	NC_044998.1	17516751	9191	0.21921
(16549140,16558851)(17521752,17531751)(17521752,17531752)	NC_044998.1	17526752	9713	0.154622
(16558853,16568692)(17531753,17541752)(17531753,17541753)	NC_044998.1	17536753	9841	0.133172
(16568694,16578276)(17541754,17551753)(17541754,17551754)	NC_044998.1	17546754	9584	0.161629
(16578278,16587929)(17551755,17561486)(17551755,17561755)	NC_044998.1	17556755	9653	0.187464
(16587930,16597630)(17561931,17571755)(17561756,17571756)	NC_044998.1	17566756	9702	0.224561
(16597632,16607538)(17571757,17581756)(17571757,17581757)	NC_044998.1	17576757	9908	0.18363
(16607540,16617505)(17581758,17591757)(17581758,17591758)	NC_044998.1	17586758	9967	0.158282
(16617507,16626627)(17591759,17601758)(17591759,17601759)	NC_044998.1	17596759	9122	0.176862
(16626629,16636343)(17601760,17611759)(17601760,17611760)	NC_044998.1	17606760	9716	0.168211
(16636345,16645767)(17611761,17621760)(17611761,17621761)	NC_044998.1	17616761	9424	0.196912
(16645769,16653561)(17621762,17631761)(17621762,17631762)	NC_044998.1	17626762	7794	0.115116
(16653563,16663521)(17631763,17641762)(17631763,17641763)	NC_044998.1	17636763	9960	0.106184
(16663523,16672874)(17641764,17651669)(17641764,17651764)	NC_044998.1	17646764	9353	0.123873
(16672875,16682059)(17652024,17661764)(17651765,17661765)	NC_044998.1	17656765	9186	0.1294
(16682061,16691805)(17661766,17671765)(17661766,17671766)	NC_044998.1	17666766	9746	0.165248
(16691807,16701567)(17671767,17681766)(17671767,17681767)	NC_044998.1	17676767	9762	0.184853
(16701569,16711429)(17681768,17691767)(17681768,17691768)	NC_044998.1	17686768	9862	0.151222
(16711431,16721254)(17691769,17701768)(17691769,17701769)	NC_044998.1	17696769	9825	0.159034
(16721256,16730754)(17701770,17711769)(17701770,17711770)	NC_044998.1	17706770	9500	0.157943
(16730756,16740148)(17711771,17721770)(17711771,17721771)	NC_044998.1	17716771	9394	0.220072
(16740150,16749905)(17721772,17731771)(17721772,17731772)	NC_044998.1	17726772	9757	0.277736
(16749907,16759773)(17731773,17741772)(17731773,17741773)	NC_044998.1	17736773	9868	0.134742
(16759775,16769501)(17741774,17751773)(17741774,17751774)	NC_044998.1	17746774	9728	0.150064
(16769503,16779397)(17751775,17761774)(17751775,17761775)	NC_044998.1	17756775	9896	0.250735
(16779399,16789187)(17761776,17771775)(17761776,17771776)	NC_044998.1	17766776	9790	0.200476
(16789189,16798636)(17771777,17781776)(17771777,17781777)	NC_044998.1	17776777	9449	0.13911
(16798638,16808325)(17781778,17791777)(17781778,17791778)	NC_044998.1	17786778	9689	0.201388
(16808327,16818246)(17791780,17801778)(17791779,17801779)	NC_044998.1	17796779	9921	0.141285
(16818248,16828175)(17801780,17811779)(17801780,17811780)	NC_044998.1	17806780	9929	0.151467
(16828177,16838026)(17811781,17821780)(17811781,17821781)	NC_044998.1	17816781	9851	0.26514
(16838028,16847569)(17821782,17831781)(17821782,17831782)	NC_044998.1	17826782	9543	0.188373
(16847571,16857467)(17831783,17841782)(17831783,17841783)	NC_044998.1	17836783	9898	0.242622
(16857469,16867239)(17841784,17851783)(17841784,17851784)	NC_044998.1	17846784	9772	0.205174
(16867241,16876997)(17851785,17861784)(17851785,17861785)	NC_044998.1	17856785	9758	0.181278
(16876999,16886920)(17861786,17871785)(17861786,17871786)	NC_044998.1	17866786	9923	0.196962
(16886922,16896821)(17871787,17881786)(17871787,17881787)	NC_044998.1	17876787	9901	0.261761
(16896823,16906736)(17881788,17891787)(17881788,17891788)	NC_044998.1	17886788	9915	0.227849
(16906738,16916567)(17891789,17901788)(17891789,17901789)	NC_044998.1	17896789	9831	0.193566
(16916569,16925501)(17901790,17911789)(17901790,17911790)	NC_044998.1	17906790	8934	0.162393
(16925503,16935397)(17911791,17921790)(17911791,17921791)	NC_044998.1	17916791	9896	0.192318
(16935399,16945059)(17921792,17931791)(17921792,17931792)	NC_044998.1	17926792	9662	0.274566
(16945061,16954893)(17931793,17941792)(17931793,17941793)	NC_044998.1	17936793	9834	0.275327
(16954895,16964822)(17941794,17951793)(17941794,17951794)	NC_044998.1	17946794	9929	0.268541
(16964824,16974523)(17951795,17961739)(17951795,17961795)	NC_044998.1	17956795	9701	0.244761
(16974524,16984225)(17961803,17971795)(17961796,17971796)	NC_044998.1	17966796	9703	0.171702
(16984227,16992980)(17971797,17981796)(17971797,17981797)	NC_044998.1	17976797	8755	0.222884
(16992982,17002921)(17981798,17991797)(17981798,17991798)	NC_044998.1	17986798	9941	0.31862
(17002923,17012735)(17991799,18001798)(17991799,18001799)	NC_044998.1	17996799	9814	0.255588
(17012737,17022621)(18001800,18011799)(18001800,18011800)	NC_044998.1	18006800	9886	0.262112
(17022623,17032521)(18011801,18021800)(18011801,18021801)	NC_044998.1	18016801	9900	0.320292
(17032523,17042343)(18021802,18031801)(18021802,18031802)	NC_044998.1	18026802	9822	0.233693
(17042345,17052191)(18031803,18041802)(18031803,18041803)	NC_044998.1	18036803	9848	0.220811
(17052193,17061937)(18041804,18051803)(18041804,18051804)	NC_044998.1	18046804	9746	0.254127
(17061939,17071823)(18051805,18061804)(18051805,18061805)	NC_044998.1	18056805	9886	0.208927
(17071825,17081613)(18061806,18071805)(18061806,18071806)	NC_044998.1	18066806	9790	0.237242
(17081615,17091545)(18071807,18081806)(18071807,18081807)	NC_044998.1	18076807	9932	0.19636
(17091547,17101440)(18081808,18091807)(18081808,18091808)	NC_044998.1	18086808	9895	0.228424
(17101442,17111260)(18091809,18101808)(18091809,18101809)	NC_044998.1	18096809	9820	0.265184
(17111262,17121171)(18101810,18111809)(18101810,18111810)	NC_044998.1	18106810	9911	0.270363
(17121173,17130814)(18111811,18121810)(18111811,18121811)	NC_044998.1	18116811	9643	0.267134
(17130816,17140196)(18121812,18131811)(18121812,18131812)	NC_044998.1	18126812	9382	0.193405
(17140198,17150030)(18131813,18141812)(18131813,18141813)	NC_044998.1	18136813	9834	0.193673
(17150032,17159795)(18141814,18151813)(18141814,18151814)	NC_044998.1	18146814	9765	0.325479
(17159797,17169654)(18151815,18161814)(18151815,18161815)	NC_044998.1	18156815	9859	0.240029
(17169655,17179595)(18161816,18171815)(18161816,18171816)	NC_044998.1	18166816	9942	0.319876
(17179597,17189491)(18171817,18181816)(18171817,18181817)	NC_044998.1	18176817	9896	0.23558
(17189493,17199113)(18181818,18191817)(18181818,18191818)	NC_044998.1	18186818	9622	0.247249
(17199115,17208914)(18191819,18201818)(18191819,18201819)	NC_044998.1	18196819	9801	0.285067
(17208916,17217957)(18201820,18211819)(18201820,18211820)	NC_044998.1	18206820	9043	0.305327
(17217959,17227751)(18211821,18221820)(18211821,18221821)	NC_044998.1	18216821	9794	0.268175
(17227753,17236916)(18221822,18231821)(18221822,18231822)	NC_044998.1	18226822	9165	0.270966
(17236918,17246647)(18231823,18241822)(18231823,18241823)	NC_044998.1	18236823	9731	0.235546
(17246649,17255140)(18241824,18251823)(18241824,18251824)	NC_044998.1	18246824	8493	0.248211
(17255142,17265085)(18251825,18261824)(18251825,18261825)	NC_044998.1	18256825	9945	0.303554
(17265087,17274103)(18261826,18271825)(18261826,18271826)	NC_044998.1	18266826	9018	0.380997
(17274105,17284001)(18271827,18281826)(18271827,18281827)	NC_044998.1	18276827	9898	0.386137
(17284003,17293907)(18281828,18291827)(18281828,18291828)	NC_044998.1	18286828	9906	0.270539
(17293909,17303500)(18291829,18301825)(18291829,18301829)	NC_044998.1	18296829	9593	0.190613
(17303501,17310795)(18301835,18311829)(18301830,18311830)	NC_044998.1	18306830	7296	0.278916
(17310796,17320696)(18311833,18321830)(18311831,18321831)	NC_044998.1	18316831	9902	0.256948
(17320698,17330555)(18321832,18331831)(18321832,18331832)	NC_044998.1	18326832	9859	0.259522
(17330557,17340439)(18331833,18341832)(18331833,18341833)	NC_044998.1	18336833	9884	0.370466
(17340441,17350191)(18341834,18351833)(18341834,18351834)	NC_044998.1	18346834	9752	0.345337
(17350193,17359775)(18351835,18361834)(18351835,18361835)	NC_044998.1	18356835	9584	0.241998
(17359777,17369647)(18361836,18371835)(18361836,18371836)	NC_044998.1	18366836	9872	0.206867
(17369649,17379439)(18371837,18381836)(18371837,18381837)	NC_044998.1	18376837	9792	0.354275
(17379441,17389243)(18381838,18391837)(18381838,18391838)	NC_044998.1	18386838	9804	0.400641
(17389245,17399178)(18391839,18401838)(18391839,18401839)	NC_044998.1	18396839	9935	0.263263
(17399180,17408558)(18401840,18411839)(18401840,18411840)	NC_044998.1	18406840	9380	0.25771
(17408560,17418478)(18411841,18421840)(18411841,18421841)	NC_044998.1	18416841	9920	0.183318
(17418480,17428397)(18421842,18431841)(18421842,18431842)	NC_044998.1	18426842	9919	0.220179
(17428399,17438314)(18431843,18441842)(18431843,18441843)	NC_044998.1	18436843	9917	0.183614
(17438316,17448156)(18441844,18451843)(18441844,18451844)	NC_044998.1	18446844	9842	0.217126
(17448158,17458020)(18451845,18461844)(18451845,18461845)	NC_044998.1	18456845	9864	0.219639
(17458022,17467929)(18461846,18471845)(18461846,18471846)	NC_044998.1	18466846	9909	0.249405
(17467931,17477856)(18471847,18481846)(18471847,18481847)	NC_044998.1	18476847	9927	0.310873
(17477858,17487620)(18481848,18491847)(18481848,18491848)	NC_044998.1	18486848	9764	0.273636
(17487622,17497453)(18491849,18501848)(18491849,18501849)	NC_044998.1	18496849	9833	0.190593
(17497455,17507182)(18501850,18511849)(18501850,18511850)	NC_044998.1	18506850	9729	0.20413
(17507184,17515911)(18511851,18521850)(18511851,18521851)	NC_044998.1	18516851	8729	0.187462
(17515913,17525273)(18521852,18531851)(18521852,18531852)	NC_044998.1	18526852	9362	0.222934
(17525275,17534654)(18531853,18541852)(18531853,18541853)	NC_044998.1	18536853	9381	0.152923
(17534656,17541370)(18541854,18548903)(18541854,18551854)	NC_044998.1	18546854	6716	0.25655
(17541371,17543788)(18551883,18561854)(18551855,18561855)	NC_044998.1	18556855	2419	0.214771
(17543790,17546527)(18561856,18571855)(18561856,18571856)	NC_044998.1	18566856	2739	0.36592
(17546529,17553526)(18571857,18581856)(18571857,18581857)	NC_044998.1	18576857	6999	0.189322
(17553528,17563340)(18581858,18591857)(18581858,18591858)	NC_044998.1	18586858	9814	0.191832
(17563342,17572926)(18591859,18601858)(18591859,18601859)	NC_044998.1	18596859	9586	0.161636
(17572928,17580548)(18601860,18611859)(18601860,18611860)	NC_044998.1	18606860	7622	0.146071
(17580550,17590346)(18611861,18621860)(18611861,18621861)	NC_044998.1	18616861	9798	0.181518
(17590348,17600202)(18621862,18631861)(18621862,18631862)	NC_044998.1	18626862	9856	0.226132
(17600204,17610045)(18631863,18641862)(18631863,18641863)	NC_044998.1	18636863	9843	0.175027
(17610047,17619932)(18641864,18651863)(18641864,18651864)	NC_044998.1	18646864	9887	0.275395
(17619934,17629530)(18651865,18661864)(18651865,18661865)	NC_044998.1	18656865	9598	0.19551
(17629532,17639224)(18661866,18671865)(18661866,18671866)	NC_044998.1	18666866	9694	0.156578
(17639226,17649100)(18671867,18681866)(18671867,18681867)	NC_044998.1	18676867	9876	0.199532
(17649102,17658470)(18681868,18691867)(18681868,18691868)	NC_044998.1	18686868	9370	0.113632
(17658472,17668414)(18691869,18701868)(18691869,18701869)	NC_044998.1	18696869	9944	0.170285
(17668416,17677652)(18701870,18711869)(18701870,18711870)	NC_044998.1	18706870	9238	0.151913
(17677654,17687405)(18711871,18721870)(18711871,18721871)	NC_044998.1	18716871	9753	0.206971
(17687407,17696763)(18721872,18731871)(18721872,18731872)	NC_044998.1	18726872	9358	0.159989
(17696765,17706521)(18731873,18741872)(18731873,18741873)	NC_044998.1	18736873	9758	0.331928
(17706523,17715686)(18741874,18751873)(18741874,18751874)	NC_044998.1	18746874	9165	0.141028
(17715688,17725624)(18751875,18761874)(18751875,18761875)	NC_044998.1	18756875	9938	0.154941
(17725626,17735408)(18761876,18771875)(18761876,18771876)	NC_044998.1	18766876	9784	0.31018
(17735410,17745064)(18771877,18781876)(18771877,18781877)	NC_044998.1	18776877	9656	0.364962
(17745066,17754365)(18781878,18791877)(18781878,18791878)	NC_044998.1	18786878	9301	0.360001
(17754367,17764000)(18791879,18801878)(18791879,18801879)	NC_044998.1	18796879	9635	0.248315
(17764002,17773339)(18801880,18811879)(18801880,18811880)	NC_044998.1	18806880	9339	0.301899
(17773341,17782961)(18811881,18821880)(18811881,18821881)	NC_044998.1	18816881	9622	0.376826
(17782963,17792622)(18821882,18831881)(18821882,18831882)	NC_044998.1	18826882	9661	0.370222
(17792624,17802448)(18831883,18841882)(18831883,18841883)	NC_044998.1	18836883	9826	0.393814
(17802450,17811479)(18841884,18851883)(18841884,18851884)	NC_044998.1	18846884	9031	0.538589
(17811481,17821220)(18851885,18861884)(18851885,18861885)	NC_044998.1	18856885	9741	0.352374
(17821222,17829815)(18861886,18871885)(18861886,18871886)	NC_044998.1	18866886	8595	0.361416
(17829817,17836968)(18871887,18879157)(18871887,18881887)	NC_044998.1	18876887	7153	0.411541
(17836969,17842392)(18883565,18891887)(18881888,18891888)	NC_044998.1	18886888	5425	0.299379
(17842394,17852333)(18891889,18901888)(18891889,18901889)	NC_044998.1	18896889	9941	0.429183
(17852335,17862257)(18901890,18911889)(18901890,18911890)	NC_044998.1	18906890	9924	0.545704
(17862259,17872047)(18911891,18921890)(18911891,18921891)	NC_044998.1	18916891	9790	0.477435
(17872049,17881763)(18921892,18931891)(18921892,18931892)	NC_044998.1	18926892	9716	0.378866
(17881765,17891605)(18931893,18941892)(18931893,18941893)	NC_044998.1	18936893	9842	0.317003
(17891607,17901490)(18941894,18951893)(18941894,18951894)	NC_044998.1	18946894	9885	0.310166
(17901492,17911404)(18951895,18961894)(18951895,18961895)	NC_044998.1	18956895	9914	0.331488
(17911406,17921220)(18961896,18971895)(18961896,18971896)	NC_044998.1	18966896	9816	0.257866
(17921222,17930429)(18971897,18981896)(18971897,18981897)	NC_044998.1	18976897	9209	0.24527
(17930431,17940187)(18981898,18991897)(18981898,18991898)	NC_044998.1	18986898	9758	0.372648
(17940189,17948965)(18991899,19001898)(18991899,19001899)	NC_044998.1	18996899	8778	0.356602
(17948967,17958770)(19001900,19011899)(19001900,19011900)	NC_044998.1	19006900	9805	0.368539
(17958772,17968586)(19011901,19021900)(19011901,19021901)	NC_044998.1	19016901	9816	0.313172
(17968588,17978511)(19021902,19031901)(19021902,19031902)	NC_044998.1	19026902	9925	0.283006
(17978513,17985608)(19031903,19039992)(19031903,19041903)	NC_044998.1	19036903	7097	0.204971
(17985609,17986570)(19042943,19047385)(19041904,19051904)	NC_044998.1	19046904	963	0.395874
(17986571,17987266)(19052035,19058961)(19051905,19061905)	NC_044998.1	19056905	697	0.177925
(17987267,17987506)(19063472,19068124)(19061906,19071906)	NC_044998.1	19066906	241	0.033795
(17987507,17992919)(19072344,19081906)(19071907,19081907)	NC_044998.1	19076907	5414	0.064916
(17992921,17997556)(19081908,19091907)(19081908,19091908)	NC_044998.1	19086908	4637	0.068544
(17997558,18007100)(19091909,19101908)(19091909,19101909)	NC_044998.1	19096909	9544	0.062077
(18007102,18016461)(19101910,19111909)(19101910,19111910)	NC_044998.1	19106910	9361	0.303868
(18016463,18026332)(19111911,19121910)(19111911,19121911)	NC_044998.1	19116911	9871	0.261396
(18026334,18036176)(19121912,19131911)(19121912,19131912)	NC_044998.1	19126912	9844	0.213422
(18036178,18046096)(19131913,19141912)(19131913,19141913)	NC_044998.1	19136913	9920	0.165833
(18046098,18056047)(19141914,19151913)(19141914,19151914)	NC_044998.1	19146914	9951	0.136859
(18056049,18065466)(19151915,19161914)(19151915,19161915)	NC_044998.1	19156915	9419	0.066538
(18065468,18073871)(19161916,19171915)(19161916,19171916)	NC_044998.1	19166916	8405	0.084995
(18073873,18083728)(19171917,19181916)(19171917,19181917)	NC_044998.1	19176917	9857	0.26895
(18083730,18093277)(19181918,19191917)(19181918,19191918)	NC_044998.1	19186918	9549	0.132602
(18093279,18097296)(19191919,19201918)(19191919,19201919)	NC_044998.1	19196919	4019	0.071868
(18097298,18106984)(19201920,19211919)(19201920,19211920)	NC_044998.1	19206920	9688	0.160554
(18106986,18116689)(19211921,19221907)(19211921,19221921)	NC_044998.1	19216921	9705	0.192148
(18116690,18126304)(19221949,19231921)(19221922,19231922)	NC_044998.1	19226922	9616	0.150712
(18126306,18135740)(19231923,19241922)(19231923,19241923)	NC_044998.1	19236923	9436	0.266851
(18135742,18140942)(19241924,19250796)(19241924,19251924)	NC_044998.1	19246924	5202	0.040985
(18140943,18141948)(19253204,19261910)(19251925,19261925)	NC_044998.1	19256925	1007	0.060976
(18141949,18144645)(19262445,19271837)(19261926,19271926)	NC_044998.1	19266926	2698	0.02714
(18144646,18145928)(19272446,19274743)(19271927,19281927)	NC_044998.1	19276927	1284	0.018044
(18145929,18146154)(19285844,19286071)(19281928,19291928)	NC_044998.1	19286928	227	0.038081
(18146155,18150185)(19307618,19311929)(19301930,19311930)	NC_044998.1	19306930	4032	0.17948
(18150187,18157718)(19311931,19321249)(19311931,19321931)	NC_044998.1	19316931	7533	0.200563
(18157719,18158189)(19322615,19331198)(19321932,19331932)	NC_044998.1	19326932	472	0.029282
(18158190,18158229)(19332162,19341796)(19331933,19341933)	NC_044998.1	19336933	41	0.014358
(18158230,18158236)(19343615,19351112)(19341934,19351934)	NC_044998.1	19346934	8	-0.027068
(18158237,18158284)(19352209,19358460)(19351935,19361935)	NC_044998.1	19356935	49	0.045221
(18158285,18158417)(19367298,19369094)(19361936,19371936)	NC_044998.1	19366936	134	0.048736
(18158418,18158658)(19372445,19381628)(19371937,19381937)	NC_044998.1	19376937	242	0.003788
(18158659,18168128)(19382343,19391937)(19381938,19391938)	NC_044998.1	19386938	9471	0.171887
(18168130,18172867)(19391939,19401938)(19391939,19401939)	NC_044998.1	19396939	4739	0.378005
(18172869,18180950)(19401940,19411939)(19401940,19411940)	NC_044998.1	19406940	8083	0.054812
(18180952,18189688)(19411941,19421940)(19411941,19421941)	NC_044998.1	19416941	8738	0.153868
(18189690,18196632)(19421942,19431509)(19421942,19431942)	NC_044998.1	19426942	6944	0.128268
(18196633,18200994)(19433345,19441942)(19431943,19441943)	NC_044998.1	19436943	4363	0.056002
(18200996,18209691)(19441944,19451597)(19441944,19451944)	NC_044998.1	19446944	8697	0.118319
(18209692,18218725)(19452105,19461944)(19451945,19461945)	NC_044998.1	19456945	9035	0.255712
(18218727,18228593)(19461946,19471945)(19461946,19471946)	NC_044998.1	19466946	9868	0.171072
(18228595,18238515)(19471947,19481946)(19471947,19481947)	NC_044998.1	19476947	9922	0.219006
(18238517,18247799)(19481948,19491947)(19481948,19491948)	NC_044998.1	19486948	9284	0.138564
(18247801,18256561)(19491949,19501948)(19491949,19501949)	NC_044998.1	19496949	8762	0.146265
(18256563,18266066)(19501950,19511949)(19501950,19511950)	NC_044998.1	19506950	9505	0.159073
(18266068,18275994)(19511951,19521950)(19511951,19521951)	NC_044998.1	19516951	9928	0.270106
(18275996,18285897)(19521952,19531951)(19521952,19531952)	NC_044998.1	19526952	9903	0.353039
(18285899,18295782)(19531953,19541952)(19531953,19541953)	NC_044998.1	19536953	9885	0.222558
(18295784,18304496)(19541954,19551684)(19541954,19551954)	NC_044998.1	19546954	8714	0.219997
(18304497,18312628)(19552910,19561954)(19551955,19561955)	NC_044998.1	19556955	8133	0.084413
(18312630,18322200)(19561956,19571955)(19561956,19571956)	NC_044998.1	19566956	9572	0.277097
(18322202,18332045)(19571957,19581956)(19571957,19581957)	NC_044998.1	19576957	9845	0.139041
(18332047,18341928)(19581958,19591957)(19581958,19591958)	NC_044998.1	19586958	9883	0.048928
(18341930,18351823)(19591959,19601958)(19591959,19601959)	NC_044998.1	19596959	9895	0.187804
(18351825,18361584)(19601960,19611959)(19601960,19611960)	NC_044998.1	19606960	9761	0.242707
(18361586,18370070)(19611961,19621960)(19611961,19621961)	NC_044998.1	19616961	8486	0.210783
(18370072,18379283)(19621962,19631961)(19621962,19631962)	NC_044998.1	19626962	9213	0.218552
(18379285,18389123)(19631963,19641962)(19631963,19641963)	NC_044998.1	19636963	9840	0.268525
(18389125,18396153)(19641964,19651963)(19641964,19651964)	NC_044998.1	19646964	7030	0.131654
(18396155,18405434)(19651965,19661964)(19651965,19661965)	NC_044998.1	19656965	9281	0.173205
(18405436,18415125)(19661966,19671965)(19661966,19671966)	NC_044998.1	19666966	9691	0.098483
(18415127,18423990)(19671967,19681966)(19671967,19681967)	NC_044998.1	19676967	8865	0.224343
(18423992,18433718)(19681968,19691967)(19681968,19691968)	NC_044998.1	19686968	9728	0.238025
(18433720,18443611)(19691969,19701968)(19691969,19701969)	NC_044998.1	19696969	9893	0.205646
(18443613,18453525)(19701970,19711969)(19701970,19711970)	NC_044998.1	19706970	9914	0.226185
(18453527,18463419)(19711971,19721970)(19711971,19721971)	NC_044998.1	19716971	9894	0.205309
(18463421,18473292)(19721972,19731971)(19721972,19731972)	NC_044998.1	19726972	9873	0.212167
(18473294,18483155)(19731973,19741972)(19731973,19741973)	NC_044998.1	19736973	9863	0.143727
(18483157,18493104)(19741974,19751973)(19741974,19751974)	NC_044998.1	19746974	9949	0.18255
(18493106,18499455)(19751975,19761974)(19751975,19761975)	NC_044998.1	19756975	6351	0.106076
(18499457,18509210)(19761976,19771975)(19761976,19771976)	NC_044998.1	19766976	9755	0.198475
(18509212,18515037)(19771977,19781976)(19771977,19781977)	NC_044998.1	19776977	5827	0.133808
(18515039,18521048)(19781978,19791975)(19781978,19791978)	NC_044998.1	19786978	6011	0.193834
(18521049,18530373)(19791979,19801978)(19791979,19801979)	NC_044998.1	19796979	9326	0.099176
(18530375,18532715)(19801980,19809017)(19801980,19811980)	NC_044998.1	19806980	2342	0.024057
(18532716,18538974)(19812611,19821980)(19811981,19821981)	NC_044998.1	19816981	6260	0.077557
(18538976,18547210)(19821982,19831981)(19821982,19831982)	NC_044998.1	19826982	8236	0.12034
(18547212,18555938)(19831983,19841982)(19831983,19841983)	NC_044998.1	19836983	8728	0.187549
(18555940,18558405)(19841984,19851983)(19841984,19851984)	NC_044998.1	19846984	2467	0.138782
(18558407,18567985)(19851985,19861984)(19851985,19861985)	NC_044998.1	19856985	9580	0.139974
(18567987,18577584)(19861986,19871985)(19861986,19871986)	NC_044998.1	19866986	9599	0.124365
(18577586,18584653)(19871987,19881986)(19871987,19881987)	NC_044998.1	19876987	7069	0.076082
(18584655,18589480)(19881988,19891987)(19881988,19891988)	NC_044998.1	19886988	4827	0.254714
(18589482,18599364)(19891989,19901988)(19891989,19901989)	NC_044998.1	19896989	9884	0.097601
(18599366,18607710)(19901990,19911989)(19901990,19911990)	NC_044998.1	19906990	8346	0.134264
(18607712,18616548)(19911991,19920890)(19911991,19921991)	NC_044998.1	19916991	8838	0.231932
(18616549,18616748)(19922032,19922240)(19921992,19931992)	NC_044998.1	19926992	201	0.0354
(18616749,18624909)(19933277,19941992)(19931993,19941993)	NC_044998.1	19936993	8162	0.343696
(18624911,18634701)(19941994,19951993)(19941994,19951994)	NC_044998.1	19946994	9792	0.297243
(18634703,18644055)(19951995,19961994)(19951995,19961995)	NC_044998.1	19956995	9354	0.267207
(18644057,18652871)(19961996,19971995)(19961996,19971996)	NC_044998.1	19966996	8816	0.236248
(18652873,18660675)(19971997,19981996)(19971997,19981997)	NC_044998.1	19976997	7804	0.243739
(18660677,18670589)(19981998,19991997)(19981998,19991998)	NC_044998.1	19986998	9914	0.285244
(18670591,18680500)(19991999,20001998)(19991999,20001999)	NC_044998.1	19996999	9911	0.250414
(18680502,18690088)(20002000,20011999)(20002000,20012000)	NC_044998.1	20007000	9588	0.262532
(18690090,18698215)(20012001,20022000)(20012001,20022001)	NC_044998.1	20017001	8127	0.121526
(18698217,18708170)(20022002,20032001)(20022002,20032002)	NC_044998.1	20027002	9955	0.235424
[truncated: 99,340 more rows]

## Sheet: GeneFst
Chr	RefSeq	Gene	Start	End	GeneFst	Isoform	nExons	AvgExonFst	nIntron	AvgIntronFst
1	NC_044998.1	LOC100221041	14582	80739	0.152492	XM_030285707.2	18	0.0659839	17	0.13155
1	NC_044998.1	DCBLD2	31388	68748	0.183929	XM_030285694.2	15	0.13441	14	0.175155
1	NC_044998.1	CMSS1	80874	299341	0.218714	XM_012570107.3	10	0.0873029	9	0.189002
1	NC_044998.1	FILIP1L	112495	297570	0.218637	XM_030285647.2	10	0.181564	9	0.207152
1	NC_044998.1	LOC116808959	287349	289742	0.160311	XR_004369230.1	2	0.201514	1	0.00291715
1	NC_044998.1	TBC1D23	300404	343805	0.18776	XM_032751001.1	24	0.0375751	23	0.187981
1	NC_044998.1	NIT2	333622	344667	0.158977	XM_030279461.2	10	0.0387302	9	0.145749
1	NC_044998.1	TOMM70	346168	368957	0.242184	XM_002194146.5	12	0.0588082	11	0.270791
1	NC_044998.1	LNP1	371654	380427	0.26364	XM_012570098.3	3	0.0290349	2	0.259872
1	NC_044998.1	TMEM45A	387231	413422	0.169918	XM_030279815.2	7	0.153009	6	0.21342
1	NC_044998.1	TFG	432649	452186	0.246219	XM_030279966.2	9	0.0872096	8	0.256493
1	NC_044998.1	ABI3BP	452982	580576	0.252625	XM_030280443.2	58	0.0810672	57	0.222207
1	NC_044998.1	IMPG2	611485	656166	0.248167	XM_032749898.1	21	0.175842	20	0.280504
1	NC_044998.1	SENP7	656292	690094	0.237813	XM_030280526.2	23	0.141734	22	0.216688
1	NC_044998.1	LOC100219101	690476	693786	0.19919	XM_002189995.4	2	0.23132	1	0.128261
1	NC_044998.1	TXNL4B	694201	696160	0.0571021	XM_012570108.3	3	0.106525	2	-0.00444981
1	NC_044998.1	TRMT10C	696216	699911	0.227984	XM_032749809.1	2	0.225457	1	0.275439
1	NC_044998.1	PCNP	700995	710203	0.248431	XM_002193688.4	5	0.0663279	4	0.303034
1	NC_044998.1	ZBTB11	709836	727521	0.190883	XM_030281976.2	11	0.0532205	10	0.178664
1	NC_044998.1	RPL24	729953	733605	0.181998	NM_001245644.1	6	0.082847	5	0.135463
1	NC_044998.1	CEP97	733743	751659	0.154013	XM_032749989.1	11	0.103527	10	0.102424
1	NC_044998.1	NXPE3	754248	775890	0.184189	XM_030282385.2	8	0.209161	7	0.165456
1	NC_044998.1	NFKBIZ	781403	798896	0.150724	XM_030282593.2	12	0.0754223	11	0.107242
1	NC_044998.1	ZPLD1	901122	957503	0.169229	XM_030282878.2	10	0.0651498	9	0.194854
1	NC_044998.1	LOC115496959	1426148	1459209	0.274689	XR_003962494.2	2	0.184392	1	0.2746
1	NC_044998.1	ALCAM	1872805	1906198	0.190823	XM_032750177.1	16	0.0585116	15	0.202867
1	NC_044998.1	CBLB	1926027	2046538	0.262546	XM_030283687.2	19	0.0833221	18	0.228885
1	NC_044998.1	LOC115497062	2027702	2036823	0.324711	XR_003962645.2	3	0.221207	2	0.186918
1	NC_044998.1	LOC115497073	2145523	2174223	0.250965	XR_004368912.1	3	0.266016	2	0.216409
1	NC_044998.1	BBX	2459935	2595229	0.219923	XM_030284310.2	18	0.103143	17	0.243977
1	NC_044998.1	LOC116808831	2470830	2493639	0.184372	XR_004369003.1	5	0.177497	4	0.202848
1	NC_044998.1	CD47	2619148	2638749	0.224887	XR_003962905.2	11	0.0554229	10	0.19696
1	NC_044998.1	LOC115497436	2638873	2643179	0.106675	XR_003963014.2	2	0.239168	1	0.0962731
1	NC_044998.1	IFT57	2654502	2668399	0.160764	XM_002192525.4	11	0.0534187	10	0.133182
1	NC_044998.1	LOC116808894	2655586	2665336	0.167284	XR_004369153.1	3	0.138617	2	0.201551
1	NC_044998.1	HHLA2	2668142	2682351	0.173584	XM_032750551.1	8	0.11411	7	0.191957
1	NC_044998.1	MYH15	2681663	2724616	0.171757	XM_030285998.2	42	0.0756604	41	0.15706
1	NC_044998.1	CIP2A	2743591	2770717	0.155085	XM_030286236.2	20	0.137353	19	0.142155
1	NC_044998.1	SH2D1B	2772075	2781292	0.234697	XM_030286320.2	4	0.154201	3	0.240715
1	NC_044998.1	LOC101233451	2821410	2832635	0.265638	XM_004175213.4	6	0.0638251	5	0.255338
1	NC_044998.1	HJURP	2834560	2854003	0.254809	XM_030286431.2	16	0.115587	15	0.182049
1	NC_044998.1	GUCA1C	2864836	2900110	0.193098	XM_002188562.3	4	0.0954735	3	0.192898
1	NC_044998.1	C1H3orf85	2961971	2973219	0.245591	XM_030286773.2	4	0.134744	3	0.1941
1	NC_044998.1	LOC115497582	2962050	2983261	0.242855	XR_004369212.1	3	0.234134	2	0.167509
1	NC_044998.1	LOC115497585	2992551	2997889	0.152691	XR_003963127.2	2	0.109001	1	0.155032
1	NC_044998.1	LOC116808546	3364051	3365922	0.225845	XM_032749134.1	3	0.190683	2	0.0308087
1	NC_044998.1	NECTIN3	3365760	3421947	0.192629	XM_030287033.2	9	0.132204	8	0.213729
1	NC_044998.1	CD96	3513729	3544099	0.168883	XM_032750989.1	15	0.0799291	14	0.163044
1	NC_044998.1	PLCXD2	3550420	3569845	0.232241	XM_032751037.1	5	0.189536	4	0.214603
1	NC_044998.1	PHLDB2	3586656	3686777	0.1716	XM_030287880.2	18	0.119598	17	0.173286
1	NC_044998.1	ABHD10	3688924	3699233	0.215274	XM_002188262.5	5	0.1217	4	0.185746
1	NC_044998.1	TAGLN3	3704079	3716374	0.168148	XM_012570059.3	6	0.124137	5	0.163722
1	NC_044998.1	TMPRSS7	3734003	3762522	0.219401	XM_030288129.2	17	0.125065	16	0.223874
1	NC_044998.1	LOC100228717	3763299	3788072	0.175221	XM_002188206.4	17	0.101366	16	0.190006
1	NC_044998.1	C1H3orf52	3789634	3799118	0.179551	XM_030288818.2	6	0.134596	5	0.124002
1	NC_044998.1	LOC115497877	3815529	3827198	0.17805	XM_030288530.2	5	0.150827	4	0.186544
1	NC_044998.1	LOC100221949	3834556	3861687	0.172874	XR_003963533.2	7	0.214396	6	0.13276
1	NC_044998.1	LTN1	3866176	3897050	0.14324	XM_002189994.5	30	0.102913	29	0.152389
1	NC_044998.1	RWDD2B	3898550	3902542	0.150709	XM_030290197.2	5	0.100529	4	0.1557
1	NC_044998.1	USP16	3902269	3920656	0.12281	XM_030289493.2	18	0.0684849	17	0.148838
1	NC_044998.1	CCT8	3922561	3932849	0.118482	XM_030289939.2	16	0.0672766	15	0.168565
1	NC_044998.1	MAP3K7CL	3942994	3974586	0.147285	XM_002189625.4	6	0.101089	5	0.13969
1	NC_044998.1	LOC116809175	3982792	3988583	0.0757595	XR_004369580.1	2	0.0725269	1	0.0843586
1	NC_044998.1	BACH1	3989723	4024697	0.140173	XM_032751954.1	5	0.143071	4	0.144387
1	NC_044998.1	PAXBP1	4024773	4046733	0.127054	XM_002188006.4	18	0.0259374	17	0.126424
1	NC_044998.1	IL18BP	4049928	4054377	0.217015	XM_030291709.2	5	0.090769	4	0.0957895
1	NC_044998.1	RNF121	4055357	4070093	0.139039	XM_030266799.2	9	0.0315402	8	0.129743
1	NC_044998.1	LOC115498571	4070002	4071770	0.100866	XR_003963866.2	3	0.118886	2	0.0327556
1	NC_044998.1	NUMA1	4071946	4090078	0.113151	XM_030291416.2	26	0.0763244	25	0.0818357
1	NC_044998.1	LAMTOR1	4091233	4095483	0.110852	XM_030291618.2	5	0.0721177	4	0.0977223
1	NC_044998.1	TOMT	4099726	4101056	0.0780129	NM_001282027.2	3	0.0796863	2	0.0624416
1	NC_044998.1	ANAPC15	4101277	4102948	0.136698	XM_030255768.2	4	0.171062	3	0.0644822
1	NC_044998.1	LOC100220024	4104445	4106228	0.106428	XM_030255882.2	5	0.0408431	4	0.122689
1	NC_044998.1	INPPL1	4109034	4123167	0.105656	XM_030255970.2	27	0.0748736	26	0.0811393
1	NC_044998.1	PHOX2A	4123266	4127506	0.113265	XM_030256181.2	3	0.115677	2	0.110695
1	NC_044998.1	CLPB	4130569	4185705	0.148325	XM_032752523.1	14	0.070388	13	0.11999
1	NC_044998.1	ARAP1	4218854	4251222	0.165832	XR_004369734.1	34	0.130927	33	0.145415
1	NC_044998.1	PDE2A	4262651	4301603	0.152177	XM_030257082.2	31	0.0800208	30	0.0803089
1	NC_044998.1	MIR139	4288822	4288906	0.00144928	NR_048998.1	4	0.00129803
1	NC_044998.1	ARRB1	4303319	4316280	0.115382	XM_030257187.2	16	0.0707572	15	0.0965748
1	NC_044998.1	WDR73	4319356	4325305	0.173356	XM_030257426.2	7	0.223758	6	0.147405
1	NC_044998.1	LOC100221052	4367025	4377947	0.200018	XM_030257697.2	3	0.24185	2	0.177949
1	NC_044998.1	EMSY	4414443	4456910	0.200146	XM_030257819.2	21	0.0711491	20	0.199703
1	NC_044998.1	LOC115491304	4457422	4460330	0.131111	XR_003957273.2	2	0.142997	1	0.183657
1	NC_044998.1	THAP12	4459790	4472197	0.196997	XM_030259058.2	5	0.0475156	4	0.170199
1	NC_044998.1	LOC115497792	4498747	4498928	0.238139	XR_004369554.1	1	0.238139
1	NC_044998.1	WNT11	4565393	4595304	0.20159	XM_030259222.2	6	0.100366	5	0.179997
1	NC_044998.1	LOC115491422	4656585	4660473	0.1481	XR_003957289.2	3	0.170404	2	0.146567
1	NC_044998.1	UVRAG	4682982	4763464	0.179355	XM_002187783.5	15	0.0316192	14	0.163477
1	NC_044998.1	DGAT2	4773580	4798070	0.191218	XM_030259838.2	8	0.135104	7	0.181794
1	NC_044998.1	LOC116806738	4782921	4785144	0.143096	XR_004365777.1	2	0.0461143	1	0.160817
1	NC_044998.1	MOGAT2	4816721	4841244	0.129889	XM_002187607.3	6	0.133574	5	0.116196
1	NC_044998.1	MAP6	4853404	4883430	0.131302	XM_030260138.2	3	0.0796248	2	0.144538
1	NC_044998.1	LOC100232594	4898367	4902884	0.198761	XM_030277557.2	5	0.0064637	4	0.165008
1	NC_044998.1	APP	4921812	5058835	0.176362	XM_030260268.2	17	0.0499021	16	0.170163
1	NC_044998.1	GABPA	5069384	5096240	0.265529	XM_012570081.3	10	0.0862929	9	0.262614
1	NC_044998.1	ATP5PF	5096112	5101630	0.219163	NM_001245762.1	4	0.264527	3	0.236296
1	NC_044998.1	JAM2	5101172	5135716	0.277406	XM_030260895.2	11	0.170135	10	0.220203
1	NC_044998.1	MRPL39	5143482	5154645	0.206449	XM_030261187.2	10	0.109455	9	0.216197
1	NC_044998.1	LOC116806824	5154836	5166061	0.196948	XR_004365906.1	2	0.181907	1	0.305988
1	NC_044998.1	MIR155	5160578	5160648	0	MIR155	4	0
1	NC_044998.1	LOC116806828	5704205	5709630	0.305556	XR_004365908.1	2	0.354745	1	0.24722
1	NC_044998.1	NCAM2	5974814	6244953	0.21809	XM_002186867.4	18	0.0905197	17	0.210627
1	NC_044998.1	TMPRSS15	7204311	7262237	0.214719	XM_032749177.1	27	0.145866	26	0.212752
1	NC_044998.1	CHODL	7265921	7291466	0.206005	XM_030261509.2	8	0.146114	7	0.259453
1	NC_044998.1	LOC115497744	7347811	7349489	0.147163	XR_003963320.2	2	0.172464	1	0.117486
1	NC_044998.1	C1H21orf91	7424693	7443827	0.177724	XM_030261641.2	5	0.0850528	4	0.155243
1	NC_044998.1	LOC115492635	7446846	7458448	0.133155	XM_030261746.2	6	0.149424	5	0.14065
1	NC_044998.1	CXADR	7478343	7511376	0.156105	XM_030261895.2	7	0.0476318	6	0.176358
1	NC_044998.1	LOC115492979	7675684	7764874	0.160926	XR_003957959.2	4	0.0745897	3	0.18761
1	NC_044998.1	LOC115492903	7767385	8045050	0.228625	XR_004366075.1	6	0.145769	5	0.238685
1	NC_044998.1	MIR125-1	7768664	7768735	0.00719055	MIR125	6	0.00239685
1	NC_044998.1	LOC115493031	7774520	7808863	0.178207	XR_003957964.2	3	0.138975	2	0.199436
1	NC_044998.1	MIRLET7C-2	7802615	7802706	0	NR_049036.1	1	0
1	NC_044998.1	MIR99-1	7803351	7803421	0.0960547	NR_049043.1	4	0.0480273
1	NC_044998.1	USP25	8106188	8195268	0.214011	XM_030262523.2	26	0.0637127	25	0.221795
1	NC_044998.1	NRIP1	8345326	8485786	0.169995	XM_030262825.2	5	0.0362199	4	0.162708
1	NC_044998.1	LOC115493342	8392935	8401232	0.175377	XR_003958065.2	2	0.195459	1	0.176075
1	NC_044998.1	LOC100226157	8588731	8671849	0.177363	XM_030262850.2	16	0.0659569	15	0.197119
1	NC_044998.1	LOC116807449	8662249	8699579	0.155513	XR_004366327.1	4	0.150981	3	0.154684
1	NC_044998.1	HSPA13	8699812	8708609	0.135538	XM_030262868.2	5	0.0757591	4	0.130637
1	NC_044998.1	LIPI	8725623	8741269	0.124945	XM_002192524.5	10	0.0960646	9	0.136456
1	NC_044998.1	ROBO2	8774041	9803246	0.182399	XM_032751030.1	30	0.0950756	29	0.147745
1	NC_044998.1	LOC116807531	9891716	9895736	0.144003	XR_004366437.1	2	0.129144	1	0.128529
1	NC_044998.1	ROBO1	10070111	10760306	0.145307	XM_030262895.2	31	0.0754761	30	0.149237
1	NC_044998.1	LOC115493357	10725241	10749388	0.145108	XR_004369242.1	3	0.0355426	2	0.0639805
1	NC_044998.1	LOC115493358	11056223	11064656	0.146312	XR_004366470.1	6	0.0956675	5	0.232196
1	NC_044998.1	GBE1	11323443	11460041	0.181596	XM_030263000.2	17	0.107042	16	0.211859
1	NC_044998.1	LOC115493362	11459720	11472225	0.224033	XR_004366599.1	4	0.188881	3	0.188079
1	NC_044998.1	LOC115493364	11506891	11625298	0.198179	XR_003958105.2	4	0.160285	3	0.172221
1	NC_044998.1	LOC115493363	11627812	11647803	0.1562	XR_004366604.1	6	0.075204	5	0.158583
1	NC_044998.1	LOC115493366	11737957	11748769	0.18115	XR_004366612.1	4	0.172214	3	0.189961
1	NC_044998.1	LOC100225263	12195665	12197279	0.127945	XM_032751807.1	1	0.127945
1	NC_044998.1	LOC116807698	12415621	12425698	0.225696	XR_004366621.1	2	0.230808	1	0.289994
1	NC_044998.1	CADM2	12453768	13048935	0.184599	XM_030263057.2	11	0.0434548	10	0.167925
1	NC_044998.1	LOC115493375	13204040	13209990	0.172306	XR_003958114.2	4	0.267433	3	0.191826
1	NC_044998.1	LOC116807701	13222674	13231049	0.109367	XR_004366627.1	2	0.126426	1	0.0699795
1	NC_044998.1	LOC115493382	13231378	13331965	0.167419	XR_004366626.1	15	0.10206	14	0.138116
1	NC_044998.1	VGLL3	13357264	13383486	0.208674	XM_030263142.2	4	0.173352	3	0.20265
1	NC_044998.1	CHMP2B	13442850	13454208	0.164708	XM_002194915.4	6	0.0723658	5	0.153231
1	NC_044998.1	POU1F1	13456123	13466954	0.237185	XM_030263177.2	8	0.199811	7	0.223763
1	NC_044998.1	HTR1F	13603443	13707533	0.180933	XM_030263244.2	4	0.156056	3	0.176328
1	NC_044998.1	LOC105759805	13723007	13745837	0.185876	XM_030263254.2	8	0.157914	7	0.151873
1	NC_044998.1	PDZK1	13755018	13764033	0.189964	XM_030263186.2	9	0.198655	8	0.153193
1	NC_044998.1	GPR89B	13764598	13781184	0.197854	XM_030263209.2	14	0.0798681	13	0.181772
1	NC_044998.1	GJA8	13788927	13795395	0.178431	XM_030263291.2	2	0.107431	1	0.1924
1	NC_044998.1	GJA5	13826766	13845587	0.239274	XM_030263303.2	2	0.200058	1	0.228661
1	NC_044998.1	ACP6	13858741	13866714	0.214673	XM_030263366.2	10	0.126037	9	0.201729
1	NC_044998.1	BCL9	13872539	13930274	0.31773	XM_030263324.2	9	0.174964	8	0.306456
1	NC_044998.1	POGLUT1	13963909	13978140	0.457975	XM_030263382.2	11	0.154771	10	0.453443
1	NC_044998.1	TIMMDC1	13978658	13985582	0.370699	XM_004176269.4	7	0.0884907	6	0.245725
1	NC_044998.1	CD80	13987219	14010305	0.354273	XM_012570026.3	7	0.230458	6	0.270695
1	NC_044998.1	ADPRH	14026868	14035730	0.428481	XM_032746306.1	4	0.256953	3	0.344603
1	NC_044998.1	IGSF3	14034950	14128397	0.324127	XM_002193985.5	10	0.291566	9	0.322509
1	NC_044998.1	LOC115493446	14124102	14126440	0.258764	XR_003958256.2	2	0.263255	1	0.237294
1	NC_044998.1	CD101	14234004	14251223	0.277079	XM_030263420.2	9	0.277727	8	0.226457
1	NC_044998.1	PTGFRN	14262416	14327907	0.181793	XM_030263453.2	9	0.2087	8	0.220573
1	NC_044998.1	LOC116807706	14333968	14347442	0.253434	XR_004366647.1	2	0.241804	1	0.258652
1	NC_044998.1	CD2	14373072	14384456	0.203271	XM_030263466.2	5	0.238116	4	0.23142
1	NC_044998.1	LOC100222365	14395672	14406689	0.140855	XM_012570042.3	6	0.0813378	5	0.157822
1	NC_044998.1	LOC115497747	14428885	14431527	0.134933	XR_003963321.2	3	0.0867859	2	0.118742
1	NC_044998.1	ILDR2	14439599	14481286	0.159573	XM_030263510.2	10	0.0943497	9	0.158876
1	NC_044998.1	MAEL	14491382	14503623	0.211083	XM_030263523.2	12	0.0614163	11	0.173869
1	NC_044998.1	GPA33	14506191	14558874	0.165723	XM_030263541.2	9	0.136641	8	0.143941
1	NC_044998.1	DUSP27	14522852	14538960	0.188636	XM_030263519.2	6	0.193568	5	0.137469
1	NC_044998.1	POU2F1	14559121	14672235	0.170375	XM_012570057.3	16	0.0247164	15	0.147975
1	NC_044998.1	CD247	14671720	14720168	0.174093	XM_030263629.2	8	0.0465727	7	0.191406
1	NC_044998.1	CREG1	14728322	14734195	0.176837	XM_002190958.5	4	0.187656	3	0.241858
1	NC_044998.1	RCSD1	14742122	14772227	0.229678	XM_030263664.2	7	0.078085	6	0.211055
1	NC_044998.1	MPZL1	14778171	14815561	0.138821	XM_030287032.2	5	0.0513772	4	0.136018
1	NC_044998.1	MPC2	14816288	14823313	0.154342	XM_002192851.5	5	0.00914514	4	0.188195
1	NC_044998.1	DCAF6	14823874	14897218	0.170238	XM_030263685.2	22	0.082139	21	0.175807
1	NC_044998.1	LOC115493512	14887824	14918163	0.146068	XR_003958349.2	4	0.0285522	3	0.183397
1	NC_044998.1	GABRR3	14924924	14954675	0.116814	XM_002190668.4	9	0.0980153	8	0.102348
1	NC_044998.1	RIOX2	14956907	14967778	0.122358	XM_030263825.2	10	0.114976	9	0.103189
1	NC_044998.1	CRYBG3	14968504	15049209	0.15181	XM_030263801.2	22	0.133293	21	0.174531
1	NC_044998.1	ARL6	15060409	15079496	0.202722	XM_012570036.3	9	0.0554731	8	0.173114
1	NC_044998.1	LOC100218462	15081106	15461515	0.148117	XM_030263868.2	19	0.0721169	18	0.149274
1	NC_044998.1	LOC115493532	15087475	15102503	0.210409	XR_003958390.2	2	0.191658	1	0.21617
1	NC_044998.1	LOC116809119	15612914	15616834	0.0676212	XR_004369519.1	3	0.0816018	2	0.0521638
1	NC_044998.1	LOC116809121	15629915	15632244	0.0884445	XR_004369520.1	3	0.110747	2	0.0465701
1	NC_044998.1	LOC115493533	15993722	16032052	0.201524	XR_004366733.1	3	0.144421	2	0.221185
1	NC_044998.1	NSUN3	16176521	16190901	0.137682	XM_032746427.1	7	0.17373	6	0.100723
1	NC_044998.1	ARL13B	16193348	16226861	0.153237	XM_004176265.4	11	0.136275	10	0.150882
1	NC_044998.1	STX19	16206373	16218835	0.167095	XM_030263977.2	2	0.134527	1	0.167838
1	NC_044998.1	PROS1	16227307	16248560	0.147406	XM_030263927.2	15	0.0761028	14	0.136844
1	NC_044998.1	EPHA3	16432835	16612441	0.158497	XM_030263981.2	17	0.0858513	16	0.166208
1	NC_044998.1	LOC115493552	16716293	16720154	0.186922	XR_004366783.1	3	0.156726	2	0.169372
1	NC_044998.1	C1H3orf38	16915287	16920598	0.119714	XM_030264002.2	3	0.157994	2	0.077861
1	NC_044998.1	ZNF654	16923443	16953749	0.105706	XM_030263993.2	9	0.0460361	8	0.0849495
1	NC_044998.1	CGGBP1	16954237	16961817	0.152571	XM_030264018.2	2	0.0933872	1	0.0946295
1	NC_044998.1	N6AMT1	16963879	16969754	0.152652	XM_012570015.3	7	0.0657423	6	0.151632
1	NC_044998.1	LOC116807745	17231918	17246158	0.173964	XR_004366802.1	3	0.227664	2	0.0717548
1	NC_044998.1	LOC115497755	17392723	17398262	0.0997013	XR_004369524.1	3	0.177227	2	0.088321
1	NC_044998.1	LOC116809127	17427218	17429061	0.0712434	XR_004369525.1	2	0.0193926	1	0.0751502
1	NC_044998.1	LOC115493554	17542606	17542989	0.308241	XR_003958412.2	2	0.0152998	1	0.454212
1	NC_044998.1	ADAMTS5	17542993	17582120	0.190744	XM_004176268.4	8	0.107674	7	0.19508
1	NC_044998.1	ADAMTS1	17602617	17610524	0.189776	XM_030264019.2	9	0.0849822	8	0.123786
1	NC_044998.1	GDPD5	17631227	17736675	0.168818	XM_002190415.5	17	0.0368418	16	0.127728
1	NC_044998.1	LOC115493573	17737601	17762012	0.193981	XR_004366809.1	7	0.200778	6	0.176824
1	NC_044998.1	SERPINH1	17759220	17765670	0.179792	XM_030264046.2	5	0.0785361	4	0.102721
1	NC_044998.1	RPS3	17767867	17772680	0.220907	NM_001245349.1	7	0.087212	6	0.212169
1	NC_044998.1	LOC115497774	17769084	17769231	0.0905017	XR_003963361.2	1	0.0905017
1	NC_044998.1	LOC115497777	17770237	17770383	0.377517	XR_003963364.2	1	0.377517
1	NC_044998.1	FCHSD2	17782770	17903552	0.203081	XM_030264090.2	21	0.0780306	20	0.177879
1	NC_044998.1	LOC115493595	17904242	17905785	0.192234	XR_003958423.2	3	0.20369	2	0.202377
1	NC_044998.1	P2RY2	17921765	17934068	0.273356	XR_003958426.2	3	0.150402	2	0.367867
1	NC_044998.1	P2RY6	17951451	17959477	0.212432	XM_012570037.3	2	0.221911	1	0.278531
1	NC_044998.1	ARHGEF17	17962126	17993126	0.240726	XM_030264172.2	21	0.292383	20	0.287722
1	NC_044998.1	RELT	17996561	18001468	0.268827	XM_030264201.2	11	0.162095	10	0.238202
1	NC_044998.1	FAM168A	18000660	18129388	0.245502	XM_030266898.2	9	0.0961708	8	0.279865
1	NC_044998.1	PLEKHB1	18131792	18137622	0.166121	XM_030264185.2	7	0.144383	6	0.154846
1	NC_044998.1	RAB6A	18144455	18183918	0.276615	NM_001245470.1	8	0.0283001	7	0.316615
1	NC_044998.1	MRPL48	18183698	18191710	0.25414	XM_032746499.1	10	0.134822	9	0.251509
1	NC_044998.1	LOC100219445	18192686	18193526	0.0976022	XM_030264237.2	2	0.12783	1	0.0696393
1	NC_044998.1	PAAF1	18193550	18203042	0.31124	XM_030264227.2	12	0.197599	11	0.295129
1	NC_044998.1	DNAJB13	18203145	18207075	0.323949	XM_030266233.2	8	0.111351	7	0.349396
1	NC_044998.1	HUNK	18255261	18298535	0.319478	XM_012570010.3	10	0.155366	9	0.351364
1	NC_044998.1	SCAF4	18311195	18340854	0.298996	XM_030264272.2	21	0.13078	20	0.276172
1	NC_044998.1	SOD1	18341815	18344987	0.374373	NM_001245154.2	5	0.132102	4	0.321244
1	NC_044998.1	LOC116809129	18345201	18346360	0.305737	XR_004369526.1	2	0.316665	1	0.237476
1	NC_044998.1	TIAM1	18354967	18510918	0.259644	XM_012570006.3	27	0.167863	26	0.203283
1	NC_044998.1	LOC115497758	18532227	18533240	0.183987	XR_003963331.2	2	0.133939	1	0.192162
1	NC_044998.1	LOC100229020	18543211	18547402	0.254441	XM_030264348.2	2	0.254789	1	0.216029
1	NC_044998.1	LOC115493639	18565046	18567109	0.282231	XR_004366857.1	3	0.0940769	2	0
1	NC_044998.1	GRIK1	18620525	18723346	0.18579	XM_030264374.2	17	0.0998228	16	0.160087
1	NC_044998.1	SLCO2B1	18738538	18768943	0.172972	XM_030264435.2	15	0.144719	14	0.168514
1	NC_044998.1	TPBGL	18813303	18821708	0.347836	XM_032746557.1	1	0.347836
1	NC_044998.1	PGM2L1	18820925	18846345	0.38021	XM_030264477.2	13	0.205599	12	0.302978
1	NC_044998.1	KCNE3	18853065	18855205	0.401756	XM_012570004.3	2	0.423434	1	0.452212
1	NC_044998.1	LIPT2	18855864	18858263	0.254669	XM_002187782.4	2	0.16663	1	0.410115
1	NC_044998.1	POLD3	18864702	18895675	0.368712	XM_030264527.2	12	0.0980553	11	0.347806
1	NC_044998.1	CHRDL2	18906858	18929505	0.446125	XM_002187578.5	11	0.128294	10	0.460627
1	NC_044998.1	RNF169	18935737	18956448	0.331523	XM_032746583.1	6	0.156603	5	0.333341
1	NC_044998.1	SPCS2	18957770	18961367	0.148409	XM_002187489.5	5	0.029928	4	0.0925021
1	NC_044998.1	NEU3	18962068	18965243	0.252301	XM_030264672.2	4	0.285227	3	0.0922433
1	NC_044998.1	P4HA3	18965294	18971990	0.260377	XM_030278118.2	16	0.0855158	15	0.108761
1	NC_044998.1	PPME1	18973677	18991930	0.342475	XM_002187192.4	14	0.052257	13	0.251555
1	NC_044998.1	C2CD3	18992209	19031215	0.327616	XM_030264565.2	32	0.12872	31	0.263354
1	NC_044998.1	UCP3	19031364	19035000	0.281161	XM_030264708.2	6	0.179944	5	0.196799
1	NC_044998.1	LOC116807788	19035102	19060766	0.237832	XR_004366892.1	9	0.0377267	8	0.1268
1	NC_044998.1	LOC115496044	19051249	19052968	0.18323	XM_030278234.2	2	0.0916149	1	0
1	NC_044998.1	LOC115493676	19075778	19080694	0.0132689	XR_003958539.2	2	0.0346334	1	0.00719627
1	NC_044998.1	SYNJ1	19091814	19141838	0.163166	XM_030264830.2	33	0.0205596	32	0.140487
1	NC_044998.1	LOC115493692	19127357	19131515	0.202793	XR_003958582.2	2	0.114941	1	0.182442
1	NC_044998.1	CFAP298	19141977	19149698	0.141417	XM_030277152.2	7	0.00195834	6	0.0936922
1	NC_044998.1	EVA1C	19154018	19192456	0.168916	XM_012569998.3	8	0.0361229	7	0.139174
1	NC_044998.1	LOC100224236	19203641	19247573	0.156526	XM_030264918.2	39	0.0265695	38	0.133932
1	NC_044998.1	LOC115493699	19488415	19489781	0.131217	XR_003958593.1	2	0.0456173	1	0.144324
1	NC_044998.1	COL8A1	19503110	19589039	0.154149	XM_032746667.1	4	0.0090448	3	0.20702
1	NC_044998.1	LOC116807808	19552835	19587551	0.0990318	XR_004366936.1	3	0.0654297	2	0.125251
1	NC_044998.1	ST3GAL6	19590621	19663533	0.210931	XM_030265120.2	8	0.135513	7	0.175692
1	NC_044998.1	CPOX	19665894	19675069	0.129013	XM_002190647.4	7	0.00228321	6	0.0505704
1	NC_044998.1	TTF2	19683861	19701890	0.20107	XM_030265149.2	23	0.0127232	22	0.0912356
1	NC_044998.1	GPR161	19702188	19712628	0.224509	XM_030265216.2	5	0.104701	4	0.211606
1	NC_044998.1	TIPRL	19714639	19721776	0.187581	XM_004177105.4	7	0.0152993	6	0.14129
1	NC_044998.1	SFT2D2	19724512	19742509	0.178139	XR_003958644.1	8	0.130906	7	0.119442
1	NC_044998.1	TBX19	19742556	19756859	0.189254	XM_030265283.2	9	0.029745	8	0.169977
1	NC_044998.1	LOC100227529	19869263	19873067	0.225064	XM_002190061.5	3	0.0816613	2	0.114493
1	NC_044998.1	DPT	19943934	19970816	0.271335	XM_002193636.4	4	0.116899	3	0.280675
1	NC_044998.1	LOC115493735	19980639	19989656	0.276958	XR_003958651.2	3	0.237038	2	0.279118
1	NC_044998.1	LOC115493737	20018867	20064072	0.199259	XR_003958653.2	3	0.067701	2	0.202229
1	NC_044998.1	ATP1B1	20090063	20104744	0.158701	XM_030265412.2	6	0.0237985	5	0.186272
1	NC_044998.1	NME7	20104054	20193331	0.198001	XM_030265387.2	12	0.0167965	11	0.192739
1	NC_044998.1	BLZF1	20193353	20201667	0.222519	XM_002189816.5	7	0.108679	6	0.182591
1	NC_044998.1	CCDC181	20202314	20211175	0.212118	XM_012569985.3	6	0.0850502	5	0.224877
1	NC_044998.1	SLC19A2	20214903	20227146	0.197243	XM_002189733.4	6	0.10052	5	0.209743
1	NC_044998.1	F5	20233567	20273968	0.223761	XM_030265437.2	23	0.043443	22	0.17654
1	NC_044998.1	ATG3	20274101	20297502	0.177158	XM_030265502.2	12	0.0116156	11	0.174876
1	NC_044998.1	SLC35A5	20297651	20313012	0.338377	XM_030265460.2	7	0.0944586	6	0.349487
1	NC_044998.1	CCDC80	20311366	20332723	0.265302	XM_002193002.5	8	0.0889725	7	0.280474
1	NC_044998.1	LOC100227477	20409680	20428058	0.138762	XM_002189596.3	6	0.063935	5	0.0976698
1	NC_044998.1	LOC115493789	20448989	20463616	0.310013	XM_032746786.1	6	0.105777	5	0.196055
1	NC_044998.1	GTPBP8	20462963	20467770	0.266529	XM_002189502.4	7	0.203953	6	0.230301
1	NC_044998.1	TAF13	20469139	20471444	0.26352	NR_037143.1	4	0.196654	3	0.136342
1	NC_044998.1	NEPRO	20471060	20477559	0.219547	XM_012569962.3	9	0.0645284	8	0.18377
1	NC_044998.1	LOC115493776	20477584	20497995	0.21759	XM_030265556.2	16	0.165407	15	0.2027
1	NC_044998.1	BOC	20561084	20615105	0.216044	XM_030265645.2	20	0.110119	19	0.274436
1	NC_044998.1	CFAP44	20616080	20658434	0.302339	XM_030265616.2	32	0.0977083	31	0.275493
1	NC_044998.1	ILDR1	20658936	20676711	0.267958	XM_030265658.2	8	0.068709	7	0.216123
1	NC_044998.1	LOC100227541	20678479	20681690	0.218789	XM_012569974.3	4	0.161452	3	0.164384
1	NC_044998.1	LOC116807832	20684189	20688166	0.289814	XR_004367010.1	2	0.300845	1	0.26138
1	NC_044998.1	GPR15	20690390	20695787	0.183786	XM_030265663.2	1	0.183786
1	NC_044998.1	CLDND1	20703789	20711993	0.446993	XM_030265698.2	7	0.187721	6	0.274668
1	NC_044998.1	LOC100222730	20730420	20741857	0.317832	XM_030265709.2	4	0.136364	3	0.318121
1	NC_044998.1	LOC115493810	20743750	20753830	0.240694	XM_030265764.2	6	0.122748	5	0.272907
1	NC_044998.1	GRAMD1C	20753874	20806393	0.283193	XM_030265747.2	18	0.0656121	17	0.272735
1	NC_044998.1	ZDHHC23	20807511	20814925	0.278502	XM_012569969.3	4	0.249799	3	0.218673
1	NC_044998.1	CCDC191	20817244	20838459	0.264303	XM_030265777.2	16	0.155182	15	0.266879
1	NC_044998.1	QTRT2	20838537	20852302	0.3759	XM_002191773.4	8	0.122092	7	0.377737
1	NC_044998.1	DRD3	20859716	20873902	0.401784	XM_032746869.1	6	0.244221	5	0.309136
1	NC_044998.1	ZBTB20	20892523	21394453	0.25521	XM_032751074.1	12	0.120949	11	0.255463
1	NC_044998.1	MIR7643	20896951	20897062	-0.0243687	NR_105673.1	4	-0.0121843
1	NC_044998.1	LOC115497411	21225854	21231152	0.211017	XR_003962983.2	3	0.0687134	2	0.210561
1	NC_044998.1	GAP43	21537430	21595851	0.230358	XM_002191159.4	3	0.211949	2	0.223266
1	NC_044998.1	LSAMP	21615602	22628618	0.188967	XM_004177102.4	8	0.0816881	7	0.215557
1	NC_044998.1	LOC116808980	22003961	22028185	0.189054	XR_004369265.1	3	0.208556	2	0.109
1	NC_044998.1	LOC115497419	22521620	22524257	0.0878144	XR_003962995.2	3	0.0454909	2	0.08222
1	NC_044998.1	IGSF11	22964650	23075716	0.166102	XM_030265898.2	7	0.0562851	6	0.227458
1	NC_044998.1	LOC116808576	23075628	23078935	0.178438	XM_032749288.1	3	0.122013	2	0.0842542
1	NC_044998.1	LOC105758692	23111988	23118012	0.364757	XR_004367030.1	5	0.253128	4	0.22177
1	NC_044998.1	UPK1B	23126688	23138535	0.140952	XM_002188761.3	8	0.081448	7	0.081038
1	NC_044998.1	ARHGAP31	23144171	23204890	0.161722	XM_002188738.5	12	0.144131	11	0.128936
1	NC_044998.1	LOC100227480	23255959	23284077	0.129879	XM_030265971.2	6	0.164856	5	0.119724
1	NC_044998.1	LOC100219809	23288349	23305983	0.172639	XM_002189815.5	6	0.0448044	5	0.177695
1	NC_044998.1	B4GALT4	23304735	23332190	0.138306	XM_030265943.2	7	0.122867	6	0.117826
1	NC_044998.1	TMEM39A	23342878	23363169	0.220611	XM_002189681.5	9	0.126792	8	0.199304
1	NC_044998.1	LOC105760670	23362049	23378330	0.157055	XM_030266022.2	20	0.11741	19	0.154869
1	NC_044998.1	CHD1L	23378268	23403049	0.136009	XM_002188495.4	23	0.0667385	22	0.120396
1	NC_044998.1	VANGL1	23408021	23452937	0.184379	XM_030266064.2	8	0.136158	7	0.167187
1	NC_044998.1	CASQ2	23461005	23495812	0.10332	XM_002188476.5	11	0.0861844	10	0.110427
1	NC_044998.1	NHLH2	23530975	23535806	0.131806	XM_030266090.2	3	0.056019	2	0.138863
1	NC_044998.1	LOC116808580	23573308	23580219	0.21709	XM_032749311.1	3	0.0699319	2	0.173106
1	NC_044998.1	SLC22A15	23580027	23619940	0.170936	XM_030266099.2	12	0.110047	11	0.171226
1	NC_044998.1	MAB21L3	23614808	23663142	0.195305	XM_030266117.2	9	0.157247	8	0.204646
1	NC_044998.1	LOC115493868	23657542	23662568	0.139247	XR_003958846.2	4	0.137039	3	0.13913
1	NC_044998.1	LOC116807850	23673011	23676610	0.157504	XR_004367047.1	2	0.122629	1	0.388588
1	NC_044998.1	ATP1A1	23699339	23726298	0.156566	XM_030266142.2	23	0.0738169	22	0.145418
1	NC_044998.1	CD58	23766248	23786925	0.327568	XM_012569957.3	11	0.207158	10	0.283749
1	NC_044998.1	PLA1A	23786789	23807694	0.170311	XM_032746922.1	11	0.114771	10	0.13632
1	NC_044998.1	LOC115493891	23802426	23804514	0.154913	XR_003958872.2	2	0.110768	1	0.15473
1	NC_044998.1	POPDC2	23809732	23821475	0.203836	XM_012569965.3	4	0.0844509	3	0.195187
1	NC_044998.1	LOC100221679	23826342	23828807	0.344813	XM_002188430.4	3	0.0733641	2	0.341325
1	NC_044998.1	LOC116808585	23839307	23842249	0.195309	XM_032749324.1	2	0.0183112	1	0.239625
1	NC_044998.1	LOC115493908	23842269	23861492	0.191611	XR_003958891.2	7	0.162602	6	0.16185
1	NC_044998.1	CFAP91	23842585	23872434	0.187845	XM_030266234.2	16	0.0981527	15	0.182025
1	NC_044998.1	GSK3B	23879554	24028182	0.179354	XM_002187975.5	11	0.0262149	10	0.211449
1	NC_044998.1	GPR156	24045644	24069958	0.127229	XM_030266275.2	11	0.0289215	10	0.11363
1	NC_044998.1	LRRC58	24083464	24100630	0.112145	XM_030266294.2	4	0.0564018	3	0.0996074
1	NC_044998.1	FSTL1	24103156	24155527	0.130988	XM_030266301.2	11	0.0367165	10	0.118315
1	NC_044998.1	LOC115493915	24191915	24200955	0.107644	XR_003958919.2	3	0.145683	2	0.106277
1	NC_044998.1	NDUFB4	24200436	24202775	0.109056	NM_001245123.1	3	0.150341	2	0.124155
1	NC_044998.1	HGD	24206022	24230013	0.177981	XM_030266317.2	14	0.10399	13	0.160338
1	NC_044998.1	RABL3	24236651	24249029	0.173374	XM_002187394.5	8	0.192474	7	0.125505
1	NC_044998.1	GTF2E1	24249168	24297741	0.192668	XM_030266346.2	5	0.255845	4	0.215088
1	NC_044998.1	LOC116807858	24304413	24309239	0.094364	XR_004367070.1	2	0.0861463	1	0.0875483
1	NC_044998.1	STXBP5L	24343104	24520723	0.139483	XM_030266367.2	27	0.0378273	26	0.150963
1	NC_044998.1	POLQ	24521602	24581450	0.145938	XM_012569955.3	30	0.110287	29	0.163343
1	NC_044998.1	METTL16	24582288	24591911	0.300001	XM_030266408.2	9	0.0630364	8	0.192655
1	NC_044998.1	TNFRSF1A	24594351	24612858	0.15622	XM_002187692.4	10	0.132417	9	0.180462
1	NC_044998.1	CTC1	24613482	24628853	0.139006	XM_032746956.1	23	0.0980014	22	0.103706
1	NC_044998.1	VTCN1	24630625	24638916	0.142433	XM_032749351.1	6	0.101033	5	0.0995288
1	NC_044998.1	TRIM45	24645768	24653528	0.131094	XR_004367092.1	5	0.0679654	4	0.11148
1	NC_044998.1	SPICE1	24657335	24682841	0.113013	XM_030266452.2	17	0.0601893	16	0.0976022
1	NC_044998.1	SIDT1	24688371	24728489	0.169853	XM_030266529.2	26	0.0958142	25	0.175091
1	NC_044998.1	USF3	24730755	24764735	0.176744	XM_030266515.2	6	0.110972	5	0.172331
1	NC_044998.1	NAA50	24768379	24789150	0.162268	XM_002186640.5	5	0.0190054	4	0.104664
1	NC_044998.1	ATP6V1A	24789336	24819881	0.232627	XM_030266588.2	16	0.0348644	15	0.247337
1	NC_044998.1	DUSP12	24819189	24823621	0.151939	XM_030266598.2	6	0.0765765	5	0.137419
1	NC_044998.1	TENT5C	24832216	24840715	0.200302	XM_032746996.1	2	0.0946403	1	0.268429
1	NC_044998.1	GDAP2	25374472	25398317	0.0826477	XM_032747011.1	15	0.0619143	14	0.080716
1	NC_044998.1	WDR3	25398316	25417031	0.145776	XM_030266661.2	26	0.0720432	25	0.156442
1	NC_044998.1	SPAG17	25419585	25508917	0.131788	XM_030266626.2	48	0.0641463	47	0.121181
1	NC_044998.1	LOC116807889	25505306	25508754	0.170841	XR_004367143.1	2	0.120418	1	0.316431
1	NC_044998.1	LOC116807888	25508925	25583605	0.188059	XR_004367142.1	5	0.112506	4	0.19321
1	NC_044998.1	LOC115494003	25661275	25675431	0.208396	XR_003959047.2	3	0.148036	2	0.166914
1	NC_044998.1	TBX15	25695329	25783523	0.198529	XM_012569896.3	8	0.0623716	7	0.126757
1	NC_044998.1	WARS2	25802081	25848978	0.153883	XM_030266713.2	8	0.108102	7	0.121056
1	NC_044998.1	HAO2	25928894	25940326	0.283391	XM_002197641.3	8	0.100166	7	0.299585
1	NC_044998.1	HSD3B1	25944716	25953377	0.245322	XM_032749109.1	4	0.217308	3	0.167879
1	NC_044998.1	MAN1A2	25965332	26101878	0.206856	XM_012569883.3	13	0.042649	12	0.217807
1	NC_044998.1	CD86	26118498	26142080	0.277138	XM_030266751.2	6	0.393027	5	0.273824
1	NC_044998.1	CASR	26175334	26249809	0.18214	XM_030266770.2	7	0.203043	6	0.195532
1	NC_044998.1	LOC115494022	26211699	26212970	0.392694	XR_003959082.2	3	0.19632	2	0.19959
1	NC_044998.1	CSTB	26251998	26256811	0.22858	NM_001245857.1	3	0.142395	2	0.230731
1	NC_044998.1	LOC100228799	26256248	26266701	0.277947	XM_002197483.5	3	0.201098	2	0.252682
1	NC_044998.1	LOC116807894	26268155	26268768	0.154209	XR_004367155.1	2	0.0662953	1	0.262918
1	NC_044998.1	CCDC58	26269991	26277887	0.15057	NM_001245808.1	5	0.0809387	4	0.178904
1	NC_044998.1	FAM162A	26277948	26286195	0.130291	XM_002197499.5	5	0.0354467	4	0.129904
1	NC_044998.1	KPNA1	26282654	26340836	0.128759	XM_030266812.2	15	0.062561	14	0.119317
1	NC_044998.1	FBXO40	26342594	26353440	0.202091	XM_030266795.2	3	0.186891	2	0.142396
1	NC_044998.1	LOC116807898	26355178	26357599	0.118125	XR_004367158.1	2	0.0611875	1	0.00828094
1	NC_044998.1	SCNN1A	26380523	26389356	0.123612	XM_002193464.4	13	0.0359168	12	0.063137
1	NC_044998.1	VAMP1	26391020	26398228	0.149775	XM_030266856.2	5	0.104891	4	0.122787
1	NC_044998.1	NCAPD2	26398430	26427693	0.152361	XR_003959091.2	30	0.0958804	29	0.145877
1	NC_044998.1	MRPL51	26400374	26401091	0.116872	NM_001245844.1	2	-0.0037677	1	0.215321
1	NC_044998.1	LOC115497830	26401833	26402156	0.0875472	XR_003963407.2	1	0.0875472
1	NC_044998.1	LOC100226912	26432064	26433987	0.222859	XM_002197309.3	2	0.13018	1	0.214854
1	NC_044998.1	GAPDH	26436215	26440084	0.154422	XM_030266469.2	12	0.059544	11	0.139331
1	NC_044998.1	IFFO1	26451303	26461633	0.131222	XM_030266899.2	10	0.131739	9	0.123358
1	NC_044998.1	NOP2	26468250	26474251	0.131787	XM_030266974.2	16	0.0719048	15	0.105611
1	NC_044998.1	CHD4	26474806	26501552	0.185961	XM_032747071.1	41	0.0885492	40	0.155
1	NC_044998.1	LOC115497825	26478516	26478654	0.140685	XR_003963402.1	1	0.140685
1	NC_044998.1	LPAR5	26512813	26526489	0.123451	XM_030267130.2	4	0.094024	3	0.0414416
1	NC_044998.1	ACRBP	26531447	26542620	0.176207	XM_030267157.2	10	0.112871	9	0.085803
1	NC_044998.1	ING4	26550389	26564880	0.124074	XM_002196916.4	8	0.0911633	7	0.218581
1	NC_044998.1	ZNF384	26567622	26594581	0.218319	XM_030267204.2	12	0.0807947	11	0.159728
1	NC_044998.1	LOC115494245	26596172	26601052	0.0825747	XR_003959164.2	3	-0.000575628	2	0.0735014
1	NC_044998.1	PIANP	26612950	26625605	0.144671	XM_030267223.2	6	0.0661148	5	0.170209
1	NC_044998.1	COPS7A	26633452	26636795	0.146121	XM_004175980.3	7	0.117604	6	0.0937168
1	NC_044998.1	MLF2	26647480	26654216	0.16279	XM_030265427.2	9	0.0664922	8	0.12915
1	NC_044998.1	LOC116807936	26655337	26658811	0.334372	XR_004367243.1	2	0.341932	1	0.121991
1	NC_044998.1	LOC100190249	26662427	26666050	0.175756	NM_001245253.1	5	0.0517261	4	0.207456
1	NC_044998.1	LAG3	26680239	26686764	0.2342	XM_030267234.2	8	0.238597	7	0.178722
1	NC_044998.1	CD4	26695241	26707216	0.177981	XM_030267243.2	10	0.0700509	9	0.189467
1	NC_044998.1	GPR162	26715017	26721302	0.138817	XM_030267262.2	5	0.0590666	4	0.245081
1	NC_044998.1	P3H3	26722037	26733388	0.168941	XM_002192922.4	15	0.127101	14	0.143986
1	NC_044998.1	GNB3	26735790	26745378	0.248732	XM_032747136.1	9	0.102625	8	0.168846
1	NC_044998.1	CDCA3	26745830	26748266	0.274472	XM_030267287.2	5	0.25353	4	0.315958
1	NC_044998.1	USP5	26748593	26763370	0.255332	XM_030267252.2	20	0.0879931	19	0.213392
1	NC_044998.1	TPI1	26763491	26766192	0.1902	NM_001245230.1	8	0.0478322	7	0.103712
1	NC_044998.1	LRRC23	26769405	26775464	0.227914	XM_030267268.2	7	0.239175	6	0.182951
1	NC_044998.1	ENO2	26775580	26785125	0.291991	XM_002196480.4	12	0.16363	11	0.33395
1	NC_044998.1	ATN1	26791059	26812625	0.191523	XM_012569939.3	10	0.127442	9	0.249883
1	NC_044998.1	LOC115497845	26813014	26813074	0.00871727	XR_003963424.1	1	0.00871727
1	NC_044998.1	C1H12orf57	26813130	26813979	0.250614	NM_001245257.1	3	0.179271	2	0.0356882
1	NC_044998.1	PTPN6	26814086	26828533	0.227546	XM_030267323.2	15	0.0887309	14	0.228396
1	NC_044998.1	PHB2	26832111	26838757	0.264929	XM_002192796.4	10	0.103673	9	0.276317
1	NC_044998.1	EMG1	26838879	26842732	0.270963	XM_002196182.3	6	0.243393	5	0.207749
1	NC_044998.1	LPCAT3	26842950	26857214	0.196534	XM_030267338.2	14	0.0780474	13	0.147963
1	NC_044998.1	C1S	26863882	26872515	0.301198	XM_030267375.2	12	0.234659	11	0.246867
1	NC_044998.1	C1R	26871602	26881486	0.229763	XM_030267366.2	11	0.189159	10	0.204398
1	NC_044998.1	RBP5	26886124	26887866	0.28511	XM_002196082.4	4	0.0184012	3	0.286362
1	NC_044998.1	CLSTN3	26888477	26903910	0.230573	XM_030267390.2	18	0.151183	17	0.231854
1	NC_044998.1	LOC100221073	26903877	26912043	0.348047	XM_012569938.3	7	0.13843	6	0.22273
1	NC_044998.1	PEX5	26916117	26927271	0.208909	XM_030267416.2	16	0.0634552	15	0.198738
1	NC_044998.1	LOC100220125	26934146	26936368	0.29979	XM_030267483.2	2	0.179832	1	0.0982741
1	NC_044998.1	LOC100232617	26943615	26949259	0.147172	XM_030267495.2	2	0.234241	1	0.133638
1	NC_044998.1	LOC116807945	26961856	26963499	0.0856212	XM_032747180.1	2	0.050269	1	0.0215854
1	NC_044998.1	LOC100226894	26970027	26972279	0.428749	XM_030267503.2	2	0.113732	1	0.647418
1	NC_044998.1	LOC100228855	26992286	26993599	0.132554	XM_002192283.3	1	0.132554
1	NC_044998.1	EPHA1	27004094	27038593	0.298716	XM_030267537.2	18	0.107535	17	0.270786
1	NC_044998.1	ZYX	27042073	27070961	0.195743	XM_030267572.2	10	0.0945738	9	0.141894
1	NC_044998.1	FAM131B	27070919	27104079	0.280793	XM_030267605.2	7	0.186391	6	0.288212
1	NC_044998.1	CLCN1	27109459	27165741	0.291897	XM_030267516.2	23	0.116551	22	0.290172
1	NC_044998.1	CASP2	27170078	27188998	0.330695	XM_002192031.5	10	0.226865	9	0.324633
1	NC_044998.1	TMEM139	27190386	27195358	0.314874	XM_030267629.2	4	0.278305	3	0.305071
1	NC_044998.1	LOC100230753	27210022	27258580	0.324171	XM_030267674.2	21	0.0616008	20	0.272607
1	NC_044998.1	GSTK1	27254524	27262042	0.342668	XM_002191997.5	8	0.121755	7	0.172812
1	NC_044998.1	LOC100226962	27264070	27281766	0.248071	XM_030267770.2	16	0.196884	15	0.230535
1	NC_044998.1	LOC105758679	27292709	27293858	0.253234	XM_012569869.3	1	0.253234
1	NC_044998.1	LOC105758678	27295960	27296895	0.20565	XM_012569868.3	1	0.20565
1	NC_044998.1	LOC105758677	27302132	27303599	0.149625	XM_012569867.3	1	0.149625
1	NC_044998.1	KEL	27313850	27336803	0.269928	XM_030267781.2	19	0.105702	18	0.260212
1	NC_044998.1	LOC100220191	27358911	27384297	0.28676	XM_002191886.3	15	0.127967	14	0.281949
1	NC_044998.1	EPHB6	27429602	27502800	0.239688	XM_002195043.5	17	0.108296	16	0.245168
1	NC_044998.1	LOC101233739	27530809	27538587	0.215063	LOC101233739	6	-0.00212204	5	0.119809
1	NC_044998.1	LOC115497448	27543247	27573341	0.256904	LOC115497448	7	0.0493961	6	0.1574
1	NC_044998.1	LOC115497452	27554765	27555367	0.0285589	LOC115497452	2	0.0142829	1	0.022582
1	NC_044998.1	LOC116808992	27558069	27559454	0.375949	LOC116808992	2	0.187974	1	0
1	NC_044998.1	PRSS2	27567785	27571042	0.216869	XM_012569944.3	5	0.0966747	4	0.084225
1	NC_044998.1	LOC115497447	27574726	27582375	0.0907435	XM_032751163.1	2	0.0928516	1	0.0610682
1	NC_044998.1	LOC116808996	27599905	27601519	0.117499	LOC116808996	2	0.0871784	1	0.183607
1	NC_044998.1	LOC101233700	27613217	27618001	0.12729	LOC101233700	3	0.0234104	2	0.0818729
1	NC_044998.1	LOC100224083	27619639	27680707	0.23449	XM_032751152.1	6	0.0319887	5	0.133665
1	NC_044998.1	PRMT8	27678769	27736151	0.284779	XM_002194525.5	11	0.0635988	10	0.263032
1	NC_044998.1	CRACR2A	27748709	27802361	0.270401	XM_030285994.2	19	0.135659	18	0.240771
1	NC_044998.1	PARP11	27813196	27827505	0.246375	XM_002191419.5	8	0.0397853	7	0.22807
1	NC_044998.1	TSPAN9	27835916	28005652	0.319776	XM_030267842.2	7	0.107907	6	0.264751
1	NC_044998.1	LOC115494328	27842537	27847916	0.2492	XR_003959309.2	2	0.395859	1	0.238432
1	NC_044998.1	TEAD4	28012672	28055180	0.218797	XM_032751171.1	14	0.0205624	13	0.236291
1	NC_044998.1	TULP3	28058711	28091031	0.268079	XM_004175974.4	11	0.147444	10	0.322442
1	NC_044998.1	RHNO1	28091228	28094368	0.285865	XM_002191190.4	2	0.299222	1	0.332099
1	NC_044998.1	FOXM1	28091365	28109097	0.25766	XM_030267932.2	9	0.241273	8	0.26125
1	NC_044998.1	NRIP2	28114750	28134259	0.332705	XM_012569863.3	6	0.236434	5	0.365963
1	NC_044998.1	ITFG2	28133193	28145415	0.235824	XM_004175973.4	12	0.137128	11	0.251772
1	NC_044998.1	FKBP4	28145472	28166106	0.170232	XM_030267977.2	10	0.0703639	9	0.141004
1	NC_044998.1	TCAF2	28166134	28188939	0.254077	XM_030267966.2	9	0.188998	8	0.301467
1	NC_044998.1	LOC101233542	28190984	28201702	0.351167	XR_003959340.2	8	0.134853	7	0.27615
1	NC_044998.1	LOC101233523	28206737	28211690	0.343169	XM_012569860.3	6	0.0601125	5	0.051364
1	NC_044998.1	LOC115494350	28214767	28219433	0.35077	XM_030268066.2	6	0.0671436	5	0.226827
1	NC_044998.1	LOC101233586	28223671	28241650	0.499621	XM_030268000.2	7	0.130726	6	0.303513
1	NC_044998.1	NECAP1	28241791	28248538	0.21975	XM_002193463.5	8	0.073344	7	0.167721
1	NC_044998.1	C3AR1	28249653	28259122	0.207702	XM_004186148.4	2	0.123792	1	0.269195
1	NC_044998.1	FOXJ2	28258533	28285733	0.231306	XM_030268083.2	11	0.0590932	10	0.259178
1	NC_044998.1	LOC100224972	28320347	28331869	0.205913	XM_002190755.5	10	0.10521	9	0.134897
1	NC_044998.1	LOC100227862	28351213	28358242	0.0966221	XM_002190730.4	4	0.0636221	3	0.0943279
1	NC_044998.1	LOC100230680	28362237	28366883	0.159056	XM_002190696.4	4	0.139676	3	0.117443
1	NC_044998.1	LOC101233449	28392134	28413296	0.159643	XM_032749425.1	9	0.101322	8	0.158856
1	NC_044998.1	AICDA	28416604	28423023	0.146859	XM_030268134.2	5	0.100754	4	0.103824
1	NC_044998.1	MFAP5	28431702	28444633	0.170256	XM_030268140.2	9	0.0157941	8	0.212436
1	NC_044998.1	RIMKLB	28457793	28508485	0.171242	XM_030268147.2	9	0.111796	8	0.162919
1	NC_044998.1	LOC100225878	28529453	28551193	0.18951	XM_032747290.1	30	0.15663	29	0.157428
1	NC_044998.1	LOC100228861	28554975	28581052	0.136987	XM_032747307.1	36	0.0934923	35	0.117623
1	NC_044998.1	LOC100231773	28577162	28601891	0.148118	XR_003959374.2	36	0.110804	35	0.135317
1	NC_044998.1	LOC100219283	28603091	28631843	0.17285	XM_030268287.2	37	0.0772685	36	0.140316
1	NC_044998.1	PHC1	28637798	28655563	0.186609	XM_030268245.2	16	0.0818757	15	0.173449
1	NC_044998.1	M6PR	28655889	28661439	0.118166	XM_002190252.5	7	0.0654883	6	0.0941357
1	NC_044998.1	KLRG1	28664874	28674969	0.0901113	XM_004175970.4	5	0.111672	4	0.0998926
1	NC_044998.1	A2M	28677604	28707068	0.183257	XM_030268194.2	36	0.109805	35	0.165629
1	NC_044998.1	LOC100190538	28738693	28745572	0.154521	NM_001245344.1	5	0.148202	4	0.138191
1	NC_044998.1	LOC115494384	28744702	28748030	0.224428	XR_003959390.2	2	0.197993	1	0.24421
1	NC_044998.1	LOC105758686	28753027	28778667	0.111598	XM_012569918.3	36	0.117409	35	0.110984
1	NC_044998.1	LOC100224071	28787372	28814553	0.138504	XM_032747310.1	35	0.0840768	34	0.1393
1	NC_044998.1	LOC100226970	28847829	28861341	0.112607	XM_002190060.3	3	0.0859689	2	0.0635005
1	NC_044998.1	GUCY2F	28872843	28913292	0.198646	XM_030268324.2	18	0.107179	17	0.173548
1	NC_044998.1	LOC115497764	28958480	28971647	0.0906106	XR_003963355.2	3	0.0233247	2	0.128644
1	NC_044998.1	TSKU	28992646	29011188	0.145167	XM_030268336.2	2	0.20225	1	0.100936
1	NC_044998.1	ACER3	29051776	29108035	0.172509	XM_030268378.2	11	0.0402345	10	0.178968
1	NC_044998.1	CAPN5	29137768	29174426	0.146095	XM_032747319.1	12	0.210606	11	0.182419
1	NC_044998.1	OMP	29155997	29161072	0.126799	XM_030268409.2	1	0.126799
1	NC_044998.1	MYO7A	29177976	29275877	0.158835	XM_030268419.2	51	0.0807258	50	0.163533
1	NC_044998.1	GDPD4	29276953	29314721	0.171584	XM_030268463.2	16	0.102512	15	0.193601
1	NC_044998.1	PAK1	29322275	29398155	0.116822	XM_030268096.2	17	0.0636889	16	0.10205
1	NC_044998.1	AQP11	29423672	29436117	0.203564	XM_032747326.1	3	0.150212	2	0.18738
1	NC_044998.1	CLNS1A	29438169	29451273	0.147476	XM_004175968.4	7	0.194797	6	0.160129
1	NC_044998.1	RSF1	29454693	29518859	0.167552	XM_030268528.2	16	0.114977	15	0.207753
1	NC_044998.1	AAMDC	29519016	29528890	0.172137	XM_030268572.2	4	0.0905964	3	0.116265
1	NC_044998.1	INTS4	29533740	29566215	0.258667	XM_002190754.5	23	0.112719	22	0.237845
1	NC_044998.1	KCTD14	29568467	29573113	0.133303	XM_030268594.2	2	0.144044	1	0.0748179
1	NC_044998.1	NDUFC2	29619445	29621434	0.0742769	NM_001198997.2	3	0.0446996	2	0.0707559
1	NC_044998.1	ALG8	29623750	29635023	0.136287	XM_002189537.5	13	0.0868742	12	0.126279
1	NC_044998.1	KCTD21	29636158	29650156	0.172587	XM_030268725.2	2	0.204096	1	0.195987
1	NC_044998.1	USP35	29650140	29676196	0.119544	XM_030268669.2	11	0.0450121	10	0.124207
1	NC_044998.1	GAB2	29677874	29770097	0.174915	XM_002189363.5	10	0.172426	9	0.196029
1	NC_044998.1	LOC115494447	29738498	29741339	0.177968	XR_003959465.2	3	0.0591958	2	0.168504
1	NC_044998.1	NARS2	29782086	29830442	0.206704	XM_002190220.5	14	0.118631	13	0.166882
1	NC_044998.1	TENM4	29891035	31423624	0.221728	XM_030286185.2	40	0.0965057	39	0.189035
1	NC_044998.1	LOC115497525	31282584	31285249	0.215484	LOC115497525	1	0.215484
1	NC_044998.1	LOC115494459	31714692	31778293	0.229555	XR_003959482.2	3	0.258471	2	0.185885
1	NC_044998.1	HIKESHI	31827507	31837112	0.207051	XM_032751054.1	5	0.0830545	4	0.1827
1	NC_044998.1	EED	31842611	31860682	0.108681	XM_002189501.4	12	0.0480484	11	0.0767645
1	NC_044998.1	PICALM	31908798	31974520	0.180319	XM_012569911.3	23	0.0366009	22	0.160162
1	NC_044998.1	CCDC83	31979382	31997435	0.20113	XM_030286338.2	10	0.131889	9	0.194708
1	NC_044998.1	SYTL2	32000619	32058278	0.216864	XM_030286350.2	19	0.0723803	18	0.129671
1	NC_044998.1	CCDC89	32058424	32063617	0.065558	XM_030286420.2	5	0.0750751	4	0.00876599
1	NC_044998.1	CREBZF	32065931	32073812	0.107764	XR_004369331.1	2	0.0986285	1	0.282672
1	NC_044998.1	LOC100222067	32074143	32079733	0.153219	XM_002188843.5	5	0.0507672	4	0.147216
1	NC_044998.1	DLG2	32079761	33070334	0.178871	XM_030286703.2	30	0.0690376	29	0.176679
1	NC_044998.1	LOC115497569	32125754	32140067	0.119433	XR_004369335.1	2	0	1	0
1	NC_044998.1	CCDC90B	33136231	33146773	0.080617	XM_012569948.3	9	0.0720474	8	0.0687625
1	NC_044998.1	LOC116808061	33157087	33158020	0.0908829	XR_004367387.1	2	0.108485	1	0.185038
1	NC_044998.1	ANKRD42	33160456	33177269	0.15992	XM_030268835.2	14	0.153109	13	0.122003
1	NC_044998.1	PCF11	33178665	33199789	0.0997874	XM_030268819.2	15	0.0474548	14	0.0898681
1	NC_044998.1	LOC115494481	33202548	33221518	0.148131	XR_003959512.2	2	0.23371	1	0.13843
1	NC_044998.1	RAB30	33228201	33276632	0.20249	XM_002187720.4	5	0.111994	4	0.152535
1	NC_044998.1	DDIAS	33278198	33289853	0.179505	XM_030268914.2	5	0.0603063	4	0.208811
1	NC_044998.1	PRCP	33290169	33319977	0.222039	XM_002188525.5	9	0.138304	8	0.220231
1	NC_044998.1	FAM181B	33344099	33346051	0.0522711	XM_030268959.2	1	0.0522711
1	NC_044998.1	ME3	33354037	33471834	0.210493	XM_030268965.2	14	0.122688	13	0.216281
1	NC_044998.1	LOC115494496	33444073	33448714	0.0700576	XR_003959537.2	3	0.104496	2	0.067851
1	NC_044998.1	LOC116808068	33469038	33471613	0.182308	XR_004367398.1	2	0.074648	1	0.258362
1	NC_044998.1	LOC115497765	33485605	33487243	0.196279	XR_003963357.2	2	0.313817	1	0.156448
1	NC_044998.1	PRSS23	33513465	33521609	0.20381	XM_030268986.2	2	0.098853	1	0.227163
1	NC_044998.1	FZD4	33586126	33592116	0.156517	XM_030268998.2	2	0.0821313	1	0.209028
1	NC_044998.1	TMEM135	33610989	33769521	0.212692	XM_030269009.2	15	0.0579216	14	0.193068
1	NC_044998.1	RAB38	33998055	34033642	0.200082	XM_002188346.4	4	0.252483	3	0.178686
1	NC_044998.1	CTSC	34034906	34051556	0.137066	XM_030269109.2	7	0.0650735	6	0.190648
1	NC_044998.1	GRM5	34093012	34331994	0.23552	XM_030269055.2	10	0.142613	9	0.238379
1	NC_044998.1	TYR	34358229	34401378	0.163768	XM_002186685.5	5	0.212885	4	0.163588
1	NC_044998.1	NOX4	34409691	34517218	0.211128	XM_030269162.2	17	0.0503685	16	0.200015
1	NC_044998.1	LOC116808081	34521291	34526701	0.18952	XR_004367430.1	2	0.150363	1	0.197621
1	NC_044998.1	LOC100223080	34590220	34616196	0.210488	XM_030269187.2	19	0.127991	18	0.187098
1	NC_044998.1	LOC100225953	34621849	34651335	0.206134	XR_004367452.1	18	0.17607	17	0.202172
1	NC_044998.1	CHORDC1	34658440	34675074	0.171148	XM_002186511.5	11	0.0590477	10	0.18892
1	NC_044998.1	FAT3	35350006	35744070	0.176615	XM_030269237.2	29	0.0937999	28	0.152246
1	NC_044998.1	MTNR1B	35853263	35875092	0.290968	NM_001048258.1	2	0.0430299	1	0.293618
1	NC_044998.1	LOC100226294	35908241	35923748	0.271753	XM_030269285.2	19	0.196549	18	0.19361
1	NC_044998.1	SLC36A4	35961751	36050066	0.145814	XM_030269316.2	11	0.194454	10	0.166131
1	NC_044998.1	DEUP1	36116502	36160443	0.19906	XM_032747460.1	14	0.142661	13	0.206735
1	NC_044998.1	SMCO4	36164825	36181634	0.319632	NM_001164338.1	2	0.0992744	1	0.324284
1	NC_044998.1	CEP295	36217344	36260031	0.207707	XM_032747467.1	29	0.136173	28	0.18489
1	NC_044998.1	LOC115497816	36248206	36248289	0.00585302	XR_003963399.1	1	0.00585302
1	NC_044998.1	TAF1D	36259645	36273450	0.115279	XM_030269367.2	14	0.0825166	13	0.104213
1	NC_044998.1	LOC115497799	36261685	36261814	0.0493351	XR_003963393.1	1	0.0493351
1	NC_044998.1	LOC115497798	36262968	36263106	0.140484	XR_003963392.1	1	0.140484
1	NC_044998.1	LOC115497806	36263805	36263936	-0.0461295	XR_003963397.2	1	-0.0461295
1	NC_044998.1	LOC115497791	36264608	36264680	0	XR_003963387.1	1	0
1	NC_044998.1	LOC115497800	36265373	36265504	0	XR_003963394.2	1	0
1	NC_044998.1	LOC115497795	36265889	36266027	0	XR_003963391.1	1	0
1	NC_044998.1	LOC115497823	36266330	36266456	-0.00992273	XR_003963400.1	1	-0.00992273
1	NC_044998.1	C1H11orf54	36273545	36285096	0.174278	XM_030269429.2	9	0.121932	8	0.175207
1	NC_044998.1	MED17	36285562	36299726	0.168186	XM_002200111.4	12	0.106006	11	0.201806
1	NC_044998.1	VSTM5	36300606	36307091	0.192115	XM_030269444.2	4	0.196015	3	0.196596
1	NC_044998.1	LOC115494606	36318319	36319411	0.131276	XM_030269452.2	1	0.131276
1	NC_044998.1	LOC100223483	36321435	36323011	0.0799414	XM_030285232.2	3	0.0567926	2	0.0956852
1	NC_044998.1	LOC100226358	36329986	36348085	0.130726	XM_030269464.2	6	0.179466	5	0.101993
1	NC_044998.1	HEPHL1	36362341	36395420	0.184913	XM_030269477.2	20	0.141748	19	0.177227
1	NC_044998.1	PANX1	36398046	36418800	0.266537	XM_030269487.2	5	0.257833	4	0.266177
1	NC_044998.1	GPR83	36424930	36430861	0.21614	XM_030269500.2	4	0.166957	3	0.2152
1	NC_044998.1	MRE11	36433417	36457805	0.21131	XM_030269516.2	19	0.096258	18	0.199893
1	NC_044998.1	ANKRD49	36454147	36456318	0.224496	XM_030263845.2	3	0.28239	2	0.158948
1	NC_044998.1	C1H11orf97	36456422	36461855	0.268392	XM_030269556.2	4	0.127061	3	0.218043
1	NC_044998.1	FUT4	36470205	36482551	0.213865	XM_030269548.2	1	0.213865
1	NC_044998.1	AMOTL1	36536442	36590949	0.189225	XM_030269574.2	13	0.0713434	12	0.206286
1	NC_044998.1	CWC15	36602225	36617563	0.189535	NM_001245207.1	7	0.127609	6	0.181151
1	NC_044998.1	ENDOD1	36630261	36640761	0.202831	XM_030269617.2	2	0.227092	1	0.164534
1	NC_044998.1	SESN3	36647148	36692490	0.278262	XM_030269602.2	10	0.0481788	9	0.350351
1	NC_044998.1	FAM76B	36823901	36836968	0.186239	XM_002198271.5	10	0.10701	9	0.167376
1	NC_044998.1	CEP57	36837105	36859181	0.187856	XM_032747531.1	11	0.103451	10	0.141906
1	NC_044998.1	MTMR2	36859364	36934874	0.16646	XM_030269632.2	15	0.0902591	14	0.14358
1	NC_044998.1	MAML2	36950103	37160513	0.278563	XM_030269692.2	5	0.155565	4	0.218522
1	NC_044998.1	LOC115494624	37161730	37169689	0.306406	XR_003959691.2	2	0.216936	1	0.380474
1	NC_044998.1	CCDC82	37169429	37180992	0.421114	XM_030269703.2	8	0.174233	7	0.456891
1	NC_044998.1	LOC116808110	37224723	37252187	0.280625	XR_004367509.1	2	0.195556	1	0.28905
1	NC_044998.1	LOC116808111	37333944	37338757	0.0304442	XR_004367510.1	3	0	2	0.0152221
1	NC_044998.1	LOC115494625	37805472	37816993	0.335271	XR_004367511.1	4	0.183351	3	0.25419
1	NC_044998.1	LOC116808112	37819815	37834189	0.29796	XR_004367513.1	4	0.229904	3	0.319423
1	NC_044998.1	CNTN5	38041204	38634653	0.215493	XM_030269747.2	26	0.0970981	25	0.237846
1	NC_044998.1	ARHGAP42	38721843	38864480	0.199986	XM_030269749.2	24	0.0590103	23	0.166746
1	NC_044998.1	PGR	38876576	38909371	0.207141	XM_030269756.2	8	0.104164	7	0.210057
1	NC_044998.1	TRPC6	38975298	39054905	0.199409	XM_002198089.5	12	0.0916308	11	0.210518
1	NC_044998.1	ANGPTL5	39175465	39188498	0.174255	XM_002198063.4	8	0.069389	7	0.16858
1	NC_044998.1	CEP126	39191505	39229158	0.221491	XM_030269844.2	7	0.0878437	6	0.175921
1	NC_044998.1	CFAP300	39256268	39277240	0.244305	XM_002199971.3	7	0.10605	6	0.211488
1	NC_044998.1	YAP1	39277696	39365004	0.185632	XM_030269891.2	9	0.0793	8	0.218844
1	NC_044998.1	LOC116808933	39394811	39398931	0.259035	XM_032750905.1	3	0.143964	2	0.28688
1	NC_044998.1	BIRC2	39397293	39407492	0.227526	XM_012569794.3	9	0.0784137	8	0.211363
1	NC_044998.1	TMEM123	39410221	39426613	0.279208	XM_032747657.1	6	0.177044	5	0.270428
1	NC_044998.1	MMP7	39437626	39441756	0.19111	XM_002198013.5	6	0.152362	5	0.155882
1	NC_044998.1	LOC100218668	39486046	39492802	0.173003	XM_002199943.3	10	0.101915	9	0.221178
1	NC_044998.1	LOC100218575	39497531	39504956	0.112316	XM_002198008.5	10	0.0977067	9	0.110883
1	NC_044998.1	LOC100221422	39514650	39520240	0.255791	XM_032750907.1	9	0.143464	8	0.196857
1	NC_044998.1	LOC100227226	39526258	39532688	0.195938	XM_012569729.3	10	0.0913466	9	0.196504
1	NC_044998.1	LOC100217703	39556575	39569329	0.175435	XM_030269950.2	10	0.094188	9	0.151692
1	NC_044998.1	DCUN1D5	39600063	39616515	0.19842	XM_030274739.2	8	0.0134209	7	0.192352
1	NC_044998.1	DYNC2H1	39617117	39760344	0.18814	XM_030269960.2	89	0.11211	88	0.174052
1	NC_044998.1	PDGFD	39913388	40049346	0.151122	XM_002199896.5	7	0.111424	6	0.176812
1	NC_044998.1	LOC115494715	40332853	40345562	0.0920995	XR_004367539.1	4	0.0052371	3	0.064351
1	NC_044998.1	LOC115494719	40392182	40403685	0.119283	XR_003959768.2	2	0.139756	1	0.0806144
1	NC_044998.1	LOC115494722	40437899	40440580	0.135352	XR_003959771.2	2	0.156551	1	0.125104
1	NC_044998.1	GRIA4	40495756	40707649	0.153145	XM_012569742.3	10	0.0713385	9	0.0935904
1	NC_044998.1	MIR2985-2	40665161	40665241	0.0160717	NR_048994.1	1	0.0160717
1	NC_044998.1	LOC116808143	40677392	40677925	0.308776	XR_004367557.1	2	0.32834	1	0.289665
1	NC_044998.1	MSANTD4	40730700	40739059	0.209694	XM_032747740.1	3	0.202796	2	0.123658
1	NC_044998.1	KBTBD3	40740329	40757118	0.163776	XM_030270034.2	2	0.199652	1	0.111992
1	NC_044998.1	AASDHPPT	40756758	40786897	0.153614	XM_030270126.2	6	0.069992	5	0.175825
1	NC_044998.1	GUCY1A2	40912398	41062399	0.212342	XM_030270145.2	8	0.165065	7	0.196134
1	NC_044998.1	VMO1	41113828	41117399	0.206132	XM_032747779.1	3	0.215602	2	0.138777
1	NC_044998.1	LOC115497308	41130630	41134984	0.197083	LOC115497308	4	0.0957475	3	0.206131
1	NC_044998.1	CWF19L2	41143074	41218448	0.166094	XM_032747780.1	19	0.0713024	18	0.187362
1	NC_044998.1	ALKBH8	41228862	41276452	0.179273	XM_030270173.2	13	0.141338	12	0.19138
1	NC_044998.1	ELMOD1	41286184	41334395	0.145134	XM_030270211.2	12	0.0765333	11	0.132122
1	NC_044998.1	SLN	41351956	41353773	0.21342	XM_030270303.2	2	0.159702	1	0.252174
1	NC_044998.1	SLC35F2	41390109	41411353	0.190534	XM_030270315.2	8	0.058664	7	0.142938
1	NC_044998.1	RAB39A	41432778	41442666	0.409845	XM_030270325.2	2	0.153584	1	0.425203
1	NC_044998.1	LOC116808166	41442386	41447271	0.1727	XR_004367605.1	2	0.173772	1	0.173079
1	NC_044998.1	CUL5	41449855	41481549	0.212115	XM_030270345.2	19	0.0746931	18	0.191852
1	NC_044998.1	ACAT1	41485124	41499944	0.13718	XM_030270415.2	12	0.0296383	11	0.153567
1	NC_044998.1	LOC100227231	41500418	41523507	0.195963	XM_030270380.2	18	0.0866186	17	0.185733
1	NC_044998.1	ATM	41523503	41582020	0.154741	XM_030270360.2	63	0.081519	62	0.144295
1	NC_044998.1	POGLUT3	41595767	41610179	0.219656	XM_030270428.2	8	0.140346	7	0.219804
1	NC_044998.1	EXPH5	41613651	41650766	0.2567	XM_012569693.3	6	0.153977	5	0.242424
1	NC_044998.1	DDX10	41680460	41834148	0.175654	XM_032747825.1	19	0.106799	18	0.198842
1	NC_044998.1	LOC115494860	41803155	41805640	0.182743	XR_003959878.2	2	0.202176	1	0.052729
1	NC_044998.1	C1H11orf87	41916992	42106135	0.180177	XR_003959889.2	2	0.210574	1	0.105486
1	NC_044998.1	SLITRK6	42147569	42158402	0.318735	XM_002197678.5	2	0.325548	1	0.328472
1	NC_044998.1	LOC115494880	42390998	42396829	0.2027	XR_003959900.2	2	0.176785	1	0.213405
1	NC_044998.1	LOC115494885	42865083	42913349	0.226098	XR_003959905.2	3	0.218438	2	0.298152
1	NC_044998.1	LOC115494887	43015727	43101650	0.26452	XR_003959917.2	6	0.0658095	5	0.324096
1	NC_044998.1	SLITRK1	43103114	43106984	0.224007	XM_002199675.5	1	0.224007
1	NC_044998.1	LOC115497767	43274478	43278814	0.422304	XR_003963358.2	3	0.0666638	2	0.382093
1	NC_044998.1	LOC115494899	43485915	43508351	0.273333	XR_003959920.2	3	0.181868	2	0.288515
1	NC_044998.1	LOC115494903	43884124	43951355	0.337766	XR_003959921.2	3	0.301012	2	0.325426
1	NC_044998.1	LOC115494904	44383249	44397551	0.343827	XR_003959922.2	3	0.417288	2	0.32135
1	NC_044998.1	SPRY2	44500204	44506837	0.382895	XM_002199641.5	2	0.395253	1	0.373801
1	NC_044998.1	LOC115497770	44571031	44572077	0.323312	XR_003963359.2	2	0.342919	1	0.0723503
1	NC_044998.1	LOC116808177	44771339	44779669	0.275059	XR_004367630.1	2	0.245478	1	0.16757
1	NC_044998.1	NDFIP2	44818031	44863965	0.209298	XM_030270608.2	9	0.0560041	8	0.202973
1	NC_044998.1	RBM26	44900871	44951434	0.282693	XM_030270627.2	22	0.10714	21	0.318009
1	NC_044998.1	OBI1	45244705	45267558	0.345743	XM_002199598.5	6	0.071028	5	0.36044
1	NC_044998.1	POU4F1	45276213	45278629	0.0461338	XM_030270695.2	2	0.0555237	1	0.034764
1	NC_044998.1	EDNRB	45644661	45662463	0.180235	XM_004186104.4	8	0.0883657	7	0.176947
1	NC_044998.1	SLAIN1	45718201	45763075	0.303753	XM_030270714.2	8	0.219242	7	0.28325
1	NC_044998.1	LOC115494932	45771240	45781691	0.340762	XR_004367641.1	3	0.322092	2	0.334272
1	NC_044998.1	SCEL	45773348	45842450	0.325373	XM_030270753.2	19	0.214912	18	0.331031
1	NC_044998.1	MYCBP2	45917881	46091375	0.245016	XM_030270789.2	86	0.0527561	85	0.205461
1	NC_044998.1	FBXL3	46100017	46117487	0.200489	XM_002199524.5	5	0.0865149	4	0.196854
1	NC_044998.1	CLN5	46119799	46128768	0.230556	XM_002197333.3	4	0.236294	3	0.277727
1	NC_044998.1	LOC100222462	46134433	46140262	0.414984	XM_002199499.4	4	0.226777	3	0.427005
1	NC_044998.1	ACOD1	46139822	46153653	0.244536	XM_030270934.2	6	0.206848	5	0.280966
1	NC_044998.1	KCTD12	46173538	46178172	0.24357	XM_004175070.4	1	0.24357
1	NC_044998.1	LOC116808191	46243633	46248038	0.351295	XR_004367642.1	4	0.332882	3	0.32137
1	NC_044998.1	LOC115494956	46340579	46352550	0.394047	XR_003959997.2	3	0.572672	2	0.341344
1	NC_044998.1	LMO7	46447147	46579496	0.280421	XM_030271004.2	35	0.0765622	34	0.278447
1	NC_044998.1	UCHL3	46581779	46626389	0.24885	XM_002199439.5	9	0.0519639	8	0.200413
1	NC_044998.1	COMMD6	46627172	46644530	0.213461	XM_032748011.1	7	0.098937	6	0.197665
1	NC_044998.1	TBC1D4	46634805	46744436	0.25572	XM_030271286.2	21	0.139449	20	0.290509
1	NC_044998.1	LOC116808216	46990378	47020952	0.212198	XR_004367689.1	2	0.217054	1	0.173073
1	NC_044998.1	KLF12	47065852	47299051	0.169658	XM_030271373.2	9	0.0371782	8	0.17728
1	NC_044998.1	LOC115494990	47379724	47388864	0.310755	XR_003960048.2	4	0.11003	3	0.271536
1	NC_044998.1	KLF5	47489570	47508286	0.200142	XM_012569716.3	4	0.120795	3	0.22409
1	NC_044998.1	PIBF1	47525041	47630142	0.11959	XM_002199394.5	18	0.0294174	17	0.120031
1	NC_044998.1	DIS3	47630062	47649757	0.183229	XM_002197177.5	21	0.131587	20	0.16825
1	NC_044998.1	BORA	47649310	47667222	0.179418	XM_012569736.3	13	0.035514	12	0.18702
1	NC_044998.1	MZT1	47667471	47671601	0.118747	NM_001164349.1	3	0.0583511	2	0.123981
1	NC_044998.1	LOC115495004	48023279	48025085	0.137994	XR_003960067.2	2	0.275839	1	0.0788736
1	NC_044998.1	DACH1	48030309	48383089	0.215263	XM_030271469.2	12	0.0658561	11	0.235656
1	NC_044998.1	MIR1743	48050672	48050774	0	NR_105663.1	3	0
1	NC_044998.1	LOC115495008	48676712	48684033	0.24754	XR_003960072.2	3	0.335124	2	0.301038
1	NC_044998.1	LOC115495011	48934595	48948319	0.185638	XR_003960077.2	4	0.211542	3	0.174432
1	NC_044998.1	KLHL1	48949030	49132967	0.307419	XM_030271533.2	11	0.120229	10	0.318272
1	NC_044998.1	LOC115495013	49031301	49039687	0.212409	XR_003960078.2	3	0.304464	2	0.400054
1	NC_044998.1	PCDH9	50130780	50800089	0.16246	XM_032751407.1	3	0.121089	2	0.15664
1	NC_044998.1	LOC115495014	51849055	51872417	0.204459	XR_004367706.1	4	0.206268	3	0.271766
1	NC_044998.1	LOC115495016	51897985	51942346	0.166982	XR_004367711.1	6	0.0906626	5	0.137503
1	NC_044998.1	LOC115495018	52118665	52122676	0.0356204	XR_003960089.2	3	0.0352463	2	0.0327208
1	NC_044998.1	LOC116808221	52390413	52411990	0.136031	XR_004367713.1	4	0.0520155	3	0.132788
1	NC_044998.1	PCDH20	52633349	52640614	0.187155	XM_002196655.5	2	0.111451	1	0.257424
1	NC_044998.1	LOC116808224	52888407	52902588	0.297503	XR_004367718.1	2	0.24581	1	0.340773
1	NC_044998.1	TDRD3	52906144	53011486	0.184125	XM_030271611.2	14	0.0381016	13	0.158495
1	NC_044998.1	DIAPH3	53086944	53285133	0.182675	XM_030271637.2	29	0.0534513	28	0.195927
1	NC_044998.1	LOC115495036	53431189	53446482	0.178902	XR_003960104.2	4	0.108772	3	0.122824
1	NC_044998.1	LOC116808227	53479092	53501867	0.105948	XR_004367722.1	4	0.0615623	3	0.104161
1	NC_044998.1	PCDH17	54024621	54115041	0.227988	XM_030271689.2	6	0.090853	5	0.20196
1	NC_044998.1	LOC115495045	54120528	54151122	0.192075	XR_003960116.2	2	0.227839	1	0.382691
1	NC_044998.1	LOC115495046	55166328	55172976	0.265825	XR_003960117.2	4	0.329459	3	0.256987
1	NC_044998.1	LOC115495047	55300930	55310293	0.248029	XR_003960119.2	3	0.14723	2	0.307335
1	NC_044998.1	LOC115491104	55478568	55486267	0.200325	XM_030258362.2	2	0	1	0.200325
1	NC_044998.1	LOC116808230	55479376	55481558	0.200325	XM_032748105.1	2	0.100163	1	0
1	NC_044998.1	LOC115495049	55603090	55700928	0.357275	XR_003960127.2	7	0.249017	6	0.371285
1	NC_044998.1	LOC115495054	55933066	55937273	0.285315	XR_003960130.2	2	0.333496	1	0.265996
1	NC_044998.1	OLFM4	56003914	56052114	0.178049	XM_030271802.2	7	0.118715	6	0.179082
1	NC_044998.1	PCDH8	56114537	56118911	0.482292	XM_002199067.4	3	0.261476	2	0.253788
1	NC_044998.1	CNMD	56140312	56155062	0.347564	XM_030271841.2	7	0.0849915	6	0.328508
1	NC_044998.1	SUGT1	56158780	56184871	0.252096	XM_030271851.2	13	0.0700716	12	0.264154
1	NC_044998.1	ELF1	56187374	56275936	0.235191	XM_030271893.2	9	0.210296	8	0.29861
1	NC_044998.1	LOC115495071	56203414	56206896	0.184859	XR_003960175.1	4	0.0210733	3	0.202057
1	NC_044998.1	WBP4	56275951	56298897	0.14723	XM_002196312.5	10	0.0241832	9	0.139612
1	NC_044998.1	MTRF1	56302157	56319631	0.187545	XM_030271974.2	11	0.152279	10	0.18303
1	NC_044998.1	NAA16	56319347	56380110	0.126541	XM_002196266.5	20	0.054912	19	0.140248
1	NC_044998.1	RGCC	56391898	56405637	0.159343	XM_030272001.2	5	0.0526321	4	0.131919
1	NC_044998.1	VWA8	56428956	56609913	0.175237	XM_030272011.2	45	0.0843665	44	0.172658
1	NC_044998.1	LOC115495081	56602400	56608029	0.112152	XR_003960192.2	2	0.0898386	1	0.134256
1	NC_044998.1	DGKH	56641310	56795316	0.181926	XM_030272026.2	31	0.0512644	30	0.163649
1	NC_044998.1	AKAP11	56810856	56854179	0.188327	XM_030272081.2	12	0.086142	11	0.194924
1	NC_044998.1	TNFSF11	56925852	56948651	0.17851	XM_030272128.2	5	0.0665169	4	0.148155
1	NC_044998.1	EPSTI1	57068073	57123711	0.206623	XM_004175066.4	12	0.0887207	11	0.187283
1	NC_044998.1	DNAJC15	57131920	57157147	0.206934	XM_012569795.3	6	0.178641	5	0.180226
1	NC_044998.1	ENOX1	57185364	57544552	0.180549	XM_030272169.2	17	0.11781	16	0.187742
1	NC_044998.1	LOC115495118	57488359	57492600	0.139446	XR_004367760.1	3	0.191518	2	0.054604
1	NC_044998.1	CCDC122	57565166	57576190	0.22244	XM_030272236.2	5	0.231978	4	0.241769
1	NC_044998.1	LACC1	57578170	57586033	0.126153	XM_002196019.4	6	0.145494	5	0.100211
1	NC_044998.1	LOC115495129	57737048	57791004	0.235295	XR_004367770.1	7	0.223013	6	0.224115
1	NC_044998.1	LOC115495125	57784213	57795517	0.214809	XR_004367768.1	3	0.240216	2	0.198587
1	NC_044998.1	TSC22D1	57803363	57893948	0.22497	XM_030272267.2	4	0.113146	3	0.183822
1	NC_044998.1	LOC116808252	57853503	57878417	0.229166	XR_004367767.1	3	0.156478	2	0.157512
1	NC_044998.1	NUFIP1	58002719	58023918	0.216844	XM_030285355.2	10	0.100395	9	0.225197
1	NC_044998.1	GPALPP1	58023934	58043962	0.252651	XM_002198683.5	8	0.189275	7	0.194841
1	NC_044998.1	LOC115495189	58051379	58055431	0.299995	XR_003960303.2	3	0.303433	2	0.207346
1	NC_044998.1	GTF2F2	58057990	58136353	0.236221	XM_030272280.2	9	0.0402686	8	0.184913
1	NC_044998.1	KCTD4	58083495	58084894	0.116808	NM_001245802.1	1	0.116808
1	NC_044998.1	LOC115497790	58142244	58142379	0.280045	XR_003963386.1	1	0.280045
1	NC_044998.1	TPT1	58143034	58148253	0.153696	NM_001245287.1	6	0.0184281	5	0.156055
1	NC_044998.1	LOC115497789	58143321	58143450	0.00169445	XR_003963385.1	1	0.00169445
1	NC_044998.1	SLC25A30	58169474	58181326	0.177174	XM_012569737.3	11	0.111145	10	0.143579
1	NC_044998.1	COG3	58182536	58211819	0.202354	XM_030272294.2	23	0.0494901	22	0.176473
1	NC_044998.1	LOC116808255	58230216	58242667	0.189869	XM_032748213.1	5	0.0941337	4	0.143292
1	NC_044998.1	LOC115495191	58242671	58244589	0.0864991	XR_004367778.1	3	0.153848	2	0.0124333
1	NC_044998.1	CBY2	58256939	58261982	0.175555	XM_030272328.2	2	0.116689	1	0.142324
1	NC_044998.1	SIAH3	58291667	58335406	0.179826	XM_012569741.3	2	0.159095	1	0.181169
1	NC_044998.1	ZC3H13	58364816	58410979	0.137879	XM_032748226.1	19	0.0700111	18	0.129219
1	NC_044998.1	CPB2	58412311	58425416	0.265424	XM_030272382.2	11	0.262694	10	0.228621
1	NC_044998.1	LCP1	58434487	58481913	0.185551	XM_030272411.2	16	0.0900116	15	0.150165
1	NC_044998.1	RUBCNL	58508608	58530812	0.200767	XM_012569728.3	16	0.178972	15	0.187409
1	NC_044998.1	LRCH1	58590458	58706375	0.210421	XR_003960356.2	21	0.0536721	20	0.214461
1	NC_044998.1	ESD	58708164	58723886	0.311467	XM_030272469.2	9	0.175555	8	0.321394
1	NC_044998.1	HTR2A	58728629	58755676	0.149872	XM_030272502.2	5	0.0885445	4	0.12654
1	NC_044998.1	LOC116808267	58843254	58851085	0.156054	XR_004367814.1	2	0.130279	1	0.177238
1	NC_044998.1	LOC115497773	58957148	58960396	0.24854	XR_003963360.2	2	0.0951557	1	0.268029
1	NC_044998.1	SUCLA2	59006328	59026712	0.145959	XM_030272539.2	11	0.0970566	10	0.169449
1	NC_044998.1	LOC115495233	59026096	59031356	0.201534	XR_003960401.2	2	0.0882633	1	0.239097
1	NC_044998.1	NUDT15	59033079	59037414	0.176345	XM_030272575.2	3	0.138712	2	0.112472
1	NC_044998.1	MED4	59038597	59046739	0.29464	XM_012569674.3	7	0.102356	6	0.295798
1	NC_044998.1	ITM2B	59076963	59104288	0.112446	XM_030272683.2	6	0.0429746	5	0.0819533
1	NC_044998.1	LOC116808273	59104390	59112005	0.139433	XR_004367837.1	2	0.173934	1	0.173809
1	NC_044998.1	RB1	59112048	59193889	0.169346	XM_030272595.2	27	0.0482902	26	0.12722
1	NC_044998.1	LPAR6	59162310	59165264	0.176918	XM_004186152.4	2	0.17672	1	0
1	NC_044998.1	RCBTB2	59195575	59227949	0.184146	XM_002195590.5	13	0.0994916	12	0.182815
1	NC_044998.1	CYSLTR2	59270996	59336422	0.183907	XR_003960421.2	3	0.176703	2	0.172926
1	NC_044998.1	FNDC3A	59367326	59479300	0.154381	XM_030272735.2	25	0.0346758	24	0.143013
1	NC_044998.1	MLNR	59479663	59486012	0.227491	XM_030272764.2	2	0.180726	1	0.190575
1	NC_044998.1	CDADC1	59494431	59509244	0.155629	XM_002198180.4	9	0.0424212	8	0.167922
1	NC_044998.1	CAB39L	59516705	59577458	0.146968	XM_030272786.2	11	0.0714747	10	0.13537
1	NC_044998.1	LOC116808937	59575956	59577872	0.103087	XM_032750922.1	2	0.0677832	1	0.0737155
1	NC_044998.1	LOC100231131	59577644	59624341	0.200478	XM_032750925.1	26	0.103561	25	0.185429
1	NC_044998.1	RCBTB1	59625113	59649904	0.265322	XM_012569796.3	12	0.106106	11	0.231689
1	NC_044998.1	ARL11	59658627	59660769	0.238206	XM_030272898.2	1	0.238206
1	NC_044998.1	KPNA3	59669837	59718833	0.276226	XM_030272910.2	17	0.0266104	16	0.22192
1	NC_044998.1	LOC115495276	59715088	59718119	0.257034	XR_003960460.2	2	0.190305	1	0.260641
1	NC_044998.1	SPRYD7	59749953	59798389	0.227132	XM_032748186.1	6	0.0457934	5	0.11345
1	NC_044998.1	LOC115495302	59760232	59761002	0.14214	XR_003960503.2	2	0.0254661	1	0.21105
1	NC_044998.1	TRIM13	59762344	59777859	0.244283	XM_002197968.5	2	0.209185	1	0.243108
1	NC_044998.1	KCNRG	59775894	59779261	0.181472	XM_030272961.2	2	0.203818	1	0.233887
1	NC_044998.1	MIR16A	59798504	59798595	0	NR_049119.1	4	0
1	NC_044998.1	MIR15A	59798666	59798736	0.00675139	NR_049080.1	4	0.00522916
1	NC_044998.1	LOC105758668	59799627	59871036	0.252666	XR_004369365.1	4	0.115397	3	0.284671
1	NC_044998.1	LOC105758667	59821129	59869489	0.226745	XR_004369361.1	11	0.0954626	10	0.196386
1	NC_044998.1	LOC116809030	59892424	59904809	0.194615	XR_004369373.1	2	0.16465	1	0.188502
1	NC_044998.1	LOC116809031	59913974	59929166	0.187067	XR_004369374.1	2	0.179762	1	0.000775795
1	NC_044998.1	LOC116808414	59972981	59978817	0.270263	XR_004367855.1	5	0.165739	4	0.349027
1	NC_044998.1	LOC115495304	59989182	60002042	0.193377	XR_003960505.2	2	0.189924	1	0.198788
1	NC_044998.1	LOC115495305	60194707	60205402	0.280316	XR_003960506.2	3	0.238257	2	0.242373
1	NC_044998.1	RNASEH2B	60250654	60293720	0.181424	XM_030273102.2	10	0.0396615	9	0.170304
1	NC_044998.1	C1H13orf42	60331656	60338816	0.249932	XM_030273109.2	3	0.228196	2	0.198307
1	NC_044998.1	FAM124A	60365161	60408690	0.197604	XM_012569669.3	4	0.175818	3	0.191831
1	NC_044998.1	LOC115495309	60413453	60422277	0.268894	XR_003960514.2	5	0.271049	4	0.150364
1	NC_044998.1	SERPINE3	60426794	60444556	0.152287	XM_032748339.1	9	0.0886514	8	0.137241
1	NC_044998.1	INTS6	60445588	60484220	0.231444	XM_012569788.3	17	0.0620847	16	0.232823
1	NC_044998.1	LOC115495315	60489735	60497158	0.25498	XR_003960525.2	2	0.219889	1	0.56522
1	NC_044998.1	LOC115495316	60497266	60500722	0.486163	XR_003960528.2	2	0.493838	1	0.46602
1	NC_044998.1	WDFY2	60502648	60560844	0.196596	XM_002197781.4	12	0.121443	11	0.206624
1	NC_044998.1	DHRS12	60566932	60598358	0.264868	XM_032748351.1	10	0.162253	9	0.222256
1	NC_044998.1	TMEM272	60603077	60629499	0.236724	XM_030273235.2	5	0.0774892	4	0.251972
1	NC_044998.1	ATP7B	60660643	60689914	0.150668	XM_030273242.2	21	0.0921344	20	0.146653
1	NC_044998.1	ALG11	60703572	60708585	0.306789	XM_012569721.3	4	0.222272	3	0.313761
1	NC_044998.1	NEK5	60709321	60734430	0.192851	XM_032748364.1	23	0.115524	22	0.2067
1	NC_044998.1	NEK3	60735747	60748632	0.228311	XM_002197613.5	16	0.155363	15	0.226711
1	NC_044998.1	CKAP2	60748773	60759107	0.126606	XM_012569826.3	8	0.116018	7	0.100553
1	NC_044998.1	VPS36	60759183	60779014	0.215164	XM_012569834.3	14	0.0370508	13	0.202403
1	NC_044998.1	THSD1	60787371	60814663	0.186858	XM_030273252.2	6	0.269552	5	0.179256
1	NC_044998.1	LOC100228216	60823389	60833741	0.139474	XM_030273476.2	9	0.0561314	8	0.129332
1	NC_044998.1	LOC100231076	60839360	60862051	0.226318	XM_030273431.2	19	0.0655612	18	0.220889
1	NC_044998.1	SLC25A15	60863758	60876557	0.317661	XM_030273483.2	8	0.147229	7	0.235611
1	NC_044998.1	MRPS31	60879441	60899284	0.16208	XM_030273505.2	7	0.0351808	6	0.178104
1	NC_044998.1	LOC101233590	60905517	60907455	0.140327	XR_003960608.2	2	0.194482	1	0.00272278
1	NC_044998.1	FOXO1	60925803	60987401	0.262625	XM_004175062.4	3	0.225966	2	0.26216
1	NC_044998.1	LOC115495405	61135000	61150628	0.177862	XR_003960613.2	4	0.101139	3	0.173942
1	NC_044998.1	COG6	61232218	61285755	0.376256	XM_030273553.2	19	0.0541905	18	0.289312
1	NC_044998.1	LHFPL6	61296315	61437566	0.269833	XM_030273569.2	4	0.176461	3	0.21127
1	NC_044998.1	LOC116808440	61391781	61398944	0.284898	XR_004367915.1	2	0.271223	1	0.00175172
1	NC_044998.1	LOC115495430	61572491	61583533	0.228762	XR_003960621.2	4	0.0864195	3	0.185031
1	NC_044998.1	NHLRC3	61600813	61610211	0.291546	XM_030273666.2	7	0.183781	6	0.236624
1	NC_044998.1	PROSER1	61610267	61632786	0.182623	XM_012569808.3	13	0.0948817	12	0.152154
1	NC_044998.1	LOC100231134	61641297	61694089	0.200427	XM_030273633.2	44	0.121115	43	0.197867
1	NC_044998.1	FREM2	61697617	61821903	0.244296	XM_002194643.3	24	0.105652	23	0.242905
1	NC_044998.1	UFM1	61929701	61941881	0.26578	XM_004175061.4	6	0.0675288	5	0.181676
1	NC_044998.1	TRPC4	62146564	62278406	0.221034	XM_002194439.5	11	0.106453	10	0.214398
1	NC_044998.1	POSTN	62301027	62332506	0.257029	XM_030273742.2	24	0.054561	23	0.241881
1	NC_044998.1	SUPT20H	62533558	62563193	0.231749	XM_030273809.2	26	0.0236628	25	0.206898
1	NC_044998.1	EXOSC8	62557189	62572689	0.15128	XM_002196582.5	11	0.0518367	10	0.131247
1	NC_044998.1	ALG5	62572770	62593046	0.235428	XM_030273993.2	10	0.0670966	9	0.189959
1	NC_044998.1	SMAD9	62612553	62656663	0.193753	XM_030274018.2	7	0.10066	6	0.186878
1	NC_044998.1	RFXAP	62655637	62667394	0.299973	XM_032750926.1	4	0.327711	3	0.327965
1	NC_044998.1	SERTM1	62707518	62721447	0.231014	XM_032748509.1	3	0.168299	2	0.244659
1	NC_044998.1	CCNA1	62801797	62808057	0.404727	XM_030274057.2	9	0.0887261	8	0.402817
1	NC_044998.1	SPART	62838920	62858325	0.219884	XM_012569799.3	9	0.0931645	8	0.200332
1	NC_044998.1	LOC115495494	62868325	62891716	0.311927	XM_030274097.2	8	0.351496	7	0.278653
1	NC_044998.1	DCLK1	62926581	63160755	0.323038	XM_012569748.3	18	0.0308303	17	0.349496
1	NC_044998.1	NBEA	63206267	63661147	0.292979	XM_030274154.2	59	0.109883	58	0.275395
1	NC_044998.1	MAB21L1	63350255	63352715	0.585638	XM_002195955.5	1	0.585638
1	NC_044998.1	RFC3	64014724	64022918	0.197847	XM_002195750.5	9	0.0303051	8	0.174995
1	NC_044998.1	STARD13	64058855	64345034	0.30393	XM_030274251.2	18	0.132685	17	0.260581
1	NC_044998.1	LOC115495505	64302016	64308579	0.194015	XR_004367971.1	3	0.0876709	2	0.244145
1	NC_044998.1	KL	64352510	64401500	0.236738	XM_002193728.4	5	0.143515	4	0.22065
1	NC_044998.1	LOC116808462	64455242	64464289	0.166654	XR_004367980.1	2	0.139387	1	0.091361
1	NC_044998.1	PDS5B	64505480	64606558	0.186541	XM_012569781.3	35	0.0683454	34	0.182755
1	NC_044998.1	N4BP2L2	64615704	64655896	0.237916	XM_030274384.2	12	0.0915417	11	0.164392
1	NC_044998.1	N4BP2L1	64656919	64668844	0.263452	XM_030285414.2	5	0.101938	4	0.319575
1	NC_044998.1	BRCA2	64668797	64703171	0.209718	XM_004175053.4	28	0.100505	27	0.200957
1	NC_044998.1	LOC116808939	64702928	64703581	0.230925	XM_032750930.1	1	0.230925
1	NC_044998.1	ZAR1L	64704938	64708629	0.147751	XM_030274515.2	4	0.0998959	3	0.0919304
1	NC_044998.1	FRY	64707855	64931765	0.197278	XM_012569764.3	63	0.0696647	62	0.19111
1	NC_044998.1	B3GLCT	65014900	65059999	0.180014	XM_030274540.2	15	0.0664922	14	0.169148
1	NC_044998.1	HSPH1	65075128	65098586	0.127053	NM_001159733.2	18	0.079082	17	0.114758
1	NC_044998.1	ALOX5AP	65160728	65168492	0.217758	XM_002194805.5	5	0.166889	4	0.136947
1	NC_044998.1	USPL1	65178005	65194512	0.212045	XM_030274558.2	9	0.125887	8	0.192001
1	NC_044998.1	LOC105758664	65194739	65227679	0.204299	XR_004367996.1	11	0.134033	10	0.212178
1	NC_044998.1	HMGB1	65237137	65245832	0.142706	XM_030274672.2	5	0.0701787	4	0.127028
1	NC_044998.1	KATNAL1	65322694	65429404	0.164635	XM_002194423.5	11	0.0683386	10	0.178492
1	NC_044998.1	UBL3	65442502	65497390	0.117887	XM_002194320.5	5	0.0415376	4	0.0915699
1	NC_044998.1	SLC7A1	65542891	65585249	0.192487	XM_030274743.2	12	0.0741592	11	0.187388
1	NC_044998.1	MTUS2	65582569	65852480	0.184578	XM_030274709.2	15	0.0965364	14	0.193177
1	NC_044998.1	SLC46A3	65884836	65897397	0.212472	XM_012569763.3	5	0.174348	4	0.166517
1	NC_044998.1	POMP	65899861	65908212	0.220038	NM_001245582.2	6	0.0917835	5	0.232768
1	NC_044998.1	FLT1	65980997	66088862	0.227035	XM_002192895.5	30	0.0787967	29	0.22261
1	NC_044998.1	PAN3	66087936	66168350	0.222068	XM_030274781.2	20	0.0462546	19	0.205858
1	NC_044998.1	FLT3	66168507	66219382	0.177105	XM_030274769.2	24	0.14679	23	0.174558
1	NC_044998.1	CDX2	66228402	66233954	0.290045	XM_030276255.2	3	0.178279	2	0.184858
1	NC_044998.1	PDX1	66249116	66255209	0.230053	XM_030274839.2	3	0.0692309	2	0.141656
1	NC_044998.1	GSX1	66292602	66294484	0.14393	XM_002192947.3	2	0.151601	1	0.0935139
1	NC_044998.1	LOC100217615	66332825	66350375	0.299304	XM_030274929.2	3	0.154886	2	0.300228
1	NC_044998.1	LNX2	66350832	66410137	0.198116	XM_032748644.1	12	0.144131	11	0.213025
1	NC_044998.1	MTIF3	66447267	66452689	0.193313	XM_012569807.3	3	0.0525533	2	0.223245
1	NC_044998.1	GTF3A	66452626	66458682	0.233974	XM_032750938.1	11	0.109364	10	0.177761
1	NC_044998.1	RASL11A	66523117	66525259	0.227401	XM_030274965.2	4	0.164061	3	0.107702
1	NC_044998.1	RPL21	66529825	66534598	0.186382	NM_001245637.2	6	0.119366	5	0.193955
1	NC_044998.1	LOC115497810	66531198	66531330	0.0991989	XR_003963398.2	1	0.0991989
1	NC_044998.1	LOC115497779	66531709	66531789	0.00093633	XR_003963365.2	1	0.00093633
1	NC_044998.1	USP12	66547003	66580084	0.261259	XM_030274977.2	9	0.0709393	8	0.191135
1	NC_044998.1	GPR12	66694133	66704958	0.187218	XM_030274997.2	2	0.116303	1	0.123345
1	NC_044998.1	WASF3	66727129	66793027	0.220279	XM_030275021.2	10	0.121673	9	0.190722
1	NC_044998.1	CDK8	66831569	66900618	0.209	XM_030275060.2	11	0.0567137	10	0.207645
1	NC_044998.1	RNF6	66907974	66916788	0.226058	XM_030275080.2	4	0.192752	3	0.172765
1	NC_044998.1	ATP8A2	66929290	67245582	0.252192	XM_030275123.2	38	0.0682839	37	0.280453
1	NC_044998.1	MIR2977	67196520	67196606	0.0388702	NR_048986.1	1	0.0388702
1	NC_044998.1	SHISA2	67252556	67257856	0.287085	XM_030275144.2	2	0.190988	1	0.272896
1	NC_044998.1	NUP58	67265534	67304898	0.238935	XM_012569812.3	16	0.0760028	15	0.213046
1	NC_044998.1	MTMR6	67306411	67332904	0.187299	XM_002191221.5	14	0.104235	13	0.158727
1	NC_044998.1	AMER2	67361995	67372444	0.254191	XM_030275190.2	1	0.254191
1	NC_044998.1	SPATA13	67516924	67590126	0.194538	XM_032748776.1	13	0.161685	12	0.204839
1	NC_044998.1	LOC100227271	67591252	67599227	0.167098	XM_002191659.3	4	0.106002	3	0.148759
1	NC_044998.1	MIPEP	67600504	67664844	0.186549	XM_002191604.5	19	0.0693015	18	0.147767
1	NC_044998.1	MIR2979-1	67659474	67659560	0.0483466	NR_048988.1	1	0.0483466
1	NC_044998.1	TNFRSF19	67679729	67735937	0.205452	XM_030275259.2	11	0.186292	10	0.188941
1	NC_044998.1	SACS	67781687	67835218	0.144347	XM_030275297.2	13	0.0811513	12	0.139802
1	NC_044998.1	SGCG	67839246	67943512	0.16558	XM_002191488.5	10	0.101493	9	0.185311
1	NC_044998.1	LOC115495654	68371813	68389274	0.208692	XR_004368081.1	4	0.227578	3	0.209596
1	NC_044998.1	FGF9	68466326	68495274	0.251927	XM_002190058.4	3	0.0524879	2	0.2752
1	NC_044998.1	LOC116808483	68506127	68519229	0.130738	XR_004368083.1	4	0.175335	3	0.134212
1	NC_044998.1	MICU2	68519253	68650857	0.225109	XM_030275367.2	12	0.0792398	11	0.219176
1	NC_044998.1	ZDHHC20	68658027	68707196	0.267726	XM_004175050.4	13	0.059309	12	0.321503
1	NC_044998.1	MRPL57	68707948	68709496	0.166706	XM_030275411.2	2	0.0461904	1	0.200342
1	NC_044998.1	SKA3	68709577	68722071	0.234408	XM_032748815.1	9	0.11672	8	0.191014
1	NC_044998.1	SAP18	68727976	68731045	0.323568	NM_001245271.1	4	0.23673	3	0.243593
1	NC_044998.1	LATS2	68757972	68806782	0.276034	XM_030275487.2	9	0.0995548	8	0.189785
1	NC_044998.1	XPO4	68830989	68910385	0.176958	XM_030275499.2	23	0.054247	22	0.151073
1	NC_044998.1	EEF1AKMT1	68914001	68923780	0.285012	XM_030275544.2	5	0.237819	4	0.344358
1	NC_044998.1	IL17D	68925211	68936811	0.216988	XM_030275536.2	3	0.134791	2	0.258494
1	NC_044998.1	LOC116808492	68936780	68942845	0.1887	XR_004368120.1	2	0.110422	1	0.21193
1	NC_044998.1	IFT88	68944330	68986910	0.185631	XR_003960999.2	26	0.0586858	25	0.15533
1	NC_044998.1	CRYL1	68992203	69042792	0.191819	XM_002188759.5	8	0.0366324	7	0.209989
1	NC_044998.1	LOC100219548	69071171	69082530	0.139273	XM_002188618.5	3	0.100838	2	0.0816618
1	NC_044998.1	GJB2	69103224	69108941	0.138616	XM_030275618.2	2	0.100712	1	0.120141
1	NC_044998.1	GJA3	69118484	69130689	0.175382	XM_030275626.2	2	0.160964	1	0.160449
1	NC_044998.1	ZMYM2	69161379	69247208	0.144985	XM_030275662.2	26	0.0627667	25	0.147191
1	NC_044998.1	PSPC1	69282829	69338810	0.14983	XM_030275773.2	7	0.0723041	6	0.157781
1	NC_044998.1	MPHOSPH8	69340405	69363950	0.168123	XM_012569652.3	13	0.182583	12	0.137047
1	NC_044998.1	CENPJ	69384465	69402879	0.186548	XM_030275845.2	17	0.115084	16	0.136773
1	NC_044998.1	RNF17	69403850	69439808	0.176968	XM_030275805.2	35	0.0936837	34	0.150704
1	NC_044998.1	LOC115495756	69442092	69447590	0.15325	XR_003961067.2	3	0.0596858	2	0.107375
1	NC_044998.1	ARHGAP20	69588033	69644304	0.279771	XM_012569650.3	16	0.061972	15	0.19538
1	NC_044998.1	LOC115495758	69653104	69660149	0.236734	XR_003961068.2	3	0.204641	2	0.272617
1	NC_044998.1	FDX1	69666207	69681800	0.213	XM_002190413.5	4	0.087355	3	0.193767
1	NC_044998.1	RDX	69701267	69747553	0.154765	XM_030275928.2	13	0.0390799	12	0.170596
1	NC_044998.1	ZC3H12C	69756019	69799486	0.145617	XM_032748892.1	6	0.0925421	5	0.0904384
1	NC_044998.1	LOC115495773	69944358	70011812	0.189753	XR_003961091.2	4	0.238821	3	0.182108
1	NC_044998.1	LOC115495774	70379728	70384525	0.123103	XR_004368165.1	3	0.12041	2	0.0723808
1	NC_044998.1	LOC115497329	70659655	70676983	0.157505	XM_030285423.2	4	0.0553536	3	0.117178
1	NC_044998.1	SLITRK5	70675443	70682717	0.143351	XM_030275981.2	2	0.204968	1	0.0805244
1	NC_044998.1	LOC115495777	71971214	72004742	0.183661	XR_003961095.2	3	0.0541718	2	0.201272
1	NC_044998.1	MIR17A	72010721	72010792	0.0017301	NR_049092.1	4	0.00135191
1	NC_044998.1	MIR18A	72010860	72010931	0.00168955	NR_049123.1	3	0.00160615
1	NC_044998.1	MIR19A	72011008	72011077	0	NR_049149.1	4	0
1	NC_044998.1	MIR20A	72011172	72011244	0	NR_049078.1	1	0
1	NC_044998.1	MIR19B-1	72011314	72011386	0	NR_049028.1	6	0
1	NC_044998.1	MIR92-1	72011431	72011502	0	NR_049108.1	6	0
1	NC_044998.1	GPC5	72032529	72619926	0.200971	XM_032748903.1	8	0.177462	7	0.178398
1	NC_044998.1	LOC115495779	72694128	72730094	0.185114	XR_004368175.1	9	0.126987	8	0.181747
1	NC_044998.1	GPC6	72733264	73455766	0.167298	XM_002196915.5	10	0.0326544	9	0.145312
1	NC_044998.1	LOC115497826	73237533	73237721	0.15925	XR_003963403.1	1	0.15925
1	NC_044998.1	DCT	73464860	73484170	0.18527	XM_002199349.4	8	0.0236642	7	0.0960576
1	NC_044998.1	TGDS	73498008	73512558	0.0887416	XM_030276091.2	13	0.0579251	12	0.0952982
1	NC_044998.1	GPR180	73512707	73540406	0.0934065	XM_002196884.5	9	0.0546059	8	0.106757
1	NC_044998.1	SOX21	73558062	73561754	0.0672627	XM_002196865.3	1	0.0672627
1	NC_044998.1	ABCC4	73701511	73840698	0.176405	XM_030276133.2	31	0.0876918	30	0.175264
1	NC_044998.1	CLDN10	73913592	73928294	0.171236	XM_002196825.5	5	0.0386658	4	0.154435
1	NC_044998.1	DZIP1	73925567	73965042	0.187251	XM_030276168.2	21	0.0633599	20	0.200665
1	NC_044998.1	DNAJC3	73970583	74000826	0.185359	XM_012569570.3	12	0.082824	11	0.144902
1	NC_044998.1	UGGT2	74000032	74079571	0.206613	XM_030276202.2	39	0.101913	38	0.191003
1	NC_044998.1	LOC116808523	74079749	74087708	0.163265	XR_004368191.1	2	0.158686	1	0.123714
1	NC_044998.1	HS6ST3	74095969	74368699	0.166776	XM_030276246.2	2	0.154105	1	0.164854
1	NC_044998.1	LOC115495795	74236298	74237943	0.176596	XR_003961132.2	2	0.306795	1	0.157032
1	NC_044998.1	LOC100226671	74405444	74406517	0.0372035	XM_002196680.3	1	0.0372035
1	NC_044998.1	LOC100229474	74424893	74426150	0.164508	LOC100229474	2	0.150211	1	0.200591
1	NC_044998.1	MBNL2	74502066	74599690	0.19753	XM_012569516.3	10	0.100979	9	0.224469
1	NC_044998.1	RAP2A	74617114	74648107	0.196753	XM_004174737.4	2	0.12291	1	0.197527
1	NC_044998.1	LOC115495798	74678517	74691363	0.177139	XR_003961134.2	4	0.123949	3	0.166635
1	NC_044998.1	LOC116809145	74702400	74703725	0.259031	XR_004369537.1	2	0.398094	1	0.144388
1	NC_044998.1	IPO5	74774598	74820177	0.168691	XM_002196581.5	26	0.0234877	25	0.14497
1	NC_044998.1	FARP1	74831327	75032305	0.186116	XM_030270562.2	27	0.126551	26	0.200769
1	NC_044998.1	STK24	75034766	75087228	0.195901	XM_002198969.5	11	0.0620209	10	0.221615
1	NC_044998.1	SLC15A1	75101646	75127946	0.185455	XM_030276337.2	23	0.136135	22	0.171072
1	NC_044998.1	DOCK9	75146604	75259080	0.23803	XM_030276348.2	56	0.0628055	55	0.236038
1	NC_044998.1	LOC116808531	75259460	75265795	0.188948	XR_004368216.1	2	0.17681	1	0.202065
1	NC_044998.1	UBAC2	75289567	75380329	0.26068	XM_030276538.2	9	0.0615304	8	0.31663
1	NC_044998.1	GPR18	75304024	75308679	0.128795	XM_004174736.4	2	0.0882119	1	0.113778
1	NC_044998.1	GPR183	75330045	75341011	0.208286	XM_004174735.4	2	0.143199	1	0.255873
1	NC_044998.1	LOC100224757	75383058	75388781	0.321693	XM_030276558.2	1	0.321693
1	NC_044998.1	MIR2984	75416106	75416199	0.00760039	NR_048992.1	1	0.00760039
1	NC_044998.1	TM9SF2	75422881	75453025	0.161188	XM_002198867.5	17	0.0803319	16	0.143223
1	NC_044998.1	CLYBL	75469735	75634162	0.213122	NM_001245137.1	9	0.101736	8	0.188023
1	NC_044998.1	LOC115495827	75587857	75661124	0.206689	XR_003961169.2	3	0.104253	2	0.17333
1	NC_044998.1	LOC115495834	75691583	75692855	0.170006	XR_003961172.2	2	0.103817	1	0.0811658
1	NC_044998.1	PCCA	75724644	75992777	0.191507	XR_004368225.1	25	0.0685042	24	0.194461
1	NC_044998.1	GGACT	75992505	76020695	0.237376	XM_030276602.2	3	0.0708154	2	0.247325
1	NC_044998.1	TMTC4	76023296	76078841	0.191812	XM_030276678.2	18	0.0868142	17	0.169691
1	NC_044998.1	LOC116808536	76124912	76126029	0.0546526	XR_004368230.1	2	0.0226519	1	0.0703483
1	NC_044998.1	NALCN	76231474	76456427	0.154788	XM_030276709.2	47	0.0336683	46	0.121295
1	NC_044998.1	ITGBL1	76465257	76587193	0.185784	XM_002196071.5	11	0.168892	10	0.168505
1	NC_044998.1	FGF14	76587526	76960692	0.158554	XM_002198665.5	5	0.0589374	4	0.157972
1	NC_044998.1	TPP2	77027951	77079493	0.131987	XM_030276757.2	30	0.040367	29	0.121147
1	NC_044998.1	METTL21C	77076737	77085849	0.167778	XM_030276782.2	9	0.0393987	8	0.11042
1	NC_044998.1	LOC115495861	77085592	77088887	0.155324	XR_003961191.2	4	0.0727611	3	0.119061
1	NC_044998.1	TEX30	77115717	77123179	0.142909	XM_030276809.2	5	0.0840376	4	0.138415
1	NC_044998.1	POGLUT2	77121853	77131000	0.142327	XM_002195935.3	10	0.0524816	9	0.127167
1	NC_044998.1	BIVM	77133912	77148454	0.0664036	XM_030272826.2	11	0.0309923	10	0.0655849
1	NC_044998.1	ERCC5	77149840	77165027	0.0938527	XM_030271824.2	16	0.0635823	15	0.096584
1	NC_044998.1	LOC100230937	77165731	77184270	0.0816419	XM_030276820.2	5	0.0535663	4	0.0826894
1	NC_044998.1	SLC10A2	77241398	77249565	0.225792	XM_002195803.2	6	0.0591463	5	0.110299
1	NC_044998.1	LOC115495840	78007638	78009794	0.0620749	XR_003961180.2	3	0.0218514	2	0.0441251
1	NC_044998.1	LOC115495868	78563349	78576422	0.317041	XR_003961197.2	3	0.358978	2	0.327079
1	NC_044998.1	LOC115495869	78646970	78694521	0.214381	XR_003961198.2	4	0.141069	3	0.0855327
1	NC_044998.1	EFNB2	78725528	78770808	0.249471	XM_002198502.5	5	0.169704	4	0.20284
1	NC_044998.1	LOC116808949	78772364	78774470	0.182384	XM_032750946.1	3	0.291958	2	0.108609
1	NC_044998.1	ARGLU1	78776795	78787200	0.236564	XM_002198482.4	4	0.0895021	3	0.210593
1	NC_044998.1	LOC115495873	78935920	78969126	0.288171	XR_003961207.2	7	0.148513	6	0.196665
1	NC_044998.1	FAM155A	79024528	79465873	0.248316	XM_030276918.2	3	0.0225182	2	0.291307
1	NC_044998.1	LOC115495882	79379674	79381523	0.119012	XR_003961211.2	2	0.144204	1	0.113642
1	NC_044998.1	LOC116809147	79496553	79499484	0.0604121	XR_004369538.1	3	0.0328396	2	0.072851
1	NC_044998.1	LIG4	79620387	79624651	0.163119	XM_002198433.4	2	0.113911	1	0.158428
1	NC_044998.1	ABHD13	79624685	79636431	0.12144	XM_032749130.1	4	0.0900902	3	0.157576
1	NC_044998.1	TNFSF13B	79644072	79656678	0.138671	XM_002198391.5	6	0.0634627	5	0.0634328
1	NC_044998.1	LOC100229427	79668438	79683170	0.205308	XM_012569583.3	11	0.209268	10	0.171921
1	NC_044998.1	LOC100232370	79693759	79713617	0.18582	XM_030277028.2	11	0.125345	10	0.152514
1	NC_044998.1	GYG2	79715392	79737169	0.226251	XM_030277048.2	9	0.187168	8	0.160882
1	NC_044998.1	XG	79738518	79759736	0.210744	XM_030277091.2	9	0.0951943	8	0.132917
1	NC_044998.1	CD99	79764251	79790362	0.176394	XM_032749165.1	11	0.0368762	10	0.149944
1	NC_044998.1	DHRSX	79844015	80043603	0.202452	XM_030277110.2	7	0.0840346	6	0.21128
1	NC_044998.1	ZBED1	79881754	79894604	0.142954	XM_030277100.2	2	0.216139	1	0.125145
1	NC_044998.1	ASMT	80231129	80244529	0.109905	XM_030277177.2	8	0.0241377	7	0.110235
1	NC_044998.1	AKAP17A	80244674	80248265	0.118502	XM_032749182.1	2	0.0893131	1	0.143779
1	NC_044998.1	P2RY8	80281308	80313973	0.167052	XM_002198203.5	3	0.0456567	2	0.167938
1	NC_044998.1	ASMTL	80325544	80351144	0.19849	XM_032749189.1	13	0.126523	12	0.203412
1	NC_044998.1	SLC25A6	80353767	80357418	0.112708	NM_001245665.1	4	0.12378	3	0.113825
1	NC_044998.1	LOC101233002	80355378	80393922	0.133899	XM_032749195.1	9	0.0342863	8	0.126687
1	NC_044998.1	LOC101232863	80378496	80401970	0.146438	XM_032749205.1	15	0.0788687	14	0.1337
1	NC_044998.1	LOC115495935	80402127	80403272	0.242797	XR_003961272.2	2	0.27905	1	0.215621
1	NC_044998.1	LOC115495938	80407827	80442816	0.125849	XM_030277303.2	11	0.0805542	10	0.110133
1	NC_044998.1	CRLF2	80458923	80474825	0.155072	XM_030277341.2	8	0.149621	7	0.168969
1	NC_044998.1	SHOX	80878983	80895824	0.154657	XM_002197967.4	5	0.0668105	4	0.132481
1	NC_044998.1	LOC115495946	81090751	81109367	0.156069	XR_003961278.1	4	0.0574282	3	0.096874
1	NC_044998.1	PPP2R3B	81109809	81162708	0.233043	XM_030277387.2	14	0.0716386	13	0.230697
1	NC_044998.1	LOC100221786	81163990	81222308	0.310372	XM_030277376.2	34	0.140313	33	0.256052
1	NC_044998.1	GTPBP6	81222324	81233629	0.304615	XM_030277412.2	10	0.0807234	9	0.189535
1	NC_044998.1	PLCXD1	81234157	81251536	0.183676	XM_030277430.2	6	0.0979634	5	0.187539
1	NC_044998.1	LOC100230413	81272233	81281573	0.205179	XM_030277445.2	6	0.147932	5	0.160741
1	NC_044998.1	RGN	81287211	81298733	0.220218	XM_030277543.2	7	0.127112	6	0.184664
1	NC_044998.1	JADE3	81305721	81369523	0.25598	XM_030277465.2	17	0.128423	16	0.245294
1	NC_044998.1	LOC115495974	81369570	81377090	0.275247	XR_003961327.2	2	0.291797	1	0.279147
1	NC_044998.1	RP2	81376696	81393363	0.320384	XM_002197733.5	5	0.196729	4	0.273046
1	NC_044998.1	SLC9A7	81409829	81478345	0.230643	XM_002194914.5	17	0.110679	16	0.210652
1	NC_044998.1	CHST7	81491341	81498708	0.203896	XM_030277611.2	1	0.203896
1	NC_044998.1	LOC115495992	81503919	81522217	0.36503	XR_003961348.2	4	0.160806	3	0.286781
1	NC_044998.1	TUBGCP5	81526859	81550518	0.368158	XM_004174748.4	23	0.12809	22	0.3106
1	NC_044998.1	CYFIP1	81556934	81631380	0.325063	XM_030277651.2	31	0.104759	30	0.331118
1	NC_044998.1	FNTM1	81607559	81612214	0.249635	XM_002197587.4	2	0.168262	1	0.233782
1	NC_044998.1	NIPA2	81633928	81646711	0.256995	XM_030277685.2	8	0.0169584	7	0.222925
1	NC_044998.1	NIPA1	81650303	81665894	0.306782	XM_012569629.3	5	0.137998	4	0.292248
1	NC_044998.1	LOC116808950	81699412	81700334	0.306077	XM_032750947.1	2	0.0324629	1	0.604233
1	NC_044998.1	HERC2	81699601	81801002	0.427843	XM_030277734.2	93	0.12501	92	0.347703
1	NC_044998.1	OCA2	81838665	81958118	0.423019	XM_032749285.1	22	0.0615542	21	0.401291
1	NC_044998.1	GABRG3	82144118	82438280	0.321923	XM_030277840.2	10	0.119733	9	0.31426
1	NC_044998.1	MIR1805	82227920	82228007	0.00227529	NR_048954.1	4	0.00113764
1	NC_044998.1	GABRA5	82444513	82490950	0.213637	XM_032749287.1	8	0.0131388	7	0.200535
1	NC_044998.1	GABRB3	82533954	82647793	0.342026	XM_030277856.2	9	0.131166	8	0.299046
1	NC_044998.1	ATP10A	82864296	82973017	0.250324	XM_030277866.2	21	0.186409	20	0.259333
1	NC_044998.1	LOC116808579	83019407	83040977	0.27678	XR_004368322.1	3	0.205268	2	0.302277
1	NC_044998.1	UBE3A	83072759	83133713	0.246676	XR_003961382.2	16	0.0714893	15	0.170375
1	NC_044998.1	CNGA3	83134661	83163947	0.263051	XM_032749315.1	9	0.129994	8	0.258647
1	NC_044998.1	VWA3B	83178594	83241975	0.299117	XM_032749316.1	28	0.124308	27	0.279087
1	NC_044998.1	TMEM131	83274918	83367649	0.39189	XM_030278007.2	41	0.0645794	40	0.399611
1	NC_044998.1	LOC115496024	83360368	83366701	0.413366	XR_003961400.2	2	0.191842	1	0.415056
1	NC_044998.1	INPP4A	83378951	83486663	0.321931	XM_030278060.2	28	0.0818293	27	0.341844
1	NC_044998.1	LOC100228523	83493228	83496832	0.406787	NM_001197303.1	3	0.194992	2	0.31903
1	NC_044998.1	UNC50	83496761	83521327	0.345043	XM_012569613.3	6	0.0680721	5	0.290427
1	NC_044998.1	MGAT4A	83501806	83578928	0.335548	XM_002196722.5	16	0.137621	15	0.347293
1	NC_044998.1	LOC115496047	83524078	83525040	0.402823	XR_003961445.2	2	0.20165	1	0.00178571
1	NC_044998.1	CRACDL	83594246	83637264	0.385008	XM_030278249.2	13	0.240035	12	0.298349
1	NC_044998.1	LOC115496053	83659442	83661329	0.443187	XR_003961454.2	3	0.35065	2	0.25229
1	NC_044998.1	TSGA10	83667930	83681029	0.343691	XM_032750950.1	18	0.138107	17	0.194599
1	NC_044998.1	LIPT1	83688017	83692687	0.268566	XM_030278337.2	2	0.138909	1	0.175198
1	NC_044998.1	MITD1	83690963	83695270	0.244724	XM_002194162.5	7	0.15026	6	0.126701
1	NC_044998.1	MRPL30	83695338	83697626	0.379726	XM_030264048.2	5	0.127203	4	0.341328
1	NC_044998.1	LYG2	83700039	83703060	0.268133	XM_032750951.1	6	0.230981	5	0.0997884
1	NC_044998.1	LOC100232375	83710281	83715602	0.312868	XM_030278371.2	5	0.248392	4	0.345531
1	NC_044998.1	TXNDC9	83723494	83733553	0.4011	XM_030278465.2	6	0.29036	5	0.390638
1	NC_044998.1	EIF5B	83733732	83770223	0.345993	XM_030278405.2	25	0.0731023	24	0.362706
1	NC_044998.1	REV1	83772387	83827648	0.318266	XM_030278425.2	23	0.102747	22	0.283565
1	NC_044998.1	LOC115496087	83828096	83831122	0.400819	XR_003961490.2	2	0.386028	1	0.378588
1	NC_044998.1	AFF3	83845848	84172251	0.278535	XM_030278486.2	21	0.108061	20	0.313157
1	NC_044998.1	LOC116808602	83907607	83918222	0.340124	XR_004368388.1	2	0.339632	1	0.147016
1	NC_044998.1	LONRF2	84230416	84264761	0.235066	XM_030278495.2	12	0.0807274	11	0.211842
1	NC_044998.1	CHST10	84285083	84303387	0.32058	XM_002196323.5	6	0.111881	5	0.350205
1	NC_044998.1	NMS	84318457	84325350	0.28433	XM_030278511.2	8	0.117656	7	0.269523
1	NC_044998.1	LOC100224770	84333076	84333759	0.240435	XM_002193952.3	1	0.240435
1	NC_044998.1	PDCL3	84337687	84345322	0.264912	XM_030278515.2	6	0.0787799	5	0.221156
1	NC_044998.1	LOC116808951	84416992	84447323	0.285035	XM_032750952.1	3	0.131599	2	0.32078
1	NC_044998.1	NPAS2	84498108	84554679	0.322718	XM_032750954.1	20	0.12308	19	0.317718
1	NC_044998.1	LOC115496118	84553307	84557606	0.30364	XM_032750962.1	3	0.154984	2	0.285175
1	NC_044998.1	RPL31	84557553	84562702	0.460959	XM_032746459.1	5	0.0199598	4	0.352606
1	NC_044998.1	TBC1D8	84563069	84611805	0.352186	XM_030278519.2	20	0.0838793	19	0.383108
1	NC_044998.1	CNOT11	84633495	84645391	0.361372	XM_012569575.3	7	0.123989	6	0.312681
1	NC_044998.1	LOC116808603	84639658	84642256	0.406404	XR_004368390.1	3	0.301261	2	0.38825
1	NC_044998.1	RNF149	84647466	84669639	0.421218	XM_030278563.2	9	0.198151	8	0.347789
1	NC_044998.1	LOC115497827	84649787	84649899	0.00176835	XR_003963406.1	1	0.00176835
1	NC_044998.1	CREG2	84672795	84692119	0.374974	XM_030278586.2	4	0.216895	3	0.397503
1	NC_044998.1	RFX8	84694037	84735009	0.338682	XM_030278608.2	16	0.0158689	15	0.268422
1	NC_044998.1	MAP4K4	84776073	84940248	0.426809	XM_030278623.2	33	0.113191	32	0.321392
1	NC_044998.1	IL1R2	84959527	84973301	0.344098	XM_030278697.2	10	0.245308	9	0.224253
1	NC_044998.1	IL1R1	85012703	85034566	0.378734	XM_030278720.2	14	0.128658	13	0.377141
1	NC_044998.1	LOC100229435	85045649	85059745	0.343233	XM_032749476.1	12	0.137963	11	0.335471
1	NC_044998.1	IL1RL1	85076329	85099006	0.293053	XM_012569546.3	12	0.148797	11	0.298042
1	NC_044998.1	IL18R1	85103435	85126042	0.217416	XM_002193332.5	11	0.100068	10	0.187764
1	NC_044998.1	IL18RAP	85129132	85149365	0.296344	XM_032749506.1	11	0.206397	10	0.219973
1	NC_044998.1	LOC100225635	85150091	85183270	0.333987	XM_030278860.2	13	0.194668	12	0.284489
1	NC_044998.1	LOC100228510	85202972	85236683	0.221513	XM_030278877.2	12	0.0200551	11	0.217229
1	NC_044998.1	MFSD9	85240835	85250083	0.202905	XM_002193220.5	8	0.142639	7	0.171476
1	NC_044998.1	TMEM182	85249859	85280240	0.270165	XM_030278898.2	5	0.102339	4	0.186546
1	NC_044998.1	LOC116808616	85294467	85314106	0.238723	XR_004368430.1	3	0.0915045	2	0.101963
1	NC_044998.1	LOC115496166	85372710	85385669	0.357181	XR_003961565.2	3	0.340591	2	0.376715
1	NC_044998.1	LOC116809148	85436904	85439163	0.0728244	XR_004369541.1	2	0.0647742	1	0.0632601
1	NC_044998.1	LOC115496168	85579298	85612698	0.375161	XR_003961568.2	3	0.196807	2	0.3799
1	NC_044998.1	LOC105758645	85715024	86099977	0.256918	XR_004369443.1	16	0.0378683	15	0.226148
1	NC_044998.1	LOC115497609	86105330	86117362	0.15625	XR_003963180.2	2	0.109134	1	0.143832
1	NC_044998.1	LOC105758648	86122469	86153296	0.185048	XR_004369429.1	5	0.207989	4	0.18416
1	NC_044998.1	LOC115497607	86152444	86157791	0.194441	XR_004369440.1	2	0.18269	1	0.145299
1	NC_044998.1	POU3F3	86165451	86168448	0.121371	XM_030286883.2	1	0.121371
1	NC_044998.1	LOC105758644	86173731	86176446	0.150713	XR_003963174.2	3	0.0808769	2	0.194078
1	NC_044998.1	LOC116809053	86181104	86227969	0.213041	XR_004369444.1	3	0.189323	2	0.213285
1	NC_044998.1	MRPS9	86248434	86281870	0.231897	XM_030278936.2	11	0.0521001	10	0.233328
1	NC_044998.1	TGFBRAP1	86306066	86342649	0.11798	XM_030278952.2	12	0.0675173	11	0.11246
1	NC_044998.1	C1H2orf49	86346509	86355190	0.181828	XM_002194319.5	4	0.187406	3	0.160183
1	NC_044998.1	FHL2	86357262	86413582	0.216643	XM_002194210.5	6	0.175806	5	0.18633
1	NC_044998.1	LOC115495867	86450415	86452094	0.208157	XR_003961204.2	3	0.130399	2	0.239867
1	NC_044998.1	NCK2	86501180	86585995	0.169432	XM_030279024.2	5	0.11717	4	0.178124
1	NC_044998.1	ECRG4	86633982	86654378	0.207607	XM_030279048.2	5	0.0748478	4	0.203238
1	NC_044998.1	UXS1	86661134	86716579	0.251874	XM_002193932.5	15	0.0665523	14	0.270935
1	NC_044998.1	LOC116808627	86799282	86882285	0.155728	XM_032749582.1	5	0.142434	4	0.153108
1	NC_044998.1	ST6GAL2	86870930	86920442	0.163534	XM_030272268.2	7	0.0619891	6	0.160815
1	NC_044998.1	LOC115496198	86976642	87043057	0.156768	XR_003961591.2	3	0.0541509	2	0.133718
1	NC_044998.1	SLC5A7	87237063	87259189	0.119075	XM_030279112.2	9	0.0604235	8	0.12155
1	NC_044998.1	LOC115496204	87312103	87340236	0.194615	XR_004368466.1	10	0.142529	9	0.174613
1	NC_044998.1	LOC115496210	87343120	87350448	0.0992088	XR_003961617.2	4	0.0990047	3	0.032124
1	NC_044998.1	SULT1C4	87350489	87357691	0.178556	XM_030279170.2	8	0.0945865	7	0.124885
1	NC_044998.1	GCC2	87364687	87394560	0.221106	XM_030279195.2	23	0.124082	22	0.189357
1	NC_044998.1	LIMS1	87401597	87468583	0.183142	XM_030279289.2	10	0.0940242	9	0.156802
1	NC_044998.1	LOC116808634	87445674	87449295	0.336144	XR_004368473.1	3	0.243008	2	0.226972
1	NC_044998.1	LOC100221862	87472039	87505559	0.129507	XM_030279202.2	30	0.0786571	29	0.0905411
1	NC_044998.1	CCDC138	87506546	87538220	0.237633	XM_030279247.2	15	0.162982	14	0.197004
1	NC_044998.1	EDAR	87544042	87617659	0.266243	XM_002193219.3	12	0.0944645	11	0.209784
1	NC_044998.1	SH3RF3	87651937	87897191	0.256019	XM_030279354.2	10	0.172385	9	0.253091
1	NC_044998.1	LOC115496239	87904728	87910314	0.181736	XR_003961678.2	3	0.156722	2	0.180204
1	NC_044998.1	SEPTIN10	87916192	87940249	0.146829	XM_030279368.2	10	0.0732019	9	0.141323
1	NC_044998.1	CHAMP1	87983138	87994860	0.210272	XM_030279384.2	2	0.0473329	1	0.275442
1	NC_044998.1	UPF3A	88002035	88028313	0.173037	XM_032749654.1	10	0.0287173	9	0.152147
1	NC_044998.1	CDC16	88029769	88052927	0.203701	XM_002192694.5	18	0.0382781	17	0.191821
1	NC_044998.1	RASA3	88055151	88226900	0.181931	XM_030279399.2	24	0.0608118	23	0.192737
1	NC_044998.1	LOC115496264	88267894	88273073	0.222259	XR_003961723.2	2	0.180972	1	0.343209
1	NC_044998.1	GAS6	88273091	88311110	0.186924	XM_030279468.2	15	0.116423	14	0.198124
1	NC_044998.1	TMEM255B	88314883	88381466	0.183387	XM_030279478.2	9	0.0436484	8	0.172902
1	NC_044998.1	ATP4B	88409704	88416932	0.160404	XM_004174722.3	7	0.0286974	6	0.13915
1	NC_044998.1	TFDP1	88434653	88462131	0.249213	NM_001245244.1	5	0.0212099	4	0.1958
1	NC_044998.1	TMCO3	88466148	88500819	0.166732	XR_003961735.2	14	0.0602929	13	0.150972
1	NC_044998.1	DCUN1D2	88500964	88523515	0.17819	XM_030279588.2	8	0.126901	7	0.170746
1	NC_044998.1	ADPRHL1	88526580	88567660	0.171485	XM_030279642.2	2	0.188356	1	0.324359
1	NC_044998.1	GRTP1	88580184	88614783	0.233167	XM_004174720.3	8	0.112159	7	0.197575
1	NC_044998.1	LAMP1	88616134	88634736	0.194396	XM_002191571.4	9	0.12036	8	0.218867
1	NC_044998.1	CUL4A	88639215	88677195	0.186098	XM_030279761.2	17	0.057983	16	0.207432
1	NC_044998.1	PCID2	88678020	88690179	0.123053	XM_030279799.2	14	0.0733079	13	0.105343
1	NC_044998.1	PROZ	88689760	88701307	0.210817	XM_030279811.2	8	0.0823049	7	0.164459
1	NC_044998.1	LOC100218905	88716115	88723564	0.204346	XM_030279816.2	7	0.0629952	6	0.161438
1	NC_044998.1	LOC100223776	88725360	88745927	0.225346	XM_002191487.4	17	0.0787176	16	0.168657
1	NC_044998.1	MCF2L	88753283	88903484	0.206745	XM_032749741.1	33	0.110033	32	0.164494
1	NC_044998.1	ATP11A	88914425	89032770	0.263418	XM_030279937.2	30	0.0807113	29	0.221974
1	NC_044998.1	LOC115496344	89051662	89071997	0.266131	XR_004368571.1	2	0.259463	1	0.250429
1	NC_044998.1	TUBGCP3	89072010	89119845	0.257306	XM_002190988.4	22	0.0420839	21	0.178394
1	NC_044998.1	LOC115496347	89121222	89128306	0.191931	XR_003961819.1	3	0.257738	2	0.187384
1	NC_044998.1	LOC115496350	89193793	89214395	0.205784	XR_003961824.1	7	0.16386	6	0.218357
1	NC_044998.1	LOC115496354	89194066	89199146	0.237602	XR_003961831.2	2	0.121243	1	0.163395
1	NC_044998.1	LOC115496359	89232922	89251321	0.158727	XR_003961837.2	2	0.102568	1	0.10332
1	NC_044998.1	SOX1	89274610	89279064	0.255198	XM_030280051.2	1	0.255198
1	NC_044998.1	LOC115496356	89281947	89284824	0.199105	XM_030280056.2	2	0.206165	1	0.231084
1	NC_044998.1	LOC115496358	89291971	89336928	0.153773	XR_003961836.2	4	0.193966	3	0.153063
1	NC_044998.1	ARHGEF7	89674961	89790750	0.142113	XM_012569600.3	21	0.0536648	20	0.126567
1	NC_044998.1	LOC115496367	89708943	89713022	0.134345	XR_003961846.2	2	0.0680161	1	0.00332594
1	NC_044998.1	LOC116808666	89791063	89792979	0.233789	XR_004368602.1	2	0.173739	1	0.294148
1	NC_044998.1	ANKRD10	89829152	89866462	0.175568	XM_030280167.2	6	0.0812189	5	0.160381
1	NC_044998.1	ING1	89904215	89911072	0.252455	XM_002189837.5	3	0.175917	2	0.112203
1	NC_044998.1	CARS2	89911466	89954121	0.18082	XM_030280268.2	15	0.0862648	14	0.174199
1	NC_044998.1	NAXD	89955096	90005877	0.373486	XM_030280187.2	12	0.195357	11	0.279943
1	NC_044998.1	RAB20	90047235	90074908	0.375176	XM_002189500.5	2	0.0875403	1	0.381213
1	NC_044998.1	COL4A2	90080114	90219935	0.405402	XM_030280323.2	48	0.0598654	47	0.289853
1	NC_044998.1	COL4A1	90220008	90339484	0.456898	XR_003961865.2	53	0.146105	52	0.420923
1	NC_044998.1	IRS2	90475885	90504558	0.386488	XM_030280354.1	2	0.453921	1	0.429301
1	NC_044998.1	LOC115496389	90715305	90718878	0.293195	XR_003961878.2	3	0.172703	2	0.413444
1	NC_044998.1	MYO16	90719048	91076761	0.352341	XM_030280377.2	35	0.140299	34	0.337731
1	NC_044998.1	MXRA5	91218659	91238095	0.257218	XM_002190020.4	7	0.198126	6	0.288562
1	NC_044998.1	PRKX	91367395	91423072	0.338225	XM_002189865.4	9	0.172247	8	0.310608
1	NC_044998.1	NLGN4X	92536750	92703064	0.220398	XM_030280444.2	9	0.149023	8	0.208783
1	NC_044998.1	MIR1397	92626852	92626935	0	NR_105659.1	4	0
1	NC_044998.1	LOC115496405	92903430	92988990	0.244211	XR_003961905.2	4	0.134707	3	0.217113
1	NC_044998.1	PUDP	93037138	93102422	0.198289	XM_030280507.2	4	0.190782	3	0.199379
1	NC_044998.1	LOC115496410	93101972	93105456	0.172988	XR_003961910.2	2	0.0761698	1	0.159868
1	NC_044998.1	STS	93113007	93212341	0.19165	XM_030285520.1	13	0.10028	12	0.130262
1	NC_044998.1	PNPLA4	93393739	93414801	0.245336	XM_030280537.2	9	0.269896	8	0.271878
1	NC_044998.1	ANOS1	93701913	93827560	0.15472	XM_030280562.1	14	0.0670635	13	0.150169
1	NC_044998.1	TBL1X	94115832	94307327	0.202757	XM_030271099.2	17	0.0622174	16	0.174246
1	NC_044998.1	LOC116808681	94262647	94269725	0.200877	XR_004368648.1	2	0.0618401	1	0.205456
1	NC_044998.1	GPR143	94319111	94332457	0.221071	XM_002187191.4	8	0.169001	7	0.205053
1	NC_044998.1	LOC115497343	94342662	94345003	0.18745	XM_030285521.2	2	0.173202	1	0.21738
1	NC_044998.1	SHROOM2	94344983	94461484	0.195333	XM_030280579.2	10	0.0834006	9	0.212622
1	NC_044998.1	CLDN34	94471413	94480717	0.146053	XM_032749892.1	3	0.0777593	2	0.117148
1	NC_044998.1	WWC3	94510413	94607446	0.175178	XM_002188716.5	23	0.0841978	22	0.188297
1	NC_044998.1	CLCN4	94606952	94652743	0.223022	XM_012569621.3	12	0.0997831	11	0.159889
1	NC_044998.1	LOC115496437	94651579	94655395	0.120584	XR_004368662.1	2	0.118696	1	0.188443
1	NC_044998.1	LOC115496446	94726337	94738406	0.132485	XR_004368663.1	2	0.133257	1	-0.00305796
1	NC_044998.1	MID1	94737049	94914682	0.186223	XM_030280704.2	11	0.109509	10	0.182999
1	NC_044998.1	LOC115495880	94992346	94993913	0.188317	XR_003961215.2	2	0.181228	1	0.192093
1	NC_044998.1	ARHGAP6	95090994	95402564	0.19457	XM_030280775.2	13	0.0370486	12	0.224558
1	NC_044998.1	LOC116808684	95201941	95207840	0.307348	XR_004368664.1	2	0.291495	1	0.166216
1	NC_044998.1	LOC100224152	95407992	95413270	0.0439678	XM_030280808.2	3	0.017783	2	0.0328778
1	NC_044998.1	LOC115496459	95431352	95434153	0.227489	XR_003961960.2	2	0.101221	1	0.232612
1	NC_044998.1	LOC115496458	95434282	95436286	0.283946	XR_003961959.2	3	0.236386	2	0.121629
1	NC_044998.1	LOC115496460	95437416	95441055	0.266494	XR_003961964.2	2	0.319715	1	0.0168338
1	NC_044998.1	MSL3	95441053	95462219	0.235839	XM_030280836.2	13	0.0544387	12	0.267677
1	NC_044998.1	LOC115496467	95583719	95590610	0.204175	XM_032749977.1	2	0.159396	1	0.353967
1	NC_044998.1	FRMPD4	95589633	95884971	0.199923	XM_030280892.2	17	0.0654938	16	0.190017
1	NC_044998.1	LOC115497834	95647524	95647643	0.154949	XR_003963416.2	1	0.154949
1	NC_044998.1	LOC115496468	95832058	95842182	0.334387	XR_004368680.1	3	0.286739	2	0.314283
1	NC_044998.1	PRPS2	95920162	95942371	0.132461	XM_030280923.2	8	0.0697273	7	0.14673
1	NC_044998.1	LOC100231797	95947331	95956884	0.128408	XM_030280921.2	2	0.0733443	1	0.11778
1	NC_044998.1	LOC115496534	95958456	95964506	0.358035	XR_004368688.1	2	0.242648	1	0.196738
1	NC_044998.1	LOC115496483	95963136	95970547	0.211345	XM_030280922.2	2	0.306803	1	0.177296
1	NC_044998.1	LOC116808695	95989449	96007079	0.154748	XR_004368689.1	3	0.119675	2	0.154415
1	NC_044998.1	TMSB4X	96024066	96025652	0.145446	NM_001245228.1	3	0.0707045	2	0.135094
1	NC_044998.1	LOC115496545	96058340	96060593	0.147953	XR_003962037.2	3	0.090213	2	0.116072
1	NC_044998.1	LOC116808696	96266231	96268520	0.185898	XR_004368690.1	2	0.216663	1	0.159753
1	NC_044998.1	LOC115496551	96268764	96279070	0.119758	XR_004368691.1	2	0.106127	1	0.223504
1	NC_044998.1	EGFL6	96321291	96351049	0.143611	XM_030280934.2	12	0.0751168	11	0.121906
1	NC_044998.1	TCEANC	96360384	96373584	0.113386	XM_002197799.5	3	0.196891	2	0.134839
1	NC_044998.1	LOC115496564	96374683	96379173	0.141634	XR_003962064.2	2	0.148572	1	0.10471
1	NC_044998.1	RAB9A	96379187	96389524	0.165192	XM_030280970.2	3	0.20116	2	0.154936
1	NC_044998.1	TRAPPC2	96392710	96397719	0.146845	NM_001245233.1	5	0.0199874	4	0.174352
1	NC_044998.1	OFD1	96397780	96429262	0.061556	XM_030280943.2	22	0.028353	21	0.0609367
1	NC_044998.1	GPM6B	96427752	96531454	0.125402	XM_004174935.4	7	0.0433635	6	0.083637
1	NC_044998.1	GEMIN8	96545864	96574205	0.197181	XM_030281103.2	5	0.128992	4	0.232665
1	NC_044998.1	GLRA2	96796937	96919051	0.143398	XM_030281163.2	10	0.045444	9	0.137482
1	NC_044998.1	LOC116808706	96890739	96896049	0.260588	XR_004368716.1	2	0.18086	1	0.283831
1	NC_044998.1	FANCB	96953302	96967422	0.151589	XM_002194464.4	9	0.0979938	8	0.152736
1	NC_044998.1	MOSPD2	96967803	97000493	0.171904	NM_001177514.1	15	0.036727	14	0.192926
1	NC_044998.1	LOC116809152	97071194	97072214	0.0671344	XM_032751881.1	2	0.0335672	1	0
1	NC_044998.1	LOC115495893	97102369	97103354	0.0393762	XM_030277002.2	2	0.039271	1	0
1	NC_044998.1	LOC100221245	97165628	97181276	0.229771	XM_032750077.1	7	0.114302	6	0.270723
1	NC_044998.1	ASB11	97192219	97205206	0.190827	XM_030281238.2	7	0.0616421	6	0.171406
1	NC_044998.1	PIGA	97208713	97217925	0.139641	XM_030281247.2	6	0.0787531	5	0.138829
1	NC_044998.1	VEGFD	97229437	97260125	0.289864	XM_002197464.5	7	0.0640836	6	0.21894
1	NC_044998.1	ACE2	97335851	97363095	0.127008	XM_002194267.4	18	0.0847655	17	0.110955
1	NC_044998.1	CLTRN	97371530	97395824	0.17985	XM_032750108.1	6	0.116869	5	0.226478
1	NC_044998.1	ZRSR2	97402656	97421552	0.10727	XM_030281295.2	11	0.0445779	10	0.103247
1	NC_044998.1	AP1S2	97421615	97452626	0.153199	XM_012569503.3	6	0.0615665	5	0.150545
1	NC_044998.1	GRPR	97566900	97596765	0.176611	XM_002197331.5	3	0.120619	2	0.154788
1	NC_044998.1	CTPS2	97749696	97807144	0.149463	XM_030281387.2	21	0.087906	20	0.160594
1	NC_044998.1	SYAP1	97807304	97828852	0.15275	XM_002194094.5	9	0.038734	8	0.149559
1	NC_044998.1	TXLNG	97831808	97856688	0.163769	XM_030281414.2	10	0.0513679	9	0.171203
1	NC_044998.1	RBBP7	97863001	97871964	0.133766	XM_030281435.2	12	0.0791045	11	0.121593
1	NC_044998.1	REPS2	97898944	97995020	0.152999	XM_030281452.2	18	0.0917461	17	0.180787
1	NC_044998.1	LOC115496626	98021356	98022630	0.107122	XR_003962122.2	3	0.0103155	2	0.0700645
1	NC_044998.1	LOC115496627	98022706	98029981	0.185367	XR_004368762.1	4	0.130036	3	0.211292
1	NC_044998.1	NHS	98066380	98312879	0.152587	XM_030281497.2	9	0.0738284	8	0.148634
1	NC_044998.1	LOC116808730	98309368	98315060	0.309154	XR_004368763.1	2	0.224609	1	0.316989
1	NC_044998.1	BEND2	98322687	98347688	0.167552	XM_032750147.1	12	0.0706241	11	0.154286
1	NC_044998.1	LOC115496636	98434711	98438300	0.163577	XR_003962159.2	2	0.107365	1	0.164214
1	NC_044998.1	RAI2	98456143	98500128	0.12033	XM_032750158.1	3	0.0862535	2	0.168498
1	NC_044998.1	SCML2	98506971	98582306	0.134319	XM_030281584.2	13	0.0734974	12	0.126837
1	NC_044998.1	LOC115496666	98551738	98557276	0.132863	XR_003962195.2	3	0.15503	2	0.114515
1	NC_044998.1	LOC115496667	98589800	98609090	0.182343	XR_003962197.2	5	0.163375	4	0.133567
1	NC_044998.1	CDKL5	98609355	98739721	0.151265	XM_030281648.2	18	0.0561861	17	0.16952
1	NC_044998.1	RS1	98744510	98757587	0.180172	XM_002196914.4	6	0.141603	5	0.17493
1	NC_044998.1	PPEF1	98766472	98801459	0.194941	XM_012569448.3	17	0.10447	16	0.189405
1	NC_044998.1	PHKA2	98802227	98848017	0.230215	XM_012569501.3	31	0.140272	30	0.225098
1	NC_044998.1	ADGRG2	98850536	98907643	0.229652	XM_030281711.2	28	0.0836189	27	0.206296
1	NC_044998.1	PDHA1	98970394	98982648	0.191043	XM_002196799.4	11	0.0968386	10	0.146423
1	NC_044998.1	MAP3K15	98982291	99064332	0.179755	XM_002193331.4	29	0.10445	28	0.191266
1	NC_044998.1	SH3KBP1	99077565	99286534	0.243837	XM_030281758.2	19	0.0479105	18	0.203042
1	NC_044998.1	BCLAF3	99287627	99321958	0.194626	XM_030281824.2	12	0.207491	11	0.134044
1	NC_044998.1	LOC115496722	99322065	99331400	0.374991	XR_003962239.2	3	0.300555	2	0.400256
1	NC_044998.1	MAP7D2	99330791	99412128	0.22997	XM_012569447.3	18	0.211318	17	0.250265
1	NC_044998.1	EIF1AX	99432819	99442039	0.196896	XM_030281935.2	7	0.188398	6	0.140679
1	NC_044998.1	RPS6KA3	99443559	99518311	0.215756	XM_002196515.5	22	0.0697158	21	0.226178
1	NC_044998.1	CNKSR2	99855930	100060009	0.17006	XM_012569489.3	21	0.0487342	20	0.161917
1	NC_044998.1	KLHL34	100060300	100064749	0.184609	XM_002192873.4	1	0.184609
1	NC_044998.1	LOC115496751	100065014	100070435	0.284866	XR_003962257.2	2	0.182342	1	0.308338
1	NC_044998.1	SMPX	100083847	100130215	0.166976	XM_030282041.2	5	0.116347	4	0.173708
1	NC_044998.1	MBTPS2	100136054	100176843	0.153782	XM_030282064.2	11	0.0520897	10	0.1854
1	NC_044998.1	LOC115496760	100196071	100198078	0.269859	XR_003962280.2	2	0.222845	1	0.443148
1	NC_044998.1	SMS	100198142	100241611	0.189312	XM_030282111.2	11	0.0639521	10	0.261005
1	NC_044998.1	PHEX	100252143	100356781	0.18706	XM_012569468.3	22	0.0474032	21	0.15612
1	NC_044998.1	LOC116808785	100300874	100312461	0.304909	XR_004368854.1	2	0.412693	1	0.243389
1	NC_044998.1	LOC116808786	100319002	100327703	0.210444	XR_004368855.1	2	0.112608	1	0.252742
1	NC_044998.1	LOC115496764	100414402	100653864	0.16303	XR_003962286.2	6	0.150981	5	0.133469
1	NC_044998.1	LOC115496770	100620021	100624502	0.0643774	XR_004368861.1	2	0.0592176	1	0.0668032
1	NC_044998.1	LOC116808789	100760971	100764097	0.106379	XR_004368862.1	2	0.184351	1	0.138031
1	NC_044998.1	PTCHD1	100772273	100813353	0.155882	XM_012569445.3	3	0.101216	2	0.157191
1	NC_044998.1	PRDX4	100887938	100894849	0.202671	XM_030282203.2	8	0.062921	7	0.176485
1	NC_044998.1	ACOT9	100898496	100923374	0.109243	XM_030282166.2	16	0.0569119	15	0.0882992
1	NC_044998.1	LOC116808791	100925195	100928248	0.160855	XR_004368877.1	2	0.12404	1	0.238077
1	NC_044998.1	SAT1	100928412	100931246	0.199098	NR_073061.1	7	0.0813213	6	0.193141
1	NC_044998.1	LOC115496797	100934612	100944255	0.206022	XR_004368917.1	2	0.134254	1	0.223843
1	NC_044998.1	APOO	100948082	100976181	0.121368	XM_030282269.2	9	0.0701391	8	0.122358
1	NC_044998.1	KLHL15	100986068	101014243	0.165245	XM_032750269.1	6	0.129392	5	0.162926
1	NC_044998.1	EIF2S3	101014528	101028764	0.141431	XM_030282261.2	12	0.0462142	11	0.127708
1	NC_044998.1	LOC115496792	101025592	101033689	0.195183	XR_003962315.2	2	0.167211	1	0.281093
1	NC_044998.1	ZFX	101043208	101066917	0.125115	XM_030282308.2	8	0.027034	7	0.0823942
1	NC_044998.1	LOC115496804	101085217	101097206	0.180282	XM_030282349.2	8	0.122507	7	0.149782
1	NC_044998.1	PDK3	101121848	101175545	0.122662	XM_002195353.5	11	0.0488893	10	0.100335
1	NC_044998.1	PCYT1B	101180563	101221615	0.172529	XM_030271756.2	9	0.106856	8	0.159557
1	NC_044998.1	LOC115496806	101212508	101214914	0.223554	XR_003962335.2	2	0.211494	1	0.168867
1	NC_044998.1	POLA1	101224627	101406031	0.159833	XM_030282381.2	37	0.0336151	36	0.186946
1	NC_044998.1	LOC115497803	101253876	101254006	0.102371	XR_003963396.1	1	0.102371
1	NC_044998.1	ARX	101409870	101417759	0.139748	XM_002195148.5	5	0.0680474	4	0.153718
1	NC_044998.1	LOC116809153	101417880	101419101	0.253176	XM_032751886.1	1	0.253176
1	NC_044998.1	LOC116808805	101784382	101803591	0.0958419	XR_004368924.1	2	0.0181285	1	0.104397
1	NC_044998.1	LOC115496809	102181420	102187246	0.122162	XR_003962337.2	2	0.0861472	1	0.112671
1	NC_044998.1	IL1RAPL1	102436480	103099252	0.192594	XM_012569500.3	11	0.0873137	10	0.189908
1	NC_044998.1	LOC115497615	102692755	102702662	0.19562	XR_003963187.2	2	0.2206	1	0.190349
1	NC_044998.1	NR0B1	103214860	103217747	0.315197	XM_002191941.4	2	0.27152	1	0.341221
1	NC_044998.1	C1HXorf21	103311933	103327909	0.197787	XM_030282439.2	2	0.1711	1	0.144544
1	NC_044998.1	GK	103346142	103402303	0.211546	XM_032750329.1	21	0.0430246	20	0.182886
1	NC_044998.1	LOC100223167	103391609	103392378	0.323749	XM_032750353.1	1	0.323749
1	NC_044998.1	TAB3	103405524	103449419	0.183479	XR_003962351.2	7	0.0697357	6	0.161085
1	NC_044998.1	LOC115496828	103449545	103454396	0.255865	XR_003962359.2	2	0.272586	1	0.353772
1	NC_044998.1	DMD	103518835	104588296	0.308316	XM_030287150.2	79	0.126947	78	0.307273
1	NC_044998.1	LOC115496834	104719503	104745032	0.527615	XR_003962366.2	4	0.664035	3	0.595954
1	NC_044998.1	LOC116808812	104799694	104849900	0.426535	XR_004368942.1	4	0.212904	3	0.424076
1	NC_044998.1	TMEM47	104978550	105001498	0.186581	XM_030282477.2	3	0.136582	2	0.186819
1	NC_044998.1	LOC115496837	105092148	105184145	0.240363	XR_003962375.2	4	0.177454	3	0.234508
1	NC_044998.1	LOC115496842	105184318	105210993	0.223099	XR_003962381.2	3	0.0642505	2	0.209467
1	NC_044998.1	CFAP47	105244356	105498298	0.242672	XM_030282490.2	64	0.136386	63	0.217558
1	NC_044998.1	PRRG1	105533767	105564785	0.308562	XM_032750363.1	4	0.336674	3	0.280154
1	NC_044998.1	LOC116808817	105577251	105582354	0.277835	XR_004368955.1	3	0.0818773	2	0.270177
1	NC_044998.1	LOC115496860	105577391	105585063	0.262305	XR_004368950.1	3	0.114355	2	0.269381
1	NC_044998.1	LANCL3	105599262	105635520	0.23466	XM_030282552.2	5	0.122713	4	0.291406
1	NC_044998.1	LOC115496863	105634551	105637016	0.202569	XR_003962404.2	2	0.20176	1	0.234263
1	NC_044998.1	XK	105637196	105654871	0.2131	XM_002191245.5	3	0.204353	2	0.194377
1	NC_044998.1	LOC100225149	105663245	105684610	0.209067	XM_002193243.5	13	0.0568848	12	0.25263
1	NC_044998.1	DYNLT3	105695245	105702658	0.184072	XM_030282577.2	5	0.0735985	4	0.149171
1	NC_044998.1	SYTL5	105715558	105794509	0.22168	XM_030282590.2	18	0.0987046	17	0.235784
1	NC_044998.1	SRPX	105797998	105838968	0.177303	XM_030282639.2	10	0.149528	9	0.168987
1	NC_044998.1	LOC115496885	105845571	105862001	0.184236	XM_030282673.2	4	0.0759777	3	0.194341
1	NC_044998.1	RPGR	105862398	105899751	0.23101	XM_030282648.2	14	0.151272	13	0.208103
1	NC_044998.1	LOC116808820	105893495	105896990	0.0853376	XR_004368958.1	2	0.0473838	1	0.0571232
1	NC_044998.1	OTC	105903019	105931824	0.180096	XM_012569509.3	10	0.194112	9	0.165003
1	NC_044998.1	TSPAN7	105976341	106063793	0.172049	XM_032750401.1	4	0.0905582	3	0.177484
1	NC_044998.1	LOC115496890	105978054	105978848	0.160455	XR_003962418.2	2	0.0922955	1	0.11691
1	NC_044998.1	LOC115496893	106003764	106007587	0.12118	XR_003962420.2	2	0.124893	1	0.085652
1	NC_044998.1	MID1IP1	106096683	106099117	0.150696	XM_030264395.2	2	0.115142	1	0.0314953
1	NC_044998.1	LOC115496894	106376791	106379994	0.135135	XR_003962422.2	2	0.108136	1	0.175772
1	NC_044998.1	BCOR	106468146	106550196	0.134556	XM_012569506.3	15	0.058155	14	0.126596
1	NC_044998.1	ATP6AP2	106667213	106678949	0.202405	XM_002190729.4	9	0.151707	8	0.15058
1	NC_044998.1	MED14	106693919	106728298	0.150713	XM_030282771.2	31	0.0447422	30	0.137878
1	NC_044998.1	LOC115496912	106766051	106769657	0.197132	XR_004368972.1	2	0.257586	1	0.00325098
1	NC_044998.1	USP9X	106781407	106881645	0.173429	XM_030282797.2	45	0.0880509	44	0.167744
1	NC_044998.1	RPL8	106885951	106889574	0.169066	NM_001245413.1	6	0.121281	5	0.156124
1	NC_044998.1	LOC115496917	106890765	106895365	0.187225	XR_003962439.2	2	0.227046	1	0.151059
1	NC_044998.1	LOC115496919	106906963	106915671	0.138825	XR_004368979.1	3	0.0792979	2	0.104568
1	NC_044998.1	DDX3X	106915624	106932751	0.227844	XM_030282819.2	17	0.112804	16	0.229172
1	NC_044998.1	NYX	106958304	106967275	0.185699	XM_030282846.2	3	0.262644	2	0.238828
1	NC_044998.1	CASK	106979483	107167124	0.189796	XM_030282946.2	28	0.0304711	27	0.181618
1	NC_044998.1	GPR34	107064576	107069667	0.183281	XM_004174928.4	2	0.2525	1	0.134472
1	NC_044998.1	GPR82	107073855	107076544	0.127768	XM_030282991.2	2	0.152216	1	0.124506
1	NC_044998.1	LOC115496938	107279301	107280945	0.430429	XR_003962460.2	2	0.389021	1	0.457348
1	NC_044998.1	LOC115496941	107287293	107289948	0.24922	XM_030283015.2	4	0.129939	3	0.257379
1	NC_044998.1	LOC115496944	107364431	107369631	0.258789	XR_003962463.2	3	0.0701751	2	0.312595
1	NC_044998.1	LOC100221249	107570007	107603803	0.217571	XM_002191244.5	15	0.135815	14	0.224251
1	NC_044998.1	LOC100223232	107612795	107662881	0.150029	XM_002190251.5	16	0.0643897	15	0.186538
1	NC_044998.1	NDP	107684163	107704527	0.168723	XM_002191101.4	4	0.0372601	3	0.130637
1	NC_044998.1	LOC115496952	107701844	107716368	0.196064	XR_003962469.2	5	0.0411788	4	0.197739
1	NC_044998.1	EFHC2	107763823	107822107	0.137699	XM_030283079.2	15	0.123344	14	0.122389
1	NC_044998.1	FUNDC1	107845640	107857652	0.183049	XM_032750485.1	5	0.167287	4	0.204393
1	NC_044998.1	LOC116808844	107857731	107862047	0.159893	XR_004369029.1	3	0.11399	2	0.170086
1	NC_044998.1	LOC115496967	107883741	107891391	0.137224	XR_004369031.1	2	0.113279	1	0.135064
1	NC_044998.1	KDM6A	107892038	108042584	0.160347	XM_032750487.1	27	0.0229106	26	0.126685
1	NC_044998.1	DIPK2B	108058297	108076190	0.134951	XM_002190250.4	5	0.122171	4	0.139536
1	NC_044998.1	LOC116808847	108076452	108084877	0.18319	XR_004369038.1	3	0.143116	2	0.0770795
1	NC_044998.1	LOC116808848	108087338	108091776	0.116175	XR_004369041.1	2	0.129247	1	0.117381
1	NC_044998.1	LOC115496969	108110504	108141433	0.113718	XR_003962508.2	4	0.105755	3	0.118598
1	NC_044998.1	LOC115496971	108113526	108114263	0.203871	XR_003962510.2	2	0.119319	1	0
1	NC_044998.1	LOC115496973	108114735	108118217	0.0826826	XR_003962512.2	2	0.0413413	1	0
1	NC_044998.1	LOC115496975	108124897	108147327	0.0879317	XR_004369044.1	2	0.0917825	1	0.0925982
1	NC_044998.1	LOC115496977	108198472	108204955	0.140533	XR_003962519.1	2	0.128584	1	0.0955924
1	NC_044998.1	LOC116808852	108215447	108268445	0.164792	XR_004369047.1	2	0.213765	1	0.156788
1	NC_044998.1	MIR221	108223935	108224007	0	NR_049019.1	1	0
1	NC_044998.1	MIR222-1	108224450	108224523	0	NR_049022.1	1	0
1	NC_044998.1	LOC115497347	108298181	108304213	0.174543	XM_032750969.1	4	0.0690326	3	0.174274
1	NC_044998.1	LOC115496981	108322978	108415064	0.143274	XR_003962526.2	6	0.132088	5	0.141202
1	NC_044998.1	ICOSLG	108471791	108488374	0.174076	XM_030283301.2	10	0.100007	9	0.12186
1	NC_044998.1	LOC115496994	108500003	108535687	0.15577	XM_030283308.2	7	0.0597777	6	0.179278
1	NC_044998.1	GATD3A	108538268	108545670	0.180435	XM_012569508.3	7	0.114712	6	0.16334
1	NC_044998.1	PWP2	108546530	108561662	0.174691	XM_002189955.5	21	0.0890274	20	0.14324
1	NC_044998.1	TRAPPC10	108563695	108601182	0.146493	XM_002189925.5	23	0.0546646	22	0.140587
1	NC_044998.1	AGPAT3	108616736	108704346	0.173397	XM_030283351.2	10	0.0827917	9	0.151243
1	NC_044998.1	LOC115497007	108704244	108710934	0.250451	XR_003962579.2	2	0.12335	1	0.262276
1	NC_044998.1	PDXK	108754560	108800084	0.214169	XM_030283379.2	11	0.111612	10	0.217791
1	NC_044998.1	RRP1B	108812848	108835268	0.242888	XM_030283393.2	16	0.146586	15	0.217597
1	NC_044998.1	HSF2BP	108836164	108866565	0.161275	XM_030283408.2	8	0.105886	7	0.163014
1	NC_044998.1	SIK1	108949195	108962361	0.183005	XM_002189395.4	13	0.144385	12	0.151564
1	NC_044998.1	LOC115497018	109070306	109074040	0.187627	XR_003962598.2	3	0.170366	2	0.237059
1	NC_044998.1	CRYAA	109149601	109153535	0.224243	XM_012569469.3	3	0.218015	2	0.236773
1	NC_044998.1	U2AF1	109175445	109192065	0.237661	XM_030262892.2	8	0.137485	7	0.244224
1	NC_044998.1	LOC100222166	109200188	109225543	0.248594	XM_030283454.2	17	0.0769074	16	0.235524
1	NC_044998.1	LOC116808955	109238147	109241539	0.384774	XM_032750974.1	4	0.26443	3	0.22056
1	NC_044998.1	LOC100225076	109242355	109255378	0.259064	XM_030283472.2	11	0.0813028	10	0.254847
1	NC_044998.1	PKNOX1	109269091	109309153	0.241941	XM_030283487.2	12	0.0978083	11	0.234674
1	NC_044998.1	NDUFV3	109326030	109334334	0.160728	XM_030283565.2	5	0.0840353	4	0.129294
1	NC_044998.1	WDR4	109334357	109354702	0.198567	XM_030283539.2	11	0.0909253	10	0.166612
1	NC_044998.1	PDE9A	109371652	109424919	0.202762	XM_030283594.2	14	0.141268	13	0.225436
1	NC_044998.1	SLC37A1	109437012	109472495	0.254434	XM_032750610.1	21	0.117627	20	0.238628
1	NC_044998.1	RSPH1	109482953	109490034	0.199186	XM_030283612.2	9	0.145875	8	0.200479
1	NC_044998.1	UBASH3A	109498145	109521865	0.201695	XM_030283626.2	14	0.0978341	13	0.214936
1	NC_044998.1	TMPRSS3	109503832	109543664	0.191822	XM_030283649.2	13	0.0370464	12	0.189878
1	NC_044998.1	LOC105758631	109565823	109569298	0.192189	XM_030283660.2	4	0.0429776	3	0.213779
1	NC_044998.1	ABCG1	109576821	109633053	0.163024	XM_030283682.2	15	0.157473	14	0.148105
1	NC_044998.1	LOC115497349	109652241	109664394	0.10656	XM_032750649.1	7	0.0691239	6	0.115545
1	NC_044998.1	UMODL1	109687179	109732945	0.105206	XM_032750979.1	21	0.084175	20	0.0920096
1	NC_044998.1	ZBTB21	109761634	109781183	0.135434	XM_030283700.2	2	0.115044	1	0.148641
1	NC_044998.1	LOC115497050	109780661	109790609	0.131587	XR_004369087.1	3	0.115295	2	0.150829
1	NC_044998.1	C2CD2	109790357	109824636	0.167032	XM_002187274.4	14	0.102557	13	0.163065
1	NC_044998.1	PRDM15	109834383	109869386	0.144618	XM_030283740.2	25	0.0552579	24	0.125093
1	NC_044998.1	RIPK4	109896428	109919655	0.161732	XM_030283796.2	8	0.135102	7	0.167346
1	NC_044998.1	TMPRSS2	109991426	110006232	0.160178	XM_030283809.2	14	0.0809491	13	0.153977
1	NC_044998.1	LOC100218402	110007963	110025945	0.154723	XM_030283834.2	14	0.0865776	13	0.15407
1	NC_044998.1	FAM3B	110042814	110055827	0.127697	XM_030283847.2	7	0.066574	6	0.172323
1	NC_044998.1	BACE2	110061648	110119987	0.158928	XM_030283865.2	9	0.149121	8	0.184076
1	NC_044998.1	LOC116808876	110162659	110169212	0.305427	XR_004369098.1	3	0.240849	2	0.42617
1	NC_044998.1	DSCAM	110276174	110743685	0.168642	XM_030283877.2	33	0.0769831	32	0.192942
1	NC_044998.1	LOC116809070	110353039	110372785	0.135451	XR_004369461.1	2	0.128175	1	0.115674
1	NC_044998.1	LOC116809069	110536113	110557915	0.187538	XR_004369459.1	2	0.127133	1	0.19485
1	NC_044998.1	LOC116809065	110551831	110552932	0.114051	XM_032751603.1	2	0.0570255	1	0
1	NC_044998.1	LOC115497069	110638838	110641638	0.0409787	XM_032751592.1	2	0.0204893	1	0
1	NC_044998.1	PCP4	110781720	110830197	0.231448	NM_001197258.2	3	0.263972	2	0.226622
1	NC_044998.1	IGSF5	110849451	110878942	0.177497	XM_030283941.2	9	0.124147	8	0.162133
1	NC_044998.1	B3GALT5	110890649	110906515	0.229846	XM_030283952.2	4	0.152687	3	0.198488
1	NC_044998.1	SH3BGR	110930104	110956617	0.157791	XM_032750693.1	7	0.0710919	6	0.168503
1	NC_044998.1	LCA5L	110960370	110975204	0.128229	XM_032750690.1	9	0.0877602	8	0.117192
1	NC_044998.1	GET1	110974709	110980242	0.142585	XM_002189504.5	5	0.0772561	4	0.132262
1	NC_044998.1	HMGN1	110980501	110985151	0.15976	XM_030261274.2	6	0.0304347	5	0.0955093
1	NC_044998.1	LOC115497109	110982920	110986484	0.257825	XR_003962689.2	2	0.236571	1	0.124508
1	NC_044998.1	BRWD1	110988245	111030376	0.206913	XM_030284074.2	41	0.102136	40	0.162708
1	NC_044998.1	LOC115497101	111034220	111037002	0.00554536	XM_030284016.2	2	0.00277268	1	0
1	NC_044998.1	LOC115497100	111041508	111044514	-0.00414552	XM_030284003.2	3	-0.00138184	2	0
1	NC_044998.1	PSMG1	111051912	111061139	0.201991	XM_030284104.2	7	0.0740243	6	0.168882
1	NC_044998.1	LOC115497117	111105140	111118690	0.191048	XR_004369128.1	3	0.270242	2	0.181846
1	NC_044998.1	ETS2	111192525	111206964	0.1553	XM_030284121.2	10	0.0275864	9	0.209992
1	NC_044998.1	LOC115497111	111265908	111269243	0.10431	XM_032750714.1	3	0.0347699	2	0
1	NC_044998.1	LOC116808885	111273811	111276275	0.167542	XR_004369131.1	2	0.17411	1	0.161397
1	NC_044998.1	LOC115497127	111276495	111291614	0.232283	XR_004369132.1	3	0.0495549	2	0.256954
1	NC_044998.1	ERG	111291933	111434138	0.183265	XM_030284132.2	11	0.0283242	10	0.201739
1	NC_044998.1	KCNJ15	111470926	111495476	0.178068	XM_030284173.2	2	0.118889	1	0.118654
1	NC_044998.1	KCNJ6	111637906	111804033	0.189554	XM_012570140.3	4	0.0702157	3	0.189211
1	NC_044998.1	DYRK1A	111822143	111898725	0.176842	XM_030284222.2	12	0.0975991	11	0.204487
1	NC_044998.1	VPS26C	111915896	111933792	0.151922	XM_002188292.5	8	0.0936065	7	0.133233
1	NC_044998.1	TTC3	111930932	111990038	0.15489	XM_030284307.2	47	0.0474871	46	0.1499
1	NC_044998.1	LOC115497168	111938423	111953249	0.159736	XR_003962739.2	2	0.142424	1	0.15733
1	NC_044998.1	LOC116808896	111946322	111948937	0.102292	XR_004369156.1	2	0.0776144	1	0.0429363
1	NC_044998.1	LOC116808897	111965058	111970871	0.141114	XR_004369157.1	2	0.137472	1	0.136777
1	NC_044998.1	PIGP	111990129	111992833	0.156842	XM_032750787.1	4	0.0646104	3	0.191969
1	NC_044998.1	LOC116808895	111998659	112000456	0.191598	XR_004369155.1	2	0.12385	1	0.020779
1	NC_044998.1	LOC115497172	112003274	112008798	0.178245	XR_003962744.2	4	0.211448	3	0.130758
1	NC_044998.1	HLCS	112008810	112134536	0.141095	XM_030284339.2	11	0.0971398	10	0.14335
1	NC_044998.1	SIM2	112128163	112184931	0.135891	XM_030284346.2	11	0.143449	10	0.136315
1	NC_044998.1	CLDN14	112262595	112291125	0.221196	XM_032750790.1	3	0.246727	2	0.236162
1	NC_044998.1	CHAF1B	112302967	112316606	0.226765	XM_030284361.2	14	0.182056	13	0.192303
1	NC_044998.1	MORC3	112317798	112340621	0.222206	XM_002187785.5	17	0.0821988	16	0.17474
1	NC_044998.1	DOP1B	112345259	112393416	0.17459	XM_032750797.1	37	0.0991594	36	0.193374
1	NC_044998.1	LOC100222525	112398217	112404638	0.246119	XM_030284464.2	4	0.246698	3	0.21567
1	NC_044998.1	SETD4	112404637	112418007	0.204925	XM_002188590.5	11	0.133733	10	0.158015
1	NC_044998.1	RUNX1	112769274	112955865	0.281573	XM_030284489.2	8	0.0987458	7	0.284509
1	NC_044998.1	LOC115497203	112860039	112862120	0.340301	XR_003962770.2	2	0.321968	1	0.321664
1	NC_044998.1	LOC116808898	112930396	112933063	0.297815	XR_004369161.1	2	0.316183	1	0.121955
1	NC_044998.1	CLIC6	112981806	113009457	0.187777	XM_030284520.2	7	0.343784	6	0.21702
1	NC_044998.1	RCAN1	113022184	113062180	0.158409	XM_030287972.2	4	0.144605	3	0.0813701
1	NC_044998.1	LOC100227551	113089579	113090191	0.314039	XM_002190228.3	1	0.314039
1	NC_044998.1	LOC100224669	113090655	113090980	0.269579	XM_002190266.4	1	0.269579
1	NC_044998.1	LOC115497743	113115575	113118929	0.133102	XR_004369187.1	2	0.160768	1	0.0345788
1	NC_044998.1	SMIM11A	113120636	113140077	0.131667	XR_004369174.1	7	0.0704662	6	0.142821
1	NC_044998.1	KCNE2	113141148	113143734	0.108416	XM_030288026.2	2	0.21879	1	0.0687732
1	NC_044998.1	LOC115497741	113197412	113201864	0.0869723	XR_004369191.1	3	0.0275087	2	0.0814222
1	NC_044998.1	MRPS6	113251845	113296233	0.230988	NM_001245109.1	3	0.239988	2	0.232068
1	NC_044998.1	LOC116808912	113295309	113303801	0.120774	XR_004369192.1	2	0.187159	1	0.115243
1	NC_044998.1	ATP5PO	113366818	113370598	0.146867	XM_032746814.1	6	0.0117059	5	0.216079
1	NC_044998.1	LOC100222702	113399867	113427321	0.147601	XM_032750865.1	21	0.0635969	20	0.0863128
1	NC_044998.1	GART	113429159	113467536	0.202039	XM_030287421.2	25	0.102965	24	0.174988
1	NC_044998.1	SON	113469453	113506682	0.212969	XR_003963207.2	13	0.0837582	12	0.175451
1	NC_044998.1	DONSON	113507432	113515909	0.13646	XM_030287564.2	10	0.104235	9	0.126974
1	NC_044998.1	CRYZL1	113516001	113531816	0.218	XM_032751744.1	15	0.123994	14	0.210024
1	NC_044998.1	ITSN1	113531767	113638359	0.187884	XM_030287331.2	39	0.101086	38	0.169734
1	NC_044998.1	DNAJC28	113651363	113654600	0.215783	XM_032751722.1	3	0.150468	2	0.158423
1	NC_044998.1	TMEM50B	113657774	113668459	0.169936	NM_001245717.1	7	0.169949	6	0.175758
1	NC_044998.1	IFNGR2	113669616	113691238	0.179792	XM_030287912.2	7	0.136573	6	0.193586
1	NC_044998.1	LOC116809114	113673982	113674822	0.221226	XR_004369508.1	2	0.152409	1	0.724571
1	NC_044998.1	IFNAR1	113696607	113715676	0.144881	XM_032751696.1	11	0.0796811	10	0.176384
1	NC_044998.1	IL10RB	113724196	113734828	0.220505	XM_030287901.2	7	0.0748753	6	0.223501
1	NC_044998.1	IFNAR2	113735900	113748040	0.16562	XM_030287629.2	9	0.0893545	8	0.148391
1	NC_044998.1	LOC101233749	113821144	113822889	0.0626058	XM_030284558.2	2	0.0530583	1	0.0608128
1	NC_044998.1	RRM1	113884850	113902782	0.189948	XM_030287517.2	19	0.114477	18	0.18222
1	NC_044998.1	STIM1	113904617	113978276	0.187879	XM_030284583.2	14	0.062397	13	0.159091
1	NC_044998.1	RHOG	113980907	113987272	0.122181	XM_030284664.2	2	0.0875542	1	0.120622
1	NC_044998.1	PGAP2	113989475	114005301	0.239295	XM_030284712.2	6	0.146757	5	0.23567
1	NC_044998.1	NUP98	114005981	114040359	0.2336	XM_032751637.1	33	0.151553	32	0.222326
1	NC_044998.1	CHRNA10	114041397	114043941	0.318635	XM_030284731.2	5	0.157686	4	0.239653
1	NC_044998.1	LOC115497223	114044288	114045841	0.266793	XM_030284745.2	2	0.286383	1	-0.0214756
1	NC_044998.1	LOC100223643	114077605	114079174	0.164834	XM_030284805.2	1	0.164834
1	NC_044998.1	LOC115497224	114079192	114085449	0.158242	XM_030284755.2	2	0.173293	1	0.129674
1	NC_044998.1	LOC115497241	114091890	114095183	0.112079	XR_004369506.1	2	0.162868	1	0.0403995
1	NC_044998.1	LOC100220722	114096643	114109536	0.0839988	XM_032751779.1	5	0.0187385	4	0.0330463
1	NC_044998.1	LOC100190585	114099479	114100991	0.107011	NM_001245467.1	3	0.0554221	2	0.0627537
1	NC_044998.1	HBE1	114103229	114104635	0.0951532	NM_001245112.2	3	0.12065	2	0.0504864
1	NC_044998.1	LOC100222646	114107190	114116169	0.113585	XM_030284775.2	4	0.0521131	3	0.0711987
1	NC_044998.1	LOC100227500	114127292	114132172	0.158248	XM_030284827.2	5	0.208035	4	0.116237
1	NC_044998.1	LOC115490576	114145323	114148224	0.126318	LOC115490576	1	0.126318
1	NC_044998.1	LOC115497281	114158562	114164668	0.183908	XM_030285079.2	1	0.183908
1	NC_044998.1	RPS11	114171221	114173388	0.118353	XM_032746978.1	5	0.0716904	4	0.179838
1	NC_044998.1	LOC115497780	114171493	114171578	0.00222469	XR_003963367.1	1	0.00222469
1	NC_044998.1	LOC115497787	114171999	114172082	0.243716	XR_003963383.1	1	0.243716
1	NC_044998.1	FAM160A2	114175465	114184056	0.20983	XM_032751660.1	14	0.122754	13	0.154818
1	NC_044998.1	CNGA4	114183495	114189310	0.115286	XM_032750985.1	6	0.179602	5	0.0779978
1	NC_044998.1	CCKBR	114189418	114192870	0.149448	XM_030285067.2	5	0.102142	4	0.173847
1	NC_044998.1	SMPD1	114193377	114197317	0.167432	XM_030285000.2	6	0.165326	5	0.0812753
1	NC_044998.1	APBB1	114197687	114204539	0.134488	XM_030284977.2	14	0.105028	13	0.167501
1	NC_044998.1	TRIM3	114207435	114216016	0.16901	XM_030284929.2	12	0.109659	11	0.138371
1	NC_044998.1	ARFIP2	114218234	114223790	0.314506	XM_030285114.2	8	0.234524	7	0.167504
1	NC_044998.1	TIMM10B	114223837	114224729	0.305284	NM_001245163.1	3	0.395101	2	0.113864
1	NC_044998.1	LOC100228958	114225099	114232281	0.330308	XM_030284950.2	13	0.141074	12	0.211205
1	NC_044998.1	RRP8	114232314	114234861	0.30171	XM_030285088.2	7	0.189055	6	0.140832
1	NC_044998.1	ILK	114234748	114241277	0.155364	XM_030285030.2	13	0.0563689	12	0.110478
1	NC_044998.1	TAF10	114241768	114243498	0.101902	NM_001245438.2	5	0.0758969	4	0.127443
1	NC_044998.1	TPP1	114243728	114249310	0.176976	XM_030285008.2	13	0.141453	12	0.203338
1	NC_044998.1	DCHS1	114251879	114295467	0.127178	XM_030284897.2	21	0.0689707	20	0.11447
1	NC_044998.1	LCMT2	114315827	114335821	0.119029	XM_012569407.3	13	0.0673115	12	0.123688
1	NC_044998.1	LOC115497292	114336280	114337958	0.139526	XM_030285152.2	2	0.0850611	1	0.0185322
1A	NC_044999.1	LOC100225533	17555	31927	0.297567	XR_003957822.2	6	0.15515	5	0.219024
1A	NC_044999.1	LOC115492608	26072	27983	0.123366	XM_032752320.1	3	0.0415112	2	0.0128076
1A	NC_044999.1	GOLGB1	31967	68432	0.298733	XM_030261644.2	23	0.116439	22	0.255161
1A	NC_044999.1	LOC100223649	70234	87552	0.126983	XM_030261669.2	15	0.0884107	14	0.0893491
1A	NC_044999.1	LOC100220727	89177	91230	0.110065	XM_030261675.2	1	0.110065
1A	NC_044999.1	NME6	102033	104625	0.464448	XM_032752361.1	6	0.0894661	5	0.275375
1A	NC_044999.1	RABL2A	105290	109586	0.346254	NM_001245595.2	8	0.0634553	7	0.262229
1A	NC_044999.1	LOC100230310	106946	119149	0.308072	XM_032752382.1	4	0.257434	3	0.406971
1A	NC_044999.1	ATP6V1F	119259	120932	0.571855	XM_030261567.2	2	0.358577	1	0.0745293
1A	NC_044999.1	FLNC	122286	150946	0.107431	XM_032752395.1	47	0.083411	46	0.0775439
1A	NC_044999.1	OPN1SW	155285	158383	0.18234	NM_001076704.1	5	0.171103	4	0.116289
1A	NC_044999.1	CALU	159239	173425	0.159498	XM_030261678.2	7	0.120622	6	0.123047
1A	NC_044999.1	LOC116809235	162118	167024	0.298203	XR_004369690.1	3	0.163958	2	0.204476
1A	NC_044999.1	IRF5	183741	188684	0.179345	XM_030261672.2	9	0.153985	8	0.131786
1A	NC_044999.1	TNPO3	188524	210115	0.219174	XM_030261660.2	23	0.146668	22	0.214332
1A	NC_044999.1	LEP	259819	262268	0.16926	XM_030261568.2	4	0.0868321	3	0.13334
1A	NC_044999.1	SND1	270125	341539	0.168632	XM_032752200.1	23	0.0947812	22	0.141499
1A	NC_044999.1	LRRC4	278730	282361	0.0833542	XM_030261663.2	1	0.0833542
1A	NC_044999.1	LOC115492572	358119	362629	0.141839	XM_032752437.1	6	0.082761	5	0.0728282
1A	NC_044999.1	LOC116809243	400529	417232	0.153712	XM_032752466.1	3	0.0719538	2	0.104849
1A	NC_044999.1	LOC115492562	419676	522931	0.112363	XM_032752460.1	18	0.0689675	17	0.103789
1A	NC_044999.1	MAPK8IP2	533511	560089	0.105344	XM_030261603.2	12	0.100465	11	0.0748939
1A	NC_044999.1	LOC115492594	563681	568068	0.116035	XM_030261630.2	4	0.128758	3	0.0699525
1A	NC_044999.1	CHKB	567922	580445	0.0620661	XM_032752206.1	9	0.0484003	8	0.0470799
1A	NC_044999.1	CPT1B	582855	599323	0.0596735	XM_032752479.1	19	0.0350168	18	0.0416774
1A	NC_044999.1	LOC116807755	602044	604859	-0.00408195	XM_032746505.1	5	0.00759928	4	0.0294384
1A	NC_044999.1	ODF3B	605869	609237	0.422922	XM_030261631.2	5	0.0261769	4	0.126657
1A	NC_044999.1	TYMP	609774	617730	0.0772152	XM_032752497.1	9	0.0697495	8	0.0427421
1A	NC_044999.1	LOC115492592	618359	620235	0.137115	XM_032752496.1	2	0.0906849	1	0.0180304
1A	NC_044999.1	NCAPH2	621401	633582	0.106144	XR_004369707.1	10	0.142155	9	0.0730574
1A	NC_044999.1	LMF2	633596	645531	0.0926113	XM_030261610.2	14	0.0938053	13	0.0914184
1A	NC_044999.1	LOC116809245	645297	645946	0.101177	XR_004369710.1	3	0.0337258	2	0
1A	NC_044999.1	MIOX	646047	649131	0.169158	XM_030261611.2	10	0.0756082	9	0.0911674
1A	NC_044999.1	ADM2	650053	653823	0.104805	XM_030261612.2	2	0.0772833	1	0.0990999
1A	NC_044999.1	SBF1	657740	717902	0.127272	XM_032752213.1	40	0.115069	39	0.124309
1A	NC_044999.1	PPP6R2	728317	784882	0.158487	XM_030261575.2	25	0.13013	24	0.144864
1A	NC_044999.1	DENND6B	790771	808564	0.185861	XM_030261594.2	20	0.0959012	19	0.181001
1A	NC_044999.1	LOC115492573	811762	815097	0.204823	XM_032752214.1	9	0.156528	8	0.12703
1A	NC_044999.1	GCC1	816126	821071	0.155285	XM_030261620.2	3	0.138901	2	0.186193
1A	NC_044999.1	LOC115492597	822213	827022	0.121775	XM_030261636.2	5	0.118426	4	0.0337321
1A	NC_044999.1	ARSA	827586	841615	0.151235	XM_032752522.1	8	0.175365	7	0.033031
1A	NC_044999.1	LOC115492576	841713	844801	0.254188	XM_032752535.1	7	0.0737005	6	0.126562
1A	NC_044999.1	LOC116809214	844928	851011	0.270604	XM_032752216.1	5	0.157774	4	0.211541
1A	NC_044999.1	TSPAN33	851723	858670	0.20475	XM_032752554.1	8	0.269459	7	0.187069
1A	NC_044999.1	SMO	861573	871445	0.185141	XM_030261618.2	12	0.119595	11	0.188776
1A	NC_044999.1	AHCYL2	875893	940512	0.246455	XM_030261572.2	17	0.071103	16	0.234867
1A	NC_044999.1	STRIP2	941417	961002	0.248368	XM_032752567.1	21	0.110628	20	0.243812
1A	NC_044999.1	LOC116809252	961456	963464	0.112984	XR_004369720.1	2	0.0840694	1	0.15491
1A	NC_044999.1	SMKR1	963559	973972	0.201134	XR_004369721.1	6	0.119818	5	0.19641
1A	NC_044999.1	LOC116809256	969458	976577	0.222622	XR_004369724.1	3	0.110006	2	0.137114
1A	NC_044999.1	NRF1	977402	1039393	0.241223	XM_032752576.1	12	0.194167	11	0.294619
1A	NC_044999.1	MIR183	1042568	1042643	0.00550778	NR_105655.1	3	0.00367185
1A	NC_044999.1	LOC116809217	1045344	1046471	0.247448	XM_032752220.1	1	0.247448
1A	NC_044999.1	UBE2H	1053072	1098256	0.21948	XM_032752633.1	7	0.0386498	6	0.207234
1A	NC_044999.1	LOC116809260	1061604	1066014	0.157898	XR_004369730.1	2	0.164274	1	0.0256588
1A	NC_044999.1	LOC116809259	1086187	1096599	0.214101	XR_004369729.1	2	0.100329	1	0.180288
1A	NC_044999.1	KLHDC10	1113689	1131552	0.162943	XM_030289588.2	11	0.0859001	10	0.134777
1A	NC_044999.1	LOC105758620	1133740	1139255	0.2031	XM_030289555.2	19	0.121629	18	0.159765
1A	NC_044999.1	TMEM209	1141387	1150365	0.21069	XM_030289599.2	15	0.156257	14	0.216085
1A	NC_044999.1	LOC100223967	1153991	1162051	0.198977	XM_002187371.3	12	0.0915977	11	0.149825
1A	NC_044999.1	LOC100221042	1164843	1170247	0.222031	XM_002187404.3	11	0.0714017	10	0.174327
1A	NC_044999.1	LOC100224866	1170928	1174684	0.166867	XM_002187557.4	11	0.146067	10	0.108201
1A	NC_044999.1	CEP41	1175302	1189435	0.26106	XM_012568797.3	11	0.113502	10	0.270454
1A	NC_044999.1	MEST	1186707	1195919	0.224851	XM_030289768.2	12	0.0953526	11	0.221859
1A	NC_044999.1	COPG2	1195820	1231798	0.179869	XM_032752654.1	24	0.0543241	23	0.196687
1A	NC_044999.1	IL15RA	1230905	1239152	0.188985	XM_032752229.1	7	0.178952	6	0.136719
1A	NC_044999.1	FBH1	1232677	1268223	0.123367	XM_032752653.1	24	0.0754041	23	0.13429
1A	NC_044999.1	ANKRD16	1268320	1286110	0.12847	XM_032752673.1	7	0.100069	6	0.161225
1A	NC_044999.1	GDI2	1287747	1301689	0.137527	XM_030289672.2	11	0.105472	10	0.111106
1A	NC_044999.1	TASOR2	1303212	1351464	0.0945811	XM_032752679.1	24	0.0652597	23	0.0722626
1A	NC_044999.1	ASB13	1360938	1374829	0.147813	XM_030289793.2	6	0.0564882	5	0.138786
1A	NC_044999.1	LOC100231595	1382504	1387610	0.148106	XM_030289841.2	3	0.116115	2	0.0690919
1A	NC_044999.1	LOC116809222	1387627	1388744	0.0874929	XM_032752235.1	2	0.0865781	1	0.0177948
1A	NC_044999.1	NET1	1387678	1442576	0.180857	XM_030289821.2	12	0.066452	11	0.197663
1A	NC_044999.1	TUBAL3	1451064	1459864	0.160568	XM_032752715.1	4	0.0612971	3	0.195451
1A	NC_044999.1	UCN3	1468908	1474912	0.0493489	XM_032752738.1	2	0.0282043	1	0.04527
1A	NC_044999.1	LOC105758623	1483378	1591237	0.125107	XM_032752720.1	86	0.0915546	85	0.126888
1A	NC_044999.1	MIR205	1528959	1529039	0.0811186	NR_049154.1	1	0.0811186
1A	NC_044999.1	SLC35B4	1592920	1609356	0.122834	XM_030289891.2	10	0.0925568	9	0.126328
1A	NC_044999.1	LRGUK	1610838	1660473	0.169088	XM_032752726.1	20	0.0736246	19	0.163867
1A	NC_044999.1	EXOC4	1665324	1983973	0.190831	XM_032752751.1	18	0.184143	17	0.176376
1A	NC_044999.1	CHCHD3	2038577	2167911	0.154876	XM_032752005.1	9	0.0441599	8	0.172063
1A	NC_044999.1	PLXNA4	2266401	2738982	0.131038	XM_030289996.2	32	0.0909832	31	0.133073
1A	NC_044999.1	PODXL	3044837	3092281	0.238523	XM_030290039.2	9	0.218699	8	0.223706
1A	NC_044999.1	MKLN1	3093168	3194606	0.176238	XM_004176519.4	18	0.0765494	17	0.189418
1A	NC_044999.1	LOC116809281	3235923	3248045	0.121979	XR_004369756.1	3	0.0470623	2	0.124285
1A	NC_044999.1	LOC116809279	3363065	3384086	0.185201	XR_004369753.1	2	0.157494	1	0.19464
1A	NC_044999.1	MIR29B-1	3379038	3379108	0.00428816	MIR29B	3	0.00369081
1A	NC_044999.1	MIR29A-1	3380072	3380142	0	NR_049054.1	3	0
1A	NC_044999.1	LOC100225832	3411510	3413691	0.214272	XM_012568821.3	3	0.407385	2	0.0670888
1A	NC_044999.1	LOC100222960	3415696	3420981	0.0819829	XM_030290141.2	4	0.0958764	3	0.0398574
1A	NC_044999.1	LOC100228705	3415776	3430679	0.130059	XM_030290092.2	3	0.083509	2	0.065079
1A	NC_044999.1	LOC100225830	3415783	3441285	0.133379	XM_002189075.5	3	0.012534	2	0.124506
1A	NC_044999.1	LOC116806621	3446182	3451933	0.174037	XM_030290131.2	3	0.0580124	2	0
1A	NC_044999.1	LOC100222957	3456906	3472396	0.132815	XM_030290169.2	7	0.10608	6	0.110694
1A	NC_044999.1	RBM17	3490073	3502845	0.17847	XM_002189470.5	12	0.0701743	11	0.179096
1A	NC_044999.1	LOC115498235	3508897	3514157	0.164346	XR_003963654.2	3	0.216497	2	0.277606
1A	NC_044999.1	PFKFB3	3514259	3554669	0.152043	XM_030290193.2	15	0.0759294	14	0.132388
1A	NC_044999.1	PRKCQ	3634048	3690696	0.175126	XM_002189768.5	19	0.111283	18	0.184365
1A	NC_044999.1	SFMBT2	3867808	3973468	0.150608	XM_030290286.2	21	0.069333	20	0.147756
1A	NC_044999.1	LOC100221871	3997832	4027358	0.140642	XM_030290311.2	8	0.115058	7	0.136499
1A	NC_044999.1	ITIH5	4029596	4076679	0.173907	XM_030290299.2	14	0.0901018	13	0.15577
1A	NC_044999.1	ITIH2	4082761	4108015	0.142977	XM_002190065.4	21	0.0698112	20	0.160841
1A	NC_044999.1	KIN	4109545	4119646	0.207067	XM_002190090.5	13	0.0732041	12	0.139188
1A	NC_044999.1	ATP5F1C	4119669	4126917	0.162131	NM_001245748.1	10	0.130093	9	0.192491
1A	NC_044999.1	TAF3	4129274	4242596	0.131189	XM_030290349.2	7	0.132357	6	0.128922
1A	NC_044999.1	GATA3	4264155	4293193	0.155652	XM_030290358.2	6	0.1277	5	0.167429
1A	NC_044999.1	LOC115498257	4272270	4273005	0.0691547	XR_003963673.2	2	0.0284846	1	0.0694676
1A	NC_044999.1	CELF2	5225023	5773160	0.201358	XM_030263712.2	14	0.0448805	13	0.150482
1A	NC_044999.1	LOC116809292	5804889	5812225	0.13885	XR_004369764.1	2	0.102051	1	0.155686
1A	NC_044999.1	USP6NL	5826615	5936962	0.149795	XM_030290424.2	16	0.0721848	15	0.154297
1A	NC_044999.1	ECHDC3	5956113	5961821	0.0652767	XM_030290444.2	5	0.033558	4	0.0589536
1A	NC_044999.1	PROSER2	5981003	6005369	0.128885	XM_030290488.2	4	0.158734	3	0.141916
1A	NC_044999.1	UPF2	6013962	6065902	0.179497	XM_030290474.2	22	0.0832858	21	0.178822
1A	NC_044999.1	DHTKD1	6071922	6093781	0.144262	XM_030290503.2	17	0.100598	16	0.15826
1A	NC_044999.1	SEC61A2	6094540	6108583	0.0933769	XM_030290513.2	12	0.0286968	11	0.0962193
1A	NC_044999.1	NUDT5	6109970	6121718	0.173725	XM_002191779.5	10	0.0777605	9	0.151363
1A	NC_044999.1	CDC123	6121733	6155192	0.156446	XM_002191837.4	13	0.0812808	12	0.164512
1A	NC_044999.1	CAMK1D	6180496	6386276	0.208513	XM_002192005.5	11	0.0600616	10	0.175683
1A	NC_044999.1	CCDC3	6386580	6431346	0.168725	XM_032752958.1	4	0.110935	3	0.154334
1A	NC_044999.1	LOC115498291	6450390	6452099	0.26186	XR_003963712.2	3	0.343208	2	0.140448
1A	NC_044999.1	OPTN	6459939	6476395	0.269536	XM_002192260.5	14	0.115259	13	0.258074
1A	NC_044999.1	MCM10	6478122	6496268	0.198888	XM_030290662.2	20	0.0740496	19	0.181457
1A	NC_044999.1	PHYH	6498627	6507574	0.116705	XM_002192511.4	9	0.103481	8	0.107756
1A	NC_044999.1	SEPHS1	6513027	6536239	0.133811	XM_012568818.3	9	0.0234053	8	0.133559
1A	NC_044999.1	LOC116809313	6528395	6533005	0.116708	XR_004369793.1	4	0.0428021	3	0.111361
1A	NC_044999.1	LOC116809312	6535575	6540071	0.167314	XR_004369792.1	2	0.141186	1	0.113623
1A	NC_044999.1	BEND7	6549877	6596793	0.132368	XM_030290719.2	7	0.0612523	6	0.102607
1A	NC_044999.1	PRPF18	6608410	6623438	0.284815	XM_012568844.3	11	0.0879766	10	0.263768
1A	NC_044999.1	FRMD4A	6626566	6981961	0.176252	XM_030290798.2	24	0.0813242	23	0.203877
1A	NC_044999.1	MIR1460	6710562	6710658	0.00205761	NR_105660.1	3	0.00137174
1A	NC_044999.1	FAM107B	7050364	7108772	0.169126	XM_012568845.3	5	0.0273709	4	0.170229
1A	NC_044999.1	HSPA14	7191774	7203143	0.193916	XM_002193201.3	14	0.0940887	13	0.167324
1A	NC_044999.1	SUV39H2	7203967	7217075	0.135518	XM_030290973.2	6	0.0994023	5	0.104063
1A	NC_044999.1	DCLRE1C	7214891	7229119	0.0996412	XM_030290945.2	14	0.0487723	13	0.0820821
1A	NC_044999.1	MEIG1	7229255	7244327	0.197989	XR_003963745.2	4	0.0679909	3	0.145272
1A	NC_044999.1	TMEM243	7248230	7256970	0.22758	XM_030291068.2	4	0.0674969	3	0.177986
1A	NC_044999.1	DMTF1	7256972	7286437	0.166001	XM_030291024.2	17	0.119674	16	0.133598
1A	NC_044999.1	ELAPOR2	7320162	7415496	0.207724	XM_030291082.2	22	0.103475	21	0.211328
1A	NC_044999.1	GRM3	7420593	7523088	0.214211	XM_030291103.2	7	0.192075	6	0.197016
1A	NC_044999.1	LOC116809327	7523482	7534769	0.171516	XR_004369819.1	2	0.165523	1	0.152041
1A	NC_044999.1	LOC115498364	7559722	7572951	0.146146	XR_003963765.2	2	0.143484	1	0.108355
1A	NC_044999.1	LOC116809330	7728614	7738724	0.137611	XR_004369821.1	3	0.0696465	2	0.145259
1A	NC_044999.1	LOC115498367	7978265	7980706	-0.00598894	XM_030291130.2	2	-0.00299447	1	0
1A	NC_044999.1	LOC115498373	7980692	7981969	0.00301124	XM_030291142.2	2	0.0179514	1	0
1A	NC_044999.1	LOC115498374	7982177	7982553	0.176681	XR_003963772.1	2	0.129989	1	0.205467
1A	NC_044999.1	SEMA3D	8067450	8203124	0.142203	XM_030291165.2	18	0.0307899	17	0.0944554
1A	NC_044999.1	LOC115498392	8112559	8113031	0.340466	XR_003963773.2	2	0.170233	1	0
1A	NC_044999.1	SEMA3A	8547825	8711609	0.159873	XM_012568879.3	17	0.0702577	16	0.156084
1A	NC_044999.1	SEMA3E	8832762	8961958	0.191507	XM_004177190.4	17	0.0803762	16	0.180008
1A	NC_044999.1	PCLO	9049617	9364174	0.140226	XM_030291223.2	26	0.0764525	25	0.15037
1A	NC_044999.1	LOC115498407	9303262	9344020	0.174636	XR_004366736.1	4	0.191794	3	0.11769
1A	NC_044999.1	CACNA2D1	9510774	9869900	0.134525	XM_030291319.2	40	0.0540579	39	0.151201
1A	NC_044999.1	HGF	9919489	9975642	0.185332	XM_030291353.2	18	0.0525479	17	0.160661
1A	NC_044999.1	LOC116809336	10323413	10332807	0.116116	XR_004369829.1	2	0.187705	1	0.1492
1A	NC_044999.1	SEMA3C	10333119	10448723	0.207003	XM_002187727.5	18	0.0931109	17	0.209335
1A	NC_044999.1	CD36	10469210	10505269	0.175096	XM_002187948.5	14	0.0996544	13	0.123809
1A	NC_044999.1	GNAT3	10544460	10568682	0.194863	XM_002187984.3	8	0.0943392	7	0.190638
1A	NC_044999.1	GNAI1	10644654	10678204	0.193308	XM_030291453.2	8	0.0785574	7	0.130273
1A	NC_044999.1	LOC116809223	10678353	10698064	0.13618	XM_032752236.1	2	0.0946327	1	0.147145
1A	NC_044999.1	MAGI2	10960100	11659386	0.203446	XM_030263736.2	24	0.0557643	23	0.215139
1A	NC_044999.1	LOC115493510	11422754	11440522	0.244725	XR_003958332.2	2	0.291084	1	0.210475
1A	NC_044999.1	LOC116807735	11482780	11563954	0.30641	XR_004366747.1	3	0.322327	2	0.360609
1A	NC_044999.1	LOC116807734	11582252	11645559	0.201775	XR_004366746.1	3	0.0981693	2	0.193117
1A	NC_044999.1	PHTF2	11682062	11746114	0.193495	XM_030291526.2	14	0.0546026	13	0.202173
1A	NC_044999.1	TMEM60	11746557	11756167	0.262911	XM_030291578.2	3	0.0828779	2	0.273703
1A	NC_044999.1	RSBN1L	11754826	11800952	0.22115	XM_030291548.2	8	0.144138	7	0.19239
1A	NC_044999.1	PTPN12	11812455	11881457	0.185856	XM_012568891.3	18	0.0621079	17	0.141824
1A	NC_044999.1	GSAP	11915642	11960631	0.299802	XM_030263746.2	31	0.0860419	30	0.286921
1A	NC_044999.1	CCDC146	11960420	12027720	0.233219	XM_030263743.2	20	0.143876	19	0.232173
1A	NC_044999.1	FGL2	12007158	12013807	0.172508	XM_002187985.5	2	0.169898	1	0.128904
1A	NC_044999.1	FAM185A	12027971	12062467	0.251479	XM_030263754.2	8	0.0536856	7	0.235882
1A	NC_044999.1	FBXL13	12062468	12122723	0.206398	XM_032752242.1	17	0.074626	16	0.138965
1A	NC_044999.1	LRRC17	12096221	12110858	0.230007	XM_030263753.2	5	0.146814	4	0.240274
1A	NC_044999.1	ARMC10	12124863	12132270	0.0756676	XM_030263756.2	6	0.0842479	5	0.0692785
1A	NC_044999.1	NAPEPLD	12129986	12155470	0.170816	XR_004366749.1	8	0.0707156	7	0.170871
1A	NC_044999.1	LOC116807736	12155463	12170806	0.161366	XR_004366753.1	4	0.130739	3	0.122193
1A	NC_044999.1	PMPCB	12172316	12180489	0.281533	XM_030263747.2	13	0.0539784	12	0.261955
1A	NC_044999.1	DNAJC2	12180441	12196818	0.209969	XM_030263750.2	17	0.0660722	16	0.156988
1A	NC_044999.1	PSMC2	12197075	12205212	0.282115	NM_001245126.1	12	0.0823714	11	0.247667
1A	NC_044999.1	SLC26A5	12207184	12240830	0.151119	XM_032743661.1	19	0.053877	18	0.145769
1A	NC_044999.1	RELN	12246789	12525733	0.200553	XM_012568876.3	65	0.0715944	64	0.181367
1A	NC_044999.1	LOC115498505	12252099	12265195	0.172029	XR_003963821.2	3	0.264255	2	0.169355
1A	NC_044999.1	LOC116806665	12265433	12268600	0.17212	XR_004365700.1	2	0.123018	1	0.164503
1A	NC_044999.1	LOC116806668	12276179	12282268	0.257918	XR_004365703.1	2	0.107225	1	0.310836
1A	NC_044999.1	ORC5	12552199	12617667	0.167333	XM_004186163.4	15	0.0681748	14	0.125235
1A	NC_044999.1	LOC115498517	12655409	12661123	0.157001	XR_003963823.2	2	0.161555	1	0.218909
1A	NC_044999.1	LHFPL3	12669655	12901694	0.192189	XM_012568867.3	4	0.0956874	3	0.19757
1A	NC_044999.1	LOC116807737	12890760	12954854	0.193563	XR_004366754.1	3	0.0974721	2	0.142072
1A	NC_044999.1	KMT2E	12954830	13012414	0.172405	XM_030263760.2	29	0.0931712	28	0.155187
1A	NC_044999.1	SRPK2	13014152	13139322	0.212982	XM_030263768.2	17	0.0362003	16	0.212765
1A	NC_044999.1	PUS7	13158547	13180342	0.197513	XM_030291674.2	19	0.0678948	18	0.192939
1A	NC_044999.1	RINT1	13180973	13191867	0.236082	XM_032743698.1	14	0.131081	13	0.231893
1A	NC_044999.1	EFCAB10	13192513	13194240	0.354665	XM_030291736.2	4	0.0422429	3	0.479497
1A	NC_044999.1	ATXN7L1	13201329	13311941	0.251901	XM_030291703.2	12	0.0704396	11	0.218496
1A	NC_044999.1	LOC115498534	13312054	13316776	0.237266	XR_003963831.2	3	0.102753	2	0.136479
1A	NC_044999.1	CDHR3	13334090	13368866	0.220454	XM_030291753.2	19	0.117318	18	0.227251
1A	NC_044999.1	SYPL1	13381141	13386867	0.350012	XM_002189048.4	5	0.239005	4	0.311365
1A	NC_044999.1	NAMPT	13412606	13443178	0.292845	XM_030291774.2	12	0.135499	11	0.306822
1A	NC_044999.1	CCDC71L	13551216	13560176	0.348038	XM_032743738.1	1	0.348038
1A	NC_044999.1	PIK3CG	13582456	13615435	0.317549	XM_030291815.2	11	0.121719	10	0.293463
1A	NC_044999.1	LOC115498554	13631560	13638477	0.336357	XR_003963841.2	2	0.271701	1	0.430856
1A	NC_044999.1	PRKAR2B	13638620	13713941	0.242021	XM_030291841.2	11	0.0655222	10	0.229255
1A	NC_044999.1	LOC115498555	13717568	13719771	0.164084	XR_003963842.2	2	0.180168	1	0.129051
1A	NC_044999.1	HBP1	13720204	13737673	0.208954	XM_032743761.1	11	0.129789	10	0.211176
1A	NC_044999.1	COG5	13736887	13910790	0.244269	XM_032743754.1	22	0.0502402	21	0.233296
1A	NC_044999.1	LOC116806689	13818117	13820647	0.138993	XR_004365723.1	2	0.0752691	1	0.0874035
1A	NC_044999.1	GPR22	13875925	13881942	0.268832	XM_030291894.2	3	0.0876386	2	0.307233
1A	NC_044999.1	DUS4L	13910690	13920987	0.343252	XM_002192956.4	7	0.184067	6	0.26717
1A	NC_044999.1	BCAP29	13924527	13947428	0.304079	XM_032743788.1	8	0.0564172	7	0.271136
1A	NC_044999.1	SLC26A4	13953435	13977460	0.189311	XM_030291951.2	20	0.0461987	19	0.173597
1A	NC_044999.1	CBLL1	13978355	13988428	0.238857	XM_030291977.2	6	0.125611	5	0.187034
1A	NC_044999.1	SLC26A3	13990946	14008604	0.319619	XM_030292006.2	21	0.16232	20	0.309466
1A	NC_044999.1	DLD	14030482	14045289	0.288282	XM_004177188.3	14	0.104292	13	0.264144
1A	NC_044999.1	LAMB1	14048522	14090427	0.275486	XM_030292018.2	33	0.146641	32	0.268843
1A	NC_044999.1	LOC116809226	14090276	14094803	0.250916	XM_032752245.1	5	0.220275	4	0.169661
1A	NC_044999.1	LAMB4	14094628	14144942	0.219753	XM_032752258.1	39	0.164709	38	0.215538
1A	NC_044999.1	ERGIC2	14142628	14165116	0.381734	XM_030292043.2	14	0.0866055	13	0.380935
1A	NC_044999.1	LRRK2	14173092	14236980	0.329777	XM_032743815.1	51	0.0758216	50	0.277584
1A	NC_044999.1	LOC115498587	14253138	14260067	0.223642	XR_003963869.2	3	0.224326	2	0.245054
1A	NC_044999.1	LOC116806699	14264640	14272056	0.26951	XR_004365725.1	4	0.249257	3	0.29043
1A	NC_044999.1	SLC2A13	14283306	14425858	0.29247	XM_002193899.4	10	0.11428	9	0.284039
1A	NC_044999.1	C1AH12orf40	14433668	14450108	0.250659	XM_030292094.2	13	0.180296	12	0.269737
1A	NC_044999.1	ABCD2	14460016	14498851	0.175562	XM_002193991.4	10	0.0675374	9	0.183605
1A	NC_044999.1	KIF21A	14523233	14611571	0.252673	XM_002194128.5	37	0.0355007	36	0.171381
1A	NC_044999.1	LOC100189933	14612923	14673354	0.280704	XM_030255730.2	23	0.0952476	22	0.191397
1A	NC_044999.1	LOC105758548	14687943	14719412	0.161497	XM_032743863.1	12	0.0200833	11	0.160334
1A	NC_044999.1	LOC105758559	14720896	14780361	0.325873	XM_032743861.1	23	0.0269261	22	0.221029
1A	NC_044999.1	CPNE8	14806213	14876919	0.338783	XM_030255795.2	20	0.035165	19	0.306122
1A	NC_044999.1	TPRKB	14971556	14976036	0.124795	XM_002187641.4	4	0.151945	3	0.150351
1A	NC_044999.1	LOC115490609	14977391	14979807	0.149273	XR_003956691.2	2	0.172807	1	0.139928
1A	NC_044999.1	GTSE1	14983160	14992698	0.158439	XM_030255852.2	11	0.132676	10	0.139119
1A	NC_044999.1	TRMU	14993173	15004076	0.141748	XM_030255919.2	11	0.0771171	10	0.150294
1A	NC_044999.1	CELSR1	15013075	15177684	0.22688	XM_030255900.2	35	0.106732	34	0.241349
1A	NC_044999.1	LOC100221272	15202624	15222064	0.206253	XM_030255947.2	3	0.23041	2	0.120687
1A	NC_044999.1	GRAMD4	15221630	15297959	0.272496	XM_030255936.2	19	0.092773	18	0.265793
1A	NC_044999.1	CERK	15415765	15458785	0.208944	XM_030255987.2	13	0.104673	12	0.20396
1A	NC_044999.1	TBC1D22A	15484158	15622874	0.25243	XM_030255998.2	14	0.139173	13	0.239572
1A	NC_044999.1	LOC115490655	15740416	15747904	0.220677	XR_003956700.2	5	0.205082	4	0.212668
1A	NC_044999.1	LOC115493537	15812179	15816228	0.167283	XR_003958396.2	3	0.172438	2	0.188854
1A	NC_044999.1	LOC115490662	15821696	15834618	0.19325	XR_003956701.2	3	0.33928	2	0.306112
1A	NC_044999.1	TAFA5	16319906	16786738	0.232634	XR_004366756.1	7	0.201323	6	0.231575
1A	NC_044999.1	LOC116807738	16362588	16381629	0.260611	XR_004366763.1	2	0.244554	1	0.262957
1A	NC_044999.1	LOC115493513	16426266	16428481	0.208819	XR_003958348.2	2	0.203332	1	-0.0117062
1A	NC_044999.1	LOC100222191	17880749	17884792	0.219933	LOC100222191	2	0.232203	1	0.116749
1A	NC_044999.1	BRD1	17890838	17957692	0.344831	XM_032743975.1	15	0.116521	14	0.323033
1A	NC_044999.1	LOC115490688	17947809	17950415	0.339511	XR_003956711.2	2	0.45117	1	0.259306
1A	NC_044999.1	ZBED4	17957764	17983273	0.369248	XM_030256142.2	4	0.323087	3	0.344247
1A	NC_044999.1	ALG12	17989080	18004466	0.312228	XM_030256179.2	10	0.125197	9	0.250725
1A	NC_044999.1	CRELD2	18004673	18017512	0.102256	XM_030256191.2	10	0.0231661	9	0.102337
1A	NC_044999.1	LOC115490690	18030454	18056583	0.259618	XR_003956712.2	3	0.192476	2	0.359793
1A	NC_044999.1	LOC115490693	18123119	18131243	0.207136	XR_003956713.2	2	0.212551	1	0.359944
1A	NC_044999.1	PIM3	18289556	18294620	0.123524	XM_030256220.2	6	0.130323	5	0.0935604
1A	NC_044999.1	LOC115490696	18508111	18539071	0.113727	XR_003956714.2	2	0.105143	1	0.108323
1A	NC_044999.1	LOC115490697	18614277	18659317	0.256698	XR_003956715.2	3	0.104379	2	0.209203
1A	NC_044999.1	LOC115490698	18708268	18737560	0.218793	XR_003956716.2	4	0.102262	3	0.194611
1A	NC_044999.1	IL17REL	19110250	19152727	0.185048	XM_030256264.2	17	0.0664269	16	0.172081
1A	NC_044999.1	MLC1	19160177	19173563	0.23665	XM_002188663.5	12	0.0714105	11	0.193844
1A	NC_044999.1	MOV10L1	19177688	19207043	0.182955	XM_032744051.1	27	0.0577584	26	0.124049
1A	NC_044999.1	PANX2	19223614	19244315	0.224124	XM_002188771.4	4	0.245637	3	0.221166
1A	NC_044999.1	LOC115490732	19265595	19268871	0.300711	XM_030256402.2	1	0.300711
1A	NC_044999.1	TRABD	19281679	19314214	0.232645	XM_030256393.2	10	0.122529	9	0.208637
1A	NC_044999.1	SELENOO	19316908	19327981	0.283388	NM_001199783.1	9	0.0888998	8	0.339739
1A	NC_044999.1	TUBGCP6	19336185	19377356	0.154818	XM_012568975.3	45	0.0995371	44	0.148197
1A	NC_044999.1	LOC100230811	19378512	19382636	0.1679	XM_030263959.2	4	0.244568	3	0.0783885
1A	NC_044999.1	MAPK12	19395506	19428250	0.158937	XM_030256419.2	12	0.079211	11	0.168169
1A	NC_044999.1	MAPK11	19434981	19466863	0.171523	XM_030256437.2	12	0.0233413	11	0.117525
1A	NC_044999.1	LOC115490768	19515315	19517776	0.183269	XR_003956736.2	2	0.125615	1	0.276673
1A	NC_044999.1	PLXNB2	19516940	19768058	0.250234	XM_030256453.2	40	0.10784	39	0.314885
1A	NC_044999.1	ZNF800	19888554	19902167	0.229857	XM_030256497.2	6	0.0778666	5	0.219753
1A	NC_044999.1	LOC115490773	19903821	19907216	0.103974	XR_003956744.2	2	0.0156763	1	0.109298
1A	NC_044999.1	GRM8	19933093	20248074	0.195625	XM_030256511.2	12	0.0448155	11	0.192243
1A	NC_044999.1	LOC116806729	20289965	20329061	0.195458	XR_004365757.1	5	0.154644	4	0.233712
1A	NC_044999.1	LOC115490799	20465357	20466250	0.213237	XR_003956749.1	2	0	1	0.213338
1A	NC_044999.1	LOC116806730	20516324	20520050	0.119995	XR_004365760.1	3	0.0427138	2	0.151513
1A	NC_044999.1	POT1	20721401	20777153	0.261017	XM_030256557.2	21	0.101421	20	0.225882
1A	NC_044999.1	GPR37	20812149	20828099	0.326036	XM_030256586.2	2	0.167194	1	0.364551
1A	NC_044999.1	LOC100190084	21035608	21058243	0.282708	NM_001245495.1	7	0.0438895	6	0.252412
1A	NC_044999.1	SPAM1	21063377	21087878	0.244885	XM_002190517.3	5	0.132573	4	0.251139
1A	NC_044999.1	HYAL4	21111279	21123336	0.349196	XM_032753122.1	10	0.153363	9	0.109478
1A	NC_044999.1	LOC100224131	21126712	21136831	0.273274	XM_030256612.2	3	0.110162	2	0.263779
1A	NC_044999.1	LOC115498049	21166361	21168721	0.308815	XR_004365764.1	2	0.174128	1	0.336853
1A	NC_044999.1	WASL	21169114	21218998	0.286204	XM_030256624.2	11	0.0931455	10	0.330237
1A	NC_044999.1	LOC116806733	21210118	21212491	0.264478	XR_004365768.1	2	0.249441	1	0.257262
1A	NC_044999.1	LMOD2	21236661	21243176	0.249406	XM_030256689.2	3	0.214061	2	0.233937
1A	NC_044999.1	LOC115490816	21243293	21249740	0.173737	XR_004365770.1	5	0.0754162	4	0.170953
1A	NC_044999.1	ASB15	21252772	21262786	0.28526	XM_032753132.1	13	0.146801	12	0.121731
1A	NC_044999.1	NDUFA5	21262819	21266952	0.437093	NM_001245806.2	5	0.11024	4	0.340227
1A	NC_044999.1	IQUB	21269083	21289762	0.260062	XM_002190705.4	12	0.123984	11	0.178564
1A	NC_044999.1	ATP6AP1	21293047	21344110	0.231539	XM_002190738.4	10	0.153553	9	0.210183
1A	NC_044999.1	SLC13A1	21367806	21393581	0.256336	XM_032744191.1	15	0.025305	14	0.221125
1A	NC_044999.1	CADPS2	21464973	21748057	0.228967	XM_030256757.2	32	0.056603	31	0.212482
1A	NC_044999.1	FEZF1	21756983	21760430	0.326385	XM_030256923.2	4	0.131588	3	0.413839
1A	NC_044999.1	AASS	21786354	21813928	0.15955	XM_030256934.2	23	0.0729904	22	0.1144
1A	NC_044999.1	PTPRZ1	21818935	21949951	0.253725	XM_012568935.3	31	0.0401783	30	0.28876
1A	NC_044999.1	FAM3C	22112100	22141153	0.203269	XM_030257030.2	10	0.059766	9	0.180152
1A	NC_044999.1	WNT16	22140303	22156599	0.195635	XM_030257017.2	4	0.139644	3	0.17038
1A	NC_044999.1	CPED1	22172187	22317766	0.188853	XM_030257047.2	23	0.0839328	22	0.158948
1A	NC_044999.1	ING3	22330179	22347049	0.20915	XM_030257109.2	13	0.0321352	12	0.223793
1A	NC_044999.1	LOC115490906	22353372	22362296	0.107219	XR_003956829.2	2	0.0969888	1	0.00126369
1A	NC_044999.1	LOC115490905	22356185	22372345	0.216673	XR_004365798.1	4	0.0664776	3	0.108763
1A	NC_044999.1	TSPAN12	22372376	22414069	0.145113	XM_030257178.2	8	0.100205	7	0.132242
1A	NC_044999.1	KCND2	22418534	22679432	0.18426	XM_002192484.5	7	0.13558	6	0.121856
1A	NC_044999.1	LOC115490928	22742644	22792367	0.183499	XR_003956836.2	3	0.0238743	2	0.150306
1A	NC_044999.1	LOC115490930	23099721	23117665	0.13334	XR_003956838.2	3	0.169995	2	0.11256
1A	NC_044999.1	LOC105758561	23272287	23284461	0.18534	XM_030257268.2	12	0.0397616	11	0.186583
1A	NC_044999.1	LOC116806758	23287462	23289399	0.367842	XR_004365814.1	2	0.411013	1	0.348053
1A	NC_044999.1	ANKRD26	23289431	23337869	0.205474	XM_030257195.2	39	0.119162	38	0.182501
1A	NC_044999.1	LSM8	23344019	23349460	0.16444	XM_002189756.5	4	0.0812709	3	0.193067
1A	NC_044999.1	LOC115490931	23357464	23361462	0.157866	XR_004365815.1	2	0.156332	1	0.387074
1A	NC_044999.1	CTTNBP2	23473399	23551432	0.229305	XM_030257294.2	23	0.0570057	22	0.243543
1A	NC_044999.1	CFTR	23556287	23643900	0.199582	XM_030257297.2	27	0.0542622	26	0.216265
1A	NC_044999.1	ASZ1	23664351	23700113	0.0978179	XM_002192880.4	13	0.0530131	12	0.0904387
1A	NC_044999.1	WNT2	23706973	23724553	0.168836	XM_002192957.3	5	0.0421082	4	0.140199
1A	NC_044999.1	ST7	23741086	23874240	0.152274	XM_030257316.2	15	0.0626271	14	0.147091
1A	NC_044999.1	CAPZA2	23885303	23917595	0.153292	XM_002193255.4	10	0.0409134	9	0.133456
1A	NC_044999.1	LOC115490941	23936745	23959839	0.162087	XR_003956867.2	2	0.181176	1	0.164708
1A	NC_044999.1	MET	23937302	24027540	0.155912	XM_030257369.2	21	0.0536554	20	0.141051
1A	NC_044999.1	CAV1	24078538	24097960	0.142196	XM_030257398.2	3	0.341448	2	0.167008
1A	NC_044999.1	CAV2	24104169	24113678	0.158921	XM_030257404.2	3	0.047811	2	0.139854
1A	NC_044999.1	LOC115490944	24150287	24154245	0.097552	XR_003956872.2	2	0.0235144	1	0.108346
1A	NC_044999.1	LOC116806776	24176081	24188567	0.169096	XR_004365828.1	3	0.0817674	2	0.167581
1A	NC_044999.1	TES	24193968	24221498	0.189432	XM_002193591.5	7	0.166716	6	0.18573
1A	NC_044999.1	TFEC	24285998	24376106	0.258338	XM_030257459.2	8	0.0856144	7	0.221761
1A	NC_044999.1	LOC115490946	24413027	24440611	0.160758	XR_003956874.2	4	0.0615152	3	0.130401
1A	NC_044999.1	LOC115493538	24483770	24484137	0.0316468	XR_003958397.2	2	0.000374179	1	0.0472393
1A	NC_044999.1	LOC115490949	24560808	24592549	0.219493	XR_003956878.2	4	0.178029	3	0.210214
1A	NC_044999.1	LOC115490950	24600068	24601531	0.138101	XR_004365837.1	2	0.153492	1	0.107635
1A	NC_044999.1	LOC115490952	24673311	24693393	0.204896	XR_003956887.2	3	0.193162	2	0.138363
1A	NC_044999.1	MDFIC	24777904	24829264	0.345787	XM_002192535.5	5	0.0685416	4	0.2941
1A	NC_044999.1	LOC105758560	24829340	24842986	0.181912	XR_001122592.3	3	0.164491	2	0.156819
1A	NC_044999.1	FOXP2	24923961	25320799	0.250747	XM_032752195.1	19	0.0765462	18	0.262394
1A	NC_044999.1	LOC116806791	25342249	25353184	0.191761	XR_004365843.1	2	0.345446	1	0.175005
1A	NC_044999.1	LOC115490959	25353638	25356396	0.174443	XM_030257537.2	1	0.174443
1A	NC_044999.1	PPP1R3A	25363015	25396835	0.288805	XM_002192775.3	4	0.141708	3	0.15693
1A	NC_044999.1	SMIM30	25648216	25652210	0.253052	XM_030257558.2	2	0.145636	1	0.298219
1A	NC_044999.1	GPR85	25668841	25675505	0.244236	XM_030257582.2	3	0.200794	2	0.222399
1A	NC_044999.1	LOC115490971	25688760	25729027	0.276988	XR_003956909.2	2	0.295953	1	0.371382
1A	NC_044999.1	BMT2	25760965	25791775	0.154222	XM_030257631.2	5	0.174095	4	0.146384
1A	NC_044999.1	TMEM168	25793520	25816586	0.245148	XM_002194668.5	5	0.153029	4	0.227291
1A	NC_044999.1	LSMEM1	25868063	25878177	0.330696	XM_030257659.2	5	0.133653	4	0.334792
1A	NC_044999.1	IFRD1	25878320	25889100	0.29477	XM_030257643.2	12	0.170275	11	0.248523
1A	NC_044999.1	LOC115490983	25889224	25898101	0.282482	XR_003956927.2	2	0.353423	1	0.250752
1A	NC_044999.1	ZNF277	25923165	25970175	0.273555	XM_030257698.2	12	0.0709434	11	0.252712
1A	NC_044999.1	LOC100226070	26024926	26122857	0.176059	XR_004365882.1	3	0.0792566	2	0.169366
1A	NC_044999.1	LOC115490996	26307251	26395784	0.171114	XR_003956942.2	5	0.102512	4	0.185663
1A	NC_044999.1	LOC116806811	26425857	26428164	0.169454	XR_004365886.1	2	0.282641	1	0.179491
1A	NC_044999.1	DNAJB9	26721986	26731900	0.186844	XM_032744478.1	4	0.137042	3	0.181082
1A	NC_044999.1	THAP5	26730990	26736792	0.217663	XM_012568969.3	3	0.141914	2	0.13272
1A	NC_044999.1	VT1	26787401	26791397	0.209758	XM_032744484.1	3	0.117148	2	0.251061
1A	NC_044999.1	PNPLA8	26804136	26879271	0.241866	XM_030257916.2	10	0.032286	9	0.185311
1A	NC_044999.1	NRCAM	26898167	27042093	0.171511	XM_030257933.2	34	0.0727614	33	0.152549
1A	NC_044999.1	CNTN1	27075447	27285508	0.200978	XM_030258294.2	24	0.100283	23	0.23742
1A	NC_044999.1	PDZRN4	27329375	27558025	0.216178	XM_030258315.2	9	0.0803801	8	0.231208
1A	NC_044999.1	LOC115491077	27634342	27637584	0.261789	XR_003957041.1	2	0.117914	1	0.268239
1A	NC_044999.1	GXYLT1	27725530	27754773	0.195234	XM_030258335.2	8	0.0672156	7	0.145114
1A	NC_044999.1	YAF2	27763322	27794908	0.242127	XM_002195883.5	4	0.0532119	3	0.164288
1A	NC_044999.1	LOC115491098	27795071	27802521	0.251073	XR_003957056.2	3	0.395422	2	0.150592
1A	NC_044999.1	ZCRB1	27826865	27837667	0.208982	XM_002195976.4	8	0.195874	7	0.244391
1A	NC_044999.1	PPHLN1	27837775	27900403	0.275804	XM_030258393.2	11	0.0883474	10	0.176997
1A	NC_044999.1	PRICKLE1	27903915	27969326	0.264666	XM_030258358.2	8	0.109415	7	0.23669
1A	NC_044999.1	LOC116806849	28082994	28094340	0.217361	XR_004365920.1	2	0.12557	1	0.223029
1A	NC_044999.1	ADAMTS20	28197271	28282972	0.429327	XM_002194104.4	39	0.180833	38	0.366309
1A	NC_044999.1	LOC116806850	28305748	28309998	0.117927	XR_004365922.1	2	0.0589636	1	0
1A	NC_044999.1	PUS7L	28332320	28343819	0.481433	XM_002194129.5	8	0.163609	7	0.464393
1A	NC_044999.1	IRAK4	28343422	28356837	0.366062	XM_030258451.2	12	0.139036	11	0.340988
1A	NC_044999.1	TWF1	28357950	28377407	0.305176	XM_002194188.5	9	0.172494	8	0.308548
1A	NC_044999.1	TMEM117	28388193	28567699	0.401976	XM_030258499.2	7	0.125164	6	0.383375
1A	NC_044999.1	LOC115491155	28406803	28412783	0.219586	XM_030258523.2	2	0.0441851	1	0.230252
1A	NC_044999.1	NELL2	28596222	28729385	0.372914	XM_032744686.1	20	0.173499	19	0.344583
1A	NC_044999.1	LOC101232981	28773042	28778270	0.274479	XM_004177219.3	5	0.185702	4	0.250384
1A	NC_044999.1	DBX2	28785188	28802609	0.239942	NM_001245189.2	4	0.146182	3	0.234121
1A	NC_044999.1	LOC115493514	28802880	28824060	0.364021	XR_003958354.2	3	0.190631	2	0.524563
1A	NC_044999.1	ANO6	28844667	28914685	0.396785	XM_030263784.2	20	0.166585	19	0.39057
1A	NC_044999.1	LOC105758557	28969772	28995332	0.309419	XR_004366775.1	6	0.211469	5	0.264741
1A	NC_044999.1	ARID2	28995457	29087707	0.308879	XM_030263778.2	21	0.0412566	20	0.152856
1A	NC_044999.1	SCAF11	29092486	29143007	0.294357	XM_030263780.2	16	0.0508335	15	0.264886
1A	NC_044999.1	SLC38A1	29167149	29209459	0.285928	XM_002194550.5	16	0.0580831	15	0.292863
1A	NC_044999.1	SLC38A2	29234453	29251871	0.165124	XM_030258555.2	16	0.0776296	15	0.148048
1A	NC_044999.1	LOC116806895	29252100	29253276	0.332649	XR_004365958.1	2	0.271827	1	0
1A	NC_044999.1	LOC116807758	29272760	29272919	0.00218627	XR_004366856.1	1	0.00218627
1A	NC_044999.1	SLC38A4	29351812	29373116	0.286751	XM_002196751.4	16	0.187778	15	0.231256
1A	NC_044999.1	LOC115491163	29384662	29399090	0.174259	XR_003957138.2	2	0.0355218	1	0.183601
1A	NC_044999.1	LOC115493539	29457126	29458139	0.23713	XR_003958398.2	2	0.245011	1	-0.0350413
1A	NC_044999.1	LOC115491165	29458262	29470290	0.231096	XR_003957142.2	4	0.080333	3	0.267705
1A	NC_044999.1	AMIGO2	29496969	29512888	0.256731	XM_002196792.5	2	0.171414	1	0.282629
1A	NC_044999.1	RPAP3	29665252	29684743	0.210463	XM_030258619.2	17	0.0688769	16	0.192232
1A	NC_044999.1	ATP23	29684789	29690753	0.140404	XM_030258627.2	6	0.0272485	5	0.1222
1A	NC_044999.1	LRIG3	29933178	29970802	0.333262	XM_030258636.2	19	0.232357	18	0.260796
1A	NC_044999.1	LOC115491195	30123481	30135557	0.263588	XR_003957166.2	2	0.0374141	1	0.264287
1A	NC_044999.1	LOC115491199	30172824	30189063	0.187708	XR_003957169.2	4	0.0977374	3	0.176698
1A	NC_044999.1	SLC16A7	30226874	30306735	0.236789	XM_002186646.4	5	0.135462	4	0.269163
1A	NC_044999.1	TAFA2	30856877	31041231	0.273494	XR_003957185.2	8	0.0863558	7	0.246719
1A	NC_044999.1	USP15	31059837	31121279	0.200087	XM_030258735.2	23	0.112111	22	0.249371
1A	NC_044999.1	LOC115491222	31120310	31131703	0.302777	XR_003957198.2	2	0.313575	1	0.260498
1A	NC_044999.1	MON2	31131788	31197976	0.314005	XM_030258844.2	32	0.106286	31	0.263941
1A	NC_044999.1	LOC116807005	31204913	31207041	0.236006	XM_032744837.1	1	0.236006
1A	NC_044999.1	MIRLET7I	31206107	31206198	0.00187793	NR_049003.1	1	0.00187793
1A	NC_044999.1	PPM1H	31230341	31361197	0.340835	XM_030258856.2	10	0.105385	9	0.333293
1A	NC_044999.1	AVPR1A	31435067	31441358	0.175078	XM_030258864.2	2	0.232647	1	0.169442
1A	NC_044999.1	RXYLT1	31520489	31531563	0.280717	XM_002188123.5	6	0.251952	5	0.266167
1A	NC_044999.1	LOC115491241	31537513	31540006	0.326752	XR_003957212.2	4	0.153683	3	0.23201
1A	NC_044999.1	SRGAP1	31561921	31701263	0.394356	XM_030258880.2	22	0.135523	21	0.361933
1A	NC_044999.1	C1AH12orf66	31720369	31729890	0.376303	XM_030258896.2	3	0.132394	2	0.375981
1A	NC_044999.1	RPL18A	31731305	31734781	0.359465	XM_002187560.4	5	0.488817	4	0.409652
1A	NC_044999.1	LOC115493544	31732777	31732908	0.00112233	XR_003958403.1	1	0.00112233
1A	NC_044999.1	XPOT	31736187	31762361	0.322998	XM_030258922.2	26	0.135713	25	0.242653
1A	NC_044999.1	TBK1	31765531	31793835	0.280887	XM_004176090.4	21	0.0851175	20	0.271376
1A	NC_044999.1	RASSF3	31807004	31899160	0.251952	XM_030259000.2	6	0.316871	5	0.198123
1A	NC_044999.1	GNS	31904320	31924636	0.31934	XM_012569056.3	14	0.140797	13	0.353452
1A	NC_044999.1	TBC1D30	31925339	31986419	0.29441	XM_030258979.2	14	0.1297	13	0.223573
1A	NC_044999.1	WIF1	32024862	32062188	0.230662	XM_002188504.5	10	0.160056	9	0.207355
1A	NC_044999.1	LEMD3	32080952	32123050	0.23908	XM_030259036.2	13	0.0412856	12	0.261617
1A	NC_044999.1	MSRB3	32123971	32201939	0.288945	XM_032744954.1	8	0.0259894	7	0.300715
1A	NC_044999.1	LOC115491300	32146438	32153784	0.219819	XR_003957263.2	2	0.287555	1	0.241536
1A	NC_044999.1	LOC115491297	32159481	32185289	0.333852	XR_003957262.2	3	0.497072	2	0.354134
1A	NC_044999.1	LOC116807728	32288514	32289164	0.112869	XM_032746428.1	1	0.112869
1A	NC_044999.1	HMGA2	32341738	32462193	0.250444	XM_004176091.4	5	0.0738465	4	0.254258
1A	NC_044999.1	LOC115491305	32439029	32443330	0.151713	XR_003957265.2	2	0.170754	1	0.14865
1A	NC_044999.1	LLPH	32516279	32525224	0.504311	XM_002188822.5	3	0.325165	2	0.155255
1A	NC_044999.1	TMBIM4	32525707	32532705	0.174548	XM_032751962.1	7	0.0453836	6	0.132341
1A	NC_044999.1	LOC116807087	32528308	32529781	0.139175	XR_004366107.1	2	0.150894	1	0.129974
1A	NC_044999.1	HELB	32564284	32580550	0.365295	XM_030259288.2	13	0.224742	12	0.42347
1A	NC_044999.1	GRIP1	32580361	32886354	0.342293	XM_012569043.3	25	0.14008	24	0.250828
1A	NC_044999.1	LOC115491379	32894993	32909963	0.259215	XR_003957282.2	3	0.295793	2	0.173626
1A	NC_044999.1	CAND1	32930403	32960096	0.295449	XM_002189111.5	15	0.10445	14	0.259367
1A	NC_044999.1	LOC115491386	33026510	33040173	0.317702	XR_003957283.2	2	0.245379	1	0.314873
1A	NC_044999.1	DYRK2	33040189	33055662	0.236029	XM_030259340.2	4	0.0989848	3	0.240191
1A	NC_044999.1	IFNG	33194328	33199442	0.410894	XM_002188923.3	4	0.243395	3	0.481813
1A	NC_044999.1	IL26	33218776	33224518	0.240034	XM_030263686.1	3	0.076637	2	0.242649
1A	NC_044999.1	IL22	33238598	33241458	0.237422	XM_004176093.3	5	0.116293	4	0.101026
1A	NC_044999.1	MDM1	33252759	33274558	0.319251	XM_030259383.2	14	0.149767	13	0.283094
1A	NC_044999.1	LOC115491404	33293671	33302714	0.356697	XR_003957286.2	4	0.371537	3	0.331627
1A	NC_044999.1	RAP1B	33345001	33379794	0.312229	XM_032745184.1	9	0.0652797	8	0.256998
1A	NC_044999.1	NUP107	33382279	33404027	0.299278	XM_030259439.2	28	0.130604	27	0.272319
1A	NC_044999.1	SLC35E3	33404039	33410590	0.396078	XM_002189873.5	5	0.177805	4	0.356791
1A	NC_044999.1	MDM2	33426739	33444313	0.274321	XM_030259463.2	11	0.0957827	10	0.256042
1A	NC_044999.1	CPM	33442845	33473472	0.33016	XM_002189251.5	9	0.201231	8	0.292854
1A	NC_044999.1	CPSF6	33509749	33541622	0.390185	XM_030259508.2	11	0.111239	10	0.447539
1A	NC_044999.1	YEATS4	33550386	33555677	0.294925	XM_012569020.3	8	0.0365737	7	0.29457
1A	NC_044999.1	FRS2	33572946	33624760	0.417204	XM_002190706.4	7	0.295436	6	0.41998
1A	NC_044999.1	CCT2	33626341	33637497	0.260814	XM_030259581.2	16	0.0665043	15	0.222412
1A	NC_044999.1	LRRC10	33639965	33640875	0.172174	XM_030259593.1	1	0.172174
1A	NC_044999.1	LOC100218931	33645460	33655465	0.22398	XM_002189662.5	9	0.178266	8	0.159686
1A	NC_044999.1	BEST3	33656244	33680886	0.212571	XM_002189688.4	10	0.139942	9	0.221706
1A	NC_044999.1	RAB3IP	33691717	33723914	0.206007	XM_030259637.2	11	0.0566978	10	0.162335
1A	NC_044999.1	MYRFL	33733015	33766517	0.28067	XM_030259680.2	24	0.092215	23	0.219522
1A	NC_044999.1	LOC116807268	33845821	33856041	0.201026	XR_004366241.1	2	0.229654	1	0.207195
1A	NC_044999.1	CNOT2	33856439	33938795	0.220686	XM_030259688.2	15	0.0155729	14	0.229193
1A	NC_044999.1	KCNMB4	33944770	33962264	0.238611	XM_004176109.3	3	0.15594	2	0.239138
1A	NC_044999.1	PTPRB	33977191	34039616	0.27555	XM_030259701.2	33	0.115809	32	0.27096
1A	NC_044999.1	LOC115491552	33979683	33982893	0.117166	XR_003957308.2	2	0.137995	1	0.123301
1A	NC_044999.1	PTPRR	34040310	34175857	0.224574	XM_012569001.3	14	0.0515364	13	0.272567
1A	NC_044999.1	TSPAN8	34248591	34265118	0.218322	XM_004176095.4	8	0.141151	7	0.189291
1A	NC_044999.1	LOC115491577	34344364	34346400	0.150191	XR_003957309.2	3	0.130174	2	0.215873
1A	NC_044999.1	LGR5	34346702	34437331	0.247	XM_030259800.2	18	0.065108	17	0.21247
1A	NC_044999.1	LOC115491606	34353936	34368994	0.295741	XR_003957312.2	3	0.333361	2	0.2717
1A	NC_044999.1	ZFC3H1	34454618	34495996	0.241504	XM_002190091.4	35	0.125682	34	0.192116
1A	NC_044999.1	TMEM19	34512123	34525854	0.198745	XM_030259860.2	7	0.102164	6	0.161055
1A	NC_044999.1	RAB21	34535909	34549385	0.312145	XM_002192231.5	7	0.132177	6	0.26368
1A	NC_044999.1	TBC1D15	34560045	34595443	0.197197	XM_012569059.3	18	0.0213276	17	0.186951
1A	NC_044999.1	TPH2	34604476	34654872	0.330836	XM_002192425.5	11	0.211909	10	0.270583
1A	NC_044999.1	TRHDE	34726546	34936030	0.271529	XM_030259927.2	20	0.0823132	19	0.255764
1A	NC_044999.1	LOC115493540	35067419	35068319	0.239796	XR_003958399.2	3	0.230271	2	0.116588
1A	NC_044999.1	LOC115491658	35539350	35540993	0.162688	XR_004366279.1	2	0.1746	1	0.110243
1A	NC_044999.1	LOC115491666	35542157	35557839	0.170035	XR_004366278.1	3	0.136607	2	0.113711
1A	NC_044999.1	LOC115491676	35600676	35625078	0.221965	XR_003957361.2	2	0.162626	1	0.283637
1A	NC_044999.1	KCNC2	35642966	35743733	0.196884	XM_030259945.2	6	0.0761757	5	0.187497
1A	NC_044999.1	CAPS2	35760852	35791297	0.285231	XM_032745535.1	16	0.184747	15	0.27074
1A	NC_044999.1	CCDC107	35792082	35801207	0.177701	XM_012569005.3	6	0.150617	5	0.128542
1A	NC_044999.1	LOC100230452	35806888	35813670	0.285241	XM_030260150.2	6	0.0982925	5	0.202862
1A	NC_044999.1	GLIPR1	35815107	35826032	0.196077	XM_002191024.5	6	0.200024	5	0.155639
1A	NC_044999.1	KRR1	35827821	35832648	0.210129	XM_002193010.5	10	0.0444693	9	0.140322
1A	NC_044999.1	PHLDA1	35965056	35972929	0.146523	XM_030260173.2	3	0.118205	2	0.0951742
1A	NC_044999.1	NAP1L1	35974452	36003358	0.222665	XM_030260185.2	15	0.0830914	14	0.15824
1A	NC_044999.1	BBS10	36068633	36070498	0.215529	XM_030260207.2	1	0.215529
1A	NC_044999.1	OSBPL8	36070817	36154528	0.213372	XM_030260228.2	24	0.0425959	23	0.20882
1A	NC_044999.1	ZDHHC17	36205234	36270806	0.299241	XM_030260292.2	17	0.0724308	16	0.324621
1A	NC_044999.1	CSRP2	36272516	36281213	0.209495	XM_012568989.3	6	0.238974	5	0.159257
1A	NC_044999.1	E2F7	36327948	36346402	0.157902	XM_030260299.2	12	0.0618193	11	0.130793
1A	NC_044999.1	LOC116807739	36361630	36381040	0.195815	XR_004366784.1	2	0.161965	1	0.209331
1A	NC_044999.1	LOC116807729	36384392	36442341	0.11082	XM_032746429.1	2	0.108615	1	0.11094
1A	NC_044999.1	NAV3	36441399	36969258	0.1785	XM_030263791.2	41	0.0703267	40	0.193855
1A	NC_044999.1	LOC116807740	36848632	36856212	0.328252	XR_004366785.1	2	0.304854	1	0.297219
1A	NC_044999.1	LOC115493517	36879877	36882900	0.0877681	XR_003958357.2	3	0.00659509	2	0.0793122
1A	NC_044999.1	LOC115491835	37037768	37058407	0.112505	XR_003957413.2	2	0.106215	1	0.351414
1A	NC_044999.1	LOC115491841	37072909	37074204	0.109605	XR_003957414.2	4	0.038158	3	0.0209598
1A	NC_044999.1	SYT1	37159436	37489319	0.133017	XM_030289368.2	12	0.0387278	11	0.11253
[truncated: 16,903 more rows]
